# Supplementary material for: Gonad Transcriptome and Whole-Genome DNA Methylation Analyses Reveal Potential Sex Determination/Differentiation Mechanisms of the Deep-Sea Mussel Gigantidas platifrons
Source: Frontiers journal article supplement (doi:10.3389/fmars.2022.856291), 2022-04-28
Supplement: Table_1.XLSX [file Table_1.XLSX]

## Sheet: genes with expression
The expressed genes were detected in the gonads of G. platifrons
Geneid	Chr	Start	End	Strand	Length	F3	F1	F2	M3	M1	M2
CSbapl.3	BAPLcs_chr1;BAPLcs_chr1	51473;55226	52184;55476	+;+	963	0	0	0	0	2	0
CSbapl.6	BAPLcs_chr1;BAPLcs_chr1	76230;85703	76413;86787	+;+	1269	48	21	12	25	20	23
CSbapl.8	BAPLcs_chr1;BAPLcs_chr1	140472;140472	141035;141035	-;-	564	4	11	0	51	28	32
CSbapl.9	BAPLcs_chr1;BAPLcs_chr1	166181;166439	166744;166744	-;-	564	12	8	6	43	19	28
CSbapl.10	BAPLcs_chr1;BAPLcs_chr1;BAPLcs_chr1;BAPLcs_chr1;BAPLcs_chr1;BAPLcs_chr1;BAPLcs_chr1;BAPLcs_chr1;BAPLcs_chr1;BAPLcs_chr1;BAPLcs_chr1;BAPLcs_chr1;BAPLcs_chr1;BAPLcs_chr1;BAPLcs_chr1;BAPLcs_chr1;BAPLcs_chr1;BAPLcs_chr1;BAPLcs_chr1;BAPLcs_chr1	173975;173975;179760;179760;230660;230660;230660;232237;232237;232237;232754;232754;232754;235983;235983;235983;246170;246170;259206;278345	174019;174019;179792;179792;230713;230713;230713;232334;232334;232334;232814;232814;232814;236059;236090;236059;246220;246220;259245;278471	+;+;+;+;+;+;+;+;+;+;+;+;+;+;+;+;+;+;+;+	617	98	85	81	350	244	358
CSbapl.11	BAPLcs_chr1	268705	269229	-	525	4	1	3	22	3	71
CSbapl.12	BAPLcs_chr1	282115	282783	+	669	7	4	7	12	22	14
CSbapl.25	BAPLcs_chr1	347566	348705	-	1140	0	0	0	1	2	2
CSbapl.28	BAPLcs_chr1	369060	369389	-	330	1	0	0	0	0	0
CSbapl.29	BAPLcs_chr1	396956	397747	+	792	0	5	0	1	0	0
CSbapl.31	BAPLcs_chr1;BAPLcs_chr1;BAPLcs_chr1;BAPLcs_chr1;BAPLcs_chr1;BAPLcs_chr1;BAPLcs_chr1;BAPLcs_chr1;BAPLcs_chr1;BAPLcs_chr1;BAPLcs_chr1;BAPLcs_chr1;BAPLcs_chr1;BAPLcs_chr1;BAPLcs_chr1;BAPLcs_chr1;BAPLcs_chr1;BAPLcs_chr1	428818;428818;428818;433024;433024;433024;439312;439312;439312;455768;455768;455768;460596;460596;460596;465044;465044;500015	429854;429854;429854;433065;433065;433065;439561;439561;439561;455880;455880;455880;460788;460788;460788;465145;465145;500137	+;+;+;+;+;+;+;+;+;+;+;+;+;+;+;+;+;+	1860	1100	648	953	486	457	583
CSbapl.33	BAPLcs_chr1	521932	522960	-	1029	15	199	73	37014	23928	40329
CSbapl.36	BAPLcs_chr1;BAPLcs_chr1;BAPLcs_chr1;BAPLcs_chr1;BAPLcs_chr1;BAPLcs_chr1;BAPLcs_chr1;BAPLcs_chr1	561132;561132;561132;564233;568007;568007;568007;613108	562228;562228;562228;564307;568226;568211;568227;613127	-;-;-;-;-;-;-;-	1413	485	417	373	465	470	402
CSbapl.37	BAPLcs_chr1;BAPLcs_chr1;BAPLcs_chr1;BAPLcs_chr1;BAPLcs_chr1;BAPLcs_chr1;BAPLcs_chr1;BAPLcs_chr1;BAPLcs_chr1;BAPLcs_chr1;BAPLcs_chr1;BAPLcs_chr1;BAPLcs_chr1;BAPLcs_chr1	613638;613638;629430;629430;635099;635099;636582;636597;638599;638599;639449;639449;651324;651324	613713;613713;629524;629524;635180;635180;636752;636752;638777;638777;639543;639543;651381;651381	+;+;+;+;+;+;+;+;+;+;+;+;+;+	756	2010	1837	1583	2882	4524	4620
CSbapl.41	BAPLcs_chr1	674215	674628	-	414	0	2	0	0	0	0
CSbapl.42	BAPLcs_chr1	675780	676802	-	1023	0	0	1	0	0	0
CSbapl.48	BAPLcs_chr1;BAPLcs_chr1;BAPLcs_chr1;BAPLcs_chr1;BAPLcs_chr1;BAPLcs_chr1;BAPLcs_chr1;BAPLcs_chr1;BAPLcs_chr1;BAPLcs_chr1;BAPLcs_chr1;BAPLcs_chr1;BAPLcs_chr1;BAPLcs_chr1;BAPLcs_chr1;BAPLcs_chr1;BAPLcs_chr1;BAPLcs_chr1;BAPLcs_chr1;BAPLcs_chr1;BAPLcs_chr1	734230;734230;734230;739262;739262;739262;740775;740775;740775;751673;751673;751673;767008;767008;767008;769079;769079;769079;780120;780120;780120	734301;734301;734301;739449;739449;739449;740954;740954;740954;751736;751736;751736;767111;767111;767111;769173;769173;769173;780196;780196;780196	+;+;+;+;+;+;+;+;+;+;+;+;+;+;+;+;+;+;+;+;+	780	76	123	79	224	218	182
CSbapl.49	BAPLcs_chr1	792078	792536	-	459	0	0	0	5	0	0
CSbapl.50	BAPLcs_chr1	800862	801230	+	369	0	6	2	3	2	0
CSbapl.52	BAPLcs_chr1	814914	815693	-	780	0	0	0	1	2	0
CSbapl.53	BAPLcs_chr1	815962	816624	-	663	0	0	0	2	0	0
CSbapl.56	BAPLcs_chr1	860742	861275	-	534	0	7	2	28	32	39
CSbapl.68	BAPLcs_chr1	979906	981234	+	1329	6	4	4	64	27	30
CSbapl.70	BAPLcs_chr1;BAPLcs_chr1;BAPLcs_chr1;BAPLcs_chr1	987202;987825;988311;989221	987522;987948;988937;989315	-;-;-;-	1167	0	33	4	415	266	367
CSbapl.71	BAPLcs_chr1	993254	993721	+	468	0	0	0	188	35	40
CSbapl.72	BAPLcs_chr1	994379	994846	+	468	0	0	0	157	23	36
CSbapl.73	BAPLcs_chr1;BAPLcs_chr1;BAPLcs_chr1;BAPLcs_chr1;BAPLcs_chr1;BAPLcs_chr1;BAPLcs_chr1;BAPLcs_chr1;BAPLcs_chr1;BAPLcs_chr1;BAPLcs_chr1;BAPLcs_chr1;BAPLcs_chr1	1004922;1015688;1017882;1036612;1055492;1068204;1071750;1073760;1074420;1084038;1087052;1099316;1104818	1004987;1015860;1017975;1036727;1055631;1068366;1071919;1073819;1074502;1084112;1087171;1099492;1104892	+;+;+;+;+;+;+;+;+;+;+;+;+	1512	150	83	104	266	350	296
CSbapl.82	BAPLcs_chr1	1119775	1120110	-	336	0	0	0	1	0	0
CSbapl.85	BAPLcs_chr1	1142039	1143088	-	1050	0	2	0	0	0	1
CSbapl.86	BAPLcs_chr1	1153291	1153665	+	375	108	228	76	76	63	80
CSbapl.87	BAPLcs_chr1;BAPLcs_chr1;BAPLcs_chr1;BAPLcs_chr1;BAPLcs_chr1;BAPLcs_chr1;BAPLcs_chr1;BAPLcs_chr1;BAPLcs_chr1;BAPLcs_chr1;BAPLcs_chr1;BAPLcs_chr1;BAPLcs_chr1;BAPLcs_chr1;BAPLcs_chr1;BAPLcs_chr1;BAPLcs_chr1;BAPLcs_chr1;BAPLcs_chr1;BAPLcs_chr1;BAPLcs_chr1;BAPLcs_chr1;BAPLcs_chr1;BAPLcs_chr1;BAPLcs_chr1;BAPLcs_chr1	1155747;1155747;1157879;1157879;1161105;1161105;1164294;1164294;1164748;1164748;1171063;1171063;1171953;1171953;1172530;1172530;1174168;1174168;1174986;1174986;1176024;1176024;1179592;1179592;1182866;1183872	1156666;1156666;1157956;1157956;1161185;1161185;1164423;1164423;1164824;1164824;1171176;1171176;1172093;1172093;1172651;1172651;1174316;1174316;1175233;1175233;1176089;1176089;1179619;1179619;1182919;1183874	-;-;-;-;-;-;-;-;-;-;-;-;-;-;-;-;-;-;-;-;-;-;-;-;-;-	2211	233	503	133	227	174	170
CSbapl.91	BAPLcs_chr1;BAPLcs_chr1;BAPLcs_chr1;BAPLcs_chr1;BAPLcs_chr1;BAPLcs_chr1;BAPLcs_chr1;BAPLcs_chr1;BAPLcs_chr1;BAPLcs_chr1;BAPLcs_chr1;BAPLcs_chr1;BAPLcs_chr1;BAPLcs_chr1;BAPLcs_chr1;BAPLcs_chr1;BAPLcs_chr1;BAPLcs_chr1;BAPLcs_chr1;BAPLcs_chr1;BAPLcs_chr1;BAPLcs_chr1;BAPLcs_chr1;BAPLcs_chr1;BAPLcs_chr1;BAPLcs_chr1;BAPLcs_chr1;BAPLcs_chr1;BAPLcs_chr1;BAPLcs_chr1;BAPLcs_chr1;BAPLcs_chr1;BAPLcs_chr1;BAP…	1216377;1216377;1220002;1220002;1236498;1236498;1241883;1241883;1246257;1246257;1259227;1259227;1261029;1261029;1271988;1271988;1273300;1273300;1289687;1289687;1306032;1306032;1307637;1307637;1309913;1309913;1324514;1324514;1372745;1372745;1378688;1378688;1387231;1387231;1391362;1391854;1397032;1435743;1436158;1443471;1455381;1460755	1216466;1216466;1220154;1220154;1236605;1236605;1242060;1242060;1246357;1246357;1259408;1259408;1261140;1261140;1272056;1272056;1273440;1273440;1289763;1289763;1306134;1306134;1307866;1307866;1310049;1310049;1324687;1324687;1372800;1372800;1378857;1378857;1387342;1387342;1391397;1391990;1397132;1435819;1436217;1443584;1455465;1460789	-;-;-;-;-;-;-;-;-;-;-;-;-;-;-;-;-;-;-;-;-;-;-;-;-;-;-;-;-;-;-;-;-;-;-;-;-;-;-;-;-;-	2838	1765	1490	1643	742	1313	1173
CSbapl.92	BAPLcs_chr1	1481484	1482080	-	597	3	6	7	7	6	8
CSbapl.96	BAPLcs_chr1	1510226	1510648	+	423	0	0	0	1	0	2
CSbapl.97	BAPLcs_chr1	1511419	1512147	+	729	2	1	0	0	8	10
CSbapl.98	BAPLcs_chr1	1514499	1514882	+	384	0	0	0	2	3	3
CSbapl.99	BAPLcs_chr1;BAPLcs_chr1;BAPLcs_chr1;BAPLcs_chr1;BAPLcs_chr1;BAPLcs_chr1;BAPLcs_chr1;BAPLcs_chr1	1516477;1527713;1542959;1542959;1565035;1565035;1567692;1567692	1516960;1527758;1543095;1543095;1565148;1565148;1567877;1567877	+;+;+;+;+;+;+;+	967	21	14	7	37	50	60
CSbapl.101	BAPLcs_chr1;BAPLcs_chr1	1520539;1521025	1520700;1521264	-;-	402	0	1	0	2	2	1
CSbapl.108	BAPLcs_chr1	1606905	1607318	+	414	0	7	5	2	0	1
CSbapl.109	BAPLcs_chr1	1609022	1609339	+	318	4	2	7	7	0	1
CSbapl.110	BAPLcs_chr1	1610879	1611346	+	468	2	4	2	1	6	0
CSbapl.111	BAPLcs_chr1	1614885	1615613	+	729	0	0	0	4	2	0
CSbapl.113	BAPLcs_chr1	1617381	1618412	+	1032	1	0	1	0	0	1
CSbapl.115	BAPLcs_chr1	1620753	1621556	+	804	0	0	0	2	0	0
CSbapl.116	BAPLcs_chr1	1622265	1622822	+	558	0	4	2	2	3	4
CSbapl.117	BAPLcs_chr1	1628223	1631216	-	2994	2	0	4	8	4	11
CSbapl.118	BAPLcs_chr1;BAPLcs_chr1;BAPLcs_chr1;BAPLcs_chr1	1638900;1640962;1641983;1643190	1639639;1641462;1642110;1643575	-;-;-;-	1755	0	12	4	17	15	9
CSbapl.119	BAPLcs_chr1	1644975	1646483	+	1509	2	2	2	6	2	0
CSbapl.120	BAPLcs_chr1;BAPLcs_chr1;BAPLcs_chr1;BAPLcs_chr1;BAPLcs_chr1;BAPLcs_chr1;BAPLcs_chr1;BAPLcs_chr1;BAPLcs_chr1;BAPLcs_chr1;BAPLcs_chr1;BAPLcs_chr1;BAPLcs_chr1;BAPLcs_chr1;BAPLcs_chr1;BAPLcs_chr1;BAPLcs_chr1;BAPLcs_chr1;BAPLcs_chr1;BAPLcs_chr1;BAPLcs_chr1;BAPLcs_chr1;BAPLcs_chr1;BAPLcs_chr1;BAPLcs_chr1;BAPLcs_chr1	1648778;1648778;1648778;1662686;1662686;1662686;1672064;1672064;1672064;1687314;1687314;1693315;1693315;1693315;1707915;1707915;1707915;1716784;1716784;1716784;1727582;1727582;1727582;1744416;1744416;1744419	1648802;1648802;1648802;1662894;1662894;1662894;1672127;1672127;1672127;1687439;1687439;1693479;1693479;1693479;1708009;1708009;1708009;1716988;1716988;1716988;1727740;1727740;1727740;1744525;1744525;1744525	+;+;+;+;+;+;+;+;+;+;+;+;+;+;+;+;+;+;+;+;+;+;+;+;+;+	1158	935	840	858	2983	2803	4146
CSbapl.122	BAPLcs_chr1	1778438	1779247	-	810	2	4	2	8	13	17
CSbapl.124	BAPLcs_chr1;BAPLcs_chr1;BAPLcs_chr1;BAPLcs_chr1;BAPLcs_chr1;BAPLcs_chr1;BAPLcs_chr1;BAPLcs_chr1;BAPLcs_chr1;BAPLcs_chr1;BAPLcs_chr1;BAPLcs_chr1;BAPLcs_chr1;BAPLcs_chr1;BAPLcs_chr1;BAPLcs_chr1;BAPLcs_chr1;BAPLcs_chr1;BAPLcs_chr1;BAPLcs_chr1;BAPLcs_chr1;BAPLcs_chr1;BAPLcs_chr1;BAPLcs_chr1;BAPLcs_chr1;BAPLcs_chr1;BAPLcs_chr1;BAPLcs_chr1;BAPLcs_chr1;BAPLcs_chr1;BAPLcs_chr1;BAPLcs_chr1;BAPLcs_chr1;BAP…	1785351;1785351;1797511;1797511;1803850;1803850;1805903;1805903;1813210;1813210;1813916;1813916;1817485;1817485;1821867;1821867;1824884;1824884;1827487;1827487;1843049;1849485;1849485;1851573;1851573;1866994;1866994;1894826;1894826;1894826;1894826;1908731;1908731;1908731;1908731;1921177;1921177;1921177;1921177;1924622;1924622;1924622;1924622;1932712;1932712;1932712;1940118;1940968;1940968;1940968…	1785497;1785497;1797603;1797603;1804002;1804002;1805951;1805951;1813313;1813313;1814042;1814042;1817584;1817584;1821932;1821932;1825146;1825146;1827552;1827552;1843237;1849662;1849662;1851682;1851682;1867184;1867184;1894907;1894907;1894907;1894907;1908846;1908846;1908846;1908846;1921226;1921226;1921226;1921226;1924676;1924676;1924676;1924676;1932824;1932824;1932824;1940224;1941136;1941136;1941136…	+;+;+;+;+;+;+;+;+;+;+;+;+;+;+;+;+;+;+;+;+;+;+;+;+;+;+;+;+;+;+;+;+;+;+;+;+;+;+;+;+;+;+;+;+;+;+;+;+;+;+;+;+;+;+;+;+;+;+;+;+;+;+;+;+;+;+;+;+;+;+;+;+;+;+;+;+;+;+;+;+;+;+;+;+;+;+;+;+;+;+;+;+;+;+;+;+;+;+;+;+;+;+;+;+;+;+;+;+;+;+;+;+;+;+;+;+;+;+;+;+;+;+;+;+;+;+;+;+;+;+;+;+;+;+;+;+;+;+;+;+;+;+	6862	2139	2194	1699	5202	4263	5289
CSbapl.125	BAPLcs_chr1	2104750	2105118	-	369	0	6	0	5	8	0
CSbapl.127	BAPLcs_chr1	2188246	2189445	-	1200	5	2	0	26	0	2
CSbapl.130	BAPLcs_chr1;BAPLcs_chr1;BAPLcs_chr1;BAPLcs_chr1;BAPLcs_chr1;BAPLcs_chr1;BAPLcs_chr1;BAPLcs_chr1;BAPLcs_chr1;BAPLcs_chr1;BAPLcs_chr1;BAPLcs_chr1;BAPLcs_chr1;BAPLcs_chr1;BAPLcs_chr1;BAPLcs_chr1;BAPLcs_chr1;BAPLcs_chr1;BAPLcs_chr1;BAPLcs_chr1;BAPLcs_chr1;BAPLcs_chr1;BAPLcs_chr1;BAPLcs_chr1;BAPLcs_chr1;BAPLcs_chr1;BAPLcs_chr1;BAPLcs_chr1;BAPLcs_chr1;BAPLcs_chr1;BAPLcs_chr1;BAPLcs_chr1;BAPLcs_chr1;BAP…	2285089;2285089;2286779;2286779;2290312;2290312;2307267;2307267;2313839;2313869;2313869;2313887;2320143;2320143;2320143;2320143;2323203;2323203;2323203;2323203;2337566;2337566;2337566;2337566;2339639;2339639;2339639;2339639;2359710;2359710;2362616;2362616;2362616;2362616;2364014;2364014;2364014;2364014;2366989;2366989;2366989;2375332;2375332;2375332;2375332;2375922;2375922;2375922;2376977;2376977…	2285242;2285242;2286853;2286853;2290445;2290445;2307347;2307347;2313951;2313951;2313951;2313951;2320314;2320314;2320314;2320314;2323306;2323306;2323306;2323306;2337764;2337764;2337764;2337764;2339663;2339663;2339663;2339663;2359739;2359739;2362725;2362725;2362725;2362725;2364116;2364116;2364116;2364116;2367101;2367101;2367101;2375420;2375333;2375420;2375420;2376018;2376018;2376018;2377103;2377103…	-;-;-;-;-;-;-;-;-;-;-;-;-;-;-;-;-;-;-;-;-;-;-;-;-;-;-;-;-;-;-;-;-;-;-;-;-;-;-;-;-;-;-;-;-;-;-;-;-;-;-;-;-;-;-;-;-	1986	33	77	17	245	167	143
CSbapl.131	BAPLcs_chr1;BAPLcs_chr1;BAPLcs_chr1;BAPLcs_chr1;BAPLcs_chr1;BAPLcs_chr1;BAPLcs_chr1	2423155;2424975;2431301;2442758;2444408;2445201;2446621	2423261;2425110;2431458;2442932;2444506;2445266;2446980	+;+;+;+;+;+;+	1101	0	2	1	0	44	24
CSbapl.135	BAPLcs_chr1;BAPLcs_chr1;BAPLcs_chr1;BAPLcs_chr1;BAPLcs_chr1;BAPLcs_chr1;BAPLcs_chr1;BAPLcs_chr1;BAPLcs_chr1;BAPLcs_chr1;BAPLcs_chr1;BAPLcs_chr1;BAPLcs_chr1;BAPLcs_chr1;BAPLcs_chr1;BAPLcs_chr1;BAPLcs_chr1;BAPLcs_chr1;BAPLcs_chr1;BAPLcs_chr1;BAPLcs_chr1;BAPLcs_chr1;BAPLcs_chr1;BAPLcs_chr1;BAPLcs_chr1;BAPLcs_chr1;BAPLcs_chr1;BAPLcs_chr1;BAPLcs_chr1;BAPLcs_chr1;BAPLcs_chr1;BAPLcs_chr1;BAPLcs_chr1;BAP…	2466754;2481374;2481381;2491719;2491719;2497023;2497023;2501281;2501281;2502566;2502566;2535251;2535251;2535253;2535253;2538800;2538800;2538800;2538800;2539688;2539688;2539688;2539688;2541754;2541754;2541754;2541754;2546849;2546849;2546849;2546849;2549629;2549629;2549629;2549629;2558004;2558004;2558004;2558004	2466805;2481490;2481490;2491770;2491770;2497081;2497081;2501348;2501348;2502609;2502609;2535359;2535359;2535359;2535359;2538935;2538935;2538935;2538935;2539845;2539845;2539845;2539845;2541934;2541934;2541934;2541934;2546947;2546947;2546947;2546947;2549694;2549694;2549694;2549694;2558276;2558276;2558276;2558276	+;+;+;+;+;+;+;+;+;+;+;+;+;+;+;+;+;+;+;+;+;+;+;+;+;+;+;+;+;+;+;+;+;+;+;+;+;+;+	1414	71	149	47	176	221	247
CSbapl.143	BAPLcs_chr1;BAPLcs_chr1;BAPLcs_chr1;BAPLcs_chr1;BAPLcs_chr1;BAPLcs_chr1;BAPLcs_chr1;BAPLcs_chr1;BAPLcs_chr1;BAPLcs_chr1;BAPLcs_chr1;BAPLcs_chr1;BAPLcs_chr1;BAPLcs_chr1;BAPLcs_chr1;BAPLcs_chr1;BAPLcs_chr1;BAPLcs_chr1;BAPLcs_chr1;BAPLcs_chr1;BAPLcs_chr1;BAPLcs_chr1;BAPLcs_chr1;BAPLcs_chr1;BAPLcs_chr1;BAPLcs_chr1;BAPLcs_chr1;BAPLcs_chr1;BAPLcs_chr1;BAPLcs_chr1;BAPLcs_chr1;BAPLcs_chr1	2577283;2577283;2604905;2604905;2608168;2610265;2610265;2610265;2616944;2616944;2616944;2626877;2626877;2626877;2631655;2631655;2631655;2644236;2644236;2644236;2648206;2648206;2648206;2666733;2666733;2666733;2669054;2669054;2669054;2674874;2674874;2674874	2577325;2577325;2605017;2605017;2608224;2610380;2610380;2610380;2617083;2617083;2617083;2627000;2627000;2627000;2631884;2631884;2631884;2644575;2644575;2644575;2648790;2648790;2648790;2666860;2666860;2666860;2669202;2669202;2669202;2675113;2675113;2675113	-;-;-;-;-;-;-;-;-;-;-;-;-;-;-;-;-;-;-;-;-;-;-;-;-;-;-;-;-;-;-;-	2265	53	112	50	327	230	330
CSbapl.151	BAPLcs_chr1	2836672	2837094	+	423	0	0	0	1	0	0
CSbapl.152	BAPLcs_chr1	2847099	2848181	+	1083	6	8	2	19	10	10
CSbapl.154	BAPLcs_chr1	2856760	2857146	-	387	0	0	0	0	3	0
CSbapl.156	BAPLcs_chr1;BAPLcs_chr1;BAPLcs_chr1;BAPLcs_chr1;BAPLcs_chr1;BAPLcs_chr1	2939402;2951349;2954363;2955521;2957661;2959104	2939491;2951468;2954692;2955620;2957719;2959223	+;+;+;+;+;+	819	30	68	14	70	53	97
CSbapl.158	BAPLcs_chr1;BAPLcs_chr1	2978280;2978838	2979839;2979839	+;+	1560	34	48	60	78	87	78
CSbapl.160	BAPLcs_chr1	3016931	3018241	-	1311	1	0	2	10	2	17
CSbapl.162	BAPLcs_chr1;BAPLcs_chr1	3073705;3075623	3073941;3075703	-;-	318	50	59	57	35	36	45
CSbapl.165	BAPLcs_chr1;BAPLcs_chr1;BAPLcs_chr1;BAPLcs_chr1;BAPLcs_chr1;BAPLcs_chr1;BAPLcs_chr1;BAPLcs_chr1;BAPLcs_chr1;BAPLcs_chr1;BAPLcs_chr1;BAPLcs_chr1;BAPLcs_chr1;BAPLcs_chr1;BAPLcs_chr1;BAPLcs_chr1;BAPLcs_chr1;BAPLcs_chr1;BAPLcs_chr1;BAPLcs_chr1;BAPLcs_chr1;BAPLcs_chr1;BAPLcs_chr1;BAPLcs_chr1;BAPLcs_chr1	3182010;3184813;3186768;3186768;3186944;3188495;3188495;3188495;3188508;3194179;3194179;3194741;3194741;3195151;3195237;3195237;3195237;3195237;3196611;3196611;3196611;3210894;3210894;3210894;3210894	3182182;3184938;3187162;3187162;3187162;3188680;3188680;3188680;3188680;3194261;3194261;3194807;3194807;3195398;3195398;3195398;3195398;3195398;3196733;3196713;3196733;3211092;3211092;3211092;3211092	-;-;-;-;-;-;-;-;-;-;-;-;-;-;-;-;-;-;-;-;-;-;-;-;-	1600	48	83	11	20	62	34
CSbapl.167	BAPLcs_chr1;BAPLcs_chr1	3224428;3234327	3230193;3234407	-;-	5847	4	4	2	44	10	24
CSbapl.168	BAPLcs_chr1;BAPLcs_chr1;BAPLcs_chr1;BAPLcs_chr1;BAPLcs_chr1;BAPLcs_chr1;BAPLcs_chr1;BAPLcs_chr1;BAPLcs_chr1;BAPLcs_chr1;BAPLcs_chr1	3247007;3256264;3256841;3258128;3259568;3260644;3261450;3265562;3266762;3269538;3271128	3247049;3256305;3256962;3258264;3259683;3260747;3261905;3265979;3267101;3269624;3271407	+;+;+;+;+;+;+;+;+;+;+	2145	284	344	305	601	776	786
CSbapl.175	BAPLcs_chr1	3349883	3353026	+	3144	4	0	1	4	129	19
CSbapl.176	BAPLcs_chr1	3356170	3357006	+	837	0	0	3	59	46	91
CSbapl.177	BAPLcs_chr1;BAPLcs_chr1	3366409;3373310	3366444;3375019	+;+	1746	59	54	72	137	209	289
CSbapl.179	BAPLcs_chr1	3416174	3417025	-	852	0	0	1	0	3	0
CSbapl.180	BAPLcs_chr1;BAPLcs_chr1;BAPLcs_chr1;BAPLcs_chr1;BAPLcs_chr1;BAPLcs_chr1;BAPLcs_chr1;BAPLcs_chr1;BAPLcs_chr1;BAPLcs_chr1;BAPLcs_chr1;BAPLcs_chr1;BAPLcs_chr1;BAPLcs_chr1;BAPLcs_chr1;BAPLcs_chr1;BAPLcs_chr1;BAPLcs_chr1;BAPLcs_chr1;BAPLcs_chr1;BAPLcs_chr1;BAPLcs_chr1;BAPLcs_chr1;BAPLcs_chr1;BAPLcs_chr1;BAPLcs_chr1;BAPLcs_chr1;BAPLcs_chr1;BAPLcs_chr1;BAPLcs_chr1;BAPLcs_chr1;BAPLcs_chr1;BAPLcs_chr1;BAP…	3419090;3419090;3426444;3426444;3427071;3427071;3428233;3428233;3429058;3429058;3429348;3429348;3429861;3429861;3430398;3430398;3431669;3431669;3433567;3433567;3434334;3434334;3443962;3443962;3444689;3444689;3463442;3463442;3464567;3464567;3465263;3465263;3465569;3465569;3472663;3472663;3473017;3473017;3474505;3474505;3475459;3475459;3475818;3475818;3476775;3476775;3477536;3477536;3478783;3478783…	3419380;3419380;3426643;3426643;3427398;3427398;3428435;3428435;3429145;3429145;3429441;3429441;3430111;3430111;3430582;3430582;3431831;3431831;3433899;3433899;3443654;3443654;3444178;3444178;3444923;3444923;3463699;3463699;3464824;3464824;3465407;3465407;3465830;3465830;3472845;3472845;3473360;3473360;3475080;3475080;3475608;3475608;3475991;3475991;3476940;3476940;3477782;3477782;3478978;3478978…	-;-;-;-;-;-;-;-;-;-;-;-;-;-;-;-;-;-;-;-;-;-;-;-;-;-;-;-;-;-;-;-;-;-;-;-;-;-;-;-;-;-;-;-;-;-;-;-;-;-;-;-;-;-;-;-;-;-;-	16365	4421	4590	2793	4382	1639	3182
CSbapl.187	BAPLcs_chr1;BAPLcs_chr1;BAPLcs_chr1;BAPLcs_chr1;BAPLcs_chr1;BAPLcs_chr1;BAPLcs_chr1;BAPLcs_chr1;BAPLcs_chr1;BAPLcs_chr1;BAPLcs_chr1;BAPLcs_chr1;BAPLcs_chr1;BAPLcs_chr1;BAPLcs_chr1;BAPLcs_chr1;BAPLcs_chr1;BAPLcs_chr1;BAPLcs_chr1;BAPLcs_chr1;BAPLcs_chr1;BAPLcs_chr1;BAPLcs_chr1;BAPLcs_chr1;BAPLcs_chr1;BAPLcs_chr1;BAPLcs_chr1;BAPLcs_chr1;BAPLcs_chr1;BAPLcs_chr1;BAPLcs_chr1;BAPLcs_chr1;BAPLcs_chr1;BAP…	3590369;3590369;3590369;3590378;3598570;3598570;3598570;3598570;3599681;3599681;3599681;3599681;3608548;3608548;3608548;3608548;3612607;3612607;3612607;3612607;3624162;3624162;3624162;3624162;3625486;3625486;3625486;3625486;3631555;3631555;3631555;3631555;3635220;3635220;3635220;3635220;3636031;3636031;3636031;3636031;3640310;3640310;3640310;3640310;3641432;3641432;3641432;3641432;3650467;3650467…	3590662;3590662;3590662;3590662;3598728;3598728;3598728;3598728;3599742;3599742;3599742;3599742;3608656;3608656;3608656;3608656;3612767;3612767;3612767;3612767;3624320;3624320;3624320;3624320;3625624;3625624;3625624;3625624;3631666;3631666;3631666;3631666;3635379;3635379;3635379;3635379;3636148;3636148;3636148;3636148;3640482;3640482;3640479;3640482;3641518;3641518;3641518;3641518;3650541;3650541…	-;-;-;-;-;-;-;-;-;-;-;-;-;-;-;-;-;-;-;-;-;-;-;-;-;-;-;-;-;-;-;-;-;-;-;-;-;-;-;-;-;-;-;-;-;-;-;-;-;-;-;-;-;-;-;-;-	2202	1480	1897	1189	524	809	891
CSbapl.188	BAPLcs_chr1;BAPLcs_chr1;BAPLcs_chr1;BAPLcs_chr1;BAPLcs_chr1;BAPLcs_chr1;BAPLcs_chr1;BAPLcs_chr1;BAPLcs_chr1;BAPLcs_chr1;BAPLcs_chr1;BAPLcs_chr1;BAPLcs_chr1;BAPLcs_chr1;BAPLcs_chr1;BAPLcs_chr1;BAPLcs_chr1;BAPLcs_chr1;BAPLcs_chr1;BAPLcs_chr1;BAPLcs_chr1;BAPLcs_chr1;BAPLcs_chr1;BAPLcs_chr1;BAPLcs_chr1;BAPLcs_chr1;BAPLcs_chr1;BAPLcs_chr1;BAPLcs_chr1;BAPLcs_chr1;BAPLcs_chr1;BAPLcs_chr1;BAPLcs_chr1;BAP…	3664757;3664757;3664757;3664757;3664757;3675276;3675276;3675276;3675276;3675276;3675411;3676658;3676658;3676658;3676658;3676658;3676672;3689295;3689295;3689295;3689295;3689295;3689295;3700246;3700246;3700246;3700246;3700246;3700246;3704034;3704034;3704034;3704034;3704034;3704034;3706326;3706326;3706326;3706326;3706326;3706326;3715107;3715107;3715107;3715107;3715107;3715107;3726653;3726653;3726653…	3664841;3664841;3664841;3664841;3664841;3675424;3675424;3675424;3675424;3675424;3675424;3676798;3676798;3676798;3676798;3676798;3676798;3689384;3689384;3689384;3689384;3689384;3689384;3700374;3700374;3700374;3700374;3700374;3700374;3704228;3704228;3704228;3704228;3704228;3704228;3706698;3706698;3706698;3706698;3706698;3706698;3715249;3715249;3715249;3715249;3715249;3715249;3727465;3727465;3727465…	+;+;+;+;+;+;+;+;+;+;+;+;+;+;+;+;+;+;+;+;+;+;+;+;+;+;+;+;+;+;+;+;+;+;+;+;+;+;+;+;+;+;+;+;+;+;+;+;+;+;+;+;+	2118	133	206	80	186	215	196
CSbapl.190	BAPLcs_chr1;BAPLcs_chr1;BAPLcs_chr1;BAPLcs_chr1;BAPLcs_chr1;BAPLcs_chr1;BAPLcs_chr1;BAPLcs_chr1;BAPLcs_chr1;BAPLcs_chr1;BAPLcs_chr1;BAPLcs_chr1;BAPLcs_chr1;BAPLcs_chr1;BAPLcs_chr1;BAPLcs_chr1;BAPLcs_chr1;BAPLcs_chr1;BAPLcs_chr1;BAPLcs_chr1;BAPLcs_chr1;BAPLcs_chr1;BAPLcs_chr1;BAPLcs_chr1;BAPLcs_chr1;BAPLcs_chr1;BAPLcs_chr1;BAPLcs_chr1;BAPLcs_chr1;BAPLcs_chr1;BAPLcs_chr1;BAPLcs_chr1;BAPLcs_chr1;BAP…	3748195;3757134;3766378;3771924;3772569;3776082;3781429;3799137;3810285;3810658;3812306;3814298;3815250;3817212;3819251;3822323;3825406;3847777;3851219;3858272;3861286;3863192;3867574;3868704;3869362;3870350;3876250;3883113;3884739;3889688;3890818;3891477;3892465;3896124;3896759;3914528;3917018	3748320;3757191;3766523;3771981;3773374;3776243;3781512;3799220;3810417;3810711;3812397;3814383;3815387;3817263;3819370;3822376;3825459;3847851;3851316;3858388;3861386;3863259;3867646;3868773;3869474;3870402;3876491;3883213;3884806;3889760;3890887;3891589;3892517;3896240;3896881;3914594;3917064	-;-;-;-;-;-;-;-;-;-;-;-;-;-;-;-;-;-;-;-;-;-;-;-;-;-;-;-;-;-;-;-;-;-;-;-;-	4149	1	0	0	0	0	11
CSbapl.199	BAPLcs_chr1	4014542	4014856	+	315	0	0	0	1	0	0
CSbapl.204	BAPLcs_chr1	4063105	4063737	-	633	1	3	0	13	17	11
CSbapl.206	BAPLcs_chr1;BAPLcs_chr1;BAPLcs_chr1;BAPLcs_chr1;BAPLcs_chr1;BAPLcs_chr1;BAPLcs_chr1;BAPLcs_chr1;BAPLcs_chr1;BAPLcs_chr1;BAPLcs_chr1;BAPLcs_chr1;BAPLcs_chr1;BAPLcs_chr1;BAPLcs_chr1;BAPLcs_chr1;BAPLcs_chr1;BAPLcs_chr1;BAPLcs_chr1;BAPLcs_chr1;BAPLcs_chr1;BAPLcs_chr1;BAPLcs_chr1;BAPLcs_chr1;BAPLcs_chr1;BAPLcs_chr1;BAPLcs_chr1;BAPLcs_chr1;BAPLcs_chr1	4066303;4068640;4071811;4074822;4075059;4086266;4086374;4087966;4087966;4094488;4094488;4102663;4102663;4105456;4105456;4115308;4115308;4116378;4116378;4137176;4137176;4149793;4149793;4151494;4151494;4152406;4152406;4155916;4155916	4066410;4068702;4071885;4074870;4075255;4086398;4086398;4088261;4088261;4094683;4094683;4102886;4102886;4105570;4105570;4115487;4115487;4116536;4116536;4137344;4137344;4149943;4149943;4151749;4151749;4152502;4152502;4156288;4156288	+;+;+;+;+;+;+;+;+;+;+;+;+;+;+;+;+;+;+;+;+;+;+;+;+;+;+;+;+	2841	32	54	14	591	541	733
CSbapl.220	BAPLcs_chr1;BAPLcs_chr1;BAPLcs_chr1;BAPLcs_chr1;BAPLcs_chr1;BAPLcs_chr1;BAPLcs_chr1;BAPLcs_chr1;BAPLcs_chr1;BAPLcs_chr1;BAPLcs_chr1;BAPLcs_chr1;BAPLcs_chr1;BAPLcs_chr1;BAPLcs_chr1;BAPLcs_chr1;BAPLcs_chr1	4246466;4246466;4249712;4249712;4255444;4255444;4257273;4257273;4264366;4264366;4269177;4269177;4281921;4286099;4286099;4290965;4290965	4246890;4246890;4249915;4249915;4255524;4255524;4257384;4257384;4264521;4264521;4269353;4269353;4282031;4286221;4286221;4291810;4291810	-;-;-;-;-;-;-;-;-;-;-;-;-;-;-;-;-	2235	282	322	204	414	416	423
CSbapl.225	BAPLcs_chr1;BAPLcs_chr1;BAPLcs_chr1;BAPLcs_chr1;BAPLcs_chr1;BAPLcs_chr1;BAPLcs_chr1;BAPLcs_chr1	4326835;4326835;4339272;4339272;4339283;4342103;4342103;4342103	4326898;4326898;4339386;4339386;4339386;4342295;4342295;4342295	+;+;+;+;+;+;+;+	372	0	1	0	3	3	20
CSbapl.226	BAPLcs_chr1;BAPLcs_chr1;BAPLcs_chr1;BAPLcs_chr1;BAPLcs_chr1;BAPLcs_chr1;BAPLcs_chr1;BAPLcs_chr1;BAPLcs_chr1;BAPLcs_chr1;BAPLcs_chr1;BAPLcs_chr1;BAPLcs_chr1;BAPLcs_chr1;BAPLcs_chr1;BAPLcs_chr1;BAPLcs_chr1;BAPLcs_chr1;BAPLcs_chr1;BAPLcs_chr1;BAPLcs_chr1;BAPLcs_chr1;BAPLcs_chr1;BAPLcs_chr1;BAPLcs_chr1;BAPLcs_chr1;BAPLcs_chr1;BAPLcs_chr1;BAPLcs_chr1;BAPLcs_chr1	4365250;4365250;4365250;4365250;4368158;4368158;4368158;4368158;4377740;4377740;4377740;4377740;4378743;4378743;4378743;4378743;4380657;4380657;4380657;4380657;4387427;4387427;4387427;4387427;4412703;4415654;4425074;4426076;4427991;4433644	4365442;4365442;4365442;4365442;4368272;4368272;4368272;4368272;4377998;4377998;4377998;4377998;4378936;4378936;4378936;4378936;4380777;4380777;4380777;4380777;4387528;4387528;4387528;4387528;4412895;4415768;4425332;4426269;4428111;4433745	-;-;-;-;-;-;-;-;-;-;-;-;-;-;-;-;-;-;-;-;-;-;-;-;-;-;-;-;-;-	1968	56	118	63	606	507	635
CSbapl.227	BAPLcs_chr1;BAPLcs_chr1;BAPLcs_chr1;BAPLcs_chr1;BAPLcs_chr1;BAPLcs_chr1;BAPLcs_chr1;BAPLcs_chr1;BAPLcs_chr1;BAPLcs_chr1;BAPLcs_chr1;BAPLcs_chr1;BAPLcs_chr1;BAPLcs_chr1;BAPLcs_chr1;BAPLcs_chr1	4446504;4446504;4448206;4448206;4450322;4450322;4473278;4473278;4478323;4478323;4495746;4495746;4501020;4501020;4506025;4506025	4446585;4446585;4448360;4448360;4450398;4450398;4473403;4473403;4478400;4478400;4495830;4495830;4501093;4501093;4507048;4507048	+;+;+;+;+;+;+;+;+;+;+;+;+;+;+;+	1701	229	215	158	392	358	500
CSbapl.229	BAPLcs_chr1;BAPLcs_chr1	4513230;4513230	4513766;4513766	-;-	537	201	332	179	225	129	229
CSbapl.230	BAPLcs_chr1;BAPLcs_chr1;BAPLcs_chr1;BAPLcs_chr1	4517146;4526724;4528428;4530570	4517211;4526832;4528491;4530666	+;+;+;+	336	167	200	134	507	357	407
CSbapl.232	BAPLcs_chr1;BAPLcs_chr1;BAPLcs_chr1;BAPLcs_chr1;BAPLcs_chr1;BAPLcs_chr1	4535944;4544197;4544706;4546029;4547243;4552868	4536002;4544278;4544867;4546282;4547466;4552929	-;-;-;-;-;-	843	245	206	162	188	470	546
CSbapl.235	BAPLcs_chr1;BAPLcs_chr1;BAPLcs_chr1;BAPLcs_chr1;BAPLcs_chr1;BAPLcs_chr1;BAPLcs_chr1;BAPLcs_chr1;BAPLcs_chr1;BAPLcs_chr1;BAPLcs_chr1;BAPLcs_chr1;BAPLcs_chr1;BAPLcs_chr1;BAPLcs_chr1;BAPLcs_chr1;BAPLcs_chr1;BAPLcs_chr1	4569251;4572914;4573519;4573542;4577996;4577996;4580183;4580183;4582082;4582082;4587218;4587218;4589258;4589258;4590440;4590440;4599636;4599636	4570081;4572969;4573662;4573662;4578106;4578106;4580335;4580335;4582153;4582153;4587450;4587450;4589425;4589425;4590536;4590536;4599809;4599809	-;-;-;-;-;-;-;-;-;-;-;-;-;-;-;-;-;-	2039	20	78	43	57	43	56
CSbapl.236	BAPLcs_chr1	4628980	4629693	-	714	0	0	0	1	3	4
CSbapl.237	BAPLcs_chr1;BAPLcs_chr1;BAPLcs_chr1;BAPLcs_chr1;BAPLcs_chr1;BAPLcs_chr1;BAPLcs_chr1;BAPLcs_chr1;BAPLcs_chr1;BAPLcs_chr1;BAPLcs_chr1;BAPLcs_chr1;BAPLcs_chr1;BAPLcs_chr1;BAPLcs_chr1;BAPLcs_chr1;BAPLcs_chr1;BAPLcs_chr1;BAPLcs_chr1;BAPLcs_chr1;BAPLcs_chr1;BAPLcs_chr1;BAPLcs_chr1;BAPLcs_chr1;BAPLcs_chr1;BAPLcs_chr1;BAPLcs_chr1;BAPLcs_chr1;BAPLcs_chr1;BAPLcs_chr1;BAPLcs_chr1;BAPLcs_chr1;BAPLcs_chr1;BAP…	4638643;4638643;4638643;4640543;4640543;4640543;4645582;4645582;4645582;4647605;4647605;4647605;4648665;4648665;4648665;4650975;4650975;4650975;4652519;4652519;4652519;4675942;4675942;4675942;4677681;4677681;4677681;4679498;4679498;4679498;4687070;4687070;4687070;4688967;4688967;4688967;4690211;4690211;4690211;4696839;4696839;4696839;4697673;4697673;4697673;4698781;4698781;4698781;4700649;4700649…	4638783;4638783;4638783;4640684;4640684;4640684;4645706;4645706;4645706;4647718;4647718;4647718;4648787;4648787;4648787;4651092;4651092;4651092;4652717;4652717;4652717;4676045;4676045;4676045;4677772;4677772;4677772;4679691;4679691;4679691;4687152;4687152;4687152;4689069;4689069;4689069;4690300;4690300;4690300;4696948;4696948;4696948;4697762;4697762;4697762;4698956;4698956;4698956;4700782;4700782…	+;+;+;+;+;+;+;+;+;+;+;+;+;+;+;+;+;+;+;+;+;+;+;+;+;+;+;+;+;+;+;+;+;+;+;+;+;+;+;+;+;+;+;+;+;+;+;+;+;+;+;+;+;+;+;+;+;+;+;+;+;+;+;+;+;+;+;+;+	2703	172	193	121	517	740	704
CSbapl.240	BAPLcs_chr1;BAPLcs_chr1	4736764;4738145	4737302;4738523	-;-	918	265	393	212	167	326	435
CSbapl.242	BAPLcs_chr1;BAPLcs_chr1;BAPLcs_chr1;BAPLcs_chr1	4746707;4747199;4749954;4756415	4746897;4747354;4750088;4756643	-;-;-;-	711	51	111	39	88	162	166
CSbapl.243	BAPLcs_chr1	4751403	4752509	+	1107	2	4	8	2	2	0
CSbapl.244	BAPLcs_chr1;BAPLcs_chr1	4772531;4772531	4773736;4773736	+;+	1206	113	155	95	103	87	77
CSbapl.246	BAPLcs_chr1	4818543	4819283	-	741	0	0	0	0	0	1
CSbapl.259	BAPLcs_chr1	4891031	4892227	+	1197	0	0	0	0	2	0
CSbapl.261	BAPLcs_chr1	4903923	4905200	-	1278	0	0	0	2	0	0
CSbapl.269	BAPLcs_chr1;BAPLcs_chr1	4941107;4943215	4941924;4943248	-;-	852	4	10	4	2	20	2
CSbapl.272	BAPLcs_chr1;BAPLcs_chr1;BAPLcs_chr1;BAPLcs_chr1;BAPLcs_chr1;BAPLcs_chr1;BAPLcs_chr1;BAPLcs_chr1	4975459;4975459;4998774;4998774;5036682;5036682;5038898;5038898	4976587;4976587;4998857;4998857;5036838;5036838;5038964;5038964	+;+;+;+;+;+;+;+	1437	0	11	4	8	7	7
CSbapl.275	BAPLcs_chr1	5031824	5032657	+	834	0	0	1	0	0	0
CSbapl.279	BAPLcs_chr1;BAPLcs_chr1;BAPLcs_chr1	5061064;5061064;5061064	5061972;5061972;5061972	+;+;+	909	5	14	0	12	11	0
CSbapl.281	BAPLcs_chr1;BAPLcs_chr1;BAPLcs_chr1;BAPLcs_chr1;BAPLcs_chr1;BAPLcs_chr1;BAPLcs_chr1	5096545;5096545;5099957;5099957;5105125;5105125;5105811	5097646;5097646;5100040;5100040;5105285;5105281;5105868	+;+;+;+;+;+;+	1405	78	122	30	13	37	35
CSbapl.282	BAPLcs_chr1	5100823	5101224	-	402	0	1	0	0	0	0
CSbapl.286	BAPLcs_chr1;BAPLcs_chr1;BAPLcs_chr1;BAPLcs_chr1;BAPLcs_chr1;BAPLcs_chr1;BAPLcs_chr1;BAPLcs_chr1;BAPLcs_chr1;BAPLcs_chr1;BAPLcs_chr1;BAPLcs_chr1	5119462;5119462;5121121;5121121;5121511;5122619;5168641;5170442;5170841;5170841;5171984;5171984	5120572;5120572;5121204;5121204;5121667;5122667;5169751;5170525;5170997;5170997;5172032;5172032	+;+;+;+;+;+;+;+;+;+;+;+	2802	514	107	128	310	132	100
CSbapl.297	BAPLcs_chr1;BAPLcs_chr1;BAPLcs_chr1;BAPLcs_chr1;BAPLcs_chr1;BAPLcs_chr1;BAPLcs_chr1;BAPLcs_chr1;BAPLcs_chr1;BAPLcs_chr1;BAPLcs_chr1;BAPLcs_chr1;BAPLcs_chr1;BAPLcs_chr1;BAPLcs_chr1;BAPLcs_chr1;BAPLcs_chr1;BAPLcs_chr1;BAPLcs_chr1;BAPLcs_chr1;BAPLcs_chr1;BAPLcs_chr1;BAPLcs_chr1;BAPLcs_chr1;BAPLcs_chr1;BAPLcs_chr1;BAPLcs_chr1;BAPLcs_chr1;BAPLcs_chr1;BAPLcs_chr1;BAPLcs_chr1;BAPLcs_chr1;BAPLcs_chr1;BAP…	5218201;5218201;5227256;5227256;5228305;5228305;5229944;5229944;5231708;5231708;5232878;5232878;5234081;5234081;5238455;5238455;5239189;5239189;5242323;5242323;5243849;5243849;5244546;5244546;5246332;5246332;5252682;5252682;5253321;5253321;5254004;5254004;5254538;5254538;5255881;5255881;5256964;5256964;5259156;5259156;5271425;5271425;5273524;5273524;5274687;5274687;5277025;5277025;5277416;5277416…	5218397;5218397;5227415;5227415;5228403;5228403;5230198;5230198;5231843;5231843;5233079;5233079;5234218;5234218;5238711;5238711;5239401;5239401;5242493;5242493;5244062;5244062;5244729;5244729;5246437;5246437;5252775;5252775;5253421;5253421;5254206;5254206;5254777;5254777;5256082;5256082;5257056;5257056;5259287;5259287;5271690;5271690;5273725;5273725;5274807;5274807;5277121;5277121;5277545;5277545…	+;+;+;+;+;+;+;+;+;+;+;+;+;+;+;+;+;+;+;+;+;+;+;+;+;+;+;+;+;+;+;+;+;+;+;+;+;+;+;+;+;+;+;+;+;+;+;+;+;+;+;+;+;+;+;+;+;+;+;+;+;+;+;+;+;+;+;+;+;+;+;+	5883	218	299	201	408	602	633
CSbapl.298	BAPLcs_chr1;BAPLcs_chr1;BAPLcs_chr1	5300823;5301661;5304184	5300915;5301990;5304405	+;+;+	645	106	92	83	1818	1090	1780
CSbapl.299	BAPLcs_chr1	5305786	5306106	+	321	0	0	2	2	1	2
CSbapl.302	BAPLcs_chr1;BAPLcs_chr1;BAPLcs_chr1;BAPLcs_chr1;BAPLcs_chr1;BAPLcs_chr1;BAPLcs_chr1	5315967;5315967;5327697;5327697;5329000;5329000;5332905	5316670;5316670;5327809;5327809;5329214;5329214;5332907	-;-;-;-;-;-;-	1035	717	1692	201	37	444	256
CSbapl.303	BAPLcs_chr1	5340903	5342696	-	1794	2	20	2	43	23	72
CSbapl.305	BAPLcs_chr1;BAPLcs_chr1;BAPLcs_chr1;BAPLcs_chr1;BAPLcs_chr1;BAPLcs_chr1;BAPLcs_chr1;BAPLcs_chr1;BAPLcs_chr1;BAPLcs_chr1;BAPLcs_chr1;BAPLcs_chr1;BAPLcs_chr1;BAPLcs_chr1;BAPLcs_chr1;BAPLcs_chr1;BAPLcs_chr1;BAPLcs_chr1;BAPLcs_chr1;BAPLcs_chr1;BAPLcs_chr1;BAPLcs_chr1;BAPLcs_chr1;BAPLcs_chr1;BAPLcs_chr1;BAPLcs_chr1;BAPLcs_chr1;BAPLcs_chr1;BAPLcs_chr1;BAPLcs_chr1;BAPLcs_chr1;BAPLcs_chr1;BAPLcs_chr1;BAP…	5401108;5409022;5409396;5410363;5411359;5414543;5468211;5475087;5475700;5477521;5477521;5477521;5477536;5482406;5482406;5482406;5482406;5483095;5483095;5483095;5483095;5483914;5483914;5483914;5483914;5485213;5485213;5485213;5485213;5486970;5486970;5486970;5486970;5487818;5487818;5487818;5489225;5489225;5489225;5491643;5491643;5491643;5492267;5492267;5492267;5492843;5492843;5492843;5497044;5497044…	5401272;5409117;5409488;5410535;5411460;5415236;5468430;5475235;5475918;5477793;5477793;5477793;5477793;5482611;5482611;5482611;5482611;5483209;5483209;5483209;5483209;5484110;5484110;5484110;5484110;5485558;5485558;5485558;5485558;5487167;5487167;5487167;5487167;5488138;5488138;5488138;5489375;5489375;5489375;5491830;5491830;5491830;5492429;5492429;5492429;5493009;5493009;5493009;5497358;5497358…	-;-;-;-;-;-;-;-;-;-;-;-;-;-;-;-;-;-;-;-;-;-;-;-;-;-;-;-;-;-;-;-;-;-;-;-;-;-;-;-;-;-;-;-;-;-;-;-;-;-;-;-;-;-;-;-;-;-;-;-;-;-;-;-;-;-;-;-;-;-;-;-;-;-;-;-;-;-;-;-;-;-;-;-;-;-;-;-;-;-;-;-;-;-;-;-;-;-;-;-;-;-;-;-;-;-;-;-;-;-;-;-;-;-;-;-;-;-;-;-;-;-;-;-;-;-;-;-;-;-;-;-;-;-;-;-;-;-;-;-;-;-;-;-;-;-;-;-;-;-;-;-;-;-;-;-;-;-;-;-;-;-;-;-;-;-;-;-;-;-;-;-;-;-;-;-;-;-;-;-;-;-;-;-;-;-;-;-;-;-;-;-;-;-;-;-;-;-;-;-…	40677	1646	2642	642	2167	1450	2342
CSbapl.306	BAPLcs_chr1;BAPLcs_chr1;BAPLcs_chr1;BAPLcs_chr1;BAPLcs_chr1;BAPLcs_chr1;BAPLcs_chr1;BAPLcs_chr1;BAPLcs_chr1	5424136;5424506;5426379;5427125;5427957;5428956;5432711;5433716;5438083	5424270;5424623;5426479;5427266;5428051;5429061;5432795;5433917;5438217	+;+;+;+;+;+;+;+;+	1119	24	1	2	7	30	10
CSbapl.308	BAPLcs_chr1	5445480	5446697	+	1218	0	0	0	2	3	2
CSbapl.309	BAPLcs_chr1	5456547	5457527	+	981	361	379	253	736	512	616
CSbapl.314	BAPLcs_chr1	5802276	5803061	+	786	10	8	5	8	2	0
CSbapl.315	BAPLcs_chr1;BAPLcs_chr1;BAPLcs_chr1;BAPLcs_chr1;BAPLcs_chr1;BAPLcs_chr1;BAPLcs_chr1	5890094;5904135;5904169;5906098;5906098;5908227;5908227	5890118;5904266;5904266;5906225;5906225;5908374;5908374	+;+;+;+;+;+;+	433	181	186	155	151	195	164
CSbapl.316	BAPLcs_chr1;BAPLcs_chr1;BAPLcs_chr1;BAPLcs_chr1;BAPLcs_chr1;BAPLcs_chr1;BAPLcs_chr1;BAPLcs_chr1;BAPLcs_chr1;BAPLcs_chr1;BAPLcs_chr1;BAPLcs_chr1;BAPLcs_chr1;BAPLcs_chr1;BAPLcs_chr1;BAPLcs_chr1;BAPLcs_chr1;BAPLcs_chr1;BAPLcs_chr1;BAPLcs_chr1;BAPLcs_chr1;BAPLcs_chr1;BAPLcs_chr1;BAPLcs_chr1;BAPLcs_chr1;BAPLcs_chr1;BAPLcs_chr1;BAPLcs_chr1;BAPLcs_chr1;BAPLcs_chr1;BAPLcs_chr1	5915739;5917663;5918129;5918575;5919562;5920160;5921396;5934071;5936376;5937825;5940272;5941791;5943600;5945279;5948119;5952690;5959205;5960798;5967101;5970045;5976412;5976910;5977535;5977775;5980156;5982580;5985553;5988909;5990645;5992165;6010890	5916062;5917858;5918249;5918690;5919658;5920278;5921487;5934218;5936539;5937947;5940467;5941899;5944064;5945444;5948338;5952973;5959300;5960993;5967263;5970281;5976488;5977028;5977566;5977925;5980238;5982759;5985589;5989114;5990791;5992302;6010896	-;-;-;-;-;-;-;-;-;-;-;-;-;-;-;-;-;-;-;-;-;-;-;-;-;-;-;-;-;-;-	4809	98	201	166	3433	3185	4167
CSbapl.318	BAPLcs_chr1	5949789	5951246	+	1458	4	3	0	17	6	10
CSbapl.322	BAPLcs_chr1;BAPLcs_chr1;BAPLcs_chr1;BAPLcs_chr1;BAPLcs_chr1;BAPLcs_chr1;BAPLcs_chr1;BAPLcs_chr1;BAPLcs_chr1;BAPLcs_chr1;BAPLcs_chr1;BAPLcs_chr1;BAPLcs_chr1;BAPLcs_chr1;BAPLcs_chr1;BAPLcs_chr1;BAPLcs_chr1;BAPLcs_chr1;BAPLcs_chr1;BAPLcs_chr1;BAPLcs_chr1;BAPLcs_chr1;BAPLcs_chr1;BAPLcs_chr1;BAPLcs_chr1;BAPLcs_chr1;BAPLcs_chr1;BAPLcs_chr1;BAPLcs_chr1;BAPLcs_chr1;BAPLcs_chr1;BAPLcs_chr1;BAPLcs_chr1;BAP…	6053704;6053839;6060482;6060482;6066611;6066611;6070409;6070409;6075229;6075229;6099574;6135631;6135631;6135631;6135679;6141832;6142309;6142349;6142349;6142349;6156104;6156104;6156104;6156104;6156104;6159222;6159222;6159222;6159222;6159222;6209212;6209212;6209212;6209212;6209212;6209212;6209212;6209212;6209212;6224517;6224517;6224517;6224517;6224517;6224517;6224517;6224517;6224517;6224621;6224621…	6053992;6053992;6060623;6060623;6066751;6066751;6070522;6070522;6075316;6075316;6099606;6135886;6135886;6135886;6135886;6141962;6142470;6142470;6142470;6142470;6156275;6156275;6156275;6156275;6156275;6159433;6159433;6159433;6159433;6159433;6209710;6209710;6209710;6209710;6209710;6209710;6209710;6209710;6209710;6224633;6224633;6224633;6224633;6224633;6224662;6224633;6224633;6224633;6224633;6224633…	+;+;+;+;+;+;+;+;+;+;+;+;+;+;+;+;+;+;+;+;+;+;+;+;+;+;+;+;+;+;+;+;+;+;+;+;+;+;+;+;+;+;+;+;+;+;+;+;+;+;+;+;+;+;+;+;+;+;+;+;+;+;+;+;+;+;+;+;+;+;+;+;+;+;+;+;+;+;+;+;+;+;+;+;+;+;+;+;+;+;+;+	5571	1070	1406	657	1692	1167	1258
CSbapl.323	BAPLcs_chr1;BAPLcs_chr1;BAPLcs_chr1;BAPLcs_chr1	6357107;6357107;6359892;6359892	6357563;6357563;6359989;6359989	-;-;-;-	555	8	8	0	2	6	4
CSbapl.325	BAPLcs_chr1;BAPLcs_chr1;BAPLcs_chr1;BAPLcs_chr1	6447913;6447913;6449549;6449549	6448285;6448285;6449640;6449652	-;-;-;-	477	414	350	380	516	618	730
CSbapl.327	BAPLcs_chr1;BAPLcs_chr1;BAPLcs_chr1;BAPLcs_chr1;BAPLcs_chr1;BAPLcs_chr1;BAPLcs_chr1;BAPLcs_chr1;BAPLcs_chr1	6480817;6481501;6488986;6489704;6491908;6496541;6498843;6505653;6522196	6481089;6481596;6489180;6489789;6491989;6496590;6498936;6505760;6522264	-;-;-;-;-;-;-;-;-	1053	23	18	5	12	15	13
CSbapl.331	BAPLcs_chr1	6515633	6516301	-	669	2	0	0	0	2	0
CSbapl.332	BAPLcs_chr1	6518952	6519716	-	765	0	0	0	0	9	1
CSbapl.333	BAPLcs_chr1	6523498	6524151	-	654	0	0	0	2	8	0
CSbapl.346	BAPLcs_chr1;BAPLcs_chr1;BAPLcs_chr1;BAPLcs_chr1;BAPLcs_chr1;BAPLcs_chr1;BAPLcs_chr1;BAPLcs_chr1;BAPLcs_chr1;BAPLcs_chr1;BAPLcs_chr1;BAPLcs_chr1;BAPLcs_chr1;BAPLcs_chr1;BAPLcs_chr1;BAPLcs_chr1;BAPLcs_chr1;BAPLcs_chr1;BAPLcs_chr1;BAPLcs_chr1;BAPLcs_chr1;BAPLcs_chr1;BAPLcs_chr1;BAPLcs_chr1;BAPLcs_chr1;BAPLcs_chr1;BAPLcs_chr1;BAPLcs_chr1;BAPLcs_chr1;BAPLcs_chr1;BAPLcs_chr1;BAPLcs_chr1;BAPLcs_chr1;BAP…	6573284;6580743;6581897;6582824;6583483;6585426;6587399;6587539;6588858;6588858;6590148;6590148;6591626;6591626;6592445;6592445;6593065;6593065;6594624;6594624;6595175;6595175;6595667;6596680;6597491;6599038;6602038;6606258;6608469;6609128;6610782;6613431;6614906;6616061;6618057;6618860;6621186;6624024;6624750;6625590;6626076;6627682;6628686;6629777;6631136;6632784;6634211;6639289	6573388;6580867;6581999;6582997;6583563;6585616;6587526;6587581;6589018;6589018;6590258;6590258;6591778;6591778;6592509;6592509;6593176;6593176;6594724;6594724;6595331;6595305;6595821;6596813;6597766;6599101;6602112;6606380;6608573;6609304;6610934;6613667;6615106;6616212;6618123;6618976;6621332;6624104;6624884;6625712;6626210;6627774;6628783;6629951;6631246;6632836;6634288;6639346	+;+;+;+;+;+;+;+;+;+;+;+;+;+;+;+;+;+;+;+;+;+;+;+;+;+;+;+;+;+;+;+;+;+;+;+;+;+;+;+;+;+;+;+;+;+;+;+	5133	318	448	292	2096	3264	2978
CSbapl.354	BAPLcs_chr1;BAPLcs_chr1;BAPLcs_chr1;BAPLcs_chr1;BAPLcs_chr1;BAPLcs_chr1	6669935;6669935;6671233;6671233;6676399;6676399	6670069;6670069;6671487;6671487;6676725;6676725	+;+;+;+;+;+	717	379	409	392	406	500	592
CSbapl.355	BAPLcs_chr1;BAPLcs_chr1;BAPLcs_chr1;BAPLcs_chr1;BAPLcs_chr1;BAPLcs_chr1;BAPLcs_chr1;BAPLcs_chr1;BAPLcs_chr1;BAPLcs_chr1;BAPLcs_chr1;BAPLcs_chr1;BAPLcs_chr1;BAPLcs_chr1;BAPLcs_chr1;BAPLcs_chr1;BAPLcs_chr1;BAPLcs_chr1	6688365;6688365;6691154;6691154;6695720;6695720;6700786;6700786;6702459;6702459;6703488;6703488;6704820;6704820;6711650;6711650;6713141;6713141	6688717;6688717;6691193;6691193;6695778;6695778;6701262;6701262;6702599;6702599;6703577;6703577;6704981;6704981;6711763;6711763;6713252;6713252	-;-;-;-;-;-;-;-;-;-;-;-;-;-;-;-;-;-	1548	34	57	33	57	67	25
CSbapl.356	BAPLcs_chr1;BAPLcs_chr1;BAPLcs_chr1;BAPLcs_chr1;BAPLcs_chr1;BAPLcs_chr1;BAPLcs_chr1;BAPLcs_chr1;BAPLcs_chr1;BAPLcs_chr1;BAPLcs_chr1;BAPLcs_chr1;BAPLcs_chr1;BAPLcs_chr1;BAPLcs_chr1;BAPLcs_chr1;BAPLcs_chr1;BAPLcs_chr1;BAPLcs_chr1;BAPLcs_chr1;BAPLcs_chr1;BAPLcs_chr1;BAPLcs_chr1;BAPLcs_chr1;BAPLcs_chr1;BAPLcs_chr1;BAPLcs_chr1;BAPLcs_chr1;BAPLcs_chr1;BAPLcs_chr1;BAPLcs_chr1;BAPLcs_chr1;BAPLcs_chr1;BAP…	6714904;6724253;6724932;6726960;6727694;6728087;6729936;6730107;6731424;6731424;6737650;6737650;6737650;6737670;6737670;6742854;6742854;6742854;6742854;6742854;6744128;6744128;6744128;6744128;6744128;6746099;6746099;6746099;6746099;6746099;6747771;6747771;6747771;6747771;6747771;6748918;6748918;6748918;6748918;6748918;6750066;6750066;6750066;6750066;6750066;6769959;6769959;6769959;6769959;6769959…	6714984;6724414;6724997;6727040;6727785;6728192;6730115;6730115;6731530;6731530;6737793;6737793;6737793;6737793;6737793;6742993;6742993;6742993;6742993;6742993;6744189;6744189;6744189;6744189;6744189;6746265;6746265;6746265;6746265;6746265;6747938;6747938;6747938;6747938;6747938;6748993;6748993;6748993;6748993;6748993;6750211;6750211;6750211;6750211;6750211;6770095;6770095;6770095;6770095;6770095…	+;+;+;+;+;+;+;+;+;+;+;+;+;+;+;+;+;+;+;+;+;+;+;+;+;+;+;+;+;+;+;+;+;+;+;+;+;+;+;+;+;+;+;+;+;+;+;+;+;+;+;+;+;+;+;+;+;+;+;+	2186	444	525	385	664	294	542
CSbapl.359	BAPLcs_chr1;BAPLcs_chr1;BAPLcs_chr1;BAPLcs_chr1;BAPLcs_chr1;BAPLcs_chr1;BAPLcs_chr1;BAPLcs_chr1;BAPLcs_chr1;BAPLcs_chr1	6782701;6782701;6782701;6784214;6784214;6784214;6805236;6805236;6808812;6808812	6783060;6783060;6783060;6784324;6784324;6784324;6805576;6805576;6809124;6809124	-;-;-;-;-;-;-;-;-;-	1125	89	210	56	162	107	159
CSbapl.360	BAPLcs_chr1	6788017	6788772	-	756	0	2	2	3	1	2
CSbapl.362	BAPLcs_chr1;BAPLcs_chr1;BAPLcs_chr1	6842755;6842755;6842755	6844065;6844065;6844065	+;+;+	1311	38	69	30	17	27	11
CSbapl.371	BAPLcs_chr1	6883711	6884337	-	627	3	0	0	6	0	2
CSbapl.379	BAPLcs_chr1	6942696	6943655	-	960	0	0	0	1	0	0
CSbapl.381	BAPLcs_chr1	6947658	6947963	+	306	0	0	0	0	0	1
CSbapl.382	BAPLcs_chr1;BAPLcs_chr1;BAPLcs_chr1;BAPLcs_chr1;BAPLcs_chr1;BAPLcs_chr1;BAPLcs_chr1;BAPLcs_chr1;BAPLcs_chr1;BAPLcs_chr1;BAPLcs_chr1;BAPLcs_chr1;BAPLcs_chr1;BAPLcs_chr1;BAPLcs_chr1;BAPLcs_chr1;BAPLcs_chr1;BAPLcs_chr1;BAPLcs_chr1;BAPLcs_chr1;BAPLcs_chr1;BAPLcs_chr1;BAPLcs_chr1;BAPLcs_chr1;BAPLcs_chr1;BAPLcs_chr1;BAPLcs_chr1;BAPLcs_chr1;BAPLcs_chr1;BAPLcs_chr1;BAPLcs_chr1;BAPLcs_chr1;BAPLcs_chr1;BAP…	6970740;6970740;6970740;6970740;6970740;6970740;6970740;6970740;6970740;6970740;6970740;6970740;6970740;7006058;7006058;7006058;7006058;7006058;7006058;7006058;7006058;7006058;7006058;7006058;7006058;7006058;7008907;7008907;7008907;7008907;7008907;7014874;7014874;7014874;7014874;7014874;7014874;7014874;7014874;7014874;7014874;7014874;7014874;7014874;7024905;7024905;7024905;7024905;7024905;7024905…	6972505;6972505;6972505;6972505;6972505;6972505;6972505;6972505;6972505;6972505;6972505;6972505;6972505;7006158;7006158;7006158;7006158;7006158;7006158;7006158;7006158;7006158;7006158;7006158;7006158;7006158;7008948;7008948;7008948;7008948;7008948;7014992;7014992;7014992;7014992;7014992;7014992;7014992;7014992;7014992;7014998;7014992;7014992;7014992;7025004;7025004;7025004;7025004;7025004;7025004…	+;+;+;+;+;+;+;+;+;+;+;+;+;+;+;+;+;+;+;+;+;+;+;+;+;+;+;+;+;+;+;+;+;+;+;+;+;+;+;+;+;+;+;+;+;+;+;+;+;+;+;+;+;+;+;+;+;+;+;+;+;+;+;+;+;+;+;+;+;+;+;+;+;+;+;+;+;+;+;+;+;+;+;+;+;+;+;+;+;+;+;+;+;+;+;+;+;+;+;+;+;+;+	3353	36	49	28	1460	889	946
CSbapl.384	BAPLcs_chr1;BAPLcs_chr1;BAPLcs_chr1;BAPLcs_chr1;BAPLcs_chr1;BAPLcs_chr1;BAPLcs_chr1	7094641;7098306;7125633;7127241;7128075;7141002;7143935	7094758;7098424;7125827;7127310;7128166;7141201;7144361	-;-;-;-;-;-;-	1221	153	0	0	118	7	9
CSbapl.385	BAPLcs_chr1	7100059	7100574	+	516	0	0	0	4	0	2
CSbapl.390	BAPLcs_chr1	7153318	7153776	+	459	0	0	0	1	0	0
CSbapl.404	BAPLcs_chr1	7224766	7225356	+	591	0	0	0	4	0	0
CSbapl.407	BAPLcs_chr1	7243535	7243912	-	378	0	0	0	2	0	0
CSbapl.410	BAPLcs_chr1	7270841	7271671	-	831	0	0	0	1	0	0
CSbapl.435	BAPLcs_chr1;BAPLcs_chr1;BAPLcs_chr1;BAPLcs_chr1	7404686;7404686;7405806;7405806	7404898;7404898;7406003;7406003	+;+;+;+	411	0	5	2	0	6	2
CSbapl.437	BAPLcs_chr1;BAPLcs_chr1;BAPLcs_chr1	7424153;7495749;7496849	7425487;7495924;7496930	-;-;-	1593	0	2	0	0	0	0
CSbapl.451	BAPLcs_chr1;BAPLcs_chr1;BAPLcs_chr1	7544800;7552087;7552087	7545561;7553361;7553361	-;-;-	2037	2	0	0	0	3	1
CSbapl.457	BAPLcs_chr1;BAPLcs_chr1;BAPLcs_chr1;BAPLcs_chr1;BAPLcs_chr1;BAPLcs_chr1;BAPLcs_chr1;BAPLcs_chr1;BAPLcs_chr1;BAPLcs_chr1;BAPLcs_chr1;BAPLcs_chr1;BAPLcs_chr1;BAPLcs_chr1;BAPLcs_chr1;BAPLcs_chr1;BAPLcs_chr1;BAPLcs_chr1;BAPLcs_chr1;BAPLcs_chr1;BAPLcs_chr1;BAPLcs_chr1;BAPLcs_chr1;BAPLcs_chr1;BAPLcs_chr1;BAPLcs_chr1;BAPLcs_chr1;BAPLcs_chr1;BAPLcs_chr1;BAPLcs_chr1;BAPLcs_chr1;BAPLcs_chr1;BAPLcs_chr1;BAP…	7630334;7630334;7630334;7634545;7634545;7650011;7658221;7658221;7658221;7669297;7669297;7669297;7672769;7672769;7672769;7674319;7674319;7674319;7675886;7675886;7675886;7677352;7677352;7677352;7679240;7679240;7679240;7679724;7679724;7679724;7680344;7680344;7680344;7682095;7682095;7682095;7684480;7684480;7684480;7685795;7685795;7685795;7687151;7687151;7687151;7689626;7689626;7689626;7690700;7690700…	7630405;7630405;7630405;7634618;7634618;7650207;7658329;7658329;7658329;7669444;7669444;7669444;7672842;7672842;7672842;7674425;7674425;7674425;7675993;7675993;7675993;7677473;7677473;7677473;7679362;7679362;7679362;7679842;7679842;7679842;7680418;7680418;7680418;7682214;7682214;7682214;7684557;7684557;7684557;7685881;7685881;7685881;7687333;7687333;7687333;7689731;7689731;7689731;7690992;7690992…	+;+;+;+;+;+;+;+;+;+;+;+;+;+;+;+;+;+;+;+;+;+;+;+;+;+;+;+;+;+;+;+;+;+;+;+;+;+;+;+;+;+;+;+;+;+;+;+;+;+;+;+;+;+;+;+;+;+;+;+;+;+;+;+;+;+;+;+;+;+;+;+;+;+;+	3161	62	73	61	234	151	175
CSbapl.458	BAPLcs_chr1	7640578	7640895	-	318	0	0	2	3	0	0
CSbapl.463	BAPLcs_chr1;BAPLcs_chr1;BAPLcs_chr1;BAPLcs_chr1;BAPLcs_chr1;BAPLcs_chr1;BAPLcs_chr1;BAPLcs_chr1;BAPLcs_chr1;BAPLcs_chr1;BAPLcs_chr1;BAPLcs_chr1;BAPLcs_chr1;BAPLcs_chr1;BAPLcs_chr1;BAPLcs_chr1;BAPLcs_chr1;BAPLcs_chr1;BAPLcs_chr1	7734382;7737341;7757261;7757261;7760222;7760222;7762612;7762612;7764538;7764538;7770317;7770317;7771958;7771958;7777573;7777573;7778719;7778719;7785504	7734789;7737484;7757668;7757668;7760367;7760367;7762747;7762747;7764713;7764713;7771012;7771012;7772026;7772026;7777825;7777825;7778861;7778796;7785543	-;-;-;-;-;-;-;-;-;-;-;-;-;-;-;-;-;-;-	2619	41	59	41	74	66	47
CSbapl.466	BAPLcs_chr1;BAPLcs_chr1;BAPLcs_chr1;BAPLcs_chr1;BAPLcs_chr1;BAPLcs_chr1;BAPLcs_chr1;BAPLcs_chr1;BAPLcs_chr1;BAPLcs_chr1;BAPLcs_chr1;BAPLcs_chr1;BAPLcs_chr1;BAPLcs_chr1;BAPLcs_chr1;BAPLcs_chr1;BAPLcs_chr1;BAPLcs_chr1;BAPLcs_chr1;BAPLcs_chr1;BAPLcs_chr1;BAPLcs_chr1;BAPLcs_chr1;BAPLcs_chr1;BAPLcs_chr1;BAPLcs_chr1;BAPLcs_chr1;BAPLcs_chr1;BAPLcs_chr1;BAPLcs_chr1;BAPLcs_chr1;BAPLcs_chr1;BAPLcs_chr1;BAP…	7846670;7850915;7864566;7873214;7873214;7884534;7884534;7887974;7887974;7889301;7889301;7890869;7890869;7892335;7892335;7894223;7894223;7894707;7894707;7895326;7895326;7897077;7897077;7899462;7899462;7900724;7900724;7902080;7902080;7904554;7904554;7905627;7905627;7906725;7906725;7907558;7907558;7910089;7910089;7911365;7911365;7917500;7921118;7921118;7922651;7922651;7924187;7924187;7930652	7846741;7850988;7864714;7873322;7873322;7884681;7884681;7888047;7888047;7889407;7889407;7890976;7890976;7892456;7892456;7894345;7894345;7894825;7894825;7895400;7895400;7897196;7897196;7899539;7899539;7900810;7900810;7902262;7902262;7904659;7904659;7905919;7905919;7906766;7906766;7907635;7907635;7910215;7910215;7911427;7911427;7917952;7921178;7921178;7922730;7922730;7924254;7924250;7930673	+;+;+;+;+;+;+;+;+;+;+;+;+;+;+;+;+;+;+;+;+;+;+;+;+;+;+;+;+;+;+;+;+;+;+;+;+;+;+;+;+;+;+;+;+;+;+;+;+	3141	95	120	57	330	151	155
CSbapl.471	BAPLcs_chr1;BAPLcs_chr1;BAPLcs_chr1;BAPLcs_chr1;BAPLcs_chr1;BAPLcs_chr1;BAPLcs_chr1;BAPLcs_chr1;BAPLcs_chr1;BAPLcs_chr1;BAPLcs_chr1	7951573;7954532;7960185;7962028;7962112;7967894;7967894;7969535;7976363;7977509;7981679	7951980;7954677;7960320;7962287;7962287;7968475;7968491;7969603;7976615;7977651;7981742	-;-;-;-;-;-;-;-;-;-;-	2077	34	60	34	45	47	32
CSbapl.472	BAPLcs_chr1;BAPLcs_chr1;BAPLcs_chr1;BAPLcs_chr1;BAPLcs_chr1;BAPLcs_chr1;BAPLcs_chr1;BAPLcs_chr1;BAPLcs_chr1;BAPLcs_chr1;BAPLcs_chr1;BAPLcs_chr1;BAPLcs_chr1;BAPLcs_chr1;BAPLcs_chr1;BAPLcs_chr1;BAPLcs_chr1;BAPLcs_chr1;BAPLcs_chr1;BAPLcs_chr1;BAPLcs_chr1;BAPLcs_chr1;BAPLcs_chr1;BAPLcs_chr1;BAPLcs_chr1;BAPLcs_chr1;BAPLcs_chr1;BAPLcs_chr1;BAPLcs_chr1;BAPLcs_chr1;BAPLcs_chr1;BAPLcs_chr1;BAPLcs_chr1;BAP…	7987045;7987045;7987045;7987045;7989405;7989405;7989405;7989405;7992720;7992720;7992720;7992720;7993449;7993449;7993449;7993449;7996859;7996859;7996859;7996859;8001274;8001274;8001274;8001274;8002314;8002314;8002314;8002317;8002777;8002777;8002777;8002777;8004821;8004821;8004821;8004821;8009207;8009207;8009207;8009207;8012097;8012097;8012097;8012097;8013507;8013507;8013507;8013507;8015735;8015735…	7987145;7987145;7987145;7987145;7989462;7989462;7989462;7989462;7992869;7992869;7992869;7992869;7993630;7993630;7993630;7993630;7997094;7997094;7997034;7997094;8001799;8001799;8001799;8001799;8002392;8002392;8002392;8002392;8002946;8002946;8002946;8002946;8004869;8004869;8004869;8004869;8009979;8009979;8009979;8009979;8012157;8012157;8012157;8012157;8013641;8013641;8013641;8013641;8015879;8015879…	+;+;+;+;+;+;+;+;+;+;+;+;+;+;+;+;+;+;+;+;+;+;+;+;+;+;+;+;+;+;+;+;+;+;+;+;+;+;+;+;+;+;+;+;+;+;+;+;+;+;+;+;+;+;+;+;+;+;+;+;+;+;+;+;+;+;+;+;+;+;+;+;+;+;+;+;+;+;+;+;+;+;+;+;+;+;+	3525	65	99	41	158	139	162
CSbapl.478	BAPLcs_chr1;BAPLcs_chr1;BAPLcs_chr1;BAPLcs_chr1	8133211;8135102;8137272;8138827	8133262;8135341;8137426;8139330	+;+;+;+	951	42	73	44	2	90	4
CSbapl.492	BAPLcs_chr1;BAPLcs_chr1;BAPLcs_chr1;BAPLcs_chr1;BAPLcs_chr1;BAPLcs_chr1;BAPLcs_chr1;BAPLcs_chr1;BAPLcs_chr1;BAPLcs_chr1;BAPLcs_chr1;BAPLcs_chr1;BAPLcs_chr1;BAPLcs_chr1;BAPLcs_chr1;BAPLcs_chr1;BAPLcs_chr1;BAPLcs_chr1;BAPLcs_chr1;BAPLcs_chr1;BAPLcs_chr1;BAPLcs_chr1	8217694;8217694;8219058;8219058;8219743;8219743;8221386;8221386;8272812;8272812;8273472;8273472;8277020;8277020;8277821;8277821;8279085;8279085;8280653;8280653;8285673;8285673	8217855;8217855;8219142;8219142;8219874;8219874;8221675;8221675;8272909;8272909;8273601;8273601;8277158;8277158;8277948;8277948;8279243;8279243;8280751;8280751;8285966;8285966	-;-;-;-;-;-;-;-;-;-;-;-;-;-;-;-;-;-;-;-;-;-	1716	69	94	25	140	85	100
CSbapl.493	BAPLcs_chr1;BAPLcs_chr1;BAPLcs_chr1;BAPLcs_chr1;BAPLcs_chr1;BAPLcs_chr1;BAPLcs_chr1;BAPLcs_chr1;BAPLcs_chr1;BAPLcs_chr1;BAPLcs_chr1;BAPLcs_chr1;BAPLcs_chr1;BAPLcs_chr1;BAPLcs_chr1;BAPLcs_chr1;BAPLcs_chr1;BAPLcs_chr1;BAPLcs_chr1;BAPLcs_chr1;BAPLcs_chr1;BAPLcs_chr1;BAPLcs_chr1;BAPLcs_chr1;BAPLcs_chr1	8221762;8226121;8226618;8238030;8239099;8241009;8241148;8242969;8242969;8248371;8248371;8249670;8249670;8250052;8250052;8251072;8251072;8264721;8264721;8265803;8265803;8266693;8266693;8269642;8269642	8221831;8226239;8226743;8238136;8239257;8241210;8241210;8243079;8243079;8248535;8248535;8249796;8249796;8250260;8250260;8251131;8251131;8264905;8264905;8265895;8265895;8266816;8266816;8269704;8269704	+;+;+;+;+;+;+;+;+;+;+;+;+;+;+;+;+;+;+;+;+;+;+;+;+	1920	837	1145	638	911	1351	1688
CSbapl.497	BAPLcs_chr1;BAPLcs_chr1;BAPLcs_chr1;BAPLcs_chr1;BAPLcs_chr1;BAPLcs_chr1;BAPLcs_chr1;BAPLcs_chr1;BAPLcs_chr1;BAPLcs_chr1;BAPLcs_chr1	8295796;8300243;8301379;8302364;8304047;8304915;8306545;8307173;8308165;8347016;8354055	8296134;8300382;8301441;8302421;8304093;8305005;8306579;8307403;8308284;8347114;8354115	-;-;-;-;-;-;-;-;-;-;-	1284	645	566	465	584	664	747
CSbapl.498	BAPLcs_chr1;BAPLcs_chr1;BAPLcs_chr1;BAPLcs_chr1;BAPLcs_chr1;BAPLcs_chr1;BAPLcs_chr1;BAPLcs_chr1;BAPLcs_chr1;BAPLcs_chr1;BAPLcs_chr1;BAPLcs_chr1;BAPLcs_chr1;BAPLcs_chr1;BAPLcs_chr1;BAPLcs_chr1;BAPLcs_chr1;BAPLcs_chr1;BAPLcs_chr1;BAPLcs_chr1	8356396;8360566;8361486;8363438;8365852;8368422;8370645;8372168;8373139;8375241;8376575;8381883;8382492;8383999;8385862;8386416;8389231;8402636;8404615;8406190	8356653;8360752;8361596;8365040;8365882;8369462;8370740;8372340;8373272;8375312;8376833;8382039;8382611;8384175;8385945;8386499;8389329;8402684;8404736;8406336	+;+;+;+;+;+;+;+;+;+;+;+;+;+;+;+;+;+;+;+	5004	584	607	506	410	987	882
CSbapl.505	BAPLcs_chr1;BAPLcs_chr1;BAPLcs_chr1;BAPLcs_chr1;BAPLcs_chr1	8452664;8452664;8453380;8455586;8460048	8453074;8453039;8453514;8455773;8460200	+;+;+;+;+	887	1	3	6	104	143	203
CSbapl.506	BAPLcs_chr1;BAPLcs_chr1;BAPLcs_chr1;BAPLcs_chr1;BAPLcs_chr1;BAPLcs_chr1;BAPLcs_chr1;BAPLcs_chr1;BAPLcs_chr1;BAPLcs_chr1;BAPLcs_chr1;BAPLcs_chr1;BAPLcs_chr1;BAPLcs_chr1	8467957;8468549;8469169;8469794;8470860;8472614;8481869;8482342;8483544;8484277;8484998;8488915;8490336;8521378	8468195;8468741;8469368;8470104;8471167;8472858;8482064;8482547;8483833;8484587;8485242;8489059;8490466;8521579	-;-;-;-;-;-;-;-;-;-;-;-;-;-	3222	2	10	4	2	18	15
CSbapl.513	BAPLcs_chr1	8549823	8550185	+	363	0	0	1	0	0	0
CSbapl.517	BAPLcs_chr1;BAPLcs_chr1;BAPLcs_chr1	8565787;8571637;8575313	8565951;8571994;8576148	+;+;+	1359	25	44	12	28	18	10
CSbapl.519	BAPLcs_chr1;BAPLcs_chr1;BAPLcs_chr1;BAPLcs_chr1;BAPLcs_chr1;BAPLcs_chr1;BAPLcs_chr1;BAPLcs_chr1;BAPLcs_chr1;BAPLcs_chr1;BAPLcs_chr1;BAPLcs_chr1;BAPLcs_chr1;BAPLcs_chr1;BAPLcs_chr1;BAPLcs_chr1;BAPLcs_chr1;BAPLcs_chr1;BAPLcs_chr1;BAPLcs_chr1;BAPLcs_chr1;BAPLcs_chr1;BAPLcs_chr1;BAPLcs_chr1;BAPLcs_chr1;BAPLcs_chr1;BAPLcs_chr1;BAPLcs_chr1;BAPLcs_chr1;BAPLcs_chr1;BAPLcs_chr1;BAPLcs_chr1;BAPLcs_chr1;BAP…	8589817;8589817;8589817;8590589;8590589;8590589;8594444;8594444;8594444;8594517;8594517;8595092;8595092;8595092;8595092;8595092;8596762;8596762;8596762;8598290;8598290;8598290;8598290;8598290;8598752;8598752;8598752;8598752;8598752;8600094;8600094;8600094;8600094;8600094;8600553;8600553;8600553;8600553;8600553;8601594;8601594;8601594;8601594;8601594;8602802;8604232;8605726;8607571;8615612;8615765	8589939;8589939;8589939;8590651;8590651;8590651;8594561;8594561;8594561;8594561;8594561;8595156;8595156;8595156;8595156;8595156;8596826;8596826;8596826;8598361;8598361;8598361;8598361;8598361;8598831;8598831;8598831;8598831;8598831;8600250;8600250;8600250;8600250;8600250;8600625;8600625;8600625;8600625;8600625;8601697;8601620;8601620;8601620;8601620;8602858;8604282;8605766;8607671;8615671;8615857	-;-;-;-;-;-;-;-;-;-;-;-;-;-;-;-;-;-;-;-;-;-;-;-;-;-;-;-;-;-;-;-;-;-;-;-;-;-;-;-;-;-;-;-;-;-;-;-;-;-	1323	309	547	250	510	636	670
CSbapl.521	BAPLcs_chr1;BAPLcs_chr1	8630281;8633160	8630935;8633785	+;+	1281	18	30	14	41	60	55
CSbapl.522	BAPLcs_chr1;BAPLcs_chr1;BAPLcs_chr1;BAPLcs_chr1;BAPLcs_chr1;BAPLcs_chr1;BAPLcs_chr1;BAPLcs_chr1;BAPLcs_chr1;BAPLcs_chr1;BAPLcs_chr1;BAPLcs_chr1;BAPLcs_chr1;BAPLcs_chr1;BAPLcs_chr1;BAPLcs_chr1;BAPLcs_chr1;BAPLcs_chr1;BAPLcs_chr1;BAPLcs_chr1;BAPLcs_chr1;BAPLcs_chr1;BAPLcs_chr1;BAPLcs_chr1;BAPLcs_chr1;BAPLcs_chr1;BAPLcs_chr1;BAPLcs_chr1;BAPLcs_chr1;BAPLcs_chr1;BAPLcs_chr1;BAPLcs_chr1;BAPLcs_chr1;BAP…	8660049;8664091;8666408;8669592;8670634;8676836;8678363;8681713;8683077;8685473;8708804;8711166;8711172;8711172;8717567;8717567;8717567;8726424;8726424;8726424;8730599;8730599;8730599;8732113;8732113;8732113;8732796;8732796;8732796;8733595;8733595;8733595;8734654;8734654;8734654;8735145;8735145;8735145;8737754;8737754;8745525;8745525;8746083;8746083;8747403;8747403;8747862;8747862;8751712;8751712…	8660321;8664239;8666596;8669857;8670758;8677080;8678431;8681837;8683183;8686057;8708881;8712126;8712126;8712126;8717674;8717674;8717674;8726589;8726589;8726589;8730823;8730823;8730823;8732202;8732202;8732202;8732948;8732948;8732948;8733733;8733733;8733733;8734749;8734749;8734749;8735282;8735317;8735317;8737955;8737955;8745612;8745612;8746190;8746190;8747498;8747498;8748137;8748137;8751824;8751824…	-;-;-;-;-;-;-;-;-;-;-;-;-;-;-;-;-;-;-;-;-;-;-;-;-;-;-;-;-;-;-;-;-;-;-;-;-;-;-;-;-;-;-;-;-;-;-;-;-;-;-;-;-;-;-;-;-	6225	357	477	383	1107	1231	1284
CSbapl.523	BAPLcs_chr1;BAPLcs_chr1;BAPLcs_chr1;BAPLcs_chr1	8653207;8653207;8656086;8656086	8653861;8653861;8656711;8656711	+;+;+;+	1281	49	71	33	60	118	120
CSbapl.524	BAPLcs_chr1;BAPLcs_chr1;BAPLcs_chr1;BAPLcs_chr1;BAPLcs_chr1;BAPLcs_chr1;BAPLcs_chr1;BAPLcs_chr1;BAPLcs_chr1;BAPLcs_chr1;BAPLcs_chr1;BAPLcs_chr1;BAPLcs_chr1;BAPLcs_chr1;BAPLcs_chr1;BAPLcs_chr1;BAPLcs_chr1;BAPLcs_chr1;BAPLcs_chr1;BAPLcs_chr1;BAPLcs_chr1;BAPLcs_chr1;BAPLcs_chr1;BAPLcs_chr1;BAPLcs_chr1;BAPLcs_chr1;BAPLcs_chr1;BAPLcs_chr1;BAPLcs_chr1;BAPLcs_chr1;BAPLcs_chr1;BAPLcs_chr1;BAPLcs_chr1	8802199;8804105;8809112;8809112;8809857;8809857;8809890;8809890;8812596;8812596;8812596;8812596;8812619;8813617;8813617;8813617;8813617;8813617;8814341;8814341;8814341;8814341;8814341;8815418;8815418;8815418;8815418;8815418;8817001;8817001;8817001;8817001;8817001	8802201;8804107;8809210;8809210;8809953;8809953;8809953;8809953;8812771;8812771;8812771;8812771;8812771;8813739;8813739;8813739;8813739;8813739;8814517;8814517;8814517;8814517;8814517;8815531;8815531;8815531;8815531;8815531;8817213;8817213;8817213;8817213;8817213	+;+;+;+;+;+;+;+;+;+;+;+;+;+;+;+;+;+;+;+;+;+;+;+;+;+;+;+;+;+;+;+;+	1005	3278	3328	2434	1637	2595	2679
CSbapl.527	BAPLcs_chr1;BAPLcs_chr1;BAPLcs_chr1	8828230;8829413;8836286	8828419;8829618;8836441	-;-;-	552	6	14	8	13	17	0
CSbapl.528	BAPLcs_chr1;BAPLcs_chr1;BAPLcs_chr1;BAPLcs_chr1;BAPLcs_chr1;BAPLcs_chr1;BAPLcs_chr1;BAPLcs_chr1;BAPLcs_chr1	8836985;8836985;8837953;8837953;8838775;8838775;8839380;8839380;8840208	8837211;8837211;8838118;8838118;8838904;8838904;8839633;8839526;8840368	+;+;+;+;+;+;+;+;+	938	1322	1992	950	4474	5090	7094
CSbapl.529	BAPLcs_chr1;BAPLcs_chr1;BAPLcs_chr1;BAPLcs_chr1;BAPLcs_chr1;BAPLcs_chr1;BAPLcs_chr1;BAPLcs_chr1;BAPLcs_chr1;BAPLcs_chr1;BAPLcs_chr1;BAPLcs_chr1;BAPLcs_chr1	8850136;8854052;8855470;8858149;8858219;8858219;8858219;8860011;8860011;8860011;8864868;8864868;8864868	8850247;8854197;8855554;8858213;8858281;8858281;8858281;8860086;8860086;8860086;8865160;8865160;8865160	+;+;+;+;+;+;+;+;+;+;+;+;+	840	275	277	190	288	264	349
CSbapl.531	BAPLcs_chr1	8876153	8881000	-	4848	17	2	0	1	0	4
CSbapl.538	BAPLcs_chr1	8929634	8932792	+	3159	12	5	0	2	2	5
CSbapl.540	BAPLcs_chr1;BAPLcs_chr1	8943774;8948812	8944066;8948854	-;-	336	64	61	30	69	22	79
CSbapl.541	BAPLcs_chr1;BAPLcs_chr1;BAPLcs_chr1;BAPLcs_chr1;BAPLcs_chr1;BAPLcs_chr1;BAPLcs_chr1	8969067;8971432;8971459;8972572;8972572;8973605;8973605	8969384;8971638;8971638;8972673;8972673;8973961;8973961	-;-;-;-;-;-;-	984	147	104	135	89	32	69
CSbapl.542	BAPLcs_chr1	8978446	8978979	+	534	86	13	43	32	6	20
CSbapl.543	BAPLcs_chr1;BAPLcs_chr1	8989287;8990915	8989901;8991922	+;+	1623	2	2	2	73	42	92
CSbapl.544	BAPLcs_chr1;BAPLcs_chr1;BAPLcs_chr1	8998627;9000737;9001014	8999253;9001000;9001745	+;+;+	1623	4	2	0	7	0	20
CSbapl.545	BAPLcs_chr1	9004634	9005137	+	504	0	0	0	1	1	0
CSbapl.546	BAPLcs_chr1;BAPLcs_chr1;BAPLcs_chr1;BAPLcs_chr1;BAPLcs_chr1;BAPLcs_chr1;BAPLcs_chr1;BAPLcs_chr1;BAPLcs_chr1;BAPLcs_chr1;BAPLcs_chr1;BAPLcs_chr1	9009959;9012891;9013511;9014015;9014763;9015796;9016447;9017743;9018459;9019759;9021009;9022049	9010124;9012967;9013575;9014148;9014953;9015931;9016557;9017858;9018586;9019803;9021153;9022213	-;-;-;-;-;-;-;-;-;-;-;-	1479	32	58	32	42	31	131
CSbapl.547	BAPLcs_chr1;BAPLcs_chr1;BAPLcs_chr1;BAPLcs_chr1;BAPLcs_chr1	9025502;9030141;9033017;9034463;9035247	9025684;9030277;9033098;9034643;9036166	+;+;+;+;+	1503	32	18	23	214	114	167
CSbapl.549	BAPLcs_chr1;BAPLcs_chr1;BAPLcs_chr1;BAPLcs_chr1;BAPLcs_chr1;BAPLcs_chr1;BAPLcs_chr1;BAPLcs_chr1;BAPLcs_chr1;BAPLcs_chr1;BAPLcs_chr1;BAPLcs_chr1;BAPLcs_chr1;BAPLcs_chr1;BAPLcs_chr1;BAPLcs_chr1;BAPLcs_chr1;BAPLcs_chr1;BAPLcs_chr1;BAPLcs_chr1;BAPLcs_chr1;BAPLcs_chr1;BAPLcs_chr1;BAPLcs_chr1;BAPLcs_chr1;BAPLcs_chr1;BAPLcs_chr1;BAPLcs_chr1;BAPLcs_chr1;BAPLcs_chr1;BAPLcs_chr1;BAPLcs_chr1;BAPLcs_chr1;BAP…	9045507;9048845;9049806;9054233;9054914;9056048;9056729;9058043;9058595;9059508;9061138;9064881;9065496;9067513;9068866;9070754;9071575;9072380;9073282;9137102;9137810;9152790;9153573;9155666;9157555;9161258;9163796;9167089;9184719;9184719;9184719;9189444;9189444;9189444;9190913;9190913;9190913;9191809;9191809;9191809;9193064;9193064;9193064;9195836;9195836;9195836;9197303;9197303;9197303;9198213…	9045743;9048932;9049859;9054412;9055065;9056102;9056859;9058124;9058668;9059625;9061221;9064921;9065675;9067626;9069043;9070905;9071606;9072495;9073361;9137731;9137908;9152843;9153653;9155769;9157667;9161338;9163868;9167155;9185137;9185137;9185137;9189681;9189681;9189681;9191029;9191029;9191029;9191981;9191981;9191981;9193181;9193181;9193181;9196018;9196018;9196018;9197458;9197458;9197458;9198314…	-;-;-;-;-;-;-;-;-;-;-;-;-;-;-;-;-;-;-;-;-;-;-;-;-;-;-;-;-;-;-;-;-;-;-;-;-;-;-;-;-;-;-;-;-;-;-;-;-;-;-;-;-;-;-;-;-;-;-;-;-;-;-;-;-;-;-;-;-;-;-;-;-;-;-;-;-;-;-;-;-;-;-;-;-;-;-;-;-;-;-;-;-;-;-;-;-;-;-;-;-;-;-;-;-;-	7788	2813	4000	2323	2509	3229	3589
CSbapl.551	BAPLcs_chr1;BAPLcs_chr1;BAPLcs_chr1;BAPLcs_chr1;BAPLcs_chr1;BAPLcs_chr1;BAPLcs_chr1;BAPLcs_chr1	9167493;9167493;9170513;9170513;9171404;9171404;9171852;9173049	9167762;9167762;9170563;9170563;9171844;9171844;9172205;9173099	+;+;+;+;+;+;+;+	1167	41	107	28	119	105	58
CSbapl.552	BAPLcs_chr1;BAPLcs_chr1;BAPLcs_chr1;BAPLcs_chr1;BAPLcs_chr1;BAPLcs_chr1;BAPLcs_chr1;BAPLcs_chr1;BAPLcs_chr1;BAPLcs_chr1;BAPLcs_chr1;BAPLcs_chr1;BAPLcs_chr1;BAPLcs_chr1;BAPLcs_chr1;BAPLcs_chr1;BAPLcs_chr1;BAPLcs_chr1;BAPLcs_chr1;BAPLcs_chr1	9239807;9239807;9240572;9240572;9245023;9245023;9251094;9251094;9252031;9252031;9255710;9255710;9256636;9256636;9257712;9257712;9262567;9262567;9263433;9263433	9239922;9239922;9240635;9240635;9245076;9245076;9251148;9251148;9252121;9252121;9255753;9255753;9256764;9256764;9257834;9257834;9262684;9262684;9263526;9263526	+;+;+;+;+;+;+;+;+;+;+;+;+;+;+;+;+;+;+;+	888	45	69	35	26	68	74
CSbapl.553	BAPLcs_chr1;BAPLcs_chr1;BAPLcs_chr1;BAPLcs_chr1;BAPLcs_chr1;BAPLcs_chr1;BAPLcs_chr1;BAPLcs_chr1;BAPLcs_chr1	9279905;9287970;9292425;9293209;9294138;9294555;9295257;9297963;9299466	9280202;9288137;9292489;9293309;9294244;9294600;9297064;9298058;9300448	+;+;+;+;+;+;+;+;+	3672	809	913	801	1139	939	1095
CSbapl.555	BAPLcs_chr1;BAPLcs_chr1;BAPLcs_chr1;BAPLcs_chr1;BAPLcs_chr1;BAPLcs_chr1	9306302;9312750;9314671;9315877;9316746;9322193	9306337;9312914;9314810;9315992;9317377;9322285	-;-;-;-;-;-	1182	619	432	510	3727	2497	3678
CSbapl.559	BAPLcs_chr1;BAPLcs_chr1;BAPLcs_chr1;BAPLcs_chr1	9351820;9365984;9367751;9367751	9353179;9366011;9368505;9368505	+;+;+;+	2143	369	405	369	571	594	603
CSbapl.560	BAPLcs_chr1;BAPLcs_chr1;BAPLcs_chr1;BAPLcs_chr1;BAPLcs_chr1;BAPLcs_chr1;BAPLcs_chr1;BAPLcs_chr1;BAPLcs_chr1;BAPLcs_chr1;BAPLcs_chr1;BAPLcs_chr1	9385365;9385955;9387913;9391346;9394029;9395051;9395138;9395878;9396533;9398053;9476492;9477637	9385406;9386099;9388128;9391554;9394298;9395716;9395646;9396057;9396839;9398249;9479326;9479326	+;+;+;+;+;+;+;+;+;+;+;+	5067	119	122	79	114	93	144
CSbapl.561	BAPLcs_chr1	9388689	9389816	-	1128	11	0	5	7	8	2
CSbapl.562	BAPLcs_chr1;BAPLcs_chr1;BAPLcs_chr1	9402167;9405312;9407564	9402289;9405512;9407671	-;-;-	432	28	108	42	32	66	110
CSbapl.563	BAPLcs_chr1;BAPLcs_chr1;BAPLcs_chr1;BAPLcs_chr1;BAPLcs_chr1;BAPLcs_chr1;BAPLcs_chr1;BAPLcs_chr1;BAPLcs_chr1;BAPLcs_chr1;BAPLcs_chr1;BAPLcs_chr1;BAPLcs_chr1;BAPLcs_chr1;BAPLcs_chr1;BAPLcs_chr1;BAPLcs_chr1;BAPLcs_chr1;BAPLcs_chr1;BAPLcs_chr1;BAPLcs_chr1;BAPLcs_chr1;BAPLcs_chr1;BAPLcs_chr1;BAPLcs_chr1;BAPLcs_chr1;BAPLcs_chr1;BAPLcs_chr1;BAPLcs_chr1;BAPLcs_chr1;BAPLcs_chr1;BAPLcs_chr1;BAPLcs_chr1;BAP…	9410005;9410038;9411862;9411862;9412593;9412593;9415430;9415430;9416261;9416261;9416981;9416981;9418224;9418224;9422034;9422034;9423954;9423954;9424875;9424875;9426716;9426716;9428237;9428237;9429816;9429816;9430947;9430947;9431849;9431849;9432387;9432387;9433568;9433568;9435211;9435211;9436198;9436198;9438635;9438635;9439499;9439499;9440038;9440038;9441357;9441357;9451333;9451369;9451369;9453573…	9410334;9410334;9411963;9411963;9412760;9412760;9415556;9415556;9416297;9416297;9417197;9417197;9418429;9418429;9422160;9422160;9424136;9424136;9424942;9424942;9426783;9426783;9428329;9428329;9429922;9429922;9431027;9431027;9432063;9432063;9432519;9432519;9433725;9433725;9435365;9435365;9436340;9436340;9438836;9438836;9439589;9439589;9440210;9440210;9441457;9441457;9451530;9451530;9451530;9453683…	-;-;-;-;-;-;-;-;-;-;-;-;-;-;-;-;-;-;-;-;-;-;-;-;-;-;-;-;-;-;-;-;-;-;-;-;-;-;-;-;-;-;-;-;-;-;-;-;-;-;-;-;-;-;-;-;-;-;-;-;-;-;-;-;-;-;-;-;-;-;-;-;-;-;-;-;-;-;-;-	9228	236	684	109	354	208	256
CSbapl.564	BAPLcs_chr1;BAPLcs_chr1;BAPLcs_chr1;BAPLcs_chr1;BAPLcs_chr1;BAPLcs_chr1;BAPLcs_chr1;BAPLcs_chr1;BAPLcs_chr1;BAPLcs_chr1;BAPLcs_chr1;BAPLcs_chr1;BAPLcs_chr1;BAPLcs_chr1;BAPLcs_chr1;BAPLcs_chr1;BAPLcs_chr1;BAPLcs_chr1;BAPLcs_chr1;BAPLcs_chr1;BAPLcs_chr1;BAPLcs_chr1;BAPLcs_chr1;BAPLcs_chr1;BAPLcs_chr1;BAPLcs_chr1;BAPLcs_chr1;BAPLcs_chr1;BAPLcs_chr1;BAPLcs_chr1;BAPLcs_chr1;BAPLcs_chr1;BAPLcs_chr1;BAP…	9533613;9533613;9569485;9569485;9569539;9569539;9569539;9569539;9571636;9571636;9571636;9571636;9571636;9571636;9572426;9572426;9572426;9572426;9572426;9572426;9573673;9573673;9573673;9573673;9573673;9573673;9574294;9574294;9574294;9574294;9574294;9574294;9575046;9575046;9575046;9575046;9575046;9575046;9577559;9577559;9577559;9577559;9577559;9577559;9578534;9578534;9578534;9578534;9578534;9578534…	9533672;9533672;9569595;9569595;9569595;9569595;9569595;9569595;9571797;9571797;9571797;9571797;9571797;9571797;9572526;9572526;9572526;9572526;9572526;9572526;9573845;9573845;9573845;9573845;9573845;9573845;9574384;9574384;9574384;9574384;9574384;9574384;9575247;9575247;9575247;9575247;9575247;9575247;9577701;9577701;9577701;9577701;9577701;9577701;9578688;9578688;9578688;9578688;9578688;9578688…	+;+;+;+;+;+;+;+;+;+;+;+;+;+;+;+;+;+;+;+;+;+;+;+;+;+;+;+;+;+;+;+;+;+;+;+;+;+;+;+;+;+;+;+;+;+;+;+;+;+;+;+;+;+;+;+;+;+;+;+;+;+;+;+;+;+;+;+;+;+;+;+;+;+;+;+;+;+;+;+;+;+;+;+;+;+;+;+;+;+;+;+;+;+;+;+;+;+;+;+;+;+;+;+;+;+;+;+;+;+;+;+;+;+;+;+;+;+;+;+;+;+;+;+;+;+;+;+;+;+;+;+;+;+;+;+;+;+;+;+;+;+;+;+;+;+;+;+;+;+;+;+;+;+;+;+;+;+;+;+;+;+;+;+;+;+;+;+;+	4597	157	394	151	238	269	249
CSbapl.565	BAPLcs_chr1;BAPLcs_chr1;BAPLcs_chr1;BAPLcs_chr1;BAPLcs_chr1;BAPLcs_chr1;BAPLcs_chr1;BAPLcs_chr1;BAPLcs_chr1;BAPLcs_chr1;BAPLcs_chr1;BAPLcs_chr1;BAPLcs_chr1;BAPLcs_chr1;BAPLcs_chr1;BAPLcs_chr1;BAPLcs_chr1;BAPLcs_chr1;BAPLcs_chr1	9633614;9634929;9635957;9639158;9640873;9642538;9642552;9647640;9647640;9649549;9649549;9650703;9650703;9651777;9651777;9653460;9653460;9654548;9654548	9633730;9635324;9636092;9639245;9640971;9642614;9642648;9647710;9647710;9649630;9649630;9650760;9650760;9651867;9651867;9653554;9653554;9654824;9654824	-;-;-;-;-;-;-;-;-;-;-;-;-;-;-;-;-;-;-	1621	202	193	202	433	248	307
CSbapl.566	BAPLcs_chr1;BAPLcs_chr1;BAPLcs_chr1;BAPLcs_chr1;BAPLcs_chr1;BAPLcs_chr1;BAPLcs_chr1;BAPLcs_chr1;BAPLcs_chr1;BAPLcs_chr1;BAPLcs_chr1;BAPLcs_chr1;BAPLcs_chr1;BAPLcs_chr1;BAPLcs_chr1;BAPLcs_chr1;BAPLcs_chr1;BAPLcs_chr1;BAPLcs_chr1;BAPLcs_chr1;BAPLcs_chr1;BAPLcs_chr1;BAPLcs_chr1;BAPLcs_chr1;BAPLcs_chr1;BAPLcs_chr1;BAPLcs_chr1;BAPLcs_chr1;BAPLcs_chr1;BAPLcs_chr1;BAPLcs_chr1;BAPLcs_chr1;BAPLcs_chr1;BAP…	9654930;9654936;9654936;9656830;9656830;9656830;9662495;9662495;9662495;9663935;9663935;9663935;9664773;9664773;9664773;9665350;9665350;9665350;9666211;9666211;9666215;9702260;9702260;9702260;9702260;9702260;9702260;9703729;9703729;9703729;9703729;9703729;9703729;9705902;9705902;9705902;9705902;9705902;9705902;9707193;9707193;9707193;9707193;9707193;9707193;9711793;9711793;9711793;9711793;9711793…	9655136;9655136;9655136;9656979;9656979;9656979;9662578;9662578;9662578;9663995;9663995;9663995;9664890;9664890;9664890;9665420;9665420;9665424;9666278;9666278;9666278;9702610;9702610;9702610;9702610;9702610;9702610;9703883;9703883;9703883;9703883;9703883;9703883;9706056;9706056;9706056;9706056;9706056;9706056;9707507;9707507;9707507;9707507;9707507;9707507;9711932;9711932;9711932;9711932;9711932…	+;+;+;+;+;+;+;+;+;+;+;+;+;+;+;+;+;+;+;+;+;+;+;+;+;+;+;+;+;+;+;+;+;+;+;+;+;+;+;+;+;+;+;+;+;+;+;+;+;+;+;+;+;+;+;+;+;+;+;+;+;+;+;+;+;+;+;+;+;+;+;+;+;+;+;+;+;+;+;+;+;+;+;+;+;+;+;+;+;+;+;+;+;+;+;+;+;+;+;+;+;+;+;+;+;+;+;+;+;+;+;+;+;+;+;+;+;+;+;+;+;+;+;+;+;+;+;+;+;+;+;+;+;+;+;+;+;+;+;+;+;+;+;+;+;+;+;+;+;+;+;+;+;+;+;+;+;+;+;+;+;+;+;+;+;+;+;+;+;+;+;+;+;+;+;+;+;+;+;+;+;+;+;+;+;+;+;+;+;+;+;+;+;+;+;+;+;+;+;+…	15989	8402	7768	6015	9722	9322	11246
CSbapl.567	BAPLcs_chr1;BAPLcs_chr1;BAPLcs_chr1;BAPLcs_chr1;BAPLcs_chr1;BAPLcs_chr1;BAPLcs_chr1;BAPLcs_chr1;BAPLcs_chr1;BAPLcs_chr1;BAPLcs_chr1;BAPLcs_chr1;BAPLcs_chr1;BAPLcs_chr1;BAPLcs_chr1;BAPLcs_chr1;BAPLcs_chr1;BAPLcs_chr1;BAPLcs_chr1	9667973;9668338;9668641;9669234;9670453;9670930;9671983;9674949;9677748;9680398;9681639;9683690;9687031;9687810;9689731;9690538;9692101;9692924;9694076	9668083;9668433;9668685;9669326;9670508;9670990;9672032;9675057;9677808;9680475;9681694;9683773;9687119;9687883;9689819;9690612;9692227;9692985;9694474	-;-;-;-;-;-;-;-;-;-;-;-;-;-;-;-;-;-;-	1815	8	66	13	6456	7106	11963
CSbapl.568	BAPLcs_chr1;BAPLcs_chr1;BAPLcs_chr1;BAPLcs_chr1;BAPLcs_chr1;BAPLcs_chr1;BAPLcs_chr1;BAPLcs_chr1;BAPLcs_chr1;BAPLcs_chr1;BAPLcs_chr1;BAPLcs_chr1;BAPLcs_chr1;BAPLcs_chr1;BAPLcs_chr1;BAPLcs_chr1;BAPLcs_chr1;BAPLcs_chr1;BAPLcs_chr1;BAPLcs_chr1;BAPLcs_chr1;BAPLcs_chr1;BAPLcs_chr1;BAPLcs_chr1;BAPLcs_chr1;BAPLcs_chr1;BAPLcs_chr1;BAPLcs_chr1;BAPLcs_chr1;BAPLcs_chr1;BAPLcs_chr1;BAPLcs_chr1;BAPLcs_chr1;BAP…	9884938;9884938;9885612;9886299;9895398;9895948;9895948;9897355;9897355;9898297;9898297;9900255;9900282;9900282;9903049;9903049;9904940;9904940;9907355;9907355;9907355;9908145;9908145;9908145;9909908;9909908;9909908;9909910;9911660;9911660;9911660;9911660;9912120;9912120;9912120;9912120;9915294;9916308;9916308;9916308;9916308;9917201;9917201;9917201;9917201;9917881;9917881;9917881;9918549;9918549…	9885138;9885138;9885616;9886569;9895595;9896093;9896093;9897538;9897538;9898395;9898395;9900470;9900470;9900470;9903126;9903126;9905173;9905173;9907477;9907477;9907477;9908295;9908295;9908295;9910063;9910063;9910063;9910063;9911751;9911751;9911751;9911751;9912312;9912312;9912312;9912312;9915332;9916418;9916418;9916418;9916418;9917382;9917360;9917360;9917360;9918038;9918038;9918038;9918626;9918626…	-;-;-;-;-;-;-;-;-;-;-;-;-;-;-;-;-;-;-;-;-;-;-;-;-;-;-;-;-;-;-;-;-;-;-;-;-;-;-;-;-;-;-;-;-;-;-;-;-;-;-;-;-;-;-;-;-;-;-;-;-;-;-;-;-;-;-;-;-;-;-;-;-;-;-;-;-;-;-;-;-;-;-;-;-	4741	155	197	63	194	158	270
CSbapl.573	BAPLcs_chr1	9979648	9979962	-	315	6	1	0	4	0	2
CSbapl.578	BAPLcs_chr1	9995587	9995946	+	360	35	72	27	30	19	36
CSbapl.579	BAPLcs_chr1	10008401	10009009	-	609	0	4	0	5	5	15
CSbapl.587	BAPLcs_chr1;BAPLcs_chr1;BAPLcs_chr1;BAPLcs_chr1;BAPLcs_chr1;BAPLcs_chr1	10036067;10036067;10036676;10036676;10037880;10037880	10036205;10036205;10036776;10036776;10038110;10038110	+;+;+;+;+;+	471	58	59	25	31	96	113
CSbapl.593	BAPLcs_chr1;BAPLcs_chr1	10082571;10089879	10082766;10090324	+;+	642	30	58	79	33	16	18
CSbapl.594	BAPLcs_chr1;BAPLcs_chr1;BAPLcs_chr1;BAPLcs_chr1;BAPLcs_chr1;BAPLcs_chr1	10095790;10102594;10104784;10105451;10107061;10109864	10095970;10102705;10104940;10105556;10107265;10109990	-;-;-;-;-;-	888	31	49	39	34	61	52
CSbapl.599	BAPLcs_chr1;BAPLcs_chr1;BAPLcs_chr1;BAPLcs_chr1;BAPLcs_chr1;BAPLcs_chr1;BAPLcs_chr1;BAPLcs_chr1;BAPLcs_chr1;BAPLcs_chr1;BAPLcs_chr1;BAPLcs_chr1;BAPLcs_chr1;BAPLcs_chr1;BAPLcs_chr1;BAPLcs_chr1;BAPLcs_chr1;BAPLcs_chr1;BAPLcs_chr1;BAPLcs_chr1;BAPLcs_chr1;BAPLcs_chr1;BAPLcs_chr1	10176329;10176329;10176329;10184997;10184997;10184997;10189360;10189360;10189360;10196736;10196736;10196736;10201025;10201025;10201025;10219092;10219092;10219092;10228865;10228865;10228865;10238651;10239215	10176627;10176627;10176627;10185221;10185221;10185221;10189498;10189498;10189498;10196875;10196875;10196875;10201181;10201181;10201181;10219325;10219325;10219325;10228960;10228960;10228882;10239445;10239445	-;-;-;-;-;-;-;-;-;-;-;-;-;-;-;-;-;-;-;-;-;-;-	2085	164	242	95	423	609	626
CSbapl.601	BAPLcs_chr1;BAPLcs_chr1;BAPLcs_chr1;BAPLcs_chr1;BAPLcs_chr1;BAPLcs_chr1;BAPLcs_chr1;BAPLcs_chr1;BAPLcs_chr1	10239445;10244991;10246859;10247873;10249359;10250757;10252269;10254034;10255668	10239647;10245118;10247010;10248004;10249559;10250918;10252426;10254165;10255863	+;+;+;+;+;+;+;+;+	1464	45	21	37	9	28	31
CSbapl.606	BAPLcs_chr1;BAPLcs_chr1;BAPLcs_chr1;BAPLcs_chr1;BAPLcs_chr1;BAPLcs_chr1	10279799;10279799;10282779;10282779;10283707;10283707	10281537;10281537;10282863;10282863;10283838;10283838	-;-;-;-;-;-	1956	43	47	41	204	119	116
CSbapl.607	BAPLcs_chr1;BAPLcs_chr1;BAPLcs_chr1;BAPLcs_chr1;BAPLcs_chr1;BAPLcs_chr1;BAPLcs_chr1;BAPLcs_chr1;BAPLcs_chr1;BAPLcs_chr1;BAPLcs_chr1;BAPLcs_chr1;BAPLcs_chr1;BAPLcs_chr1;BAPLcs_chr1;BAPLcs_chr1	10297881;10297881;10299098;10299098;10299827;10299827;10300627;10300627;10302338;10302338;10302954;10302954;10305189;10305189;10311923;10311923	10298007;10298007;10299152;10299152;10299897;10299897;10300831;10300831;10302443;10302443;10303110;10303110;10305300;10305300;10312103;10312103	+;+;+;+;+;+;+;+;+;+;+;+;+;+;+;+	1014	97	92	65	177	170	132
CSbapl.608	BAPLcs_chr1;BAPLcs_chr1	10319715;10327278	10320160;10327473	-;-	642	77	62	86	37	20	34
CSbapl.611	BAPLcs_chr1;BAPLcs_chr1;BAPLcs_chr1;BAPLcs_chr1;BAPLcs_chr1;BAPLcs_chr1;BAPLcs_chr1;BAPLcs_chr1;BAPLcs_chr1;BAPLcs_chr1;BAPLcs_chr1;BAPLcs_chr1;BAPLcs_chr1;BAPLcs_chr1;BAPLcs_chr1;BAPLcs_chr1;BAPLcs_chr1;BAPLcs_chr1;BAPLcs_chr1;BAPLcs_chr1;BAPLcs_chr1;BAPLcs_chr1;BAPLcs_chr1;BAPLcs_chr1;BAPLcs_chr1;BAPLcs_chr1;BAPLcs_chr1;BAPLcs_chr1;BAPLcs_chr1;BAPLcs_chr1;BAPLcs_chr1;BAPLcs_chr1;BAPLcs_chr1;BAP…	10355731;10355731;10355731;10355731;10378871;10380944;10380944;10380944;10380944;10380944;10381011;10381011;10381011;10381946;10381946;10381946;10381946;10381946;10381946;10381946;10381946;10407777;10407777;10407777;10407777;10407777;10407777;10407777;10407777;10410636;10410636;10410636;10410636;10410636;10410636;10410636;10410636;10412055;10412055;10412055;10412055;10412055;10412055;10412055;104…	10355747;10355747;10355747;10355747;10378911;10381048;10381048;10381048;10381048;10381048;10381048;10381048;10381048;10382118;10382118;10382118;10382118;10382118;10382118;10382118;10382118;10407857;10407857;10407857;10407857;10407857;10407857;10407857;10407857;10410760;10410760;10410760;10410760;10410760;10410760;10410760;10410760;10412181;10412181;10412181;10412181;10412181;10412181;10412181;104…	+;+;+;+;+;+;+;+;+;+;+;+;+;+;+;+;+;+;+;+;+;+;+;+;+;+;+;+;+;+;+;+;+;+;+;+;+;+;+;+;+;+;+;+;+;+;+;+;+;+;+;+;+;+;+;+;+;+;+;+;+;+;+;+;+;+;+;+;+;+;+;+;+;+;+;+;+;+;+;+;+;+;+;+;+;+;+;+;+;+;+	2903	100	202	86	248	204	165
CSbapl.620	BAPLcs_chr1;BAPLcs_chr1;BAPLcs_chr1;BAPLcs_chr1;BAPLcs_chr1;BAPLcs_chr1;BAPLcs_chr1;BAPLcs_chr1;BAPLcs_chr1;BAPLcs_chr1;BAPLcs_chr1;BAPLcs_chr1;BAPLcs_chr1;BAPLcs_chr1;BAPLcs_chr1;BAPLcs_chr1;BAPLcs_chr1;BAPLcs_chr1;BAPLcs_chr1;BAPLcs_chr1;BAPLcs_chr1;BAPLcs_chr1;BAPLcs_chr1;BAPLcs_chr1;BAPLcs_chr1;BAPLcs_chr1;BAPLcs_chr1;BAPLcs_chr1;BAPLcs_chr1;BAPLcs_chr1;BAPLcs_chr1;BAPLcs_chr1;BAPLcs_chr1;BAP…	10591092;10592515;10596409;10598651;10599589;10601645;10602524;10640391;10640391;10640391;10651051;10677340;10677340;10677340;10677340;10678652;10678652;10678652;10678652;10681524;10681524;10681524;10681524;10693150;10693150;10693150;10693150;10695683;10695683;10695683;10695683;10702122;10702122;10702122;10702122;10705066;10705066;10705066;10705066;10707899;10707899;10707899;10707899;10710016;107…	10591226;10592598;10596488;10598674;10599882;10601683;10602599;10640413;10640413;10640413;10651085;10677539;10677539;10677539;10677539;10678776;10678776;10678776;10678776;10681703;10681703;10681703;10681703;10693349;10693349;10693349;10693349;10695789;10695789;10695789;10695789;10702269;10702269;10702269;10702269;10705289;10705289;10705289;10705289;10707994;10707994;10707994;10707994;10710143;107…	+;+;+;+;+;+;+;+;+;+;+;+;+;+;+;+;+;+;+;+;+;+;+;+;+;+;+;+;+;+;+;+;+;+;+;+;+;+;+;+;+;+;+;+;+;+;+;+;+;+;+;+;+;+;+;+;+;+;+;+;+;+;+;+;+;+;+	2891	1057	1633	593	813	1492	1367
CSbapl.622	BAPLcs_chr1;BAPLcs_chr1	10753843;10754909	10754444;10755479	-;-	1173	2	0	0	15	4	14
CSbapl.625	BAPLcs_chr1;BAPLcs_chr1;BAPLcs_chr1;BAPLcs_chr1;BAPLcs_chr1;BAPLcs_chr1;BAPLcs_chr1;BAPLcs_chr1;BAPLcs_chr1;BAPLcs_chr1;BAPLcs_chr1;BAPLcs_chr1;BAPLcs_chr1;BAPLcs_chr1;BAPLcs_chr1;BAPLcs_chr1;BAPLcs_chr1;BAPLcs_chr1;BAPLcs_chr1;BAPLcs_chr1;BAPLcs_chr1	10793400;10794253;10795227;10796155;10797273;10798280;10798328;10799126;10799126;10799619;10799619;10800361;10800361;10801840;10801844;10803190;10803190;10804218;10804218;10805026;10805026	10793588;10794396;10795309;10796250;10797342;10798413;10798413;10799216;10799216;10799741;10799741;10800515;10800511;10801915;10801915;10803261;10803261;10804310;10804310;10805272;10805272	+;+;+;+;+;+;+;+;+;+;+;+;+;+;+;+;+;+;+;+;+	1573	202	215	301	181	188	208
CSbapl.626	BAPLcs_chr1;BAPLcs_chr1;BAPLcs_chr1;BAPLcs_chr1;BAPLcs_chr1;BAPLcs_chr1;BAPLcs_chr1;BAPLcs_chr1;BAPLcs_chr1	10805980;10805980;10807112;10807112;10809164;10809164;10828453;10828453;10830561	10806124;10806124;10807274;10807274;10809372;10809372;10828565;10828565;10830590	-;-;-;-;-;-;-;-;-	660	76	54	56	87	88	98
CSbapl.627	BAPLcs_chr1;BAPLcs_chr1;BAPLcs_chr1;BAPLcs_chr1;BAPLcs_chr1	10832329;10834601;10836687;10839613;10840864	10832498;10834753;10836907;10839775;10841227	+;+;+;+;+	1071	119	93	88	106	109	91
CSbapl.628	BAPLcs_chr1;BAPLcs_chr1	10856605;10862910	10856794;10864369	+;+	1650	1	31	5	5	11	6
CSbapl.632	BAPLcs_chr1	10908722	10909297	-	576	6	2	0	0	0	0
CSbapl.635	BAPLcs_chr1;BAPLcs_chr1;BAPLcs_chr1;BAPLcs_chr1;BAPLcs_chr1;BAPLcs_chr1;BAPLcs_chr1;BAPLcs_chr1;BAPLcs_chr1;BAPLcs_chr1;BAPLcs_chr1;BAPLcs_chr1;BAPLcs_chr1;BAPLcs_chr1;BAPLcs_chr1;BAPLcs_chr1;BAPLcs_chr1;BAPLcs_chr1;BAPLcs_chr1;BAPLcs_chr1;BAPLcs_chr1;BAPLcs_chr1;BAPLcs_chr1;BAPLcs_chr1;BAPLcs_chr1;BAPLcs_chr1;BAPLcs_chr1;BAPLcs_chr1;BAPLcs_chr1;BAPLcs_chr1;BAPLcs_chr1;BAPLcs_chr1;BAPLcs_chr1;BAP…	10932493;10942351;10948750;10953890;10955445;10956046;10959859;10961304;10962833;10965392;10967234;10968381;10969255;10972923;10975563;10975890;10976697;10978517;10979144;10981586;10982551;10990131;10990686;10991940;10993295;10993840;10994519;10998109;11001251;11001809;11003519;11004346;11005175;11005879;11006715;11007222;11011031;11013376;11013979;11014765;11015892;11016581;11017409;11018093;110…	10932535;10942438;10949077;10953940;10955594;10956113;10960051;10961362;10962911;10965484;10967359;10968510;10969325;10973682;10975725;10976116;10976818;10978644;10979233;10981681;10982633;10990285;10990802;10992125;10993498;10994091;10994707;10998237;11001373;11001895;11003605;11004516;11005251;11005922;11006839;11007383;11011141;11013552;11014162;11014928;11015957;11016727;11017465;11018170;110…	+;+;+;+;+;+;+;+;+;+;+;+;+;+;+;+;+;+;+;+;+;+;+;+;+;+;+;+;+;+;+;+;+;+;+;+;+;+;+;+;+;+;+;+;+;+;+;+;+;+;+;+;+;+;+;+;+;+;+;+;+;+;+;+;+;+;+;+;+;+;+;+;+;+;+;+;+;+;+	10539	280	474	294	1492	1236	1091
CSbapl.638	BAPLcs_chr1;BAPLcs_chr1;BAPLcs_chr1;BAPLcs_chr1;BAPLcs_chr1;BAPLcs_chr1;BAPLcs_chr1;BAPLcs_chr1	11059526;11060685;11065647;11066265;11069377;11071445;11072938;11073349	11059750;11060786;11065796;11066335;11069497;11071530;11073048;11073370	-;-;-;-;-;-;-;-	888	734	952	431	308	675	736
CSbapl.639	BAPLcs_chr1;BAPLcs_chr1;BAPLcs_chr1;BAPLcs_chr1;BAPLcs_chr1;BAPLcs_chr1;BAPLcs_chr1;BAPLcs_chr1;BAPLcs_chr1;BAPLcs_chr1;BAPLcs_chr1;BAPLcs_chr1;BAPLcs_chr1;BAPLcs_chr1;BAPLcs_chr1;BAPLcs_chr1	11081635;11085615;11090408;11099392;11100242;11101215;11102159;11103252;11104262;11105107;11105600;11106346;11107827;11109173;11110201;11111010	11081751;11085732;11090598;11099577;11100385;11101311;11102231;11103321;11104395;11105197;11105722;11106500;11107898;11109244;11110293;11111256	+;+;+;+;+;+;+;+;+;+;+;+;+;+;+;+	1983	345	361	224	263	303	318
CSbapl.642	BAPLcs_chr1	11096942	11097244	-	303	6	0	8	0	2	0
CSbapl.643	BAPLcs_chr1;BAPLcs_chr1;BAPLcs_chr1;BAPLcs_chr1;BAPLcs_chr1;BAPLcs_chr1;BAPLcs_chr1;BAPLcs_chr1;BAPLcs_chr1	11111964;11111964;11113096;11113096;11115133;11115133;11128775;11128775;11130873	11112108;11112108;11113258;11113258;11115341;11115341;11128887;11128887;11130902	-;-;-;-;-;-;-;-;-	660	74	56	60	77	86	116
CSbapl.644	BAPLcs_chr1;BAPLcs_chr1;BAPLcs_chr1;BAPLcs_chr1;BAPLcs_chr1	11132642;11134913;11137167;11140093;11141343	11132811;11135065;11137387;11140255;11141706	+;+;+;+;+	1071	143	147	65	125	120	152
CSbapl.645	BAPLcs_chr1;BAPLcs_chr1;BAPLcs_chr1;BAPLcs_chr1;BAPLcs_chr1;BAPLcs_chr1;BAPLcs_chr1;BAPLcs_chr1;BAPLcs_chr1;BAPLcs_chr1;BAPLcs_chr1;BAPLcs_chr1;BAPLcs_chr1;BAPLcs_chr1;BAPLcs_chr1;BAPLcs_chr1;BAPLcs_chr1;BAPLcs_chr1;BAPLcs_chr1;BAPLcs_chr1;BAPLcs_chr1;BAPLcs_chr1;BAPLcs_chr1;BAPLcs_chr1;BAPLcs_chr1;BAPLcs_chr1;BAPLcs_chr1;BAPLcs_chr1;BAPLcs_chr1;BAPLcs_chr1;BAPLcs_chr1;BAPLcs_chr1;BAPLcs_chr1;BAP…	11146176;11146176;11147853;11147853;11148609;11148609;11149911;11149911;11150068;11150068;11151322;11151322;11153107;11153107;11154467;11154467;11155387;11155387;11157073;11157073;11158612;11158612;11159398;11159398;11166677;11166677;11168352;11168352;11170077;11170077;11175046;11175046;11175856;11175856;11176267;11176267;11176636;11176636;11177133;11177133;11179116;11179116;11181503;11181503;111…	11146341;11146341;11147989;11147989;11148733;11148733;11150007;11150007;11150102;11150102;11151490;11151490;11153188;11153188;11154654;11154654;11155470;11155470;11157222;11157222;11158846;11158846;11159469;11159469;11166843;11166843;11168534;11168534;11170272;11170272;11175209;11175209;11176002;11176002;11176364;11176364;11176884;11176884;11177337;11177337;11179212;11179212;11181638;11181638;111…	-;-;-;-;-;-;-;-;-;-;-;-;-;-;-;-;-;-;-;-;-;-;-;-;-;-;-;-;-;-;-;-;-;-;-;-;-;-;-;-;-;-;-;-;-;-;-;-;-;-;-;-;-;-	4575	616	506	522	234	210	309
CSbapl.646	BAPLcs_chr1;BAPLcs_chr1;BAPLcs_chr1;BAPLcs_chr1;BAPLcs_chr1;BAPLcs_chr1;BAPLcs_chr1;BAPLcs_chr1;BAPLcs_chr1;BAPLcs_chr1;BAPLcs_chr1;BAPLcs_chr1;BAPLcs_chr1;BAPLcs_chr1;BAPLcs_chr1;BAPLcs_chr1;BAPLcs_chr1;BAPLcs_chr1;BAPLcs_chr1;BAPLcs_chr1;BAPLcs_chr1;BAPLcs_chr1;BAPLcs_chr1;BAPLcs_chr1;BAPLcs_chr1;BAPLcs_chr1;BAPLcs_chr1;BAPLcs_chr1;BAPLcs_chr1;BAPLcs_chr1;BAPLcs_chr1;BAPLcs_chr1;BAPLcs_chr1;BAP…	11191892;11191892;11191892;11191892;11194984;11194984;11194984;11194984;11195077;11195077;11196005;11196005;11196005;11196005;11196005;11196005;11196567;11196567;11196567;11196567;11196567;11196567;11199473;11199473;11199473;11199473;11199473;11199473;11200198;11200198;11200198;11200198;11200198;11200198	11191894;11191894;11191894;11191894;11195080;11195080;11195080;11195080;11195080;11195080;11196051;11196051;11196051;11196051;11196051;11196051;11196699;11196699;11196699;11196699;11196699;11196699;11199546;11199546;11199546;11199546;11199546;11199546;11200266;11200266;11200266;11200266;11200266;11200266	+;+;+;+;+;+;+;+;+;+;+;+;+;+;+;+;+;+;+;+;+;+;+;+;+;+;+;+;+;+;+;+;+;+	423	64	94	41	208	186	149
CSbapl.647	BAPLcs_chr1;BAPLcs_chr1;BAPLcs_chr1;BAPLcs_chr1;BAPLcs_chr1;BAPLcs_chr1;BAPLcs_chr1;BAPLcs_chr1;BAPLcs_chr1;BAPLcs_chr1;BAPLcs_chr1;BAPLcs_chr1;BAPLcs_chr1;BAPLcs_chr1;BAPLcs_chr1;BAPLcs_chr1;BAPLcs_chr1;BAPLcs_chr1;BAPLcs_chr1;BAPLcs_chr1;BAPLcs_chr1;BAPLcs_chr1;BAPLcs_chr1;BAPLcs_chr1;BAPLcs_chr1;BAPLcs_chr1;BAPLcs_chr1;BAPLcs_chr1;BAPLcs_chr1;BAPLcs_chr1;BAPLcs_chr1;BAPLcs_chr1;BAPLcs_chr1;BAP…	11209706;11209706;11209706;11211069;11211069;11211069;11211990;11211990;11211990;11212919;11212919;11212919;11213974;11213974;11213974;11214934;11214934;11214934;11215510;11215510;11215510;11216026;11216026;11216026;11216360;11216360;11216360;11217010;11217010;11217010;11218030;11218030;11218030;11218634;11218634;11218634;11220142;11220142;11220142;11220471;11220471;11220471;11220839;11220839;112…	11209744;11209744;11209744;11211227;11211227;11211227;11212129;11212129;11212129;11213263;11213263;11213263;11214232;11214232;11214232;11215062;11215062;11215062;11215659;11215659;11215659;11216103;11216103;11216103;11216450;11216450;11216450;11217095;11217095;11217095;11218113;11218113;11218113;11218744;11218744;11218744;11220236;11220236;11220236;11220579;11220579;11220579;11221012;11221012;112…	-;-;-;-;-;-;-;-;-;-;-;-;-;-;-;-;-;-;-;-;-;-;-;-;-;-;-;-;-;-;-;-;-;-;-;-;-;-;-;-;-;-;-;-;-;-;-;-	2139	969	991	534	4160	4264	6549
CSbapl.649	BAPLcs_chr1;BAPLcs_chr1;BAPLcs_chr1;BAPLcs_chr1;BAPLcs_chr1;BAPLcs_chr1;BAPLcs_chr1;BAPLcs_chr1;BAPLcs_chr1;BAPLcs_chr1;BAPLcs_chr1;BAPLcs_chr1;BAPLcs_chr1;BAPLcs_chr1;BAPLcs_chr1;BAPLcs_chr1;BAPLcs_chr1;BAPLcs_chr1;BAPLcs_chr1;BAPLcs_chr1;BAPLcs_chr1;BAPLcs_chr1;BAPLcs_chr1;BAPLcs_chr1;BAPLcs_chr1;BAPLcs_chr1;BAPLcs_chr1;BAPLcs_chr1;BAPLcs_chr1;BAPLcs_chr1;BAPLcs_chr1;BAPLcs_chr1;BAPLcs_chr1;BAP…	11241557;11241557;11241557;11241557;11241557;11241557;11242867;11242867;11242867;11242867;11242867;11242867;11244074;11244074;11244074;11244074;11244074;11244074;11244977;11244977;11244977;11244977;11244977;11244977;11245947;11245947;11245947;11245947;11245947;11245947;11246758;11246758;11246758;11246758;11246758;11246758;11247374;11247374;11247374;11247374;11247374;11247374;11247964;11247964;112…	11241577;11241577;11241577;11241577;11241577;11241577;11242971;11242971;11242971;11242971;11242971;11242971;11244163;11244163;11244163;11244163;11244163;11244163;11245063;11245063;11245063;11245063;11245063;11245063;11246036;11246036;11246036;11246036;11246036;11246036;11246799;11246799;11246799;11246799;11246799;11246799;11247508;11247508;11247508;11247508;11247508;11247508;11248054;11248054;112…	-;-;-;-;-;-;-;-;-;-;-;-;-;-;-;-;-;-;-;-;-;-;-;-;-;-;-;-;-;-;-;-;-;-;-;-;-;-;-;-;-;-;-;-;-;-;-;-;-;-;-;-;-;-;-;-;-;-;-;-;-;-;-;-;-;-;-;-;-;-;-;-;-;-;-;-;-;-;-;-;-;-;-;-	2100	490	436	383	869	1001	1139
CSbapl.655	BAPLcs_chr1	11302040	11304964	-	2925	90	109	109	359	209	302
CSbapl.657	BAPLcs_chr1;BAPLcs_chr1;BAPLcs_chr1;BAPLcs_chr1;BAPLcs_chr1;BAPLcs_chr1;BAPLcs_chr1;BAPLcs_chr1;BAPLcs_chr1;BAPLcs_chr1;BAPLcs_chr1;BAPLcs_chr1;BAPLcs_chr1;BAPLcs_chr1	11313301;11314056;11316555;11317482;11320513;11321295;11322134;11323262;11325390;11327037;11328497;11329453;11330129;11332152	11313423;11314491;11316727;11317559;11320671;11321426;11322360;11323359;11325556;11327243;11328719;11329586;11330261;11336749	+;+;+;+;+;+;+;+;+;+;+;+;+;+	6888	330	291	321	1064	1168	1742
CSbapl.660	BAPLcs_chr1;BAPLcs_chr1;BAPLcs_chr1;BAPLcs_chr1;BAPLcs_chr1;BAPLcs_chr1;BAPLcs_chr1;BAPLcs_chr1;BAPLcs_chr1;BAPLcs_chr1;BAPLcs_chr1;BAPLcs_chr1;BAPLcs_chr1;BAPLcs_chr1;BAPLcs_chr1;BAPLcs_chr1;BAPLcs_chr1;BAPLcs_chr1;BAPLcs_chr1;BAPLcs_chr1;BAPLcs_chr1;BAPLcs_chr1;BAPLcs_chr1;BAPLcs_chr1;BAPLcs_chr1;BAPLcs_chr1;BAPLcs_chr1;BAPLcs_chr1;BAPLcs_chr1;BAPLcs_chr1;BAPLcs_chr1;BAPLcs_chr1;BAPLcs_chr1;BAP…	11364833;11364833;11364833;11365566;11365566;11370080;11419512;11426993;11453458;11453458;11456309;11456309;11457188;11457188;11457969;11457969;11460267;11460267;11461141;11461141;11465190;11465190;11467366;11467366;11502605;11503472;11503484;11503484;11503484;11503484;11503484;11503484;11503484;11503484;11503484;11503873;11503881;11503881;11503881;11503881;11503881;11503881;11503881;11503881;115…	11365168;11365019;11365019;11365747;11365624;11370559;11419599;11427261;11453842;11453842;11456437;11456437;11457268;11457268;11458768;11458768;11460509;11460509;11461495;11461495;11465356;11465356;11467626;11467626;11502739;11503539;11503539;11503539;11503539;11503539;11503539;11503539;11503539;11503539;11503539;11503956;11503956;11503956;11503956;11503956;11503956;11503956;11503956;11503956;115…	+;+;+;+;+;+;+;+;+;+;+;+;+;+;+;+;+;+;+;+;+;+;+;+;+;+;+;+;+;+;+;+;+;+;+;+;+;+;+;+;+;+;+;+;+;+;+;+;+;+;+;+;+;+;+;+;+;+;+;+;+;+;+;+;+;+;+;+;+;+;+;+;+;+;+;+;+;+;+;+;+;+;+;+;+;+;+;+;+;+;+;+;+;+;+;+;+;+;+;+;+;+;+;+;+;+;+;+;+;+;+;+;+;+;+;+;+;+;+;+;+;+;+;+;+;+;+;+;+;+;+;+;+;+;+;+;+;+;+;+;+;+;+;+;+;+;+;+;+;+;+;+;+;+;+;+;+;+;+;+;+;+;+;+;+;+;+;+;+;+;+;+;+;+;+;+;+;+;+;+;+;+;+;+;+;+;+;+;+;+;+;+;+;+;+;+;+;+;+;+	12259	4566	6545	3149	4584	5791	6905
CSbapl.662	BAPLcs_chr1;BAPLcs_chr1;BAPLcs_chr1;BAPLcs_chr1;BAPLcs_chr1;BAPLcs_chr1;BAPLcs_chr1;BAPLcs_chr1;BAPLcs_chr1;BAPLcs_chr1;BAPLcs_chr1;BAPLcs_chr1;BAPLcs_chr1;BAPLcs_chr1;BAPLcs_chr1;BAPLcs_chr1;BAPLcs_chr1;BAPLcs_chr1;BAPLcs_chr1;BAPLcs_chr1;BAPLcs_chr1;BAPLcs_chr1;BAPLcs_chr1;BAPLcs_chr1;BAPLcs_chr1;BAPLcs_chr1;BAPLcs_chr1;BAPLcs_chr1;BAPLcs_chr1;BAPLcs_chr1;BAPLcs_chr1;BAPLcs_chr1;BAPLcs_chr1;BAP…	11427848;11427848;11427848;11427848;11428594;11428594;11428594;11428594;11430189;11430189;11430189;11430189;11430955;11430955;11430975;11430975;11430975;11432647;11432659;11432659;11432659;11432659;11432659;11433708;11433708;11433708;11433708;11433708;11433708;11434756;11434756;11434756;11434756;11434756;11434756;11435837;11435927;11435927;11435927;11435927;11435927;11435927;11439180;11439180;114…	11427925;11427925;11427925;11427925;11428762;11428762;11428762;11428762;11430333;11430304;11430333;11430333;11431056;11431056;11431056;11431056;11431056;11432868;11432868;11432868;11432868;11432868;11432868;11433862;11433862;11433862;11433862;11433862;11433862;11434886;11434886;11434886;11434886;11434886;11434886;11435902;11435996;11435996;11435996;11435996;11435996;11435982;11439297;11439297;114…	-;-;-;-;-;-;-;-;-;-;-;-;-;-;-;-;-;-;-;-;-;-;-;-;-;-;-;-;-;-;-;-;-;-;-;-;-;-;-;-;-;-;-;-;-;-;-;-;-	1748	1819	1912	1482	613	782	966
CSbapl.663	BAPLcs_chr1;BAPLcs_chr1;BAPLcs_chr1;BAPLcs_chr1;BAPLcs_chr1;BAPLcs_chr1;BAPLcs_chr1;BAPLcs_chr1;BAPLcs_chr1;BAPLcs_chr1;BAPLcs_chr1;BAPLcs_chr1;BAPLcs_chr1;BAPLcs_chr1	11474844;11474844;11484217;11484217;11484997;11484997;11487523;11487523;11488461;11488461;11490543;11490543;11492360;11492360	11475068;11475068;11484367;11484367;11485125;11485125;11487688;11487688;11488664;11488664;11490886;11490886;11492658;11492658	-;-;-;-;-;-;-;-;-;-;-;-;-;-	1518	228	255	190	621	483	540
CSbapl.664	BAPLcs_chr1;BAPLcs_chr1	11540341;11542511	11540894;11542601	-;-	645	180	150	64	87	81	180
CSbapl.665	BAPLcs_chr1;BAPLcs_chr1;BAPLcs_chr1;BAPLcs_chr1;BAPLcs_chr1;BAPLcs_chr1;BAPLcs_chr1;BAPLcs_chr1;BAPLcs_chr1;BAPLcs_chr1;BAPLcs_chr1;BAPLcs_chr1;BAPLcs_chr1;BAPLcs_chr1;BAPLcs_chr1;BAPLcs_chr1;BAPLcs_chr1;BAPLcs_chr1;BAPLcs_chr1;BAPLcs_chr1;BAPLcs_chr1;BAPLcs_chr1;BAPLcs_chr1;BAPLcs_chr1;BAPLcs_chr1;BAPLcs_chr1;BAPLcs_chr1;BAPLcs_chr1;BAPLcs_chr1;BAPLcs_chr1	11558319;11558319;11559120;11559120;11561618;11561618;11562703;11562703;11564088;11564088;11565187;11565187;11565821;11565821;11566581;11566581;11567595;11567595;11568905;11568905;11569604;11569604;11570883;11570883;11572719;11572719;11573859;11573859;11580342;11587828	11558369;11558369;11560159;11560159;11561732;11561732;11562792;11562792;11564200;11564200;11565291;11565291;11565924;11565924;11566654;11566654;11567689;11567689;11568970;11568970;11569786;11569786;11570978;11570978;11572755;11572755;11573947;11573947;11580642;11587888	-;-;-;-;-;-;-;-;-;-;-;-;-;-;-;-;-;-;-;-;-;-;-;-;-;-;-;-;-;-	2620	554	564	522	824	1062	1046
CSbapl.666	BAPLcs_chr1	11580686	11581264	-	579	41	36	48	134	128	105
CSbapl.667	BAPLcs_chr1;BAPLcs_chr1;BAPLcs_chr1;BAPLcs_chr1	11613357;11614434;11615104;11617072	11613471;11614543;11615120;11617168	-;-;-;-	339	57	53	71	88	47	67
CSbapl.668	BAPLcs_chr1	11629848	11630207	+	360	1	2	0	2	0	2
CSbapl.669	BAPLcs_chr1;BAPLcs_chr1;BAPLcs_chr1;BAPLcs_chr1;BAPLcs_chr1;BAPLcs_chr1;BAPLcs_chr1;BAPLcs_chr1;BAPLcs_chr1;BAPLcs_chr1;BAPLcs_chr1;BAPLcs_chr1;BAPLcs_chr1;BAPLcs_chr1;BAPLcs_chr1	11700469;11701184;11701928;11704087;11705556;11707647;11708603;11710506;11711380;11712832;11715116;11715772;11716718;11718131;11720518	11700600;11701300;11702027;11704214;11705622;11707755;11708681;11710590;11711463;11712901;11715191;11715891;11716873;11718220;11720559	-;-;-;-;-;-;-;-;-;-;-;-;-;-;-	1455	35	59	35	72	102	71
CSbapl.672	BAPLcs_chr1;BAPLcs_chr1;BAPLcs_chr1;BAPLcs_chr1;BAPLcs_chr1;BAPLcs_chr1;BAPLcs_chr1;BAPLcs_chr1;BAPLcs_chr1;BAPLcs_chr1;BAPLcs_chr1;BAPLcs_chr1;BAPLcs_chr1;BAPLcs_chr1;BAPLcs_chr1;BAPLcs_chr1;BAPLcs_chr1;BAPLcs_chr1;BAPLcs_chr1;BAPLcs_chr1;BAPLcs_chr1;BAPLcs_chr1;BAPLcs_chr1;BAPLcs_chr1;BAPLcs_chr1;BAPLcs_chr1;BAPLcs_chr1;BAPLcs_chr1;BAPLcs_chr1;BAPLcs_chr1;BAPLcs_chr1;BAPLcs_chr1;BAPLcs_chr1;BAP…	11731543;11731543;11731543;11743120;11743120;11743120;11748758;11748758;11748758;11751133;11751133;11751133;11752497;11752497;11752497;11753749;11753749;11753749;11757396;11760275;11760275;11760275;11761569;11761569;11770450;11770450;11770450;11771492;11771492;11771492;11772291;11772291;11772291;11773525;11773525;11773525;11774132;11774132;11774132;11777503;11777503;11777503;11778049;11778049;117…	11731623;11731623;11731623;11743200;11743200;11743200;11748876;11748876;11748876;11751241;11751241;11751241;11752601;11752601;11752601;11753847;11753847;11753847;11757416;11760355;11760355;11760355;11761625;11761625;11770525;11770525;11770525;11771586;11771586;11771586;11772404;11772404;11772404;11773609;11773609;11773609;11774211;11774211;11774211;11777571;11777571;11777571;11778229;11778229;117…	+;+;+;+;+;+;+;+;+;+;+;+;+;+;+;+;+;+;+;+;+;+;+;+;+;+;+;+;+;+;+;+;+;+;+;+;+;+;+;+;+;+;+;+;+;+;+;+;+;+;+;+;+;+;+;+;+;+;+;+;+;+;+;+;+;+;+;+;+;+;+;+;+;+;+	2862	103	227	32	174	189	313
CSbapl.676	BAPLcs_chr1;BAPLcs_chr1;BAPLcs_chr1;BAPLcs_chr1;BAPLcs_chr1;BAPLcs_chr1;BAPLcs_chr1;BAPLcs_chr1;BAPLcs_chr1;BAPLcs_chr1;BAPLcs_chr1;BAPLcs_chr1;BAPLcs_chr1	11851921;11852707;11854064;11860319;11861110;11863140;11865417;11868821;11869452;11872532;11885677;11890072;11899147	11852209;11852871;11854297;11860419;11861325;11863315;11865505;11868897;11869489;11872640;11885862;11890176;11899320	-;-;-;-;-;-;-;-;-;-;-;-;-	1959	149	674	105	31	63	58
CSbapl.680	BAPLcs_chr1	11934548	11935363	-	816	0	0	0	0	1	2
CSbapl.687	BAPLcs_chr1;BAPLcs_chr1;BAPLcs_chr1;BAPLcs_chr1;BAPLcs_chr1;BAPLcs_chr1;BAPLcs_chr1;BAPLcs_chr1;BAPLcs_chr1;BAPLcs_chr1;BAPLcs_chr1;BAPLcs_chr1;BAPLcs_chr1;BAPLcs_chr1;BAPLcs_chr1;BAPLcs_chr1;BAPLcs_chr1;BAPLcs_chr1;BAPLcs_chr1;BAPLcs_chr1;BAPLcs_chr1;BAPLcs_chr1;BAPLcs_chr1;BAPLcs_chr1;BAPLcs_chr1;BAPLcs_chr1;BAPLcs_chr1;BAPLcs_chr1;BAPLcs_chr1;BAPLcs_chr1;BAPLcs_chr1;BAPLcs_chr1;BAPLcs_chr1;BAP…	11999913;11999913;12004490;12004490;12008837;12008837;12012914;12012914;12015398;12015398;12017474;12017474;12021040;12021040;12021999;12021999;12023372;12023372;12028529;12028529;12030755;12030755;12032980;12032980;12034115;12034115;12034891;12034891;12035707;12035707;12036910;12036910;12038420;12038420;12040472;12040472;12042590;12042590;12043632;12043632;12043937;12043937;12044842;12044842;120…	12000069;12000069;12004620;12004620;12008942;12008942;12013020;12013020;12015427;12015427;12017584;12017584;12021266;12021266;12022041;12022041;12023469;12023469;12028662;12028662;12030882;12030882;12033064;12033064;12034263;12034263;12035014;12035014;12035870;12035870;12037101;12037101;12038544;12038544;12040609;12040609;12042746;12042746;12043740;12043740;12044112;12044112;12044947;12044947;120…	+;+;+;+;+;+;+;+;+;+;+;+;+;+;+;+;+;+;+;+;+;+;+;+;+;+;+;+;+;+;+;+;+;+;+;+;+;+;+;+;+;+;+;+;+;+;+;+;+;+;+;+;+;+;+;+;+;+;+;+;+	3759	101	86	40	166	367	311
CSbapl.689	BAPLcs_chr1;BAPLcs_chr1;BAPLcs_chr1;BAPLcs_chr1	12075866;12079937;12081754;12085862	12076363;12080085;12081961;12086068	+;+;+;+	1062	0	106	23	9291	11942	17698
CSbapl.692	BAPLcs_chr1;BAPLcs_chr1;BAPLcs_chr1;BAPLcs_chr1	12090846;12093299;12097180;12100141	12091406;12093447;12097387;12100347	+;+;+;+	1125	6	109	52	9360	13819	17494
CSbapl.697	BAPLcs_chr1;BAPLcs_chr1;BAPLcs_chr1	12115804;12117969;12118878	12116328;12118117;12119052	+;+;+	849	2	103	34	5137	11877	14787
CSbapl.698	BAPLcs_chr1	12123280	12124647	-	1368	0	0	0	90	68	62
CSbapl.700	BAPLcs_chr1;BAPLcs_chr1;BAPLcs_chr1;BAPLcs_chr1	12136700;12138241;12139297;12154312	12137175;12138312;12139361;12154553	-;-;-;-	855	0	3	0	39	9	27
CSbapl.701	BAPLcs_chr1;BAPLcs_chr1;BAPLcs_chr1;BAPLcs_chr1	12167548;12168976;12170281;12172626	12167838;12169124;12170488;12173177	+;+;+;+	1200	2	26	4	1731	2660	3068
CSbapl.702	BAPLcs_chr1;BAPLcs_chr1;BAPLcs_chr1;BAPLcs_chr1	12187915;12189343;12190648;12192990	12188205;12189491;12190855;12193541	+;+;+;+	1200	0	22	1	1840	1768	2338
CSbapl.708	BAPLcs_chr1	12236909	12237457	+	549	14	12	7	6	3	2
CSbapl.711	BAPLcs_chr1;BAPLcs_chr1;BAPLcs_chr1;BAPLcs_chr1	12283286;12283286;12290237;12290237	12286183;12286183;12291367;12291367	+;+;+;+	4029	81	119	7	17	24	36
CSbapl.712	BAPLcs_chr1	12268523	12269608	+	1086	42	37	9	4	3	2
CSbapl.715	BAPLcs_chr1;BAPLcs_chr1;BAPLcs_chr1;BAPLcs_chr1;BAPLcs_chr1;BAPLcs_chr1;BAPLcs_chr1;BAPLcs_chr1	12297856;12298793;12301553;12304380;12305747;12307193;12308028;12310036	12298022;12298917;12301738;12304518;12305946;12307412;12308297;12310147	-;-;-;-;-;-;-;-	1419	25	28	5	41	12	39
CSbapl.717	BAPLcs_chr1;BAPLcs_chr1;BAPLcs_chr1;BAPLcs_chr1;BAPLcs_chr1;BAPLcs_chr1;BAPLcs_chr1;BAPLcs_chr1;BAPLcs_chr1;BAPLcs_chr1	12320045;12321687;12323616;12328331;12329965;12332250;12334887;12335876;12336876;12339230	12320211;12321811;12323801;12328469;12330164;12332469;12335156;12336008;12337108;12339485	-;-;-;-;-;-;-;-;-;-	1929	31	25	9	25	9	16
CSbapl.720	BAPLcs_chr1;BAPLcs_chr1;BAPLcs_chr1;BAPLcs_chr1;BAPLcs_chr1;BAPLcs_chr1;BAPLcs_chr1;BAPLcs_chr1;BAPLcs_chr1;BAPLcs_chr1	12354418;12355818;12356675;12358337;12359247;12361270;12362280;12363317;12364204;12365186	12354580;12355940;12356860;12358475;12359446;12361489;12362549;12363449;12364436;12365468	-;-;-;-;-;-;-;-;-;-	1950	9	4	0	12	2	4
CSbapl.722	BAPLcs_chr1;BAPLcs_chr1;BAPLcs_chr1;BAPLcs_chr1;BAPLcs_chr1;BAPLcs_chr1;BAPLcs_chr1	12375268;12391325;12392491;12410102;12412150;12412968;12413688	12375613;12391448;12392636;12410324;12412349;12413044;12413972	+;+;+;+;+;+;+	1401	43	26	0	18	17	17
CSbapl.725	BAPLcs_chr1;BAPLcs_chr1;BAPLcs_chr1;BAPLcs_chr1;BAPLcs_chr1;BAPLcs_chr1;BAPLcs_chr1;BAPLcs_chr1;BAPLcs_chr1;BAPLcs_chr1;BAPLcs_chr1;BAPLcs_chr1;BAPLcs_chr1;BAPLcs_chr1;BAPLcs_chr1;BAPLcs_chr1;BAPLcs_chr1;BAPLcs_chr1	12471380;12472334;12476043;12478272;12479640;12481131;12481966;12485136;12485805;12499018;12501363;12503988;12505618;12509970;12512592;12513579;12514974;12517275	12471546;12472458;12476228;12478410;12479839;12481350;12482235;12485268;12486037;12499142;12501548;12504126;12505817;12510189;12512861;12513711;12515206;12517530	-;-;-;-;-;-;-;-;-;-;-;-;-;-;-;-;-;-	3435	22	28	20	127	34	53
CSbapl.726	BAPLcs_chr1;BAPLcs_chr1;BAPLcs_chr1;BAPLcs_chr1;BAPLcs_chr1;BAPLcs_chr1;BAPLcs_chr1;BAPLcs_chr1;BAPLcs_chr1;BAPLcs_chr1	12538279;12539642;12540495;12541921;12542831;12544857;12545865;12546919;12547541;12548541	12538445;12539760;12540680;12542059;12543030;12545076;12546134;12547051;12547773;12548787	-;-;-;-;-;-;-;-;-;-	1914	2	1	0	8	2	1
CSbapl.724	BAPLcs_chr1;BAPLcs_chr1;BAPLcs_chr1;BAPLcs_chr1;BAPLcs_chr1	12562145;12575748;12588093;12590123;12592480	12562431;12575893;12588315;12590322;12592745	+;+;+;+;+	1122	17	13	5	16	8	23
CSbapl.728	BAPLcs_chr1	12602379	12606254	-	3876	0	4	0	1	0	7
CSbapl.730	BAPLcs_chr1;BAPLcs_chr1;BAPLcs_chr1;BAPLcs_chr1;BAPLcs_chr1;BAPLcs_chr1;BAPLcs_chr1;BAPLcs_chr1;BAPLcs_chr1;BAPLcs_chr1;BAPLcs_chr1;BAPLcs_chr1;BAPLcs_chr1;BAPLcs_chr1;BAPLcs_chr1;BAPLcs_chr1;BAPLcs_chr1;BAPLcs_chr1;BAPLcs_chr1	12784000;12791577;12791577;12794165;12794165;12794999;12794999;12796118;12796118;12801154;12801154;12803336;12803336;12806526;12807389;12813487;12814546;12815555;12821709	12784008;12791652;12791652;12794332;12794332;12795100;12795100;12796176;12796176;12801320;12801320;12803564;12803548;12806658;12807541;12813607;12814608;12815568;12822086	+;+;+;+;+;+;+;+;+;+;+;+;+;+;+;+;+;+;+	1672	234	289	72	342	410	410
CSbapl.731	BAPLcs_chr1;BAPLcs_chr1;BAPLcs_chr1;BAPLcs_chr1;BAPLcs_chr1;BAPLcs_chr1;BAPLcs_chr1;BAPLcs_chr1	12648363;12649317;12652799;12657725;12658560;12661734;12662404;12665157	12648529;12649441;12652984;12657944;12658829;12661866;12662636;12665412	-;-;-;-;-;-;-;-	1590	7	19	1	114	26	30
CSbapl.734	BAPLcs_chr1;BAPLcs_chr1;BAPLcs_chr1;BAPLcs_chr1;BAPLcs_chr1;BAPLcs_chr1;BAPLcs_chr1;BAPLcs_chr1;BAPLcs_chr1;BAPLcs_chr1	12672197;12676840;12678292;12683133;12684755;12689468;12692093;12693080;12694474;12696777	12672363;12676964;12678477;12683271;12684954;12689687;12692362;12693212;12694706;12697032	-;-;-;-;-;-;-;-;-;-	1929	17	26	8	45	26	38
CSbapl.736	BAPLcs_chr1;BAPLcs_chr1;BAPLcs_chr1;BAPLcs_chr1;BAPLcs_chr1;BAPLcs_chr1;BAPLcs_chr1;BAPLcs_chr1;BAPLcs_chr1;BAPLcs_chr1	12719741;12721104;12721957;12723382;12724292;12726317;12727324;12728378;12729001;12730001	12719907;12721222;12722142;12723520;12724491;12726536;12727593;12728510;12729233;12730247	-;-;-;-;-;-;-;-;-;-	1914	7	1	0	7	7	5
CSbapl.740	BAPLcs_chr1;BAPLcs_chr1;BAPLcs_chr1;BAPLcs_chr1;BAPLcs_chr1;BAPLcs_chr1;BAPLcs_chr1;BAPLcs_chr1;BAPLcs_chr1;BAPLcs_chr1;BAPLcs_chr1;BAPLcs_chr1	12826436;12827931;12828641;12834297;12835167;12845922;12847126;12848191;12849217;12849612;12851416;12857622	12827083;12827957;12828807;12834435;12835215;12846117;12847300;12848346;12849372;12849685;12851538;12857880	-;-;-;-;-;-;-;-;-;-;-;-	2169	53	73	21	64	60	93
CSbapl.741	BAPLcs_chr1;BAPLcs_chr1;BAPLcs_chr1;BAPLcs_chr1;BAPLcs_chr1	12840079;12840079;12840387;12840539;12841355	12840233;12840264;12841278;12841279;12841645	+;+;+;+;+	1370	94	79	68	2	6	5
CSbapl.743	BAPLcs_chr1;BAPLcs_chr1;BAPLcs_chr1;BAPLcs_chr1	12866749;12867503;12868699;12870582	12867421;12868482;12869509;12871186	+;+;+;+	3069	0	3	1	3	2	2
CSbapl.746	BAPLcs_chr1;BAPLcs_chr1	12885992;12885992	12886423;12886423	+;+	432	346	110	34	23	58	63
CSbapl.749	BAPLcs_chr1;BAPLcs_chr1	12895655;12895655	12897322;12897322	+;+	1668	183	158	168	803	628	642
CSbapl.758	BAPLcs_chr1	12945138	12946199	-	1062	22	63	21	15	13	27
CSbapl.781	BAPLcs_chr1;BAPLcs_chr1;BAPLcs_chr1;BAPLcs_chr1;BAPLcs_chr1;BAPLcs_chr1;BAPLcs_chr1;BAPLcs_chr1;BAPLcs_chr1;BAPLcs_chr1;BAPLcs_chr1;BAPLcs_chr1;BAPLcs_chr1;BAPLcs_chr1;BAPLcs_chr1;BAPLcs_chr1;BAPLcs_chr1;BAPLcs_chr1;BAPLcs_chr1;BAPLcs_chr1;BAPLcs_chr1;BAPLcs_chr1;BAPLcs_chr1;BAPLcs_chr1;BAPLcs_chr1;BAPLcs_chr1;BAPLcs_chr1	13024711;13024711;13024872;13025771;13025771;13029367;13029367;13033092;13033092;13034068;13034068;13035825;13035825;13036658;13036658;13036960;13036960;13037802;13037802;13038452;13038452;13039997;13039997;13040645;13040645;13043587;13043587	13025130;13024835;13025130;13025887;13025887;13029469;13029469;13033211;13033211;13034211;13034211;13035860;13035860;13036738;13036738;13037025;13037025;13037844;13037844;13038536;13038536;13040080;13040080;13040685;13040685;13043647;13043647	-;-;-;-;-;-;-;-;-;-;-;-;-;-;-;-;-;-;-;-;-;-;-;-;-;-;-	1401	417	412	242	498	401	496
CSbapl.782	BAPLcs_chr1	13042041	13043210	+	1170	11	12	10	10	6	7
CSbapl.783	BAPLcs_chr1;BAPLcs_chr1;BAPLcs_chr1;BAPLcs_chr1;BAPLcs_chr1;BAPLcs_chr1;BAPLcs_chr1;BAPLcs_chr1;BAPLcs_chr1;BAPLcs_chr1;BAPLcs_chr1;BAPLcs_chr1;BAPLcs_chr1;BAPLcs_chr1;BAPLcs_chr1;BAPLcs_chr1;BAPLcs_chr1;BAPLcs_chr1;BAPLcs_chr1;BAPLcs_chr1;BAPLcs_chr1;BAPLcs_chr1;BAPLcs_chr1;BAPLcs_chr1;BAPLcs_chr1;BAPLcs_chr1;BAPLcs_chr1;BAPLcs_chr1;BAPLcs_chr1;BAPLcs_chr1;BAPLcs_chr1;BAPLcs_chr1;BAPLcs_chr1;BAP…	13043808;13043808;13043808;13045755;13045755;13045755;13048404;13048404;13048404;13049174;13049174;13049174;13049863;13049863;13049863;13050356;13050356;13050356;13051207;13051207;13051207;13052937;13052937;13052937;13054669;13054669;13054669;13056397;13056397;13056397;13057181;13057181;13057181;13058569;13058569;13058569;13059030;13059030;13059030;13059781;13059781;13059781;13060396;13060396;130…	13043855;13043855;13043855;13045812;13045812;13045812;13048500;13048500;13048500;13049282;13049282;13049282;13049989;13049989;13049989;13050417;13050417;13050417;13051278;13051308;13051278;13053011;13053011;13053011;13054807;13054807;13054807;13056564;13056564;13056564;13057257;13057257;13057257;13058662;13058662;13058662;13059142;13059142;13059142;13059965;13059965;13059965;13060558;13060558;130…	+;+;+;+;+;+;+;+;+;+;+;+;+;+;+;+;+;+;+;+;+;+;+;+;+;+;+;+;+;+;+;+;+;+;+;+;+;+;+;+;+;+;+;+;+;+;+;+;+;+;+;+;+;+;+;+;+;+;+;+;+;+;+;+;+;+;+;+;+;+;+;+;+;+;+;+;+;+;+;+;+;+;+;+;+;+;+;+;+;+;+;+;+;+;+;+;+;+;+;+;+;+;+;+;+;+;+;+;+;+;+;+;+;+;+;+;+;+;+;+;+;+;+;+;+;+;+;+;+;+;+;+;+;+;+;+	5745	479	860	225	733	923	1248
CSbapl.785	BAPLcs_chr1;BAPLcs_chr1;BAPLcs_chr1;BAPLcs_chr1;BAPLcs_chr1;BAPLcs_chr1;BAPLcs_chr1;BAPLcs_chr1;BAPLcs_chr1;BAPLcs_chr1;BAPLcs_chr1;BAPLcs_chr1;BAPLcs_chr1;BAPLcs_chr1;BAPLcs_chr1;BAPLcs_chr1;BAPLcs_chr1;BAPLcs_chr1;BAPLcs_chr1;BAPLcs_chr1;BAPLcs_chr1;BAPLcs_chr1;BAPLcs_chr1;BAPLcs_chr1;BAPLcs_chr1;BAPLcs_chr1;BAPLcs_chr1;BAPLcs_chr1;BAPLcs_chr1;BAPLcs_chr1;BAPLcs_chr1;BAPLcs_chr1;BAPLcs_chr1;BAP…	13131118;13131118;13131118;13131840;13131840;13131840;13136052;13136052;13136052;13140184;13149436;13149436;13149436;13150783;13150783;13150783;13152157;13152157;13152157;13152730;13152730;13152730;13154183;13154183;13154183;13155235;13155235;13155235;13156856;13156856;13156856;13157470;13157470;13157470;13158038;13158038;13158038;13158803;13158803;13158803	13131204;13131204;13131204;13131946;13131946;13131946;13136108;13136108;13136108;13140204;13149584;13149584;13149584;13150867;13150867;13150867;13152218;13152218;13152218;13152809;13152809;13152809;13154268;13154268;13154268;13155270;13155270;13155270;13156931;13156931;13156931;13157613;13157613;13157613;13158114;13158114;13158114;13159175;13159175;13159175	-;-;-;-;-;-;-;-;-;-;-;-;-;-;-;-;-;-;-;-;-;-;-;-;-;-;-;-;-;-;-;-;-;-;-;-;-;-;-;-	1440	283	359	158	258	341	331
CSbapl.787	BAPLcs_chr1;BAPLcs_chr1;BAPLcs_chr1;BAPLcs_chr1;BAPLcs_chr1;BAPLcs_chr1;BAPLcs_chr1;BAPLcs_chr1;BAPLcs_chr1;BAPLcs_chr1;BAPLcs_chr1;BAPLcs_chr1;BAPLcs_chr1;BAPLcs_chr1;BAPLcs_chr1;BAPLcs_chr1;BAPLcs_chr1;BAPLcs_chr1;BAPLcs_chr1;BAPLcs_chr1;BAPLcs_chr1;BAPLcs_chr1;BAPLcs_chr1;BAPLcs_chr1;BAPLcs_chr1;BAPLcs_chr1;BAPLcs_chr1;BAPLcs_chr1;BAPLcs_chr1;BAPLcs_chr1;BAPLcs_chr1;BAPLcs_chr1;BAPLcs_chr1;BAP…	13212923;13212923;13212923;13213770;13213774;13213774;13213774;13216314;13216314;13216314;13216314;13217716;13217716;13217716;13217716;13220139;13220139;13220139;13220139;13222355;13222355;13222355;13222355;13224302;13224302;13224302;13224302;13225515;13225515;13225515;13225515;13225990;13225990;13225990;13225990;13227044;13227044;13227044;13227044;13229023;13229023;13229023;13229608;13229608;132…	13213034;13213034;13213034;13213976;13213976;13213976;13213976;13216399;13216399;13216399;13216399;13217821;13217821;13217821;13217821;13220287;13220287;13220287;13220287;13222385;13222385;13222385;13222385;13224448;13224448;13224448;13224448;13225600;13225600;13225600;13225600;13226040;13226040;13226040;13226040;13227141;13227141;13227141;13227122;13229183;13229183;13229183;13229689;13229718;132…	-;-;-;-;-;-;-;-;-;-;-;-;-;-;-;-;-;-;-;-;-;-;-;-;-;-;-;-;-;-;-;-;-;-;-;-;-;-;-;-;-;-;-;-;-;-;-	1416	91	159	52	234	159	132
CSbapl.789	BAPLcs_chr1;BAPLcs_chr1;BAPLcs_chr1;BAPLcs_chr1;BAPLcs_chr1;BAPLcs_chr1;BAPLcs_chr1;BAPLcs_chr1;BAPLcs_chr1;BAPLcs_chr1;BAPLcs_chr1;BAPLcs_chr1;BAPLcs_chr1;BAPLcs_chr1;BAPLcs_chr1;BAPLcs_chr1;BAPLcs_chr1;BAPLcs_chr1;BAPLcs_chr1;BAPLcs_chr1;BAPLcs_chr1;BAPLcs_chr1;BAPLcs_chr1;BAPLcs_chr1;BAPLcs_chr1;BAPLcs_chr1;BAPLcs_chr1;BAPLcs_chr1;BAPLcs_chr1;BAPLcs_chr1;BAPLcs_chr1;BAPLcs_chr1;BAPLcs_chr1;BAP…	13232592;13232607;13246478;13246478;13248501;13248501;13249309;13249309;13250452;13250452;13253240;13253240;13255056;13255056;13255861;13255861;13256481;13256481;13256992;13256992;13257043;13257870;13257870;13257870;13258863;13258863;13258863;13265362;13265362;13265362;13266462;13266462;13266462;13267060;13267060;13267060;13268151;13268151	13232789;13232789;13246618;13246618;13248622;13248622;13249426;13249426;13250579;13250579;13253345;13253345;13255120;13255120;13256023;13256023;13256567;13256567;13257108;13257108;13257108;13258004;13258004;13258004;13258981;13258981;13258981;13265425;13265425;13265425;13266645;13266645;13266645;13267118;13267118;13267154;13268267;13268267	+;+;+;+;+;+;+;+;+;+;+;+;+;+;+;+;+;+;+;+;+;+;+;+;+;+;+;+;+;+;+;+;+;+;+;+;+;+	1959	291	666	238	614	583	598
CSbapl.791	BAPLcs_chr1;BAPLcs_chr1;BAPLcs_chr1;BAPLcs_chr1;BAPLcs_chr1;BAPLcs_chr1;BAPLcs_chr1;BAPLcs_chr1;BAPLcs_chr1;BAPLcs_chr1;BAPLcs_chr1	13279860;13290257;13291258;13292964;13296665;13297665;13299236;13304710;13305704;13307738;13308594	13280133;13290666;13291887;13293191;13296790;13297802;13299368;13304837;13305781;13307908;13309022	+;+;+;+;+;+;+;+;+;+;+	2745	6	2	4	0	5	2
CSbapl.796	BAPLcs_chr1;BAPLcs_chr1;BAPLcs_chr1;BAPLcs_chr1;BAPLcs_chr1;BAPLcs_chr1;BAPLcs_chr1;BAPLcs_chr1;BAPLcs_chr1;BAPLcs_chr1;BAPLcs_chr1;BAPLcs_chr1;BAPLcs_chr1;BAPLcs_chr1;BAPLcs_chr1;BAPLcs_chr1;BAPLcs_chr1;BAPLcs_chr1;BAPLcs_chr1;BAPLcs_chr1;BAPLcs_chr1;BAPLcs_chr1;BAPLcs_chr1;BAPLcs_chr1;BAPLcs_chr1;BAPLcs_chr1;BAPLcs_chr1;BAPLcs_chr1;BAPLcs_chr1;BAPLcs_chr1;BAPLcs_chr1;BAPLcs_chr1;BAPLcs_chr1;BAP…	13330596;13330776;13332019;13332019;13345115;13345115;13345161;13345575;13352043;13352043;13352511;13352511;13354924;13354924;13355789;13355789;13358987;13358987;13359762;13359762;13361183;13361183;13361690;13361690;13363123;13363123;13363699;13363699;13366972;13366972;13375594;13375594;13376372;13376372;13376480;13377199;13377199;13377199;13378828;13378828;13378828;13379631;13379631;13379631;133…	13330901;13330901;13332230;13332230;13345223;13345223;13345223;13345802;13352192;13352192;13352682;13352682;13355081;13355081;13356038;13356038;13359136;13359136;13360012;13360012;13361294;13361294;13361842;13361842;13363222;13363222;13363808;13363808;13367135;13367135;13375668;13375668;13376578;13376578;13376578;13377267;13377267;13377267;13378949;13378949;13378949;13379790;13379790;13379790;133…	+;+;+;+;+;+;+;+;+;+;+;+;+;+;+;+;+;+;+;+;+;+;+;+;+;+;+;+;+;+;+;+;+;+;+;+;+;+;+;+;+;+;+;+;+;+;+;+;+;+;+;+;+;+;+;+;+;+;+;+;+;+;+;+;+;+;+;+;+;+;+;+;+;+;+;+;+;+;+;+;+;+;+;+;+;+;+;+;+;+;+;+;+;+;+;+;+;+	6540	307	561	167	497	516	500
CSbapl.801	BAPLcs_chr1;BAPLcs_chr1;BAPLcs_chr1;BAPLcs_chr1;BAPLcs_chr1	13446085;13446722;13447563;13448530;13451322	13446271;13446908;13447904;13448726;13451527	-;-;-;-;-	1119	92	85	72	93	79	83
CSbapl.802	BAPLcs_chr1;BAPLcs_chr1;BAPLcs_chr1;BAPLcs_chr1;BAPLcs_chr1	13454341;13455318;13456173;13457636;13458488	13454533;13455457;13456287;13457705;13458998	+;+;+;+;+	1029	109	131	117	77	108	122
CSbapl.804	BAPLcs_chr1;BAPLcs_chr1;BAPLcs_chr1;BAPLcs_chr1;BAPLcs_chr1;BAPLcs_chr1;BAPLcs_chr1;BAPLcs_chr1;BAPLcs_chr1;BAPLcs_chr1;BAPLcs_chr1;BAPLcs_chr1;BAPLcs_chr1;BAPLcs_chr1;BAPLcs_chr1;BAPLcs_chr1;BAPLcs_chr1;BAPLcs_chr1;BAPLcs_chr1;BAPLcs_chr1;BAPLcs_chr1;BAPLcs_chr1;BAPLcs_chr1;BAPLcs_chr1;BAPLcs_chr1;BAPLcs_chr1;BAPLcs_chr1;BAPLcs_chr1;BAPLcs_chr1;BAPLcs_chr1;BAPLcs_chr1;BAPLcs_chr1;BAPLcs_chr1;BAP…	13483445;13483445;13483445;13483445;13483445;13484616;13484616;13484616;13484616;13484616;13485129;13485129;13485129;13485129;13485129;13485705;13485705;13485705;13485705;13485705;13489693;13494388;13494388;13494388;13494948;13494948;13494948;13494948;13494948;13495876;13495876;13495876;13495876;13495876;13496432;13496432;13496432;13496432;13496432;13497538;13497538;13497538;13497538;13497538;134…	13483557;13483557;13483557;13483557;13483557;13484720;13484720;13484720;13484720;13484720;13485373;13485373;13485373;13485373;13485373;13485849;13485849;13485849;13485849;13485849;13489716;13494405;13494405;13494405;13494987;13494987;13494987;13494987;13494987;13495918;13495918;13495918;13495918;13495918;13496534;13496534;13496534;13496534;13496534;13497648;13497648;13497648;13497648;13497648;134…	-;-;-;-;-;-;-;-;-;-;-;-;-;-;-;-;-;-;-;-;-;-;-;-;-;-;-;-;-;-;-;-;-;-;-;-;-;-;-;-;-;-;-;-;-;-;-;-;-;-;-;-;-;-;-;-;-;-;-;-;-;-;-;-;-;-;-;-;-;-;-;-;-;-;-;-;-;-;-;-;-;-;-;-;-;-;-;-;-;-;-;-;-;-;-;-;-;-;-;-;-;-;-;-;-;-;-;-;-;-;-	2586	29	35	19	357	85	101
CSbapl.805	BAPLcs_chr1	13476780	13477160	+	381	27	61	26	108	55	88
CSbapl.806	BAPLcs_chr1;BAPLcs_chr1;BAPLcs_chr1;BAPLcs_chr1;BAPLcs_chr1;BAPLcs_chr1;BAPLcs_chr1;BAPLcs_chr1;BAPLcs_chr1;BAPLcs_chr1;BAPLcs_chr1;BAPLcs_chr1;BAPLcs_chr1;BAPLcs_chr1;BAPLcs_chr1;BAPLcs_chr1;BAPLcs_chr1;BAPLcs_chr1;BAPLcs_chr1;BAPLcs_chr1;BAPLcs_chr1;BAPLcs_chr1;BAPLcs_chr1;BAPLcs_chr1;BAPLcs_chr1;BAPLcs_chr1;BAPLcs_chr1;BAPLcs_chr1;BAPLcs_chr1;BAPLcs_chr1;BAPLcs_chr1;BAPLcs_chr1;BAPLcs_chr1;BAP…	13533468;13534001;13534765;13537826;13538673;13542120;13542172;13543070;13543070;13543741;13543741;13544863;13544863;13547642;13547642;13549311;13549311;13549970;13549970;13552582;13552582;13554212;13554212;13554887;13554887;13556756;13558037;13558065;13558654;13558654;13559964;13559964;13561937;13561937;13562908;13562908;13563554;13563554;13565160;13565160;13565959;13565959;13567124;13567124;135…	13533501;13534047;13534810;13537872;13538736;13542233;13542233;13543115;13543115;13543784;13543784;13544935;13544935;13547736;13547736;13549401;13549401;13550087;13550087;13553403;13553403;13554324;13554324;13555212;13555134;13556909;13558169;13558169;13558763;13558763;13560088;13560088;13562070;13562070;13563031;13563031;13563674;13563674;13565260;13565260;13566002;13566002;13567253;13567253;135…	+;+;+;+;+;+;+;+;+;+;+;+;+;+;+;+;+;+;+;+;+;+;+;+;+;+;+;+;+;+;+;+;+;+;+;+;+;+;+;+;+;+;+;+;+;+;+;+;+;+;+;+;+;+;+;+	3929	596	756	675	1005	1290	1399
CSbapl.815	BAPLcs_chr1	13636364	13637182	+	819	0	0	0	1	0	0
CSbapl.816	BAPLcs_chr1	13639141	13639647	+	507	6	0	1	0	0	0
CSbapl.817	BAPLcs_chr1	13648726	13650069	-	1344	10	58	2	2	12	0
CSbapl.819	BAPLcs_chr1	13667034	13667627	+	594	0	0	0	3	1	7
CSbapl.823	BAPLcs_chr1;BAPLcs_chr1	13684901;13700413	13686547;13702533	-;-	3768	0	0	0	0	0	1
CSbapl.827	BAPLcs_chr1	13728503	13730623	-	2121	0	0	0	2	3	0
CSbapl.831	BAPLcs_chr1;BAPLcs_chr1;BAPLcs_chr1;BAPLcs_chr1;BAPLcs_chr1;BAPLcs_chr1;BAPLcs_chr1;BAPLcs_chr1;BAPLcs_chr1;BAPLcs_chr1;BAPLcs_chr1;BAPLcs_chr1;BAPLcs_chr1;BAPLcs_chr1;BAPLcs_chr1;BAPLcs_chr1;BAPLcs_chr1;BAPLcs_chr1;BAPLcs_chr1;BAPLcs_chr1;BAPLcs_chr1;BAPLcs_chr1;BAPLcs_chr1;BAPLcs_chr1;BAPLcs_chr1;BAPLcs_chr1;BAPLcs_chr1;BAPLcs_chr1	13783298;13783298;13783861;13783861;13790450;13790450;13791770;13791770;13792764;13792764;13794814;13794814;13796507;13796507;13798182;13798182;13803492;13803492;13804152;13804152;13805570;13805570;13807153;13807153;13808219;13808219;13809253;13809253	13783399;13783399;13784013;13784013;13790542;13790542;13791921;13791921;13792860;13792860;13794924;13794924;13796613;13796613;13798263;13798263;13803563;13803563;13804300;13804300;13805627;13805627;13807269;13807269;13808482;13808482;13809309;13809309	-;-;-;-;-;-;-;-;-;-;-;-;-;-;-;-;-;-;-;-;-;-;-;-;-;-;-;-	1614	194	238	234	345	319	300
CSbapl.832	BAPLcs_chr1;BAPLcs_chr1;BAPLcs_chr1;BAPLcs_chr1;BAPLcs_chr1;BAPLcs_chr1;BAPLcs_chr1;BAPLcs_chr1;BAPLcs_chr1;BAPLcs_chr1;BAPLcs_chr1	13811259;13812422;13813246;13814194;13815671;13818308;13819494;13820154;13822819;13824835;13827670	13811395;13812498;13813343;13814385;13815745;13818408;13819593;13820224;13822901;13824988;13827736	+;+;+;+;+;+;+;+;+;+;+	1155	91	138	91	215	164	271
CSbapl.834	BAPLcs_chr1;BAPLcs_chr1;BAPLcs_chr1;BAPLcs_chr1;BAPLcs_chr1;BAPLcs_chr1;BAPLcs_chr1;BAPLcs_chr1;BAPLcs_chr1;BAPLcs_chr1;BAPLcs_chr1;BAPLcs_chr1;BAPLcs_chr1;BAPLcs_chr1;BAPLcs_chr1;BAPLcs_chr1;BAPLcs_chr1;BAPLcs_chr1;BAPLcs_chr1;BAPLcs_chr1;BAPLcs_chr1;BAPLcs_chr1;BAPLcs_chr1;BAPLcs_chr1;BAPLcs_chr1;BAPLcs_chr1;BAPLcs_chr1;BAPLcs_chr1;BAPLcs_chr1;BAPLcs_chr1;BAPLcs_chr1;BAPLcs_chr1;BAPLcs_chr1;BAP…	13831949;13831949;13832600;13832600;13833309;13833309;13834531;13834531;13835679;13835679;13838167;13838167;13839476;13839476;13840706;13840706;13841969;13841969;13890259;13909687;13909687;13909687;13910684;13910684;13910684;13926532;13926547;13926547;13926547;13938227;13938227;13938227;13938227;13948352	13832070;13832070;13832665;13832665;13833442;13833442;13834631;13834631;13835781;13835781;13838225;13838225;13839562;13839562;13840900;13840900;13842049;13842049;13891791;13909728;13909728;13909728;13910725;13910725;13910725;13926633;13926633;13926633;13926633;13938557;13938505;13938505;13938505;13948353	-;-;-;-;-;-;-;-;-;-;-;-;-;-;-;-;-;-;-;-;-;-;-;-;-;-;-;-;-;-;-;-;-;-	3000	131	249	113	382	348	373
CSbapl.836	BAPLcs_chr1;BAPLcs_chr1;BAPLcs_chr1;BAPLcs_chr1;BAPLcs_chr1;BAPLcs_chr1;BAPLcs_chr1;BAPLcs_chr1;BAPLcs_chr1;BAPLcs_chr1;BAPLcs_chr1;BAPLcs_chr1;BAPLcs_chr1;BAPLcs_chr1;BAPLcs_chr1;BAPLcs_chr1;BAPLcs_chr1;BAPLcs_chr1;BAPLcs_chr1;BAPLcs_chr1;BAPLcs_chr1;BAPLcs_chr1;BAPLcs_chr1;BAPLcs_chr1;BAPLcs_chr1;BAPLcs_chr1;BAPLcs_chr1;BAPLcs_chr1;BAPLcs_chr1;BAPLcs_chr1;BAPLcs_chr1;BAPLcs_chr1;BAPLcs_chr1;BAP…	13848805;13853274;13853275;13853275;13853275;13853849;13853849;13853849;13853849;13854851;13854851;13854851;13854851;13861574;13861574;13861574;13861574;13866919;13866919;13866919;13866919;13868135;13868135;13868135;13868135;13869393;13869393;13869393;13869393;13869959;13869959;13869959;13869959;13876198;13876198;13876198;13876198;13878061;13878061;13878061;13878061;13878955;13878955;13878955;138…	13848824;13853375;13853375;13853375;13853375;13854091;13854091;13854091;13854091;13855018;13855018;13855018;13855018;13861628;13861628;13861628;13861628;13867030;13867030;13867030;13867030;13868231;13868231;13868231;13868231;13869494;13869494;13869494;13869494;13870037;13870037;13870037;13870037;13876371;13876371;13876371;13876371;13878122;13878122;13878122;13878122;13879032;13879032;13879032;138…	+;+;+;+;+;+;+;+;+;+;+;+;+;+;+;+;+;+;+;+;+;+;+;+;+;+;+;+;+;+;+;+;+;+;+;+;+;+;+;+;+;+;+;+;+;+;+;+;+;+;+;+;+;+;+;+;+;+;+;+;+;+;+;+;+;+;+;+;+;+;+;+;+;+;+;+;+;+;+;+;+;+;+;+;+	2814	367	476	301	650	828	670
CSbapl.837	BAPLcs_chr1;BAPLcs_chr1;BAPLcs_chr1;BAPLcs_chr1;BAPLcs_chr1;BAPLcs_chr1;BAPLcs_chr1;BAPLcs_chr1;BAPLcs_chr1;BAPLcs_chr1;BAPLcs_chr1;BAPLcs_chr1;BAPLcs_chr1;BAPLcs_chr1;BAPLcs_chr1;BAPLcs_chr1;BAPLcs_chr1;BAPLcs_chr1;BAPLcs_chr1;BAPLcs_chr1;BAPLcs_chr1;BAPLcs_chr1;BAPLcs_chr1;BAPLcs_chr1;BAPLcs_chr1;BAPLcs_chr1;BAPLcs_chr1;BAPLcs_chr1;BAPLcs_chr1;BAPLcs_chr1;BAPLcs_chr1	13941883;13941883;13941883;13941883;13947327;13947327;13947327;13947327;13948880;13948880;13948880;13948880;13953278;13953278;13953278;13953278;13955226;13957873;13957873;13959368;13959368;13959368;13959368;13962055;13962055;13962055;13962055;13962537;13962537;13962537;13962537	13942323;13942323;13942323;13942323;13947564;13947564;13947564;13947564;13948999;13948999;13948999;13948999;13953427;13953427;13953427;13953427;13956431;13957926;13957926;13959427;13959427;13959427;13959427;13962144;13962144;13962144;13962144;13962901;13962901;13962901;13962901	+;+;+;+;+;+;+;+;+;+;+;+;+;+;+;+;+;+;+;+;+;+;+;+;+;+;+;+;+;+;+	2724	191	321	109	314	381	348
CSbapl.840	BAPLcs_chr1;BAPLcs_chr1;BAPLcs_chr1;BAPLcs_chr1;BAPLcs_chr1;BAPLcs_chr1;BAPLcs_chr1;BAPLcs_chr1;BAPLcs_chr1;BAPLcs_chr1;BAPLcs_chr1;BAPLcs_chr1;BAPLcs_chr1;BAPLcs_chr1;BAPLcs_chr1;BAPLcs_chr1;BAPLcs_chr1;BAPLcs_chr1;BAPLcs_chr1;BAPLcs_chr1;BAPLcs_chr1;BAPLcs_chr1;BAPLcs_chr1;BAPLcs_chr1;BAPLcs_chr1;BAPLcs_chr1;BAPLcs_chr1;BAPLcs_chr1;BAPLcs_chr1;BAPLcs_chr1;BAPLcs_chr1;BAPLcs_chr1;BAPLcs_chr1;BAP…	14120623;14122234;14122885;14124036;14126592;14137435;14137435;14137435;14142819;14142819;14142819;14143988;14143988;14143988;14146538;14146538;14146538;14147447;14147447;14147447;14148466;14148466;14148466;14153558;14153558;14153558;14154734;14154734;14154734;14155190;14155190;14155190;14158175;14158175;14158175;14159052;14159052;14159052;14160897;14160897;14160897	14120802;14122446;14122989;14124172;14126733;14137541;14137541;14137541;14143134;14143134;14143134;14144145;14144145;14144145;14146593;14146593;14146593;14147567;14147567;14147567;14148598;14148598;14148598;14153662;14153662;14153662;14154930;14154930;14154930;14155259;14155259;14155259;14158221;14158221;14158221;14159192;14159213;14159192;14160933;14160933;14160930	-;-;-;-;-;-;-;-;-;-;-;-;-;-;-;-;-;-;-;-;-;-;-;-;-;-;-;-;-;-;-;-;-;-;-;-;-;-;-;-;-	2286	422	513	441	1781	2011	1918
CSbapl.841	BAPLcs_chr1;BAPLcs_chr1;BAPLcs_chr1;BAPLcs_chr1;BAPLcs_chr1	13997471;13999407;13999983;14004470;14008138	13997650;13999619;14000087;14004606;14008192	-;-;-;-;-	690	5	7	4	42	37	35
CSbapl.844	BAPLcs_chr1;BAPLcs_chr1	14118117;14118581	14118165;14120598	+;+	2067	32	12	7	48	14	34
CSbapl.845	BAPLcs_chr1;BAPLcs_chr1;BAPLcs_chr1;BAPLcs_chr1;BAPLcs_chr1;BAPLcs_chr1;BAPLcs_chr1;BAPLcs_chr1;BAPLcs_chr1;BAPLcs_chr1;BAPLcs_chr1;BAPLcs_chr1;BAPLcs_chr1;BAPLcs_chr1;BAPLcs_chr1;BAPLcs_chr1;BAPLcs_chr1;BAPLcs_chr1;BAPLcs_chr1;BAPLcs_chr1;BAPLcs_chr1;BAPLcs_chr1;BAPLcs_chr1;BAPLcs_chr1;BAPLcs_chr1;BAPLcs_chr1;BAPLcs_chr1;BAPLcs_chr1;BAPLcs_chr1;BAPLcs_chr1;BAPLcs_chr1;BAPLcs_chr1;BAPLcs_chr1;BAP…	14166655;14166655;14166655;14168259;14168259;14168259;14169830;14169830;14169830;14174461;14174461;14174461;14175648;14175648;14175648;14177580;14177580;14177580;14178368;14178368;14178368;14179246;14179246;14179246;14184409;14184409;14184409;14186163;14186163;14186163;14188964;14188964;14188964;14190663;14190663;14190663;14192761;14192761;14192761	14166952;14166952;14166952;14168356;14168356;14168356;14169875;14169875;14169875;14174561;14174561;14174561;14175767;14175767;14175767;14177730;14177730;14177730;14178513;14178513;14178513;14179371;14179371;14179371;14184550;14184550;14184550;14186329;14186329;14186329;14190149;14190149;14190149;14190746;14190746;14190746;14192789;14192789;14192789	+;+;+;+;+;+;+;+;+;+;+;+;+;+;+;+;+;+;+;+;+;+;+;+;+;+;+;+;+;+;+;+;+;+;+;+;+;+;+	2694	240	420	116	504	327	477
CSbapl.846	BAPLcs_chr1;BAPLcs_chr1;BAPLcs_chr1;BAPLcs_chr1;BAPLcs_chr1;BAPLcs_chr1;BAPLcs_chr1;BAPLcs_chr1;BAPLcs_chr1	14209299;14210833;14211591;14214084;14216028;14216734;14217366;14222105;14224744	14209513;14210906;14212407;14214159;14216226;14216941;14217521;14222243;14224788	-;-;-;-;-;-;-;-;-	1929	98	89	83	182	162	161
CSbapl.848	BAPLcs_chr1;BAPLcs_chr1;BAPLcs_chr1;BAPLcs_chr1;BAPLcs_chr1;BAPLcs_chr1;BAPLcs_chr1;BAPLcs_chr1;BAPLcs_chr1;BAPLcs_chr1;BAPLcs_chr1;BAPLcs_chr1;BAPLcs_chr1;BAPLcs_chr1;BAPLcs_chr1;BAPLcs_chr1;BAPLcs_chr1;BAPLcs_chr1;BAPLcs_chr1;BAPLcs_chr1;BAPLcs_chr1;BAPLcs_chr1;BAPLcs_chr1;BAPLcs_chr1;BAPLcs_chr1	14225471;14225471;14227711;14227711;14228453;14228453;14229568;14229568;14230224;14230224;14231350;14231350;14231868;14231868;14232435;14232727;14232727;14233237;14233237;14234024;14234024;14235964;14235964;14236680;14236680	14225547;14225547;14227783;14227783;14228532;14228532;14229676;14229676;14230331;14230331;14231417;14231417;14231947;14231947;14232470;14232806;14232806;14233310;14233310;14234105;14234105;14236165;14236165;14236792;14236792	+;+;+;+;+;+;+;+;+;+;+;+;+;+;+;+;+;+;+;+;+;+;+;+;+	1182	63	183	53	265	434	354
CSbapl.850	BAPLcs_chr1	14244135	14245058	+	924	0	34	14	3712	4125	6538
CSbapl.851	BAPLcs_chr1;BAPLcs_chr1;BAPLcs_chr1;BAPLcs_chr1;BAPLcs_chr1;BAPLcs_chr1;BAPLcs_chr1;BAPLcs_chr1;BAPLcs_chr1;BAPLcs_chr1;BAPLcs_chr1;BAPLcs_chr1;BAPLcs_chr1;BAPLcs_chr1;BAPLcs_chr1;BAPLcs_chr1;BAPLcs_chr1;BAPLcs_chr1;BAPLcs_chr1;BAPLcs_chr1;BAPLcs_chr1;BAPLcs_chr1;BAPLcs_chr1;BAPLcs_chr1;BAPLcs_chr1;BAPLcs_chr1;BAPLcs_chr1;BAPLcs_chr1;BAPLcs_chr1;BAPLcs_chr1;BAPLcs_chr1;BAPLcs_chr1;BAPLcs_chr1;BAP…	14249712;14250979;14252321;14256469;14258947;14260201;14262556;14263999;14264063;14267562;14267562;14268716;14268716;14269607;14271212;14271212;14273216;14273216;14274554;14274554;14275874;14275874;14276837;14276837;14278748;14278748;14279812;14279812;14281037;14281037;14282440;14282440;14284260;14284260;14287085;14287085;14288596;14288596;14290942;14290942;14291825;14291825;14293441;14293441;142…	14249838;14251151;14252387;14256584;14259085;14260407;14262626;14264136;14264158;14267696;14267696;14268838;14268838;14269696;14271349;14271349;14273317;14273317;14274650;14274650;14275987;14275987;14276914;14276914;14278851;14278851;14279919;14279919;14281156;14281156;14282538;14282538;14284323;14284323;14287148;14287148;14288758;14288758;14291073;14291073;14291922;14291922;14293545;14293545;142…	-;-;-;-;-;-;-;-;-;-;-;-;-;-;-;-;-;-;-;-;-;-;-;-;-;-;-;-;-;-;-;-;-;-;-;-;-;-;-;-;-;-;-;-;-;-;-;-;-;-;-;-;-;-;-;-;-;-;-;-;-;-;-;-;-;-	4384	304	375	260	456	702	674
CSbapl.855	BAPLcs_chr1;BAPLcs_chr1;BAPLcs_chr1;BAPLcs_chr1;BAPLcs_chr1;BAPLcs_chr1;BAPLcs_chr1;BAPLcs_chr1;BAPLcs_chr1;BAPLcs_chr1;BAPLcs_chr1;BAPLcs_chr1;BAPLcs_chr1;BAPLcs_chr1;BAPLcs_chr1;BAPLcs_chr1;BAPLcs_chr1;BAPLcs_chr1;BAPLcs_chr1;BAPLcs_chr1;BAPLcs_chr1;BAPLcs_chr1;BAPLcs_chr1;BAPLcs_chr1;BAPLcs_chr1;BAPLcs_chr1;BAPLcs_chr1;BAPLcs_chr1;BAPLcs_chr1;BAPLcs_chr1	14346183;14346183;14349799;14349799;14352369;14352369;14352369;14354020;14354020;14354020;14354853;14354853;14354853;14355456;14355456;14355456;14356615;14356615;14356615;14357503;14357503;14357503;14358408;14364249;14364943;14364943;14364999;14365944;14367560;14367560	14346364;14346364;14349877;14349877;14352551;14352551;14352551;14354241;14354241;14354241;14354975;14354975;14354975;14355695;14355695;14355695;14356718;14356718;14356718;14357558;14357558;14357558;14358465;14364333;14365056;14365056;14365056;14366053;14367687;14367687	+;+;+;+;+;+;+;+;+;+;+;+;+;+;+;+;+;+;+;+;+;+;+;+;+;+;+;+;+;+	1684	27	41	20	84	135	106
CSbapl.857	BAPLcs_chr1	14380696	14382342	-	1647	6	22	14	7	2	5
CSbapl.860	BAPLcs_chr1	14403694	14405337	-	1644	42	33	34	20	10	31
CSbapl.861	BAPLcs_chr1	14409387	14412158	+	2772	3	0	3	2	0	2
CSbapl.862	BAPLcs_chr1;BAPLcs_chr1	14435461;14435461	14437104;14437110	-;-	1650	24	33	18	14	11	19
CSbapl.863	BAPLcs_chr1;BAPLcs_chr1;BAPLcs_chr1;BAPLcs_chr1;BAPLcs_chr1;BAPLcs_chr1;BAPLcs_chr1;BAPLcs_chr1;BAPLcs_chr1;BAPLcs_chr1;BAPLcs_chr1;BAPLcs_chr1;BAPLcs_chr1;BAPLcs_chr1;BAPLcs_chr1	14452443;14453444;14457382;14459372;14459414;14460439;14460439;14467791;14467791;14471460;14471460;14485295;14485295;14492216;14543815	14452543;14453656;14457571;14459523;14459523;14460718;14460718;14468014;14468014;14471621;14471621;14485459;14485459;14492228;14544355	-;-;-;-;-;-;-;-;-;-;-;-;-;-;-	2041	78	189	64	93	165	93
CSbapl.864	BAPLcs_chr1;BAPLcs_chr1	14492591;14498671	14492720;14499038	+;+	498	90	101	75	162	191	168
CSbapl.872	BAPLcs_chr1	14566885	14567802	+	918	1	3	13	2	2	0
CSbapl.875	BAPLcs_chr1	14596429	14596893	-	465	1	0	0	4	0	0
CSbapl.876	BAPLcs_chr1;BAPLcs_chr1;BAPLcs_chr1;BAPLcs_chr1;BAPLcs_chr1;BAPLcs_chr1;BAPLcs_chr1;BAPLcs_chr1;BAPLcs_chr1;BAPLcs_chr1;BAPLcs_chr1;BAPLcs_chr1;BAPLcs_chr1	14603894;14603894;14610215;14610215;14614005;14614038;14614038;14614688;14614688;14614688;14618152;14618152;14618152	14604120;14604120;14610380;14610380;14614219;14614219;14614219;14614938;14614938;14614938;14618252;14618252;14618252	-;-;-;-;-;-;-;-;-;-;-;-;-	960	33	87	48	505	538	517
CSbapl.878	BAPLcs_chr1;BAPLcs_chr1	14655466;14655466	14657838;14657838	+;+	2373	0	16	0	8	2	4
CSbapl.887	BAPLcs_chr1	14713135	14714337	-	1203	32	49	6	10	10	5
CSbapl.893	BAPLcs_chr1;BAPLcs_chr1	14759260;14763122	14760342;14763526	-;-	1488	23	69	8	25	169	14
CSbapl.902	BAPLcs_chr1;BAPLcs_chr1;BAPLcs_chr1;BAPLcs_chr1;BAPLcs_chr1;BAPLcs_chr1;BAPLcs_chr1;BAPLcs_chr1;BAPLcs_chr1;BAPLcs_chr1;BAPLcs_chr1;BAPLcs_chr1;BAPLcs_chr1;BAPLcs_chr1;BAPLcs_chr1;BAPLcs_chr1;BAPLcs_chr1;BAPLcs_chr1;BAPLcs_chr1;BAPLcs_chr1;BAPLcs_chr1;BAPLcs_chr1;BAPLcs_chr1;BAPLcs_chr1	14808350;14810249;14811194;14812411;14814035;14815324;14815865;14817576;14818451;14819714;14820939;14821944;14823339;14823745;14824519;14825380;14827584;14829333;14830332;14832162;14833562;14834197;14835591;14837248	14808469;14810349;14811305;14812494;14814148;14815410;14815943;14817628;14818549;14819767;14821112;14822066;14823434;14823858;14824588;14825489;14827699;14829457;14830371;14832264;14833702;14834323;14835771;14837341	-;-;-;-;-;-;-;-;-;-;-;-;-;-;-;-;-;-;-;-;-;-;-;-	2517	400	464	298	934	1047	1265
CSbapl.904	BAPLcs_chr1;BAPLcs_chr1	14840545;14850716	14840605;14851125	+;+	471	0	4	2	103	88	99
CSbapl.907	BAPLcs_chr1	14855468	14855914	-	447	2	8	4	34	31	42
CSbapl.910	BAPLcs_chr1;BAPLcs_chr1;BAPLcs_chr1;BAPLcs_chr1;BAPLcs_chr1;BAPLcs_chr1;BAPLcs_chr1;BAPLcs_chr1;BAPLcs_chr1;BAPLcs_chr1;BAPLcs_chr1;BAPLcs_chr1;BAPLcs_chr1;BAPLcs_chr1;BAPLcs_chr1;BAPLcs_chr1;BAPLcs_chr1;BAPLcs_chr1;BAPLcs_chr1;BAPLcs_chr1;BAPLcs_chr1;BAPLcs_chr1;BAPLcs_chr1;BAPLcs_chr1	14861259;14861259;14863367;14863367;14864173;14864173;14866755;14866755;14868687;14868687;14869896;14869896;14871496;14871496;14872684;14872684;14873195;14873195;14874304;14874304;14877097;14877097;14877973;14877973	14861974;14861974;14863503;14863503;14864339;14864339;14866916;14866916;14868848;14868848;14870012;14870012;14871641;14871641;14872782;14872782;14873295;14873295;14874604;14874604;14877325;14877325;14878008;14878008	-;-;-;-;-;-;-;-;-;-;-;-;-;-;-;-;-;-;-;-;-;-;-;-	2373	154	170	85	352	564	578
CSbapl.911	BAPLcs_chr1;BAPLcs_chr1;BAPLcs_chr1;BAPLcs_chr1;BAPLcs_chr1;BAPLcs_chr1;BAPLcs_chr1;BAPLcs_chr1;BAPLcs_chr1;BAPLcs_chr1;BAPLcs_chr1;BAPLcs_chr1;BAPLcs_chr1;BAPLcs_chr1;BAPLcs_chr1;BAPLcs_chr1;BAPLcs_chr1;BAPLcs_chr1;BAPLcs_chr1;BAPLcs_chr1;BAPLcs_chr1;BAPLcs_chr1;BAPLcs_chr1;BAPLcs_chr1;BAPLcs_chr1;BAPLcs_chr1;BAPLcs_chr1;BAPLcs_chr1;BAPLcs_chr1;BAPLcs_chr1;BAPLcs_chr1;BAPLcs_chr1;BAPLcs_chr1;BAP…	14881745;14884125;14885916;14885949;14887341;14887341;14898227;14898227;14900595;14900595;14901851;14901851;14904378;14904378;14906041;14906041;14907816;14907816;14908834;14908834;14910968;14910968;14912091;14912091;14913991;14913991;14915265;14915265;14918637;14918637;14919395;14919395;14920586;14920586	14881789;14884241;14886114;14886114;14887630;14887630;14898372;14898372;14900694;14900694;14901964;14901964;14904484;14904484;14906148;14906148;14907850;14907850;14908928;14908928;14911051;14911051;14912195;14912195;14914132;14914132;14915388;14915388;14918736;14918736;14919481;14919481;14920690;14920690	+;+;+;+;+;+;+;+;+;+;+;+;+;+;+;+;+;+;+;+;+;+;+;+;+;+;+;+;+;+;+;+;+;+	2103	213	232	120	420	723	818
CSbapl.913	BAPLcs_chr1;BAPLcs_chr1;BAPLcs_chr1	14928270;14929172;14929958	14928495;14929252;14930112	-;-;-	462	4	11	15	6	0	4
CSbapl.915	BAPLcs_chr1;BAPLcs_chr1;BAPLcs_chr1;BAPLcs_chr1;BAPLcs_chr1;BAPLcs_chr1;BAPLcs_chr1;BAPLcs_chr1;BAPLcs_chr1;BAPLcs_chr1;BAPLcs_chr1;BAPLcs_chr1;BAPLcs_chr1;BAPLcs_chr1;BAPLcs_chr1;BAPLcs_chr1;BAPLcs_chr1;BAPLcs_chr1;BAPLcs_chr1;BAPLcs_chr1;BAPLcs_chr1;BAPLcs_chr1;BAPLcs_chr1;BAPLcs_chr1;BAPLcs_chr1;BAPLcs_chr1;BAPLcs_chr1;BAPLcs_chr1;BAPLcs_chr1;BAPLcs_chr1;BAPLcs_chr1;BAPLcs_chr1;BAPLcs_chr1;BAP…	14971142;14972244;14985947;14987392;14989604;14991833;14992585;14994792;15029961;15033431;15034164;15036099;15038950;15040220;15041905;15042873;15043403;15044560;15046698;15047799;15056466;15056466;15066412;15066412;15067830;15067830;15069990;15069990;15072200;15072200;15075045;15075045;15075874;15075874;15077434;15077434;15078943;15078943;15080197;15080197;15094549;15095459;15097856;15099259;150…	14971345;14973158;14986063;14987628;14989765;14991988;14992689;14994935;15030141;15033606;15034318;15036289;15039108;15040381;15042030;15042945;15043547;15044743;15046897;15048695;15059675;15059675;15066528;15066528;15068066;15068066;15070151;15070151;15072355;15072355;15075149;15075149;15076028;15076028;15077517;15077517;15079084;15079084;15080375;15080373;15094927;15095632;15097930;15099362;150…	-;-;-;-;-;-;-;-;-;-;-;-;-;-;-;-;-;-;-;-;-;-;-;-;-;-;-;-;-;-;-;-;-;-;-;-;-;-;-;-;-;-;-;-;-;-;-;-;-;-;-;-;-;-;-;-;-;-;-;-;-;-;-;-;-;-;-;-;-;-;-;-;-;-;-;-;-;-;-;-;-;-;-;-;-;-;-;-;-;-;-;-;-;-;-;-;-;-;-;-;-;-;-;-;-;-;-;-;-;-;-;-;-;-;-;-;-;-;-;-;-;-;-;-;-;-;-;-;-;-;-;-	24525	4404	4903	3614	3534	5064	6017
CSbapl.916	BAPLcs_chr1;BAPLcs_chr1;BAPLcs_chr1	15117756;15119164;15121334	15117900;15119304;15121527	+;+;+	480	955	599	768	7737	5728	7546
CSbapl.918	BAPLcs_chr1;BAPLcs_chr1;BAPLcs_chr1;BAPLcs_chr1;BAPLcs_chr1;BAPLcs_chr1;BAPLcs_chr1;BAPLcs_chr1;BAPLcs_chr1;BAPLcs_chr1;BAPLcs_chr1;BAPLcs_chr1;BAPLcs_chr1;BAPLcs_chr1;BAPLcs_chr1;BAPLcs_chr1;BAPLcs_chr1;BAPLcs_chr1;BAPLcs_chr1;BAPLcs_chr1	15210521;15228714;15269439;15318878;15320674;15327847;15329042;15329524;15337970;15338798;15340030;15343717;15346273;15346985;15464117;15464117;15521700;15521700;15521700;15521700	15211276;15230756;15269768;15319774;15320873;15328030;15329186;15329596;15338095;15338959;15340188;15343907;15346427;15347170;15465217;15465217;15523250;15523250;15523250;15523250	+;+;+;+;+;+;+;+;+;+;+;+;+;+;+;+;+;+;+;+	8259	36	11	5	117	37	16
CSbapl.919	BAPLcs_chr1	15608518	15608946	-	429	0	0	0	0	0	2
CSbapl.923	BAPLcs_chr1	15618148	15618456	-	309	2	0	1	6	1	4
CSbapl.924	BAPLcs_chr1;BAPLcs_chr1;BAPLcs_chr1;BAPLcs_chr1;BAPLcs_chr1;BAPLcs_chr1;BAPLcs_chr1	15621242;15623588;15624695;15625386;15629450;15630182;15645485	15621286;15623795;15624827;15625498;15629545;15630342;15648355	+;+;+;+;+;+;+	3627	68	2964	198	49	54	75
CSbapl.928	BAPLcs_chr1;BAPLcs_chr1;BAPLcs_chr1;BAPLcs_chr1;BAPLcs_chr1;BAPLcs_chr1;BAPLcs_chr1;BAPLcs_chr1;BAPLcs_chr1;BAPLcs_chr1	15669049;15669049;15670759;15670759;15671493;15671493;15672783;15672783;15674244;15675407	15669742;15669742;15670835;15670796;15671570;15671570;15672902;15672992;15674342;15676252	+;+;+;+;+;+;+;+;+;+	2004	117	218	52	31	30	49
CSbapl.932	BAPLcs_chr1;BAPLcs_chr1;BAPLcs_chr1	15698840;15702437;15703389	15698952;15702489;15703537	-;-;-	315	8	9	9	7	20	11
CSbapl.943	BAPLcs_chr1;BAPLcs_chr1;BAPLcs_chr1;BAPLcs_chr1;BAPLcs_chr1;BAPLcs_chr1;BAPLcs_chr1;BAPLcs_chr1;BAPLcs_chr1;BAPLcs_chr1;BAPLcs_chr1;BAPLcs_chr1;BAPLcs_chr1;BAPLcs_chr1;BAPLcs_chr1;BAPLcs_chr1	15806291;15809627;15811296;15816890;15821012;15821725;15823081;15823587;15839800;15841122;15915101;15984987;15985588;15990359;15991429;15992502	15806418;15809746;15811391;15817000;15821058;15821892;15823181;15823618;15839843;15841301;15915207;15985169;15985720;15990523;15991769;15992540	-;-;-;-;-;-;-;-;-;-;-;-;-;-;-;-	1995	3	9	1	17	12	6
CSbapl.944	BAPLcs_chr1	15827401	15829071	+	1671	13	31	18	73	50	139
CSbapl.951	BAPLcs_chr1	15984047	15984349	-	303	1	0	0	0	0	0
CSbapl.953	BAPLcs_chr1	16011753	16012727	+	975	0	0	0	2	1	0
CSbapl.954	BAPLcs_chr1	16015137	16018466	+	3330	17	8	17	15	13	12
CSbapl.958	BAPLcs_chr1;BAPLcs_chr1;BAPLcs_chr1	16090981;16091850;16093020	16091046;16092109;16093188	+;+;+	495	0	0	0	0	0	1
CSbapl.960	BAPLcs_chr1;BAPLcs_chr1;BAPLcs_chr1;BAPLcs_chr1;BAPLcs_chr1	16106798;16107122;16108032;16109649;16109649	16107299;16107299;16109729;16110634;16110634	+;+;+;+;+	3105	293	675	89	123	166	140
CSbapl.961	BAPLcs_chr1	16105505	16106080	+	576	13	91	22	22	55	20
CSbapl.963	BAPLcs_chr1;BAPLcs_chr1;BAPLcs_chr1;BAPLcs_chr1;BAPLcs_chr1;BAPLcs_chr1;BAPLcs_chr1;BAPLcs_chr1	16126349;16131408;16132384;16134625;16139534;16141420;16142227;16145713	16126837;16131526;16132541;16134747;16139785;16141527;16142247;16145837	+;+;+;+;+;+;+;+	1395	0	4	0	3	4	3
CSbapl.965	BAPLcs_chr1;BAPLcs_chr1;BAPLcs_chr1;BAPLcs_chr1	16179080;16182542;16189908;16199383	16179291;16182997;16189999;16199405	-;-;-;-	783	8	7	1	10	2	9
CSbapl.968	BAPLcs_chr1	16230381	16230932	-	552	1	16	7	7	2	1
CSbapl.969	BAPLcs_chr1	16241757	16242440	-	684	5	14	1	2	3	3
CSbapl.970	BAPLcs_chr1	16248348	16248920	+	573	0	2	0	9	2	7
CSbapl.973	BAPLcs_chr1	16367890	16368339	-	450	0	0	0	5	0	0
CSbapl.975	BAPLcs_chr1	16433262	16433708	-	447	0	0	2	1	3	0
CSbapl.976	BAPLcs_chr1;BAPLcs_chr1;BAPLcs_chr1;BAPLcs_chr1;BAPLcs_chr1;BAPLcs_chr1;BAPLcs_chr1;BAPLcs_chr1;BAPLcs_chr1;BAPLcs_chr1;BAPLcs_chr1;BAPLcs_chr1	16451279;16505857;16509983;16510008;16526776;16527612;16530234;16532898;16535810;16538426;16539989;16540744	16451314;16506037;16510321;16510310;16526836;16527670;16530290;16532924;16536232;16538713;16541973;16541973	+;+;+;+;+;+;+;+;+;+;+;+	3456	17	45	19	52	17	35
CSbapl.981	BAPLcs_chr1	16589629	16590261	+	633	0	0	0	0	0	1
CSbapl.983	BAPLcs_chr1;BAPLcs_chr1;BAPLcs_chr1;BAPLcs_chr1	16628644;16630441;16631603;16632402	16629046;16630702;16631766;16632613	+;+;+;+	1041	1	4	16	58	64	83
CSbapl.990	BAPLcs_chr1;BAPLcs_chr1;BAPLcs_chr1;BAPLcs_chr1;BAPLcs_chr1;BAPLcs_chr1;BAPLcs_chr1;BAPLcs_chr1;BAPLcs_chr1;BAPLcs_chr1;BAPLcs_chr1;BAPLcs_chr1;BAPLcs_chr1;BAPLcs_chr1;BAPLcs_chr1;BAPLcs_chr1;BAPLcs_chr1;BAPLcs_chr1;BAPLcs_chr1;BAPLcs_chr1;BAPLcs_chr1;BAPLcs_chr1;BAPLcs_chr1;BAPLcs_chr1;BAPLcs_chr1;BAPLcs_chr1;BAPLcs_chr1;BAPLcs_chr1;BAPLcs_chr1;BAPLcs_chr1;BAPLcs_chr1;BAPLcs_chr1;BAPLcs_chr1;BAP…	16685209;16692689;16700048;16704458;16707185;16707892;16708506;16725342;16726229;16726962;16730489;16731222;16732018;16734374;16735527;16736393;16737593;16738294;16738965;16742851;16744087;16752828;16753440;16753790;16757063;16759860;16789431;16807492;16811014;16821836;16849788;16850957;16851823;16853701;16854282;16861277;16862890;16864161;16864760;16866661;16867840;16868907	16685301;16692836;16700164;16704613;16707306;16707935;16708625;16725452;16726275;16727120;16730601;16731279;16732185;16734512;16735643;16736442;16737754;16738400;16738996;16742897;16744248;16752925;16753474;16753897;16757118;16760030;16789546;16807520;16811121;16821934;16849834;16851124;16851923;16853732;16854325;16861456;16863026;16864235;16864892;16866825;16868180;16868945	-;-;-;-;-;-;-;-;-;-;-;-;-;-;-;-;-;-;-;-;-;-;-;-;-;-;-;-;-;-;-;-;-;-;-;-;-;-;-;-;-;-	4554	36	70	37	58	103	208
CSbapl.1013	BAPLcs_chr1;BAPLcs_chr1;BAPLcs_chr1	16930345;16957117;16959687	16930490;16957354;16959854	+;+;+	552	1	116	11	0	4	0
CSbapl.1025	BAPLcs_chr1;BAPLcs_chr1;BAPLcs_chr1	17022118;17058539;17065774	17022272;17058776;17065947	+;+;+	567	14	44	5	2	42	9
CSbapl.1029	BAPLcs_chr1	17047575	17050130	+	2556	0	0	0	2	1	0
CSbapl.1031	BAPLcs_chr1	17062257	17063003	-	747	0	3	0	3	6	0
CSbapl.1038	BAPLcs_chr1	17160829	17161743	-	915	41	189	134	11	13	59
CSbapl.1039	BAPLcs_chr1	17180681	17181595	-	915	30	134	111	9	19	35
CSbapl.1040	BAPLcs_chr1	17210478	17211392	-	915	18	126	33	1	9	11
CSbapl.1041	BAPLcs_chr1	17231413	17232390	-	978	56	132	141	17	26	10
CSbapl.1042	BAPLcs_chr1;BAPLcs_chr1;BAPLcs_chr1;BAPLcs_chr1;BAPLcs_chr1;BAPLcs_chr1;BAPLcs_chr1;BAPLcs_chr1;BAPLcs_chr1;BAPLcs_chr1;BAPLcs_chr1;BAPLcs_chr1;BAPLcs_chr1;BAPLcs_chr1;BAPLcs_chr1;BAPLcs_chr1;BAPLcs_chr1;BAPLcs_chr1;BAPLcs_chr1;BAPLcs_chr1;BAPLcs_chr1;BAPLcs_chr1;BAPLcs_chr1;BAPLcs_chr1;BAPLcs_chr1;BAPLcs_chr1;BAPLcs_chr1;BAPLcs_chr1;BAPLcs_chr1;BAPLcs_chr1;BAPLcs_chr1;BAPLcs_chr1;BAPLcs_chr1;BAP…	17247476;17247476;17253318;17256645;17256645;17257105;17257165;17257165;17257165;17257165;17258087;17258087;17258087;17258087;17258087;17258087;17260296;17260296;17260296;17260296;17260296;17260296;17262256;17262256;17262256;17262256;17262256;17262256;17264105;17264105;17264105;17264105;17264105;17265021;17265686;17265686;17265686;17265686;17265686;17265686;17267611;17267611;17267611;17267611;172…	17247622;17247622;17253338;17256695;17256698;17257194;17257194;17257194;17257194;17257194;17258215;17258215;17258215;17258215;17258215;17258215;17260368;17260368;17260368;17260368;17260368;17260368;17262357;17262357;17262357;17262357;17262357;17262357;17264229;17264229;17264229;17264229;17264229;17265145;17265805;17265805;17265805;17265805;17265805;17265805;17267661;17267661;17267661;17267661;172…	-;-;-;-;-;-;-;-;-;-;-;-;-;-;-;-;-;-;-;-;-;-;-;-;-;-;-;-;-;-;-;-;-;-;-;-;-;-;-;-;-;-;-;-;-;-;-;-;-;-;-;-;-;-;-;-;-;-;-;-;-;-;-;-;-;-;-;-;-;-;-;-;-;-;-;-;-;-;-;-;-;-;-;-;-;-;-;-;-;-;-;-;-;-;-;-;-	2075	465	684	439	858	892	815
CSbapl.1046	BAPLcs_chr1	17325673	17326488	-	816	0	0	0	1	0	0
CSbapl.1048	BAPLcs_chr1;BAPLcs_chr1;BAPLcs_chr1	17337630;17387073;17389651	17337819;17387246;17389721	+;+;+	435	3	19	14	10	22	18
CSbapl.1052	BAPLcs_chr1;BAPLcs_chr1;BAPLcs_chr1;BAPLcs_chr1	17357350;17358206;17359271;17360926	17357561;17358369;17359532;17361256	-;-;-;-	969	8	6	6	87	63	121
CSbapl.1056	BAPLcs_chr1;BAPLcs_chr1;BAPLcs_chr1;BAPLcs_chr1;BAPLcs_chr1;BAPLcs_chr1;BAPLcs_chr1;BAPLcs_chr1;BAPLcs_chr1;BAPLcs_chr1;BAPLcs_chr1;BAPLcs_chr1;BAPLcs_chr1;BAPLcs_chr1;BAPLcs_chr1;BAPLcs_chr1;BAPLcs_chr1;BAPLcs_chr1;BAPLcs_chr1;BAPLcs_chr1;BAPLcs_chr1;BAPLcs_chr1;BAPLcs_chr1;BAPLcs_chr1;BAPLcs_chr1;BAPLcs_chr1;BAPLcs_chr1;BAPLcs_chr1;BAPLcs_chr1;BAPLcs_chr1;BAPLcs_chr1;BAPLcs_chr1;BAPLcs_chr1;BAP…	17435882;17439136;17441029;17480906;17516349;17516349;17519967;17519967;17522306;17522306;17527269;17527269;17530986;17530986;17532786;17532786;17533602;17533602;17550691;17562661;17568536;17581305;17688659;17773936;17788314;17840572;17840572;17946314;17952141;17952141;17954581;18121676;18131585;18132321;18217905;18241397;18300340;18308551;18318327;18331263;18335482;18336329;18337574;18402297;184…	17437860;17439432;17441467;17483878;17518468;17518468;17520263;17520263;17522734;17522734;17527295;17527295;17531042;17531042;17532844;17532844;17533668;17533668;17550993;17562844;17568553;17581461;17689836;17775758;17788614;17844015;17844015;17948262;17952437;17952437;17954989;18124020;18131881;18132747;18218042;18241436;18302369;18308847;18318467;18331325;18335540;18336395;18337876;18402723;184…	-;-;-;-;-;-;-;-;-;-;-;-;-;-;-;-;-;-;-;-;-;-;-;-;-;-;-;-;-;-;-;-;-;-;-;-;-;-;-;-;-;-;-;-;-;-;-	30337	203	359	131	435	242	313
CSbapl.1057	BAPLcs_chr1;BAPLcs_chr1;BAPLcs_chr1;BAPLcs_chr1;BAPLcs_chr1;BAPLcs_chr1;BAPLcs_chr1;BAPLcs_chr1;BAPLcs_chr1;BAPLcs_chr1;BAPLcs_chr1;BAPLcs_chr1;BAPLcs_chr1;BAPLcs_chr1;BAPLcs_chr1;BAPLcs_chr1;BAPLcs_chr1;BAPLcs_chr1;BAPLcs_chr1;BAPLcs_chr1	17443067;17608173;17609550;18723309;18813064;18813145;18813712;18813716;18816939;18816939;18818985;18818985;18820382;18820382;18822420;18822420;18823498;18823498;18824500;18824500	17443537;17608658;17610188;18725471;18813252;18813248;18813782;18813782;18817059;18817059;18819028;18819028;18820426;18820426;18822510;18822510;18823550;18823550;18824858;18824858	+;+;+;+;+;+;+;+;+;+;+;+;+;+;+;+;+;+;+;+	4732	14	18	23	25	11	24
CSbapl.1058	BAPLcs_chr1	18890475	18890861	-	387	0	0	16	2	0	0
CSbapl.1061	BAPLcs_chr1;BAPLcs_chr1;BAPLcs_chr1;BAPLcs_chr1;BAPLcs_chr1;BAPLcs_chr1;BAPLcs_chr1;BAPLcs_chr1	18915267;18915267;18920367;18920367;18921603;18921627;18922369;18922369	18916356;18916356;18920450;18920516;18921783;18921783;18922537;18922537	+;+;+;+;+;+;+;+	1590	9	27	9	153	99	56
CSbapl.1082	BAPLcs_chr1	19060448	19060951	+	504	0	0	0	2	0	0
CSbapl.1085	BAPLcs_chr1	19072082	19073407	+	1326	0	0	0	1	2	0
CSbapl.1086	BAPLcs_chr1	19073879	19075507	+	1629	0	0	0	0	4	0
CSbapl.1091	BAPLcs_chr1;BAPLcs_chr1;BAPLcs_chr1	19097538;19100939;19114652	19097742;19101144;19115053	+;+;+	813	0	6	3	9	15	16
CSbapl.1103	BAPLcs_chr1;BAPLcs_chr1;BAPLcs_chr1;BAPLcs_chr1;BAPLcs_chr1;BAPLcs_chr1;BAPLcs_chr1;BAPLcs_chr1;BAPLcs_chr1;BAPLcs_chr1;BAPLcs_chr1;BAPLcs_chr1;BAPLcs_chr1;BAPLcs_chr1;BAPLcs_chr1;BAPLcs_chr1;BAPLcs_chr1;BAPLcs_chr1;BAPLcs_chr1;BAPLcs_chr1;BAPLcs_chr1	19155411;19155411;19155411;19156346;19156346;19156346;19157149;19157149;19157149;19158179;19158179;19158179;19160364;19160364;19160364;19161799;19161799;19161799;19163087;19163087;19163087	19155486;19155486;19155486;19156384;19156384;19156384;19157442;19157427;19157442;19158202;19158202;19158202;19160443;19160443;19160443;19161882;19161882;19161882;19163221;19163221;19163221	-;-;-;-;-;-;-;-;-;-;-;-;-;-;-;-;-;-;-;-;-	732	1274	1615	1027	1246	3453	2615
CSbapl.1106	BAPLcs_chr1;BAPLcs_chr1;BAPLcs_chr1;BAPLcs_chr1;BAPLcs_chr1;BAPLcs_chr1;BAPLcs_chr1;BAPLcs_chr1;BAPLcs_chr1;BAPLcs_chr1;BAPLcs_chr1;BAPLcs_chr1;BAPLcs_chr1;BAPLcs_chr1	19179561;19180521;19183288;19192040;19193293;19194740;19197415;19200283;19203605;19205104;19208858;19209393;19211827;19212822	19179713;19180590;19183379;19192235;19193365;19194802;19197571;19200402;19203743;19205190;19208931;19209474;19211904;19212952	-;-;-;-;-;-;-;-;-;-;-;-;-;-	1515	129	267	107	248	316	392
CSbapl.1108	BAPLcs_chr1	19187053	19188138	-	1086	7	1	14	5	0	0
CSbapl.1109	BAPLcs_chr1	19189114	19190028	-	915	2	0	1	1	0	1
CSbapl.1112	BAPLcs_chr1;BAPLcs_chr1;BAPLcs_chr1;BAPLcs_chr1;BAPLcs_chr1;BAPLcs_chr1;BAPLcs_chr1;BAPLcs_chr1;BAPLcs_chr1;BAPLcs_chr1;BAPLcs_chr1;BAPLcs_chr1;BAPLcs_chr1;BAPLcs_chr1;BAPLcs_chr1;BAPLcs_chr1;BAPLcs_chr1;BAPLcs_chr1;BAPLcs_chr1;BAPLcs_chr1;BAPLcs_chr1;BAPLcs_chr1;BAPLcs_chr1;BAPLcs_chr1;BAPLcs_chr1;BAPLcs_chr1;BAPLcs_chr1;BAPLcs_chr1;BAPLcs_chr1;BAPLcs_chr1;BAPLcs_chr1;BAPLcs_chr1;BAPLcs_chr1;BAP…	19235788;19235896;19239821;19239821;19242164;19242164;19243834;19243834;19251490;19251490;19252223;19252223;19252272;19253622;19253622;19253622;19255521;19255521;19255521;19257401;19257401;19257401;19260602;19260602;19260602;19261783;19261783;19261783;19268729;19268729;19268729;19270124;19270124;19270124;19271177;19271177	19235918;19235918;19239898;19239898;19242245;19242245;19243907;19243907;19251576;19251576;19252361;19252361;19252361;19253741;19253741;19253741;19255677;19255677;19255677;19257463;19257463;19257463;19260674;19260674;19260674;19261978;19261978;19261978;19268820;19268820;19268820;19270193;19270193;19270268;19271329;19271329	+;+;+;+;+;+;+;+;+;+;+;+;+;+;+;+;+;+;+;+;+;+;+;+;+;+;+;+;+;+;+;+;+;+;+;+	1590	74	145	60	196	192	330
CSbapl.1113	BAPLcs_chr1;BAPLcs_chr1;BAPLcs_chr1;BAPLcs_chr1;BAPLcs_chr1;BAPLcs_chr1;BAPLcs_chr1;BAPLcs_chr1;BAPLcs_chr1;BAPLcs_chr1;BAPLcs_chr1	19281083;19282916;19286636;19300310;19301574;19304011;19307281;19310831;19311847;19317844;19341988	19281235;19282985;19286727;19300505;19301646;19304073;19307437;19310950;19311985;19317917;19342629	-;-;-;-;-;-;-;-;-;-;-	1779	26	89	30	360	482	453
CSbapl.1116	BAPLcs_chr1	19348279	19348983	-	705	1	2	0	6	1	0
CSbapl.1117	BAPLcs_chr1	19349737	19350357	-	621	1	0	2	5	0	2
CSbapl.1118	BAPLcs_chr1;BAPLcs_chr1;BAPLcs_chr1;BAPLcs_chr1;BAPLcs_chr1;BAPLcs_chr1;BAPLcs_chr1;BAPLcs_chr1;BAPLcs_chr1;BAPLcs_chr1;BAPLcs_chr1;BAPLcs_chr1;BAPLcs_chr1;BAPLcs_chr1;BAPLcs_chr1;BAPLcs_chr1;BAPLcs_chr1;BAPLcs_chr1;BAPLcs_chr1;BAPLcs_chr1;BAPLcs_chr1;BAPLcs_chr1;BAPLcs_chr1;BAPLcs_chr1;BAPLcs_chr1;BAPLcs_chr1;BAPLcs_chr1;BAPLcs_chr1;BAPLcs_chr1;BAPLcs_chr1;BAPLcs_chr1;BAPLcs_chr1	19376171;19378601;19379391;19379391;19382737;19383816;19383816;19385374;19385374;19387051;19387051;19392482;19392482;19394402;19394402;19396227;19396227;19397601;19397601;19403595;19403595;19404720;19404720;19408769;19408769;19409834;19409834;19415308;19417225;19427708;19430239;19446437	19376552;19378620;19379513;19379513;19383327;19383849;19383849;19385461;19385461;19387158;19387158;19392656;19392656;19394580;19394580;19396346;19396346;19398353;19398353;19403666;19403666;19404828;19404828;19408986;19408986;19410134;19410134;19415406;19417377;19427868;19430391;19447175	-;-;-;-;-;-;-;-;-;-;-;-;-;-;-;-;-;-;-;-;-;-;-;-;-;-;-;-;-;-;-;-	4578	47	72	62	72	87	54
CSbapl.1120	BAPLcs_chr1	19435788	19436153	-	366	1	0	2	5	8	0
CSbapl.1129	BAPLcs_chr1;BAPLcs_chr1;BAPLcs_chr1;BAPLcs_chr1;BAPLcs_chr1;BAPLcs_chr1;BAPLcs_chr1;BAPLcs_chr1;BAPLcs_chr1	19491925;19491925;19494850;19494850;19497466;19497466;19500065;19502693;19513447	19492085;19492085;19494936;19494936;19497608;19497582;19500151;19502717;19513724	-;-;-;-;-;-;-;-;-	781	46	33	2	6	2	12
CSbapl.1134	BAPLcs_chr1;BAPLcs_chr1;BAPLcs_chr1;BAPLcs_chr1;BAPLcs_chr1;BAPLcs_chr1;BAPLcs_chr1;BAPLcs_chr1;BAPLcs_chr1;BAPLcs_chr1;BAPLcs_chr1;BAPLcs_chr1;BAPLcs_chr1;BAPLcs_chr1;BAPLcs_chr1;BAPLcs_chr1;BAPLcs_chr1;BAPLcs_chr1;BAPLcs_chr1;BAPLcs_chr1;BAPLcs_chr1;BAPLcs_chr1;BAPLcs_chr1;BAPLcs_chr1;BAPLcs_chr1	19514851;19517238;19519612;19520898;19523141;19524317;19525654;19526930;19528157;19529313;19537118;19538991;19540205;19542381;19543582;19549418;19550209;19551085;19552822;19554189;19555998;19557185;19558168;19558706;19561275	19515009;19517316;19519667;19521004;19523224;19524400;19525717;19527001;19528314;19529402;19537184;19539027;19540275;19542483;19543678;19549475;19550260;19551271;19552935;19554236;19556111;19557290;19558242;19558766;19561438	-;-;-;-;-;-;-;-;-;-;-;-;-;-;-;-;-;-;-;-;-;-;-;-;-	2307	241	273	241	118	181	190
CSbapl.1139	BAPLcs_chr1;BAPLcs_chr1;BAPLcs_chr1;BAPLcs_chr1;BAPLcs_chr1;BAPLcs_chr1;BAPLcs_chr1;BAPLcs_chr1;BAPLcs_chr1;BAPLcs_chr1;BAPLcs_chr1;BAPLcs_chr1;BAPLcs_chr1;BAPLcs_chr1;BAPLcs_chr1;BAPLcs_chr1;BAPLcs_chr1;BAPLcs_chr1;BAPLcs_chr1;BAPLcs_chr1;BAPLcs_chr1;BAPLcs_chr1;BAPLcs_chr1;BAPLcs_chr1;BAPLcs_chr1;BAPLcs_chr1;BAPLcs_chr1;BAPLcs_chr1;BAPLcs_chr1;BAPLcs_chr1;BAPLcs_chr1;BAPLcs_chr1;BAPLcs_chr1;BAP…	19579391;19581289;19583065;19583106;19584445;19584445;19586532;19586532;19587643;19587643;19588520;19588520;19590178;19590178;19591247;19591247;19593449;19593449;19595714;19595714;19597106;19597106;19597794;19597794;19600463;19600463;19601057;19601057;19602691;19602691;19603982;19603982;19605249;19605249;19605689;19605689;19606443;19606443;19607133;19607133;19609289;19609289;19611462;19611462;196…	19579606;19581394;19583180;19583180;19584511;19584511;19586612;19586612;19587755;19587755;19588607;19588607;19590242;19590242;19591356;19591356;19593593;19593593;19595751;19595751;19597165;19597165;19597869;19597869;19600582;19600582;19601146;19601146;19602762;19602762;19604043;19604043;19605357;19605357;19605835;19605835;19606499;19606499;19607249;19607249;19609408;19609408;19611605;19611605;196…	+;+;+;+;+;+;+;+;+;+;+;+;+;+;+;+;+;+;+;+;+;+;+;+;+;+;+;+;+;+;+;+;+;+;+;+;+;+;+;+;+;+;+;+;+;+;+;+;+;+;+;+;+;+;+;+;+;+;+;+;+;+;+;+;+;+;+;+;+;+;+;+;+;+;+;+;+;+;+;+;+;+;+;+;+;+;+;+;+;+;+;+;+;+;+;+;+;+;+;+;+;+;+;+;+;+;+;+;+;+;+;+;+;+;+;+;+;+;+;+;+;+	6681	403	484	405	2026	2074	2631
CSbapl.1141	BAPLcs_chr1;BAPLcs_chr1;BAPLcs_chr1;BAPLcs_chr1;BAPLcs_chr1;BAPLcs_chr1;BAPLcs_chr1;BAPLcs_chr1	19714229;19717058;19723826;19726012;19728083;19731267;19732471;19741449	19714609;19717193;19723926;19726186;19728180;19731383;19732572;19741556	-;-;-;-;-;-;-;-	1218	1	19	0	4	3	5
CSbapl.1143	BAPLcs_chr1;BAPLcs_chr1;BAPLcs_chr1;BAPLcs_chr1;BAPLcs_chr1;BAPLcs_chr1;BAPLcs_chr1;BAPLcs_chr1;BAPLcs_chr1;BAPLcs_chr1;BAPLcs_chr1;BAPLcs_chr1;BAPLcs_chr1;BAPLcs_chr1;BAPLcs_chr1	19759718;19759770;19759851;19760687;19760687;19760968;19760968;19762167;19763577;19763577;19766654;19766654;19767914;19767914;19768301	19759813;19759947;19759947;19760775;19760775;19761078;19761078;19762289;19763705;19763705;19766861;19766861;19767969;19768002;19768330	-;-;-;-;-;-;-;-;-;-;-;-;-;-;-	1009	604	1201	367	76	471	341
CSbapl.1148	BAPLcs_chr1;BAPLcs_chr1;BAPLcs_chr1;BAPLcs_chr1;BAPLcs_chr1	19810566;19813656;19814207;19815468;19816753	19810781;19813812;19814292;19815574;19816888	-;-;-;-;-	702	5	18	2	1178	1005	1077
CSbapl.1149	BAPLcs_chr1;BAPLcs_chr1;BAPLcs_chr1;BAPLcs_chr1;BAPLcs_chr1;BAPLcs_chr1;BAPLcs_chr1;BAPLcs_chr1;BAPLcs_chr1;BAPLcs_chr1;BAPLcs_chr1;BAPLcs_chr1;BAPLcs_chr1	19835640;19835640;19835640;19946682;19951862;19953498;19957508;19961830;19964344;19967296;19969183;20019806;20043440	19836902;19836902;19836902;19946856;19952029;19953603;19957545;19961981;19964421;19967389;19969288;20019950;20043553	-;-;-;-;-;-;-;-;-;-;-;-;-	2439	3	5	4	280	41	45
CSbapl.1150	BAPLcs_chr1;BAPLcs_chr1;BAPLcs_chr1;BAPLcs_chr1;BAPLcs_chr1;BAPLcs_chr1;BAPLcs_chr1;BAPLcs_chr1;BAPLcs_chr1;BAPLcs_chr1;BAPLcs_chr1;BAPLcs_chr1;BAPLcs_chr1;BAPLcs_chr1;BAPLcs_chr1;BAPLcs_chr1;BAPLcs_chr1;BAPLcs_chr1;BAPLcs_chr1;BAPLcs_chr1;BAPLcs_chr1;BAPLcs_chr1;BAPLcs_chr1;BAPLcs_chr1;BAPLcs_chr1;BAPLcs_chr1;BAPLcs_chr1;BAPLcs_chr1;BAPLcs_chr1;BAPLcs_chr1;BAPLcs_chr1;BAPLcs_chr1;BAPLcs_chr1;BAP…	19866324;19867716;19869982;19872487;19875542;19879403;19881187;19888104;19893196;19895072;19896927;20050880;20052189;20053402;20053868;20056376;20082491;20082491;20083599;20083599;20086726;20086726;20088142;20089359;20089359;20089665;20089665;20090493;20090493;20092851;20092851;20108268;20108268;20117221;20117221;20118410;20118410;20121948;20121948;20123943;20123943;20125574;20126201;20126201;201…	19866415;19867809;19870059;19872638;19875579;19879508;19881354;19888248;19893312;19895123;19898203;20051015;20052295;20053487;20054024;20056591;20082546;20082546;20083806;20083806;20086854;20086854;20088264;20089469;20089469;20089753;20089753;20090709;20090709;20092964;20092964;20108375;20108375;20117322;20117322;20118526;20118526;20122045;20122045;20124117;20124117;20125654;20126301;20126301;201…	+;+;+;+;+;+;+;+;+;+;+;+;+;+;+;+;+;+;+;+;+;+;+;+;+;+;+;+;+;+;+;+;+;+;+;+;+;+;+;+;+;+;+;+;+;+;+;+;+;+;+;+;+;+;+;+;+;+;+;+	7788	1203	1994	616	1407	2102	2080
CSbapl.1151	BAPLcs_chr1;BAPLcs_chr1	20059725;20060553	20059960;20060649	-;-	333	2	0	0	2	1	4
CSbapl.1153	BAPLcs_chr1;BAPLcs_chr1;BAPLcs_chr1;BAPLcs_chr1;BAPLcs_chr1;BAPLcs_chr1;BAPLcs_chr1;BAPLcs_chr1;BAPLcs_chr1;BAPLcs_chr1;BAPLcs_chr1	20137565;20138867;20141099;20141863;20143459;20145475;20146654;20148016;20150360;20153041;20154477	20137615;20138981;20141244;20141949;20143576;20145538;20146765;20148111;20150495;20153168;20154584	-;-;-;-;-;-;-;-;-;-;-	1161	138	79	88	372	351	355
CSbapl.1154	BAPLcs_chr1;BAPLcs_chr1	20191402;20205694	20191707;20205954	-;-	567	5	0	0	0	0	2
CSbapl.1155	BAPLcs_chr1;BAPLcs_chr1;BAPLcs_chr1;BAPLcs_chr1;BAPLcs_chr1;BAPLcs_chr1;BAPLcs_chr1	20207423;20212525;20213780;20218853;20222788;20226458;20249653	20207647;20212713;20214128;20219064;20222886;20226565;20250009	-;-;-;-;-;-;-	1539	26	0	0	0	0	0
CSbapl.1163	BAPLcs_chr1	20312959	20313705	+	747	0	0	0	2	0	0
CSbapl.1166	BAPLcs_chr1;BAPLcs_chr1;BAPLcs_chr1;BAPLcs_chr1;BAPLcs_chr1;BAPLcs_chr1;BAPLcs_chr1;BAPLcs_chr1;BAPLcs_chr1;BAPLcs_chr1;BAPLcs_chr1;BAPLcs_chr1;BAPLcs_chr1;BAPLcs_chr1;BAPLcs_chr1;BAPLcs_chr1;BAPLcs_chr1	20376901;20378281;20379206;20380669;20382229;20386035;20386472;20392248;20392739;20393886;20395901;20400437;20402416;20402988;20407015;20411279;20412723	20376963;20378472;20379404;20380808;20382336;20386142;20386561;20392397;20393050;20394008;20395979;20400546;20402516;20403126;20407769;20411423;20412737	-;-;-;-;-;-;-;-;-;-;-;-;-;-;-;-;-	2829	830	1197	503	511	1342	1587
CSbapl.1174	BAPLcs_chr1;BAPLcs_chr1	20530638;20531732	20530889;20535322	-;-	3843	0	0	0	3	1	0
CSbapl.1186	BAPLcs_chr1	20588875	20590053	-	1179	4	5	0	3	0	2
CSbapl.1189	BAPLcs_chr1	20599213	20599641	+	429	0	1	0	0	0	0
CSbapl.1193	BAPLcs_chr1;BAPLcs_chr1;BAPLcs_chr1;BAPLcs_chr1;BAPLcs_chr1	20641415;20646907;20646927;20662179;20662179	20641455;20647047;20647047;20662679;20662679	-;-;-;-;-	683	20	39	10	47	13	39
CSbapl.1195	BAPLcs_chr1;BAPLcs_chr1	20667159;20730337	20667230;20730618	+;+	354	0	1	2	3	376	5
CSbapl.1200	BAPLcs_chr1	20715334	20715792	+	459	0	0	0	0	0	2
CSbapl.1205	BAPLcs_chr1	20740079	20740780	+	702	0	1	0	0	0	0
CSbapl.1210	BAPLcs_chr1;BAPLcs_chr1;BAPLcs_chr1;BAPLcs_chr1;BAPLcs_chr1;BAPLcs_chr1;BAPLcs_chr1;BAPLcs_chr1;BAPLcs_chr1;BAPLcs_chr1;BAPLcs_chr1	20797895;20798902;20801505;20816358;20817306;20821990;20823042;20826442;20827296;20828144;20831198	20798131;20799109;20801623;20816560;20817474;20822158;20823139;20826586;20827378;20828309;20831316	+;+;+;+;+;+;+;+;+;+;+	1716	3	0	2	4	0	0
CSbapl.1215	BAPLcs_chr1;BAPLcs_chr1;BAPLcs_chr1;BAPLcs_chr1;BAPLcs_chr1;BAPLcs_chr1;BAPLcs_chr1;BAPLcs_chr1;BAPLcs_chr1;BAPLcs_chr1;BAPLcs_chr1;BAPLcs_chr1;BAPLcs_chr1;BAPLcs_chr1;BAPLcs_chr1;BAPLcs_chr1;BAPLcs_chr1;BAPLcs_chr1;BAPLcs_chr1;BAPLcs_chr1;BAPLcs_chr1;BAPLcs_chr1;BAPLcs_chr1;BAPLcs_chr1;BAPLcs_chr1;BAPLcs_chr1;BAPLcs_chr1	20847462;20847462;20848560;20848560;20850758;20850758;20861422;20861422;20863074;20863074;20871112;20871112;20871793;20872865;20875911;20878164;20879154;20879836;20880257;20882464;20883091;20884876;20887641;20889983;20893425;20895504;20902751	20847485;20847485;20848694;20848694;20850856;20850856;20861568;20861568;20863217;20863217;20871213;20871159;20871885;20873032;20876038;20878256;20879290;20879924;20880358;20882666;20883185;20884934;20887805;20890087;20893571;20895572;20902798	-;-;-;-;-;-;-;-;-;-;-;-;-;-;-;-;-;-;-;-;-;-;-;-;-;-;-	2352	79	94	67	66	106	66
CSbapl.1219	BAPLcs_chr1;BAPLcs_chr1;BAPLcs_chr1;BAPLcs_chr1;BAPLcs_chr1;BAPLcs_chr1;BAPLcs_chr1;BAPLcs_chr1;BAPLcs_chr1;BAPLcs_chr1;BAPLcs_chr1;BAPLcs_chr1;BAPLcs_chr1;BAPLcs_chr1;BAPLcs_chr1;BAPLcs_chr1	20917093;20917093;20918026;20918026;20919853;20919853;20922445;20922445;20924382;20924382;20926039;20926039;20929324;20929324;20931192;20931192	20917300;20917300;20918123;20918123;20919987;20919987;20922560;20922560;20924483;20924483;20926166;20926166;20929424;20929424;20931365;20931365	-;-;-;-;-;-;-;-;-;-;-;-;-;-;-;-	1062	299	317	223	537	644	902
CSbapl.1220	BAPLcs_chr1;BAPLcs_chr1;BAPLcs_chr1;BAPLcs_chr1;BAPLcs_chr1;BAPLcs_chr1;BAPLcs_chr1;BAPLcs_chr1;BAPLcs_chr1;BAPLcs_chr1;BAPLcs_chr1;BAPLcs_chr1;BAPLcs_chr1;BAPLcs_chr1;BAPLcs_chr1;BAPLcs_chr1;BAPLcs_chr1;BAPLcs_chr1;BAPLcs_chr1;BAPLcs_chr1;BAPLcs_chr1;BAPLcs_chr1	20936634;20938481;20938492;20938492;20941004;20941004;20941004;20943390;20943390;20943390;20944297;20944297;20944387;20944875;20944875;20944875;20946330;20946330;20946330;20948750;20948750;20948750	20936973;20938541;20938541;20938541;20941078;20941078;20941078;20943456;20943456;20943456;20944401;20944401;20944401;20944949;20944949;20944949;20946447;20946447;20946447;20948883;20948883;20948883	+;+;+;+;+;+;+;+;+;+;+;+;+;+;+;+;+;+;+;+;+;+	975	392	453	356	239	281	465
CSbapl.1224	BAPLcs_chr1;BAPLcs_chr1;BAPLcs_chr1;BAPLcs_chr1;BAPLcs_chr1;BAPLcs_chr1;BAPLcs_chr1;BAPLcs_chr1;BAPLcs_chr1	20961685;20961685;20961685;20965125;20965125;20965125;20968806;20972466;20974214	20961950;20961950;20961950;20965218;20965218;20965200;20968859;20972561;20974351	-;-;-;-;-;-;-;-;-	648	715	729	523	395	868	776
CSbapl.1227	BAPLcs_chr1;BAPLcs_chr1;BAPLcs_chr1;BAPLcs_chr1;BAPLcs_chr1;BAPLcs_chr1;BAPLcs_chr1;BAPLcs_chr1;BAPLcs_chr1;BAPLcs_chr1;BAPLcs_chr1;BAPLcs_chr1;BAPLcs_chr1;BAPLcs_chr1;BAPLcs_chr1;BAPLcs_chr1;BAPLcs_chr1;BAPLcs_chr1;BAPLcs_chr1;BAPLcs_chr1;BAPLcs_chr1;BAPLcs_chr1;BAPLcs_chr1;BAPLcs_chr1;BAPLcs_chr1	20981663;20996056;20996155;20997529;20997529;21001238;21001238;21006494;21006494;21007104;21007104;21009075;21009075;21014153;21014153;21015397;21016355;21017008;21024609;21025029;21028821;21030349;21031753;21032685;21034193	20981830;20996229;20996229;20997673;20997673;21001992;21001992;21006632;21006632;21007204;21007204;21009184;21009184;21014231;21014231;21015519;21016666;21017157;21024698;21025136;21028928;21030488;21031951;21032876;21034255	+;+;+;+;+;+;+;+;+;+;+;+;+;+;+;+;+;+;+;+;+;+;+;+;+	3156	740	1114	738	606	1275	1060
CSbapl.1229	BAPLcs_chr1;BAPLcs_chr1;BAPLcs_chr1;BAPLcs_chr1;BAPLcs_chr1	21059247;21063230;21067704;21068758;21070870	21059327;21063298;21067816;21068901;21070897	+;+;+;+;+	435	10	13	10	51	58	48
CSbapl.1231	BAPLcs_chr1	21078544	21079395	-	852	25	5	0	6	0	1
CSbapl.1232	BAPLcs_chr1;BAPLcs_chr1	21083868;21105717	21083891;21106187	+;+	495	0	4	0	0	0	0
CSbapl.1234	BAPLcs_chr1	21132845	21133177	-	333	0	0	0	0	2	0
CSbapl.1238	BAPLcs_chr1;BAPLcs_chr1;BAPLcs_chr1;BAPLcs_chr1;BAPLcs_chr1;BAPLcs_chr1;BAPLcs_chr1;BAPLcs_chr1;BAPLcs_chr1;BAPLcs_chr1;BAPLcs_chr1;BAPLcs_chr1;BAPLcs_chr1;BAPLcs_chr1;BAPLcs_chr1;BAPLcs_chr1;BAPLcs_chr1;BAPLcs_chr1	21167978;21171128;21190702;21196909;21197444;21200415;21201433;21202432;21204107;21205198;21207643;21208991;21209769;21210730;21212458;21217231;21220318;21221096	21168221;21171182;21190835;21197022;21197671;21200461;21201606;21202582;21204271;21205311;21207756;21209135;21209854;21210968;21212718;21217356;21220483;21221553	+;+;+;+;+;+;+;+;+;+;+;+;+;+;+;+;+;+	3021	31	19	4	52	44	49
CSbapl.1244	BAPLcs_chr1;BAPLcs_chr1;BAPLcs_chr1;BAPLcs_chr1;BAPLcs_chr1;BAPLcs_chr1;BAPLcs_chr1;BAPLcs_chr1;BAPLcs_chr1	21228460;21229268;21230455;21230863;21231010;21240352;21240352;21244375;21244375	21228572;21229410;21230533;21231025;21231111;21240471;21240471;21244455;21244455	-;-;-;-;-;-;-;-;-	785	129	159	111	305	182	305
CSbapl.1246	BAPLcs_chr1;BAPLcs_chr1;BAPLcs_chr1	21244754;21246132;21246148	21244782;21246531;21246531	+;+;+	429	144	131	153	267	160	232
CSbapl.1248	BAPLcs_chr1;BAPLcs_chr1;BAPLcs_chr1;BAPLcs_chr1;BAPLcs_chr1;BAPLcs_chr1;BAPLcs_chr1;BAPLcs_chr1;BAPLcs_chr1;BAPLcs_chr1;BAPLcs_chr1;BAPLcs_chr1;BAPLcs_chr1;BAPLcs_chr1;BAPLcs_chr1;BAPLcs_chr1;BAPLcs_chr1;BAPLcs_chr1;BAPLcs_chr1;BAPLcs_chr1;BAPLcs_chr1;BAPLcs_chr1;BAPLcs_chr1;BAPLcs_chr1;BAPLcs_chr1;BAPLcs_chr1;BAPLcs_chr1;BAPLcs_chr1;BAPLcs_chr1;BAPLcs_chr1;BAPLcs_chr1;BAPLcs_chr1;BAPLcs_chr1;BAP…	21263225;21263225;21265659;21265659;21266598;21266598;21268177;21268177;21270418;21270418;21284192;21284192;21286856;21286856;21289725;21289725;21300423;21300423;21304825;21304825;21306549;21306549;21308596;21308596;21315095;21315095;21327199;21327199;21345880;21345880;21347444;21347444;21350408;21350408	21263350;21263350;21265688;21265688;21266712;21266712;21268239;21268239;21270535;21270535;21284352;21284352;21287032;21287032;21289774;21289774;21300512;21300512;21304949;21304949;21306627;21306627;21308721;21308721;21315341;21315341;21327336;21327336;21346044;21346044;21347584;21347584;21350580;21350580	+;+;+;+;+;+;+;+;+;+;+;+;+;+;+;+;+;+;+;+;+;+;+;+;+;+;+;+;+;+;+;+;+;+	2124	418	691	323	723	947	945
CSbapl.1250	BAPLcs_chr1;BAPLcs_chr1;BAPLcs_chr1;BAPLcs_chr1;BAPLcs_chr1;BAPLcs_chr1;BAPLcs_chr1;BAPLcs_chr1;BAPLcs_chr1;BAPLcs_chr1;BAPLcs_chr1;BAPLcs_chr1;BAPLcs_chr1;BAPLcs_chr1;BAPLcs_chr1;BAPLcs_chr1;BAPLcs_chr1;BAPLcs_chr1;BAPLcs_chr1;BAPLcs_chr1;BAPLcs_chr1;BAPLcs_chr1;BAPLcs_chr1;BAPLcs_chr1;BAPLcs_chr1;BAPLcs_chr1;BAPLcs_chr1;BAPLcs_chr1;BAPLcs_chr1;BAPLcs_chr1;BAPLcs_chr1;BAPLcs_chr1;BAPLcs_chr1;BAP…	21370062;21370062;21370062;21370062;21370062;21372673;21372673;21372673;21372673;21372673;21374523;21374523;21374523;21374523;21374523;21375067;21375067;21375067;21375067;21375067;21379801;21379801;21379801;21379801;21379801;21383572;21383572;21383572;21383572;21383572;21384971;21385044;21385044;21385044;21385044;21385044;21386702;21387181;21389716;21389716;21389716;21389716;21389716;21389716;213…	21370180;21370180;21370180;21370180;21370180;21372754;21372754;21372754;21372754;21372754;21374606;21374606;21374606;21374606;21374897;21375173;21375173;21375173;21375173;21375173;21379902;21379902;21379902;21379902;21379902;21383615;21383615;21383615;21383615;21383615;21385198;21385198;21385198;21385198;21385198;21385198;21386887;21387258;21389784;21389784;21389784;21389784;21389784;21389784;213…	+;+;+;+;+;+;+;+;+;+;+;+;+;+;+;+;+;+;+;+;+;+;+;+;+;+;+;+;+;+;+;+;+;+;+;+;+;+;+;+;+;+;+;+;+;+;+;+;+;+;+;+;+;+;+;+;+;+;+;+;+;+;+;+;+;+;+;+;+;+;+;+;+;+;+;+;+;+;+;+;+;+;+;+;+;+;+;+;+;+;+;+;+;+;+;+;+;+;+;+;+;+;+;+;+;+;+;+;+;+;+;+;+;+;+;+;+;+;+;+;+;+;+;+;+;+;+;+;+;+;+;+;+;+;+;+;+;+;+;+;+;+;+;+;+;+;+;+;+;+;+;+;+;+;+;+;+;+;+;+;+;+;+;+;+;+;+;+;+;+;+;+;+;+;+;+;+;+;+;+;+;+;+;+;+;+;+;+;+;+;+;+;+;+;+;+;+;+;+;+…	13406	1197	1607	821	13563	18034	25435
CSbapl.1252	BAPLcs_chr1;BAPLcs_chr1;BAPLcs_chr1	21410138;21410138;21448553	21410620;21410641;21448606	-;-;-	558	10	11	7	30	21	16
CSbapl.1253	BAPLcs_chr1;BAPLcs_chr1;BAPLcs_chr1;BAPLcs_chr1;BAPLcs_chr1;BAPLcs_chr1;BAPLcs_chr1;BAPLcs_chr1;BAPLcs_chr1;BAPLcs_chr1	21473033;21473206;21475965;21475965;21478505;21478505;21479597;21479597;21482511;21482511	21473279;21473341;21476181;21476181;21478603;21478603;21479787;21479787;21482584;21482584	-;-;-;-;-;-;-;-;-;-	890	168	172	136	308	280	283
CSbapl.1257	BAPLcs_chr1;BAPLcs_chr1;BAPLcs_chr1;BAPLcs_chr1;BAPLcs_chr1;BAPLcs_chr1;BAPLcs_chr1;BAPLcs_chr1;BAPLcs_chr1;BAPLcs_chr1;BAPLcs_chr1;BAPLcs_chr1;BAPLcs_chr1;BAPLcs_chr1;BAPLcs_chr1;BAPLcs_chr1	21660871;21660871;21662810;21662810;21668149;21668149;21668606;21668606;21669414;21669414;21671562;21671562;21672518;21672518;21674967;21684767	21661069;21661069;21662887;21662887;21668232;21668232;21668764;21668764;21669509;21669509;21671614;21671614;21672556;21672568;21675011;21684772	-;-;-;-;-;-;-;-;-;-;-;-;-;-;-;-	771	1042	1205	943	1525	2118	2301
CSbapl.1258	BAPLcs_chr1;BAPLcs_chr1;BAPLcs_chr1;BAPLcs_chr1;BAPLcs_chr1;BAPLcs_chr1;BAPLcs_chr1;BAPLcs_chr1;BAPLcs_chr1;BAPLcs_chr1;BAPLcs_chr1;BAPLcs_chr1;BAPLcs_chr1;BAPLcs_chr1;BAPLcs_chr1;BAPLcs_chr1;BAPLcs_chr1;BAPLcs_chr1;BAPLcs_chr1;BAPLcs_chr1;BAPLcs_chr1;BAPLcs_chr1;BAPLcs_chr1;BAPLcs_chr1;BAPLcs_chr1;BAPLcs_chr1;BAPLcs_chr1;BAPLcs_chr1	21735243;21737632;21739600;21858182;21862958;21863525;21865374;21867948;21894400;21902538;21904629;21906085;21942937;21942937;21945325;21945325;21971915;21971915;21972640;21972640;21975349;21975349;21979692;21979692;21983191;21983191;21986019;21986019	21735417;21737811;21739604;21858326;21863001;21863608;21865455;21868066;21894916;21902795;21905253;21906094;21943111;21943111;21945503;21945503;21972066;21972066;21972776;21972776;21975574;21975574;21979754;21979754;21983231;21983231;21986071;21986071	-;-;-;-;-;-;-;-;-;-;-;-;-;-;-;-;-;-;-;-;-;-;-;-;-;-;-;-	3270	7150	9046	7256	16270	17929	18865
CSbapl.1262	BAPLcs_chr1	22023512	22023943	-	432	4	3	5	59	78	68
CSbapl.1265	BAPLcs_chr1	22052481	22053419	+	939	42	38	15	14	32	38
CSbapl.1268	BAPLcs_chr1	22079370	22080608	+	1239	79	49	60	27	47	49
CSbapl.1271	BAPLcs_chr1	22142014	22143660	+	1647	16	28	2	0	15	1
CSbapl.1275	BAPLcs_chr1	22164422	22166356	-	1935	0	1	6	0	1	0
CSbapl.1277	BAPLcs_chr1;BAPLcs_chr1	22183595;22188151	22184046;22188199	+;+	501	98	213	68	3961	2869	3795
CSbapl.1279	BAPLcs_chr1	22191356	22192009	-	654	42	108	9	4	231	15
CSbapl.1284	BAPLcs_chr1;BAPLcs_chr1;BAPLcs_chr1;BAPLcs_chr1;BAPLcs_chr1;BAPLcs_chr1;BAPLcs_chr1;BAPLcs_chr1;BAPLcs_chr1;BAPLcs_chr1;BAPLcs_chr1;BAPLcs_chr1;BAPLcs_chr1;BAPLcs_chr1;BAPLcs_chr1;BAPLcs_chr1;BAPLcs_chr1;BAPLcs_chr1;BAPLcs_chr1;BAPLcs_chr1;BAPLcs_chr1;BAPLcs_chr1;BAPLcs_chr1	22239307;22240897;22243332;22248310;22249108;22249972;22252628;22274907;22275944;22277576;22291192;22294800;22295698;22297714;22303824;22304648;22305515;22308923;22309584;22311333;22316838;22317960;22319044	22239396;22241005;22243543;22248470;22249265;22250049;22252815;22274959;22276060;22277654;22291250;22294857;22295806;22297925;22303984;22304805;22305592;22309023;22309664;22311513;22317099;22318041;22319052	-;-;-;-;-;-;-;-;-;-;-;-;-;-;-;-;-;-;-;-;-;-;-	2796	10	13	29	130	124	96
CSbapl.1288	BAPLcs_chr1	22279792	22281267	+	1476	13	6	3	7	0	2
CSbapl.1292	BAPLcs_chr1;BAPLcs_chr1;BAPLcs_chr1;BAPLcs_chr1;BAPLcs_chr1;BAPLcs_chr1;BAPLcs_chr1;BAPLcs_chr1	22343349;22345254;22348726;22349388;22351559;22361583;22362735;22374033	22343679;22345331;22348826;22349468;22351673;22361844;22362816;22374383	-;-;-;-;-;-;-;-	1401	8	19	15	80	72	60
CSbapl.1297	BAPLcs_chr1;BAPLcs_chr1;BAPLcs_chr1;BAPLcs_chr1;BAPLcs_chr1;BAPLcs_chr1;BAPLcs_chr1;BAPLcs_chr1;BAPLcs_chr1	22396028;22396028;22396028;22398543;22398543;22398543;22399962;22399962;22399962	22396159;22396159;22396159;22398650;22398650;22398650;22400246;22400246;22400252	-;-;-;-;-;-;-;-;-	531	15	18	4	5	9	3
CSbapl.1298	BAPLcs_chr1;BAPLcs_chr1;BAPLcs_chr1;BAPLcs_chr1;BAPLcs_chr1;BAPLcs_chr1;BAPLcs_chr1;BAPLcs_chr1;BAPLcs_chr1	22417788;22417788;22421015;22421015;22422077;22422077;22429571;22430023;22430276	22417919;22417919;22421122;22421122;22422304;22422338;22429677;22430130;22430506	-;-;-;-;-;-;-;-;-	948	64	182	12	2	29	13
CSbapl.1301	BAPLcs_chr1;BAPLcs_chr1;BAPLcs_chr1	22441253;22441949;22442203	22441390;22442056;22442367	-;-;-	411	2	17	0	1	0	0
CSbapl.1303	BAPLcs_chr1;BAPLcs_chr1;BAPLcs_chr1;BAPLcs_chr1;BAPLcs_chr1	22448757;22448966;22449067;22449322;22449322	22448791;22449175;22449175;22449552;22449552	-;-;-;-;-	476	10	18	7	0	0	5
CSbapl.1305	BAPLcs_chr1;BAPLcs_chr1;BAPLcs_chr1;BAPLcs_chr1;BAPLcs_chr1	22461256;22461756;22463162;22464077;22467785	22461372;22461864;22463278;22464168;22468045	-;-;-;-;-	696	91	87	111	199	65	87
CSbapl.1306	BAPLcs_chr1;BAPLcs_chr1;BAPLcs_chr1;BAPLcs_chr1	22472082;22472082;22473375;22473375	22472297;22472297;22473539;22473539	+;+;+;+	381	12	18	3	392	302	297
CSbapl.1307	BAPLcs_chr1;BAPLcs_chr1;BAPLcs_chr1;BAPLcs_chr1;BAPLcs_chr1;BAPLcs_chr1;BAPLcs_chr1;BAPLcs_chr1;BAPLcs_chr1;BAPLcs_chr1;BAPLcs_chr1;BAPLcs_chr1;BAPLcs_chr1;BAPLcs_chr1;BAPLcs_chr1;BAPLcs_chr1;BAPLcs_chr1;BAPLcs_chr1;BAPLcs_chr1;BAPLcs_chr1;BAPLcs_chr1;BAPLcs_chr1;BAPLcs_chr1;BAPLcs_chr1;BAPLcs_chr1;BAPLcs_chr1;BAPLcs_chr1;BAPLcs_chr1;BAPLcs_chr1;BAPLcs_chr1	22480539;22480539;22480539;22482270;22482270;22482270;22484305;22484305;22484305;22486025;22486025;22486025;22487645;22487645;22487645;22488942;22489530;22489530;22490768;22490768;22491479;22491479;22494811;22494811;22496540;22496540;22499272;22499272;22500128;22501862	22480677;22480677;22480677;22482427;22482427;22482427;22484421;22484421;22484421;22486318;22486318;22486318;22487771;22487771;22487771;22488967;22489726;22489726;22490944;22490944;22491617;22491617;22494938;22494938;22496644;22496644;22499379;22499358;22500353;22501971	-;-;-;-;-;-;-;-;-;-;-;-;-;-;-;-;-;-;-;-;-;-;-;-;-;-;-;-;-;-	2051	104	113	82	108	107	95
CSbapl.1308	BAPLcs_chr1;BAPLcs_chr1;BAPLcs_chr1;BAPLcs_chr1;BAPLcs_chr1;BAPLcs_chr1;BAPLcs_chr1;BAPLcs_chr1;BAPLcs_chr1;BAPLcs_chr1;BAPLcs_chr1;BAPLcs_chr1;BAPLcs_chr1;BAPLcs_chr1;BAPLcs_chr1;BAPLcs_chr1;BAPLcs_chr1;BAPLcs_chr1;BAPLcs_chr1;BAPLcs_chr1;BAPLcs_chr1;BAPLcs_chr1;BAPLcs_chr1;BAPLcs_chr1;BAPLcs_chr1;BAPLcs_chr1;BAPLcs_chr1;BAPLcs_chr1;BAPLcs_chr1;BAPLcs_chr1;BAPLcs_chr1;BAPLcs_chr1;BAPLcs_chr1	22502109;22502109;22504759;22504759;22511312;22511312;22514720;22514720;22546377;22546414;22546414;22551057;22551057;22551057;22553302;22553302;22553302;22556733;22556733;22556733;22563076;22563076;22563076;22579092;22579092;22579092;22583767;22583767;22583767;22590130;22590130;22600604;22600604	22502171;22502171;22504796;22504796;22511352;22511352;22514815;22514815;22546538;22546538;22546538;22551146;22551146;22551146;22553416;22553416;22553416;22556786;22556786;22556786;22563137;22563137;22563137;22579250;22579250;22579250;22583901;22583958;22583901;22590175;22590175;22600653;22600653	+;+;+;+;+;+;+;+;+;+;+;+;+;+;+;+;+;+;+;+;+;+;+;+;+;+;+;+;+;+;+;+;+	1168	435	703	426	66	168	141
CSbapl.1311	BAPLcs_chr1;BAPLcs_chr1;BAPLcs_chr1;BAPLcs_chr1;BAPLcs_chr1;BAPLcs_chr1;BAPLcs_chr1;BAPLcs_chr1;BAPLcs_chr1;BAPLcs_chr1;BAPLcs_chr1;BAPLcs_chr1;BAPLcs_chr1;BAPLcs_chr1;BAPLcs_chr1;BAPLcs_chr1;BAPLcs_chr1;BAPLcs_chr1;BAPLcs_chr1	22644793;22645166;22645198;22646941;22646941;22647350;22647350;22647786;22647786;22648750;22648750;22649413;22649413;22650133;22650133;22651552;22651552;22652053;22652053	22644824;22646603;22646603;22647097;22647097;22647456;22647456;22647973;22647973;22648932;22648932;22649502;22649502;22650182;22650182;22651718;22651718;22652225;22652225	-;-;-;-;-;-;-;-;-;-;-;-;-;-;-;-;-;-;-	2585	480	827	183	247	333	340
CSbapl.1313	BAPLcs_chr1;BAPLcs_chr1	22652709;22654432	22654296;22654619	-;-	1776	0	0	0	2	0	0
CSbapl.1323	BAPLcs_chr1;BAPLcs_chr1	22736451;22738609	22736753;22739700	-;-	1395	0	0	0	25	11	8
CSbapl.1324	BAPLcs_chr1	22740645	22741220	-	576	0	0	0	12	4	4
CSbapl.1340	BAPLcs_chr1;BAPLcs_chr1;BAPLcs_chr1;BAPLcs_chr1;BAPLcs_chr1	22832445;22834046;22877925;22886976;22886976	22832747;22835539;22878164;22890305;22890305	-;-;-;-;-	5367	11	0	23	32	63	15
CSbapl.1350	BAPLcs_chr1;BAPLcs_chr1	22921930;22924245	22922232;22926587	-;-	2646	1	0	0	0	0	1
CSbapl.1354	BAPLcs_chr1;BAPLcs_chr1	22950736;22952335	22951038;22954677	-;-	2646	1	0	2	13	6	8
CSbapl.1358	BAPLcs_chr1;BAPLcs_chr1;BAPLcs_chr1;BAPLcs_chr1;BAPLcs_chr1;BAPLcs_chr1;BAPLcs_chr1;BAPLcs_chr1;BAPLcs_chr1;BAPLcs_chr1;BAPLcs_chr1;BAPLcs_chr1;BAPLcs_chr1;BAPLcs_chr1	23017471;23017471;23018174;23018174;23023061;23023061;23024017;23024021;23031343;23031343;23035412;23035412;23040842;23043210	23017505;23017505;23018336;23018336;23023229;23023233;23024142;23024142;23031449;23031449;23035519;23035471;23040941;23043211	-;-;-;-;-;-;-;-;-;-;-;-;-;-	814	32	56	18	245	206	177
CSbapl.1359	BAPLcs_chr1;BAPLcs_chr1;BAPLcs_chr1;BAPLcs_chr1;BAPLcs_chr1;BAPLcs_chr1;BAPLcs_chr1;BAPLcs_chr1;BAPLcs_chr1;BAPLcs_chr1;BAPLcs_chr1	23082500;23082500;23084328;23084328;23084988;23084988;23086354;23086354;23086872;23086934;23090440	23082660;23082660;23084453;23084453;23085072;23085072;23086494;23086494;23086907;23087070;23090518	-;-;-;-;-;-;-;-;-;-;-	765	103	71	55	167	100	303
CSbapl.1360	BAPLcs_chr1	23097121	23097567	+	447	0	0	0	0	3	0
CSbapl.1371	BAPLcs_chr1;BAPLcs_chr1	23231553;23236804	23232169;23237146	-;-	960	21	11	6	72	41	82
CSbapl.1373	BAPLcs_chr1;BAPLcs_chr1;BAPLcs_chr1;BAPLcs_chr1;BAPLcs_chr1;BAPLcs_chr1;BAPLcs_chr1;BAPLcs_chr1;BAPLcs_chr1;BAPLcs_chr1;BAPLcs_chr1;BAPLcs_chr1;BAPLcs_chr1	23244694;23244694;23246798;23256524;23256546;23257623;23257623;23260458;23260458;23261073;23261073;23262289;23273168	23244811;23244811;23246976;23256711;23256711;23257741;23257741;23260600;23260600;23261300;23261300;23262360;23273194	-;-;-;-;-;-;-;-;-;-;-;-;-	1074	50	72	26	21	29	28
CSbapl.1374	BAPLcs_chr1;BAPLcs_chr1;BAPLcs_chr1;BAPLcs_chr1;BAPLcs_chr1	23293532;23296483;23297577;23312292;23312893	23293717;23296670;23297695;23312434;23313117	-;-;-;-;-	861	9	11	1	8	7	3
CSbapl.1377	BAPLcs_chr1	23335258	23335692	-	435	1	1	0	2	0	1
CSbapl.1378	BAPLcs_chr1	23343190	23347290	-	4101	8	2	4	6	0	6
CSbapl.1380	BAPLcs_chr1	23353149	23353751	-	603	0	3	0	6	4	2
CSbapl.1385	BAPLcs_chr1	23376247	23377632	-	1386	32	0	0	2	1	4
CSbapl.1386	BAPLcs_chr1;BAPLcs_chr1;BAPLcs_chr1	23406514;23413501;23424419	23406827;23413558;23424469	-;-;-	423	0	0	0	0	0	1
CSbapl.1389	BAPLcs_chr1;BAPLcs_chr1;BAPLcs_chr1;BAPLcs_chr1;BAPLcs_chr1;BAPLcs_chr1;BAPLcs_chr1;BAPLcs_chr1;BAPLcs_chr1;BAPLcs_chr1;BAPLcs_chr1;BAPLcs_chr1;BAPLcs_chr1;BAPLcs_chr1;BAPLcs_chr1;BAPLcs_chr1;BAPLcs_chr1;BAPLcs_chr1	23456006;23457603;23461763;23462527;23463850;23464639;23467967;23469748;23470661;23471150;23471611;23476702;23480769;23482487;23486954;23487677;23488591;23489772	23456167;23457726;23461935;23462616;23464021;23464786;23468102;23469812;23470824;23471224;23471784;23476826;23480906;23482576;23487063;23487745;23488701;23489850	-;-;-;-;-;-;-;-;-;-;-;-;-;-;-;-;-;-	2205	237	370	100	358	573	553
CSbapl.1390	BAPLcs_chr1;BAPLcs_chr1;BAPLcs_chr1;BAPLcs_chr1;BAPLcs_chr1;BAPLcs_chr1;BAPLcs_chr1;BAPLcs_chr1;BAPLcs_chr1;BAPLcs_chr1;BAPLcs_chr1;BAPLcs_chr1;BAPLcs_chr1;BAPLcs_chr1;BAPLcs_chr1;BAPLcs_chr1;BAPLcs_chr1;BAPLcs_chr1	23500191;23500191;23500894;23500894;23501423;23501423;23502511;23502511;23503399;23503399;23506184;23506184;23507362;23507362;23508535;23508535;23509464;23509464	23500480;23500480;23500993;23500993;23501517;23501517;23502622;23502622;23503530;23503530;23506259;23506259;23507515;23507515;23508676;23508676;23509679;23509679	+;+;+;+;+;+;+;+;+;+;+;+;+;+;+;+;+;+	1317	104	156	123	126	137	174
CSbapl.1397	BAPLcs_chr1	23556483	23557511	+	1029	19	0	4	61	10	12
CSbapl.1398	BAPLcs_chr1;BAPLcs_chr1;BAPLcs_chr1;BAPLcs_chr1;BAPLcs_chr1;BAPLcs_chr1;BAPLcs_chr1;BAPLcs_chr1;BAPLcs_chr1	23580305;23581208;23589338;23594121;23597616;23599687;23600070;23610597;23612058	23580379;23581294;23589391;23594207;23597700;23599788;23600172;23610657;23612252	-;-;-;-;-;-;-;-;-	849	8	13	7	47	76	56
CSbapl.1400	BAPLcs_chr1	23616034	23616975	+	942	5	5	0	0	2	1
CSbapl.1401	BAPLcs_chr1;BAPLcs_chr1;BAPLcs_chr1;BAPLcs_chr1;BAPLcs_chr1	23625834;23626715;23628079;23629647;23633749	23625963;23626770;23628153;23629822;23633767	-;-;-;-;-	456	2	3	9	10	26	64
CSbapl.1403	BAPLcs_chr1;BAPLcs_chr1;BAPLcs_chr1;BAPLcs_chr1;BAPLcs_chr1;BAPLcs_chr1;BAPLcs_chr1;BAPLcs_chr1;BAPLcs_chr1;BAPLcs_chr1;BAPLcs_chr1;BAPLcs_chr1;BAPLcs_chr1;BAPLcs_chr1;BAPLcs_chr1;BAPLcs_chr1;BAPLcs_chr1;BAPLcs_chr1;BAPLcs_chr1;BAPLcs_chr1;BAPLcs_chr1;BAPLcs_chr1;BAPLcs_chr1;BAPLcs_chr1;BAPLcs_chr1;BAPLcs_chr1;BAPLcs_chr1;BAPLcs_chr1;BAPLcs_chr1;BAPLcs_chr1;BAPLcs_chr1;BAPLcs_chr1;BAPLcs_chr1;BAP…	23648127;23648127;23651059;23651059;23652968;23652968;23654049;23654049;23656649;23656649;23659693;23659693;23660866;23660866;23664743;23664743;23665411;23665411;23666484;23666484;23675911;23675911;23678235;23678235;23681718;23681718;23685558;23685558;23686904;23686904;23690802;23690802;23694140;23694140;23698731;23698731	23648276;23648276;23651178;23651178;23653071;23653071;23654183;23654183;23656749;23656749;23659765;23659765;23660978;23660978;23664895;23664895;23665702;23665702;23666654;23666654;23676056;23676056;23678496;23678496;23681834;23681834;23685796;23685796;23687123;23687123;23691056;23691056;23694263;23694263;23698859;23698865	-;-;-;-;-;-;-;-;-;-;-;-;-;-;-;-;-;-;-;-;-;-;-;-;-;-;-;-;-;-;-;-;-;-;-;-	2910	173	217	183	695	661	819
CSbapl.1405	BAPLcs_chr1;BAPLcs_chr1;BAPLcs_chr1;BAPLcs_chr1;BAPLcs_chr1;BAPLcs_chr1	23711126;23722020;23724356;23725723;23726399;23727459	23711165;23722092;23724447;23725775;23726456;23727496	+;+;+;+;+;+	354	3	6	0	1	8	29
CSbapl.1407	BAPLcs_chr1;BAPLcs_chr1;BAPLcs_chr1;BAPLcs_chr1;BAPLcs_chr1;BAPLcs_chr1;BAPLcs_chr1	23770205;23771899;23772701;23782136;23782988;23788196;23789058	23770478;23772123;23772876;23782356;23783309;23788804;23789198	-;-;-;-;-;-;-	1968	28	73	64	48	31	23
CSbapl.1410	BAPLcs_chr1;BAPLcs_chr1;BAPLcs_chr1;BAPLcs_chr1;BAPLcs_chr1;BAPLcs_chr1;BAPLcs_chr1;BAPLcs_chr1;BAPLcs_chr1;BAPLcs_chr1;BAPLcs_chr1;BAPLcs_chr1;BAPLcs_chr1	23784827;23784827;23793188;23793188;23793313;23795073;23795073;23795073;23796362;23796362;23796362;23797748;23799218	23784848;23784848;23793355;23793355;23793355;23795173;23795173;23795173;23796541;23796541;23796450;23797828;23799239	+;+;+;+;+;+;+;+;+;+;+;+;+	574	183	93	204	37	131	33
CSbapl.1411	BAPLcs_chr1;BAPLcs_chr1	23785334;23786295	23785914;23787456	+;+	1743	5	8	6	9	4	5
CSbapl.1413	BAPLcs_chr1;BAPLcs_chr1;BAPLcs_chr1;BAPLcs_chr1;BAPLcs_chr1;BAPLcs_chr1;BAPLcs_chr1;BAPLcs_chr1;BAPLcs_chr1;BAPLcs_chr1;BAPLcs_chr1;BAPLcs_chr1;BAPLcs_chr1;BAPLcs_chr1;BAPLcs_chr1;BAPLcs_chr1;BAPLcs_chr1;BAPLcs_chr1;BAPLcs_chr1;BAPLcs_chr1	23807504;23807504;23809177;23809177;23810410;23810410;23815065;23815065;23816007;23816007;23817408;23817408;23818143;23818143;23819149;23819149;23820112;23820112;23820851;23820851	23807602;23807602;23809293;23809293;23810490;23810490;23815190;23815190;23816201;23816201;23817477;23817477;23818259;23818259;23819228;23819228;23820190;23820190;23820969;23820960	-;-;-;-;-;-;-;-;-;-;-;-;-;-;-;-;-;-;-;-	1083	690	619	655	684	1273	1252
CSbapl.1414	BAPLcs_chr1;BAPLcs_chr1;BAPLcs_chr1;BAPLcs_chr1;BAPLcs_chr1;BAPLcs_chr1;BAPLcs_chr1;BAPLcs_chr1;BAPLcs_chr1;BAPLcs_chr1;BAPLcs_chr1;BAPLcs_chr1;BAPLcs_chr1;BAPLcs_chr1;BAPLcs_chr1;BAPLcs_chr1;BAPLcs_chr1;BAPLcs_chr1;BAPLcs_chr1	23825454;23825544;23830362;23830362;23831191;23831191;23832436;23832436;23836440;23836440;23837301;23837301;23837826;23837826;23871899;23871899;23883484;23887710;23889602	23825630;23825630;23830438;23830438;23831348;23831348;23832465;23832465;23836521;23836521;23837397;23837397;23837969;23837969;23872006;23872006;23883615;23887905;23889702	+;+;+;+;+;+;+;+;+;+;+;+;+;+;+;+;+;+;+	1302	3509	3297	2299	4461	4938	5908
CSbapl.1418	BAPLcs_chr1;BAPLcs_chr1;BAPLcs_chr1;BAPLcs_chr1;BAPLcs_chr1;BAPLcs_chr1;BAPLcs_chr1;BAPLcs_chr1;BAPLcs_chr1;BAPLcs_chr1;BAPLcs_chr1;BAPLcs_chr1;BAPLcs_chr1;BAPLcs_chr1;BAPLcs_chr1;BAPLcs_chr1;BAPLcs_chr1;BAPLcs_chr1;BAPLcs_chr1;BAPLcs_chr1;BAPLcs_chr1;BAPLcs_chr1;BAPLcs_chr1	23925129;23925129;23930981;23931038;23932803;23932803;23936888;23936888;23936888;23941463;23941463;23941463;23946291;23946291;23968503;23968503;23969566;23969566;23972628;23972628;23974431;23977203;23985983	23925302;23925302;23931247;23931247;23932832;23932832;23937013;23937013;23937013;23941566;23941504;23941566;23946350;23946350;23968670;23968670;23969658;23969658;23973750;23973750;23974496;23977375;23986073	-;-;-;-;-;-;-;-;-;-;-;-;-;-;-;-;-;-;-;-;-;-;-	2475	40	87	33	56	75	68
CSbapl.1420	BAPLcs_chr1;BAPLcs_chr1;BAPLcs_chr1;BAPLcs_chr1	23987863;23989048;23989698;23991353	23987942;23989144;23989809;23991438	-;-;-;-	375	0	4	0	0	4	5
CSbapl.1423	BAPLcs_chr1;BAPLcs_chr1	24015311;24015713	24015352;24016579	+;+	909	6	1	4	4	1	0
CSbapl.1424	BAPLcs_chr1;BAPLcs_chr1;BAPLcs_chr1;BAPLcs_chr1;BAPLcs_chr1;BAPLcs_chr1;BAPLcs_chr1;BAPLcs_chr1;BAPLcs_chr1;BAPLcs_chr1;BAPLcs_chr1;BAPLcs_chr1;BAPLcs_chr1;BAPLcs_chr1;BAPLcs_chr1;BAPLcs_chr1;BAPLcs_chr1;BAPLcs_chr1;BAPLcs_chr1;BAPLcs_chr1;BAPLcs_chr1;BAPLcs_chr1;BAPLcs_chr1;BAPLcs_chr1	24016874;24016874;24021986;24021986;24024343;24024343;24025637;24025637;24026542;24026542;24028187;24028187;24028715;24028715;24029301;24029301;24037567;24037567;24039551;24039551;24041639;24041639;24042770;24042770	24017020;24017020;24022213;24022213;24024408;24024408;24025747;24025747;24026752;24026752;24028425;24028425;24028840;24028840;24029425;24029425;24037675;24037675;24039694;24039694;24041709;24041709;24043001;24043013	-;-;-;-;-;-;-;-;-;-;-;-;-;-;-;-;-;-;-;-;-;-;-;-	1821	3	48	4	6	19	8
CSbapl.1425	BAPLcs_chr1;BAPLcs_chr1;BAPLcs_chr1;BAPLcs_chr1;BAPLcs_chr1;BAPLcs_chr1;BAPLcs_chr1	24064980;24068406;24069928;24071140;24074825;24076452;24084086	24065051;24068473;24070091;24071240;24074989;24076654;24084245	+;+;+;+;+;+;+	933	30	71	23	12	37	37
CSbapl.1426	BAPLcs_chr1;BAPLcs_chr1;BAPLcs_chr1;BAPLcs_chr1;BAPLcs_chr1;BAPLcs_chr1;BAPLcs_chr1;BAPLcs_chr1;BAPLcs_chr1;BAPLcs_chr1;BAPLcs_chr1;BAPLcs_chr1;BAPLcs_chr1	24104339;24105041;24109631;24110591;24128505;24132693;24138129;24140677;24141805;24142488;24143825;24146190;24157141	24104373;24105203;24109803;24110712;24128611;24132800;24138228;24140799;24141863;24142540;24143916;24146262;24157180	-;-;-;-;-;-;-;-;-;-;-;-;-	1248	18	25	25	291	329	178
CSbapl.1427	BAPLcs_chr1	24112624	24113088	+	465	2	15	5	7	1	2
CSbapl.1428	BAPLcs_chr1	24161165	24161653	-	489	0	3	0	2	3	0
CSbapl.1429	BAPLcs_chr1;BAPLcs_chr1;BAPLcs_chr1;BAPLcs_chr1;BAPLcs_chr1;BAPLcs_chr1;BAPLcs_chr1;BAPLcs_chr1;BAPLcs_chr1;BAPLcs_chr1;BAPLcs_chr1;BAPLcs_chr1;BAPLcs_chr1;BAPLcs_chr1;BAPLcs_chr1;BAPLcs_chr1;BAPLcs_chr1;BAPLcs_chr1;BAPLcs_chr1;BAPLcs_chr1;BAPLcs_chr1;BAPLcs_chr1;BAPLcs_chr1;BAPLcs_chr1;BAPLcs_chr1;BAPLcs_chr1;BAPLcs_chr1;BAPLcs_chr1;BAPLcs_chr1;BAPLcs_chr1;BAPLcs_chr1;BAPLcs_chr1;BAPLcs_chr1;BAP…	24169542;24169542;24174131;24174131;24177342;24177342;24181274;24181274;24182601;24182601;24186577;24186577;24189919;24189919;24190048;24190048;24192360;24192360;24201743;24201743;24202695;24202695;24203502;24203502;24207420;24207420;24208633;24208633;24211649;24211649;24214213;24214213;24215325;24215325;24217218;24217218;24220119;24220119	24169670;24169670;24174254;24174254;24177596;24177596;24181493;24181493;24182839;24182839;24186693;24186693;24190028;24190028;24190181;24190181;24192505;24192505;24201913;24201913;24202986;24202986;24203654;24203654;24207532;24207532;24208705;24208705;24211749;24211749;24214347;24214347;24215428;24215428;24217337;24217337;24220268;24220268	+;+;+;+;+;+;+;+;+;+;+;+;+;+;+;+;+;+;+;+;+;+;+;+;+;+;+;+;+;+;+;+;+;+;+;+;+;+	2886	222	246	181	596	588	537
CSbapl.1431	BAPLcs_chr1;BAPLcs_chr1;BAPLcs_chr1;BAPLcs_chr1;BAPLcs_chr1;BAPLcs_chr1;BAPLcs_chr1;BAPLcs_chr1;BAPLcs_chr1;BAPLcs_chr1;BAPLcs_chr1;BAPLcs_chr1;BAPLcs_chr1;BAPLcs_chr1;BAPLcs_chr1	24234525;24238485;24240154;24241537;24242344;24244935;24257096;24257639;24268124;24268508;24270596;24274015;24278847;24286943;24287979	24234558;24238660;24240228;24241592;24242434;24245003;24257152;24257699;24268226;24268609;24270680;24274101;24278900;24287029;24288053	+;+;+;+;+;+;+;+;+;+;+;+;+;+;+	1212	13	17	14	110	135	122
CSbapl.1433	BAPLcs_chr1	24311015	24312043	-	1029	14	0	4	50	16	19
CSbapl.1438	BAPLcs_chr1;BAPLcs_chr1;BAPLcs_chr1;BAPLcs_chr1;BAPLcs_chr1;BAPLcs_chr1;BAPLcs_chr1;BAPLcs_chr1;BAPLcs_chr1;BAPLcs_chr1;BAPLcs_chr1;BAPLcs_chr1;BAPLcs_chr1;BAPLcs_chr1;BAPLcs_chr1;BAPLcs_chr1;BAPLcs_chr1;BAPLcs_chr1;BAPLcs_chr1;BAPLcs_chr1;BAPLcs_chr1;BAPLcs_chr1;BAPLcs_chr1;BAPLcs_chr1;BAPLcs_chr1	24354413;24354413;24355414;24355414;24356583;24356583;24356709;24357840;24357840;24357840;24361967;24361967;24361967;24362876;24362876;24362876;24363981;24363981;24363981;24364505;24364505;24364505;24365018;24365018;24365018	24354628;24354628;24355555;24355555;24356724;24356724;24356737;24357915;24357915;24357915;24362098;24362098;24362098;24362987;24362987;24362987;24364075;24364075;24364075;24364604;24364604;24364604;24365307;24365307;24365307	-;-;-;-;-;-;-;-;-;-;-;-;-;-;-;-;-;-;-;-;-;-;-;-;-	1318	98	144	48	130	98	122
CSbapl.1439	BAPLcs_chr1;BAPLcs_chr1;BAPLcs_chr1;BAPLcs_chr1;BAPLcs_chr1;BAPLcs_chr1;BAPLcs_chr1;BAPLcs_chr1;BAPLcs_chr1;BAPLcs_chr1;BAPLcs_chr1;BAPLcs_chr1;BAPLcs_chr1;BAPLcs_chr1;BAPLcs_chr1;BAPLcs_chr1;BAPLcs_chr1;BAPLcs_chr1;BAPLcs_chr1;BAPLcs_chr1;BAPLcs_chr1;BAPLcs_chr1;BAPLcs_chr1;BAPLcs_chr1;BAPLcs_chr1;BAPLcs_chr1;BAPLcs_chr1;BAPLcs_chr1;BAPLcs_chr1;BAPLcs_chr1;BAPLcs_chr1;BAPLcs_chr1;BAPLcs_chr1;BAP…	24374273;24376169;24376315;24377462;24377462;24378417;24378417;24379089;24379089;24383566;24383566;24385236;24385236;24389393;24389393;24392904;24392904;24393464;24393464;24393864;24393864;24394876;24394876;24396588;24396588;24399418;24399418;24400183;24400183;24401896;24401896;24402577;24402577;24405595;24405595;24407154;24407154	24374309;24376393;24376393;24377572;24377572;24378485;24378485;24379198;24379198;24383655;24383655;24385373;24385373;24389517;24389517;24393077;24393077;24393538;24393538;24394027;24394027;24394940;24394940;24396723;24396723;24399565;24399565;24400354;24400354;24401985;24401985;24402749;24402749;24405718;24405718;24407315;24407315	+;+;+;+;+;+;+;+;+;+;+;+;+;+;+;+;+;+;+;+;+;+;+;+;+;+;+;+;+;+;+;+;+;+;+;+;+	2388	277	366	142	427	587	616
CSbapl.1442	BAPLcs_chr1;BAPLcs_chr1	24420860;24422557	24421206;24422860	-;-	651	0	0	2	6	2	4
CSbapl.1444	BAPLcs_chr1;BAPLcs_chr1;BAPLcs_chr1;BAPLcs_chr1	24443860;24444003;24455007;24462314	24443896;24444187;24455064;24462627	+;+;+;+	594	0	0	0	0	1	2
CSbapl.1450	BAPLcs_chr1;BAPLcs_chr1	24496382;24496382	24497101;24497101	+;+	720	14	55	3	0	6	8
CSbapl.1453	BAPLcs_chr1	24517061	24517555	+	495	2	4	2	0	2	0
CSbapl.1454	BAPLcs_chr1;BAPLcs_chr1;BAPLcs_chr1	24520937;24521392;24521957	24521125;24521514;24522181	-;-;-	537	0	0	0	2	1	1
CSbapl.1456	BAPLcs_chr1;BAPLcs_chr1	24530682;24530682	24531140;24531140	+;+	459	2	0	0	1	1	1
CSbapl.1458	BAPLcs_chr1;BAPLcs_chr1;BAPLcs_chr1;BAPLcs_chr1;BAPLcs_chr1	24544320;24546112;24548138;24550257;24550965	24544593;24546336;24548313;24550477;24551355	-;-;-;-;-	1287	21	29	34	46	39	12
CSbapl.1459	BAPLcs_chr1;BAPLcs_chr1;BAPLcs_chr1;BAPLcs_chr1;BAPLcs_chr1;BAPLcs_chr1;BAPLcs_chr1;BAPLcs_chr1;BAPLcs_chr1;BAPLcs_chr1;BAPLcs_chr1;BAPLcs_chr1;BAPLcs_chr1;BAPLcs_chr1;BAPLcs_chr1;BAPLcs_chr1;BAPLcs_chr1;BAPLcs_chr1	24552803;24552803;24559417;24559417;24561085;24561085;24561085;24561085;24562968;24562968;24562968;24562968;24564315;24564315;24564315;24564315;24565671;24568087	24552824;24552824;24559501;24559501;24561252;24561252;24561252;24561252;24563068;24563068;24563068;24563068;24564449;24564449;24564403;24564449;24565751;24568108	+;+;+;+;+;+;+;+;+;+;+;+;+;+;+;+;+;+	614	497	494	432	128	207	311
CSbapl.1460	BAPLcs_chr1;BAPLcs_chr1	24555457;24557021	24556779;24557161	-;-	1464	12	21	6	12	10	9
CSbapl.1461	BAPLcs_chr1;BAPLcs_chr1;BAPLcs_chr1;BAPLcs_chr1;BAPLcs_chr1;BAPLcs_chr1;BAPLcs_chr1;BAPLcs_chr1;BAPLcs_chr1;BAPLcs_chr1;BAPLcs_chr1;BAPLcs_chr1;BAPLcs_chr1;BAPLcs_chr1;BAPLcs_chr1;BAPLcs_chr1;BAPLcs_chr1;BAPLcs_chr1;BAPLcs_chr1;BAPLcs_chr1	24575142;24575142;24576833;24576833;24577889;24577889;24580759;24580759;24581701;24581701;24583703;24583703;24584441;24584441;24585451;24585451;24586416;24586416;24587155;24587155	24575240;24575240;24576949;24576949;24577969;24577969;24580884;24580884;24581895;24581895;24583772;24583772;24584557;24584557;24585530;24585530;24586494;24586494;24587273;24587264	-;-;-;-;-;-;-;-;-;-;-;-;-;-;-;-;-;-;-;-	1083	376	386	416	595	667	1041
CSbapl.1462	BAPLcs_chr1;BAPLcs_chr1;BAPLcs_chr1;BAPLcs_chr1;BAPLcs_chr1;BAPLcs_chr1;BAPLcs_chr1;BAPLcs_chr1;BAPLcs_chr1;BAPLcs_chr1;BAPLcs_chr1;BAPLcs_chr1;BAPLcs_chr1;BAPLcs_chr1;BAPLcs_chr1;BAPLcs_chr1;BAPLcs_chr1;BAPLcs_chr1;BAPLcs_chr1	24595566;24595566;24600927;24600927;24601760;24601760;24603004;24603004;24608294;24608294;24609156;24609156;24609685;24609685;24644189;24644189;24654165;24657738;24659624	24595718;24595718;24601003;24601003;24601917;24601917;24603033;24603033;24608375;24608375;24609252;24609252;24609828;24609828;24644296;24644296;24654296;24657933;24659724	+;+;+;+;+;+;+;+;+;+;+;+;+;+;+;+;+;+;+	1278	3227	2784	3560	8616	6542	6841
CSbapl.1465	BAPLcs_chr1;BAPLcs_chr1;BAPLcs_chr1;BAPLcs_chr1;BAPLcs_chr1;BAPLcs_chr1;BAPLcs_chr1;BAPLcs_chr1;BAPLcs_chr1;BAPLcs_chr1;BAPLcs_chr1;BAPLcs_chr1;BAPLcs_chr1;BAPLcs_chr1;BAPLcs_chr1;BAPLcs_chr1;BAPLcs_chr1;BAPLcs_chr1;BAPLcs_chr1;BAPLcs_chr1;BAPLcs_chr1;BAPLcs_chr1;BAPLcs_chr1;BAPLcs_chr1;BAPLcs_chr1;BAPLcs_chr1;BAPLcs_chr1;BAPLcs_chr1;BAPLcs_chr1;BAPLcs_chr1;BAPLcs_chr1;BAPLcs_chr1;BAPLcs_chr1	24716632;24716632;24722363;24722363;24724246;24724246;24726650;24726650;24730845;24730845;24735600;24735600;24738476;24754727;24755669;24758366;24760174;24763083;24787952;24791033;24792364;24801067;24811964;24814315;24815608;24816540;24818122;24818650;24819236;24828500;24830353;24832424;24833363	24716805;24716805;24722689;24722689;24724275;24724275;24726775;24726775;24730948;24730948;24735659;24735633;24738893;24754773;24755761;24759494;24760239;24763255;24788069;24791138;24792511;24801181;24812191;24814380;24815718;24816756;24818360;24818775;24819360;24828608;24830496;24832494;24833594	-;-;-;-;-;-;-;-;-;-;-;-;-;-;-;-;-;-;-;-;-;-;-;-;-;-;-;-;-;-;-;-;-	4902	67	194	95	90	127	103
CSbapl.1467	BAPLcs_chr1	24725205	24725618	+	414	2	3	1	1	0	0
CSbapl.1472	BAPLcs_chr1;BAPLcs_chr1;BAPLcs_chr1;BAPLcs_chr1;BAPLcs_chr1;BAPLcs_chr1;BAPLcs_chr1	24850509;24852640;24859176;24860388;24863250;24864865;24873404	24850580;24852707;24859339;24860488;24863414;24865067;24873563	+;+;+;+;+;+;+	933	51	63	44	10	55	39
CSbapl.1473	BAPLcs_chr1;BAPLcs_chr1;BAPLcs_chr1;BAPLcs_chr1;BAPLcs_chr1;BAPLcs_chr1;BAPLcs_chr1;BAPLcs_chr1;BAPLcs_chr1	24902091;24926317;24926323;24926323;24926323;24938221;24938221;24938221;24938221	24902444;24926455;24926455;24926455;24926455;24938480;24938480;24938480;24938480	+;+;+;+;+;+;+;+;+	753	514	1108	318	246	308	436
CSbapl.1476	BAPLcs_chr1;BAPLcs_chr1;BAPLcs_chr1;BAPLcs_chr1	24978388;24978388;24980784;24980784	24978590;24978590;24980913;24980913	-;-;-;-	333	190	568	143	42	152	559
CSbapl.1480	BAPLcs_chr1;BAPLcs_chr1;BAPLcs_chr1;BAPLcs_chr1;BAPLcs_chr1;BAPLcs_chr1;BAPLcs_chr1;BAPLcs_chr1;BAPLcs_chr1;BAPLcs_chr1;BAPLcs_chr1;BAPLcs_chr1;BAPLcs_chr1;BAPLcs_chr1;BAPLcs_chr1;BAPLcs_chr1;BAPLcs_chr1	25010545;25011832;25014164;25016023;25017656;25018990;25035356;25047334;25096777;25099099;25100192;25102210;25104810;25106153;25124817;25131377;25226075	25010604;25012009;25014427;25016159;25017800;25019253;25035544;25047522;25096904;25099276;25100455;25102346;25104954;25106416;25125005;25131565;25227351	+;+;+;+;+;+;+;+;+;+;+;+;+;+;+;+;+	4197	15	34	6	0	9	9
CSbapl.1504	BAPLcs_chr1	25248438	25249439	+	1002	0	2	0	0	0	0
CSbapl.1506	BAPLcs_chr1	25252091	25252522	+	432	2	0	0	0	0	0
CSbapl.1509	BAPLcs_chr1;BAPLcs_chr1;BAPLcs_chr1;BAPLcs_chr1;BAPLcs_chr1;BAPLcs_chr1;BAPLcs_chr1;BAPLcs_chr1;BAPLcs_chr1;BAPLcs_chr1;BAPLcs_chr1;BAPLcs_chr1;BAPLcs_chr1;BAPLcs_chr1;BAPLcs_chr1;BAPLcs_chr1;BAPLcs_chr1;BAPLcs_chr1;BAPLcs_chr1	25275977;25275977;25276901;25276901;25277652;25277652;25278876;25278876;25279800;25279800;25280600;25280600;25281802;25281802;25282442;25282442;25283124;25283124;25283998	25276171;25276171;25277053;25277053;25277794;25277794;25279016;25279016;25279948;25279948;25280683;25280683;25281946;25281946;25282548;25282548;25283320;25283242;25284012	+;+;+;+;+;+;+;+;+;+;+;+;+;+;+;+;+;+;+	1329	313	349	92	262	372	630
CSbapl.1510	BAPLcs_chr1;BAPLcs_chr1;BAPLcs_chr1;BAPLcs_chr1;BAPLcs_chr1;BAPLcs_chr1;BAPLcs_chr1;BAPLcs_chr1;BAPLcs_chr1;BAPLcs_chr1;BAPLcs_chr1;BAPLcs_chr1;BAPLcs_chr1;BAPLcs_chr1;BAPLcs_chr1;BAPLcs_chr1;BAPLcs_chr1;BAPLcs_chr1;BAPLcs_chr1;BAPLcs_chr1;BAPLcs_chr1	25291406;25292896;25292910;25293947;25293947;25297217;25297217;25298857;25298857;25301026;25301026;25302547;25302547;25303032;25303032;25303685;25303685;25304614;25304614;25306344;25306344	25291560;25293055;25293055;25294079;25294079;25297337;25297337;25299082;25299082;25301207;25301207;25302690;25302690;25303106;25303106;25303809;25303809;25304721;25304721;25306431;25306431	-;-;-;-;-;-;-;-;-;-;-;-;-;-;-;-;-;-;-;-;-	1517	376	608	188	387	418	502
CSbapl.1511	BAPLcs_chr1;BAPLcs_chr1;BAPLcs_chr1;BAPLcs_chr1;BAPLcs_chr1;BAPLcs_chr1;BAPLcs_chr1;BAPLcs_chr1;BAPLcs_chr1;BAPLcs_chr1;BAPLcs_chr1;BAPLcs_chr1;BAPLcs_chr1;BAPLcs_chr1;BAPLcs_chr1;BAPLcs_chr1;BAPLcs_chr1;BAPLcs_chr1;BAPLcs_chr1;BAPLcs_chr1;BAPLcs_chr1;BAPLcs_chr1;BAPLcs_chr1;BAPLcs_chr1;BAPLcs_chr1;BAPLcs_chr1;BAPLcs_chr1;BAPLcs_chr1;BAPLcs_chr1;BAPLcs_chr1;BAPLcs_chr1;BAPLcs_chr1;BAPLcs_chr1;BAP…	25309770;25309770;25310739;25310739;25311813;25311813;25312803;25312803;25313557;25313557;25315436;25315436;25317231;25317231;25318216;25318216;25320623;25320623;25321241;25321241;25322768;25322768;25323396;25323396;25326758;25326758;25328454;25328454;25331900;25331900;25332236;25332236;25333827;25333827;25334767;25334767;25336166;25336166;25336546;25336546;25338316;25338316;25339000;25339000	25310006;25310006;25310810;25310810;25311878;25311878;25312940;25312940;25313760;25313760;25315516;25315516;25317446;25317446;25318323;25318323;25320718;25320718;25321309;25321309;25322846;25322846;25323456;25323456;25326896;25326896;25328531;25328531;25331999;25331999;25332482;25332482;25334060;25334060;25334899;25334899;25336255;25336255;25336616;25336616;25338404;25338404;25339106;25339106	+;+;+;+;+;+;+;+;+;+;+;+;+;+;+;+;+;+;+;+;+;+;+;+;+;+;+;+;+;+;+;+;+;+;+;+;+;+;+;+;+;+;+;+	2715	78	157	81	217	233	311
CSbapl.1512	BAPLcs_chr1;BAPLcs_chr1;BAPLcs_chr1	25349345;25350109;25350974	25349414;25350317;25351207	+;+;+	513	61	169	11	6	209	43
CSbapl.1515	BAPLcs_chr1;BAPLcs_chr1;BAPLcs_chr1	25365107;25367663;25368314	25365244;25367751;25368500	+;+;+	414	971	922	916	128	331	155
CSbapl.1524	BAPLcs_chr1	25454838	25455299	+	462	0	0	1	4	0	0
CSbapl.1526	BAPLcs_chr1;BAPLcs_chr1;BAPLcs_chr1;BAPLcs_chr1	25470261;25471611;25473406;25491781	25470631;25471922;25473684;25491847	-;-;-;-	1029	7	6	0	9	0	0
CSbapl.1538	BAPLcs_chr1	25539678	25540238	+	561	0	0	0	4	0	2
CSbapl.1554	BAPLcs_chr1	25615080	25615742	-	663	2	2	2	2	1	3
CSbapl.1566	BAPLcs_chr1	25685464	25686516	-	1053	2	0	1	2	2	0
CSbapl.1574	BAPLcs_chr1;BAPLcs_chr1;BAPLcs_chr1;BAPLcs_chr1;BAPLcs_chr1;BAPLcs_chr1;BAPLcs_chr1;BAPLcs_chr1;BAPLcs_chr1;BAPLcs_chr1;BAPLcs_chr1;BAPLcs_chr1;BAPLcs_chr1;BAPLcs_chr1;BAPLcs_chr1;BAPLcs_chr1	25730018;25730018;25731330;25731330;25732875;25732875;25735735;25735735;25738493;25738493;25739362;25739362;25742947;25742947;25743385;25743385	25730060;25730060;25731431;25731431;25733051;25733051;25736174;25736174;25738670;25738670;25739433;25739433;25743057;25743057;25743506;25743506	+;+;+;+;+;+;+;+;+;+;+;+;+;+;+;+	1245	0	0	0	0	1	0
CSbapl.1576	BAPLcs_chr1;BAPLcs_chr1;BAPLcs_chr1;BAPLcs_chr1;BAPLcs_chr1;BAPLcs_chr1;BAPLcs_chr1;BAPLcs_chr1;BAPLcs_chr1;BAPLcs_chr1;BAPLcs_chr1	25750043;25756722;25763375;25765608;25768556;25769879;25776331;25779293;25782168;25785186;25787558	25750100;25756841;25763814;25765785;25768675;25769983;25776459;25779478;25782607;25785339;25787904	+;+;+;+;+;+;+;+;+;+;+	2277	28	55	23	12	25	35
CSbapl.1579	BAPLcs_chr1	25759039	25759677	-	639	0	2	0	3	1	1
CSbapl.1583	BAPLcs_chr1;BAPLcs_chr1;BAPLcs_chr1;BAPLcs_chr1;BAPLcs_chr1;BAPLcs_chr1	25803881;25805867;25806441;25809612;25813078;25814716	25804539;25805988;25806504;25809732;25813188;25814850	-;-;-;-;-;-	1212	249	249	257	45	43	67
CSbapl.1592	BAPLcs_chr1	25837409	25837984	-	576	4	0	0	3	2	0
CSbapl.1593	BAPLcs_chr1;BAPLcs_chr1;BAPLcs_chr1;BAPLcs_chr1;BAPLcs_chr1;BAPLcs_chr1;BAPLcs_chr1;BAPLcs_chr1;BAPLcs_chr1;BAPLcs_chr1	25846186;25847386;25849477;25850490;25851818;25852835;25854096;25855816;25856962;25859455	25846410;25847575;25849605;25850611;25851985;25852985;25854256;25855990;25857187;25859626	+;+;+;+;+;+;+;+;+;+	1719	2	0	0	2	0	0
CSbapl.1596	BAPLcs_chr1;BAPLcs_chr1;BAPLcs_chr1;BAPLcs_chr1	25867847;25870584;25874369;25909088	25868223;25870895;25874516;25909114	-;-;-;-	864	2	10	3	1	0	3
CSbapl.1608	BAPLcs_chr1;BAPLcs_chr1;BAPLcs_chr1;BAPLcs_chr1;BAPLcs_chr1	25949508;25950629;25951763;25958453;25967993	25949656;25950720;25953287;25958568;25968258	-;-;-;-;-	2148	0	0	0	2	0	0
CSbapl.1612	BAPLcs_chr1;BAPLcs_chr1;BAPLcs_chr1;BAPLcs_chr1;BAPLcs_chr1;BAPLcs_chr1;BAPLcs_chr1;BAPLcs_chr1;BAPLcs_chr1	25976331;25977452;25978442;25985727;25986395;25992360;25994333;25997503;26005981	25976443;25977543;25979966;25985783;25986548;25992541;25994442;25997667;26006111	-;-;-;-;-;-;-;-;-	2529	7	28	0	0	6	6
CSbapl.1616	BAPLcs_chr1;BAPLcs_chr1;BAPLcs_chr1;BAPLcs_chr1;BAPLcs_chr1;BAPLcs_chr1;BAPLcs_chr1;BAPLcs_chr1;BAPLcs_chr1;BAPLcs_chr1;BAPLcs_chr1	26033203;26033203;26035030;26035030;26035690;26035690;26037056;26037056;26037574;26037636;26041147	26033363;26033363;26035155;26035155;26035774;26035774;26037196;26037196;26037609;26037772;26041225	-;-;-;-;-;-;-;-;-;-;-	765	99	161	118	223	259	142
CSbapl.1617	BAPLcs_chr1;BAPLcs_chr1	26047641;26051659	26048545;26051983	+;+	1230	10	2	0	18	12	5
CSbapl.1618	BAPLcs_chr1	26049197	26050003	-	807	0	0	0	0	1	0
CSbapl.1620	BAPLcs_chr1;BAPLcs_chr1;BAPLcs_chr1;BAPLcs_chr1;BAPLcs_chr1;BAPLcs_chr1	26066230;26067237;26068997;26071697;26073056;26075116	26066406;26067431;26069108;26071875;26073137;26075402	+;+;+;+;+;+	1032	6	10	2	2	1	2
CSbapl.1623	BAPLcs_chr1;BAPLcs_chr1;BAPLcs_chr1;BAPLcs_chr1;BAPLcs_chr1;BAPLcs_chr1;BAPLcs_chr1;BAPLcs_chr1;BAPLcs_chr1;BAPLcs_chr1;BAPLcs_chr1;BAPLcs_chr1	26079623;26084114;26085606;26086244;26087211;26087899;26096345;26098271;26099657;26100461;26101411;26104093	26079668;26084304;26085800;26086355;26087389;26087980;26096535;26098369;26099768;26100639;26101492;26104376	+;+;+;+;+;+;+;+;+;+;+;+	1752	3	28	4	52	96	119
CSbapl.1624	BAPLcs_chr1;BAPLcs_chr1;BAPLcs_chr1;BAPLcs_chr1;BAPLcs_chr1;BAPLcs_chr1;BAPLcs_chr1;BAPLcs_chr1;BAPLcs_chr1;BAPLcs_chr1	26113352;26113352;26121577;26121577;26122347;26122347;26125236;26125236;26126656;26126656	26113417;26113417;26121628;26121628;26122412;26122412;26125372;26125372;26126823;26126823	+;+;+;+;+;+;+;+;+;+	489	14	8	31	2	4	23
CSbapl.1626	BAPLcs_chr1;BAPLcs_chr1;BAPLcs_chr1	26131663;26133266;26136934	26132051;26133353;26137476	-;-;-	1020	10	34	8	16	8	10
CSbapl.1630	BAPLcs_chr1;BAPLcs_chr1;BAPLcs_chr1;BAPLcs_chr1;BAPLcs_chr1;BAPLcs_chr1;BAPLcs_chr1;BAPLcs_chr1;BAPLcs_chr1;BAPLcs_chr1;BAPLcs_chr1;BAPLcs_chr1;BAPLcs_chr1;BAPLcs_chr1;BAPLcs_chr1;BAPLcs_chr1;BAPLcs_chr1;BAPLcs_chr1;BAPLcs_chr1;BAPLcs_chr1;BAPLcs_chr1	26158625;26188488;26191027;26198286;26202778;26207451;26209547;26212027;26255223;26256269;26258484;26260556;26318963;26321151;26323662;26328947;26330049;26332115;26334211;26336658;26336658	26159086;26188634;26191185;26198351;26202871;26207783;26209852;26212259;26255259;26256298;26258816;26260861;26319094;26321219;26323763;26329040;26330152;26332313;26334516;26336737;26336737	+;+;+;+;+;+;+;+;+;+;+;+;+;+;+;+;+;+;+;+;+	3592	19	174	17	1	24	17
CSbapl.1633	BAPLcs_chr1;BAPLcs_chr1	26267951;26344251	26268565;26345162	-;-	1527	0	0	0	2	0	0
CSbapl.1640	BAPLcs_chr1;BAPLcs_chr1;BAPLcs_chr1;BAPLcs_chr1;BAPLcs_chr1	26350585;26351939;26352627;26354760;26358576	26350814;26351989;26353430;26354906;26358789	-;-;-;-;-	1446	22	49	5	10	45	19
CSbapl.1643	BAPLcs_chr1;BAPLcs_chr1;BAPLcs_chr1	26389656;26391798;26392537	26390203;26391906;26392830	-;-;-	951	0	0	3	4	4	0
CSbapl.1644	BAPLcs_chr1;BAPLcs_chr1	26393108;26402737	26394661;26403096	-;-	1914	0	0	0	10	0	4
CSbapl.1645	BAPLcs_chr1	26394777	26395496	-	720	0	0	4	0	2	0
CSbapl.1648	BAPLcs_chr1;BAPLcs_chr1;BAPLcs_chr1;BAPLcs_chr1;BAPLcs_chr1;BAPLcs_chr1;BAPLcs_chr1;BAPLcs_chr1;BAPLcs_chr1;BAPLcs_chr1;BAPLcs_chr1;BAPLcs_chr1	26416759;26416759;26416759;26420095;26420095;26420095;26421660;26421660;26421660;26424984;26424984;26424984	26416946;26416946;26416946;26420161;26420161;26420161;26421886;26421886;26421886;26425152;26425152;26425152	-;-;-;-;-;-;-;-;-;-;-;-	651	18	20	24	61	23	52
CSbapl.1652	BAPLcs_chr1;BAPLcs_chr1;BAPLcs_chr1;BAPLcs_chr1;BAPLcs_chr1;BAPLcs_chr1;BAPLcs_chr1;BAPLcs_chr1;BAPLcs_chr1;BAPLcs_chr1;BAPLcs_chr1;BAPLcs_chr1;BAPLcs_chr1;BAPLcs_chr1;BAPLcs_chr1;BAPLcs_chr1;BAPLcs_chr1;BAPLcs_chr1	26451814;26453419;26454888;26454890;26457653;26464730;26481476;26516915;26524569;26524569;26526040;26526040;26529065;26529065;26529065;26535771;26535771;26535771	26452004;26454603;26455036;26455036;26457796;26464781;26481666;26517105;26525753;26525753;26526186;26526186;26529208;26529208;26529208;26535822;26535822;26535822	-;-;-;-;-;-;-;-;-;-;-;-;-;-;-;-;-;-	3631	1	13	8	16	9	10
CSbapl.1656	BAPLcs_chr1;BAPLcs_chr1;BAPLcs_chr1;BAPLcs_chr1;BAPLcs_chr1;BAPLcs_chr1;BAPLcs_chr1;BAPLcs_chr1;BAPLcs_chr1;BAPLcs_chr1;BAPLcs_chr1;BAPLcs_chr1;BAPLcs_chr1	26549422;26549422;26551969;26551969;26553440;26553440;26556525;26556525;26562245;26576806;26578265;26581355;26592193	26549612;26549612;26553153;26553153;26553586;26553586;26556668;26556668;26562296;26577978;26578411;26581498;26592244	-;-;-;-;-;-;-;-;-;-;-;-;-	3235	3	5	1	20	17	35
CSbapl.1663	BAPLcs_chr1	26644104	26645126	-	1023	0	1	3	1	4	2
CSbapl.1664	BAPLcs_chr1;BAPLcs_chr1;BAPLcs_chr1;BAPLcs_chr1;BAPLcs_chr1;BAPLcs_chr1;BAPLcs_chr1;BAPLcs_chr1;BAPLcs_chr1;BAPLcs_chr1;BAPLcs_chr1;BAPLcs_chr1;BAPLcs_chr1;BAPLcs_chr1;BAPLcs_chr1;BAPLcs_chr1	26673006;26712914;26712923;26712923;26713645;26713645;26713645;26714212;26714212;26714212;26715586;26715586;26715586;26719064;26719064;26719064	26673059;26713063;26713063;26713063;26713828;26713828;26713828;26714350;26714350;26714350;26715752;26715752;26715752;26719299;26719299;26719299	+;+;+;+;+;+;+;+;+;+;+;+;+;+;+;+	930	23	36	16	82	77	73
CSbapl.1666	BAPLcs_chr1;BAPLcs_chr1;BAPLcs_chr1;BAPLcs_chr1;BAPLcs_chr1;BAPLcs_chr1;BAPLcs_chr1;BAPLcs_chr1;BAPLcs_chr1;BAPLcs_chr1;BAPLcs_chr1;BAPLcs_chr1;BAPLcs_chr1;BAPLcs_chr1;BAPLcs_chr1;BAPLcs_chr1;BAPLcs_chr1;BAPLcs_chr1;BAPLcs_chr1;BAPLcs_chr1;BAPLcs_chr1;BAPLcs_chr1;BAPLcs_chr1;BAPLcs_chr1;BAPLcs_chr1;BAPLcs_chr1;BAPLcs_chr1;BAPLcs_chr1;BAPLcs_chr1;BAPLcs_chr1;BAPLcs_chr1;BAPLcs_chr1;BAPLcs_chr1;BAP…	26756969;26756969;26766616;26766616;26767211;26767211;26767335;26767335;26767453;26767453;26767453;26767525;26767525;26772021;26772021;26772021;26772021;26772021;26772021;26772021;26772657;26772657;26772657;26772657;26772657;26772657;26772657;26774365;26774365;26774365;26774365;26774365;26774365;26774365;26776037;26776037;26776037;26776037;26776037;26776037;26776037;26778150;26778150;26778150;267…	26757137;26757137;26766698;26766698;26767365;26767365;26767400;26767400;26767601;26767601;26767601;26767601;26767601;26772142;26772142;26772142;26772142;26772142;26772142;26772142;26772747;26772747;26772747;26772747;26772747;26772747;26772747;26774521;26774521;26774521;26774521;26774521;26774521;26774521;26776200;26776200;26776200;26776200;26776200;26776200;26776200;26778231;26778231;26778231;267…	+;+;+;+;+;+;+;+;+;+;+;+;+;+;+;+;+;+;+;+;+;+;+;+;+;+;+;+;+;+;+;+;+;+;+;+;+;+;+;+;+;+;+;+;+;+;+;+;+;+;+;+;+;+;+;+;+;+;+;+;+;+;+;+;+;+;+;+;+;+;+;+;+;+;+;+;+;+;+;+;+;+;+;+;+;+;+;+;+;+;+;+	3047	653	861	562	231	312	312
CSbapl.1667	BAPLcs_chr1;BAPLcs_chr1;BAPLcs_chr1;BAPLcs_chr1;BAPLcs_chr1;BAPLcs_chr1	26814880;26821392;26821392;26823409;26823409;26823409	26815122;26821415;26821415;26823774;26823774;26823774	-;-;-;-;-;-	633	16	19	0	0	4	7
CSbapl.1674	BAPLcs_chr1;BAPLcs_chr1;BAPLcs_chr1	26856657;26859322;26859343	26856677;26859705;26859705	-;-;-	405	7	3	1	0	7	7
CSbapl.1675	BAPLcs_chr1;BAPLcs_chr1	26866795;26866795	26867394;26867394	-;-	600	34	115	17	18	24	17
CSbapl.1676	BAPLcs_chr1;BAPLcs_chr1	26875284;26875284	26875748;26875748	+;+	465	365	821	120	214	126	249
CSbapl.1677	BAPLcs_chr1;BAPLcs_chr1;BAPLcs_chr1;BAPLcs_chr1	26882453;26884656;26888390;26889695	26882500;26884791;26888519;26889857	+;+;+;+	477	25	73	34	33	20	34
CSbapl.1681	BAPLcs_chr1;BAPLcs_chr1;BAPLcs_chr1;BAPLcs_chr1;BAPLcs_chr1;BAPLcs_chr1;BAPLcs_chr1;BAPLcs_chr1;BAPLcs_chr1;BAPLcs_chr1	26902029;26903506;26903506;26904558;26904558;26920425;26920425;26921050;26921050;26938113	26902502;26904053;26904053;26904671;26904671;26920615;26920615;26921233;26921231;26938149	-;-;-;-;-;-;-;-;-;-	1548	80	86	2	4	9	12
CSbapl.1687	BAPLcs_chr1;BAPLcs_chr1;BAPLcs_chr1;BAPLcs_chr1;BAPLcs_chr1;BAPLcs_chr1;BAPLcs_chr1;BAPLcs_chr1;BAPLcs_chr1;BAPLcs_chr1;BAPLcs_chr1;BAPLcs_chr1	26995334;26995334;26995334;26996889;26996889;26996889;27002608;27002608;27002608;27003788;27003788;27003788	26995977;26995977;26995977;26997006;26997006;26997006;27002758;27002758;27002758;27004131;27004131;27004131	+;+;+;+;+;+;+;+;+;+;+;+	1257	14	131	1	13	6	6
CSbapl.1692	BAPLcs_chr1;BAPLcs_chr1;BAPLcs_chr1;BAPLcs_chr1	27047415;27050055;27051926;27053809	27048130;27050172;27052076;27054152	+;+;+;+	1329	2	13	2	2	1	0
CSbapl.1694	BAPLcs_chr1;BAPLcs_chr1	27063084;27064914	27063528;27065035	+;+	567	0	0	0	6	0	0
CSbapl.1695	BAPLcs_chr1;BAPLcs_chr1	27074494;27077615	27074920;27077700	+;+	513	0	1	0	4	0	0
CSbapl.1697	BAPLcs_chr1;BAPLcs_chr1;BAPLcs_chr1	27087606;27088989;27091802	27087785;27089364;27092943	+;+;+	1698	0	0	0	2	4	10
CSbapl.1701	BAPLcs_chr1;BAPLcs_chr1;BAPLcs_chr1;BAPLcs_chr1;BAPLcs_chr1;BAPLcs_chr1;BAPLcs_chr1;BAPLcs_chr1;BAPLcs_chr1;BAPLcs_chr1	27109357;27109357;27110495;27110495;27110872;27110872;27112044;27112044;27113016;27113016	27109418;27109418;27110656;27110656;27111042;27111042;27112232;27112232;27113067;27113064	-;-;-;-;-;-;-;-;-;-	636	462	433	90	68	126	219
CSbapl.1703	BAPLcs_chr1;BAPLcs_chr1;BAPLcs_chr1;BAPLcs_chr1;BAPLcs_chr1;BAPLcs_chr1;BAPLcs_chr1;BAPLcs_chr1	27124930;27126060;27126647;27127537;27128445;27129223;27129694;27132182	27124988;27126218;27126817;27127719;27128591;27129393;27129891;27132230	-;-;-;-;-;-;-;-	1137	131	103	127	66	75	98
CSbapl.1705	BAPLcs_chr1;BAPLcs_chr1;BAPLcs_chr1;BAPLcs_chr1;BAPLcs_chr1;BAPLcs_chr1;BAPLcs_chr1;BAPLcs_chr1;BAPLcs_chr1;BAPLcs_chr1;BAPLcs_chr1;BAPLcs_chr1;BAPLcs_chr1;BAPLcs_chr1;BAPLcs_chr1;BAPLcs_chr1;BAPLcs_chr1;BAPLcs_chr1;BAPLcs_chr1;BAPLcs_chr1;BAPLcs_chr1;BAPLcs_chr1;BAPLcs_chr1;BAPLcs_chr1	27157597;27157597;27158894;27158894;27159540;27159540;27161901;27161901;27163336;27163336;27164841;27164841;27165986;27165986;27166967;27166967;27167900;27167900;27173696;27173696;27175815;27175815;27177584;27177584	27157741;27157741;27159033;27159033;27160473;27160473;27162135;27162135;27163453;27163453;27164932;27164932;27166049;27166049;27167164;27167164;27168033;27168033;27173797;27173797;27175855;27175855;27177963;27177963	+;+;+;+;+;+;+;+;+;+;+;+;+;+;+;+;+;+;+;+;+;+;+;+	2583	250	215	291	452	408	534
CSbapl.1707	BAPLcs_chr1;BAPLcs_chr1;BAPLcs_chr1	27184557;27185106;27185736	27185054;27185162;27185900	+;+;+	720	0	10	1	0	4	10
CSbapl.1708	BAPLcs_chr1;BAPLcs_chr1;BAPLcs_chr1;BAPLcs_chr1;BAPLcs_chr1;BAPLcs_chr1;BAPLcs_chr1;BAPLcs_chr1;BAPLcs_chr1;BAPLcs_chr1;BAPLcs_chr1;BAPLcs_chr1;BAPLcs_chr1;BAPLcs_chr1;BAPLcs_chr1;BAPLcs_chr1;BAPLcs_chr1;BAPLcs_chr1;BAPLcs_chr1;BAPLcs_chr1;BAPLcs_chr1;BAPLcs_chr1;BAPLcs_chr1	27189626;27193042;27195906;27196762;27197674;27198209;27198209;27201057;27201057;27203065;27203065;27205148;27205148;27207025;27207025;27209225;27209225;27209878;27209878;27210281;27210281;27211938;27211938	27189673;27193146;27196046;27196870;27197735;27198337;27198337;27201170;27201170;27203167;27203167;27205446;27205332;27207189;27207189;27209382;27209382;27209952;27209952;27210320;27210320;27211970;27211970	+;+;+;+;+;+;+;+;+;+;+;+;+;+;+;+;+;+;+;+;+;+;+	1581	98	394	70	120	210	351
CSbapl.1710	BAPLcs_chr1;BAPLcs_chr1;BAPLcs_chr1;BAPLcs_chr1;BAPLcs_chr1;BAPLcs_chr1;BAPLcs_chr1	27219774;27224583;27234423;27237510;27243329;27244176;27249935	27219808;27224665;27234482;27237599;27243382;27244274;27250086	+;+;+;+;+;+;+	573	47	47	62	23	43	32
CSbapl.1716	BAPLcs_chr1	27247617	27248345	+	729	0	0	0	1	0	1
CSbapl.1722	BAPLcs_chr1;BAPLcs_chr1;BAPLcs_chr1;BAPLcs_chr1;BAPLcs_chr1	27282674;27283907;27290747;27291869;27292999	27282719;27284092;27290917;27292039;27293084	+;+;+;+;+	660	34	49	12	9	33	38
CSbapl.1725	BAPLcs_chr1;BAPLcs_chr1;BAPLcs_chr1	27299571;27300248;27300255	27300192;27300595;27300595	-;-;-	970	2	0	0	0	0	4
CSbapl.1726	BAPLcs_chr1;BAPLcs_chr1;BAPLcs_chr1;BAPLcs_chr1;BAPLcs_chr1;BAPLcs_chr1;BAPLcs_chr1	27320235;27320235;27321886;27324413;27324413;27325454;27325454	27320370;27320370;27321951;27324523;27324523;27325563;27325563	+;+;+;+;+;+;+	423	34	49	35	15	27	28
CSbapl.1727	BAPLcs_chr1;BAPLcs_chr1;BAPLcs_chr1;BAPLcs_chr1;BAPLcs_chr1;BAPLcs_chr1;BAPLcs_chr1;BAPLcs_chr1;BAPLcs_chr1;BAPLcs_chr1;BAPLcs_chr1	27328322;27328322;27335591;27335611;27335611;27336510;27336510;27336510;27337566;27337566;27337566	27328701;27328701;27335788;27335788;27335788;27336632;27336632;27336632;27338261;27338261;27338261	-;-;-;-;-;-;-;-;-;-;-	1397	163	250	95	255	298	244
CSbapl.1728	BAPLcs_chr1;BAPLcs_chr1;BAPLcs_chr1;BAPLcs_chr1;BAPLcs_chr1;BAPLcs_chr1;BAPLcs_chr1;BAPLcs_chr1;BAPLcs_chr1;BAPLcs_chr1;BAPLcs_chr1;BAPLcs_chr1;BAPLcs_chr1;BAPLcs_chr1;BAPLcs_chr1;BAPLcs_chr1;BAPLcs_chr1;BAPLcs_chr1;BAPLcs_chr1;BAPLcs_chr1	27345867;27345867;27347469;27347469;27348163;27348163;27348952;27348952;27349355;27349355;27350709;27350709;27351421;27351421;27355177;27355177;27358386;27358386;27359803;27359803	27346023;27346023;27347600;27347600;27348251;27348251;27349014;27349014;27349405;27349405;27350823;27350823;27351513;27351513;27355277;27355277;27358454;27358454;27359874;27359874	+;+;+;+;+;+;+;+;+;+;+;+;+;+;+;+;+;+;+;+	942	743	767	488	1414	1489	1981
CSbapl.1729	BAPLcs_chr1;BAPLcs_chr1;BAPLcs_chr1;BAPLcs_chr1	27362366;27362366;27369193;27369193	27362596;27362596;27369348;27369348	-;-;-;-	387	8	10	2	7	8	11
CSbapl.1732	BAPLcs_chr1;BAPLcs_chr1;BAPLcs_chr1	27376692;27378285;27379925	27377161;27378600;27380479	-;-;-	1341	6	4	12	24	29	24
CSbapl.1735	BAPLcs_chr1;BAPLcs_chr1;BAPLcs_chr1	27388414;27390110;27391300	27388850;27390419;27391854	-;-;-	1302	3	0	4	50	25	32
CSbapl.1736	BAPLcs_chr1;BAPLcs_chr1;BAPLcs_chr1;BAPLcs_chr1;BAPLcs_chr1;BAPLcs_chr1;BAPLcs_chr1;BAPLcs_chr1;BAPLcs_chr1;BAPLcs_chr1;BAPLcs_chr1	27401043;27408017;27413160;27416975;27418785;27419513;27421405;27422934;27425532;27426565;27427471	27401124;27408206;27413286;27417114;27418902;27419571;27421522;27423056;27425741;27426664;27427526	+;+;+;+;+;+;+;+;+;+;+	1323	37	101	40	2479	2579	3647
CSbapl.1742	BAPLcs_chr1;BAPLcs_chr1;BAPLcs_chr1;BAPLcs_chr1;BAPLcs_chr1;BAPLcs_chr1;BAPLcs_chr1;BAPLcs_chr1;BAPLcs_chr1;BAPLcs_chr1;BAPLcs_chr1;BAPLcs_chr1;BAPLcs_chr1;BAPLcs_chr1;BAPLcs_chr1;BAPLcs_chr1;BAPLcs_chr1;BAPLcs_chr1;BAPLcs_chr1;BAPLcs_chr1;BAPLcs_chr1;BAPLcs_chr1;BAPLcs_chr1;BAPLcs_chr1;BAPLcs_chr1;BAPLcs_chr1;BAPLcs_chr1;BAPLcs_chr1;BAPLcs_chr1;BAPLcs_chr1;BAPLcs_chr1;BAPLcs_chr1;BAPLcs_chr1;BAP…	27432283;27433593;27436586;27440770;27440770;27441659;27441659;27443203;27443203;27443668;27443668;27445708;27445708;27446291;27446291;27447500;27447500;27448443;27448443;27449148;27449148;27452076;27452076;27452758;27452758;27454311;27454311;27456693;27456693;27457248;27457248;27458274;27458274;27459249;27459249;27460060;27460060;27461916;27461916	27432420;27433741;27436590;27440842;27440842;27441731;27441731;27443300;27443300;27443769;27443769;27445770;27445770;27446377;27446377;27447604;27447604;27448546;27448546;27449242;27449242;27452158;27452158;27452871;27452871;27454442;27454442;27456787;27456787;27457356;27457356;27458338;27458338;27459321;27459321;27460171;27460171;27462079;27462079	-;-;-;-;-;-;-;-;-;-;-;-;-;-;-;-;-;-;-;-;-;-;-;-;-;-;-;-;-;-;-;-;-;-;-;-;-;-;-	2039	734	889	546	608	838	692
CSbapl.1747	BAPLcs_chr1;BAPLcs_chr1;BAPLcs_chr1;BAPLcs_chr1;BAPLcs_chr1;BAPLcs_chr1;BAPLcs_chr1;BAPLcs_chr1;BAPLcs_chr1;BAPLcs_chr1;BAPLcs_chr1;BAPLcs_chr1;BAPLcs_chr1;BAPLcs_chr1;BAPLcs_chr1;BAPLcs_chr1;BAPLcs_chr1;BAPLcs_chr1;BAPLcs_chr1;BAPLcs_chr1;BAPLcs_chr1;BAPLcs_chr1;BAPLcs_chr1;BAPLcs_chr1;BAPLcs_chr1;BAPLcs_chr1;BAPLcs_chr1;BAPLcs_chr1	27504356;27504356;27504356;27504356;27506040;27506040;27506040;27506040;27506620;27506620;27506620;27506620;27507193;27507193;27507193;27507193;27508598;27508598;27508598;27508598;27509373;27509373;27509373;27509373;27510138;27510138;27510138;27510138	27504421;27504421;27504421;27504421;27506258;27506258;27506258;27506258;27506694;27506694;27506694;27506694;27507303;27507303;27507303;27507303;27508804;27508804;27508804;27508804;27509456;27509456;27509456;27509456;27510197;27510197;27510197;27510197	+;+;+;+;+;+;+;+;+;+;+;+;+;+;+;+;+;+;+;+;+;+;+;+;+;+;+;+	822	167	267	88	94	138	193
CSbapl.1748	BAPLcs_chr1	27517831	27518772	-	942	9	2	4	13	2	10
CSbapl.1752	BAPLcs_chr1;BAPLcs_chr1	27543702;27544234	27543857;27544824	-;-	747	0	0	0	0	2	1
CSbapl.1754	BAPLcs_chr1	27554327	27555124	-	798	0	0	0	0	6	0
CSbapl.1755	BAPLcs_chr1;BAPLcs_chr1;BAPLcs_chr1;BAPLcs_chr1;BAPLcs_chr1;BAPLcs_chr1;BAPLcs_chr1;BAPLcs_chr1;BAPLcs_chr1;BAPLcs_chr1	27559202;27559898;27560969;27561852;27563787;27565525;27566587;27567134;27568502;27569644	27559382;27560032;27561163;27562085;27563913;27565691;27566665;27567256;27568576;27569869	-;-;-;-;-;-;-;-;-;-	1542	57	231	57	74	78	52
CSbapl.1759	BAPLcs_chr1;BAPLcs_chr1;BAPLcs_chr1;BAPLcs_chr1;BAPLcs_chr1;BAPLcs_chr1;BAPLcs_chr1;BAPLcs_chr1;BAPLcs_chr1;BAPLcs_chr1;BAPLcs_chr1;BAPLcs_chr1;BAPLcs_chr1;BAPLcs_chr1;BAPLcs_chr1;BAPLcs_chr1;BAPLcs_chr1;BAPLcs_chr1;BAPLcs_chr1;BAPLcs_chr1;BAPLcs_chr1;BAPLcs_chr1;BAPLcs_chr1;BAPLcs_chr1	27603737;27603743;27603743;27606701;27606701;27606701;27607774;27607774;27607774;27608609;27608609;27608609;27609430;27609430;27609430;27610101;27610101;27610101;27611008;27613676;27615843;27617105;27618588;27622980	27603811;27603811;27603811;27606872;27606872;27606872;27607885;27607885;27607885;27608768;27608768;27608768;27609600;27609600;27609600;27610200;27610200;27610205;27611022;27613749;27616147;27617225;27618676;27623054	+;+;+;+;+;+;+;+;+;+;+;+;+;+;+;+;+;+;+;+;+;+;+;+	1474	377	590	334	2603	3469	4232
CSbapl.1761	BAPLcs_chr1;BAPLcs_chr1;BAPLcs_chr1;BAPLcs_chr1;BAPLcs_chr1;BAPLcs_chr1;BAPLcs_chr1;BAPLcs_chr1;BAPLcs_chr1;BAPLcs_chr1;BAPLcs_chr1;BAPLcs_chr1;BAPLcs_chr1;BAPLcs_chr1	27639627;27639627;27640235;27640235;27641379;27641379;27642409;27642409;27643406;27643406;27643986;27643986;27646638;27646638	27639740;27639740;27640427;27640427;27641498;27641498;27642545;27642545;27643584;27643584;27644198;27644198;27646743;27646746	-;-;-;-;-;-;-;-;-;-;-;-;-;-	1065	188	179	161	174	288	284
CSbapl.1766	BAPLcs_chr1;BAPLcs_chr1;BAPLcs_chr1;BAPLcs_chr1;BAPLcs_chr1;BAPLcs_chr1;BAPLcs_chr1;BAPLcs_chr1	27670357;27672236;27673608;27675042;27676462;27677911;27680573;27688214	27670431;27672795;27673708;27675140;27676771;27678068;27680660;27688343	-;-;-;-;-;-;-;-	1521	12	6	2	6	12	4
CSbapl.1768	BAPLcs_chr1;BAPLcs_chr1;BAPLcs_chr1;BAPLcs_chr1;BAPLcs_chr1;BAPLcs_chr1;BAPLcs_chr1;BAPLcs_chr1;BAPLcs_chr1;BAPLcs_chr1;BAPLcs_chr1;BAPLcs_chr1;BAPLcs_chr1;BAPLcs_chr1;BAPLcs_chr1;BAPLcs_chr1;BAPLcs_chr1;BAPLcs_chr1;BAPLcs_chr1;BAPLcs_chr1;BAPLcs_chr1;BAPLcs_chr1	27693662;27693808;27694465;27694470;27697920;27697920;27699142;27699142;27700048;27700048;27701641;27701641;27703195;27703195;27705411;27705411;27706521;27706521;27707688;27707688;27708471;27709952	27693823;27693827;27694580;27694580;27697989;27697989;27699277;27699277;27700102;27700102;27701740;27701740;27703281;27703281;27705548;27705548;27706632;27706632;27707819;27707836;27708604;27710101	+;+;+;+;+;+;+;+;+;+;+;+;+;+;+;+;+;+;+;+;+;+	1413	238	434	144	151	269	319
CSbapl.1769	BAPLcs_chr1	27718793	27719194	-	402	0	0	0	0	0	1
CSbapl.1771	BAPLcs_chr1;BAPLcs_chr1;BAPLcs_chr1;BAPLcs_chr1;BAPLcs_chr1;BAPLcs_chr1;BAPLcs_chr1;BAPLcs_chr1;BAPLcs_chr1;BAPLcs_chr1;BAPLcs_chr1;BAPLcs_chr1;BAPLcs_chr1;BAPLcs_chr1;BAPLcs_chr1;BAPLcs_chr1;BAPLcs_chr1;BAPLcs_chr1;BAPLcs_chr1;BAPLcs_chr1;BAPLcs_chr1;BAPLcs_chr1;BAPLcs_chr1;BAPLcs_chr1	27723951;27723969;27734419;27734419;27735056;27735056;27739042;27739042;27741549;27741549;27744799;27744799;27746778;27746778;27747954;27747954;27748795;27748795;27749670;27749673;27750341;27750994;27751595;27752664	27724091;27724091;27734486;27734486;27735149;27735149;27739169;27739169;27741678;27741678;27744944;27744944;27746886;27746886;27748033;27748033;27748903;27748907;27749802;27749713;27750402;27751051;27751652;27752883	+;+;+;+;+;+;+;+;+;+;+;+;+;+;+;+;+;+;+;+;+;+;+;+	1540	336	596	171	767	1158	1035
CSbapl.1773	BAPLcs_chr1;BAPLcs_chr1;BAPLcs_chr1;BAPLcs_chr1;BAPLcs_chr1;BAPLcs_chr1;BAPLcs_chr1;BAPLcs_chr1;BAPLcs_chr1;BAPLcs_chr1;BAPLcs_chr1;BAPLcs_chr1;BAPLcs_chr1;BAPLcs_chr1;BAPLcs_chr1;BAPLcs_chr1;BAPLcs_chr1;BAPLcs_chr1;BAPLcs_chr1;BAPLcs_chr1;BAPLcs_chr1;BAPLcs_chr1;BAPLcs_chr1;BAPLcs_chr1;BAPLcs_chr1;BAPLcs_chr1;BAPLcs_chr1;BAPLcs_chr1;BAPLcs_chr1;BAPLcs_chr1;BAPLcs_chr1;BAPLcs_chr1;BAPLcs_chr1;BAP…	27769490;27770609;27770930;27771994;27772675;27778720;27780388;27781144;27782771;27783620;27784339;27785877;27859847;27859847;27859847;27859847;27950353;27980818;27986457;27987102;27989866;27992039;28061049;28062603;28063641;28063962;28065023;28071768;28073436;28074192;28075819;28076668;28077387;28078925;28127623;28127623;28127623;28127623;28127623	27769657;27770678;27771006;27772160;27772767;27778769;27780508;27781217;27782841;27783673;27784422;27786050;27861526;27861526;27861526;27861526;27950997;27980906;27986543;27987246;27990558;27992221;28061198;28062689;28063710;28064038;28065189;28071817;28073556;28074265;28075889;28076721;28077470;28079098;28129950;28129950;28129950;28129950;28129950	-;-;-;-;-;-;-;-;-;-;-;-;-;-;-;-;-;-;-;-;-;-;-;-;-;-;-;-;-;-;-;-;-;-;-;-;-;-;-	8232	221	336	123	561	972	933
CSbapl.1774	BAPLcs_chr1;BAPLcs_chr1;BAPLcs_chr1;BAPLcs_chr1;BAPLcs_chr1;BAPLcs_chr1;BAPLcs_chr1;BAPLcs_chr1;BAPLcs_chr1;BAPLcs_chr1;BAPLcs_chr1;BAPLcs_chr1;BAPLcs_chr1;BAPLcs_chr1;BAPLcs_chr1;BAPLcs_chr1;BAPLcs_chr1;BAPLcs_chr1;BAPLcs_chr1;BAPLcs_chr1;BAPLcs_chr1;BAPLcs_chr1;BAPLcs_chr1;BAPLcs_chr1;BAPLcs_chr1;BAPLcs_chr1;BAPLcs_chr1;BAPLcs_chr1;BAPLcs_chr1;BAPLcs_chr1;BAPLcs_chr1;BAPLcs_chr1;BAPLcs_chr1;BAP…	27793067;27795035;27797452;27798953;27802784;27804939;27806975;27810610;27813052;27814594;27906632;27931746;27934689;27939377;27942650;27943850;27945527;27946581;27974474;28011112;28011112;28012956;28012956;28014446;28014446;28019662;28019662;28020501;28020501;28021672;28021672;28022431;28022431;28023421;28023421;28027193;28027193;28028062;28028062;28028873;28028873;28029655;28029655;28032421;280…	27793121;27795174;27797532;27799060;27803101;27805061;27807127;27810721;27813119;27814767;27907693;27931973;27934885;27939506;27942739;27943927;27945673;27946877;27974806;28011168;28011168;28013008;28013008;28014500;28014500;28019718;28019718;28020561;28020561;28021759;28021759;28022520;28022520;28023456;28023456;28027271;28027271;28028192;28028192;28028949;28028949;28029726;28029737;28032443;280…	+;+;+;+;+;+;+;+;+;+;+;+;+;+;+;+;+;+;+;+;+;+;+;+;+;+;+;+;+;+;+;+;+;+;+;+;+;+;+;+;+;+;+;+;+;+;+;+;+;+;+;+;+;+;+;+;+;+;+;+;+;+;+;+;+;+;+;+;+;+;+;+;+;+;+;+;+;+;+;+;+;+;+;+;+;+;+;+;+;+;+;+;+;+;+;+;+;+;+;+;+;+;+;+;+;+;+;+;+;+;+;+;+;+;+;+;+;+;+;+;+;+;+;+;+;+;+;+;+;+;+;+;+;+;+;+;+;+;+;+;+;+;+;+	12356	1001	1188	923	1283	1568	1812
CSbapl.1775	BAPLcs_chr1	28395441	28395812	-	372	0	0	4	0	0	0
CSbapl.1776	BAPLcs_chr1;BAPLcs_chr1;BAPLcs_chr1;BAPLcs_chr1;BAPLcs_chr1;BAPLcs_chr1;BAPLcs_chr1;BAPLcs_chr1;BAPLcs_chr1;BAPLcs_chr1;BAPLcs_chr1;BAPLcs_chr1;BAPLcs_chr1;BAPLcs_chr1;BAPLcs_chr1	28402508;28403435;28409747;28410600;28418553;28448273;28448273;28451154;28451154;28451154;28452251;28452251;28452251;28452820;28457291	28402813;28403596;28409890;28411754;28418641;28448304;28448304;28451396;28451396;28451396;28452394;28452320;28452440;28452850;28457293	-;-;-;-;-;-;-;-;-;-;-;-;-;-;-	2355	36	156	15	14	6	12
CSbapl.1779	BAPLcs_chr1	28423581	28424180	-	600	0	2	1	5	0	0
CSbapl.1782	BAPLcs_chr1;BAPLcs_chr1;BAPLcs_chr1;BAPLcs_chr1;BAPLcs_chr1;BAPLcs_chr1;BAPLcs_chr1;BAPLcs_chr1;BAPLcs_chr1;BAPLcs_chr1;BAPLcs_chr1;BAPLcs_chr1;BAPLcs_chr1;BAPLcs_chr1;BAPLcs_chr1;BAPLcs_chr1;BAPLcs_chr1;BAPLcs_chr1;BAPLcs_chr1;BAPLcs_chr1;BAPLcs_chr1;BAPLcs_chr1;BAPLcs_chr1;BAPLcs_chr1;BAPLcs_chr1;BAPLcs_chr1;BAPLcs_chr1;BAPLcs_chr1;BAPLcs_chr1;BAPLcs_chr1;BAPLcs_chr1;BAPLcs_chr1;BAPLcs_chr1;BAP…	28463313;28463313;28467027;28467027;28468896;28468896;28469760;28469760;28506841;28538613;28540910;28542547;28542608;28546218;28547760;28553362;28553362;28554343;28554343;28554343;28555573;28555573;28555573;28559155;28559155;28566104;28572856;28581411;28583117;28583117;28584114;28584114;28586042;28586042;28592873;28592879	28463365;28463365;28467269;28467269;28469039;28469039;28469793;28469793;28506843;28538641;28541167;28542690;28542690;28546248;28547762;28553390;28553390;28554585;28554585;28554585;28555716;28555716;28555716;28559182;28559182;28566106;28572879;28581439;28583359;28583359;28584257;28584257;28586072;28586072;28592893;28592893	-;-;-;-;-;-;-;-;-;-;-;-;-;-;-;-;-;-;-;-;-;-;-;-;-;-;-;-;-;-;-;-;-;-;-;-	1881	176	548	37	16	91	118
CSbapl.1784	BAPLcs_chr1	28523057	28527598	+	4542	0	0	0	0	1	0
CSbapl.1789	BAPLcs_chr1	28576891	28577766	-	876	1	0	0	0	0	0
CSbapl.1792	BAPLcs_chr1;BAPLcs_chr1;BAPLcs_chr1;BAPLcs_chr1;BAPLcs_chr1;BAPLcs_chr1;BAPLcs_chr1;BAPLcs_chr1;BAPLcs_chr1;BAPLcs_chr1;BAPLcs_chr1;BAPLcs_chr1;BAPLcs_chr1;BAPLcs_chr1;BAPLcs_chr1;BAPLcs_chr1;BAPLcs_chr1;BAPLcs_chr1;BAPLcs_chr1;BAPLcs_chr1;BAPLcs_chr1;BAPLcs_chr1;BAPLcs_chr1;BAPLcs_chr1	28600676;28600676;28601419;28601419;28602271;28602271;28602724;28607368;28620899;28623752;28623752;28624887;28624887;28626031;28626489;28636198;28637402;28637402;28638588;28638588;28639321;28639321;28641805;28641805	28600704;28600704;28601661;28601661;28602414;28602414;28602754;28607370;28620924;28623994;28623994;28625030;28625030;28626061;28626491;28636226;28637647;28637647;28638731;28638731;28639351;28639351;28641807;28641807	-;-;-;-;-;-;-;-;-;-;-;-;-;-;-;-;-;-;-;-;-;-;-;-	1350	856	1469	155	35	137	253
CSbapl.1793	BAPLcs_chr1;BAPLcs_chr1;BAPLcs_chr1;BAPLcs_chr1;BAPLcs_chr1;BAPLcs_chr1;BAPLcs_chr1;BAPLcs_chr1;BAPLcs_chr1;BAPLcs_chr1;BAPLcs_chr1;BAPLcs_chr1	28644890;28644890;28644890;28646642;28646646;28646646;28647897;28647897;28648589;28648589;28654060;28655148	28645074;28645074;28645070;28646789;28646789;28646789;28647927;28647927;28648591;28648591;28654296;28655217	-;-;-;-;-;-;-;-;-;-;-;-	674	6	521	35	4	0	4
CSbapl.1795	BAPLcs_chr1	28670210	28670617	-	408	0	0	0	4	5	0
CSbapl.1796	BAPLcs_chr1;BAPLcs_chr1;BAPLcs_chr1;BAPLcs_chr1;BAPLcs_chr1	28687650;28691463;28711451;28711451;28711451	28689315;28691593;28713631;28713631;28713631	+;+;+;+;+	3978	112	293	30	18	30	39
CSbapl.1797	BAPLcs_chr1;BAPLcs_chr1;BAPLcs_chr1;BAPLcs_chr1;BAPLcs_chr1;BAPLcs_chr1;BAPLcs_chr1;BAPLcs_chr1;BAPLcs_chr1;BAPLcs_chr1;BAPLcs_chr1;BAPLcs_chr1;BAPLcs_chr1;BAPLcs_chr1;BAPLcs_chr1;BAPLcs_chr1;BAPLcs_chr1	28714462;28717909;28717932;28720196;28720196;28721107;28742655;28745938;28745938;28746774;28746774;28746774;28748400;28748400;28748400;28749690;28751811	28714499;28718174;28718174;28720339;28720339;28721137;28742657;28745969;28745969;28747025;28747025;28747025;28748469;28748543;28748541;28749762;28751813	-;-;-;-;-;-;-;-;-;-;-;-;-;-;-;-;-	986	32	159	12	78	52	70
CSbapl.1801	BAPLcs_chr1;BAPLcs_chr1;BAPLcs_chr1;BAPLcs_chr1;BAPLcs_chr1;BAPLcs_chr1;BAPLcs_chr1;BAPLcs_chr1;BAPLcs_chr1;BAPLcs_chr1;BAPLcs_chr1;BAPLcs_chr1;BAPLcs_chr1;BAPLcs_chr1;BAPLcs_chr1;BAPLcs_chr1;BAPLcs_chr1;BAPLcs_chr1;BAPLcs_chr1;BAPLcs_chr1;BAPLcs_chr1;BAPLcs_chr1;BAPLcs_chr1;BAPLcs_chr1;BAPLcs_chr1;BAPLcs_chr1;BAPLcs_chr1;BAPLcs_chr1;BAPLcs_chr1;BAPLcs_chr1;BAPLcs_chr1;BAPLcs_chr1;BAPLcs_chr1;BAP…	28774497;28774497;28774497;28774497;28774497;28774497;28774497;28774497;28774497;28774497;28774497;28774497;28774497;28774497;28774497;28774497;28774497;28794766;28794766;28794766;28794766;28794766;28794766;28794766;28799980;28799980;28799980;28799980;28799980;28799980;28799980;28799980;28799980;28799980;28799980;28799980;28799980;28799980;28799980;28799980;28799980;28799980;28799980;28799980;287…	28774595;28774595;28774595;28774595;28774595;28774595;28774595;28774595;28774595;28774595;28774595;28774595;28774595;28774595;28774595;28774595;28774595;28794795;28794795;28794795;28794795;28794795;28794795;28794795;28800102;28800102;28800102;28800102;28800102;28800102;28800102;28800102;28800102;28800102;28800102;28800102;28800102;28800102;28800102;28800102;28800102;28800102;28800102;28800102;288…	+;+;+;+;+;+;+;+;+;+;+;+;+;+;+;+;+;+;+;+;+;+;+;+;+;+;+;+;+;+;+;+;+;+;+;+;+;+;+;+;+;+;+;+;+;+;+;+;+;+;+;+;+;+;+;+;+;+;+;+;+;+;+;+;+;+;+;+;+;+;+;+;+;+;+;+;+;+;+;+;+;+;+;+;+;+;+;+;+;+;+;+;+;+;+;+;+;+;+;+;+;+;+;+;+;+;+;+;+;+;+;+;+;+;+;+;+;+;+;+;+;+;+;+;+;+;+;+;+;+;+;+;+;+;+;+;+;+;+;+;+;+;+;+;+;+;+;+;+;+;+;+;+;+;+;+;+;+;+;+;+;+;+;+;+;+;+;+;+;+;+;+;+;+;+;+;+;+;+;+;+;+;+;+;+;+;+;+;+;+;+;+;+;+;+;+;+;+;+;+…	14769	155	512	180	675	431	485
CSbapl.1804	BAPLcs_chr1	29048554	29048868	-	315	14	4	0	6	3	0
CSbapl.1805	BAPLcs_chr1;BAPLcs_chr1	29048871;29050757	29049340;29050856	-;-	570	3	9	2	2	2	2
CSbapl.1806	BAPLcs_chr1;BAPLcs_chr1;BAPLcs_chr1;BAPLcs_chr1;BAPLcs_chr1;BAPLcs_chr1;BAPLcs_chr1;BAPLcs_chr1;BAPLcs_chr1;BAPLcs_chr1;BAPLcs_chr1;BAPLcs_chr1;BAPLcs_chr1;BAPLcs_chr1;BAPLcs_chr1;BAPLcs_chr1;BAPLcs_chr1;BAPLcs_chr1;BAPLcs_chr1;BAPLcs_chr1;BAPLcs_chr1;BAPLcs_chr1;BAPLcs_chr1;BAPLcs_chr1;BAPLcs_chr1;BAPLcs_chr1;BAPLcs_chr1;BAPLcs_chr1	29116443;29116443;29116443;29116443;29116539;29135036;29135036;29135036;29135036;29135036;29135781;29138026;29138026;29138026;29138026;29138026;29138026;29144408;29144408;29144408;29144408;29144408;29149705;29149705;29149705;29149705;29149705;29149705	29116603;29116603;29116603;29116603;29116603;29136136;29136136;29136136;29136136;29136136;29136136;29138172;29138172;29138172;29138172;29138172;29138172;29144551;29144551;29144551;29144551;29144551;29149798;29149798;29149798;29149798;29149798;29149798	-;-;-;-;-;-;-;-;-;-;-;-;-;-;-;-;-;-;-;-;-;-;-;-;-;-;-;-	1647	583	527	254	490	478	477
CSbapl.1809	BAPLcs_chr1;BAPLcs_chr1;BAPLcs_chr1;BAPLcs_chr1;BAPLcs_chr1	29177704;29178620;29180769;29182876;29187755	29177843;29179744;29180915;29183019;29187830	-;-;-;-;-	1632	0	0	0	0	2	2
CSbapl.1810	BAPLcs_chr1;BAPLcs_chr1;BAPLcs_chr1;BAPLcs_chr1	29194239;29195031;29195808;29198491	29194289;29195144;29195915;29199168	+;+;+;+	951	2	3	4	7	0	2
CSbapl.1813	BAPLcs_chr1	29216638	29217462	+	825	0	0	0	1	0	0
CSbapl.1815	BAPLcs_chr1;BAPLcs_chr1;BAPLcs_chr1;BAPLcs_chr1;BAPLcs_chr1;BAPLcs_chr1;BAPLcs_chr1;BAPLcs_chr1	29230742;29230742;29233459;29233459;29234259;29234259;29259011;29259011	29230813;29230813;29233621;29233621;29235490;29235490;29259997;29259997	+;+;+;+;+;+;+;+	2454	125	142	146	147	193	214
CSbapl.1816	BAPLcs_chr1;BAPLcs_chr1	29252843;29254666	29253607;29255844	-;-	1944	18	46	35	95	29	28
CSbapl.1818	BAPLcs_chr1;BAPLcs_chr1;BAPLcs_chr1;BAPLcs_chr1	29324572;29324572;29329870;29329870	29325220;29325220;29330321;29330321	-;-;-;-	1101	25	25	2	20	10	8
CSbapl.1819	BAPLcs_chr1	29328162	29328557	-	396	6	0	0	0	0	0
CSbapl.1820	BAPLcs_chr1;BAPLcs_chr1;BAPLcs_chr1;BAPLcs_chr1;BAPLcs_chr1;BAPLcs_chr1;BAPLcs_chr1;BAPLcs_chr1;BAPLcs_chr1;BAPLcs_chr1;BAPLcs_chr1;BAPLcs_chr1;BAPLcs_chr1;BAPLcs_chr1;BAPLcs_chr1;BAPLcs_chr1;BAPLcs_chr1;BAPLcs_chr1;BAPLcs_chr1;BAPLcs_chr1;BAPLcs_chr1;BAPLcs_chr1;BAPLcs_chr1;BAPLcs_chr1;BAPLcs_chr1;BAPLcs_chr1;BAPLcs_chr1;BAPLcs_chr1;BAPLcs_chr1;BAPLcs_chr1;BAPLcs_chr1;BAPLcs_chr1;BAPLcs_chr1;BAP…	29330867;29330867;29341399;29341399;29346329;29346329;29347005;29347053;29349864;29365155;29369584;29369626;29369626;29379724;29379724;29379724;29382311;29382311;29382311;29382432;29383602;29383602;29383602;29383602;29384437;29384437;29384437;29384437;29385613;29385613;29385613;29385613;29386637;29386637;29386637;29386637;29387169;29387169;29387169;29387169;29387764;29387764;29387764;29387764;293…	29330980;29330980;29341510;29341510;29346501;29346501;29347028;29347187;29349938;29365157;29369723;29369723;29369723;29380365;29380365;29380365;29382528;29382528;29382528;29382528;29383676;29383676;29383676;29383676;29384532;29384532;29384532;29384532;29385698;29385698;29385698;29385698;29386834;29386834;29386834;29386834;29387261;29387261;29387261;29387261;29387925;29387925;29387925;29387925;293…	+;+;+;+;+;+;+;+;+;+;+;+;+;+;+;+;+;+;+;+;+;+;+;+;+;+;+;+;+;+;+;+;+;+;+;+;+;+;+;+;+;+;+;+;+;+;+;+;+;+;+;+;+;+;+;+;+;+;+;+;+;+;+;+;+;+;+;+;+;+;+;+;+;+;+;+;+;+;+;+;+;+;+;+;+;+;+;+;+;+;+;+;+;+;+;+;+;+;+;+;+;+;+;+;+;+;+;+;+;+;+;+;+;+;+;+;+;+;+;+;+;+;+;+;+;+;+;+;+;+;+;+;+;+;+;+;+;+;+;+;+;+;+;+;+;+;+;+;+;+;+;+;+;+;+;+;+;+;+;+;+;+;+;+;+;+;+;+;+;+;+;+;+;+;+;+;+;+;+;+;+;+;+;+;+;+;+;+;+;+;+;+;+;+	7057	1187	2084	1129	2739	3217	3144
CSbapl.1821	BAPLcs_chr1;BAPLcs_chr1;BAPLcs_chr1;BAPLcs_chr1;BAPLcs_chr1;BAPLcs_chr1;BAPLcs_chr1;BAPLcs_chr1;BAPLcs_chr1;BAPLcs_chr1;BAPLcs_chr1;BAPLcs_chr1;BAPLcs_chr1;BAPLcs_chr1;BAPLcs_chr1;BAPLcs_chr1;BAPLcs_chr1;BAPLcs_chr1;BAPLcs_chr1;BAPLcs_chr1;BAPLcs_chr1;BAPLcs_chr1;BAPLcs_chr1;BAPLcs_chr1;BAPLcs_chr1;BAPLcs_chr1;BAPLcs_chr1;BAPLcs_chr1;BAPLcs_chr1;BAPLcs_chr1;BAPLcs_chr1;BAPLcs_chr1;BAPLcs_chr1;BAP…	29429551;29429551;29429551;29429564;29430179;29431924;29431924;29431924;29431924;29432705;29432705;29432705;29432705;29434582;29434582;29434582;29434582;29437779;29437779;29437779;29437779;29437786;29438638;29438638;29438638;29438638;29438638;29439250;29439250;29439250;29439250;29439250;29441196;29441196;29441196;29441196;29441196;29442431;29442431;29442431;29442431;29442431;29443266;29443266;294…	29429581;29429581;29429581;29429581;29430293;29432051;29432051;29432051;29432051;29432824;29432824;29432824;29432824;29434685;29434685;29434685;29434685;29437899;29437899;29437899;29437899;29437899;29438685;29438685;29438685;29438685;29438685;29439513;29439513;29439513;29439513;29439513;29441337;29441337;29441337;29441337;29441337;29442474;29442474;29442474;29442495;29442474;29443376;29443376;294…	+;+;+;+;+;+;+;+;+;+;+;+;+;+;+;+;+;+;+;+;+;+;+;+;+;+;+;+;+;+;+;+;+;+;+;+;+;+;+;+;+;+;+;+;+;+	1249	280	327	265	341	331	428
CSbapl.1822	BAPLcs_chr1;BAPLcs_chr1	29427388;29427388	29428209;29428209	-;-	822	64	71	61	159	98	152
CSbapl.1825	BAPLcs_chr1	29451551	29452147	+	597	0	0	2	1	0	0
CSbapl.1826	BAPLcs_chr1;BAPLcs_chr1;BAPLcs_chr1;BAPLcs_chr1;BAPLcs_chr1;BAPLcs_chr1;BAPLcs_chr1;BAPLcs_chr1;BAPLcs_chr1;BAPLcs_chr1;BAPLcs_chr1;BAPLcs_chr1;BAPLcs_chr1;BAPLcs_chr1;BAPLcs_chr1;BAPLcs_chr1;BAPLcs_chr1;BAPLcs_chr1	29452801;29452801;29452801;29457175;29457175;29457175;29458592;29458592;29459838;29459838;29460679;29460679;29461995;29461995;29463819;29463819;29465212;29465212	29452837;29452837;29452837;29457488;29457446;29457446;29459086;29459086;29459869;29459869;29460756;29460756;29462070;29462070;29463881;29463881;29465268;29465268	+;+;+;+;+;+;+;+;+;+;+;+;+;+;+;+;+;+	1152	327	593	345	547	1764	1220
CSbapl.1827	BAPLcs_chr1	29481513	29482016	-	504	0	0	2	0	0	0
CSbapl.1828	BAPLcs_chr1	29483553	29483900	-	348	1	0	3	2	0	0
CSbapl.1829	BAPLcs_chr1;BAPLcs_chr1;BAPLcs_chr1;BAPLcs_chr1;BAPLcs_chr1;BAPLcs_chr1;BAPLcs_chr1;BAPLcs_chr1;BAPLcs_chr1;BAPLcs_chr1;BAPLcs_chr1;BAPLcs_chr1;BAPLcs_chr1;BAPLcs_chr1;BAPLcs_chr1;BAPLcs_chr1;BAPLcs_chr1;BAPLcs_chr1	29484783;29484783;29490181;29490181;29491361;29491361;29496185;29496185;29498126;29498126;29498881;29498881;29499585;29499585;29504505;29504505;29515482;29515497	29484928;29484928;29490274;29490274;29491443;29491443;29496236;29496236;29498254;29498254;29498972;29498972;29499634;29499634;29504613;29504613;29515782;29515782	+;+;+;+;+;+;+;+;+;+;+;+;+;+;+;+;+;+	1056	40	72	29	83	70	72
CSbapl.1833	BAPLcs_chr1;BAPLcs_chr1;BAPLcs_chr1;BAPLcs_chr1;BAPLcs_chr1;BAPLcs_chr1;BAPLcs_chr1;BAPLcs_chr1;BAPLcs_chr1;BAPLcs_chr1;BAPLcs_chr1;BAPLcs_chr1;BAPLcs_chr1;BAPLcs_chr1;BAPLcs_chr1;BAPLcs_chr1;BAPLcs_chr1;BAPLcs_chr1;BAPLcs_chr1;BAPLcs_chr1;BAPLcs_chr1;BAPLcs_chr1;BAPLcs_chr1;BAPLcs_chr1;BAPLcs_chr1;BAPLcs_chr1;BAPLcs_chr1;BAPLcs_chr1;BAPLcs_chr1;BAPLcs_chr1;BAPLcs_chr1;BAPLcs_chr1;BAPLcs_chr1;BAP…	29540947;29540947;29540947;29540947;29542980;29542980;29542980;29542980;29561477;29561477;29561477;29561477;29563595;29563906;29564295;29564295;29565526;29565526;29565999;29565999;29566711;29566711;29573691;29573691;29574259;29574259;29575604;29575604;29589195;29589195;29589644;29589644;29590097;29590097;29591062;29591062;29591999;29591999;29592017;29602638;29602638;29602638;29604607;29604607;296…	29541030;29541030;29541030;29541030;29543036;29543036;29543036;29543036;29561671;29561671;29561671;29561671;29563666;29563971;29564402;29564402;29565645;29565645;29566067;29566067;29566796;29566796;29573826;29573826;29574396;29574396;29575752;29575752;29589355;29589355;29589772;29589772;29590160;29590160;29591176;29591176;29592114;29592114;29592114;29602808;29602808;29602808;29604667;29604667;296…	-;-;-;-;-;-;-;-;-;-;-;-;-;-;-;-;-;-;-;-;-;-;-;-;-;-;-;-;-;-;-;-;-;-;-;-;-;-;-;-;-;-;-;-;-;-;-;-;-;-;-;-;-;-;-;-;-;-;-;-	3042	533	782	359	111	137	187
CSbapl.1834	BAPLcs_chr1;BAPLcs_chr1;BAPLcs_chr1;BAPLcs_chr1;BAPLcs_chr1	29548399;29551676;29554370;29554455;29555266	29549033;29551753;29554935;29554934;29555621	-;-;-;-;-	1635	6	16	16	1	0	3
CSbapl.1838	BAPLcs_chr1;BAPLcs_chr1	29636227;29639077	29637216;29639181	-;-	1095	2	2	2	4	0	2
CSbapl.1840	BAPLcs_chr1	29645920	29646372	-	453	0	0	0	6	1	0
CSbapl.1841	BAPLcs_chr1	29650700	29651152	-	453	1	0	0	2	9	0
CSbapl.1843	BAPLcs_chr1;BAPLcs_chr1;BAPLcs_chr1;BAPLcs_chr1;BAPLcs_chr1;BAPLcs_chr1;BAPLcs_chr1;BAPLcs_chr1;BAPLcs_chr1;BAPLcs_chr1;BAPLcs_chr1;BAPLcs_chr1;BAPLcs_chr1;BAPLcs_chr1;BAPLcs_chr1	29676883;29676883;29680583;29683108;29683108;29683108;29685168;29685168;29685168;29687352;29687352;29687352;29689170;29689170;29689170	29676924;29676924;29680630;29683162;29683162;29683162;29685273;29685273;29685273;29687469;29687469;29687469;29690021;29689916;29690021	-;-;-;-;-;-;-;-;-;-;-;-;-;-;-	1221	117	290	96	163	260	276
CSbapl.1844	BAPLcs_chr1;BAPLcs_chr1;BAPLcs_chr1;BAPLcs_chr1;BAPLcs_chr1;BAPLcs_chr1;BAPLcs_chr1;BAPLcs_chr1;BAPLcs_chr1;BAPLcs_chr1;BAPLcs_chr1;BAPLcs_chr1;BAPLcs_chr1;BAPLcs_chr1;BAPLcs_chr1;BAPLcs_chr1;BAPLcs_chr1;BAPLcs_chr1;BAPLcs_chr1;BAPLcs_chr1;BAPLcs_chr1	29711386;29711386;29711386;29713184;29713184;29713184;29713843;29713843;29713843;29714461;29714461;29714461;29720092;29720092;29720092;29721802;29721802;29721802;29722298;29722298;29722298	29711805;29711805;29711805;29713267;29713267;29713267;29713950;29713950;29713950;29714527;29714527;29714527;29720256;29720256;29720256;29721851;29721851;29721851;29722372;29722372;29722372	-;-;-;-;-;-;-;-;-;-;-;-;-;-;-;-;-;-;-;-;-	969	46	65	27	36	55	58
CSbapl.1845	BAPLcs_chr1;BAPLcs_chr1;BAPLcs_chr1;BAPLcs_chr1;BAPLcs_chr1;BAPLcs_chr1;BAPLcs_chr1	29735708;29738600;29739995;29741180;29743383;29745022;29747319	29735841;29738724;29740147;29741298;29743534;29745094;29747450	+;+;+;+;+;+;+	888	15	32	12	95	117	147
CSbapl.1848	BAPLcs_chr1;BAPLcs_chr1;BAPLcs_chr1;BAPLcs_chr1;BAPLcs_chr1;BAPLcs_chr1;BAPLcs_chr1;BAPLcs_chr1;BAPLcs_chr1;BAPLcs_chr1;BAPLcs_chr1;BAPLcs_chr1	29786489;29786489;29788062;29788062;29793169;29793169;29796386;29796386;29798320;29798320;29800899;29800899	29787025;29787025;29788184;29788184;29793377;29793377;29796636;29796636;29798499;29798499;29800981;29800981	+;+;+;+;+;+;+;+;+;+;+;+	1383	18	19	5	70	41	94
CSbapl.1849	BAPLcs_chr1;BAPLcs_chr1	29805903;29807881	29806283;29807958	-;-	459	6	0	0	0	0	0
CSbapl.1851	BAPLcs_chr1;BAPLcs_chr1	29813501;29837179	29813959;29837337	-;-	618	76	1	0	14	0	4
CSbapl.1852	BAPLcs_chr1	29819098	29819709	+	612	0	2	2	2	0	0
CSbapl.1856	BAPLcs_chr1;BAPLcs_chr1	29848043;29860377	29848557;29860611	-;-	750	4	6	8	0	4	0
CSbapl.1857	BAPLcs_chr1	29852830	29853804	+	975	0	0	0	3	0	0
CSbapl.1858	BAPLcs_chr1;BAPLcs_chr1;BAPLcs_chr1	29857246;29858360;29877156	29857477;29858435;29877180	-;-;-	333	5	0	3	0	0	1
CSbapl.1860	BAPLcs_chr1	29869510	29870913	+	1404	0	2	1	11	0	0
CSbapl.1861	BAPLcs_chr1;BAPLcs_chr1;BAPLcs_chr1	29874216;29878162;29880244	29874758;29878295;29880304	-;-;-	738	9	12	6	4	2	10
CSbapl.1862	BAPLcs_chr1;BAPLcs_chr1;BAPLcs_chr1;BAPLcs_chr1;BAPLcs_chr1	29885376;29887253;29887908;29890443;29904974	29885460;29887331;29887949;29890602;29905039	-;-;-;-;-	432	31	98	47	14	22	50
CSbapl.1863	BAPLcs_chr1	29944244	29945494	-	1251	26	7	0	4	2	0
CSbapl.1864	BAPLcs_chr1;BAPLcs_chr1;BAPLcs_chr1;BAPLcs_chr1;BAPLcs_chr1;BAPLcs_chr1;BAPLcs_chr1;BAPLcs_chr1;BAPLcs_chr1;BAPLcs_chr1;BAPLcs_chr1;BAPLcs_chr1;BAPLcs_chr1;BAPLcs_chr1;BAPLcs_chr1;BAPLcs_chr1;BAPLcs_chr1;BAPLcs_chr1;BAPLcs_chr1;BAPLcs_chr1;BAPLcs_chr1;BAPLcs_chr1;BAPLcs_chr1	29957177;29968814;29970029;29971809;29973815;29974782;29977009;29979341;29982502;29983642;29985740;29986466;29987013;29987649;29988616;29989369;29990301;29993251;29994878;29996212;29997933;29999072;29999934	29957489;29969003;29970094;29972022;29973923;29974948;29977407;29979458;29982633;29983815;29985844;29986585;29987186;29987789;29988867;29989552;29990507;29993486;29995177;29996493;29998085;29999242;30000157	+;+;+;+;+;+;+;+;+;+;+;+;+;+;+;+;+;+;+;+;+;+;+	4431	4	12	2	0	8	3
CSbapl.1866	BAPLcs_chr1	30021879	30023864	+	1986	2	2	2	0	0	0
CSbapl.1867	BAPLcs_chr1;BAPLcs_chr1;BAPLcs_chr1;BAPLcs_chr1;BAPLcs_chr1;BAPLcs_chr1;BAPLcs_chr1;BAPLcs_chr1;BAPLcs_chr1;BAPLcs_chr1;BAPLcs_chr1;BAPLcs_chr1;BAPLcs_chr1;BAPLcs_chr1;BAPLcs_chr1;BAPLcs_chr1;BAPLcs_chr1;BAPLcs_chr1;BAPLcs_chr1;BAPLcs_chr1;BAPLcs_chr1;BAPLcs_chr1;BAPLcs_chr1;BAPLcs_chr1;BAPLcs_chr1;BAPLcs_chr1;BAPLcs_chr1;BAPLcs_chr1;BAPLcs_chr1;BAPLcs_chr1;BAPLcs_chr1;BAPLcs_chr1;BAPLcs_chr1;BAP…	30053499;30053499;30067482;30067482;30068494;30072661;30072661;30072661;30074128;30074128;30074128;30075621;30075621;30075621;30077966;30077966;30077966;30078643;30078643;30078643;30080360;30080360;30080360;30080883;30080883;30080883;30081711;30081711;30081711;30085004;30085004;30085004;30085462;30085462;30085462;30090996;30090996;30090996;30092706;30092706;30092706	30053560;30053560;30067567;30067567;30068572;30072767;30072767;30072767;30074293;30074293;30074293;30075682;30075682;30075682;30078073;30078073;30078073;30078818;30078818;30078818;30080546;30080546;30080546;30080975;30080975;30080975;30081810;30081810;30081810;30085100;30085100;30085100;30085561;30085561;30085561;30091133;30091133;30091133;30092789;30092789;30092789	+;+;+;+;+;+;+;+;+;+;+;+;+;+;+;+;+;+;+;+;+;+;+;+;+;+;+;+;+;+;+;+;+;+;+;+;+;+;+;+;+	1645	89	270	60	166	66	94
CSbapl.1868	BAPLcs_chr1;BAPLcs_chr1;BAPLcs_chr1;BAPLcs_chr1;BAPLcs_chr1;BAPLcs_chr1;BAPLcs_chr1;BAPLcs_chr1;BAPLcs_chr1;BAPLcs_chr1;BAPLcs_chr1;BAPLcs_chr1;BAPLcs_chr1;BAPLcs_chr1	30110164;30112592;30113220;30114615;30116218;30117357;30118119;30118931;30119906;30120592;30121333;30122848;30125105;30127128	30110259;30112683;30113382;30114686;30116322;30117485;30118250;30119145;30119992;30120677;30121428;30123011;30125149;30127193	-;-;-;-;-;-;-;-;-;-;-;-;-;-	1548	230	248	48	779	329	579
CSbapl.1869	BAPLcs_chr1;BAPLcs_chr1;BAPLcs_chr1;BAPLcs_chr1;BAPLcs_chr1;BAPLcs_chr1;BAPLcs_chr1	30128429;30128429;30130873;30130873;30133574;30133574;30134596	30128593;30128593;30130942;30130942;30133791;30133756;30134852	+;+;+;+;+;+;+	710	16	24	9	20	16	36
CSbapl.1870	BAPLcs_chr1;BAPLcs_chr1;BAPLcs_chr1;BAPLcs_chr1;BAPLcs_chr1;BAPLcs_chr1;BAPLcs_chr1;BAPLcs_chr1;BAPLcs_chr1;BAPLcs_chr1;BAPLcs_chr1	30169718;30170238;30171495;30172174;30172845;30173835;30174837;30175462;30176094;30177096;30178494	30169847;30170329;30171608;30172366;30172987;30173962;30174987;30175614;30176263;30177218;30178716	+;+;+;+;+;+;+;+;+;+;+	1620	38	63	37	308	683	400
CSbapl.1871	BAPLcs_chr1;BAPLcs_chr1;BAPLcs_chr1;BAPLcs_chr1;BAPLcs_chr1;BAPLcs_chr1;BAPLcs_chr1;BAPLcs_chr1;BAPLcs_chr1;BAPLcs_chr1;BAPLcs_chr1;BAPLcs_chr1;BAPLcs_chr1;BAPLcs_chr1;BAPLcs_chr1;BAPLcs_chr1;BAPLcs_chr1;BAPLcs_chr1;BAPLcs_chr1;BAPLcs_chr1;BAPLcs_chr1;BAPLcs_chr1;BAPLcs_chr1;BAPLcs_chr1;BAPLcs_chr1;BAPLcs_chr1;BAPLcs_chr1;BAPLcs_chr1;BAPLcs_chr1;BAPLcs_chr1;BAPLcs_chr1;BAPLcs_chr1;BAPLcs_chr1;BAP…	30196944;30196944;30196944;30198365;30198365;30198365;30199121;30199121;30199121;30199738;30199738;30199738;30203777;30203777;30203777;30204847;30204847;30204847;30211880;30211880;30211880;30212846;30212846;30212846;30213568;30213568;30213568;30214275;30214275;30214275;30215893;30215893;30215893;30216535;30216535;30216535;30231556;30259609;30259609;30261801;30262996;30262996;30265427;30265427;302…	30197027;30197027;30197027;30198504;30198504;30198504;30199201;30199201;30199201;30199816;30199816;30199816;30203926;30203926;30203926;30204947;30204947;30204947;30211943;30211943;30211943;30212991;30212991;30212991;30213633;30213633;30213633;30214515;30214515;30214515;30216032;30216032;30216032;30216661;30216661;30216661;30231636;30259697;30259697;30261830;30263057;30263057;30265584;30265584;302…	-;-;-;-;-;-;-;-;-;-;-;-;-;-;-;-;-;-;-;-;-;-;-;-;-;-;-;-;-;-;-;-;-;-;-;-;-;-;-;-;-;-;-;-;-;-;-;-;-;-;-;-;-;-;-;-;-;-;-;-;-;-;-;-;-;-;-;-;-;-;-;-;-;-;-;-;-	3894	316	733	191	426	947	671
CSbapl.1873	BAPLcs_chr1	30309569	30311014	+	1446	10	8	2	64	56	75
CSbapl.1874	BAPLcs_chr1;BAPLcs_chr1;BAPLcs_chr1	30317519;30324203;30325903	30318546;30325060;30325972	-;-;-	1956	0	12	2	0	2	2
CSbapl.1875	BAPLcs_chr1;BAPLcs_chr1;BAPLcs_chr1;BAPLcs_chr1;BAPLcs_chr1;BAPLcs_chr1;BAPLcs_chr1;BAPLcs_chr1;BAPLcs_chr1;BAPLcs_chr1;BAPLcs_chr1;BAPLcs_chr1;BAPLcs_chr1;BAPLcs_chr1;BAPLcs_chr1;BAPLcs_chr1;BAPLcs_chr1;BAPLcs_chr1;BAPLcs_chr1;BAPLcs_chr1;BAPLcs_chr1;BAPLcs_chr1;BAPLcs_chr1;BAPLcs_chr1;BAPLcs_chr1;BAPLcs_chr1;BAPLcs_chr1;BAPLcs_chr1;BAPLcs_chr1;BAPLcs_chr1;BAPLcs_chr1;BAPLcs_chr1;BAPLcs_chr1;BAP…	30337304;30338327;30338866;30339707;30341511;30342344;30344561;30344932;30348872;30354871;30404012;30408428;30410861;30417506;30419020;30420382;30445116;30529862;30530233;30532870;30533456;30534196;30572051;30576172;30578604;30871823;30871823;30871823;30871823;30871823;30876333;30992727;30994962;31252545;31358659;31380284	30337447;30338380;30339015;30339818;30341552;30342411;30344671;30345005;30349013;30355003;30404022;30409752;30410915;30417730;30419216;30420484;30445484;30529972;30530306;30532928;30533495;30534301;30572485;30577496;30578649;30874933;30874933;30874933;30874933;30874933;30877421;30993850;30995007;31253240;31361253;31382278	-;-;-;-;-;-;-;-;-;-;-;-;-;-;-;-;-;-;-;-;-;-;-;-;-;-;-;-;-;-;-;-;-;-;-;-	16167	36	43	14	30	19	38
CSbapl.1878	BAPLcs_chr1;BAPLcs_chr1;BAPLcs_chr1;BAPLcs_chr1;BAPLcs_chr1;BAPLcs_chr1;BAPLcs_chr1;BAPLcs_chr1;BAPLcs_chr1;BAPLcs_chr1;BAPLcs_chr1;BAPLcs_chr1;BAPLcs_chr1;BAPLcs_chr1;BAPLcs_chr1;BAPLcs_chr1;BAPLcs_chr1;BAPLcs_chr1;BAPLcs_chr1;BAPLcs_chr1;BAPLcs_chr1;BAPLcs_chr1;BAPLcs_chr1;BAPLcs_chr1;BAPLcs_chr1;BAPLcs_chr1;BAPLcs_chr1;BAPLcs_chr1;BAPLcs_chr1;BAPLcs_chr1;BAPLcs_chr1;BAPLcs_chr1	30848558;30848558;30848558;30848558;30879410;30879410;30879410;30882073;30882073;30882073;30885340;30885340;30885340;30885340;30888109;30888109;30888109;31019576;31022158;31023194;31042734;31059063;31064977;31064977;31066203;31066203;31067398;31067398;31089787;31089787;31093125;31380284	30848627;30848627;30848627;30848627;30879724;30879724;30879724;30882387;30882387;30882387;30885451;30885451;30885449;30885451;30888163;30888163;30888163;31021711;31022711;31023350;31042803;31059078;31065267;31065267;31066341;31066341;31067564;31067564;31090098;31090097;31093294;31382278	+;+;+;+;+;+;+;+;+;+;+;+;+;+;+;+;+;+;+;+;+;+;+;+;+;+;+;+;+;+;+;+	6874	273	633	187	293	710	462
CSbapl.1879	BAPLcs_chr1;BAPLcs_chr1;BAPLcs_chr1	30719984;30722411;30769345	30720132;30722562;30769766	+;+;+	723	31	82	60	61	22	39
CSbapl.1880	BAPLcs_chr1;BAPLcs_chr1;BAPLcs_chr1;BAPLcs_chr1;BAPLcs_chr1;BAPLcs_chr1	31321150;31321150;31330790;31330790;31341203;31341203	31321219;31321219;31331101;31331101;31341318;31341318	+;+;+;+;+;+	498	66	73	19	160	223	139
CSbapl.1881	BAPLcs_chr1;BAPLcs_chr1;BAPLcs_chr1;BAPLcs_chr1;BAPLcs_chr1;BAPLcs_chr1;BAPLcs_chr1;BAPLcs_chr1;BAPLcs_chr1;BAPLcs_chr1;BAPLcs_chr1;BAPLcs_chr1;BAPLcs_chr1	31396482;31406744;31406744;31410907;31410907;31411634;31411634;31413168;31413168;31416738;31416738;31419173;31419173	31396763;31406826;31406826;31411000;31411000;31411827;31411827;31413338;31413338;31416852;31416852;31419223;31419223	+;+;+;+;+;+;+;+;+;+;+;+;+	990	32	69	15	41	37	31
CSbapl.1883	BAPLcs_chr1;BAPLcs_chr1;BAPLcs_chr1;BAPLcs_chr1;BAPLcs_chr1;BAPLcs_chr1;BAPLcs_chr1;BAPLcs_chr1;BAPLcs_chr1;BAPLcs_chr1;BAPLcs_chr1;BAPLcs_chr1;BAPLcs_chr1;BAPLcs_chr1;BAPLcs_chr1;BAPLcs_chr1;BAPLcs_chr1;BAPLcs_chr1;BAPLcs_chr1;BAPLcs_chr1;BAPLcs_chr1;BAPLcs_chr1;BAPLcs_chr1;BAPLcs_chr1;BAPLcs_chr1;BAPLcs_chr1;BAPLcs_chr1;BAPLcs_chr1;BAPLcs_chr1;BAPLcs_chr1;BAPLcs_chr1;BAPLcs_chr1;BAPLcs_chr1;BAP…	31437281;31437281;31437281;31437281;31456943;31456943;31456943;31456943;31462097;31462097;31462097;31465471;31465471;31465471;31465471;31465471;31465471;31465471;31468138;31468138;31468138;31468138;31468138;31468138;31468138;31468983;31468983;31468983;31468983;31468983;31468983;31468983;31470502;31470502;31470502;31470502;31470502;31470502;31470502;31471187;31471187;31471187;31471187;31474956;314…	31437379;31437379;31437379;31437379;31457114;31457114;31457114;31457114;31462166;31462166;31462166;31465686;31465686;31465686;31465686;31465686;31465686;31465686;31468200;31468200;31468200;31468200;31468200;31468200;31468200;31469081;31469081;31469081;31469081;31469081;31469081;31469081;31470756;31470756;31470756;31470756;31470756;31470756;31470756;31471222;31471222;31471222;31471222;31475033;314…	+;+;+;+;+;+;+;+;+;+;+;+;+;+;+;+;+;+;+;+;+;+;+;+;+;+;+;+;+;+;+;+;+;+;+;+;+;+;+;+;+;+;+;+;+;+;+;+;+;+;+;+;+;+;+;+;+;+;+;+;+;+;+;+;+;+;+;+;+;+;+;+;+;+;+;+;+;+;+;+;+;+;+;+;+;+;+;+;+;+	1846	197	300	95	80	171	71
CSbapl.1884	BAPLcs_chr1;BAPLcs_chr1	31496209;31503593	31496272;31504008	+;+	480	98	96	43	44	74	99
CSbapl.1885	BAPLcs_chr1;BAPLcs_chr1;BAPLcs_chr1;BAPLcs_chr1;BAPLcs_chr1;BAPLcs_chr1;BAPLcs_chr1;BAPLcs_chr1;BAPLcs_chr1;BAPLcs_chr1;BAPLcs_chr1;BAPLcs_chr1;BAPLcs_chr1;BAPLcs_chr1;BAPLcs_chr1;BAPLcs_chr1;BAPLcs_chr1;BAPLcs_chr1;BAPLcs_chr1;BAPLcs_chr1;BAPLcs_chr1;BAPLcs_chr1;BAPLcs_chr1;BAPLcs_chr1;BAPLcs_chr1;BAPLcs_chr1;BAPLcs_chr1;BAPLcs_chr1	31518413;31518413;31518413;31518413;31518413;31522157;31522157;31522157;31522157;31522157;31525672;31525672;31525672;31525672;31525672;31532425;31532425;31532425;31532425;31532425;31533866;31533866;31533866;31533866;31533866;31535563;31535563;31535563	31518484;31518484;31518484;31518484;31518484;31522271;31522271;31522271;31522271;31522271;31525836;31525836;31525836;31525836;31525836;31532624;31532624;31532624;31532624;31532624;31533959;31533955;31533955;31533959;31533959;31535624;31535624;31535624	-;-;-;-;-;-;-;-;-;-;-;-;-;-;-;-;-;-;-;-;-;-;-;-;-;-;-;-	708	274	441	269	395	384	538
CSbapl.1886	BAPLcs_chr1;BAPLcs_chr1;BAPLcs_chr1;BAPLcs_chr1;BAPLcs_chr1;BAPLcs_chr1;BAPLcs_chr1;BAPLcs_chr1;BAPLcs_chr1;BAPLcs_chr1;BAPLcs_chr1;BAPLcs_chr1;BAPLcs_chr1;BAPLcs_chr1;BAPLcs_chr1;BAPLcs_chr1;BAPLcs_chr1;BAPLcs_chr1;BAPLcs_chr1;BAPLcs_chr1;BAPLcs_chr1;BAPLcs_chr1;BAPLcs_chr1;BAPLcs_chr1	31555865;31555865;31555865;31555865;31558352;31558352;31558352;31558352;31560198;31560198;31560198;31560198;31561181;31561181;31561181;31561181;31562267;31562267;31562267;31562267;31563287;31563287;31563287;31563287	31555919;31555919;31555919;31555919;31558441;31558441;31558441;31558441;31560410;31560410;31560410;31560410;31561344;31561344;31561344;31561344;31562363;31562363;31562363;31562363;31563357;31563357;31563357;31563357	-;-;-;-;-;-;-;-;-;-;-;-;-;-;-;-;-;-;-;-;-;-;-;-	690	95	97	88	507	332	675
CSbapl.1887	BAPLcs_chr1	31568835	31569212	-	378	6	4	2	0	0	0
CSbapl.1888	BAPLcs_chr1;BAPLcs_chr1	31572496;31574585	31572564;31575043	+;+	528	27	3	0	30	0	2
CSbapl.1891	BAPLcs_chr1;BAPLcs_chr1	31581329;31583005	31581406;31583385	+;+	459	5	0	0	2	0	0
CSbapl.1893	BAPLcs_chr1;BAPLcs_chr1;BAPLcs_chr1;BAPLcs_chr1;BAPLcs_chr1;BAPLcs_chr1;BAPLcs_chr1;BAPLcs_chr1;BAPLcs_chr1;BAPLcs_chr1;BAPLcs_chr1;BAPLcs_chr1	31587415;31587415;31589622;31589622;31590707;31590707;31594045;31594045;31601895;31601895;31603054;31603054	31587497;31587497;31589801;31589801;31590957;31590957;31594253;31594253;31602017;31602017;31603590;31603590	-;-;-;-;-;-;-;-;-;-;-;-	1383	16	40	16	107	75	74
CSbapl.1894	BAPLcs_chr1;BAPLcs_chr1;BAPLcs_chr1;BAPLcs_chr1;BAPLcs_chr1;BAPLcs_chr1;BAPLcs_chr1;BAPLcs_chr1;BAPLcs_chr1;BAPLcs_chr1;BAPLcs_chr1	31610541;31612668;31621538;31631858;31634345;31636682;31638241;31640501;31641650;31643072;31644686	31610663;31612783;31621613;31631982;31634456;31636754;31638392;31640619;31641802;31643196;31644819	-;-;-;-;-;-;-;-;-;-;-	1308	20	24	45	85	54	179
CSbapl.1896	BAPLcs_chr1;BAPLcs_chr1;BAPLcs_chr1;BAPLcs_chr1;BAPLcs_chr1;BAPLcs_chr1;BAPLcs_chr1;BAPLcs_chr1;BAPLcs_chr1;BAPLcs_chr1;BAPLcs_chr1;BAPLcs_chr1;BAPLcs_chr1;BAPLcs_chr1;BAPLcs_chr1;BAPLcs_chr1;BAPLcs_chr1;BAPLcs_chr1;BAPLcs_chr1;BAPLcs_chr1	31657630;31658134;31658134;31658655;31658655;31660250;31660250;31660250;31665984;31665984;31665984;31666560;31666560;31666560;31667244;31667244;31667244;31668871;31668871;31668871	31657727;31658208;31658208;31658704;31658704;31660414;31660414;31660414;31666050;31666050;31666050;31666667;31666667;31666667;31667327;31667327;31667327;31669290;31669290;31669290	+;+;+;+;+;+;+;+;+;+;+;+;+;+;+;+;+;+;+;+	1067	34	53	37	51	51	63
CSbapl.1898	BAPLcs_chr1;BAPLcs_chr1;BAPLcs_chr1;BAPLcs_chr1;BAPLcs_chr1;BAPLcs_chr1;BAPLcs_chr1;BAPLcs_chr1;BAPLcs_chr1;BAPLcs_chr1;BAPLcs_chr1;BAPLcs_chr1;BAPLcs_chr1;BAPLcs_chr1	31690614;31690614;31693168;31693168;31693183;31695363;31695363;31695363;31697469;31697469;31697469;31700007;31703708;31703708	31691465;31691465;31693285;31693285;31693285;31695468;31695468;31695468;31697523;31697523;31697523;31700054;31703749;31703749	+;+;+;+;+;+;+;+;+;+;+;+;+;+	1221	319	453	149	266	418	385
CSbapl.1901	BAPLcs_chr1;BAPLcs_chr1;BAPLcs_chr1;BAPLcs_chr1;BAPLcs_chr1;BAPLcs_chr1;BAPLcs_chr1;BAPLcs_chr1;BAPLcs_chr1;BAPLcs_chr1;BAPLcs_chr1;BAPLcs_chr1;BAPLcs_chr1;BAPLcs_chr1;BAPLcs_chr1;BAPLcs_chr1	31714337;31765845;31768752;31770141;31770462;31770646;31770772;31770772;31771767;31771767;31773794;31773794;31774622;31774622;31776020;31776020	31714489;31765899;31768822;31770412;31770596;31770736;31770926;31770926;31771970;31771970;31773963;31773963;31774698;31774698;31776307;31776307	+;+;+;+;+;+;+;+;+;+;+;+;+;+;+;+	1671	68	87	54	155	164	139
CSbapl.1902	BAPLcs_chr1;BAPLcs_chr1	31716570;31720259	31716573;31720572	+;+	318	36	19	24	21	27	40
CSbapl.1904	BAPLcs_chr1;BAPLcs_chr1;BAPLcs_chr1;BAPLcs_chr1;BAPLcs_chr1;BAPLcs_chr1;BAPLcs_chr1;BAPLcs_chr1;BAPLcs_chr1;BAPLcs_chr1;BAPLcs_chr1;BAPLcs_chr1;BAPLcs_chr1;BAPLcs_chr1;BAPLcs_chr1;BAPLcs_chr1;BAPLcs_chr1;BAPLcs_chr1;BAPLcs_chr1;BAPLcs_chr1;BAPLcs_chr1;BAPLcs_chr1;BAPLcs_chr1;BAPLcs_chr1;BAPLcs_chr1;BAPLcs_chr1;BAPLcs_chr1;BAPLcs_chr1	31740525;31740525;31741944;31741944;31743544;31743544;31744621;31744621;31745578;31745578;31746903;31746903;31748271;31748271;31750704;31750704;31751673;31751673;31754232;31754232;31754883;31754883;31755841;31755841;31758275;31758275;31762655;31839467	31740830;31740830;31742062;31742062;31743669;31743669;31744714;31744714;31745688;31745688;31747062;31747062;31748423;31748423;31750826;31750826;31751800;31751800;31754379;31754379;31754928;31754928;31755978;31755978;31758386;31758386;31762846;31839775	-;-;-;-;-;-;-;-;-;-;-;-;-;-;-;-;-;-;-;-;-;-;-;-;-;-;-;-	2265	112	213	63	259	190	341
CSbapl.1906	BAPLcs_chr1;BAPLcs_chr1;BAPLcs_chr1;BAPLcs_chr1;BAPLcs_chr1;BAPLcs_chr1;BAPLcs_chr1;BAPLcs_chr1	31782028;31784170;31787139;31788005;31788731;31789130;31790346;31791268	31782256;31784305;31787260;31788102;31788825;31789275;31790432;31791335	+;+;+;+;+;+;+;+	981	20	143	16	25	21	4
CSbapl.1908	BAPLcs_chr1;BAPLcs_chr1;BAPLcs_chr1;BAPLcs_chr1;BAPLcs_chr1;BAPLcs_chr1;BAPLcs_chr1;BAPLcs_chr1;BAPLcs_chr1;BAPLcs_chr1;BAPLcs_chr1;BAPLcs_chr1;BAPLcs_chr1;BAPLcs_chr1;BAPLcs_chr1;BAPLcs_chr1;BAPLcs_chr1;BAPLcs_chr1;BAPLcs_chr1;BAPLcs_chr1;BAPLcs_chr1;BAPLcs_chr1;BAPLcs_chr1;BAPLcs_chr1;BAPLcs_chr1;BAPLcs_chr1;BAPLcs_chr1;BAPLcs_chr1;BAPLcs_chr1;BAPLcs_chr1;BAPLcs_chr1;BAPLcs_chr1;BAPLcs_chr1;BAP…	31796988;31796988;31796988;31796988;31796988;31796988;31796988;31811538;31811538;31811538;31811538;31811538;31811538;31811538;31823435;31823435;31823435;31823435;31823435;31823435;31823435;31824858;31824858;31824858;31824858;31824858;31824858;31824858;31827617;31827617;31827617;31827617;31827617;31827617;31827617;31828920;31828920;31828920;31828920;31828920;31828920;31828920;31829806;31829806;318…	31797207;31797207;31797207;31797207;31797207;31797207;31797207;31811676;31811676;31811676;31811676;31811676;31811676;31811676;31823556;31823556;31823556;31823556;31823556;31823556;31823556;31824955;31824955;31824955;31824955;31824955;31824955;31824955;31827711;31827711;31827711;31827711;31827711;31827711;31827711;31829056;31829056;31829056;31829056;31829056;31829056;31829056;31829892;31829892;318…	+;+;+;+;+;+;+;+;+;+;+;+;+;+;+;+;+;+;+;+;+;+;+;+;+;+;+;+;+;+;+;+;+;+;+;+;+;+;+;+;+;+;+;+;+;+;+;+;+;+;+;+;+;+;+;+	1064	52	92	28	106	109	64
CSbapl.1910	BAPLcs_chr1	31838608	31839051	-	444	0	0	0	6	0	5
CSbapl.1911	BAPLcs_chr1	31847236	31847871	-	636	0	0	4	1	2	8
CSbapl.1912	BAPLcs_chr1;BAPLcs_chr1;BAPLcs_chr1;BAPLcs_chr1;BAPLcs_chr1;BAPLcs_chr1;BAPLcs_chr1;BAPLcs_chr1;BAPLcs_chr1	31853688;31853688;31856007;31856007;31857740;31861754;31861754;31863362;31863362	31853799;31853799;31856079;31856079;31857805;31861887;31861887;31863573;31863573	+;+;+;+;+;+;+;+;+	597	73	116	72	6287	10011	11482
CSbapl.1913	BAPLcs_chr1;BAPLcs_chr1;BAPLcs_chr1;BAPLcs_chr1;BAPLcs_chr1;BAPLcs_chr1;BAPLcs_chr1;BAPLcs_chr1;BAPLcs_chr1;BAPLcs_chr1;BAPLcs_chr1;BAPLcs_chr1;BAPLcs_chr1;BAPLcs_chr1;BAPLcs_chr1;BAPLcs_chr1;BAPLcs_chr1;BAPLcs_chr1;BAPLcs_chr1;BAPLcs_chr1;BAPLcs_chr1;BAPLcs_chr1;BAPLcs_chr1;BAPLcs_chr1;BAPLcs_chr1;BAPLcs_chr1;BAPLcs_chr1;BAPLcs_chr1;BAPLcs_chr1	31870574;31870574;31871453;31871453;31872771;31872771;31873607;31873607;31878489;31878489;31879386;31879386;31883209;31883481;31883481;31885823;31885823;31896188;31896188;31897842;31897842;31898590;31898590;31900769;31900769;31903852;31903852;31905400;31905400	31870656;31870656;31871514;31871514;31872982;31872982;31873747;31873747;31878568;31878568;31879640;31879640;31883232;31883701;31883701;31885953;31885953;31896339;31896339;31898045;31898045;31898719;31898719;31900945;31900945;31904048;31904048;31905436;31905436	-;-;-;-;-;-;-;-;-;-;-;-;-;-;-;-;-;-;-;-;-;-;-;-;-;-;-;-;-	2106	72	75	43	193	241	147
CSbapl.1914	BAPLcs_chr1;BAPLcs_chr1;BAPLcs_chr1;BAPLcs_chr1;BAPLcs_chr1;BAPLcs_chr1;BAPLcs_chr1;BAPLcs_chr1;BAPLcs_chr1;BAPLcs_chr1;BAPLcs_chr1;BAPLcs_chr1;BAPLcs_chr1;BAPLcs_chr1;BAPLcs_chr1;BAPLcs_chr1;BAPLcs_chr1;BAPLcs_chr1;BAPLcs_chr1;BAPLcs_chr1;BAPLcs_chr1;BAPLcs_chr1;BAPLcs_chr1;BAPLcs_chr1;BAPLcs_chr1;BAPLcs_chr1;BAPLcs_chr1;BAPLcs_chr1;BAPLcs_chr1;BAPLcs_chr1;BAPLcs_chr1;BAPLcs_chr1;BAPLcs_chr1;BAP…	31912163;31913790;31914817;31921720;31921766;31922388;31922388;31925151;31925151;31926928;31926928;31927390;31927390;31929601;31929601;31930488;31930488;31931686;31931686;31933202;31933202;31933958;31933958;31947386;31947386;31949837;31949837;31952926;31952926;31954158;31954158;31955416;31955416;31956484;31956484;31957756;31959335;31960454;31963364;31967397;31973323;31978362;32013529;32015052;320…	31913016;31913920;31914943;31921819;31921819;31922536;31922536;31925391;31925391;31927035;31927035;31927453;31927453;31929702;31929702;31930619;31930619;31931772;31931772;31933377;31933377;31934092;31934092;31947579;31947579;31949936;31949936;31952982;31952982;31954294;31954294;31955513;31955513;31956640;31956644;31958035;31959454;31960599;31963442;31967526;31973496;31978501;32013669;32015233;320…	+;+;+;+;+;+;+;+;+;+;+;+;+;+;+;+;+;+;+;+;+;+;+;+;+;+;+;+;+;+;+;+;+;+;+;+;+;+;+;+;+;+;+;+;+;+;+;+;+;+;+;+;+;+;+;+;+;+;+;+;+;+;+;+;+;+;+;+;+;+;+;+;+;+;+;+;+;+;+;+;+;+;+;+;+;+;+;+;+;+;+;+;+;+;+;+;+;+;+;+;+;+;+;+;+;+;+;+;+;+;+;+;+;+;+;+;+;+;+;+;+;+;+;+;+;+;+;+;+;+;+;+;+;+;+;+;+;+;+;+;+;+;+;+;+;+;+;+;+;+;+;+;+;+;+;+;+;+;+;+;+;+;+;+;+;+;+;+;+;+;+;+;+;+;+;+;+;+;+;+;+;+;+	13741	646	1294	550	1821	1576	1824
CSbapl.1916	BAPLcs_chr1;BAPLcs_chr1;BAPLcs_chr1	31918282;31919724;31920309	31918694;31919937;31920506	-;-;-	825	1	0	0	14	3	1
CSbapl.1917	BAPLcs_chr1;BAPLcs_chr1;BAPLcs_chr1;BAPLcs_chr1;BAPLcs_chr1;BAPLcs_chr1;BAPLcs_chr1;BAPLcs_chr1;BAPLcs_chr1;BAPLcs_chr1;BAPLcs_chr1;BAPLcs_chr1;BAPLcs_chr1;BAPLcs_chr1;BAPLcs_chr1;BAPLcs_chr1;BAPLcs_chr1;BAPLcs_chr1;BAPLcs_chr1;BAPLcs_chr1;BAPLcs_chr1;BAPLcs_chr1;BAPLcs_chr1;BAPLcs_chr1;BAPLcs_chr1;BAPLcs_chr1;BAPLcs_chr1;BAPLcs_chr1;BAPLcs_chr1;BAPLcs_chr1;BAPLcs_chr1;BAPLcs_chr1;BAPLcs_chr1;BAP…	31994077;31995674;31997505;32011334;32013135;32132342;32132342;32132342;32132342;32132342;32132342;32132342;32132342;32133162;32133192;32133192;32133192;32133192;32133192;32133192;32133192;32134749;32134778;32134778;32134778;32134778;32134778;32134778;32134778;32134778;32136138;32136138;32136138;32136138;32136138;32136138;32136138;32136138;32136138;32137359;32137359;32137359;32137359;32137359;321…	31994107;31995814;31997617;32011402;32013209;32132443;32132443;32132443;32132443;32132443;32132443;32132443;32132443;32133277;32133277;32133277;32133277;32133277;32133277;32133277;32133277;32134841;32134841;32134841;32134841;32134841;32134841;32134841;32134841;32134841;32136383;32136383;32136383;32136383;32136383;32136383;32136383;32136383;32136383;32137460;32137460;32137460;32137460;32137460;321…	-;-;-;-;-;-;-;-;-;-;-;-;-;-;-;-;-;-;-;-;-;-;-;-;-;-;-;-;-;-;-;-;-;-;-;-;-;-;-;-;-;-;-;-;-;-;-;-;-;-;-;-;-;-;-;-;-;-;-;-;-;-;-;-;-;-;-;-;-;-;-;-;-;-;-;-;-;-;-;-;-;-;-;-;-;-;-;-;-;-;-;-;-;-;-;-;-;-;-;-;-;-;-;-;-;-;-;-;-;-;-;-;-;-;-;-;-;-;-;-;-;-;-;-;-;-;-;-;-;-;-;-;-;-;-;-;-;-;-;-;-;-;-;-;-;-;-;-;-;-;-;-;-;-;-;-;-;-;-;-;-;-;-;-;-;-;-;-;-;-;-;-;-;-;-;-;-;-;-;-;-;-;-;-;-;-;-;-;-;-;-;-;-;-;-;-;-;-;-;-…	11696	2125	2328	1401	1569	2520	2052
CSbapl.1919	BAPLcs_chr1;BAPLcs_chr1;BAPLcs_chr1;BAPLcs_chr1;BAPLcs_chr1;BAPLcs_chr1;BAPLcs_chr1;BAPLcs_chr1;BAPLcs_chr1;BAPLcs_chr1;BAPLcs_chr1;BAPLcs_chr1;BAPLcs_chr1;BAPLcs_chr1;BAPLcs_chr1;BAPLcs_chr1	32538596;32538596;32538596;32539123;32541100;32541100;32541100;32541724;32541724;32541724;32542658;32542658;32542658;32545134;32545276;32545276	32538979;32538878;32538878;32539174;32541201;32541201;32541201;32541911;32541911;32541911;32542720;32542720;32542720;32545190;32545401;32545401	+;+;+;+;+;+;+;+;+;+;+;+;+;+;+;+	972	317	959	97	46	202	184
CSbapl.1922	BAPLcs_chr1;BAPLcs_chr1;BAPLcs_chr1	32625492;32626673;32627516	32626170;32626832;32628251	-;-;-	1575	2	49	4	6	6	26
CSbapl.1923	BAPLcs_chr1;BAPLcs_chr1	32628519;32631222	32629987;32631237	-;-	1485	7	31	6	4	6	22
CSbapl.1921	BAPLcs_chr1	32646557	32646994	+	438	2	6	3	7	1	8
CSbapl.1924	BAPLcs_chr1;BAPLcs_chr1;BAPLcs_chr1;BAPLcs_chr1	32664124;32664843;32670398;32671559	32664309;32664922;32670484;32671658	+;+;+;+	453	3	4	4	0	0	1
CSbapl.1926	BAPLcs_chr1;BAPLcs_chr1;BAPLcs_chr1;BAPLcs_chr1;BAPLcs_chr1;BAPLcs_chr1;BAPLcs_chr1;BAPLcs_chr1;BAPLcs_chr1;BAPLcs_chr1;BAPLcs_chr1;BAPLcs_chr1;BAPLcs_chr1;BAPLcs_chr1;BAPLcs_chr1;BAPLcs_chr1;BAPLcs_chr1;BAPLcs_chr1;BAPLcs_chr1;BAPLcs_chr1;BAPLcs_chr1;BAPLcs_chr1;BAPLcs_chr1;BAPLcs_chr1;BAPLcs_chr1;BAPLcs_chr1;BAPLcs_chr1;BAPLcs_chr1;BAPLcs_chr1;BAPLcs_chr1;BAPLcs_chr1;BAPLcs_chr1;BAPLcs_chr1;BAP…	32680766;32680766;32680766;32689119;32689119;32689119;32693817;32693817;32693817;32694594;32694594;32694594;32696250;32696250;32696250;32698092;32698092;32698092;32701607;32701607;32701607;32702212;32702212;32702212;32704808;32704808;32704808;32716191;32716191;32716191;32718527;32718527;32718527;32721292;32721292;32721292;32722525;32751054;32751054;32751940;32751940;32752929;32752929;32754076;327…	32680888;32680888;32680888;32689233;32689233;32689233;32693884;32693884;32693884;32694713;32694713;32694713;32696344;32696344;32696344;32698257;32698257;32698257;32701672;32701672;32701672;32702282;32702282;32702282;32704967;32704967;32704967;32716277;32716277;32716277;32718704;32718704;32718704;32721388;32721388;32721388;32722573;32751130;32751130;32751970;32751970;32753003;32753003;32754391;327…	+;+;+;+;+;+;+;+;+;+;+;+;+;+;+;+;+;+;+;+;+;+;+;+;+;+;+;+;+;+;+;+;+;+;+;+;+;+;+;+;+;+;+;+;+;+;+;+;+	2568	46	39	25	41	128	62
CSbapl.1929	BAPLcs_chr1;BAPLcs_chr1;BAPLcs_chr1;BAPLcs_chr1;BAPLcs_chr1;BAPLcs_chr1	32774025;32780602;32781009;32781544;32782267;32787767	32774400;32780737;32781083;32781689;32782433;32787802	-;-;-;-;-;-	936	29	75	27	32	52	29
CSbapl.1931	BAPLcs_chr1;BAPLcs_chr1;BAPLcs_chr1;BAPLcs_chr1;BAPLcs_chr1;BAPLcs_chr1;BAPLcs_chr1;BAPLcs_chr1;BAPLcs_chr1;BAPLcs_chr1;BAPLcs_chr1;BAPLcs_chr1;BAPLcs_chr1;BAPLcs_chr1;BAPLcs_chr1;BAPLcs_chr1;BAPLcs_chr1;BAPLcs_chr1;BAPLcs_chr1;BAPLcs_chr1;BAPLcs_chr1;BAPLcs_chr1;BAPLcs_chr1	32818069;32836596;32838065;32838846;32839493;32840262;32841027;32842447;32843346;32845239;32845718;32847628;32848872;32850098;32851059;32852670;32855250;32855919;32856902;32858432;32859050;32860351;32863377	32818432;32836808;32838289;32839064;32839717;32840600;32841257;32842665;32844305;32845451;32845942;32847849;32849093;32850310;32851298;32852888;32855474;32856131;32857129;32858638;32859280;32860572;32863630	+;+;+;+;+;+;+;+;+;+;+;+;+;+;+;+;+;+;+;+;+;+;+	6129	2	6	5	0	2	10
CSbapl.1933	BAPLcs_chr1	32823580	32823915	+	336	0	0	0	5	9	4
CSbapl.1935	BAPLcs_chr1;BAPLcs_chr1	32865752;32868320	32866817;32868378	-;-	1125	0	2	2	0	0	2
CSbapl.1936	BAPLcs_chr1;BAPLcs_chr1	32870094;32873849	32870436;32873973	+;+	468	3	0	1	12	2	10
CSbapl.1938	BAPLcs_chr1;BAPLcs_chr1;BAPLcs_chr1;BAPLcs_chr1	32882343;32886583;32888266;32888810	32882669;32886648;32888496;32888980	-;-;-;-	795	65	53	106	30	34	48
CSbapl.1939	BAPLcs_chr1;BAPLcs_chr1;BAPLcs_chr1;BAPLcs_chr1;BAPLcs_chr1;BAPLcs_chr1;BAPLcs_chr1;BAPLcs_chr1;BAPLcs_chr1;BAPLcs_chr1;BAPLcs_chr1	32894692;32898095;32899701;32908149;32909035;32910024;32910563;32911171;32911241;32913330;32913330	32894818;32898300;32899891;32908225;32909065;32910098;32910702;32911486;32911486;32914003;32914003	+;+;+;+;+;+;+;+;+;+;+	1837	1	12	0	0	3	0
CSbapl.1944	BAPLcs_chr1;BAPLcs_chr1;BAPLcs_chr1;BAPLcs_chr1;BAPLcs_chr1;BAPLcs_chr1;BAPLcs_chr1;BAPLcs_chr1;BAPLcs_chr1;BAPLcs_chr1;BAPLcs_chr1	32941742;32948267;32948675;32949209;32949932;32954597;32955059;32956821;32958738;32959290;32961618	32942117;32948402;32948749;32949354;32950098;32954761;32955522;32956934;32958792;32959367;32964401	-;-;-;-;-;-;-;-;-;-;-	4560	397	446	157	284	277	380
CSbapl.1950	BAPLcs_chr1;BAPLcs_chr1;BAPLcs_chr1;BAPLcs_chr1;BAPLcs_chr1;BAPLcs_chr1	32998158;33003778;33005168;33007591;33008902;33024795	32999494;33003867;33005289;33007964;33009015;33024833	-;-;-;-;-;-	2076	0	5	0	44	2	32
CSbapl.1953	BAPLcs_chr1;BAPLcs_chr1;BAPLcs_chr1;BAPLcs_chr1;BAPLcs_chr1;BAPLcs_chr1;BAPLcs_chr1;BAPLcs_chr1;BAPLcs_chr1;BAPLcs_chr1;BAPLcs_chr1;BAPLcs_chr1;BAPLcs_chr1;BAPLcs_chr1;BAPLcs_chr1;BAPLcs_chr1;BAPLcs_chr1;BAPLcs_chr1;BAPLcs_chr1;BAPLcs_chr1;BAPLcs_chr1;BAPLcs_chr1;BAPLcs_chr1;BAPLcs_chr1;BAPLcs_chr1	33030572;33031741;33031745;33034435;33034435;33036511;33036511;33047653;33047653;33050347;33050347;33050956;33050956;33054302;33054302;33056234;33056234;33057852;33057852;33058679;33058679;33063264;33063264;33071547;33071547	33030620;33031841;33031841;33034612;33034612;33036597;33036597;33047812;33047812;33050417;33050417;33051021;33051021;33054467;33054467;33056328;33056328;33057971;33057971;33058746;33058746;33063378;33063378;33071669;33071669	-;-;-;-;-;-;-;-;-;-;-;-;-;-;-;-;-;-;-;-;-;-;-;-;-	1399	56	64	45	113	96	172
CSbapl.1954	BAPLcs_chr1;BAPLcs_chr1;BAPLcs_chr1;BAPLcs_chr1;BAPLcs_chr1;BAPLcs_chr1;BAPLcs_chr1	33080772;33081944;33085790;33087502;33088115;33089183;33090764	33080871;33082030;33085882;33087581;33088333;33089312;33090903	-;-;-;-;-;-;-	849	2	2	0	0	0	0
CSbapl.1955	BAPLcs_chr1;BAPLcs_chr1;BAPLcs_chr1	33105786;33105786;33105786	33106223;33106223;33106223	-;-;-	438	11	12	3	6	2	5
CSbapl.1957	BAPLcs_chr1;BAPLcs_chr1;BAPLcs_chr1	33124186;33126132;33126794	33125449;33126291;33127472	+;+;+	2103	16	23	10	10	23	26
CSbapl.1958	BAPLcs_chr1;BAPLcs_chr1;BAPLcs_chr1;BAPLcs_chr1;BAPLcs_chr1;BAPLcs_chr1;BAPLcs_chr1;BAPLcs_chr1;BAPLcs_chr1;BAPLcs_chr1;BAPLcs_chr1;BAPLcs_chr1;BAPLcs_chr1;BAPLcs_chr1;BAPLcs_chr1	33131096;33133541;33137902;33138848;33141433;33143916;33146272;33147600;33149696;33151332;33152985;33157273;33158198;33159513;33171837	33131318;33133668;33138009;33138925;33141503;33144096;33146448;33147719;33149977;33151431;33153169;33157416;33158292;33159613;33171973	+;+;+;+;+;+;+;+;+;+;+;+;+;+;+	2130	86	80	115	81	227	185
CSbapl.1959	BAPLcs_chr1;BAPLcs_chr1;BAPLcs_chr1;BAPLcs_chr1	33179323;33183510;33187417;33193524	33179705;33183593;33187524;33195333	-;-;-;-	2385	10	8	1	2	4	0
CSbapl.1960	BAPLcs_chr1;BAPLcs_chr1;BAPLcs_chr1;BAPLcs_chr1;BAPLcs_chr1;BAPLcs_chr1;BAPLcs_chr1;BAPLcs_chr1;BAPLcs_chr1;BAPLcs_chr1;BAPLcs_chr1;BAPLcs_chr1;BAPLcs_chr1;BAPLcs_chr1	33205303;33205303;33208797;33208797;33213154;33213154;33219206;33219206;33223487;33223487;33225668;33225668;33228672;33228672	33205442;33205442;33208931;33208931;33213265;33213265;33219506;33219506;33223643;33223643;33225814;33225814;33229035;33229035	-;-;-;-;-;-;-;-;-;-;-;-;-;-	1356	6	20	15	25	11	13
CSbapl.1962	BAPLcs_chr1;BAPLcs_chr1;BAPLcs_chr1;BAPLcs_chr1;BAPLcs_chr1;BAPLcs_chr1	33229517;33232883;33234862;33235554;33236811;33238569	33229614;33232948;33235085;33235881;33236901;33238676	+;+;+;+;+;+	915	14	24	9	66	88	58
CSbapl.1964	BAPLcs_chr1;BAPLcs_chr1;BAPLcs_chr1;BAPLcs_chr1	33243723;33245149;33250623;33257125	33244613;33245228;33250676;33257188	-;-;-;-	1089	5	16	17	5	2	10
CSbapl.1967	BAPLcs_chr1;BAPLcs_chr1	33278478;33278478	33279497;33279497	-;-	1020	2	4	2	2	5	1
CSbapl.1968	BAPLcs_chr1;BAPLcs_chr1;BAPLcs_chr1;BAPLcs_chr1;BAPLcs_chr1;BAPLcs_chr1;BAPLcs_chr1;BAPLcs_chr1;BAPLcs_chr1;BAPLcs_chr1;BAPLcs_chr1;BAPLcs_chr1;BAPLcs_chr1;BAPLcs_chr1;BAPLcs_chr1;BAPLcs_chr1;BAPLcs_chr1;BAPLcs_chr1;BAPLcs_chr1;BAPLcs_chr1;BAPLcs_chr1;BAPLcs_chr1;BAPLcs_chr1;BAPLcs_chr1;BAPLcs_chr1;BAPLcs_chr1;BAPLcs_chr1;BAPLcs_chr1;BAPLcs_chr1;BAPLcs_chr1;BAPLcs_chr1;BAPLcs_chr1;BAPLcs_chr1;BAP…	33398148;33398202;33412147;33412147;33413484;33413484;33417211;33417211;33418022;33418022;33420386;33420386;33420643;33420643;33420643;33463690;33465756;33467350;33468865;33470202;33479787;33553626;33553695;33553695;33553695;33555855;33555855;33555855;33555855;33557770;33557770;33557770;33557770;33562787;33562787;33562787;33562787;33563550;33563550;33563550;33563550;33567621;33567621;33567621;335…	33398286;33398286;33412184;33412184;33413540;33413540;33417546;33417546;33418811;33418811;33426015;33426015;33426015;33426015;33426015;33463779;33465896;33467488;33468977;33470322;33479887;33553779;33553779;33553779;33553779;33555892;33555892;33555892;33555892;33557826;33557826;33557826;33557826;33563122;33563122;33563122;33563122;33564309;33564309;33564309;33564309;33573241;33573241;33573241;335…	+;+;+;+;+;+;+;+;+;+;+;+;+;+;+;+;+;+;+;+;+;+;+;+;+;+;+;+;+;+;+;+;+;+;+;+;+;+;+;+;+;+;+;+;+;+;+;+;+;+;+;+;+;+;+;+;+;+;+;+;+;+;+;+;+;+;+;+;+;+;+;+;+;+;+;+;+;+	20925	452	449	577	5918	5676	7778
CSbapl.1969	BAPLcs_chr1;BAPLcs_chr1;BAPLcs_chr1;BAPLcs_chr1;BAPLcs_chr1;BAPLcs_chr1;BAPLcs_chr1;BAPLcs_chr1;BAPLcs_chr1;BAPLcs_chr1;BAPLcs_chr1;BAPLcs_chr1;BAPLcs_chr1;BAPLcs_chr1;BAPLcs_chr1;BAPLcs_chr1;BAPLcs_chr1;BAPLcs_chr1;BAPLcs_chr1;BAPLcs_chr1;BAPLcs_chr1;BAPLcs_chr1;BAPLcs_chr1;BAPLcs_chr1;BAPLcs_chr1;BAPLcs_chr1;BAPLcs_chr1;BAPLcs_chr1;BAPLcs_chr1;BAPLcs_chr1;BAPLcs_chr1;BAPLcs_chr1;BAPLcs_chr1;BAP…	33319725;33320033;33321374;33324258;33325197;33326630;33329560;33333353;33335541;33337086;33337820;33338826;33339495;33341196;33343624;33345547;33347680;33349869;33351935;33353386;33356656;33358994;33360076;33361521;33363193;33366913;33368189;33369363;33375530;33437414;33439200;33441103;33442085;33445477;33447400;33449262;33450291;33452380;33454948;33461605;33583327;33585100;33588335;33589318;335…	33319836;33320227;33321540;33324416;33325340;33326731;33329686;33333552;33335851;33337323;33337991;33338910;33339666;33341363;33343800;33345673;33347746;33349953;33352081;33353523;33356857;33359215;33360201;33361582;33363294;33367041;33368314;33369539;33375586;33437528;33439411;33441225;33442187;33445599;33447624;33449395;33450409;33452404;33455057;33461686;33583441;33585311;33588457;33589420;335…	-;-;-;-;-;-;-;-;-;-;-;-;-;-;-;-;-;-;-;-;-;-;-;-;-;-;-;-;-;-;-;-;-;-;-;-;-;-;-;-;-;-;-;-;-;-;-;-;-;-;-;-;-	7242	575	753	435	807	1413	1301
CSbapl.1970	BAPLcs_chr1;BAPLcs_chr1;BAPLcs_chr1	33787090;33797340;33798293	33787566;33797403;33798762	+;+;+	1011	37	52	26	1036	904	1449
CSbapl.1972	BAPLcs_chr1;BAPLcs_chr1;BAPLcs_chr1;BAPLcs_chr1;BAPLcs_chr1;BAPLcs_chr1;BAPLcs_chr1;BAPLcs_chr1;BAPLcs_chr1;BAPLcs_chr1;BAPLcs_chr1;BAPLcs_chr1;BAPLcs_chr1;BAPLcs_chr1	33817550;33817550;33818548;33818548;33819292;33819292;33820321;33820321;33822780;33822780;33823383;33823383;33824407;33883080	33817631;33817631;33818616;33818616;33819419;33819419;33820467;33820467;33822890;33822890;33823438;33823400;33824512;33883496	-;-;-;-;-;-;-;-;-;-;-;-;-;-	1116	292	390	223	176	296	320
CSbapl.1973	BAPLcs_chr1;BAPLcs_chr1	33841416;33842025	33841466;33842315	+;+	342	0	0	0	4	0	2
CSbapl.1975	BAPLcs_chr1;BAPLcs_chr1;BAPLcs_chr1;BAPLcs_chr1;BAPLcs_chr1;BAPLcs_chr1;BAPLcs_chr1;BAPLcs_chr1;BAPLcs_chr1;BAPLcs_chr1	33894004;33895421;33896364;33897971;33898805;33901716;33903068;33904271;33905861;33908587	33894123;33895513;33896444;33898048;33898948;33901792;33903155;33904329;33905930;33908664	-;-;-;-;-;-;-;-;-;-	888	52	63	53	144	93	154
CSbapl.1978	BAPLcs_chr1;BAPLcs_chr1	33935815;33936777	33935944;33936958	+;+	312	4	11	10	1	0	2
CSbapl.1979	BAPLcs_chr1;BAPLcs_chr1;BAPLcs_chr1;BAPLcs_chr1;BAPLcs_chr1	33946802;33955750;33969884;33975345;33975345	33946893;33955908;33969909;33975729;33975729	+;+;+;+;+	662	52	101	19	2	41	24
CSbapl.1981	BAPLcs_chr1;BAPLcs_chr1;BAPLcs_chr1;BAPLcs_chr1;BAPLcs_chr1;BAPLcs_chr1;BAPLcs_chr1;BAPLcs_chr1;BAPLcs_chr1;BAPLcs_chr1;BAPLcs_chr1;BAPLcs_chr1;BAPLcs_chr1;BAPLcs_chr1;BAPLcs_chr1;BAPLcs_chr1;BAPLcs_chr1;BAPLcs_chr1;BAPLcs_chr1;BAPLcs_chr1;BAPLcs_chr1;BAPLcs_chr1;BAPLcs_chr1;BAPLcs_chr1;BAPLcs_chr1;BAPLcs_chr1;BAPLcs_chr1;BAPLcs_chr1;BAPLcs_chr1;BAPLcs_chr1;BAPLcs_chr1;BAPLcs_chr1;BAPLcs_chr1;BAP…	34088952;34088952;34088952;34088952;34095124;34095124;34095124;34095124;34100052;34100052;34100052;34100052;34102658;34102658;34102658;34102658;34106710;34106710;34106710;34106710;34107778;34107778;34107778;34107778;34108398;34108398;34108398;34108398;34109363;34109363;34109363;34109363;34109849;34109858;34109858;34109858;34109858;34119070;34119070;34119070;34119070;34119070;34119514;34119514;341…	34089057;34089057;34089057;34089057;34095256;34095256;34095256;34095256;34100117;34100117;34100117;34100117;34102790;34102790;34102790;34102790;34106775;34106775;34106775;34106775;34107856;34107856;34107856;34107856;34108557;34108557;34108557;34108557;34109579;34109579;34109579;34109579;34109992;34109992;34109992;34109992;34109992;34119161;34119161;34119161;34119161;34119161;34119607;34119607;341…	-;-;-;-;-;-;-;-;-;-;-;-;-;-;-;-;-;-;-;-;-;-;-;-;-;-;-;-;-;-;-;-;-;-;-;-;-;-;-;-;-;-;-;-;-;-;-;-;-;-;-;-;-;-;-;-;-;-;-;-;-;-;-;-;-;-;-;-;-;-;-;-;-;-;-;-;-;-;-;-;-;-;-;-;-;-;-;-;-;-;-;-;-;-;-;-;-;-;-;-;-;-;-;-;-;-;-;-;-;-;-;-;-;-;-;-;-;-;-;-;-;-;-;-;-;-;-;-;-;-;-;-;-;-;-;-;-;-;-;-;-;-;-;-;-;-;-;-;-;-;-;-;-;-;-;-;-;-;-;-;-;-;-;-;-;-;-;-;-;-;-;-;-;-;-;-;-;-;-;-;-;-;-;-;-;-;-;-;-;-;-;-;-;-;-;-;-;-;-;-…	20315	4574	6281	2329	4550	7347	7302
CSbapl.1982	BAPLcs_chr1;BAPLcs_chr1;BAPLcs_chr1;BAPLcs_chr1;BAPLcs_chr1;BAPLcs_chr1;BAPLcs_chr1;BAPLcs_chr1;BAPLcs_chr1;BAPLcs_chr1;BAPLcs_chr1;BAPLcs_chr1;BAPLcs_chr1;BAPLcs_chr1;BAPLcs_chr1;BAPLcs_chr1;BAPLcs_chr1;BAPLcs_chr1;BAPLcs_chr1;BAPLcs_chr1;BAPLcs_chr1;BAPLcs_chr1;BAPLcs_chr1;BAPLcs_chr1;BAPLcs_chr1;BAPLcs_chr1;BAPLcs_chr1;BAPLcs_chr1;BAPLcs_chr1;BAPLcs_chr1;BAPLcs_chr1;BAPLcs_chr1;BAPLcs_chr1;BAP…	34359859;34476567;34481496;34483733;34508443;34508443;34511726;34511726;34512481;34512481;34513402;34513402;34513829;34513829;34515609;34515609;34516410;34516410;34521735;34521735;34522480;34522480;34525879;34528537;34673300;34676414;34676414;34676414;34676414;34676414;34676414;34676414;34676414;34676414;34676414;34677191;34789919;34794325;34796561;34819480;34823517;34824274;34825178;34825600;348…	34360905;34476878;34481721;34484208;34508513;34508513;34511918;34511918;34512649;34512649;34513510;34513510;34513943;34513943;34515658;34515658;34516544;34516544;34521833;34521833;34522615;34522607;34526041;34528729;34674346;34679800;34679800;34679800;34679800;34679800;34679800;34679800;34679800;34679800;34679800;34679800;34790230;34794550;34797036;34819550;34823709;34824442;34825286;34825714;348…	+;+;+;+;+;+;+;+;+;+;+;+;+;+;+;+;+;+;+;+;+;+;+;+;+;+;+;+;+;+;+;+;+;+;+;+;+;+;+;+;+;+;+;+;+;+;+;+;+;+	10367	253	413	108	642	369	370
CSbapl.1983	BAPLcs_chr1	34852976	34854292	-	1317	0	0	0	2	0	0
CSbapl.1984	BAPLcs_chr1	34857439	34858386	-	948	0	0	0	4	0	1
CSbapl.1987	BAPLcs_chr1;BAPLcs_chr1	34875643;34876621	34876517;34877401	-;-	1656	4	1	13	5	2	2
CSbapl.1994	BAPLcs_chr1;BAPLcs_chr1;BAPLcs_chr1;BAPLcs_chr1	34901035;34902816;34903386;34905929	34901612;34902959;34903550;34906508	-;-;-;-	1467	59	61	4	15	13	20
CSbapl.1995	BAPLcs_chr1;BAPLcs_chr1;BAPLcs_chr1;BAPLcs_chr1	34911012;34913070;34914008;34915258	34911681;34913246;34914145;34915838	+;+;+;+	1566	139	206	8	16	23	32
CSbapl.1997	BAPLcs_chr1;BAPLcs_chr1;BAPLcs_chr1	34934410;34939608;34940499	34934749;34939751;34941136	+;+;+	1122	19	27	8	2	5	7
CSbapl.2001	BAPLcs_chr1;BAPLcs_chr1;BAPLcs_chr1;BAPLcs_chr1;BAPLcs_chr1;BAPLcs_chr1;BAPLcs_chr1;BAPLcs_chr1;BAPLcs_chr1;BAPLcs_chr1;BAPLcs_chr1;BAPLcs_chr1;BAPLcs_chr1;BAPLcs_chr1;BAPLcs_chr1;BAPLcs_chr1;BAPLcs_chr1;BAPLcs_chr1;BAPLcs_chr1;BAPLcs_chr1;BAPLcs_chr1;BAPLcs_chr1;BAPLcs_chr1;BAPLcs_chr1;BAPLcs_chr1;BAPLcs_chr1;BAPLcs_chr1;BAPLcs_chr1;BAPLcs_chr1;BAPLcs_chr1;BAPLcs_chr1;BAPLcs_chr1;BAPLcs_chr1;BAP…	34997364;34997364;34997364;34998063;34998063;34998063;35000213;35000213;35000213;35004827;35004827;35004827;35005843;35005843;35005843;35011091;35011091;35011091;35014870;35014870;35014870;35016142;35016142;35016142;35016666;35016666;35016666;35017396;35018231;35018231;35019055;35019055;35020216;35020216;35020593;35020593;35021527;35021527;35022203;35022203;35026085;35026085	34997456;34997456;34997456;34998179;34998179;34998179;35000344;35000344;35000344;35005058;35005058;35005058;35005916;35005916;35005916;35011198;35011198;35011198;35014974;35014974;35014974;35016207;35016207;35016207;35016827;35016827;35016827;35017428;35018285;35018285;35019167;35019167;35020253;35020253;35020724;35020724;35021642;35021642;35022342;35022342;35026237;35026249	-;-;-;-;-;-;-;-;-;-;-;-;-;-;-;-;-;-;-;-;-;-;-;-;-;-;-;-;-;-;-;-;-;-;-;-;-;-;-;-;-;-	1881	1214	867	945	637	864	1501
CSbapl.2002	BAPLcs_chr1;BAPLcs_chr1;BAPLcs_chr1;BAPLcs_chr1;BAPLcs_chr1;BAPLcs_chr1;BAPLcs_chr1;BAPLcs_chr1;BAPLcs_chr1;BAPLcs_chr1;BAPLcs_chr1;BAPLcs_chr1;BAPLcs_chr1;BAPLcs_chr1;BAPLcs_chr1;BAPLcs_chr1;BAPLcs_chr1;BAPLcs_chr1;BAPLcs_chr1;BAPLcs_chr1;BAPLcs_chr1;BAPLcs_chr1;BAPLcs_chr1;BAPLcs_chr1;BAPLcs_chr1;BAPLcs_chr1;BAPLcs_chr1;BAPLcs_chr1;BAPLcs_chr1;BAPLcs_chr1;BAPLcs_chr1;BAPLcs_chr1;BAPLcs_chr1;BAP…	35041525;35041525;35042075;35042075;35043114;35043114;35043847;35043847;35052089;35052089;35052529;35052529;35052686;35053734;35053734;35054314;35054314;35054596;35054596;35055413;35055413;35055840;35055840;35056288;35056288;35057378;35057378;35057759;35057830;35057830;35058336;35058336;35058848;35058848;35059214;35059214;35059960;35059960;35060402;35060402;35061540;35063481;35064108;35069230;350…	35041619;35041619;35042180;35042180;35043377;35043377;35043946;35043946;35052231;35052231;35052666;35052666;35053285;35053925;35053925;35054402;35054402;35054770;35054770;35055558;35055558;35055978;35055978;35056461;35056461;35057535;35057535;35058067;35058068;35058068;35058454;35058454;35058973;35058973;35059471;35059471;35060094;35060094;35060549;35060518;35061661;35063573;35064225;35069416;350…	-;-;-;-;-;-;-;-;-;-;-;-;-;-;-;-;-;-;-;-;-;-;-;-;-;-;-;-;-;-;-;-;-;-;-;-;-;-;-;-;-;-;-;-;-;-	4430	79	152	35	53	99	54
CSbapl.2003	BAPLcs_chr1;BAPLcs_chr1;BAPLcs_chr1;BAPLcs_chr1;BAPLcs_chr1;BAPLcs_chr1;BAPLcs_chr1;BAPLcs_chr1;BAPLcs_chr1;BAPLcs_chr1;BAPLcs_chr1;BAPLcs_chr1;BAPLcs_chr1;BAPLcs_chr1;BAPLcs_chr1;BAPLcs_chr1;BAPLcs_chr1;BAPLcs_chr1;BAPLcs_chr1;BAPLcs_chr1;BAPLcs_chr1;BAPLcs_chr1;BAPLcs_chr1;BAPLcs_chr1;BAPLcs_chr1;BAPLcs_chr1;BAPLcs_chr1;BAPLcs_chr1;BAPLcs_chr1;BAPLcs_chr1;BAPLcs_chr1;BAPLcs_chr1;BAPLcs_chr1;BAP…	35103999;35103999;35105536;35105536;35106853;35106853;35107601;35107601;35115156;35115156;35117550;35118152;35120258;35120258;35120869;35120869;35121511;35121511;35122054;35122054;35123343;35123343;35124467;35124467;35124903;35124903;35125515;35125515;35133815;35133815;35135284;35135284;35137469;35137469;35138605;35138605	35104092;35104092;35105693;35105693;35107011;35107011;35107730;35107730;35115249;35115249;35117634;35118236;35120470;35120470;35120991;35120991;35121788;35121788;35122189;35122189;35123476;35123476;35124569;35124569;35125034;35125034;35125707;35125707;35133895;35133895;35135456;35135456;35137571;35137571;35138621;35138621	-;-;-;-;-;-;-;-;-;-;-;-;-;-;-;-;-;-;-;-;-;-;-;-;-;-;-;-;-;-;-;-;-;-;-;-	2491	2897	5970	1970	6404	9544	12307
CSbapl.2004	BAPLcs_chr1;BAPLcs_chr1	35147567;35148640	35147687;35148821	+;+	303	0	0	0	0	2	0
CSbapl.2008	BAPLcs_chr1;BAPLcs_chr1;BAPLcs_chr1;BAPLcs_chr1	35260718;35260718;35263108;35263108	35260770;35260770;35263774;35263774	+;+;+;+	720	6	112	13	2	18	4
CSbapl.2011	BAPLcs_chr1;BAPLcs_chr1;BAPLcs_chr1;BAPLcs_chr1;BAPLcs_chr1;BAPLcs_chr1;BAPLcs_chr1;BAPLcs_chr1;BAPLcs_chr1;BAPLcs_chr1;BAPLcs_chr1;BAPLcs_chr1	35295399;35298063;35298941;35299610;35300813;35301728;35302510;35304306;35304977;35306059;35307518;35313203	35295528;35298178;35299012;35299696;35300941;35301833;35302637;35304415;35305076;35306170;35307715;35313564	+;+;+;+;+;+;+;+;+;+;+;+	1650	112	117	158	132	168	187
CSbapl.2013	BAPLcs_chr1;BAPLcs_chr1;BAPLcs_chr1;BAPLcs_chr1;BAPLcs_chr1;BAPLcs_chr1;BAPLcs_chr1;BAPLcs_chr1;BAPLcs_chr1;BAPLcs_chr1;BAPLcs_chr1;BAPLcs_chr1	35318212;35318765;35318863;35319806;35319806;35329167;35329167;35329981;35329981;35340853;35340853;35405277	35318303;35319013;35319013;35319916;35319916;35329514;35329514;35330142;35330142;35340927;35340927;35406110	-;-;-;-;-;-;-;-;-;-;-;-	1871	3568	6119	1960	4982	7437	7945
CSbapl.2014	BAPLcs_chr1	35390014	35391732	+	1719	40	35	37	97	60	139
CSbapl.2015	BAPLcs_chr1;BAPLcs_chr1;BAPLcs_chr1;BAPLcs_chr1;BAPLcs_chr1;BAPLcs_chr1;BAPLcs_chr1;BAPLcs_chr1;BAPLcs_chr1	35410069;35411205;35413041;35414948;35416940;35420112;35421103;35423260;35424897	35410579;35411350;35413223;35415034;35417138;35420264;35421224;35423419;35425045	+;+;+;+;+;+;+;+;+	1710	42	61	55	69	57	100
CSbapl.2016	BAPLcs_chr1;BAPLcs_chr1;BAPLcs_chr1;BAPLcs_chr1;BAPLcs_chr1;BAPLcs_chr1;BAPLcs_chr1	35433616;35434425;35434470;35437732;35437732;35438843;35438843	35433639;35434617;35434617;35437884;35437884;35438883;35438883	-;-;-;-;-;-;-	411	19321	15773	15519	12949	17592	17196
CSbapl.2017	BAPLcs_chr1;BAPLcs_chr1;BAPLcs_chr1;BAPLcs_chr1;BAPLcs_chr1;BAPLcs_chr1;BAPLcs_chr1;BAPLcs_chr1;BAPLcs_chr1;BAPLcs_chr1;BAPLcs_chr1;BAPLcs_chr1;BAPLcs_chr1;BAPLcs_chr1;BAPLcs_chr1;BAPLcs_chr1;BAPLcs_chr1;BAPLcs_chr1	35441030;35441030;35444575;35444575;35445401;35445401;35446044;35446044;35447199;35447199;35449961;35449961;35451283;35451283;35451979;35451979;35455054;35455054	35441075;35441075;35444705;35444705;35445645;35445645;35446172;35446172;35447442;35447442;35450035;35450035;35451414;35451414;35452080;35452080;35455164;35455164	+;+;+;+;+;+;+;+;+;+;+;+;+;+;+;+;+;+	1215	256	456	176	305	769	1579
CSbapl.2018	BAPLcs_chr1;BAPLcs_chr1;BAPLcs_chr1;BAPLcs_chr1;BAPLcs_chr1;BAPLcs_chr1;BAPLcs_chr1;BAPLcs_chr1;BAPLcs_chr1;BAPLcs_chr1;BAPLcs_chr1;BAPLcs_chr1;BAPLcs_chr1;BAPLcs_chr1;BAPLcs_chr1;BAPLcs_chr1;BAPLcs_chr1;BAPLcs_chr1	35467857;35467857;35471105;35471105;35471771;35471771;35473151;35473151;35475320;35475320;35476624;35476624;35477148;35477148;35479109;35479109;35484267;35484267	35467967;35467967;35471206;35471206;35471902;35471902;35473225;35473225;35475563;35475563;35476752;35476752;35477392;35477392;35479239;35479239;35484312;35484312	-;-;-;-;-;-;-;-;-;-;-;-;-;-;-;-;-;-	1215	392	550	294	1547	1047	2310
CSbapl.2019	BAPLcs_chr1;BAPLcs_chr1;BAPLcs_chr1;BAPLcs_chr1;BAPLcs_chr1;BAPLcs_chr1;BAPLcs_chr1;BAPLcs_chr1;BAPLcs_chr1;BAPLcs_chr1;BAPLcs_chr1	35485740;35485740;35485740;35486738;35486738;35486738;35489942;35489942;35489946;35490935;35490935	35485780;35485780;35485780;35486890;35486894;35486890;35490134;35490089;35490089;35490958;35490958	+;+;+;+;+;+;+;+;+;+;+	415	7042	7582	4024	3484	11077	16413
CSbapl.2020	BAPLcs_chr1;BAPLcs_chr1;BAPLcs_chr1;BAPLcs_chr1;BAPLcs_chr1;BAPLcs_chr1;BAPLcs_chr1;BAPLcs_chr1;BAPLcs_chr1	35498052;35499685;35501877;35502837;35506700;35508726;35510299;35512476;35513214	35498200;35499844;35501998;35502989;35506898;35508884;35510481;35512621;35513724	-;-;-;-;-;-;-;-;-	1782	105	50	83	65	191	122
CSbapl.2022	BAPLcs_chr1;BAPLcs_chr1	35531187;35568044	35532035;35568121	-;-	927	25	19	28	52	53	50
CSbapl.2025	BAPLcs_chr1;BAPLcs_chr1;BAPLcs_chr1;BAPLcs_chr1;BAPLcs_chr1;BAPLcs_chr1	35607725;35607756;35607776;35607889;35608745;35608932	35608649;35607823;35608782;35609551;35609550;35609550	-;-;-;-;-;-	1827	0	0	0	6	1	1
CSbapl.2029	BAPLcs_chr1;BAPLcs_chr1;BAPLcs_chr1;BAPLcs_chr1;BAPLcs_chr1;BAPLcs_chr1;BAPLcs_chr1;BAPLcs_chr1;BAPLcs_chr1;BAPLcs_chr1;BAPLcs_chr1;BAPLcs_chr1;BAPLcs_chr1;BAPLcs_chr1;BAPLcs_chr1;BAPLcs_chr1;BAPLcs_chr1;BAPLcs_chr1;BAPLcs_chr1;BAPLcs_chr1;BAPLcs_chr1;BAPLcs_chr1;BAPLcs_chr1;BAPLcs_chr1;BAPLcs_chr1;BAPLcs_chr1;BAPLcs_chr1;BAPLcs_chr1;BAPLcs_chr1	35658091;35658091;35659185;35659185;35660104;35660104;35660787;35660787;35661084;35661537;35661537;35661537;35664667;35664667;35664667;35667312;35667312;35667312;35668050;35668050;35668050;35669582;35669582;35669582;35672364;35672364;35672364;35674190;35674190	35658280;35658280;35659330;35659330;35660169;35660169;35660908;35660908;35661112;35661615;35661615;35661615;35664848;35664848;35664848;35667488;35667488;35667488;35668170;35668170;35668170;35669767;35669767;35669767;35672528;35672530;35672530;35674208;35674208	-;-;-;-;-;-;-;-;-;-;-;-;-;-;-;-;-;-;-;-;-;-;-;-;-;-;-;-;-	1484	537	718	396	47	97	118
CSbapl.2030	BAPLcs_chr1;BAPLcs_chr1;BAPLcs_chr1;BAPLcs_chr1;BAPLcs_chr1;BAPLcs_chr1;BAPLcs_chr1;BAPLcs_chr1;BAPLcs_chr1	35692071;35693475;35694994;35695435;35696370;35697675;35698715;35699750;35702111	35692260;35693620;35695059;35695556;35696448;35697856;35698891;35699870;35702236	-;-;-;-;-;-;-;-;-	1209	0	4	1	29	5	83
CSbapl.2031	BAPLcs_chr1;BAPLcs_chr1;BAPLcs_chr1;BAPLcs_chr1;BAPLcs_chr1;BAPLcs_chr1;BAPLcs_chr1;BAPLcs_chr1;BAPLcs_chr1;BAPLcs_chr1	35712724;35714124;35715644;35716109;35717057;35718364;35719285;35720318;35721818;35725435	35712913;35714269;35715703;35716230;35717135;35718545;35719461;35720438;35722003;35725446	-;-;-;-;-;-;-;-;-;-	1275	0	10	0	3	1	13
CSbapl.2032	BAPLcs_chr1;BAPLcs_chr1;BAPLcs_chr1;BAPLcs_chr1;BAPLcs_chr1;BAPLcs_chr1;BAPLcs_chr1;BAPLcs_chr1;BAPLcs_chr1;BAPLcs_chr1;BAPLcs_chr1;BAPLcs_chr1;BAPLcs_chr1;BAPLcs_chr1;BAPLcs_chr1;BAPLcs_chr1;BAPLcs_chr1;BAPLcs_chr1;BAPLcs_chr1;BAPLcs_chr1;BAPLcs_chr1;BAPLcs_chr1;BAPLcs_chr1;BAPLcs_chr1;BAPLcs_chr1;BAPLcs_chr1;BAPLcs_chr1;BAPLcs_chr1;BAPLcs_chr1;BAPLcs_chr1;BAPLcs_chr1;BAPLcs_chr1;BAPLcs_chr1;BAP…	35764799;35764799;35765806;35765806;35766833;35766833;35769434;35769434;35771200;35771200;35772275;35772275;35773298;35773298;35774171;35774171;35775837;35775837;35777148;35777148;35778003;35778003;35781108;35781108;35785432;35785432;35788155;35788155;35792257;35792257;35792799;35792799;35794376;35794376;35795008;35795008;35797616;35797616;35801616;35804224	35764894;35764894;35765958;35765958;35766931;35766931;35769507;35769507;35771308;35771308;35772385;35772385;35773491;35773491;35774281;35774281;35775903;35775903;35777185;35777185;35778131;35778131;35781183;35781183;35785550;35785550;35788222;35788222;35792339;35792339;35792888;35792888;35794538;35794538;35795081;35795081;35797685;35797678;35801835;35804500	-;-;-;-;-;-;-;-;-;-;-;-;-;-;-;-;-;-;-;-;-;-;-;-;-;-;-;-;-;-;-;-;-;-;-;-;-;-;-;-	2421	774	1068	715	1775	1664	1890
CSbapl.2033	BAPLcs_chr1;BAPLcs_chr1;BAPLcs_chr1;BAPLcs_chr1;BAPLcs_chr1;BAPLcs_chr1;BAPLcs_chr1;BAPLcs_chr1;BAPLcs_chr1;BAPLcs_chr1;BAPLcs_chr1;BAPLcs_chr1;BAPLcs_chr1;BAPLcs_chr1;BAPLcs_chr1;BAPLcs_chr1;BAPLcs_chr1;BAPLcs_chr1;BAPLcs_chr1	35821360;35821360;35824490;35826185;35854321;35854689;35854811;35860456;35860456;35860456;35866433;35866433;35866433;35868463;35868463;35868463;35869454;35869454;35869454	35821525;35821525;35824645;35826342;35854363;35854955;35854955;35860564;35860564;35860564;35866523;35866523;35866523;35868651;35868651;35868651;35869585;35869585;35869585	+;+;+;+;+;+;+;+;+;+;+;+;+;+;+;+;+;+;+	1311	81	232	163	250	327	382
CSbapl.2034	BAPLcs_chr1;BAPLcs_chr1;BAPLcs_chr1;BAPLcs_chr1;BAPLcs_chr1;BAPLcs_chr1;BAPLcs_chr1;BAPLcs_chr1	35832764;35834818;35835409;35837554;35839754;35840873;35842538;35844058	35832942;35834970;35835591;35837717;35839865;35841084;35842694;35844475	-;-;-;-;-;-;-;-	1578	4	4	10	12	2	18
CSbapl.2036	BAPLcs_chr1;BAPLcs_chr1;BAPLcs_chr1;BAPLcs_chr1;BAPLcs_chr1;BAPLcs_chr1	35894546;35894546;35897039;35897039;35908189;35911152	35894778;35894778;35898473;35898473;35908421;35912586	+;+;+;+;+;+	3336	1548	3679	1014	702	1092	1110
CSbapl.2037	BAPLcs_chr1;BAPLcs_chr1;BAPLcs_chr1;BAPLcs_chr1;BAPLcs_chr1;BAPLcs_chr1;BAPLcs_chr1;BAPLcs_chr1;BAPLcs_chr1;BAPLcs_chr1;BAPLcs_chr1;BAPLcs_chr1;BAPLcs_chr1;BAPLcs_chr1;BAPLcs_chr1;BAPLcs_chr1;BAPLcs_chr1;BAPLcs_chr1;BAPLcs_chr1;BAPLcs_chr1;BAPLcs_chr1;BAPLcs_chr1;BAPLcs_chr1;BAPLcs_chr1;BAPLcs_chr1;BAPLcs_chr1;BAPLcs_chr1;BAPLcs_chr1;BAPLcs_chr1;BAPLcs_chr1;BAPLcs_chr1;BAPLcs_chr1;BAPLcs_chr1;BAP…	35936464;35936464;35943634;35943634;35945528;35945528;35946563;35946563;35949221;35949221;35952401;35952401;35956137;35956137;35957766;35957766;35960740;35960740;35972080;35972080;36021413;36021413;36021413;36021413;36022659;36022659;36022659;36022659;36024570;36024570;36024570;36024570;36030694;36030694;36030694;36031783;36031783;36031783;36031825;36034735;36034735;36034735;36034735;36035326;360…	35936685;35936685;35943815;35943815;35945664;35945664;35946658;35946658;35949356;35949356;35952515;35952515;35956338;35956338;35957856;35957856;35960951;35960951;35972189;35972189;36021724;36021724;36021724;36021724;36022752;36022752;36022752;36022752;36024668;36024668;36024668;36024668;36030926;36030926;36030926;36032026;36032026;36032026;36032026;36034829;36034829;36034829;36034829;36035767;360…	+;+;+;+;+;+;+;+;+;+;+;+;+;+;+;+;+;+;+;+;+;+;+;+;+;+;+;+;+;+;+;+;+;+;+;+;+;+;+;+;+;+;+;+;+;+;+;+;+;+;+;+;+;+;+;+;+;+;+;+;+;+;+;+;+;+;+;+;+;+;+;+;+;+;+;+;+;+;+;+;+;+;+;+;+;+;+;+	9313	111	191	64	190	130	177
CSbapl.2039	BAPLcs_chr1;BAPLcs_chr1;BAPLcs_chr1;BAPLcs_chr1;BAPLcs_chr1;BAPLcs_chr1;BAPLcs_chr1;BAPLcs_chr1;BAPLcs_chr1;BAPLcs_chr1;BAPLcs_chr1;BAPLcs_chr1;BAPLcs_chr1;BAPLcs_chr1;BAPLcs_chr1;BAPLcs_chr1;BAPLcs_chr1;BAPLcs_chr1;BAPLcs_chr1;BAPLcs_chr1;BAPLcs_chr1;BAPLcs_chr1;BAPLcs_chr1;BAPLcs_chr1;BAPLcs_chr1;BAPLcs_chr1;BAPLcs_chr1;BAPLcs_chr1;BAPLcs_chr1;BAPLcs_chr1;BAPLcs_chr1;BAPLcs_chr1	36125390;36125475;36129560;36129560;36131636;36131636;36133899;36133899;36134844;36134844;36137332;36137332;36138439;36138439;36142844;36142844;36144760;36144760;36145798;36146746;36155463;36155463;36191429;36195862;36199049;36200567;36201650;36204799;36207481;36208474;36210318;36216702	36125497;36125573;36129804;36129804;36131740;36131740;36134340;36134340;36134938;36134938;36137575;36137575;36138671;36138671;36142942;36142942;36144853;36144853;36146496;36147534;36155783;36155789;36191538;36196073;36199139;36200768;36201764;36204934;36207576;36208610;36210499;36216923	-;-;-;-;-;-;-;-;-;-;-;-;-;-;-;-;-;-;-;-;-;-;-;-;-;-;-;-;-;-;-;-	5059	121	209	123	257	365	315
CSbapl.2042	BAPLcs_chr1;BAPLcs_chr1;BAPLcs_chr1;BAPLcs_chr1;BAPLcs_chr1;BAPLcs_chr1;BAPLcs_chr1;BAPLcs_chr1	36240562;36244718;36254468;36258174;36287619;36287619;36291314;36291314	36241996;36244950;36255902;36258400;36289053;36289053;36291546;36291546	-;-;-;-;-;-;-;-	4998	2453	5752	1505	1078	1962	1945
CSbapl.2043	BAPLcs_chr1;BAPLcs_chr1;BAPLcs_chr1;BAPLcs_chr1;BAPLcs_chr1;BAPLcs_chr1;BAPLcs_chr1;BAPLcs_chr1;BAPLcs_chr1;BAPLcs_chr1;BAPLcs_chr1;BAPLcs_chr1;BAPLcs_chr1;BAPLcs_chr1;BAPLcs_chr1;BAPLcs_chr1;BAPLcs_chr1;BAPLcs_chr1;BAPLcs_chr1	36316494;36316494;36316494;36317428;36317428;36317428;36319586;36319586;36319586;36325540;36325540;36325540;36331162;36331162;36331748;36359737;36361434;36364554;36364554	36316625;36316625;36316625;36317616;36317616;36317616;36319676;36319676;36319676;36325648;36325648;36325648;36331426;36331428;36331793;36359894;36361589;36364719;36364719	-;-;-;-;-;-;-;-;-;-;-;-;-;-;-;-;-;-;-	1314	212	153	157	179	569	530
CSbapl.2045	BAPLcs_chr1;BAPLcs_chr1;BAPLcs_chr1;BAPLcs_chr1;BAPLcs_chr1;BAPLcs_chr1;BAPLcs_chr1;BAPLcs_chr1	36341632;36343412;36345020;36346249;36348396;36350503;36351131;36353131	36342049;36343568;36345231;36346360;36348559;36350685;36351283;36353309	+;+;+;+;+;+;+;+	1578	3	20	8	8	12	14
CSbapl.2048	BAPLcs_chr1;BAPLcs_chr1;BAPLcs_chr1;BAPLcs_chr1;BAPLcs_chr1;BAPLcs_chr1;BAPLcs_chr1;BAPLcs_chr1;BAPLcs_chr1;BAPLcs_chr1;BAPLcs_chr1;BAPLcs_chr1;BAPLcs_chr1;BAPLcs_chr1;BAPLcs_chr1;BAPLcs_chr1;BAPLcs_chr1;BAPLcs_chr1;BAPLcs_chr1;BAPLcs_chr1;BAPLcs_chr1;BAPLcs_chr1;BAPLcs_chr1;BAPLcs_chr1;BAPLcs_chr1;BAPLcs_chr1;BAPLcs_chr1;BAPLcs_chr1;BAPLcs_chr1;BAPLcs_chr1;BAPLcs_chr1;BAPLcs_chr1	36381580;36381580;36384245;36384245;36388395;36388402;36388402;36390350;36390445;36390999;36390999;36390999;36391543;36391543;36391543;36391543;36393193;36393193;36393193;36393193;36393743;36393743;36393743;36393743;36397859;36397859;36397859;36397859;36400520;36400520;36400520;36400520	36381856;36381856;36384507;36384464;36388464;36388464;36388464;36390390;36390510;36391072;36391072;36391072;36391705;36391705;36391705;36391705;36393282;36393282;36393282;36393282;36393825;36393825;36393825;36393825;36397926;36397926;36397926;36397926;36400692;36400692;36400692;36400692	+;+;+;+;+;+;+;+;+;+;+;+;+;+;+;+;+;+;+;+;+;+;+;+;+;+;+;+;+;+;+;+	1368	134	298	181	632	537	669
CSbapl.2050	BAPLcs_chr1;BAPLcs_chr1;BAPLcs_chr1;BAPLcs_chr1	36407379;36409294;36411151;36413204	36408529;36409440;36411294;36413369	-;-;-;-	1608	0	5	2	0	0	12
CSbapl.2051	BAPLcs_chr1;BAPLcs_chr1;BAPLcs_chr1;BAPLcs_chr1;BAPLcs_chr1;BAPLcs_chr1;BAPLcs_chr1;BAPLcs_chr1;BAPLcs_chr1;BAPLcs_chr1;BAPLcs_chr1;BAPLcs_chr1;BAPLcs_chr1;BAPLcs_chr1;BAPLcs_chr1;BAPLcs_chr1;BAPLcs_chr1;BAPLcs_chr1;BAPLcs_chr1;BAPLcs_chr1;BAPLcs_chr1;BAPLcs_chr1;BAPLcs_chr1;BAPLcs_chr1;BAPLcs_chr1;BAPLcs_chr1;BAPLcs_chr1;BAPLcs_chr1;BAPLcs_chr1;BAPLcs_chr1;BAPLcs_chr1;BAPLcs_chr1;BAPLcs_chr1;BAP…	36419103;36426651;36435167;36454269;36455365;36461157;36467224;36501064;36504728;36508938;36510056;36510869;36519218;36542339;36544547;36546808;36547620;36554944;36579841;36579841;36579841;36582735;36582735;36582735;36584618;36584618;36584618;36586475;36586475;36586475;36588528;36588528;36588528;36594464;36597553;36597553;36602058;36607869;36610575;36627137;36628955;36630049;36635955;36641718;366…	36419224;36427775;36435353;36454475;36455559;36461380;36467440;36501351;36504831;36509121;36510364;36511034;36519258;36542525;36544681;36546968;36547703;36554976;36579959;36579959;36579959;36583853;36583853;36583853;36584764;36584764;36584764;36586618;36586618;36586618;36588693;36588693;36588693;36594585;36599016;36599016;36603182;36608015;36610722;36627280;36629161;36630243;36636178;36641915;366…	-;-;-;-;-;-;-;-;-;-;-;-;-;-;-;-;-;-;-;-;-;-;-;-;-;-;-;-;-;-;-;-;-;-;-;-;-;-;-;-;-;-;-;-;-;-	9921	1014	1020	775	993	974	1106
CSbapl.2052	BAPLcs_chr1;BAPLcs_chr1;BAPLcs_chr1;BAPLcs_chr1;BAPLcs_chr1;BAPLcs_chr1;BAPLcs_chr1;BAPLcs_chr1;BAPLcs_chr1;BAPLcs_chr1;BAPLcs_chr1;BAPLcs_chr1;BAPLcs_chr1;BAPLcs_chr1;BAPLcs_chr1;BAPLcs_chr1;BAPLcs_chr1;BAPLcs_chr1;BAPLcs_chr1;BAPLcs_chr1;BAPLcs_chr1;BAPLcs_chr1;BAPLcs_chr1;BAPLcs_chr1;BAPLcs_chr1;BAPLcs_chr1;BAPLcs_chr1;BAPLcs_chr1;BAPLcs_chr1;BAPLcs_chr1;BAPLcs_chr1;BAPLcs_chr1;BAPLcs_chr1;BAP…	36479575;36479575;36481942;36481942;36482734;36482734;36483326;36483326;36485685;36485685;36487171;36487171;36488069;36488069;36490421;36490421;36491080;36491080;36556478;36556478;36559423;36559423;36561142;36561142;36563137;36563137;36564422;36564422;36567468;36567468;36568329;36568329;36569298;36569298;36569933;36569933;36571063;36571063;36573037;36573037;36574735;36575218;36575971;36656452;366…	36479679;36479679;36482041;36482041;36482800;36482800;36483548;36483548;36485780;36485780;36487293;36487293;36488276;36488276;36490514;36490514;36491113;36491113;36556621;36556621;36559514;36559514;36561322;36561322;36563292;36563292;36564532;36564532;36567552;36567552;36568492;36568492;36569393;36569393;36570079;36570079;36571212;36571212;36573189;36573198;36574842;36575375;36576217;36656542;366…	+;+;+;+;+;+;+;+;+;+;+;+;+;+;+;+;+;+;+;+;+;+;+;+;+;+;+;+;+;+;+;+;+;+;+;+;+;+;+;+;+;+;+;+;+;+;+;+;+;+;+;+;+;+;+;+;+;+;+	4017	1563	2092	1081	1758	2401	3215
CSbapl.2054	BAPLcs_chr1;BAPLcs_chr1;BAPLcs_chr1;BAPLcs_chr1;BAPLcs_chr1;BAPLcs_chr1;BAPLcs_chr1;BAPLcs_chr1;BAPLcs_chr1;BAPLcs_chr1;BAPLcs_chr1;BAPLcs_chr1;BAPLcs_chr1;BAPLcs_chr1;BAPLcs_chr1;BAPLcs_chr1;BAPLcs_chr1;BAPLcs_chr1;BAPLcs_chr1;BAPLcs_chr1	36676619;36676619;36677671;36677671;36678413;36678413;36679578;36679578;36680604;36680604;36681914;36681914;36686150;36686150;36686700;36686700;36688400;36688400;36692190;36692190	36676673;36676673;36677798;36677798;36678562;36678562;36679733;36679733;36680834;36680834;36682006;36682006;36686243;36686243;36686893;36686896;36688504;36688504;36692258;36692258	-;-;-;-;-;-;-;-;-;-;-;-;-;-;-;-;-;-;-;-	1278	33	51	38	2107	1973	2371
CSbapl.2055	BAPLcs_chr1	36700043	36700591	-	549	0	0	0	0	1	0
CSbapl.2056	BAPLcs_chr1;BAPLcs_chr1;BAPLcs_chr1;BAPLcs_chr1;BAPLcs_chr1;BAPLcs_chr1	36720343;36720884;36721767;36722308;36728627;36733748	36720449;36721061;36721866;36722414;36728758;36733870	+;+;+;+;+;+	747	25	37	28	11	15	23
CSbapl.2058	BAPLcs_chr1;BAPLcs_chr1;BAPLcs_chr1;BAPLcs_chr1;BAPLcs_chr1;BAPLcs_chr1;BAPLcs_chr1;BAPLcs_chr1;BAPLcs_chr1;BAPLcs_chr1	36739198;36739900;36740552;36741560;36742741;36746412;36747124;36748136;36749509;36752340	36739281;36739976;36740742;36741786;36742789;36746565;36747276;36748277;36749638;36752356	-;-;-;-;-;-;-;-;-;-	1224	68	84	129	2363	3674	4173
CSbapl.2059	BAPLcs_chr1;BAPLcs_chr1;BAPLcs_chr1;BAPLcs_chr1;BAPLcs_chr1;BAPLcs_chr1	36756591;36757818;36761112;36762355;36764121;36766769	36756642;36757991;36761285;36762551;36764277;36766842	+;+;+;+;+;+	828	0	0	0	0	3	6
CSbapl.2060	BAPLcs_chr1;BAPLcs_chr1	36770972;36771652	36771429;36771910	+;+	717	0	0	0	2	0	2
CSbapl.2061	BAPLcs_chr1	36784930	36786111	-	1182	0	2	0	20	14	5
CSbapl.2063	BAPLcs_chr1	36807264	36808757	-	1494	55	136	59	10	13	13
CSbapl.2065	BAPLcs_chr1;BAPLcs_chr1;BAPLcs_chr1;BAPLcs_chr1;BAPLcs_chr1;BAPLcs_chr1	36851394;36852733;36854859;36860798;36862587;36864900	36851574;36852925;36854998;36860971;36862712;36865219	+;+;+;+;+;+	1134	37	23	29	23	21	39
CSbapl.2067	BAPLcs_chr1;BAPLcs_chr1;BAPLcs_chr1;BAPLcs_chr1;BAPLcs_chr1;BAPLcs_chr1;BAPLcs_chr1;BAPLcs_chr1;BAPLcs_chr1;BAPLcs_chr1;BAPLcs_chr1;BAPLcs_chr1;BAPLcs_chr1;BAPLcs_chr1;BAPLcs_chr1;BAPLcs_chr1;BAPLcs_chr1;BAPLcs_chr1;BAPLcs_chr1;BAPLcs_chr1	36876064;36876064;36877969;36877969;36878850;36878850;36880001;36880001;36883571;36883571;36886117;36886117;36887850;36887850;36888953;36888953;36890233;36890233;36891806;36891806	36876196;36876196;36878152;36878152;36879046;36879046;36880132;36880132;36883770;36883770;36886211;36886211;36888075;36888075;36889078;36889078;36890350;36890350;36891996;36891996	+;+;+;+;+;+;+;+;+;+;+;+;+;+;+;+;+;+;+;+	1602	61	63	58	61	64	82
CSbapl.2068	BAPLcs_chr1;BAPLcs_chr1;BAPLcs_chr1;BAPLcs_chr1;BAPLcs_chr1;BAPLcs_chr1;BAPLcs_chr1;BAPLcs_chr1;BAPLcs_chr1;BAPLcs_chr1;BAPLcs_chr1;BAPLcs_chr1;BAPLcs_chr1;BAPLcs_chr1;BAPLcs_chr1;BAPLcs_chr1;BAPLcs_chr1;BAPLcs_chr1	36909829;36909829;36914206;36914206;36918309;36918309;36920617;36920617;36921740;36921740;36922867;36922867;36924687;36924687;36928502;36928502;36929567;36929567	36911476;36911476;36914313;36914313;36918422;36918422;36920685;36920685;36922378;36922378;36923199;36923199;36924791;36924791;36928567;36928567;36930207;36930207	+;+;+;+;+;+;+;+;+;+;+;+;+;+;+;+;+;+	3723	48	24	10	28	4	29
CSbapl.2073	BAPLcs_chr1;BAPLcs_chr1;BAPLcs_chr1;BAPLcs_chr1;BAPLcs_chr1	37026301;37101529;37103298;37104638;37105470	37026529;37101843;37103381;37104934;37105561	+;+;+;+;+	1017	6	12	1	0	1	13
CSbapl.2075	BAPLcs_chr1;BAPLcs_chr1;BAPLcs_chr1;BAPLcs_chr1;BAPLcs_chr1;BAPLcs_chr1	37052848;37055246;37055667;37056524;37058143;37059562	37053548;37055367;37055730;37056644;37058256;37059693	-;-;-;-;-;-	1254	2	0	3	0	3	0
CSbapl.2076	BAPLcs_chr1;BAPLcs_chr1;BAPLcs_chr1	37072376;37073848;37078537	37072590;37073997;37078744	-;-;-	573	29	29	17	7	25	10
CSbapl.2080	BAPLcs_chr1;BAPLcs_chr1;BAPLcs_chr1	37110335;37111278;37116178	37110556;37111393;37117156	+;+;+	1317	0	0	0	0	0	2
CSbapl.2081	BAPLcs_chr1;BAPLcs_chr1;BAPLcs_chr1;BAPLcs_chr1;BAPLcs_chr1;BAPLcs_chr1;BAPLcs_chr1;BAPLcs_chr1;BAPLcs_chr1;BAPLcs_chr1	37130797;37137351;37139041;37143499;37144879;37146132;37146908;37147655;37148983;37172715	37130901;37137499;37139179;37143618;37144957;37146213;37147004;37147765;37149171;37172774	-;-;-;-;-;-;-;-;-;-	1131	5	0	1	15	5	31
CSbapl.2083	BAPLcs_chr1;BAPLcs_chr1;BAPLcs_chr1;BAPLcs_chr1;BAPLcs_chr1;BAPLcs_chr1;BAPLcs_chr1;BAPLcs_chr1;BAPLcs_chr1;BAPLcs_chr1;BAPLcs_chr1;BAPLcs_chr1;BAPLcs_chr1;BAPLcs_chr1;BAPLcs_chr1;BAPLcs_chr1	37202149;37202902;37204062;37204193;37205088;37205088;37206397;37206397;37210639;37210639;37211189;37211189;37212367;37212367;37216131;37216131	37202280;37203051;37204142;37204216;37205318;37205318;37206489;37206489;37210732;37210732;37211385;37211382;37212471;37212471;37216199;37216199	-;-;-;-;-;-;-;-;-;-;-;-;-;-;-;-	1176	16	43	14	712	972	1068
CSbapl.2084	BAPLcs_chr1;BAPLcs_chr1;BAPLcs_chr1;BAPLcs_chr1;BAPLcs_chr1;BAPLcs_chr1;BAPLcs_chr1;BAPLcs_chr1;BAPLcs_chr1;BAPLcs_chr1;BAPLcs_chr1;BAPLcs_chr1;BAPLcs_chr1;BAPLcs_chr1;BAPLcs_chr1;BAPLcs_chr1;BAPLcs_chr1;BAPLcs_chr1;BAPLcs_chr1;BAPLcs_chr1;BAPLcs_chr1;BAPLcs_chr1;BAPLcs_chr1;BAPLcs_chr1;BAPLcs_chr1;BAPLcs_chr1;BAPLcs_chr1;BAPLcs_chr1;BAPLcs_chr1	37216523;37230149;37233583;37233993;37233993;37233993;37234805;37234805;37234805;37240673;37240673;37240673;37242033;37242033;37242033;37242967;37242967;37244301;37244301;37244843;37244843;37245730;37245730;37246271;37246271;37252590;37252590;37257598;37257598	37216552;37230172;37233636;37234142;37234142;37234142;37234906;37234906;37234906;37240840;37240840;37240840;37242476;37242296;37242296;37243034;37243034;37244408;37244408;37245020;37245020;37245829;37245829;37246377;37246377;37252721;37252721;37257720;37257720	+;+;+;+;+;+;+;+;+;+;+;+;+;+;+;+;+;+;+;+;+;+;+;+;+;+;+;+;+	1788	68	71	45	37	49	22
CSbapl.2085	BAPLcs_chr1;BAPLcs_chr1;BAPLcs_chr1;BAPLcs_chr1;BAPLcs_chr1;BAPLcs_chr1;BAPLcs_chr1;BAPLcs_chr1;BAPLcs_chr1;BAPLcs_chr1;BAPLcs_chr1	37263040;37263742;37264392;37265399;37266582;37270406;37271118;37272130;37273503;37286438;37308978	37263123;37263818;37264582;37265625;37266630;37270559;37271270;37272271;37273632;37286781;37310108	-;-;-;-;-;-;-;-;-;-;-	2682	48	105	40	1146	1338	2403
CSbapl.2086	BAPLcs_chr1;BAPLcs_chr1;BAPLcs_chr1;BAPLcs_chr1;BAPLcs_chr1;BAPLcs_chr1	37280655;37281874;37285163;37286406;37288173;37290822	37280706;37282047;37285336;37286602;37288329;37290895	+;+;+;+;+;+	828	0	2	0	1	0	0
CSbapl.2087	BAPLcs_chr1;BAPLcs_chr1;BAPLcs_chr1;BAPLcs_chr1	37295026;37295026;37295938;37296436	37295483;37296021;37296253;37296591	+;+;+;+	1384	0	0	0	0	0	2
CSbapl.2088	BAPLcs_chr1	37318518	37318880	-	363	8	10	2	37	10	54
CSbapl.2089	BAPLcs_chr1;BAPLcs_chr1	37331214;37331214	37332785;37332788	-;-	1575	27	91	30	6	2	6
CSbapl.2091	BAPLcs_chr1	37354045	37355670	+	1626	0	2	1	1	2	0
CSbapl.2093	BAPLcs_chr1;BAPLcs_chr1;BAPLcs_chr1;BAPLcs_chr1;BAPLcs_chr1;BAPLcs_chr1	37375361;37376720;37378899;37384845;37386550;37388863	37375541;37376912;37379038;37385018;37386675;37389182	+;+;+;+;+;+	1134	21	15	8	16	9	31
CSbapl.2094	BAPLcs_chr1;BAPLcs_chr1;BAPLcs_chr1;BAPLcs_chr1;BAPLcs_chr1;BAPLcs_chr1;BAPLcs_chr1;BAPLcs_chr1;BAPLcs_chr1;BAPLcs_chr1;BAPLcs_chr1;BAPLcs_chr1;BAPLcs_chr1;BAPLcs_chr1;BAPLcs_chr1;BAPLcs_chr1;BAPLcs_chr1;BAPLcs_chr1;BAPLcs_chr1;BAPLcs_chr1	37400006;37400006;37401914;37401914;37402795;37402795;37403947;37403947;37407517;37407517;37410055;37410055;37411788;37411788;37412891;37412891;37414171;37414171;37415744;37415744	37400138;37400138;37402097;37402097;37402991;37402991;37404078;37404078;37407716;37407716;37410149;37410149;37412013;37412013;37413016;37413016;37414288;37414288;37415934;37415934	+;+;+;+;+;+;+;+;+;+;+;+;+;+;+;+;+;+;+;+	1602	50	88	36	61	96	54
CSbapl.2095	BAPLcs_chr1;BAPLcs_chr1;BAPLcs_chr1;BAPLcs_chr1;BAPLcs_chr1;BAPLcs_chr1;BAPLcs_chr1;BAPLcs_chr1;BAPLcs_chr1;BAPLcs_chr1;BAPLcs_chr1;BAPLcs_chr1;BAPLcs_chr1;BAPLcs_chr1;BAPLcs_chr1;BAPLcs_chr1;BAPLcs_chr1;BAPLcs_chr1	37433766;37433766;37438143;37438143;37442246;37442246;37444554;37444554;37445676;37445676;37446803;37446803;37448622;37448622;37452436;37452436;37453502;37453502	37435413;37435413;37438250;37438250;37442359;37442359;37444622;37444622;37446314;37446314;37447135;37447135;37448726;37448726;37452501;37452501;37454142;37454142	+;+;+;+;+;+;+;+;+;+;+;+;+;+;+;+;+;+	3723	41	40	4	20	15	12
CSbapl.2102	BAPLcs_chr1;BAPLcs_chr1;BAPLcs_chr1;BAPLcs_chr1;BAPLcs_chr1	37501797;37549403;37554277;37558041;37560531	37501897;37549635;37554557;37558333;37560705	+;+;+;+;+	1083	9	22	4	5	13	23
CSbapl.2107	BAPLcs_chr1;BAPLcs_chr1;BAPLcs_chr1;BAPLcs_chr1;BAPLcs_chr1;BAPLcs_chr1	37580196;37582508;37582929;37583667;37585322;37586733	37580896;37582629;37582992;37583787;37585435;37586864	-;-;-;-;-;-	1254	0	2	1	0	0	3
CSbapl.2108	BAPLcs_chr1;BAPLcs_chr1;BAPLcs_chr1	37598956;37601385;37606074	37599170;37601534;37606281	-;-;-	573	39	46	83	8	31	21
CSbapl.2109	BAPLcs_chr1;BAPLcs_chr1;BAPLcs_chr1;BAPLcs_chr1;BAPLcs_chr1;BAPLcs_chr1	37627616;37630521;37631623;37632284;37633623;37634456	37627679;37630835;37631838;37632367;37633919;37634547	+;+;+;+;+;+	1068	3	19	1	0	7	6
CSbapl.2110	BAPLcs_chr1;BAPLcs_chr1;BAPLcs_chr1	37639602;37640539;37644815	37639823;37640654;37645775	+;+;+	1299	0	2	2	12	8	4
CSbapl.2111	BAPLcs_chr1;BAPLcs_chr1;BAPLcs_chr1;BAPLcs_chr1;BAPLcs_chr1;BAPLcs_chr1;BAPLcs_chr1;BAPLcs_chr1;BAPLcs_chr1;BAPLcs_chr1;BAPLcs_chr1;BAPLcs_chr1;BAPLcs_chr1;BAPLcs_chr1;BAPLcs_chr1;BAPLcs_chr1;BAPLcs_chr1;BAPLcs_chr1;BAPLcs_chr1;BAPLcs_chr1;BAPLcs_chr1	37654508;37654811;37656052;37657174;37659561;37663015;37667098;37667868;37669982;37670716;37671736;37674526;37676381;37682885;37683333;37689043;37690868;37691319;37692866;37693853;37697330	37654612;37654970;37656143;37657340;37659699;37663134;37667176;37667949;37670078;37670826;37671924;37674641;37676669;37683006;37683432;37689144;37690975;37691408;37693045;37693929;37697372	-;-;-;-;-;-;-;-;-;-;-;-;-;-;-;-;-;-;-;-;-	2568	62	52	33	600	386	800
CSbapl.2112	BAPLcs_chr1	37678286	37679572	+	1287	3	20	15	46	22	31
CSbapl.2113	BAPLcs_chr1;BAPLcs_chr1;BAPLcs_chr1;BAPLcs_chr1	37714085;37714085;37716425;37716425	37714541;37714541;37716735;37716735	+;+;+;+	768	182	146	99	237	245	197
CSbapl.2115	BAPLcs_chr1;BAPLcs_chr1;BAPLcs_chr1;BAPLcs_chr1;BAPLcs_chr1;BAPLcs_chr1;BAPLcs_chr1;BAPLcs_chr1;BAPLcs_chr1;BAPLcs_chr1;BAPLcs_chr1;BAPLcs_chr1	37763822;37763822;37768100;37768100;37769209;37769209;37771025;37771025;37772553;37772553;37773782;37774945	37763950;37763950;37768166;37768166;37769381;37769381;37771191;37771191;37772625;37772649;37773863;37775042	-;-;-;-;-;-;-;-;-;-;-;-	813	153	180	135	560	367	446
CSbapl.2116	BAPLcs_chr1;BAPLcs_chr1;BAPLcs_chr1;BAPLcs_chr1;BAPLcs_chr1;BAPLcs_chr1;BAPLcs_chr1	37782175;37783310;37783349;37784620;37784620;37786554;37786554	37782318;37783429;37783429;37784663;37784663;37786752;37786752	-;-;-;-;-;-;-	507	975	805	751	1053	841	940
CSbapl.2117	BAPLcs_chr1;BAPLcs_chr1;BAPLcs_chr1	37791915;37855222;37856244	37793152;37855349;37856272	-;-;-	1395	0	8	4	8	0	2
CSbapl.2118	BAPLcs_chr1;BAPLcs_chr1;BAPLcs_chr1;BAPLcs_chr1;BAPLcs_chr1;BAPLcs_chr1;BAPLcs_chr1;BAPLcs_chr1;BAPLcs_chr1;BAPLcs_chr1;BAPLcs_chr1;BAPLcs_chr1;BAPLcs_chr1;BAPLcs_chr1;BAPLcs_chr1;BAPLcs_chr1	37805532;37806821;37808325;37809535;37812289;37813128;37814093;37815040;37815550;37816471;37817479;37821255;37833125;37835840;37837479;37839318	37805631;37806888;37808548;37809718;37812381;37813287;37814274;37815121;37815644;37816617;37817588;37821342;37833329;37835994;37837648;37839549	+;+;+;+;+;+;+;+;+;+;+;+;+;+;+;+	2295	187	263	130	385	734	1005
CSbapl.2119	BAPLcs_chr1;BAPLcs_chr1;BAPLcs_chr1;BAPLcs_chr1;BAPLcs_chr1;BAPLcs_chr1;BAPLcs_chr1;BAPLcs_chr1;BAPLcs_chr1;BAPLcs_chr1;BAPLcs_chr1	37900501;37900501;37911767;37942285;37953520;37954900;37966379;37969230;37970982;37972319;37973153	37902117;37902117;37912930;37943458;37953669;37955114;37966442;37969544;37971065;37972615;37973244	+;+;+;+;+;+;+;+;+;+;+	5172	10	19	11	9	4	5
CSbapl.2120	BAPLcs_chr1;BAPLcs_chr1;BAPLcs_chr1	37981589;37982514;37986160	37981810;37982629;37987129	+;+;+	1308	0	2	2	6	4	12
CSbapl.2124	BAPLcs_chr1;BAPLcs_chr1;BAPLcs_chr1;BAPLcs_chr1;BAPLcs_chr1;BAPLcs_chr1;BAPLcs_chr1;BAPLcs_chr1;BAPLcs_chr1;BAPLcs_chr1;BAPLcs_chr1;BAPLcs_chr1;BAPLcs_chr1;BAPLcs_chr1;BAPLcs_chr1;BAPLcs_chr1;BAPLcs_chr1;BAPLcs_chr1;BAPLcs_chr1;BAPLcs_chr1;BAPLcs_chr1	37999197;37999499;38000754;38001864;38005570;38009015;38013046;38013827;38014677;38017076;38020425;38023215;38024867;38027400;38027839;38028811;38030599;38031051;38032595;38033597;38037103	37999301;37999658;38000845;38002030;38005708;38009134;38013124;38013908;38014773;38017186;38020613;38023330;38025155;38027521;38027938;38028912;38030706;38031140;38032774;38033673;38037145	-;-;-;-;-;-;-;-;-;-;-;-;-;-;-;-;-;-;-;-;-	2568	53	100	64	517	437	578
CSbapl.2126	BAPLcs_chr1;BAPLcs_chr1;BAPLcs_chr1	38098475;38098475;38127238	38099620;38099620;38127738	-;-;-	1647	3638	3319	2715	1435	1396	1908
CSbapl.2127	BAPLcs_chr1;BAPLcs_chr1	38080941;38086320	38081063;38087327	+;+	1131	31	66	40	4	66	18
CSbapl.2131	BAPLcs_chr1;BAPLcs_chr1;BAPLcs_chr1;BAPLcs_chr1;BAPLcs_chr1;BAPLcs_chr1;BAPLcs_chr1;BAPLcs_chr1;BAPLcs_chr1;BAPLcs_chr1;BAPLcs_chr1;BAPLcs_chr1;BAPLcs_chr1;BAPLcs_chr1;BAPLcs_chr1;BAPLcs_chr1;BAPLcs_chr1;BAPLcs_chr1;BAPLcs_chr1;BAPLcs_chr1;BAPLcs_chr1;BAPLcs_chr1;BAPLcs_chr1;BAPLcs_chr1;BAPLcs_chr1;BAPLcs_chr1;BAPLcs_chr1;BAPLcs_chr1;BAPLcs_chr1;BAPLcs_chr1;BAPLcs_chr1;BAPLcs_chr1;BAPLcs_chr1;BAP…	38147786;38147786;38149261;38149261;38150260;38150260;38151081;38151081;38151622;38151748;38151748;38152453;38152453;38152453;38153656;38153656;38153656;38158527;38158527;38158527;38160509;38160509;38160509;38161830;38161830;38161830;38163426;38163426;38163426;38168230;38170796;38170796;38170796;38181108;38181108;38194891;38200936	38147912;38147912;38149336;38149336;38150308;38150308;38151173;38151173;38151802;38151802;38151802;38152548;38152548;38152548;38153733;38153733;38153733;38158598;38158598;38158598;38160629;38160629;38160629;38161896;38161896;38161896;38163471;38163471;38163471;38168334;38170906;38170906;38170906;38181194;38181193;38194949;38200946	-;-;-;-;-;-;-;-;-;-;-;-;-;-;-;-;-;-;-;-;-;-;-;-;-;-;-;-;-;-;-;-;-;-;-;-;-	1379	165	269	141	442	513	472
CSbapl.2148	BAPLcs_chr1;BAPLcs_chr1;BAPLcs_chr1;BAPLcs_chr1	38328775;38334018;38337020;38339139	38328921;38334045;38337166;38339389	+;+;+;+	573	4	47	8	2	11	0
CSbapl.2150	BAPLcs_chr1	38358627	38359826	+	1200	11	25	15	3	15	21
CSbapl.2152	BAPLcs_chr1	38373055	38374986	-	1932	0	0	0	1	1	1
CSbapl.2154	BAPLcs_chr1	38395677	38396840	-	1164	0	2	1	0	7	2
CSbapl.2155	BAPLcs_chr1	38403888	38405369	-	1482	0	8	2	9	1	0
CSbapl.2157	BAPLcs_chr1	38448718	38449917	+	1200	12	26	0	10	12	5
CSbapl.2159	BAPLcs_chr1	38471224	38472642	-	1419	3	5	0	0	4	2
CSbapl.2160	BAPLcs_chr1	38500059	38500910	+	852	11	2	5	10	3	4
CSbapl.2161	BAPLcs_chr1;BAPLcs_chr1	38524815;38531075	38525822;38531197	-;-	1131	10	33	14	15	17	29
CSbapl.2163	BAPLcs_chr1;BAPLcs_chr1	38535067;38537836	38535192;38538840	+;+	1131	28882	30982	18955	9738	22811	15370
CSbapl.2165	BAPLcs_chr1	38571861	38572865	-	1005	1	1	2	0	0	2
CSbapl.2167	BAPLcs_chr1	38611710	38612024	-	315	1	0	2	0	0	2
CSbapl.2168	BAPLcs_chr1	38612550	38613554	-	1005	0	0	0	0	0	1
CSbapl.2171	BAPLcs_chr1	38639284	38640045	-	762	0	0	0	3	0	0
CSbapl.2173	BAPLcs_chr1	38640954	38641415	-	462	0	0	0	1	0	0
CSbapl.2176	BAPLcs_chr1;BAPLcs_chr1;BAPLcs_chr1;BAPLcs_chr1;BAPLcs_chr1;BAPLcs_chr1;BAPLcs_chr1;BAPLcs_chr1;BAPLcs_chr1;BAPLcs_chr1;BAPLcs_chr1;BAPLcs_chr1;BAPLcs_chr1;BAPLcs_chr1;BAPLcs_chr1;BAPLcs_chr1;BAPLcs_chr1;BAPLcs_chr1;BAPLcs_chr1;BAPLcs_chr1	38694927;38694927;38694927;38696958;38697904;38697904;38697904;38697904;38698000;38698478;38698478;38698478;38698478;38698478;38699212;38699212;38699212;38699212;38699594;38699594	38695148;38695148;38695148;38696987;38698048;38698048;38698048;38698048;38698048;38698611;38698620;38698611;38698611;38698611;38699314;38699314;38699346;38699346;38699946;38699946	+;+;+;+;+;+;+;+;+;+;+;+;+;+;+;+;+;+;+;+	1028	555	1829	236	938	1578	1412
CSbapl.2181	BAPLcs_chr1	38750295	38751503	-	1209	0	0	0	5	0	1
CSbapl.2198	BAPLcs_chr1;BAPLcs_chr1;BAPLcs_chr1	38849431;38849431;38849431	38851887;38851887;38851887	+;+;+	2457	108	112	75	202	82	179
CSbapl.2200	BAPLcs_chr1;BAPLcs_chr1;BAPLcs_chr1;BAPLcs_chr1;BAPLcs_chr1;BAPLcs_chr1;BAPLcs_chr1;BAPLcs_chr1;BAPLcs_chr1;BAPLcs_chr1;BAPLcs_chr1;BAPLcs_chr1;BAPLcs_chr1;BAPLcs_chr1;BAPLcs_chr1	38857521;38857521;38860308;38860308;38861844;38861844;38863580;38863580;38864612;38864612;38865208;38865208;38866558;38866558;38873691	38857640;38857640;38860453;38860453;38861994;38861994;38863753;38863753;38864709;38864709;38865392;38865392;38866748;38866697;38873807	+;+;+;+;+;+;+;+;+;+;+;+;+;+;+	1182	115	236	51	43	19	35
CSbapl.2202	BAPLcs_chr1;BAPLcs_chr1;BAPLcs_chr1	38885888;38907317;38908954	38886433;38908111;38910612	-;-;-	3000	0	3	0	3	0	0
CSbapl.2206	BAPLcs_chr1;BAPLcs_chr1;BAPLcs_chr1;BAPLcs_chr1	38924312;38924312;38927227;38927227	38925877;38925877;38928834;38928834	-;-;-;-	3174	2	12	0	3	0	2
CSbapl.2211	BAPLcs_chr1	38963025	38963408	+	384	0	3	0	2	0	4
CSbapl.2212	BAPLcs_chr1;BAPLcs_chr1;BAPLcs_chr1;BAPLcs_chr1	38973142;38977213;38977980;38981529	38974485;38977368;38978105;38981813	-;-;-;-	1911	0	6	0	2	0	4
CSbapl.2214	BAPLcs_chr1;BAPLcs_chr1;BAPLcs_chr1;BAPLcs_chr1;BAPLcs_chr1;BAPLcs_chr1	38985825;38985825;38985825;38988241;38988241;38988241	38987396;38987396;38987396;38989896;38989896;38989896	-;-;-;-;-;-	3228	0	4	0	0	0	0
CSbapl.2216	BAPLcs_chr1;BAPLcs_chr1	39002643;39007867	39004199;39009456	+;+	3147	0	0	0	4	0	0
CSbapl.2217	BAPLcs_chr1;BAPLcs_chr1	39013820;39013820	39015250;39015250	-;-	1431	2	4	2	2	0	2
CSbapl.2237	BAPLcs_chr1;BAPLcs_chr1	39192767;39192767	39193747;39193747	-;-	981	1611	2631	1065	69	269	434
CSbapl.2240	BAPLcs_chr1	39318684	39319031	-	348	0	0	0	1	2	0
CSbapl.2246	BAPLcs_chr1;BAPLcs_chr1;BAPLcs_chr1	39339446;39341892;39345008	39339717;39342055;39345390	+;+;+	819	2	84	16	16286	13954	19473
CSbapl.2247	BAPLcs_chr1;BAPLcs_chr1	39357676;39357676	39358683;39358683	+;+	1008	2	22	0	537	268	592
CSbapl.2251	BAPLcs_chr1;BAPLcs_chr1;BAPLcs_chr1;BAPLcs_chr1;BAPLcs_chr1;BAPLcs_chr1;BAPLcs_chr1;BAPLcs_chr1;BAPLcs_chr1;BAPLcs_chr1;BAPLcs_chr1;BAPLcs_chr1;BAPLcs_chr1;BAPLcs_chr1;BAPLcs_chr1;BAPLcs_chr1;BAPLcs_chr1;BAPLcs_chr1;BAPLcs_chr1;BAPLcs_chr1;BAPLcs_chr1;BAPLcs_chr1;BAPLcs_chr1;BAPLcs_chr1;BAPLcs_chr1;BAPLcs_chr1;BAPLcs_chr1;BAPLcs_chr1;BAPLcs_chr1;BAPLcs_chr1;BAPLcs_chr1;BAPLcs_chr1;BAPLcs_chr1;BAP…	39391241;39391241;39391241;39391241;39391241;39391241;39391241;39391241;39391241;39391241;39396932;39398679;39398679;39398679;39398679;39398679;39398679;39398679;39398679;39398679;39398679;39398679;39399720;39399720;39399720;39399720;39399720;39399720;39399720;39399720;39399720;39399720;39399720;39401162;39401162;39401162;39401162;39401162;39401162;39401162;39401162;39401162;39401162;39401162;394…	39391357;39391357;39391357;39391357;39391357;39391357;39391357;39391357;39391357;39391357;39397108;39398756;39398756;39398756;39398756;39398756;39398756;39398756;39398756;39398756;39398756;39398756;39399857;39399857;39399857;39399857;39399857;39399857;39399857;39399857;39399857;39399857;39399857;39401283;39401283;39401283;39401283;39401283;39401283;39401283;39401283;39401283;39401283;39401283;394…	-;-;-;-;-;-;-;-;-;-;-;-;-;-;-;-;-;-;-;-;-;-;-;-;-;-;-;-;-;-;-;-;-;-;-;-;-;-;-;-;-;-;-;-;-;-;-;-;-;-;-;-;-;-;-;-;-;-;-;-;-;-;-;-;-;-;-;-;-;-;-;-;-;-;-;-;-;-;-;-;-;-;-;-;-;-;-;-;-;-;-;-;-;-;-;-;-;-;-;-;-;-;-;-;-;-;-;-;-;-;-;-;-;-;-;-;-;-;-;-;-;-;-;-;-;-;-;-;-;-;-;-;-;-;-;-;-;-;-;-;-;-;-;-;-;-;-;-;-;-;-;-;-;-;-;-;-;-;-;-;-;-;-;-;-;-;-;-;-;-;-;-;-;-;-;-;-;-;-;-;-;-;-;-;-;-;-;-;-;-;-;-;-;-;-;-;-;-;-;-…	5930	632	1204	420	2502	2481	2443
CSbapl.2256	BAPLcs_chr1	39554145	39554840	-	696	0	2	0	4	0	1
CSbapl.2257	BAPLcs_chr1;BAPLcs_chr1;BAPLcs_chr1;BAPLcs_chr1	39561456;39561456;39563121;39563121	39562324;39562324;39563181;39563193	-;-;-;-	942	16	53	0	0	10	25
CSbapl.2262	BAPLcs_chr1	39597312	39597905	-	594	114	98	123	13	14	28
CSbapl.2265	BAPLcs_chr1;BAPLcs_chr1;BAPLcs_chr1	39605252;39605252;39605252	39607663;39607663;39607663	-;-;-	2412	96	67	33	1382	1223	1782
CSbapl.2267	BAPLcs_chr1;BAPLcs_chr1;BAPLcs_chr1;BAPLcs_chr1;BAPLcs_chr1;BAPLcs_chr1;BAPLcs_chr1;BAPLcs_chr1;BAPLcs_chr1;BAPLcs_chr1;BAPLcs_chr1;BAPLcs_chr1;BAPLcs_chr1;BAPLcs_chr1;BAPLcs_chr1;BAPLcs_chr1;BAPLcs_chr1;BAPLcs_chr1	39638052;39639746;39640856;39642712;39643671;39646143;39647841;39649641;39651064;39652412;39654422;39656092;39658898;39659879;39660698;39664453;39666584;39668381	39638168;39639787;39641132;39642836;39643824;39646258;39647905;39649758;39651152;39652532;39654589;39656235;39658987;39659974;39660805;39664571;39666721;39668456	-;-;-;-;-;-;-;-;-;-;-;-;-;-;-;-;-;-	2163	180	207	241	563	518	574
CSbapl.2268	BAPLcs_chr1;BAPLcs_chr1;BAPLcs_chr1;BAPLcs_chr1;BAPLcs_chr1;BAPLcs_chr1;BAPLcs_chr1;BAPLcs_chr1;BAPLcs_chr1;BAPLcs_chr1;BAPLcs_chr1;BAPLcs_chr1;BAPLcs_chr1;BAPLcs_chr1;BAPLcs_chr1;BAPLcs_chr1;BAPLcs_chr1;BAPLcs_chr1;BAPLcs_chr1;BAPLcs_chr1;BAPLcs_chr1;BAPLcs_chr1;BAPLcs_chr1;BAPLcs_chr1;BAPLcs_chr1;BAPLcs_chr1;BAPLcs_chr1;BAPLcs_chr1;BAPLcs_chr1;BAPLcs_chr1;BAPLcs_chr1;BAPLcs_chr1;BAPLcs_chr1;BAP…	39685371;39685371;39685371;39685371;39685371;39686269;39686269;39686269;39686269;39686269;39687272;39687272;39687272;39687272;39687272;39687975;39687975;39687975;39687975;39687975;39694190;39694190;39694190;39694190;39694190;39696327;39696327;39696327;39696327;39697676;39697676;39697676;39697676;39697676;39698479;39698479;39698479;39698479;39699457;39699457;39699457;39701438;39701438;39701438;397…	39685485;39685485;39685485;39685485;39685485;39686636;39686636;39686636;39686636;39686636;39687668;39687668;39687668;39687668;39687668;39688208;39688208;39688208;39688208;39688208;39694402;39694402;39694402;39694402;39694402;39696433;39696433;39696433;39696433;39697826;39697826;39697677;39697826;39697826;39698642;39698651;39698642;39698642;39699645;39699645;39699645;39701543;39701543;39701543;397…	+;+;+;+;+;+;+;+;+;+;+;+;+;+;+;+;+;+;+;+;+;+;+;+;+;+;+;+;+;+;+;+;+;+;+;+;+;+;+;+;+;+;+;+;+;+;+	2280	475	549	354	325	1149	687
CSbapl.2270	BAPLcs_chr1;BAPLcs_chr1;BAPLcs_chr1;BAPLcs_chr1;BAPLcs_chr1;BAPLcs_chr1;BAPLcs_chr1;BAPLcs_chr1;BAPLcs_chr1;BAPLcs_chr1;BAPLcs_chr1;BAPLcs_chr1;BAPLcs_chr1;BAPLcs_chr1;BAPLcs_chr1;BAPLcs_chr1;BAPLcs_chr1;BAPLcs_chr1;BAPLcs_chr1;BAPLcs_chr1;BAPLcs_chr1;BAPLcs_chr1;BAPLcs_chr1;BAPLcs_chr1;BAPLcs_chr1;BAPLcs_chr1;BAPLcs_chr1;BAPLcs_chr1;BAPLcs_chr1;BAPLcs_chr1;BAPLcs_chr1;BAPLcs_chr1;BAPLcs_chr1;BAP…	39717682;39717682;39717682;39724466;39724466;39724466;39725833;39725833;39725833;39727757;39727757;39727757;39729513;39729513;39729513;39730320;39730320;39730320;39734604;39734604;39736774;39736774;39738930;39738930;39738930;39739130;39739130;39739130;39739130;39739130;39739802;39739802;39739802;39739802;39739802;39739802;39739802;39739802;39740231;39740231;39740231;39740231;39740231;39740231;397…	39717788;39717788;39717788;39724557;39724557;39724557;39725942;39725942;39725942;39727929;39727929;39727929;39729614;39729614;39729614;39730367;39730367;39730367;39734630;39734630;39736793;39736793;39739244;39739244;39739262;39739244;39739244;39739262;39739244;39739262;39739874;39739874;39739874;39739874;39739874;39739874;39739874;39739874;39740407;39740407;39740407;39740407;39740407;39740407;397…	-;-;-;-;-;-;-;-;-;-;-;-;-;-;-;-;-;-;-;-;-;-;-;-;-;-;-;-;-;-;-;-;-;-;-;-;-;-;-;-;-;-;-;-;-;-;-;-;-;-;-;-;-;-;-;-;-;-;-;-;-;-;-;-;-;-;-;-;-;-;-;-;-;-;-;-;-;-;-;-;-;-;-;-;-;-;-;-;-;-;-;-;-;-;-;-;-;-;-;-;-;-;-;-;-;-;-;-;-;-;-;-;-;-;-;-;-;-;-;-;-;-;-;-;-;-;-;-;-;-;-;-;-;-;-;-;-;-;-;-;-;-;-;-;-;-;-;-;-;-;-;-;-;-;-;-;-;-;-;-;-;-;-;-;-;-;-;-;-;-;-;-;-;-;-;-;-;-;-;-	2931	952	1532	763	1026	1945	1688
CSbapl.2273	BAPLcs_chr1;BAPLcs_chr1;BAPLcs_chr1;BAPLcs_chr1;BAPLcs_chr1;BAPLcs_chr1	39877989;39877989;39877989;39884853;39884853;39884853	39878523;39878523;39878523;39885016;39885019;39885016	-;-;-;-;-;-	702	718	461	517	430	351	412
CSbapl.2275	BAPLcs_chr1	39892649	39893473	+	825	2	0	0	0	2	0
CSbapl.2278	BAPLcs_chr1;BAPLcs_chr1;BAPLcs_chr1;BAPLcs_chr1;BAPLcs_chr1;BAPLcs_chr1	39900199;39901720;39904181;39905479;39906486;39908053	39900456;39901937;39904354;39905667;39906627;39908244	-;-;-;-;-;-	1173	2	0	0	17	2	20
CSbapl.2281	BAPLcs_chr1;BAPLcs_chr1;BAPLcs_chr1;BAPLcs_chr1;BAPLcs_chr1;BAPLcs_chr1;BAPLcs_chr1	39954513;39955933;39958290;39959240;39961145;39963037;39964939	39954698;39956133;39958431;39959425;39961318;39963254;39965154	+;+;+;+;+;+;+	1323	18	34	26	17	41	30
CSbapl.2284	BAPLcs_chr1;BAPLcs_chr1;BAPLcs_chr1;BAPLcs_chr1	40000075;40000075;40000932;40000932	40000135;40000135;40001800;40001800	+;+;+;+	930	18	29	0	0	6	4
CSbapl.2287	BAPLcs_chr1	40038980	40039453	+	474	0	0	0	0	0	2
CSbapl.2288	BAPLcs_chr1;BAPLcs_chr1;BAPLcs_chr1	40040842;40043588;40044858	40040895;40043785;40044989	+;+;+	384	13	11	9	116	116	73
CSbapl.2289	BAPLcs_chr1	40048794	40049207	+	414	0	2	3	0	0	1
CSbapl.2296	BAPLcs_chr1	40069727	40070125	-	399	1	9	0	0	0	0
CSbapl.2301	BAPLcs_chr1;BAPLcs_chr1;BAPLcs_chr1;BAPLcs_chr1;BAPLcs_chr1;BAPLcs_chr1;BAPLcs_chr1;BAPLcs_chr1;BAPLcs_chr1;BAPLcs_chr1;BAPLcs_chr1;BAPLcs_chr1;BAPLcs_chr1;BAPLcs_chr1;BAPLcs_chr1;BAPLcs_chr1;BAPLcs_chr1;BAPLcs_chr1;BAPLcs_chr1	40101628;40101628;40101628;40105165;40105165;40105165;40105774;40105774;40105774;40106256;40106256;40106256;40109272;40109272;40110185;40110185;40113227;40418560;40420972	40101722;40101722;40101722;40105250;40105250;40105250;40105882;40105882;40105882;40106305;40106305;40106305;40109331;40109331;40110294;40110290;40113239;40418665;40420984	+;+;+;+;+;+;+;+;+;+;+;+;+;+;+;+;+;+;+	642	2	31	2	16	4	11
CSbapl.2302	BAPLcs_chr1;BAPLcs_chr1;BAPLcs_chr1	40113938;40116585;40120943	40114099;40116726;40121058	-;-;-	420	2	0	2	5	4	74
CSbapl.2307	BAPLcs_chr1;BAPLcs_chr1;BAPLcs_chr1;BAPLcs_chr1;BAPLcs_chr1;BAPLcs_chr1;BAPLcs_chr1;BAPLcs_chr1;BAPLcs_chr1;BAPLcs_chr1;BAPLcs_chr1;BAPLcs_chr1;BAPLcs_chr1;BAPLcs_chr1;BAPLcs_chr1;BAPLcs_chr1;BAPLcs_chr1	40421734;40423255;40428973;40429936;40431803;40432631;40433943;40434582;40443086;40443404;40444531;40446858;40447754;40449014;40452251;40454318;40455639	40421850;40423426;40429190;40430002;40432001;40432739;40434112;40434732;40443159;40443554;40444649;40446977;40448083;40449168;40452323;40454491;40455783	-;-;-;-;-;-;-;-;-;-;-;-;-;-;-;-;-	2544	8	0	0	1	1	117
CSbapl.2311	BAPLcs_chr1;BAPLcs_chr1	40516003;40517331	40516175;40517883	+;+	726	23	32	17	343	595	537
CSbapl.2312	BAPLcs_chr1;BAPLcs_chr1;BAPLcs_chr1;BAPLcs_chr1;BAPLcs_chr1;BAPLcs_chr1;BAPLcs_chr1	40530934;40531439;40531861;40532341;40532780;40546225;40547886	40531076;40531571;40532025;40532520;40533049;40546352;40548438	+;+;+;+;+;+;+	1572	8	197	10	26	7	26
CSbapl.2314	BAPLcs_chr1;BAPLcs_chr1;BAPLcs_chr1;BAPLcs_chr1;BAPLcs_chr1;BAPLcs_chr1;BAPLcs_chr1;BAPLcs_chr1;BAPLcs_chr1;BAPLcs_chr1;BAPLcs_chr1;BAPLcs_chr1;BAPLcs_chr1;BAPLcs_chr1;BAPLcs_chr1;BAPLcs_chr1;BAPLcs_chr1;BAPLcs_chr1;BAPLcs_chr1;BAPLcs_chr1;BAPLcs_chr1;BAPLcs_chr1	40573496;40574492;40576651;40577660;40578465;40579461;40580245;40582401;40588653;40591264;40591792;40596117;40596704;40599133;40599483;40601944;40603013;40606117;40608643;40609667;40611315;40615347	40573556;40574536;40576692;40577730;40578524;40579581;40580378;40582478;40588753;40591326;40591891;40596153;40596774;40599183;40599554;40602035;40603114;40606222;40608757;40609790;40611378;40615508	+;+;+;+;+;+;+;+;+;+;+;+;+;+;+;+;+;+;+;+;+;+	1872	6	20	15	50	100	43
CSbapl.2315	BAPLcs_chr1	40592034	40592849	+	816	1	0	1	2	0	3
CSbapl.2316	BAPLcs_chr1	40593321	40595039	+	1719	3	2	14	2	0	0
CSbapl.2319	BAPLcs_chr1;BAPLcs_chr1;BAPLcs_chr1;BAPLcs_chr1;BAPLcs_chr1;BAPLcs_chr1;BAPLcs_chr1;BAPLcs_chr1;BAPLcs_chr1;BAPLcs_chr1;BAPLcs_chr1;BAPLcs_chr1;BAPLcs_chr1;BAPLcs_chr1;BAPLcs_chr1;BAPLcs_chr1;BAPLcs_chr1;BAPLcs_chr1;BAPLcs_chr1;BAPLcs_chr1;BAPLcs_chr1;BAPLcs_chr1	40634260;40640570;40640614;40645704;40647957;40647957;40650764;40650764;40652071;40653556;40656520;40656520;40657621;40657621;40670237;40670237;40677656;40677656;40680323;40680323;40685529;40685529	40634267;40640712;40640712;40646789;40647998;40647998;40650805;40650805;40652133;40653594;40656594;40656594;40657670;40657670;40670300;40670300;40677964;40677964;40680503;40680503;40685567;40685567	-;-;-;-;-;-;-;-;-;-;-;-;-;-;-;-;-;-;-;-;-;-	2141	4	58	5	3	9	2
CSbapl.2321	BAPLcs_chr1	40648571	40649497	+	927	4	2	1	2	2	0
CSbapl.2324	BAPLcs_chr1;BAPLcs_chr1;BAPLcs_chr1;BAPLcs_chr1;BAPLcs_chr1;BAPLcs_chr1;BAPLcs_chr1;BAPLcs_chr1;BAPLcs_chr1;BAPLcs_chr1;BAPLcs_chr1;BAPLcs_chr1;BAPLcs_chr1;BAPLcs_chr1	40740096;40740096;40742330;40742330;40750047;40750047;40750718;40750718;40751961;40751961;40752475;40752475;40755368;40759208	40740154;40740154;40742458;40742458;40750212;40750212;40751026;40751026;40752144;40752144;40752555;40752563;40755471;40759477	+;+;+;+;+;+;+;+;+;+;+;+;+;+	1310	59	193	40	32	23	27
CSbapl.2325	BAPLcs_chr1;BAPLcs_chr1;BAPLcs_chr1;BAPLcs_chr1;BAPLcs_chr1;BAPLcs_chr1;BAPLcs_chr1;BAPLcs_chr1;BAPLcs_chr1;BAPLcs_chr1;BAPLcs_chr1;BAPLcs_chr1;BAPLcs_chr1;BAPLcs_chr1;BAPLcs_chr1;BAPLcs_chr1;BAPLcs_chr1;BAPLcs_chr1;BAPLcs_chr1;BAPLcs_chr1;BAPLcs_chr1;BAPLcs_chr1;BAPLcs_chr1;BAPLcs_chr1;BAPLcs_chr1;BAPLcs_chr1;BAPLcs_chr1;BAPLcs_chr1;BAPLcs_chr1;BAPLcs_chr1;BAPLcs_chr1;BAPLcs_chr1;BAPLcs_chr1;BAP…	40765642;40765642;40766609;40766613;40766613;40768073;40768073;40768073;40769054;40769054;40769054;40770302;40770302;40770302;40772775;40772775;40772775;40773814;40773814;40773814;40774479;40774479;40774479;40775334;40775334;40775334;40775789;40775789;40775789;40786023;40786023;40790571;40790571;40791367;40791367;40792036;40792036;40792747;40792747;40794078;40794078;40797463;40797463;40799465;407…	40765669;40765669;40766702;40766702;40766702;40768185;40768185;40768185;40769177;40769177;40769177;40770363;40770363;40770363;40772894;40772894;40772894;40773918;40773918;40773918;40774556;40774556;40774556;40775398;40775398;40775398;40775966;40775967;40775967;40786126;40786126;40790621;40790621;40791518;40791518;40792150;40792150;40792920;40792920;40794165;40794165;40797510;40797510;40799574;407…	-;-;-;-;-;-;-;-;-;-;-;-;-;-;-;-;-;-;-;-;-;-;-;-;-;-;-;-;-;-;-;-;-;-;-;-;-;-;-;-;-;-;-;-;-;-;-;-;-;-;-;-;-;-;-;-	2746	200	198	165	2109	1614	1719
CSbapl.2328	BAPLcs_chr1;BAPLcs_chr1;BAPLcs_chr1;BAPLcs_chr1;BAPLcs_chr1;BAPLcs_chr1;BAPLcs_chr1;BAPLcs_chr1;BAPLcs_chr1;BAPLcs_chr1;BAPLcs_chr1;BAPLcs_chr1;BAPLcs_chr1;BAPLcs_chr1;BAPLcs_chr1;BAPLcs_chr1;BAPLcs_chr1;BAPLcs_chr1;BAPLcs_chr1;BAPLcs_chr1;BAPLcs_chr1;BAPLcs_chr1;BAPLcs_chr1;BAPLcs_chr1;BAPLcs_chr1;BAPLcs_chr1;BAPLcs_chr1;BAPLcs_chr1;BAPLcs_chr1;BAPLcs_chr1;BAPLcs_chr1;BAPLcs_chr1;BAPLcs_chr1;BAP…	40836166;40836166;40837140;40837140;40839060;40839060;40841154;40841154;40844154;40844154;40844990;40844990;40845698;40845698;40846538;40846538;40847163;40847163;40848246;40848246;40849532;40849532;40851558;40851558;40852774;40852774;40853674;40853674;40859722;40860728;40862847;40865978;40866975;40869187;40869858;40872368;40873210;40880518	40836280;40836280;40837249;40837249;40839170;40839170;40841274;40841274;40844244;40844244;40845121;40845121;40845842;40845842;40846645;40846645;40847250;40847250;40848325;40848325;40849694;40849694;40851742;40851742;40852840;40852840;40853778;40853753;40859765;40860945;40863012;40866045;40867114;40869266;40869967;40872482;40873308;40880580	-;-;-;-;-;-;-;-;-;-;-;-;-;-;-;-;-;-;-;-;-;-;-;-;-;-;-;-;-;-;-;-;-;-;-;-;-;-	2724	533	826	420	623	1281	1409
CSbapl.2329	BAPLcs_chr1;BAPLcs_chr1;BAPLcs_chr1;BAPLcs_chr1;BAPLcs_chr1;BAPLcs_chr1;BAPLcs_chr1;BAPLcs_chr1;BAPLcs_chr1;BAPLcs_chr1;BAPLcs_chr1;BAPLcs_chr1;BAPLcs_chr1;BAPLcs_chr1;BAPLcs_chr1;BAPLcs_chr1;BAPLcs_chr1;BAPLcs_chr1;BAPLcs_chr1;BAPLcs_chr1;BAPLcs_chr1;BAPLcs_chr1;BAPLcs_chr1;BAPLcs_chr1;BAPLcs_chr1;BAPLcs_chr1;BAPLcs_chr1	40888518;40888891;40892966;40894002;40895408;40897186;40899552;40899964;40901500;40902714;40904235;40909818;40910818;40910818;40913043;40917513;40917513;40917602;40918314;40918314;40918314;40919767;40919767;40919767;40920525;40920525;40920525	40888581;40889029;40893087;40894134;40895547;40897384;40899673;40900114;40901639;40903109;40904348;40909842;40910928;40910928;40913438;40917626;40917626;40917626;40918424;40918424;40918424;40919892;40919892;40919892;40920952;40920952;40920952	+;+;+;+;+;+;+;+;+;+;+;+;+;+;+;+;+;+;+;+;+;+;+;+;+;+;+	3031	1020	1399	675	341	971	647
CSbapl.2332	BAPLcs_chr1;BAPLcs_chr1;BAPLcs_chr1;BAPLcs_chr1;BAPLcs_chr1;BAPLcs_chr1;BAPLcs_chr1;BAPLcs_chr1;BAPLcs_chr1;BAPLcs_chr1;BAPLcs_chr1;BAPLcs_chr1;BAPLcs_chr1;BAPLcs_chr1;BAPLcs_chr1;BAPLcs_chr1;BAPLcs_chr1;BAPLcs_chr1;BAPLcs_chr1;BAPLcs_chr1;BAPLcs_chr1;BAPLcs_chr1	40925948;40925948;40926702;40926702;40927688;40927688;40928327;40928327;40928967;40928967;40930177;40930177;40932009;40932009;40933200;40933200;40933690;40933690;40934976;40934976;40936308;40936308	40926098;40926098;40926854;40926854;40927791;40927791;40928445;40928445;40929059;40929059;40930309;40930309;40932099;40932099;40933288;40933288;40933789;40933789;40935074;40935074;40936639;40936636	-;-;-;-;-;-;-;-;-;-;-;-;-;-;-;-;-;-;-;-;-;-	1464	344	350	244	195	234	329
CSbapl.2333	BAPLcs_chr1;BAPLcs_chr1;BAPLcs_chr1;BAPLcs_chr1;BAPLcs_chr1;BAPLcs_chr1;BAPLcs_chr1;BAPLcs_chr1;BAPLcs_chr1;BAPLcs_chr1;BAPLcs_chr1;BAPLcs_chr1;BAPLcs_chr1;BAPLcs_chr1;BAPLcs_chr1;BAPLcs_chr1;BAPLcs_chr1;BAPLcs_chr1;BAPLcs_chr1;BAPLcs_chr1;BAPLcs_chr1;BAPLcs_chr1;BAPLcs_chr1;BAPLcs_chr1;BAPLcs_chr1;BAPLcs_chr1	40939932;40941149;40942175;40943238;40944035;40944417;40945288;40945772;40947292;40948286;40948301;40948928;40948928;40949536;40949536;40950390;40950390;40951264;40951264;40951758;40951758;40952005;40953180;40953180;40956715;40956715	40940072;40941213;40942280;40943384;40944106;40944470;40945441;40945898;40947379;40948380;40948380;40949035;40949035;40949674;40949674;40950546;40950546;40951319;40951319;40951961;40951961;40952307;40953881;40953881;40956780;40956780	+;+;+;+;+;+;+;+;+;+;+;+;+;+;+;+;+;+;+;+;+;+;+;+;+;+	2784	476	476	437	452	451	588
CSbapl.2334	BAPLcs_chr1;BAPLcs_chr1	40958503;40963025	40958813;40963031	-;-	318	7	7	2	3	0	4
CSbapl.2335	BAPLcs_chr1;BAPLcs_chr1	40975229;40980676	40975612;40980921	-;-	630	0	2	0	0	0	0
CSbapl.2336	BAPLcs_chr1	40982442	40982834	-	393	2	0	0	2	0	6
CSbapl.2338	BAPLcs_chr1;BAPLcs_chr1;BAPLcs_chr1	41002845;41007347;41008479	41002880;41007543;41008623	-;-;-	378	0	0	0	3	2	6
CSbapl.2342	BAPLcs_chr1;BAPLcs_chr1;BAPLcs_chr1;BAPLcs_chr1;BAPLcs_chr1;BAPLcs_chr1;BAPLcs_chr1;BAPLcs_chr1;BAPLcs_chr1	41015493;41017210;41018096;41019278;41020864;41021624;41022867;41028828;41031616	41015705;41017288;41018171;41019449;41020925;41021703;41023099;41028906;41031695	-;-;-;-;-;-;-;-;-	1074	0	0	0	0	8	7
CSbapl.2350	BAPLcs_chr1	41078657	41079532	-	876	32	33	22	62	20	44
CSbapl.2351	BAPLcs_chr1;BAPLcs_chr1;BAPLcs_chr1;BAPLcs_chr1;BAPLcs_chr1;BAPLcs_chr1;BAPLcs_chr1;BAPLcs_chr1;BAPLcs_chr1;BAPLcs_chr1;BAPLcs_chr1;BAPLcs_chr1	41080423;41080423;41081971;41081971;41083098;41083098;41086407;41086407;41087740;41087740;41089298;41089298	41080628;41080628;41082092;41082092;41083161;41083161;41086527;41086527;41087835;41087835;41089441;41089441	-;-;-;-;-;-;-;-;-;-;-;-	753	20	26	19	15	10	18
CSbapl.2353	BAPLcs_chr1;BAPLcs_chr1;BAPLcs_chr1;BAPLcs_chr1;BAPLcs_chr1;BAPLcs_chr1;BAPLcs_chr1;BAPLcs_chr1;BAPLcs_chr1;BAPLcs_chr1;BAPLcs_chr1;BAPLcs_chr1;BAPLcs_chr1;BAPLcs_chr1;BAPLcs_chr1;BAPLcs_chr1;BAPLcs_chr1;BAPLcs_chr1;BAPLcs_chr1;BAPLcs_chr1;BAPLcs_chr1;BAPLcs_chr1;BAPLcs_chr1;BAPLcs_chr1;BAPLcs_chr1;BAPLcs_chr1;BAPLcs_chr1;BAPLcs_chr1;BAPLcs_chr1;BAPLcs_chr1;BAPLcs_chr1;BAPLcs_chr1;BAPLcs_chr1;BAP…	41097848;41097848;41097848;41097848;41097848;41098583;41098583;41098583;41098583;41098583;41099419;41099419;41099419;41099419;41099419;41100273;41100273;41100273;41100273;41100273;41101391;41101391;41101391;41101391;41101391;41101885;41101885;41101885;41101885;41101885;41105445;41105445;41105445;41105445;41105445;41105953;41105953;41105953;41105953;41105953;41129414;41129414;41129414;41129414;411…	41097925;41097925;41097925;41097925;41097925;41098684;41098684;41098684;41098684;41098684;41099484;41099484;41099484;41099484;41099484;41100426;41100426;41100426;41100426;41100426;41101455;41101455;41101455;41101455;41101455;41102009;41102009;41102009;41102009;41102009;41105543;41105543;41105543;41105543;41105543;41106041;41106041;41106041;41106041;41106041;41129487;41129489;41129481;41129481;411…	-;-;-;-;-;-;-;-;-;-;-;-;-;-;-;-;-;-;-;-;-;-;-;-;-;-;-;-;-;-;-;-;-;-;-;-;-;-;-;-;-;-;-;-;-;-;-	970	1013	875	864	387	503	601
CSbapl.2354	BAPLcs_chr1	41126054	41127232	+	1179	0	4	0	2	0	2
CSbapl.2355	BAPLcs_chr1;BAPLcs_chr1;BAPLcs_chr1;BAPLcs_chr1;BAPLcs_chr1;BAPLcs_chr1;BAPLcs_chr1;BAPLcs_chr1;BAPLcs_chr1;BAPLcs_chr1;BAPLcs_chr1;BAPLcs_chr1;BAPLcs_chr1;BAPLcs_chr1;BAPLcs_chr1;BAPLcs_chr1;BAPLcs_chr1;BAPLcs_chr1;BAPLcs_chr1;BAPLcs_chr1;BAPLcs_chr1;BAPLcs_chr1;BAPLcs_chr1;BAPLcs_chr1;BAPLcs_chr1;BAPLcs_chr1;BAPLcs_chr1;BAPLcs_chr1;BAPLcs_chr1;BAPLcs_chr1;BAPLcs_chr1;BAPLcs_chr1;BAPLcs_chr1;BAP…	41133072;41133072;41134445;41134445;41137086;41137086;41139695;41139695;41141155;41141155;41142301;41142301;41142345;41143057;41143057;41143057;41144888;41144888;41144888;41150189;41150189;41150189;41150675;41150677;41152164;41152793;41153906;41153906;41153906;41154978;41154978;41154978;41155588;41155588;41155588;41158334;41158334;41158334;41169698;41169698;41169698;41170486;41170486;41170486;411…	41133135;41133135;41134486;41134486;41137159;41137159;41139769;41139769;41141230;41141230;41142433;41142433;41142433;41143122;41143122;41143122;41145011;41145011;41145011;41150288;41150288;41150288;41151013;41151384;41152332;41153742;41153964;41153964;41153964;41155042;41155042;41155042;41155683;41155683;41155683;41158376;41158376;41158376;41169812;41169812;41169812;41170567;41170567;41170567;411…	+;+;+;+;+;+;+;+;+;+;+;+;+;+;+;+;+;+;+;+;+;+;+;+;+;+;+;+;+;+;+;+;+;+;+;+;+;+;+;+;+;+;+;+;+;+;+;+;+;+;+;+	3441	103	204	133	321	277	377
CSbapl.2373	BAPLcs_chr1	41298382	41299827	+	1446	8	20	4	0	2	1
CSbapl.2376	BAPLcs_chr1	41318571	41320559	-	1989	231	176	177	1578	1527	1583
CSbapl.2377	BAPLcs_chr1;BAPLcs_chr1;BAPLcs_chr1;BAPLcs_chr1;BAPLcs_chr1;BAPLcs_chr1;BAPLcs_chr1;BAPLcs_chr1;BAPLcs_chr1;BAPLcs_chr1;BAPLcs_chr1;BAPLcs_chr1;BAPLcs_chr1;BAPLcs_chr1;BAPLcs_chr1;BAPLcs_chr1	41333916;41338399;41339368;41340424;41341764;41344603;41345052;41346282;41347825;41348972;41352077;41356872;41357445;41361098;41365886;41367891	41337691;41338541;41339551;41340640;41341815;41344682;41345156;41346358;41348209;41350686;41352168;41356948;41357573;41361190;41365980;41368035	-;-;-;-;-;-;-;-;-;-;-;-;-;-;-;-	7365	218	299	115	480	501	571
CSbapl.2378	BAPLcs_chr1	41370535	41370909	-	375	0	0	2	0	0	0
CSbapl.2381	BAPLcs_chr1;BAPLcs_chr1;BAPLcs_chr1;BAPLcs_chr1;BAPLcs_chr1;BAPLcs_chr1;BAPLcs_chr1	41393272;41395050;41396127;41397917;41398842;41403557;41408189	41393450;41395196;41396290;41398018;41398956;41403698;41408332	-;-;-;-;-;-;-	993	2	3	0	2	0	1
CSbapl.2384	BAPLcs_chr1;BAPLcs_chr1;BAPLcs_chr1;BAPLcs_chr1;BAPLcs_chr1;BAPLcs_chr1;BAPLcs_chr1;BAPLcs_chr1;BAPLcs_chr1;BAPLcs_chr1;BAPLcs_chr1;BAPLcs_chr1;BAPLcs_chr1;BAPLcs_chr1;BAPLcs_chr1;BAPLcs_chr1;BAPLcs_chr1	41408932;41441661;41444175;41445522;41447226;41448342;41449456;41450676;41451795;41452935;41453330;41463881;41464621;41466620;41467563;41468483;41469566	41408954;41441809;41444247;41445610;41447411;41448683;41449575;41450885;41451913;41453085;41453403;41463989;41464819;41466686;41467780;41468624;41469775	+;+;+;+;+;+;+;+;+;+;+;+;+;+;+;+;+	2481	15	0	0	2	0	144
CSbapl.2385	BAPLcs_chr1;BAPLcs_chr1;BAPLcs_chr1;BAPLcs_chr1;BAPLcs_chr1;BAPLcs_chr1;BAPLcs_chr1	41470428;41471958;41474260;41477303;41477726;41478358;41481681	41470440;41472063;41474319;41477352;41477834;41478443;41481775	-;-;-;-;-;-;-	519	8	9	14	8	2	23
CSbapl.2388	BAPLcs_chr1	41498793	41499275	+	483	0	0	0	2	0	1
CSbapl.2389	BAPLcs_chr1	41499631	41499990	+	360	0	0	0	2	0	0
CSbapl.2390	BAPLcs_chr1	41501066	41501620	+	555	0	0	0	10	0	4
CSbapl.2391	BAPLcs_chr1;BAPLcs_chr1	41511632;41512702	41511900;41512924	+;+	492	0	2	2	10	8	91
CSbapl.2392	BAPLcs_chr1;BAPLcs_chr1;BAPLcs_chr1;BAPLcs_chr1;BAPLcs_chr1	41515469;41516055;41516802;41517166;41517893	41515692;41516203;41516973;41517423;41518052	-;-;-;-;-	963	2	5	6	31	67	106
CSbapl.2393	BAPLcs_chr1;BAPLcs_chr1;BAPLcs_chr1;BAPLcs_chr1;BAPLcs_chr1;BAPLcs_chr1;BAPLcs_chr1;BAPLcs_chr1;BAPLcs_chr1;BAPLcs_chr1;BAPLcs_chr1	41544149;41546706;41549145;41561009;41579742;41581834;41584787;41586248;41587583;41587933;41588391	41544187;41546904;41549453;41561066;41579791;41581908;41584825;41586310;41587624;41588013;41588434	+;+;+;+;+;+;+;+;+;+;+	999	0	9	8	11	6	8
CSbapl.2395	BAPLcs_chr1;BAPLcs_chr1;BAPLcs_chr1;BAPLcs_chr1;BAPLcs_chr1;BAPLcs_chr1;BAPLcs_chr1;BAPLcs_chr1;BAPLcs_chr1;BAPLcs_chr1;BAPLcs_chr1;BAPLcs_chr1;BAPLcs_chr1;BAPLcs_chr1;BAPLcs_chr1;BAPLcs_chr1;BAPLcs_chr1;BAPLcs_chr1;BAPLcs_chr1;BAPLcs_chr1;BAPLcs_chr1;BAPLcs_chr1;BAPLcs_chr1;BAPLcs_chr1;BAPLcs_chr1;BAPLcs_chr1;BAPLcs_chr1;BAPLcs_chr1;BAPLcs_chr1;BAPLcs_chr1;BAPLcs_chr1;BAPLcs_chr1;BAPLcs_chr1;BAP…	41631312;41632472;41634850;41635710;41636515;41637421;41637492;41641266;41641266;41642862;41642862;41643669;41643669;41645886;41645886;41649155;41649155;41653405;41653405;41657073;41657073;41657445;41657445;41659854;41659854;41660561;41660561;41665174;41665740;41668311;41674585;41674585;41676726;41676726;41677523;41677523;41678580;41678580;41679358;41679358;41680410;41680410;41682474;41682474;416…	41631365;41632503;41634935;41635828;41636591;41637582;41637582;41641329;41641329;41642985;41642985;41643783;41643783;41645991;41645991;41649256;41649256;41653496;41653496;41657144;41657144;41657495;41657495;41659924;41659924;41660597;41660597;41665273;41665802;41668411;41674662;41674662;41676859;41676859;41677643;41677643;41678639;41678639;41679428;41679428;41680451;41680451;41682518;41682518;416…	-;-;-;-;-;-;-;-;-;-;-;-;-;-;-;-;-;-;-;-;-;-;-;-;-;-;-;-;-;-;-;-;-;-;-;-;-;-;-;-;-;-;-;-;-;-	2243	36	43	22	55	54	83
CSbapl.2396	BAPLcs_chr1	41671663	41672820	+	1158	0	2	1	0	1	0
CSbapl.2398	BAPLcs_chr1;BAPLcs_chr1;BAPLcs_chr1;BAPLcs_chr1;BAPLcs_chr1;BAPLcs_chr1;BAPLcs_chr1;BAPLcs_chr1;BAPLcs_chr1	41708567;41710653;41723298;41723952;41724481;41724976;41725430;41725925;41736097	41709119;41710780;41723531;41724221;41724660;41725140;41725562;41726174;41736139	-;-;-;-;-;-;-;-;-	1956	10	214	37	110	151	122
CSbapl.2402	BAPLcs_chr1	41738712	41739179	-	468	7	11	6	122	210	164
CSbapl.2403	BAPLcs_chr1	41740207	41740638	-	432	5	5	5	35	51	26
CSbapl.2404	BAPLcs_chr1;BAPLcs_chr1;BAPLcs_chr1;BAPLcs_chr1;BAPLcs_chr1;BAPLcs_chr1;BAPLcs_chr1;BAPLcs_chr1	41746685;41753907;41754879;41755594;41764125;41764865;41767595;41769155	41746798;41754006;41755087;41755758;41764223;41764951;41767777;41769532	+;+;+;+;+;+;+;+	1335	128	140	164	288	307	246
CSbapl.2408	BAPLcs_chr1;BAPLcs_chr1;BAPLcs_chr1;BAPLcs_chr1;BAPLcs_chr1;BAPLcs_chr1;BAPLcs_chr1;BAPLcs_chr1;BAPLcs_chr1;BAPLcs_chr1	41778911;41778911;41779986;41780033;41780033;41781675;41781675;41781675;41790052;41790052	41779146;41779146;41780152;41780152;41780152;41781876;41781684;41781876;41790111;41790111	-;-;-;-;-;-;-;-;-;-	665	1149	1146	804	678	1241	997
CSbapl.2411	BAPLcs_chr1;BAPLcs_chr1;BAPLcs_chr1;BAPLcs_chr1;BAPLcs_chr1;BAPLcs_chr1;BAPLcs_chr1	41805593;41806767;41806892;41808308;41808308;41812081;41812081	41805825;41807011;41807011;41808509;41808509;41812146;41812146	-;-;-;-;-;-;-	746	467	641	203	164	608	235
CSbapl.2414	BAPLcs_chr1;BAPLcs_chr1;BAPLcs_chr1;BAPLcs_chr1;BAPLcs_chr1;BAPLcs_chr1;BAPLcs_chr1;BAPLcs_chr1;BAPLcs_chr1;BAPLcs_chr1;BAPLcs_chr1;BAPLcs_chr1;BAPLcs_chr1;BAPLcs_chr1;BAPLcs_chr1;BAPLcs_chr1;BAPLcs_chr1;BAPLcs_chr1;BAPLcs_chr1;BAPLcs_chr1;BAPLcs_chr1;BAPLcs_chr1;BAPLcs_chr1;BAPLcs_chr1;BAPLcs_chr1;BAPLcs_chr1;BAPLcs_chr1;BAPLcs_chr1;BAPLcs_chr1;BAPLcs_chr1;BAPLcs_chr1;BAPLcs_chr1;BAPLcs_chr1;BAP…	41820797;41827302;41828274;41833184;41833975;41841028;41845267;41846014;41846576;41848571;41853695;41857129;41857781;41858788;41859668;41860554;41861346;41863474;41864687;41865433;41866261;41867966;41868804;41871109;41878201;41878910;41879956;41881233;41882244;41885155;41886127;41886532;41887246;41890275;41891009;41894263;41895586;41896419;41897268;41898241;41898651;41899939;41900851;41903162;419…	41821426;41827531;41828550;41833303;41834184;41841168;41845460;41846116;41846737;41848793;41853891;41857255;41857902;41858949;41859835;41860718;41861492;41863693;41864871;41865642;41866425;41868133;41868968;41871255;41878390;41879139;41880201;41881397;41882418;41885303;41886261;41886774;41887416;41890523;41891164;41894418;41895750;41896565;41897421;41898461;41898887;41900118;41901168;41903317;419…	+;+;+;+;+;+;+;+;+;+;+;+;+;+;+;+;+;+;+;+;+;+;+;+;+;+;+;+;+;+;+;+;+;+;+;+;+;+;+;+;+;+;+;+;+;+;+;+;+;+;+;+;+;+;+;+;+;+;+;+	12099	542	472	541	477	591	705
CSbapl.2420	BAPLcs_chr1;BAPLcs_chr1;BAPLcs_chr1;BAPLcs_chr1;BAPLcs_chr1;BAPLcs_chr1;BAPLcs_chr1;BAPLcs_chr1;BAPLcs_chr1;BAPLcs_chr1;BAPLcs_chr1;BAPLcs_chr1;BAPLcs_chr1;BAPLcs_chr1;BAPLcs_chr1;BAPLcs_chr1;BAPLcs_chr1;BAPLcs_chr1;BAPLcs_chr1;BAPLcs_chr1;BAPLcs_chr1;BAPLcs_chr1;BAPLcs_chr1;BAPLcs_chr1	41942712;41943574;41944112;41945087;41948312;41949486;41950450;41951511;41951572;41957986;41989565;41990447;41990985;41991945;41993787;41993787;41994914;41994914;41995878;41995878;41996937;41996937;42009040;42009040	41942801;41943643;41944256;41945192;41948414;41949742;41950509;41951622;41951622;41958071;41989654;41990516;41991129;41992050;41993889;41993889;41995170;41995170;41995937;41995937;41997048;41997048;42009125;42009125	-;-;-;-;-;-;-;-;-;-;-;-;-;-;-;-;-;-;-;-;-;-;-;-	2058	2027	1384	1797	1106	1110	1492
CSbapl.2421	BAPLcs_chr1;BAPLcs_chr1;BAPLcs_chr1;BAPLcs_chr1;BAPLcs_chr1;BAPLcs_chr1;BAPLcs_chr1;BAPLcs_chr1;BAPLcs_chr1;BAPLcs_chr1;BAPLcs_chr1;BAPLcs_chr1;BAPLcs_chr1;BAPLcs_chr1	41958236;41959317;41959335;41960931;41960931;41961694;41961694;41962340;41962340;42009290;42010391;42011976;42012732;42013379	41958313;41959407;41959407;41961037;41961037;41961726;41961726;41962429;41962429;42009367;42010463;42012082;42012764;42013468	+;+;+;+;+;+;+;+;+;+;+;+;+;+	780	350	267	281	417	381	351
CSbapl.2422	BAPLcs_chr1;BAPLcs_chr1;BAPLcs_chr1;BAPLcs_chr1;BAPLcs_chr1;BAPLcs_chr1;BAPLcs_chr1	41970430;41971095;41971903;41973384;41975952;41976794;41977712	41970542;41971237;41972032;41973527;41976130;41976879;41978221	-;-;-;-;-;-;-	1305	0	3	4	1	12	8
CSbapl.2423	BAPLcs_chr1;BAPLcs_chr1;BAPLcs_chr1;BAPLcs_chr1;BAPLcs_chr1;BAPLcs_chr1;BAPLcs_chr1;BAPLcs_chr1	42020458;42021515;42022140;42022960;42024440;42026096;42026939;42027628	42020560;42021587;42022282;42023089;42024583;42026274;42027024;42028155	-;-;-;-;-;-;-;-	1386	0	3	12	1	55	10
CSbapl.2424	BAPLcs_chr1;BAPLcs_chr1;BAPLcs_chr1;BAPLcs_chr1;BAPLcs_chr1;BAPLcs_chr1;BAPLcs_chr1;BAPLcs_chr1;BAPLcs_chr1;BAPLcs_chr1;BAPLcs_chr1;BAPLcs_chr1;BAPLcs_chr1	42031183;42043342;42043605;42044322;42046048;42047627;42050104;42050779;42050799;42051413;42051413;42058129;42058129	42031382;42043406;42044252;42044403;42046190;42047756;42050247;42050983;42050983;42051498;42051498;42059121;42059121	-;-;-;-;-;-;-;-;-;-;-;-;-	2696	45	61	29	23	57	36
CSbapl.2428	BAPLcs_chr1;BAPLcs_chr1;BAPLcs_chr1;BAPLcs_chr1;BAPLcs_chr1;BAPLcs_chr1;BAPLcs_chr1;BAPLcs_chr1;BAPLcs_chr1;BAPLcs_chr1;BAPLcs_chr1;BAPLcs_chr1;BAPLcs_chr1;BAPLcs_chr1;BAPLcs_chr1;BAPLcs_chr1;BAPLcs_chr1;BAPLcs_chr1;BAPLcs_chr1;BAPLcs_chr1;BAPLcs_chr1;BAPLcs_chr1;BAPLcs_chr1;BAPLcs_chr1;BAPLcs_chr1;BAPLcs_chr1	42086727;42086727;42087488;42087488;42088432;42088432;42095867;42095867;42102636;42102786;42102786;42103892;42103892;42103892;42104668;42104668;42109103;42109103;42110988;42110988;42111375;42111375;42112718;42112718;42127686;42127686	42086909;42086909;42087624;42087624;42088550;42088550;42096069;42096069;42102899;42102899;42102899;42104122;42104072;42104072;42104745;42104745;42109305;42109305;42111180;42111180;42111583;42111583;42112849;42112849;42127715;42127856	-;-;-;-;-;-;-;-;-;-;-;-;-;-;-;-;-;-;-;-;-;-;-;-;-;-	2123	94	141	67	60	129	86
CSbapl.2432	BAPLcs_chr1;BAPLcs_chr1;BAPLcs_chr1;BAPLcs_chr1;BAPLcs_chr1;BAPLcs_chr1;BAPLcs_chr1;BAPLcs_chr1;BAPLcs_chr1;BAPLcs_chr1;BAPLcs_chr1;BAPLcs_chr1;BAPLcs_chr1;BAPLcs_chr1;BAPLcs_chr1;BAPLcs_chr1;BAPLcs_chr1;BAPLcs_chr1;BAPLcs_chr1	42146139;42146139;42146139;42148317;42148317;42148317;42152580;42152580;42152580;42155398;42155398;42155398;42156681;42156681;42156681;42159669;42159669;42159669;42168324	42146219;42146219;42146219;42148403;42148403;42148403;42152695;42152695;42152695;42155616;42155616;42155616;42156822;42156822;42156822;42159809;42159809;42159806;42168497	-;-;-;-;-;-;-;-;-;-;-;-;-;-;-;-;-;-;-	960	65193	59113	53087	25237	58136	59906
CSbapl.2433	BAPLcs_chr1;BAPLcs_chr1;BAPLcs_chr1;BAPLcs_chr1;BAPLcs_chr1;BAPLcs_chr1;BAPLcs_chr1;BAPLcs_chr1;BAPLcs_chr1;BAPLcs_chr1;BAPLcs_chr1;BAPLcs_chr1;BAPLcs_chr1;BAPLcs_chr1;BAPLcs_chr1;BAPLcs_chr1;BAPLcs_chr1;BAPLcs_chr1;BAPLcs_chr1;BAPLcs_chr1;BAPLcs_chr1;BAPLcs_chr1;BAPLcs_chr1;BAPLcs_chr1;BAPLcs_chr1;BAPLcs_chr1;BAPLcs_chr1;BAPLcs_chr1;BAPLcs_chr1;BAPLcs_chr1;BAPLcs_chr1;BAPLcs_chr1;BAPLcs_chr1;BAP…	42169167;42169167;42173257;42173257;42174966;42176321;42176321;42177015;42177015;42180310;42180310;42180312;42180312;42180788;42180788;42180788;42180788;42184402;42184402;42184402;42184402;42184752;42184752;42184752;42184752;42187965;42187965;42187965;42187965;42188920;42188920;42188920;42188920;42189438;42189438;42189438;42189438;42189501;42191060;42191060;42191060;42191060;42191060;42194619;421…	42169283;42169283;42173308;42173308;42175028;42176431;42176431;42177104;42177104;42180508;42180508;42180508;42180508;42181135;42181135;42181135;42181135;42184501;42184501;42184501;42184501;42184887;42184887;42184887;42184887;42188044;42188044;42188044;42188044;42189015;42189015;42189015;42189015;42189598;42189598;42189598;42189598;42189598;42191204;42191204;42191204;42191204;42191204;42194763;421…	+;+;+;+;+;+;+;+;+;+;+;+;+;+;+;+;+;+;+;+;+;+;+;+;+;+;+;+;+;+;+;+;+;+;+;+;+;+;+;+;+;+;+;+;+;+;+;+;+;+;+;+;+;+;+;+;+;+;+;+;+;+;+;+;+;+;+;+;+;+;+;+;+;+;+;+;+;+;+;+	3717	379	520	290	756	891	822
CSbapl.2434	BAPLcs_chr1;BAPLcs_chr1;BAPLcs_chr1;BAPLcs_chr1;BAPLcs_chr1;BAPLcs_chr1;BAPLcs_chr1;BAPLcs_chr1;BAPLcs_chr1	42214840;42217460;42218405;42220397;42220946;42221682;42222612;42223532;42227029	42214872;42217567;42218640;42220552;42221100;42221843;42222781;42223645;42227034	-;-;-;-;-;-;-;-;-	1140	618	953	533	2920	3788	5350
CSbapl.2435	BAPLcs_chr1;BAPLcs_chr1	42252260;42254692	42253977;42254803	-;-	1830	38	26	27	124	84	84
CSbapl.2436	BAPLcs_chr1;BAPLcs_chr1;BAPLcs_chr1;BAPLcs_chr1;BAPLcs_chr1;BAPLcs_chr1;BAPLcs_chr1;BAPLcs_chr1;BAPLcs_chr1;BAPLcs_chr1;BAPLcs_chr1;BAPLcs_chr1;BAPLcs_chr1;BAPLcs_chr1;BAPLcs_chr1;BAPLcs_chr1;BAPLcs_chr1	42257429;42257429;42257429;42257429;42259467;42259467;42259467;42259521;42262724;42262724;42262724;42262724;42265943;42265943;42265943;42265943;42270987	42257512;42257512;42257512;42257512;42259648;42259648;42259648;42259648;42262862;42262862;42262862;42262862;42266035;42266035;42266035;42266035;42272345	+;+;+;+;+;+;+;+;+;+;+;+;+;+;+;+;+	1857	81	97	73	127	274	222
CSbapl.2448	BAPLcs_chr1;BAPLcs_chr1	42336178;42336178	42337539;42337539	+;+	1362	0	7	0	0	2	0
CSbapl.2451	BAPLcs_chr1	42353818	42354519	-	702	0	1	0	0	0	0
CSbapl.2477	BAPLcs_chr1;BAPLcs_chr1	42491898;42495715	42492078;42496643	+;+	1110	9	12	0	0	0	0
CSbapl.2481	BAPLcs_chr1;BAPLcs_chr1;BAPLcs_chr1	42520690;42523611;42524577	42522185;42523670;42524595	-;-;-	1575	0	2	0	17	0	0
CSbapl.2486	BAPLcs_chr1;BAPLcs_chr1;BAPLcs_chr1;BAPLcs_chr1	42549306;42550835;42552078;42552764	42549424;42550905;42552229;42553678	+;+;+;+	1257	3	6	6	8	0	2
CSbapl.2489	BAPLcs_chr1;BAPLcs_chr1;BAPLcs_chr1	42613502;42613502;42613502	42614551;42614551;42614551	+;+;+	1050	215	157	74	145	235	191
CSbapl.2490	BAPLcs_chr1;BAPLcs_chr1;BAPLcs_chr1;BAPLcs_chr1;BAPLcs_chr1;BAPLcs_chr1;BAPLcs_chr1;BAPLcs_chr1;BAPLcs_chr1;BAPLcs_chr1;BAPLcs_chr1;BAPLcs_chr1	42646527;42647389;42649731;42650410;42651089;42651678;42652863;42654424;42655061;42655745;42656595;42660438	42646679;42647530;42649857;42650517;42651238;42651803;42653063;42654559;42655180;42655852;42656752;42660444	-;-;-;-;-;-;-;-;-;-;-;-	1536	181	212	41	231	524	658
CSbapl.2491	BAPLcs_chr1	42666635	42667393	+	759	5	6	3	0	2	10
CSbapl.2492	BAPLcs_chr1;BAPLcs_chr1;BAPLcs_chr1;BAPLcs_chr1;BAPLcs_chr1;BAPLcs_chr1;BAPLcs_chr1;BAPLcs_chr1;BAPLcs_chr1;BAPLcs_chr1;BAPLcs_chr1;BAPLcs_chr1;BAPLcs_chr1;BAPLcs_chr1;BAPLcs_chr1;BAPLcs_chr1	42669631;42669631;42672316;42672316;42673239;42673239;42674095;42674095;42678825;42678825;42682498;42682498;42684530;42684530;42690393;42690393	42670470;42670470;42672429;42672429;42673307;42673307;42674177;42674177;42678917;42678917;42682892;42682892;42684708;42684708;42690569;42690569	+;+;+;+;+;+;+;+;+;+;+;+;+;+;+;+	1950	1651	1662	1369	494	859	974
CSbapl.2493	BAPLcs_chr1;BAPLcs_chr1;BAPLcs_chr1;BAPLcs_chr1;BAPLcs_chr1;BAPLcs_chr1;BAPLcs_chr1;BAPLcs_chr1;BAPLcs_chr1;BAPLcs_chr1;BAPLcs_chr1;BAPLcs_chr1;BAPLcs_chr1;BAPLcs_chr1;BAPLcs_chr1;BAPLcs_chr1;BAPLcs_chr1;BAPLcs_chr1;BAPLcs_chr1;BAPLcs_chr1;BAPLcs_chr1	42698163;42699041;42700177;42701661;42704479;42705583;42705816;42706139;42708317;42708983;42727118;42728258;42729693;42730451;42730825;42734749;42736726;42739709;42740967;42741504;42744762	42698225;42699350;42700283;42701846;42704618;42705628;42706138;42706259;42708388;42709157;42727323;42728400;42729808;42730584;42730967;42734842;42736794;42739899;42741264;42741624;42744919	+;+;+;+;+;+;+;+;+;+;+;+;+;+;+;+;+;+;+;+;+	3216	183	240	185	545	562	575
CSbapl.2494	BAPLcs_chr1;BAPLcs_chr1;BAPLcs_chr1;BAPLcs_chr1;BAPLcs_chr1;BAPLcs_chr1	42773308;42773308;42773939;42773939;42776096;42776096	42773700;42773700;42774062;42774062;42776478;42776478	+;+;+;+;+;+	900	112	131	75	93	57	64
CSbapl.2495	BAPLcs_chr1;BAPLcs_chr1;BAPLcs_chr1;BAPLcs_chr1;BAPLcs_chr1;BAPLcs_chr1;BAPLcs_chr1;BAPLcs_chr1;BAPLcs_chr1;BAPLcs_chr1;BAPLcs_chr1;BAPLcs_chr1;BAPLcs_chr1;BAPLcs_chr1;BAPLcs_chr1	42788696;42788696;42788696;42788696;42788696;42790399;42790399;42790399;42790399;42790879;42790879;42790879;42792848;42792848;42792848	42789070;42789070;42789070;42789136;42789070;42790438;42790438;42790438;42790438;42790997;42790959;42790959;42793260;42793260;42793260	+;+;+;+;+;+;+;+;+;+;+;+;+;+;+	1013	83	81	49	65	48	70
CSbapl.2497	BAPLcs_chr1;BAPLcs_chr1;BAPLcs_chr1;BAPLcs_chr1;BAPLcs_chr1;BAPLcs_chr1;BAPLcs_chr1;BAPLcs_chr1;BAPLcs_chr1;BAPLcs_chr1;BAPLcs_chr1;BAPLcs_chr1;BAPLcs_chr1;BAPLcs_chr1;BAPLcs_chr1;BAPLcs_chr1;BAPLcs_chr1;BAPLcs_chr1;BAPLcs_chr1	42801426;42801426;42801426;42801426;42802306;42802306;42802306;42802306;42804048;42804048;42804048;42804048;42805451;42805451;42805451;42812133;42812133;42812133;42812174	42801743;42801743;42801743;42801743;42802336;42802336;42802336;42802336;42804143;42804143;42804143;42804143;42805808;42805681;42805842;42812524;42812136;42812524;42812524	+;+;+;+;+;+;+;+;+;+;+;+;+;+;+;+;+;+;+	1229	138	981	118	91	128	140
CSbapl.2501	BAPLcs_chr1;BAPLcs_chr1;BAPLcs_chr1;BAPLcs_chr1;BAPLcs_chr1;BAPLcs_chr1;BAPLcs_chr1;BAPLcs_chr1;BAPLcs_chr1;BAPLcs_chr1;BAPLcs_chr1;BAPLcs_chr1;BAPLcs_chr1;BAPLcs_chr1;BAPLcs_chr1	42827771;42827771;42827771;42827771;42827771;42828059;42831305;42831305;42831305;42831305;42831305;42832627;42832627;42832627;42832627	42828128;42828124;42828187;42828124;42828124;42828124;42831440;42831333;42831440;42831440;42831440;42832763;42832763;42832763;42832763	+;+;+;+;+;+;+;+;+;+;+;+;+;+;+	690	14	136	18	9	10	26
CSbapl.2515	BAPLcs_chr1	42926417	42926884	+	468	0	2	2	2	0	0
CSbapl.2522	BAPLcs_chr1	42959118	42960401	-	1284	0	0	1	1	1	0
CSbapl.2523	BAPLcs_chr1	42961051	42961674	-	624	0	6	0	5	0	0
CSbapl.2525	BAPLcs_chr1	42971652	42972044	-	393	2	2	1	3	0	0
CSbapl.2530	BAPLcs_chr1;BAPLcs_chr1;BAPLcs_chr1	42984279;42985232;42985698	42984338;42985351;42985841	+;+;+	324	3	3	3	3	0	1
CSbapl.2536	BAPLcs_chr1	43022064	43023230	+	1167	9	12	16	16	25	4
CSbapl.2548	BAPLcs_chr1	43100544	43101782	-	1239	2	0	0	4	0	1
CSbapl.2554	BAPLcs_chr1	43150888	43151208	-	321	0	0	6	3	0	0
CSbapl.2556	BAPLcs_chr1	43245717	43246190	-	474	0	0	0	1	0	0
CSbapl.2559	BAPLcs_chr1;BAPLcs_chr1;BAPLcs_chr1;BAPLcs_chr1;BAPLcs_chr1;BAPLcs_chr1;BAPLcs_chr1;BAPLcs_chr1;BAPLcs_chr1;BAPLcs_chr1;BAPLcs_chr1;BAPLcs_chr1;BAPLcs_chr1;BAPLcs_chr1;BAPLcs_chr1;BAPLcs_chr1;BAPLcs_chr1;BAPLcs_chr1;BAPLcs_chr1;BAPLcs_chr1;BAPLcs_chr1;BAPLcs_chr1;BAPLcs_chr1;BAPLcs_chr1;BAPLcs_chr1;BAPLcs_chr1;BAPLcs_chr1;BAPLcs_chr1;BAPLcs_chr1;BAPLcs_chr1;BAPLcs_chr1;BAPLcs_chr1;BAPLcs_chr1;BAP…	43272689;43272689;43272689;43272689;43276855;43276855;43276855;43276855;43282490;43282490;43282547;43283160;43283160;43283160;43283160;43286067;43286125;43286125;43286751;43286751;43286751;43286751;43286751;43287524;43287524;43287524;43287524;43287524;43289927;43289927;43289927;43289927;43289927;43290672;43290672;43290672;43290672;43290672;43293251;43293251;43293251;43293251;43293251;43295802;432…	43272841;43272841;43272841;43272841;43276988;43276988;43276988;43276988;43282582;43282582;43282582;43283314;43283314;43283314;43283314;43286184;43286184;43286184;43286952;43286952;43286952;43286952;43286952;43287689;43287689;43287689;43287689;43287689;43290034;43290034;43290034;43290034;43290034;43290803;43290803;43290803;43290803;43290803;43293358;43293358;43293358;43293358;43293358;43295903;432…	-;-;-;-;-;-;-;-;-;-;-;-;-;-;-;-;-;-;-;-;-;-;-;-;-;-;-;-;-;-;-;-;-;-;-;-;-;-;-;-;-;-;-;-;-;-;-;-;-;-;-;-;-;-;-;-;-;-;-;-;-;-;-;-;-;-;-;-;-;-;-;-;-;-;-;-;-;-;-;-;-;-;-;-;-;-;-;-	3628	122	210	52	684	1139	1357
CSbapl.2561	BAPLcs_chr1	43323143	43323766	-	624	0	4	0	3	1	0
CSbapl.2562	BAPLcs_chr1;BAPLcs_chr1;BAPLcs_chr1;BAPLcs_chr1;BAPLcs_chr1;BAPLcs_chr1;BAPLcs_chr1;BAPLcs_chr1;BAPLcs_chr1;BAPLcs_chr1;BAPLcs_chr1;BAPLcs_chr1;BAPLcs_chr1;BAPLcs_chr1;BAPLcs_chr1;BAPLcs_chr1;BAPLcs_chr1;BAPLcs_chr1;BAPLcs_chr1;BAPLcs_chr1;BAPLcs_chr1;BAPLcs_chr1;BAPLcs_chr1;BAPLcs_chr1;BAPLcs_chr1;BAPLcs_chr1;BAPLcs_chr1;BAPLcs_chr1;BAPLcs_chr1;BAPLcs_chr1;BAPLcs_chr1;BAPLcs_chr1	43332607;43332607;43334878;43334878;43335831;43335831;43336755;43336755;43337432;43337432;43338079;43338079;43339121;43339121;43339988;43339988;43341156;43341156;43344099;43344099;43345223;43345223;43345908;43345908;43346584;43346584;43347682;43347682;43348558;43348558;43349803;43349803	43332945;43332945;43334946;43334946;43335882;43335882;43336822;43336822;43337512;43337512;43338152;43338152;43339258;43339258;43340123;43340123;43341244;43341244;43344211;43344211;43345293;43345293;43345994;43345994;43346819;43346819;43347782;43347782;43348682;43348682;43350048;43350048	+;+;+;+;+;+;+;+;+;+;+;+;+;+;+;+;+;+;+;+;+;+;+;+;+;+;+;+;+;+;+;+	2025	1	367	28	22	9	24
CSbapl.2570	BAPLcs_chr1	43386233	43387276	+	1044	0	0	0	1	0	0
CSbapl.2576	BAPLcs_chr1	43449678	43450034	+	357	0	0	1	0	0	0
CSbapl.2578	BAPLcs_chr1	43460631	43462454	+	1824	6	0	4	34	12	18
CSbapl.2587	BAPLcs_chr1	43493290	43493895	-	606	0	0	1	0	1	0
CSbapl.2589	BAPLcs_chr1;BAPLcs_chr1;BAPLcs_chr1	43505989;43505989;43505989	43506654;43506654;43506654	-;-;-	666	266	295	66	102	116	81
CSbapl.2601	BAPLcs_chr1	43580233	43580541	-	309	0	1	0	0	0	0
CSbapl.2603	BAPLcs_chr1	43589734	43590090	+	357	0	0	0	0	0	1
CSbapl.2607	BAPLcs_chr1	43613051	43613380	+	330	0	0	0	0	0	2
CSbapl.2612	BAPLcs_chr1;BAPLcs_chr1;BAPLcs_chr1;BAPLcs_chr1;BAPLcs_chr1;BAPLcs_chr1;BAPLcs_chr1;BAPLcs_chr1;BAPLcs_chr1;BAPLcs_chr1;BAPLcs_chr1;BAPLcs_chr1;BAPLcs_chr1;BAPLcs_chr1;BAPLcs_chr1;BAPLcs_chr1;BAPLcs_chr1;BAPLcs_chr1;BAPLcs_chr1;BAPLcs_chr1;BAPLcs_chr1;BAPLcs_chr1;BAPLcs_chr1;BAPLcs_chr1;BAPLcs_chr1;BAPLcs_chr1;BAPLcs_chr1;BAPLcs_chr1;BAPLcs_chr1;BAPLcs_chr1;BAPLcs_chr1;BAPLcs_chr1;BAPLcs_chr1;BAP…	43702966;43702966;43702966;43702966;43702966;43702966;43708353;43708353;43708353;43708353;43708353;43709646;43709646;43709646;43709646;43709646;43711816;43711816;43711816;43711816;43745698;43745698;43748078;43748078;43748078;43749301;43749301;43749369;43749369;43749369;43751545;43751545;43751545;43751545;43751545;43751545;43788434;43795974;43797919;43799051;43803948;43806274;43810570;43812319;438…	43703369;43703369;43703369;43703369;43703369;43703369;43708454;43708454;43708454;43708454;43708454;43709679;43709679;43709679;43709679;43709679;43712208;43712208;43712208;43712208;43746101;43746101;43748179;43748179;43748179;43749402;43749402;43749402;43749402;43749402;43751937;43751937;43751937;43751937;43751937;43751937;43788596;43796075;43797974;43799086;43804029;43806326;43810622;43812429;438…	-;-;-;-;-;-;-;-;-;-;-;-;-;-;-;-;-;-;-;-;-;-;-;-;-;-;-;-;-;-;-;-;-;-;-;-;-;-;-;-;-;-;-;-;-;-;-;-;-;-;-;-;-;-;-;-	6869	100	205	85	770	492	379
CSbapl.2615	BAPLcs_chr1;BAPLcs_chr1;BAPLcs_chr1;BAPLcs_chr1	43893994;43897068;43897914;43904279	43894469;43897212;43898071;43904393	-;-;-;-	894	13	8	0	3	3	13
CSbapl.2617	BAPLcs_chr1;BAPLcs_chr1	43918835;43996439	43919232;43996688	-;-	648	1	1	6	13	8	18
CSbapl.2621	BAPLcs_chr1	43979711	43980073	+	363	9	3	0	4	0	6
CSbapl.2622	BAPLcs_chr1;BAPLcs_chr1;BAPLcs_chr1;BAPLcs_chr1;BAPLcs_chr1;BAPLcs_chr1;BAPLcs_chr1;BAPLcs_chr1;BAPLcs_chr1;BAPLcs_chr1	43980929;43981006;43983946;43983946;43985437;43985437;43987915;43987915;43988802;43988802	43980944;43981156;43984096;43984096;43985546;43985546;43988018;43988018;43988912;43988912	+;+;+;+;+;+;+;+;+;+	643	214	657	173	128	98	248
CSbapl.2624	BAPLcs_chr1	43999183	43999929	+	747	0	0	0	1	2	1
CSbapl.2628	BAPLcs_chr1;BAPLcs_chr1;BAPLcs_chr1;BAPLcs_chr1;BAPLcs_chr1;BAPLcs_chr1;BAPLcs_chr1;BAPLcs_chr1;BAPLcs_chr1;BAPLcs_chr1;BAPLcs_chr1;BAPLcs_chr1;BAPLcs_chr1;BAPLcs_chr1;BAPLcs_chr1;BAPLcs_chr1;BAPLcs_chr1;BAPLcs_chr1;BAPLcs_chr1;BAPLcs_chr1;BAPLcs_chr1;BAPLcs_chr1;BAPLcs_chr1;BAPLcs_chr1;BAPLcs_chr1;BAPLcs_chr1;BAPLcs_chr1;BAPLcs_chr1	44014712;44017820;44017892;44018258;44018258;44019133;44019133;44019566;44019566;44020369;44020369;44020897;44020897;44021554;44021554;44022437;44022437;44023595;44023595;44024290;44024290;44025626;44025626;44026717;44026717;44028176;44028176;44032585	44014732;44017931;44017931;44018366;44018366;44019215;44019215;44019686;44019686;44020438;44020438;44021100;44021100;44021701;44021701;44022544;44022544;44023741;44023741;44024448;44024448;44025886;44025886;44026884;44026884;44028333;44028310;44032703	+;+;+;+;+;+;+;+;+;+;+;+;+;+;+;+;+;+;+;+;+;+;+;+;+;+;+;+	1988	7724	9112	3440	1686	4368	4841
CSbapl.2631	BAPLcs_chr1;BAPLcs_chr1;BAPLcs_chr1	44054590;44067933;44068849	44054778;44068049;44068923	+;+;+	381	138	435	41	11	40	57
CSbapl.2636	BAPLcs_chr1	44113860	44116811	+	2952	0	16	5	0	2	2
CSbapl.2642	BAPLcs_chr1;BAPLcs_chr1;BAPLcs_chr1;BAPLcs_chr1	44159638;44162672;44163210;44165455	44159709;44162746;44163299;44165523	+;+;+;+	306	0	5	0	0	0	0
CSbapl.2646	BAPLcs_chr1;BAPLcs_chr1;BAPLcs_chr1;BAPLcs_chr1	44186892;44190687;44191240;44193237	44186960;44190776;44191308;44193407	-;-;-;-	399	82	144	11	7	41	38
CSbapl.2648	BAPLcs_chr1	44235615	44237516	-	1902	23	6	2	56	17	10
CSbapl.2651	BAPLcs_chr1;BAPLcs_chr1;BAPLcs_chr1;BAPLcs_chr1	44266969;44270167;44272707;44273907	44267078;44270341;44272899;44273917	-;-;-;-	489	2	0	0	9	5	10
CSbapl.2653	BAPLcs_chr1	44284100	44286004	-	1905	36	6	0	127	22	57
CSbapl.2656	BAPLcs_chr1;BAPLcs_chr1	44292878;44338517	44293230;44339369	+;+	1206	0	0	0	15	0	3
CSbapl.2657	BAPLcs_chr1	44294483	44295121	+	639	0	0	0	4	0	1
CSbapl.2661	BAPLcs_chr1	44320404	44321069	-	666	0	0	0	4	2	0
CSbapl.2663	BAPLcs_chr1;BAPLcs_chr1;BAPLcs_chr1;BAPLcs_chr1;BAPLcs_chr1;BAPLcs_chr1;BAPLcs_chr1;BAPLcs_chr1;BAPLcs_chr1;BAPLcs_chr1;BAPLcs_chr1;BAPLcs_chr1;BAPLcs_chr1;BAPLcs_chr1;BAPLcs_chr1;BAPLcs_chr1;BAPLcs_chr1	44349463;44352702;44356763;44359796;44362056;44363254;44366567;44369508;44374418;44375063;44376415;44380103;44383737;44385628;44386685;44387786;44441605	44349955;44352849;44356861;44359970;44362248;44363394;44366738;44369657;44374565;44375134;44376519;44380180;44383853;44385742;44386769;44388367;44442040	-;-;-;-;-;-;-;-;-;-;-;-;-;-;-;-;-	3309	11	14	2	116	62	151
CSbapl.2665	BAPLcs_chr1	44414738	44415280	-	543	0	0	2	0	0	0
CSbapl.2668	BAPLcs_chr1	44465850	44466545	-	696	0	0	0	2	0	1
CSbapl.2675	BAPLcs_chr1;BAPLcs_chr1;BAPLcs_chr1;BAPLcs_chr1;BAPLcs_chr1;BAPLcs_chr1;BAPLcs_chr1;BAPLcs_chr1;BAPLcs_chr1;BAPLcs_chr1;BAPLcs_chr1;BAPLcs_chr1;BAPLcs_chr1;BAPLcs_chr1;BAPLcs_chr1;BAPLcs_chr1;BAPLcs_chr1;BAPLcs_chr1;BAPLcs_chr1;BAPLcs_chr1;BAPLcs_chr1;BAPLcs_chr1;BAPLcs_chr1;BAPLcs_chr1;BAPLcs_chr1;BAPLcs_chr1;BAPLcs_chr1;BAPLcs_chr1;BAPLcs_chr1;BAPLcs_chr1;BAPLcs_chr1;BAPLcs_chr1;BAPLcs_chr1;BAP…	44534665;44534665;44535691;44575815;44576856;44576856;44582880;44584062;44586156;44601052;44601052;44601052;44601052;44601052;44601789;44601789;44601789;44601789;44601789;44604428;44604428;44604428;44604428;44604428;44607588;44607603;44607603;44607607;44607607;44607607;44611012;44611012;44611012;44611012;44611012;44611012;44622977;44625770;44625770;44625770;44625770;44625770;44625770;44625770;446…	44535104;44535104;44535754;44576272;44576919;44576919;44583560;44584519;44586219;44601177;44601177;44601177;44601177;44601177;44601866;44601866;44601866;44601866;44601866;44604485;44604481;44604481;44604485;44604485;44607702;44607702;44607702;44607702;44607702;44607702;44611131;44611131;44611131;44611131;44611131;44611131;44622998;44626033;44626033;44626033;44625999;44626033;44626033;44626033;446…	-;-;-;-;-;-;-;-;-;-;-;-;-;-;-;-;-;-;-;-;-;-;-;-;-;-;-;-;-;-;-;-;-;-;-;-;-;-;-;-;-;-;-;-;-;-;-;-;-;-;-;-;-;-;-;-	3281	3091	1816	235	328	465	667
CSbapl.2676	BAPLcs_chr1;BAPLcs_chr1;BAPLcs_chr1;BAPLcs_chr1	44560241;44561350;44562215;44564224	44560750;44561451;44562380;44564453	+;+;+;+	1008	4	5	4	8	7	7
CSbapl.2677	BAPLcs_chr1;BAPLcs_chr1	44564383;44565898	44564554;44566121	-;-	396	3	0	0	2	0	0
CSbapl.2678	BAPLcs_chr1;BAPLcs_chr1	44570689;44573313	44571207;44573426	-;-	633	0	0	0	0	2	0
CSbapl.2682	BAPLcs_chr1;BAPLcs_chr1;BAPLcs_chr1;BAPLcs_chr1;BAPLcs_chr1;BAPLcs_chr1;BAPLcs_chr1;BAPLcs_chr1;BAPLcs_chr1;BAPLcs_chr1;BAPLcs_chr1;BAPLcs_chr1;BAPLcs_chr1;BAPLcs_chr1;BAPLcs_chr1;BAPLcs_chr1;BAPLcs_chr1;BAPLcs_chr1;BAPLcs_chr1;BAPLcs_chr1;BAPLcs_chr1;BAPLcs_chr1;BAPLcs_chr1;BAPLcs_chr1;BAPLcs_chr1;BAPLcs_chr1;BAPLcs_chr1;BAPLcs_chr1;BAPLcs_chr1;BAPLcs_chr1;BAPLcs_chr1;BAPLcs_chr1;BAPLcs_chr1;BAP…	44663101;44663101;44665747;44665747;44680705;44680705;44681577;44681577;44694795;44694795;44695731;44695731;44698213;44698213;44698867;44698867;44699537;44699537;44701843;44701843;44702443;44702443;44703202;44703202;44705512;44705512;44706315;44706315;44712126;44712126;44714749;44714749;44716567;44716567;44717647;44717647;44723102;44723102;44723544;44723544;44724166;44724166;44724745;44724745;447…	44663181;44663181;44665827;44665827;44680897;44680897;44681679;44681679;44694996;44694996;44695853;44695853;44698333;44698333;44698954;44698954;44699643;44699643;44701967;44701967;44702532;44702532;44703375;44703375;44705730;44705730;44706398;44706398;44712258;44712258;44714810;44714810;44716723;44716723;44717819;44717819;44723213;44723213;44723599;44723599;44724288;44724288;44724819;44724819;447…	+;+;+;+;+;+;+;+;+;+;+;+;+;+;+;+;+;+;+;+;+;+;+;+;+;+;+;+;+;+;+;+;+;+;+;+;+;+;+;+;+;+;+;+;+;+;+;+;+;+;+;+;+;+;+;+;+;+;+;+;+;+;+;+;+;+;+;+;+;+;+;+;+;+;+;+;+;+;+;+;+;+;+;+;+;+;+;+;+;+;+;+;+;+;+;+;+;+;+;+;+;+;+;+;+;+;+;+;+;+;+;+;+;+;+;+;+;+;+;+;+;+;+;+;+;+;+;+;+;+;+;+;+;+;+;+;+;+;+;+;+;+;+;+;+;+;+;+;+;+;+;+;+;+;+;+;+;+;+;+;+;+	11491	717	3528	490	993	1255	1292
CSbapl.2687	BAPLcs_chr1;BAPLcs_chr1;BAPLcs_chr1;BAPLcs_chr1;BAPLcs_chr1;BAPLcs_chr1;BAPLcs_chr1;BAPLcs_chr1;BAPLcs_chr1;BAPLcs_chr1;BAPLcs_chr1;BAPLcs_chr1;BAPLcs_chr1	44860559;44862111;44863626;44864869;44868836;44869664;44870410;44871747;44872997;44874047;44874606;44876196;44877908	44861474;44862259;44863739;44865024;44868923;44869781;44870476;44871950;44873123;44874181;44874727;44876314;44878034	+;+;+;+;+;+;+;+;+;+;+;+;+	2442	0	5	0	0	2	5
CSbapl.2691	BAPLcs_chr1;BAPLcs_chr1;BAPLcs_chr1;BAPLcs_chr1;BAPLcs_chr1;BAPLcs_chr1	44893516;44895051;44902377;44907766;44912935;44916262	44893740;44895143;44902535;44908690;44913026;44916429	+;+;+;+;+;+	1662	9	0	6	0	6	2
CSbapl.2693	BAPLcs_chr1;BAPLcs_chr1;BAPLcs_chr1;BAPLcs_chr1;BAPLcs_chr1;BAPLcs_chr1;BAPLcs_chr1;BAPLcs_chr1;BAPLcs_chr1;BAPLcs_chr1;BAPLcs_chr1;BAPLcs_chr1;BAPLcs_chr1;BAPLcs_chr1;BAPLcs_chr1;BAPLcs_chr1;BAPLcs_chr1;BAPLcs_chr1;BAPLcs_chr1;BAPLcs_chr1;BAPLcs_chr1;BAPLcs_chr1;BAPLcs_chr1;BAPLcs_chr1;BAPLcs_chr1;BAPLcs_chr1;BAPLcs_chr1;BAPLcs_chr1;BAPLcs_chr1;BAPLcs_chr1;BAPLcs_chr1;BAPLcs_chr1;BAPLcs_chr1;BAP…	44929338;44929338;44931186;44931186;44932227;44932227;44932845;44932845;44933394;44933394;44934769;44934769;44935937;44935937;44936485;44936485;44939318;44939324;44939324;44939848;44939848;44939848;44940547;44940547;44940547;44941510;44941510;44941510;44942424;44942424;44942424;44943878;44943878;44943878;44945900;44945900;44945900;44946310;44946310;44946310;44948485;44948485;44948485;44949790;449…	44929407;44929407;44931258;44931258;44932320;44932320;44932919;44932919;44933472;44933472;44935069;44935069;44936001;44936001;44936558;44936558;44939395;44939395;44939395;44939998;44939998;44939998;44940595;44940595;44940595;44941590;44941590;44941590;44942471;44942471;44942471;44943934;44943934;44943934;44945942;44945942;44945942;44946483;44946483;44946483;44948603;44948603;44948603;44950278;449…	-;-;-;-;-;-;-;-;-;-;-;-;-;-;-;-;-;-;-;-;-;-;-;-;-;-;-;-;-;-;-;-;-;-;-;-;-;-;-;-;-;-;-;-;-;-;-;-;-;-;-;-;-;-;-;-;-;-;-;-;-	2805	208	279	164	315	348	289
CSbapl.2698	BAPLcs_chr1	45019243	45021954	-	2712	0	3	0	3	0	0
CSbapl.2702	BAPLcs_chr1;BAPLcs_chr1	45085777;45088785	45086443;45088837	-;-	720	11	88	5	0	3	0
CSbapl.2710	BAPLcs_chr1;BAPLcs_chr1;BAPLcs_chr1;BAPLcs_chr1;BAPLcs_chr1;BAPLcs_chr1;BAPLcs_chr1;BAPLcs_chr1;BAPLcs_chr1;BAPLcs_chr1;BAPLcs_chr1;BAPLcs_chr1;BAPLcs_chr1;BAPLcs_chr1;BAPLcs_chr1	45257782;45258417;45258417;45259758;45259758;45259758;45262343;45262343;45262343;45265031;45265031;45265031;45266032;45266032;45266032	45257796;45258494;45258494;45259918;45259918;45259918;45262460;45262460;45262460;45265145;45265145;45265145;45266165;45266147;45266147	-;-;-;-;-;-;-;-;-;-;-;-;-;-;-	621	62	110	59	239	200	150
CSbapl.2711	BAPLcs_chr1	45254133	45254687	+	555	114	164	114	297	177	174
CSbapl.2712	BAPLcs_chr1	45281949	45282653	-	705	0	3	0	2	0	0
CSbapl.2713	BAPLcs_chr1	45301966	45302715	-	750	2	3	0	30	6	8
CSbapl.2714	BAPLcs_chr1	45303467	45304045	-	579	8	2	1	16	48	5
CSbapl.2715	BAPLcs_chr1;BAPLcs_chr1;BAPLcs_chr1;BAPLcs_chr1;BAPLcs_chr1;BAPLcs_chr1;BAPLcs_chr1;BAPLcs_chr1;BAPLcs_chr1;BAPLcs_chr1	45317268;45317703;45324012;45324625;45325876;45326423;45327837;45331563;45332701;45334331	45317337;45318967;45324111;45324675;45326067;45326593;45328007;45331759;45332878;45334407	+;+;+;+;+;+;+;+;+;+	2472	5	38	21	3885	5338	8046
CSbapl.2725	BAPLcs_chr1;BAPLcs_chr1	45397855;45399909	45398709;45401732	+;+	2679	0	2	1	156	64	84
CSbapl.2729	BAPLcs_chr1;BAPLcs_chr1;BAPLcs_chr1;BAPLcs_chr1;BAPLcs_chr1;BAPLcs_chr1;BAPLcs_chr1;BAPLcs_chr1;BAPLcs_chr1	45411838;45412272;45419651;45420268;45421532;45422071;45423784;45424922;45426539	45411907;45413536;45419750;45420318;45421714;45422241;45423980;45425099;45426615	+;+;+;+;+;+;+;+;+	2292	3	181	58	15057	22758	30097
CSbapl.2732	BAPLcs_chr1;BAPLcs_chr1;BAPLcs_chr1;BAPLcs_chr1;BAPLcs_chr1;BAPLcs_chr1;BAPLcs_chr1;BAPLcs_chr1;BAPLcs_chr1;BAPLcs_chr1;BAPLcs_chr1;BAPLcs_chr1;BAPLcs_chr1;BAPLcs_chr1;BAPLcs_chr1;BAPLcs_chr1;BAPLcs_chr1;BAPLcs_chr1;BAPLcs_chr1;BAPLcs_chr1;BAPLcs_chr1;BAPLcs_chr1;BAPLcs_chr1;BAPLcs_chr1;BAPLcs_chr1;BAPLcs_chr1;BAPLcs_chr1;BAPLcs_chr1;BAPLcs_chr1;BAPLcs_chr1;BAPLcs_chr1;BAPLcs_chr1;BAPLcs_chr1;BAP…	45434804;45435476;45448511;45449314;45464591;45464591;45467461;45472699;45472699;45472699;45478298;45478298;45478298;45478755;45478755;45478755;45481682;45481682;45481682;45482770;45482770;45482770;45485228;45485228;45485228;45486126;45486126;45486126;45488147;45488147;45488147;45495734;45495734;45495734;45496264;45496264;45496264;45496711;45496711;45498288;45498288;45498874;45498874;45499872;454…	45434913;45435563;45448630;45449418;45464644;45464644;45467466;45472864;45472840;45472864;45478406;45478406;45478406;45479624;45479624;45479624;45481901;45481901;45481901;45484754;45484754;45484754;45485612;45485612;45485612;45486262;45486262;45486262;45489771;45489771;45489771;45495882;45495882;45495882;45496367;45496367;45496407;45496911;45496911;45498387;45498387;45498957;45498957;45500012;455…	-;-;-;-;-;-;-;-;-;-;-;-;-;-;-;-;-;-;-;-;-;-;-;-;-;-;-;-;-;-;-;-;-;-;-;-;-;-;-;-;-;-;-;-;-;-;-;-;-;-;-;-;-;-;-;-;-;-;-;-;-;-;-;-;-;-;-	8137	305	466	254	772	824	789
CSbapl.2733	BAPLcs_chr1;BAPLcs_chr1;BAPLcs_chr1;BAPLcs_chr1;BAPLcs_chr1;BAPLcs_chr1	45453208;45454020;45454975;45454986;45457358;45457358	45453760;45454166;45455918;45455918;45457636;45457636	+;+;+;+;+;+	1923	175	143	171	828	825	954
CSbapl.2736	BAPLcs_chr1;BAPLcs_chr1;BAPLcs_chr1;BAPLcs_chr1;BAPLcs_chr1;BAPLcs_chr1;BAPLcs_chr1;BAPLcs_chr1;BAPLcs_chr1;BAPLcs_chr1;BAPLcs_chr1;BAPLcs_chr1;BAPLcs_chr1;BAPLcs_chr1;BAPLcs_chr1;BAPLcs_chr1;BAPLcs_chr1;BAPLcs_chr1;BAPLcs_chr1;BAPLcs_chr1;BAPLcs_chr1;BAPLcs_chr1;BAPLcs_chr1;BAPLcs_chr1;BAPLcs_chr1;BAPLcs_chr1;BAPLcs_chr1;BAPLcs_chr1;BAPLcs_chr1;BAPLcs_chr1;BAPLcs_chr1	45545796;45547197;45548214;45552190;45560251;45560314;45560314;45561480;45561480;45561480;45562926;45562926;45562926;45563421;45563421;45563421;45566460;45566460;45566460;45569101;45569101;45570822;45574087;45574777;45575659;45622630;45623212;45628519;45629756;45633285;45635422	45545933;45547292;45548357;45552303;45560370;45560370;45560370;45561625;45561625;45561625;45563012;45563012;45563012;45563532;45563532;45563532;45566720;45566720;45566720;45569256;45569256;45570964;45574250;45575114;45575802;45622698;45623301;45629124;45629824;45633374;45635532	+;+;+;+;+;+;+;+;+;+;+;+;+;+;+;+;+;+;+;+;+;+;+;+;+;+;+;+;+;+;+	3198	88	166	98	349	426	641
CSbapl.2738	BAPLcs_chr1;BAPLcs_chr1;BAPLcs_chr1;BAPLcs_chr1;BAPLcs_chr1;BAPLcs_chr1;BAPLcs_chr1;BAPLcs_chr1;BAPLcs_chr1;BAPLcs_chr1;BAPLcs_chr1;BAPLcs_chr1;BAPLcs_chr1;BAPLcs_chr1;BAPLcs_chr1;BAPLcs_chr1;BAPLcs_chr1;BAPLcs_chr1;BAPLcs_chr1;BAPLcs_chr1;BAPLcs_chr1;BAPLcs_chr1;BAPLcs_chr1;BAPLcs_chr1;BAPLcs_chr1;BAPLcs_chr1;BAPLcs_chr1;BAPLcs_chr1;BAPLcs_chr1;BAPLcs_chr1;BAPLcs_chr1;BAPLcs_chr1;BAPLcs_chr1;BAP…	45584713;45584713;45584713;45584713;45587618;45587618;45587618;45587618;45588604;45588604;45588604;45588604;45589391;45589391;45589391;45589391;45590102;45590102;45590102;45590102;45593099;45593099;45593099;45593099;45594562;45594562;45596964;45596964;45599406;45599406;45599406;45599406;45599829;45599829;45599829;45599829;45601739;45601739;45601739;45601739;45602442;45602442;45602442;45602442;456…	45584899;45584899;45584899;45584899;45587697;45587697;45587697;45587697;45588832;45588832;45588832;45588832;45589543;45589543;45589543;45589543;45590187;45590187;45590187;45590187;45593256;45593256;45593256;45593256;45594663;45594663;45597026;45597026;45599479;45599479;45599479;45599479;45600193;45600193;45600193;45600193;45601819;45601819;45601819;45601819;45602542;45602542;45602542;45602542;456…	-;-;-;-;-;-;-;-;-;-;-;-;-;-;-;-;-;-;-;-;-;-;-;-;-;-;-;-;-;-;-;-;-;-;-;-;-;-;-;-;-;-;-;-;-;-;-;-;-;-;-;-;-;-;-;-;-;-;-;-;-;-;-;-;-;-;-;-;-;-;-	4764	214	288	89	1761	1864	2863
CSbapl.2739	BAPLcs_chr1;BAPLcs_chr1;BAPLcs_chr1;BAPLcs_chr1;BAPLcs_chr1;BAPLcs_chr1;BAPLcs_chr1	45756773;45757675;45757700;45758716;45758716;45759241;45759241	45757014;45757877;45757877;45758772;45758772;45759491;45759491	+;+;+;+;+;+;+	753	11	27	0	1	3	4
CSbapl.2742	BAPLcs_chr1	45778565	45779680	+	1116	4	5	0	2	0	4
CSbapl.2743	BAPLcs_chr1;BAPLcs_chr1;BAPLcs_chr1;BAPLcs_chr1;BAPLcs_chr1	45784613;45785563;45786494;45788392;45789164	45784678;45785614;45786559;45788537;45789328	+;+;+;+;+	495	6	12	0	11	8	5
CSbapl.2746	BAPLcs_chr1;BAPLcs_chr1;BAPLcs_chr1;BAPLcs_chr1;BAPLcs_chr1;BAPLcs_chr1;BAPLcs_chr1;BAPLcs_chr1;BAPLcs_chr1	45793443;45799700;45799739;45800750;45800750;45802987;45802987;45803759;45803759	45793508;45799790;45799790;45800815;45800815;45803132;45803132;45803923;45803923	+;+;+;+;+;+;+;+;+	534	54	51	66	33	62	66
CSbapl.2747	BAPLcs_chr1;BAPLcs_chr1	45796318;45798832	45797934;45798978	-;-	1764	0	0	2	2	0	4
CSbapl.2749	BAPLcs_chr1;BAPLcs_chr1;BAPLcs_chr1;BAPLcs_chr1;BAPLcs_chr1;BAPLcs_chr1	45812580;45813157;45813840;45815743;45816544;45816977	45812684;45813351;45813951;45815921;45816625;45817263	+;+;+;+;+;+	960	1	2	0	2	0	1
CSbapl.2753	BAPLcs_chr1;BAPLcs_chr1;BAPLcs_chr1;BAPLcs_chr1;BAPLcs_chr1;BAPLcs_chr1;BAPLcs_chr1;BAPLcs_chr1;BAPLcs_chr1;BAPLcs_chr1;BAPLcs_chr1;BAPLcs_chr1;BAPLcs_chr1;BAPLcs_chr1;BAPLcs_chr1;BAPLcs_chr1;BAPLcs_chr1;BAPLcs_chr1;BAPLcs_chr1;BAPLcs_chr1;BAPLcs_chr1;BAPLcs_chr1;BAPLcs_chr1;BAPLcs_chr1;BAPLcs_chr1;BAPLcs_chr1;BAPLcs_chr1;BAPLcs_chr1;BAPLcs_chr1;BAPLcs_chr1;BAPLcs_chr1;BAPLcs_chr1;BAPLcs_chr1;BAP…	45840233;45840233;45840233;45841224;45841224;45841224;45842166;45842166;45842166;45843256;45843256;45843256;45843256;45863176;45863176;45863176;45863176;45863176;45864374;45864374;45864374;45864374;45864374;45865321;45865380;45865380;45865380;45865380;45865380;45865777;45865777;45865777;45865777;45865777;45865777;45866994;45866994	45840609;45840609;45840609;45841277;45841277;45841277;45842202;45842202;45842202;45843660;45843660;45843660;45843660;45863564;45863564;45863564;45863564;45863564;45864433;45864433;45864433;45864433;45864433;45865416;45865416;45865416;45865416;45865416;45865416;45866226;45866226;45866226;45866269;45866269;45866226;45867082;45867082	-;-;-;-;-;-;-;-;-;-;-;-;-;-;-;-;-;-;-;-;-;-;-;-;-;-;-;-;-;-;-;-;-;-;-;-;-	2000	949	2181	317	231	255	418
CSbapl.2754	BAPLcs_chr1;BAPLcs_chr1;BAPLcs_chr1;BAPLcs_chr1;BAPLcs_chr1;BAPLcs_chr1;BAPLcs_chr1;BAPLcs_chr1;BAPLcs_chr1	45939735;45939735;45943621;45943621;45944667;45944667;45945293;45945293;45946331	45940150;45940150;45943725;45943725;45944703;45944703;45945883;45945883;45946336	-;-;-;-;-;-;-;-;-	1155	2	3	0	4	2	0
CSbapl.2755	BAPLcs_chr1;BAPLcs_chr1	45954189;45955105	45954638;45956598	-;-	1944	0	3	0	9	0	0
CSbapl.2756	BAPLcs_chr1;BAPLcs_chr1;BAPLcs_chr1;BAPLcs_chr1;BAPLcs_chr1;BAPLcs_chr1;BAPLcs_chr1;BAPLcs_chr1;BAPLcs_chr1;BAPLcs_chr1;BAPLcs_chr1;BAPLcs_chr1;BAPLcs_chr1;BAPLcs_chr1	45960241;45960316;45962651;45962651;45963685;45963685;45964311;45964311;45965324;45975467;45976281;45976281;45976976;45976976	45960656;45960656;45962755;45962755;45963721;45963721;45964898;45964898;45965572;45975571;45976862;45976862;45977041;45977041	-;-;-;-;-;-;-;-;-;-;-;-;-;-	2148	0	12	0	9	0	0
CSbapl.2763	BAPLcs_chr1;BAPLcs_chr1;BAPLcs_chr1	46008409;46011093;46024874	46009545;46011154;46024976	-;-;-	1302	0	0	4	0	2	0
CSbapl.2770	BAPLcs_chr1	46052610	46053350	+	741	11	2	0	6	1	2
CSbapl.2781	BAPLcs_chr1	46091988	46092383	+	396	1	5	3	3	1	3
CSbapl.2784	BAPLcs_chr1	46103193	46104416	-	1224	0	0	2	0	2	1
CSbapl.2793	BAPLcs_chr1;BAPLcs_chr1;BAPLcs_chr1;BAPLcs_chr1;BAPLcs_chr1;BAPLcs_chr1;BAPLcs_chr1;BAPLcs_chr1;BAPLcs_chr1;BAPLcs_chr1;BAPLcs_chr1;BAPLcs_chr1;BAPLcs_chr1;BAPLcs_chr1;BAPLcs_chr1;BAPLcs_chr1;BAPLcs_chr1;BAPLcs_chr1;BAPLcs_chr1;BAPLcs_chr1;BAPLcs_chr1;BAPLcs_chr1;BAPLcs_chr1;BAPLcs_chr1;BAPLcs_chr1;BAPLcs_chr1;BAPLcs_chr1;BAPLcs_chr1;BAPLcs_chr1;BAPLcs_chr1;BAPLcs_chr1;BAPLcs_chr1;BAPLcs_chr1;BAP…	46138506;46138506;46138506;46138506;46138506;46140540;46140540;46140540;46140540;46140540;46141424;46141424;46141424;46141424;46141424;46154224;46154224;46154224;46154224;46154224;46155837;46155837;46155837;46155837;46155837;46157409;46157409;46157409;46157409;46157409;46160156;46160156;46160156;46160156;46160156;46162085;46162085;46162085;46162207;46162207;46167337;46167337;46167337;46167337;461…	46138563;46138563;46138563;46138563;46138563;46140685;46140685;46140685;46140685;46140685;46141577;46141577;46141577;46141577;46141577;46154356;46154356;46154356;46154356;46154356;46155975;46155975;46155975;46155975;46155975;46157472;46157472;46157472;46157472;46157472;46160253;46160253;46160253;46160253;46160253;46162145;46162145;46162145;46162267;46162267;46167458;46167458;46167458;46167458;461…	+;+;+;+;+;+;+;+;+;+;+;+;+;+;+;+;+;+;+;+;+;+;+;+;+;+;+;+;+;+;+;+;+;+;+;+;+;+;+;+;+;+;+;+;+;+;+;+;+;+;+;+;+;+;+;+;+;+;+;+;+;+;+;+;+;+;+;+;+;+	1534	183	449	136	247	376	244
CSbapl.2794	BAPLcs_chr1;BAPLcs_chr1;BAPLcs_chr1;BAPLcs_chr1;BAPLcs_chr1;BAPLcs_chr1;BAPLcs_chr1;BAPLcs_chr1;BAPLcs_chr1;BAPLcs_chr1;BAPLcs_chr1;BAPLcs_chr1;BAPLcs_chr1;BAPLcs_chr1;BAPLcs_chr1;BAPLcs_chr1;BAPLcs_chr1;BAPLcs_chr1;BAPLcs_chr1;BAPLcs_chr1;BAPLcs_chr1;BAPLcs_chr1;BAPLcs_chr1;BAPLcs_chr1;BAPLcs_chr1;BAPLcs_chr1;BAPLcs_chr1;BAPLcs_chr1;BAPLcs_chr1;BAPLcs_chr1;BAPLcs_chr1;BAPLcs_chr1;BAPLcs_chr1;BAP…	46187981;46187981;46187981;46187981;46187981;46189270;46189270;46189270;46189270;46189270;46190197;46190220;46190220;46190220;46190220;46190220;46192424;46192424;46192424;46192424;46192424;46192424;46194756;46194756;46194756;46194756;46194756;46194756;46196514;46196514;46196514;46196514;46196514;46196514;46197099;46197099;46197099;46197105;46197105;46201203;46202142;46202142;46202142;46202142;462…	46188309;46188309;46188309;46188309;46188309;46189479;46189479;46189479;46189479;46189479;46190300;46190300;46190300;46190300;46190300;46190300;46192517;46192517;46192517;46192517;46192517;46192517;46194861;46194861;46194861;46194861;46194861;46194861;46196616;46196616;46196616;46196616;46196616;46196616;46197192;46197192;46197192;46197192;46197192;46201293;46202273;46202273;46202273;46202273;462…	-;-;-;-;-;-;-;-;-;-;-;-;-;-;-;-;-;-;-;-;-;-;-;-;-;-;-;-;-;-;-;-;-;-;-;-;-;-;-;-;-;-;-;-;-;-;-;-;-;-;-;-;-;-;-;-;-;-	1464	224	327	130	463	323	418
CSbapl.2795	BAPLcs_chr1	46224937	46226583	-	1647	2	0	0	0	0	4
CSbapl.2796	BAPLcs_chr1	46228662	46228988	+	327	3	4	1	0	0	0
CSbapl.2801	BAPLcs_chr1;BAPLcs_chr1;BAPLcs_chr1	46283287;46285676;46287206	46283430;46285864;46287283	+;+;+	411	26	238	13	70	66	89
CSbapl.2803	BAPLcs_chr1	46333027	46335576	-	2550	4	4	4	0	1	0
CSbapl.2809	BAPLcs_chr1;BAPLcs_chr1;BAPLcs_chr1;BAPLcs_chr1;BAPLcs_chr1;BAPLcs_chr1;BAPLcs_chr1;BAPLcs_chr1;BAPLcs_chr1;BAPLcs_chr1;BAPLcs_chr1;BAPLcs_chr1;BAPLcs_chr1;BAPLcs_chr1;BAPLcs_chr1	46394306;46394306;46394306;46396818;46396818;46396818;46400569;46400569;46400569;46403148;46403148;46403148;46403944;46403944;46403944	46394492;46394492;46394492;46396961;46396961;46396961;46401345;46401345;46401345;46403198;46403198;46403198;46404284;46404284;46404284	+;+;+;+;+;+;+;+;+;+;+;+;+;+;+	1500	78	58	21	36	27	55
CSbapl.2811	BAPLcs_chr1;BAPLcs_chr1	46420821;46421308	46421022;46422137	+;+	1032	8	6	9	17	21	4
CSbapl.2812	BAPLcs_chr1;BAPLcs_chr1;BAPLcs_chr1;BAPLcs_chr1;BAPLcs_chr1;BAPLcs_chr1;BAPLcs_chr1;BAPLcs_chr1;BAPLcs_chr1;BAPLcs_chr1	46435429;46435429;46436350;46436350;46437433;46437433;46439015;46439015;46443651;46443651	46435615;46435615;46436493;46436493;46437720;46437720;46439065;46439065;46443991;46443991	+;+;+;+;+;+;+;+;+;+	1011	58	72	70	84	124	73
CSbapl.2813	BAPLcs_chr1;BAPLcs_chr1;BAPLcs_chr1;BAPLcs_chr1;BAPLcs_chr1;BAPLcs_chr1;BAPLcs_chr1;BAPLcs_chr1;BAPLcs_chr1;BAPLcs_chr1;BAPLcs_chr1;BAPLcs_chr1;BAPLcs_chr1;BAPLcs_chr1;BAPLcs_chr1;BAPLcs_chr1;BAPLcs_chr1;BAPLcs_chr1;BAPLcs_chr1;BAPLcs_chr1;BAPLcs_chr1;BAPLcs_chr1;BAPLcs_chr1;BAPLcs_chr1;BAPLcs_chr1	46448397;46449166;46449814;46453415;46456220;46457159;46457665;46459120;46460707;46464470;46468247;46469747;46470319;46471154;46471953;46472327;46473792;46475502;46476473;46477281;46478477;46478938;46480593;46482304;46483576	46448537;46449259;46449961;46455865;46456369;46457231;46457749;46459234;46461398;46464732;46468334;46469812;46470515;46471249;46472066;46472419;46473947;46475600;46476589;46477361;46478512;46479100;46480677;46482391;46485498	+;+;+;+;+;+;+;+;+;+;+;+;+;+;+;+;+;+;+;+;+;+;+;+;+	7614	245	279	171	648	826	903
CSbapl.2816	BAPLcs_chr1;BAPLcs_chr1;BAPLcs_chr1;BAPLcs_chr1;BAPLcs_chr1	46493226;46494174;46496333;46497104;46499131	46493396;46494863;46496437;46497652;46500669	+;+;+;+;+	3054	130	274	28	20	294	93
CSbapl.2817	BAPLcs_chr1;BAPLcs_chr1;BAPLcs_chr1;BAPLcs_chr1;BAPLcs_chr1;BAPLcs_chr1;BAPLcs_chr1;BAPLcs_chr1;BAPLcs_chr1;BAPLcs_chr1;BAPLcs_chr1;BAPLcs_chr1;BAPLcs_chr1;BAPLcs_chr1;BAPLcs_chr1;BAPLcs_chr1	46503524;46504690;46505288;46506092;46522271;46527474;46528502;46529557;46531940;46535232;46537383;46589876;46590904;46591951;46594211;46597471	46503576;46504776;46505455;46506238;46522298;46527521;46528565;46529626;46532073;46535308;46537811;46589923;46590967;46592020;46594344;46597547	-;-;-;-;-;-;-;-;-;-;-;-;-;-;-;-	1698	368	302	361	913	564	824
CSbapl.2818	BAPLcs_chr1;BAPLcs_chr1;BAPLcs_chr1;BAPLcs_chr1;BAPLcs_chr1;BAPLcs_chr1;BAPLcs_chr1;BAPLcs_chr1;BAPLcs_chr1;BAPLcs_chr1;BAPLcs_chr1;BAPLcs_chr1;BAPLcs_chr1;BAPLcs_chr1;BAPLcs_chr1;BAPLcs_chr1;BAPLcs_chr1;BAPLcs_chr1;BAPLcs_chr1;BAPLcs_chr1;BAPLcs_chr1;BAPLcs_chr1;BAPLcs_chr1;BAPLcs_chr1;BAPLcs_chr1;BAPLcs_chr1;BAPLcs_chr1;BAPLcs_chr1;BAPLcs_chr1;BAPLcs_chr1;BAPLcs_chr1;BAPLcs_chr1;BAPLcs_chr1;BAP…	46552212;46552212;46577605;46615995;46615995;46615995;46620658;46620658;46626038;46626038;46626038;46626038;46626038;46626038;46626046;46630385;46630385;46630385;46630385;46630385;46630385;46630385;46632760;46632760;46632760;46632760;46632760;46632760;46632760;46633837;46633837;46633837;46633837;46633837;46633837;46633837;46636397;46636397;46636397;46636397;46636397;46636397;46636397;46637774;466…	46552662;46552662;46577723;46616445;46616445;46616445;46620685;46620685;46626121;46626121;46626121;46626121;46626121;46626121;46626121;46630499;46630499;46630499;46630499;46630499;46630499;46630499;46632850;46632850;46632850;46632850;46632850;46632850;46632850;46633950;46633950;46633950;46633950;46633950;46633950;46633950;46636513;46636513;46636513;46636513;46636513;46636513;46636513;46638033;466…	+;+;+;+;+;+;+;+;+;+;+;+;+;+;+;+;+;+;+;+;+;+;+;+;+;+;+;+;+;+;+;+;+;+;+;+;+;+;+;+;+;+;+;+;+;+;+;+;+;+;+;+;+;+;+;+;+;+;+;+;+;+;+;+;+;+;+;+;+;+;+;+;+;+;+;+;+;+;+;+;+;+;+;+;+;+;+;+;+;+;+;+;+;+;+;+;+;+;+;+;+;+;+;+;+;+;+;+;+;+;+;+;+;+;+;+;+;+;+;+;+;+;+;+;+;+;+;+;+;+;+;+;+;+;+;+;+;+;+;+;+;+;+;+;+;+;+;+;+;+;+;+;+;+;+;+;+;+;+;+;+;+;+;+;+	4407	512	1590	205	97	296	370
CSbapl.2822	BAPLcs_chr1;BAPLcs_chr1;BAPLcs_chr1;BAPLcs_chr1;BAPLcs_chr1;BAPLcs_chr1;BAPLcs_chr1;BAPLcs_chr1;BAPLcs_chr1;BAPLcs_chr1;BAPLcs_chr1;BAPLcs_chr1;BAPLcs_chr1;BAPLcs_chr1;BAPLcs_chr1;BAPLcs_chr1;BAPLcs_chr1;BAPLcs_chr1;BAPLcs_chr1;BAPLcs_chr1;BAPLcs_chr1;BAPLcs_chr1;BAPLcs_chr1;BAPLcs_chr1;BAPLcs_chr1;BAPLcs_chr1;BAPLcs_chr1;BAPLcs_chr1;BAPLcs_chr1;BAPLcs_chr1;BAPLcs_chr1;BAPLcs_chr1;BAPLcs_chr1;BAP…	46712381;46721261;46721261;46721261;46722049;46722049;46722049;46723007;46723007;46723007;46723007;46724311;46724311;46724311;46724311;46729390;46729390;46729390;46729390;46732708;46732708;46732708;46737513;46737513;46737635;46739500;46739500;46739500;46743078;46743078;46743078;46744562;46744562;46744562;46746174;46746174;46746174	46712479;46721287;46721287;46721287;46722150;46722150;46722150;46723172;46723172;46723172;46723172;46724438;46724438;46724438;46724438;46729464;46729464;46729464;46729401;46732829;46732829;46732829;46737573;46737573;46737695;46739597;46739597;46739597;46743141;46743141;46743141;46744700;46744700;46744700;46746304;46746289;46746289	-;-;-;-;-;-;-;-;-;-;-;-;-;-;-;-;-;-;-;-;-;-;-;-;-;-;-;-;-;-;-;-;-;-;-;-;-	1273	101	147	72	75	136	140
CSbapl.2831	BAPLcs_chr1;BAPLcs_chr1;BAPLcs_chr1;BAPLcs_chr1	46812518;46815519;46817540;46830785	46813876;46815628;46817678;46830919	-;-;-;-	1743	257	812	58	18	84	142
CSbapl.2833	BAPLcs_chr1;BAPLcs_chr1	46834726;46843696	46835330;46843756	-;-	666	7	8	0	9	6	10
CSbapl.2834	BAPLcs_chr1;BAPLcs_chr1	46850963;46852005	46851357;46852065	-;-	456	3	2	0	3	0	4
CSbapl.2835	BAPLcs_chr1;BAPLcs_chr1;BAPLcs_chr1;BAPLcs_chr1;BAPLcs_chr1;BAPLcs_chr1	46857916;46865860;46866990;46867784;46868827;46870582	46858097;46866015;46867134;46867899;46868948;46870646	-;-;-;-;-;-	786	475	488	408	624	701	932
CSbapl.2837	BAPLcs_chr1;BAPLcs_chr1;BAPLcs_chr1;BAPLcs_chr1;BAPLcs_chr1;BAPLcs_chr1;BAPLcs_chr1;BAPLcs_chr1;BAPLcs_chr1;BAPLcs_chr1;BAPLcs_chr1;BAPLcs_chr1;BAPLcs_chr1;BAPLcs_chr1;BAPLcs_chr1;BAPLcs_chr1;BAPLcs_chr1;BAPLcs_chr1;BAPLcs_chr1;BAPLcs_chr1;BAPLcs_chr1;BAPLcs_chr1;BAPLcs_chr1;BAPLcs_chr1;BAPLcs_chr1;BAPLcs_chr1;BAPLcs_chr1;BAPLcs_chr1	46870731;46870734;46870740;46871026;46873456;46873456;46873456;46873456;46875435;46875435;46875435;46875435;46876723;46876723;46876723;46876727;46878963;46878963;46878963;46878963;46879834;46879834;46879834;46879834;46880703;46880703;46880703;46880703	46870792;46870792;46870849;46871033;46873549;46873549;46873549;46873549;46875563;46875567;46875563;46875563;46876827;46876827;46876827;46876827;46879115;46879115;46879115;46879115;46879970;46879970;46879970;46879970;46880745;46880745;46880745;46880745	+;+;+;+;+;+;+;+;+;+;+;+;+;+;+;+;+;+;+;+;+;+;+;+;+;+;+;+	792	203	346	171	180	284	265
CSbapl.2838	BAPLcs_chr1;BAPLcs_chr1	46885672;46885672	46886706;46886706	-;-	1035	225	152	148	223	202	184
CSbapl.2839	BAPLcs_chr1;BAPLcs_chr1;BAPLcs_chr1;BAPLcs_chr1;BAPLcs_chr1;BAPLcs_chr1;BAPLcs_chr1;BAPLcs_chr1;BAPLcs_chr1;BAPLcs_chr1;BAPLcs_chr1;BAPLcs_chr1;BAPLcs_chr1;BAPLcs_chr1;BAPLcs_chr1;BAPLcs_chr1;BAPLcs_chr1;BAPLcs_chr1	46888652;46888655;46888655;46888670;46894606;46894606;46894606;46894606;46896557;46896557;46896557;46896557;46902509;46902509;46902509;46902509;46904763;46904763	46888881;46888881;46888881;46888881;46894716;46894716;46894716;46894716;46896671;46896671;46896671;46896671;46902599;46902631;46902631;46902599;46904929;46904929	+;+;+;+;+;+;+;+;+;+;+;+;+;+;+;+;+;+	746	44	56	21	56	87	64
CSbapl.2840	BAPLcs_chr1;BAPLcs_chr1;BAPLcs_chr1;BAPLcs_chr1;BAPLcs_chr1;BAPLcs_chr1;BAPLcs_chr1;BAPLcs_chr1;BAPLcs_chr1;BAPLcs_chr1;BAPLcs_chr1;BAPLcs_chr1;BAPLcs_chr1;BAPLcs_chr1;BAPLcs_chr1;BAPLcs_chr1	46920019;46920019;46920973;46920973;46922267;46922267;46924169;46924169;46925120;46926650;46928238;46929079;46929817;46931348;46932385;46934001	46920195;46920195;46921128;46921128;46923035;46923035;46925118;46925118;46925739;46926935;46928405;46929135;46929936;46931447;46932529;46934361	-;-;-;-;-;-;-;-;-;-;-;-;-;-;-;-	3909	555	579	358	412	339	447
CSbapl.2841	BAPLcs_chr1;BAPLcs_chr1;BAPLcs_chr1;BAPLcs_chr1;BAPLcs_chr1;BAPLcs_chr1;BAPLcs_chr1;BAPLcs_chr1;BAPLcs_chr1;BAPLcs_chr1;BAPLcs_chr1;BAPLcs_chr1;BAPLcs_chr1;BAPLcs_chr1;BAPLcs_chr1;BAPLcs_chr1;BAPLcs_chr1;BAPLcs_chr1;BAPLcs_chr1;BAPLcs_chr1;BAPLcs_chr1;BAPLcs_chr1;BAPLcs_chr1;BAPLcs_chr1;BAPLcs_chr1;BAPLcs_chr1;BAPLcs_chr1;BAPLcs_chr1;BAPLcs_chr1;BAPLcs_chr1;BAPLcs_chr1;BAPLcs_chr1;BAPLcs_chr1;BAP…	46945489;46947022;46947031;46948297;46948297;46949317;46949317;46950350;46950350;46951343;46951343;46953714;46953714;46955032;46955032;46955468;46955468;46956048;46956048;46958187;46958187;46958965;46958965;46959526;46959526;46960141;46960141;46960749;46960749;46962205;46962205;46963052;46963052;46965565;46965565;46966557;46966557;46968329;46968329;46968913;46968913;46969519;46969519;46971309;469…	46945506;46947149;46947149;46948382;46948382;46949447;46949447;46950462;46950462;46951517;46951517;46953810;46953810;46955107;46955107;46955568;46955568;46956147;46956147;46958247;46958247;46959120;46959120;46959612;46959612;46960260;46960260;46960970;46960970;46962333;46962333;46963216;46963216;46965688;46965688;46966655;46966655;46968423;46968423;46969119;46969119;46969650;46969650;46971439;469…	+;+;+;+;+;+;+;+;+;+;+;+;+;+;+;+;+;+;+;+;+;+;+;+;+;+;+;+;+;+;+;+;+;+;+;+;+;+;+;+;+;+;+;+;+;+;+;+;+;+;+;+;+;+;+;+;+;+;+;+;+;+;+;+;+;+;+;+;+;+;+;+;+;+;+;+;+;+;+;+;+	4593	251	543	155	172	174	235
CSbapl.2842	BAPLcs_chr1;BAPLcs_chr1;BAPLcs_chr1;BAPLcs_chr1;BAPLcs_chr1;BAPLcs_chr1;BAPLcs_chr1;BAPLcs_chr1;BAPLcs_chr1;BAPLcs_chr1;BAPLcs_chr1;BAPLcs_chr1;BAPLcs_chr1;BAPLcs_chr1;BAPLcs_chr1;BAPLcs_chr1;BAPLcs_chr1;BAPLcs_chr1;BAPLcs_chr1;BAPLcs_chr1;BAPLcs_chr1;BAPLcs_chr1;BAPLcs_chr1;BAPLcs_chr1;BAPLcs_chr1;BAPLcs_chr1;BAPLcs_chr1;BAPLcs_chr1	47001733;47001733;47002324;47002324;47002727;47002727;47002727;47002727;47003443;47003443;47003443;47003443;47005244;47005244;47005244;47005244;47006414;47006414;47006414;47006414;47007376;47007376;47007376;47007376;47034535;47034535;47034535;47034535	47001813;47001813;47002344;47002344;47002824;47002824;47002824;47002824;47003532;47003535;47003532;47003535;47005394;47005394;47005394;47005394;47006580;47006580;47006580;47006580;47007608;47007608;47007608;47007608;47034989;47034989;47034989;47034989	-;-;-;-;-;-;-;-;-;-;-;-;-;-;-;-;-;-;-;-;-;-;-;-;-;-;-;-	1299	599	1134	318	442	527	459
CSbapl.2846	BAPLcs_chr1;BAPLcs_chr1;BAPLcs_chr1;BAPLcs_chr1;BAPLcs_chr1;BAPLcs_chr1;BAPLcs_chr1;BAPLcs_chr1;BAPLcs_chr1;BAPLcs_chr1;BAPLcs_chr1;BAPLcs_chr1;BAPLcs_chr1;BAPLcs_chr1;BAPLcs_chr1;BAPLcs_chr1;BAPLcs_chr1;BAPLcs_chr1;BAPLcs_chr1;BAPLcs_chr1;BAPLcs_chr1;BAPLcs_chr1;BAPLcs_chr1;BAPLcs_chr1;BAPLcs_chr1;BAPLcs_chr1;BAPLcs_chr1;BAPLcs_chr1;BAPLcs_chr1;BAPLcs_chr1;BAPLcs_chr1;BAPLcs_chr1;BAPLcs_chr1;BAP…	47048531;47048531;47050816;47050816;47051721;47051721;47052352;47052352;47060219;47060219;47068038;47068038;47068928;47068928;47070672;47070672;47072087;47072087;47073511;47073511;47076076;47076076;47078386;47078386;47079064;47079064;47080861;47080861;47081349;47081349;47081742;47081742;47086969;47086969;47089485;47089485;47090707;47100067	47048632;47048632;47050950;47050950;47051804;47051804;47052463;47052463;47061303;47061303;47068161;47068161;47069153;47069153;47070907;47070907;47072257;47072257;47073665;47073665;47076253;47076253;47078573;47078573;47079198;47079198;47080925;47080925;47081408;47081408;47081824;47081824;47087072;47087072;47089889;47089865;47090897;47100151	+;+;+;+;+;+;+;+;+;+;+;+;+;+;+;+;+;+;+;+;+;+;+;+;+;+;+;+;+;+;+;+;+;+;+;+;+;+	3924	291	438	242	311	567	527
CSbapl.2861	BAPLcs_chr1	47241072	47241878	-	807	50	377	18	11	44	95
CSbapl.2867	BAPLcs_chr1;BAPLcs_chr1;BAPLcs_chr1;BAPLcs_chr1;BAPLcs_chr1;BAPLcs_chr1;BAPLcs_chr1;BAPLcs_chr1;BAPLcs_chr1;BAPLcs_chr1;BAPLcs_chr1;BAPLcs_chr1;BAPLcs_chr1;BAPLcs_chr1;BAPLcs_chr1;BAPLcs_chr1;BAPLcs_chr1;BAPLcs_chr1;BAPLcs_chr1;BAPLcs_chr1;BAPLcs_chr1;BAPLcs_chr1;BAPLcs_chr1;BAPLcs_chr1;BAPLcs_chr1;BAPLcs_chr1;BAPLcs_chr1;BAPLcs_chr1;BAPLcs_chr1;BAPLcs_chr1;BAPLcs_chr1;BAPLcs_chr1;BAPLcs_chr1;BAP…	47288609;47289462;47290837;47293072;47293903;47293903;47293903;47293903;47294444;47294444;47294444;47294444;47295480;47295480;47295480;47295480;47299743;47299743;47299743;47299743;47300353;47300353;47300353;47300353;47301134;47301134;47301134;47301134;47301883;47301883;47301883;47301901;47304962;47304962;47304962;47328016;47328869;47330255;47331125;47331184;47331184;47331184;47331184;47331963;473…	47288679;47289651;47291084;47293176;47294172;47294172;47294172;47294172;47294517;47294517;47294517;47294517;47295723;47295723;47295723;47295723;47299981;47299981;47299981;47299981;47300451;47300451;47300451;47300451;47301227;47301227;47301227;47301227;47302203;47302204;47302204;47302204;47305023;47305023;47305023;47328086;47329058;47330502;47331230;47331230;47331230;47331230;47331230;47332416;473…	-;-;-;-;-;-;-;-;-;-;-;-;-;-;-;-;-;-;-;-;-;-;-;-;-;-;-;-;-;-;-;-;-;-;-;-;-;-;-;-;-;-;-;-;-;-;-;-;-;-;-;-;-;-;-;-;-;-;-;-;-;-;-;-;-;-;-;-;-;-;-;-;-;-;-;-;-;-;-;-;-;-;-;-;-	4212	220	855	109	90	108	88
CSbapl.2871	BAPLcs_chr1;BAPLcs_chr1;BAPLcs_chr1;BAPLcs_chr1;BAPLcs_chr1;BAPLcs_chr1;BAPLcs_chr1	47369249;47380581;47381545;47386266;47388941;47389293;47390399	47369929;47380723;47381707;47386357;47389081;47389467;47390572	+;+;+;+;+;+;+	1569	0	2	0	19	16	18
CSbapl.2876	BAPLcs_chr1;BAPLcs_chr1	47394410;47398576	47395844;47398808	-;-	1668	1003	3353	652	628	864	981
CSbapl.2878	BAPLcs_chr1;BAPLcs_chr1;BAPLcs_chr1;BAPLcs_chr1;BAPLcs_chr1;BAPLcs_chr1;BAPLcs_chr1;BAPLcs_chr1;BAPLcs_chr1;BAPLcs_chr1;BAPLcs_chr1;BAPLcs_chr1;BAPLcs_chr1	47416741;47416741;47417676;47417676;47419801;47419801;47425751;47425751;47431730;47478186;47479899;47483014;47483014	47416872;47416872;47417864;47417864;47419891;47419891;47425859;47425859;47431979;47478343;47480054;47483179;47483179	-;-;-;-;-;-;-;-;-;-;-;-;-	1251	99	227	117	230	190	286
CSbapl.2880	BAPLcs_chr1;BAPLcs_chr1;BAPLcs_chr1;BAPLcs_chr1;BAPLcs_chr1;BAPLcs_chr1;BAPLcs_chr1;BAPLcs_chr1	47441358;47456219;47457567;47458790;47459903;47462026;47462647;47464668	47441751;47456375;47457778;47458901;47460066;47462208;47462799;47464846	+;+;+;+;+;+;+;+	1554	0	4	10	6	0	0
CSbapl.2881	BAPLcs_chr1;BAPLcs_chr1;BAPLcs_chr1;BAPLcs_chr1;BAPLcs_chr1;BAPLcs_chr1;BAPLcs_chr1;BAPLcs_chr1;BAPLcs_chr1;BAPLcs_chr1;BAPLcs_chr1;BAPLcs_chr1;BAPLcs_chr1;BAPLcs_chr1;BAPLcs_chr1;BAPLcs_chr1;BAPLcs_chr1;BAPLcs_chr1;BAPLcs_chr1;BAPLcs_chr1;BAPLcs_chr1;BAPLcs_chr1;BAPLcs_chr1;BAPLcs_chr1;BAPLcs_chr1;BAPLcs_chr1;BAPLcs_chr1;BAPLcs_chr1;BAPLcs_chr1;BAPLcs_chr1;BAPLcs_chr1;BAPLcs_chr1;BAPLcs_chr1;BAP…	47496300;47498966;47501414;47501414;47501414;47503880;47504434;47504434;47504434;47504978;47504978;47504978;47506695;47506695;47506695;47507244;47507244;47507244;47511361;47511361;47511361;47514021;47514021;47514021;47518388;47518388;47518388;47521441;47521441;47521441;47523714;47523714;47523714;47525057;47525057;47525057;47526679;47526679;47526679;47527469;47527469;47527469;47528575;47528575;475…	47496576;47499228;47501449;47501449;47501449;47503945;47504507;47504507;47504507;47505140;47505140;47505140;47506784;47506784;47506784;47507326;47507326;47507326;47511428;47511428;47511428;47514139;47514139;47514139;47518463;47518463;47518463;47521569;47521569;47521569;47523751;47523751;47523751;47525123;47525123;47525123;47526789;47526789;47526789;47527662;47527662;47527662;47528685;47528685;475…	+;+;+;+;+;+;+;+;+;+;+;+;+;+;+;+;+;+;+;+;+;+;+;+;+;+;+;+;+;+;+;+;+;+;+;+;+;+;+;+;+;+;+;+;+;+;+;+;+;+;+;+;+;+;+;+;+;+;+;+	2496	693	725	718	2274	1217	2105
CSbapl.2882	BAPLcs_chr1;BAPLcs_chr1;BAPLcs_chr1;BAPLcs_chr1;BAPLcs_chr1;BAPLcs_chr1;BAPLcs_chr1;BAPLcs_chr1;BAPLcs_chr1;BAPLcs_chr1;BAPLcs_chr1;BAPLcs_chr1;BAPLcs_chr1;BAPLcs_chr1;BAPLcs_chr1;BAPLcs_chr1;BAPLcs_chr1;BAPLcs_chr1;BAPLcs_chr1;BAPLcs_chr1;BAPLcs_chr1;BAPLcs_chr1;BAPLcs_chr1;BAPLcs_chr1;BAPLcs_chr1;BAPLcs_chr1;BAPLcs_chr1;BAPLcs_chr1;BAPLcs_chr1;BAPLcs_chr1;BAPLcs_chr1;BAPLcs_chr1;BAPLcs_chr1;BAP…	47598652;47601063;47602043;47603056;47626369;47627348;47628360;47629767;47630659;47631156;47632568;47633928;47651650;47653436;47653477;47656268;47656729;47656729;47657411;47657532;47657532;47657532;47657532;47660052;47660052;47660052;47660052;47660052;47660052;47663280;47663280;47663280;47663280;47663280;47664097;47664097;47664097;47664097;47664102;47664838;47664838;47664838;47664838;47665678;476…	47598816;47601183;47602219;47603237;47626489;47627524;47628541;47629845;47630780;47631221;47632713;47634117;47651773;47653602;47653602;47656453;47656849;47656849;47657586;47657586;47657586;47657586;47657586;47660233;47660233;47660120;47660233;47660233;47660233;47663358;47663358;47663358;47663358;47663358;47664218;47664218;47664218;47664218;47664130;47664903;47664903;47664903;47664903;47665827;476…	+;+;+;+;+;+;+;+;+;+;+;+;+;+;+;+;+;+;+;+;+;+;+;+;+;+;+;+;+;+;+;+;+;+;+;+;+;+;+;+;+;+;+;+;+;+;+;+;+;+	3291	481	1732	391	51	90	144
CSbapl.2886	BAPLcs_chr1	47679550	47679942	-	393	0	0	0	0	1	0
CSbapl.2888	BAPLcs_chr1;BAPLcs_chr1;BAPLcs_chr1;BAPLcs_chr1	47720078;47720079;47720386;47720519	47720236;47720795;47720423;47720795	+;+;+;+	718	0	0	0	5	1	0
CSbapl.2889	BAPLcs_chr1;BAPLcs_chr1	47730347;47776496	47730450;47777879	+;+	1488	16	80	2	0	15	6
CSbapl.2900	BAPLcs_chr1;BAPLcs_chr1;BAPLcs_chr1;BAPLcs_chr1;BAPLcs_chr1;BAPLcs_chr1	47808789;47808898;47810484;47810484;47816932;47816932	47808974;47808954;47810661;47810661;47817017;47817017	-;-;-;-;-;-	450	1704	1531	954	48	235	149
CSbapl.2905	BAPLcs_chr1;BAPLcs_chr1;BAPLcs_chr1;BAPLcs_chr1;BAPLcs_chr1;BAPLcs_chr1;BAPLcs_chr1	47855337;47855337;47855337;47855337;47858775;47858775;47858775	47857543;47857543;47857543;47857541;47858985;47858985;47858985	+;+;+;+;+;+;+	2418	61	102	32	147	119	126
CSbapl.2911	BAPLcs_chr1;BAPLcs_chr1;BAPLcs_chr1;BAPLcs_chr1;BAPLcs_chr1;BAPLcs_chr1;BAPLcs_chr1;BAPLcs_chr1;BAPLcs_chr1;BAPLcs_chr1;BAPLcs_chr1;BAPLcs_chr1;BAPLcs_chr1;BAPLcs_chr1;BAPLcs_chr1;BAPLcs_chr1;BAPLcs_chr1;BAPLcs_chr1;BAPLcs_chr1	47888599;47893443;47894418;47899174;47899818;47902050;47902401;47905257;47905899;47911344;47912775;47915473;47916695;47917966;47919270;47919624;47921767;47922793;47923792	47889162;47893585;47894580;47899265;47899959;47902189;47902575;47905348;47906043;47911492;47913042;47915671;47916864;47918176;47919351;47919757;47921924;47922984;47923896	+;+;+;+;+;+;+;+;+;+;+;+;+;+;+;+;+;+;+	3324	6	10	7	76	86	56
CSbapl.2913	BAPLcs_chr1	47908087	47908476	+	390	4	9	4	1	17	10
CSbapl.2919	BAPLcs_chr1;BAPLcs_chr1;BAPLcs_chr1;BAPLcs_chr1;BAPLcs_chr1;BAPLcs_chr1;BAPLcs_chr1;BAPLcs_chr1;BAPLcs_chr1;BAPLcs_chr1;BAPLcs_chr1;BAPLcs_chr1;BAPLcs_chr1;BAPLcs_chr1;BAPLcs_chr1	47945075;47951698;47952758;47953337;47962188;47965484;47966613;47967268;47968187;47970226;47972437;47973083;47975449;47976453;47995067	47945707;47951889;47952915;47953470;47962336;47965555;47966807;47967369;47968361;47970365;47972578;47973174;47975611;47976595;47995630	-;-;-;-;-;-;-;-;-;-;-;-;-;-;-	3054	26	29	20	106	114	53
CSbapl.2925	BAPLcs_chr1	47963022	47963636	-	615	5	10	6	11	22	20
CSbapl.2926	BAPLcs_chr1	47983409	47983711	+	303	0	0	0	2	0	0
CSbapl.2930	BAPLcs_chr1;BAPLcs_chr1;BAPLcs_chr1;BAPLcs_chr1;BAPLcs_chr1;BAPLcs_chr1;BAPLcs_chr1;BAPLcs_chr1;BAPLcs_chr1;BAPLcs_chr1;BAPLcs_chr1;BAPLcs_chr1;BAPLcs_chr1;BAPLcs_chr1;BAPLcs_chr1;BAPLcs_chr1;BAPLcs_chr1;BAPLcs_chr1;BAPLcs_chr1;BAPLcs_chr1;BAPLcs_chr1;BAPLcs_chr1;BAPLcs_chr1;BAPLcs_chr1;BAPLcs_chr1;BAPLcs_chr1;BAPLcs_chr1;BAPLcs_chr1;BAPLcs_chr1;BAPLcs_chr1;BAPLcs_chr1;BAPLcs_chr1;BAPLcs_chr1;BAP…	48033003;48033003;48033729;48033729;48034458;48034458;48034996;48034996;48035978;48035978;48036725;48036725;48043286;48043286;48043863;48043863;48047083;48047083;48047722;48047722;48049349;48049349;48049645;48049645;48051559;48051559;48052310;48052310;48053682;48053682;48054370;48054370;48054765;48054765;48056471;48056471;48059233;48060228;48061903;48063525;48071864	48033071;48033071;48033806;48033806;48034598;48034598;48035049;48035049;48036076;48036076;48036827;48036827;48043388;48043388;48043973;48043973;48047158;48047158;48047790;48047790;48049423;48049423;48049718;48049718;48051696;48051696;48052392;48052392;48053776;48053776;48054472;48054472;48054843;48054843;48056639;48056588;48059286;48060341;48062019;48063614;48071935	-;-;-;-;-;-;-;-;-;-;-;-;-;-;-;-;-;-;-;-;-;-;-;-;-;-;-;-;-;-;-;-;-;-;-;-;-;-;-;-;-	2166	67	161	69	51	98	88
CSbapl.2931	BAPLcs_chr1;BAPLcs_chr1;BAPLcs_chr1;BAPLcs_chr1;BAPLcs_chr1;BAPLcs_chr1;BAPLcs_chr1;BAPLcs_chr1;BAPLcs_chr1;BAPLcs_chr1;BAPLcs_chr1;BAPLcs_chr1;BAPLcs_chr1;BAPLcs_chr1;BAPLcs_chr1;BAPLcs_chr1;BAPLcs_chr1;BAPLcs_chr1;BAPLcs_chr1;BAPLcs_chr1;BAPLcs_chr1;BAPLcs_chr1;BAPLcs_chr1;BAPLcs_chr1;BAPLcs_chr1;BAPLcs_chr1;BAPLcs_chr1;BAPLcs_chr1;BAPLcs_chr1;BAPLcs_chr1;BAPLcs_chr1;BAPLcs_chr1;BAPLcs_chr1;BAP…	48074645;48074645;48074645;48075067;48075067;48075067;48077914;48077914;48077914;48080820;48080820;48080820;48081931;48081931;48081931;48082426;48082426;48082426;48084829;48084829;48084829;48085457;48085457;48085457;48086019;48086019;48086019;48087348;48087348;48087348;48087923;48087923;48087923;48088488;48088488;48088488;48089928;48089928;48089928;48090205;48090205;48090205;48094413;48094413;480…	48074969;48074969;48074969;48075179;48075179;48075179;48078026;48078026;48078026;48080925;48080925;48080925;48082046;48082046;48082046;48082492;48082492;48082492;48085013;48085013;48085013;48085595;48085595;48085595;48086171;48086171;48086171;48087452;48087452;48087452;48088129;48088129;48088129;48088604;48088604;48088604;48090081;48090081;48090081;48090292;48090292;48090292;48094464;48094464;480…	+;+;+;+;+;+;+;+;+;+;+;+;+;+;+;+;+;+;+;+;+;+;+;+;+;+;+;+;+;+;+;+;+;+;+;+;+;+;+;+;+;+;+;+;+;+;+;+;+;+;+;+;+;+;+;+;+;+;+;+;+;+;+;+;+;+;+;+;+;+;+;+;+;+;+;+;+;+;+;+;+;+;+;+;+;+;+;+;+;+;+;+;+;+;+;+;+;+;+;+;+;+;+;+;+;+;+;+;+;+;+;+;+;+;+;+;+;+;+;+;+;+;+;+;+;+;+;+;+;+;+;+;+;+;+;+;+;+;+;+;+;+;+;+;+;+;+;+;+;+;+;+;+;+;+;+;+;+;+;+;+;+;+;+;+;+;+;+;+;+;+;+;+;+;+;+;+;+;+;+;+;+;+;+;+;+;+;+;+;+;+;+;+;+;+;+;+;+;+;+…	7845	372	603	248	4387	3975	4365
CSbapl.2933	BAPLcs_chr1;BAPLcs_chr1;BAPLcs_chr1;BAPLcs_chr1;BAPLcs_chr1;BAPLcs_chr1;BAPLcs_chr1;BAPLcs_chr1;BAPLcs_chr1;BAPLcs_chr1;BAPLcs_chr1;BAPLcs_chr1;BAPLcs_chr1;BAPLcs_chr1;BAPLcs_chr1;BAPLcs_chr1;BAPLcs_chr1;BAPLcs_chr1;BAPLcs_chr1;BAPLcs_chr1;BAPLcs_chr1;BAPLcs_chr1;BAPLcs_chr1;BAPLcs_chr1;BAPLcs_chr1;BAPLcs_chr1;BAPLcs_chr1;BAPLcs_chr1;BAPLcs_chr1;BAPLcs_chr1	48147881;48147881;48148764;48148764;48151941;48151941;48153834;48153834;48154500;48154500;48155492;48155492;48156070;48156070;48156733;48156733;48159138;48159138;48159860;48159860;48160835;48160835;48161891;48161891;48163916;48163916;48164946;48164946;48166059;48166059	48148023;48148023;48148943;48148943;48152055;48152055;48153975;48153975;48154607;48154607;48155571;48155571;48156198;48156198;48156907;48156907;48159340;48159340;48160024;48160024;48160930;48160930;48162003;48162003;48164003;48164003;48165159;48165159;48166408;48166408	-;-;-;-;-;-;-;-;-;-;-;-;-;-;-;-;-;-;-;-;-;-;-;-;-;-;-;-;-;-	2301	42	71	35	342	269	200
CSbapl.2934	BAPLcs_chr1;BAPLcs_chr1;BAPLcs_chr1;BAPLcs_chr1;BAPLcs_chr1;BAPLcs_chr1;BAPLcs_chr1;BAPLcs_chr1;BAPLcs_chr1;BAPLcs_chr1;BAPLcs_chr1;BAPLcs_chr1;BAPLcs_chr1;BAPLcs_chr1;BAPLcs_chr1;BAPLcs_chr1;BAPLcs_chr1;BAPLcs_chr1;BAPLcs_chr1;BAPLcs_chr1;BAPLcs_chr1;BAPLcs_chr1;BAPLcs_chr1;BAPLcs_chr1;BAPLcs_chr1;BAPLcs_chr1;BAPLcs_chr1;BAPLcs_chr1;BAPLcs_chr1;BAPLcs_chr1;BAPLcs_chr1;BAPLcs_chr1;BAPLcs_chr1;BAP…	48180429;48180429;48186889;48186889;48189304;48189304;48228147;48228147;48228147;48228147;48229084;48229084;48229084;48229084;48230113;48230113;48230113;48230113;48231771;48231771;48231771;48231771;48233774;48233774;48233774;48233774;48234811;48234811;48234811;48234811;48235416;48235416;48235416;48235416;48235995;48235995;48235995;48235995;48237405;48237405;48237405;48237405;48238609;48238609;482…	48180871;48180871;48187068;48187068;48190555;48190555;48228223;48228223;48228223;48228223;48229157;48229157;48229157;48229157;48230234;48230234;48230234;48230234;48231905;48231905;48231905;48231905;48233872;48233872;48233872;48233872;48234881;48234881;48234881;48234881;48235620;48235620;48235620;48235620;48236072;48236072;48236072;48236072;48237558;48237558;48237558;48237558;48238661;48238661;482…	-;-;-;-;-;-;-;-;-;-;-;-;-;-;-;-;-;-;-;-;-;-;-;-;-;-;-;-;-;-;-;-;-;-;-;-;-;-;-;-;-;-;-;-;-;-;-;-;-;-;-;-;-;-;-;-;-;-;-;-;-;-;-;-;-;-;-;-;-;-;-;-;-;-;-;-;-;-;-;-;-;-	3945	336	523	271	324	281	367
CSbapl.2937	BAPLcs_chr1;BAPLcs_chr1;BAPLcs_chr1;BAPLcs_chr1;BAPLcs_chr1;BAPLcs_chr1;BAPLcs_chr1;BAPLcs_chr1	48257729;48257729;48257738;48260128;48260128;48260128;48262112;48262112	48258083;48258193;48258313;48260162;48260203;48260203;48262221;48262221	+;+;+;+;+;+;+;+	771	55	140	43	91	65	69
CSbapl.2938	BAPLcs_chr1;BAPLcs_chr1;BAPLcs_chr1;BAPLcs_chr1;BAPLcs_chr1;BAPLcs_chr1;BAPLcs_chr1;BAPLcs_chr1;BAPLcs_chr1;BAPLcs_chr1;BAPLcs_chr1;BAPLcs_chr1;BAPLcs_chr1	48262658;48270037;48271357;48273239;48274596;48276499;48277300;48282583;48283052;48285116;48286970;48287799;48288817	48262972;48270156;48271551;48273296;48274679;48277037;48277503;48282665;48283162;48285214;48287076;48287902;48288885	-;-;-;-;-;-;-;-;-;-;-;-;-	2088	1085	1182	986	1321	1261	3059
CSbapl.2939	BAPLcs_chr1;BAPLcs_chr1	48289806;48292308	48289910;48292568	+;+	366	903	1221	779	3849	3404	4288
[truncated: 31,898 more rows]

## Sheet: genes with no expression
Genes which expression were not detected in the gonads of G. platifrons
Gene	Chr	Start	End	Strand	Length	F1	F2	F3	M1	M2	M3
CSbapl.34	BAPLcs_chr1	539214	540059	+	846	0	0	0	0	0	0
CSbapl.36	BAPLcs_chr1;BAPLcs_chr1;BAPLcs_chr1;BAPLcs_chr1;BAPLcs_chr1;BAPLcs_chr1;BAPLcs_chr1;BAPLcs_chr1	561132;561132;561132;564233;568007;568007;568007;613108	562228;562228;562228;564307;568226;568211;568227;613127	-;-;-;-;-;-;-;-	1413	485	417	373	465	470	402
CSbapl.37	BAPLcs_chr1;BAPLcs_chr1;BAPLcs_chr1;BAPLcs_chr1;BAPLcs_chr1;BAPLcs_chr1;BAPLcs_chr1;BAPLcs_chr1;BAPLcs_chr1;BAPLcs_chr1;BAPLcs_chr1;BAPLcs_chr1;BAPLcs_chr1;BAPLcs_chr1	613638;613638;629430;629430;635099;635099;636582;636597;638599;638599;639449;639449;651324;651324	613713;613713;629524;629524;635180;635180;636752;636752;638777;638777;639543;639543;651381;651381	+;+;+;+;+;+;+;+;+;+;+;+;+;+	756	2010	1837	1583	2882	4524	4620
CSbapl.41	BAPLcs_chr1	674215	674628	-	414	0	2	0	0	0	0
CSbapl.42	BAPLcs_chr1	675780	676802	-	1023	0	0	1	0	0	0
CSbapl.48	BAPLcs_chr1;BAPLcs_chr1;BAPLcs_chr1;BAPLcs_chr1;BAPLcs_chr1;BAPLcs_chr1;BAPLcs_chr1;BAPLcs_chr1;BAPLcs_chr1;BAPLcs_chr1;BAPLcs_chr1;BAPLcs_chr1;BAPLcs_chr1;BAPLcs_chr1;BAPLcs_chr1;BAPLcs_chr1;BAPLcs_chr1;BAPLcs_chr1;BAPLcs_chr1;BAPLcs_chr1;BAPLcs_chr1	734230;734230;734230;739262;739262;739262;740775;740775;740775;751673;751673;751673;767008;767008;767008;769079;769079;769079;780120;780120;780120	734301;734301;734301;739449;739449;739449;740954;740954;740954;751736;751736;751736;767111;767111;767111;769173;769173;769173;780196;780196;780196	+;+;+;+;+;+;+;+;+;+;+;+;+;+;+;+;+;+;+;+;+	780	76	123	79	224	218	182
[truncated: 38,156 more rows]

## Sheet: featureCounts
Featurecounts of the gonad genes of G. platifrons
[truncated: 38,174 more rows]

[truncated: 1 more sheets: all DEGs]
