# Supplementary material for: Gonad Transcriptome and Whole-Genome DNA Methylation Analyses Reveal Potential Sex Determination/Differentiation Mechanisms of the Deep-Sea Mussel Gigantidas platifrons
Source: Frontiers journal article supplement (doi:10.3389/fmars.2022.856291), 2022-04-28
Supplement: Table_2.XLSX [file Table_2.XLSX]

## Sheet: GO_CC
ID	Descrption	Pvalue	Qvalue	Up	Down	fg_num	bg_num
GO:0005856	cytoskeleton	5.16934e-33	6.6943e-30	122	368	490	1301
GO:0044430	cytoskeletal part	1.26138e-31	8.16742e-29	95	299	394	994
GO:0015630	microtubule cytoskeleton	3.20548e-25	1.3837e-22	62	273	335	860
GO:0005929	cilium	3.47857e-22	1.12619e-19	24	194	218	511
GO:0044441	ciliary part	1.32347e-17	3.42779e-15	14	146	160	367
GO:0005623	cell	5.53289e-16	1.02359e-13	1035	1514	2549	10125
GO:0044464	cell part	5.53289e-16	1.02359e-13	1035	1514	2549	10125
GO:0005622	intracellular	1.92816e-15	3.12121e-13	912	1399	2311	9046
GO:0043228	non-membrane-bounded organelle	3.16261e-15	4.09558e-13	273	601	874	3006
GO:0043232	intracellular non-membrane-bounded organelle	3.16261e-15	4.09558e-13	273	601	874	3006
GO:0005930	axoneme	5.2557e-15	6.18739e-13	2	67	69	122
GO:0005815	microtubule organizing center	6.1047e-15	6.58799e-13	32	178	210	550
GO:0043226	organelle	2.18162e-14	2.17323e-12	792	1268	2060	7962
GO:0031514	motile cilium	5.13035e-14	4.51874e-12	5	74	79	153
GO:0044424	intracellular part	5.23406e-14	4.51874e-12	907	1388	2295	9014
GO:0097014	ciliary plasm	5.86639e-13	4.60217e-11	2	67	69	131
GO:0005819	spindle	6.04146e-13	4.60217e-11	14	93	107	240
GO:0005813	centrosome	8.1287e-13	5.84815e-11	21	149	170	440
GO:0005875	microtubule associated complex	2.37159e-12	1.61643e-10	11	62	73	145
GO:0043229	intracellular organelle	2.55963e-12	1.65736e-10	783	1235	2018	7843
GO:0044450	microtubule organizing center part	2.70581e-12	1.66858e-10	1	69	70	137
GO:0000793	condensed chromosome	6.74845e-12	3.97238e-10	13	70	83	176
GO:0032838	cell projection cytoplasm	9.1551e-12	5.15472e-10	2	72	74	151
GO:0099512	supramolecular fiber	9.80416e-12	5.29016e-10	66	106	172	458
GO:0099513	polymeric cytoskeletal fiber	1.69858e-11	8.79867e-10	34	84	118	285
GO:0000922	spindle pole	1.97092e-11	9.81669e-10	6	54	60	114
GO:0000794	condensed nuclear chromosome	1.06069e-10	5.08739e-09	5	50	55	104
GO:0044463	cell projection part	1.30724e-10	5.9904e-09	66	217	283	860
GO:0042995	cell projection	1.34148e-10	5.9904e-09	141	339	480	1591
GO:0005814	centriole	1.76997e-10	7.64038e-09	0	52	52	97
GO:0000795	synaptonemal complex	3.53266e-09	1.47574e-07	0	24	24	33
GO:0099568	cytoplasmic region	8.47198e-09	3.42851e-07	45	107	152	425
GO:0015629	actin cytoskeleton	9.05133e-09	3.55196e-07	48	56	104	265
GO:0044447	axoneme part	2.30498e-08	8.77926e-07	1	31	32	54
GO:0000775	chromosome, centromeric region	8.24796e-08	3.05175e-06	10	50	60	135
GO:0036064	ciliary basal body	1.14401e-07	4.11526e-06	6	53	59	133
GO:0005874	microtubule	1.19308e-07	4.17579e-06	14	64	78	192
GO:0005737	cytoplasm	4.0623e-07	1.38439e-05	754	1113	1867	7388
GO:0044422	organelle part	1.31196e-06	4.35638e-05	565	979	1544	6040
GO:0044815	DNA packaging complex	4.99558e-06	0.000161732	7	19	26	48
GO:0051233	spindle midzone	5.75558e-06	0.000181792	4	20	24	43
GO:0043073	germ cell nucleus	6.33242e-06	0.000194342	3	17	20	33
GO:0000800	lateral element	6.45305e-06	0.000194342	0	13	13	17
GO:0036126	sperm flagellum	1.04833e-05	0.000305038	5	29	34	72
GO:0000779	condensed chromosome, centromeric region	1.05998e-05	0.000305038	5	23	28	55
GO:0005858	axonemal dynein complex	1.55167e-05	0.000436828	1	16	17	27
GO:0000778	condensed nuclear chromosome kinetochore	1.83766e-05	0.000506335	0	9	9	10
GO:0000780	condensed nuclear chromosome, centromeric region	2.10293e-05	0.000567352	0	12	12	16
GO:0097223	sperm part	2.19017e-05	0.000578831	13	41	54	136
GO:0002102	podosome	2.24668e-05	0.00058189	4	6	10	12
GO:0005884	actin filament	2.90437e-05	0.000737481	17	14	31	66
GO:0000801	central element	4.17314e-05	0.00102313	0	7	7	7
GO:0030496	midbody	4.18735e-05	0.00102313	7	39	46	113
GO:0005871	kinesin complex	8.41797e-05	0.00201875	3	19	22	43
GO:0005881	cytoplasmic microtubule	0.000104327	0.00245642	0	17	17	30
GO:0000776	kinetochore	0.000149153	0.00339973	6	35	41	102
GO:0072686	mitotic spindle	0.000150612	0.00339973	5	29	34	80
GO:0030286	dynein complex	0.000154891	0.00339973	3	22	25	53
GO:0030863	cortical cytoskeleton	0.000154891	0.00339973	8	17	25	53
GO:0044446	intracellular organelle part	0.00015787	0.00340737	544	927	1471	5843
GO:0030018	Z disc	0.000164242	0.00348677	23	16	39	96
GO:0008275	gamma-tubulin small complex	0.000176378	0.00368402	0	6	6	6
GO:0005634	nucleus	0.000180219	0.00370451	411	705	1116	4364
GO:0000777	condensed chromosome kinetochore	0.00021014	0.00425205	4	19	23	48
GO:0000786	nucleosome	0.000239396	0.00476951	7	12	19	37
GO:0072687	meiotic spindle	0.000251091	0.0049267	1	8	9	12
GO:0000930	gamma-tubulin complex	0.000497549	0.00961681	1	9	10	15
GO:0030864	cortical actin cytoskeleton	0.000530123	0.0100957	5	13	18	36
GO:0036156	inner dynein arm	0.000643849	0.0120838	1	8	9	13
GO:0000942	condensed nuclear chromosome outer kinetochore	0.00074527	0.0137875	0	5	5	5
GO:0008278	cohesin complex	0.000945805	0.017251	0	7	7	9
GO:0000242	pericentriolar material	0.000978817	0.0174604	0	15	15	29
GO:0097539	ciliary transition fiber	0.000984256	0.0174604	0	6	6	7
GO:0005721	pericentric heterochromatin	0.00104511	0.0182894	3	7	10	16
GO:0097546	ciliary base	0.0011453	0.0197756	0	17	17	35
GO:0044444	cytoplasmic part	0.00131836	0.0224641	655	946	1601	6451
GO:0031674	I band	0.00133744	0.0224933	23	16	39	105
GO:0010369	chromocenter	0.00142352	0.0233349	2	7	9	14
GO:0097228	sperm principal piece	0.00142352	0.0233349	1	8	9	14
GO:0043227	membrane-bounded organelle	0.00150442	0.0243529	723	1058	1781	7218
GO:0048471	perinuclear region of cytoplasm	0.00170001	0.0271792	67	83	150	512
GO:0005876	spindle microtubule	0.00173877	0.0274599	0	20	20	45
GO:0031233	intrinsic component of external side of plasma membrane	0.00199699	0.0308442	8	5	13	25
GO:0001673	male germ cell nucleus	0.00200071	0.0308442	0	10	10	17
GO:0030016	myofibril	0.00206904	0.0315224	32	22	54	159
GO:0000785	chromatin	0.0021745	0.0327439	41	84	125	420
GO:0036038	TCTN-B9D complex	0.00250559	0.0370548	0	7	7	10
GO:0043292	contractile fiber	0.00251801	0.0370548	35	24	59	178
GO:0044448	cell cortex part	0.00277917	0.0404385	18	24	42	119
GO:0000798	nuclear cohesin complex	0.00314276	0.0433725	0	6	6	8
GO:0001534	radial spoke	0.00314827	0.0433725	0	4	4	4
GO:0030893	meiotic cohesin complex	0.00314827	0.0433725	0	4	4	4
GO:0034991	nuclear meiotic cohesin complex	0.00314827	0.0433725	0	4	4	4
GO:1990716	axonemal central apparatus	0.00314827	0.0433725	0	4	4	4
GO:0030478	actin cap	0.00358973	0.0488916	1	4	5	6
GO:0030017	sarcomere	0.0036244	0.0488916	28	21	49	145

## Sheet: GO_MF
ID	Descrption	Pvalue	Qvalue	Up	Down	fg_num	bg_num
GO:0005515	protein binding	7.47938e-17	1.74494e-13	733	1103	1836	7400
GO:0032403	protein complex binding	1.1292e-15	1.31721e-12	58	138	196	534
GO:0015631	tubulin binding	3.79288e-15	2.9496e-12	15	101	116	270
GO:0008092	cytoskeletal protein binding	7.45048e-14	4.34549e-11	65	154	219	637
GO:0008017	microtubule binding	1.27518e-13	5.94999e-11	15	75	90	199
GO:0044877	macromolecular complex binding	1.00011e-12	3.88875e-10	130	246	376	1252
GO:0005488	binding	7.29109e-11	2.43001e-08	1289	1609	2898	12594
GO:0043168	anion binding	4.81702e-10	1.40476e-07	281	353	634	2371
GO:0036094	small molecule binding	1.04662e-09	2.52331e-07	290	343	633	2377
GO:0097367	carbohydrate derivative binding	1.08157e-09	2.52331e-07	231	302	533	1959
GO:0005200	structural constituent of cytoskeleton	1.31863e-09	2.7967e-07	18	22	40	74
GO:0000166	nucleotide binding	3.24013e-09	6.2883e-07	239	308	547	2031
GO:1901265	nucleoside phosphate binding	3.50398e-09	6.2883e-07	239	308	547	2032
GO:0003774	motor activity	3.80918e-09	6.34773e-07	14	42	56	123
GO:0003777	microtubule motor activity	1.18627e-08	1.84505e-06	6	37	43	87
GO:0017076	purine nucleotide binding	2.60852e-08	3.80355e-06	185	275	460	1695
GO:0032553	ribonucleotide binding	6.9754e-08	9.50787e-06	185	272	457	1695
GO:0019900	kinase binding	7.33569e-08	9.50787e-06	58	107	165	521
GO:0032555	purine ribonucleotide binding	8.56924e-08	1.05221e-05	183	270	453	1681
GO:0005509	calcium ion binding	9.39577e-08	1.09602e-05	104	109	213	708
GO:0030554	adenyl nucleotide binding	1.52297e-07	1.69195e-05	126	239	365	1324
GO:0032559	adenyl ribonucleotide binding	1.8386e-07	1.94975e-05	125	238	363	1318
GO:0001882	nucleoside binding	4.52167e-07	4.58655e-05	180	261	441	1653
GO:0001883	purine nucleoside binding	4.93095e-07	4.7933e-05	179	261	440	1650
GO:0032549	ribonucleoside binding	5.30431e-07	4.88533e-05	179	261	440	1651
GO:0031491	nucleosome binding	5.65695e-07	4.88533e-05	10	11	21	34
GO:0032550	purine ribonucleoside binding	5.78243e-07	4.88533e-05	178	261	439	1648
GO:0035639	purine ribonucleoside triphosphate binding	5.86324e-07	4.88533e-05	171	256	427	1598
GO:0003682	chromatin binding	1.07019e-06	8.60948e-05	49	86	135	426
GO:0005524	ATP binding	1.23004e-06	9.51623e-05	113	225	338	1238
GO:0003824	catalytic activity	1.26448e-06	9.51623e-05	861	894	1755	7466
GO:0008144	drug binding	1.49864e-06	0.000107228	170	257	427	1611
GO:0019901	protein kinase binding	1.51673e-06	0.000107228	52	91	143	459
GO:0031492	nucleosomal DNA binding	2.0247e-06	0.00013893	5	9	14	19
GO:0016301	kinase activity	3.15514e-06	0.000210312	63	139	202	696
GO:0016491	oxidoreductase activity	4.55528e-06	0.000295208	178	98	276	999
GO:0046873	metal ion transmembrane transporter activity	5.60534e-06	0.00035344	52	72	124	396
GO:0019887	protein kinase regulator activity	6.98892e-06	0.000421693	21	29	50	128
GO:0019207	kinase regulator activity	7.0493e-06	0.000421693	24	31	55	145
GO:0032027	myosin light chain binding	1.29048e-05	0.00075267	10	4	14	21
GO:0003779	actin binding	2.37556e-05	0.00135175	37	35	72	211
GO:0030234	enzyme regulator activity	6.78388e-05	0.00375474	100	99	199	716
GO:0016825	hydrolase activity, acting on acid phosphorus-nitrogen bonds	7.08138e-05	0.00375474	32	22	54	152
GO:0017171	serine hydrolase activity	7.08138e-05	0.00375474	32	22	54	152
GO:0043565	sequence-specific DNA binding	8.4859e-05	0.00439947	79	93	172	609
GO:0004672	protein kinase activity	9.68822e-05	0.00491361	46	101	147	510
GO:0045502	dynein binding	0.000185504	0.00915715	2	18	20	42
GO:0016773	phosphotransferase activity, alcohol group as acceptor	0.000188403	0.00915715	61	114	175	630
GO:0043167	ion binding	0.000218068	0.0103827	607	634	1241	5284
GO:0017111	nucleoside-triphosphatase activity	0.000236361	0.0110286	125	159	284	1085
GO:0008236	serine-type peptidase activity	0.000273668	0.0124666	27	22	49	141
GO:0004674	protein serine/threonine kinase activity	0.000277867	0.0124666	22	68	90	295
GO:0003680	AT DNA binding	0.000332104	0.0146188	1	8	9	13
GO:0019209	kinase activator activity	0.000351978	0.0152068	9	14	23	53
GO:0030295	protein kinase activator activity	0.000371328	0.0157511	9	13	22	50
GO:0016462	pyrophosphatase activity	0.000398575	0.0166049	127	165	292	1127
GO:0016790	thiolester hydrolase activity	0.000413838	0.016757	11	8	19	41
GO:0016817	hydrolase activity, acting on acid anhydrides	0.000423773	0.016757	127	165	292	1128
GO:0016818	hydrolase activity, acting on acid anhydrides, in phosphorus-containing anhydrides	0.000423773	0.016757	127	165	292	1128
GO:0004448	isocitrate dehydrogenase activity	0.000492161	0.0188231	1	4	5	5
GO:0043559	insulin binding	0.000492161	0.0188231	4	1	5	5
GO:0043015	gamma-tubulin binding	0.000527972	0.0198671	1	12	13	24
GO:0047555	3',5'-cyclic-GMP phosphodiesterase activity	0.0005513	0.0204156	0	7	7	9
GO:0008047	enzyme activator activity	0.000724137	0.0263971	33	56	89	299
GO:0016641	oxidoreductase activity, acting on the CH-NH2 group of donors, oxygen as acceptor	0.000749581	0.0269042	5	4	9	14
GO:0016620	oxidoreductase activity, acting on the aldehyde or oxo group of donors, NAD or NADP as acceptor	0.000798359	0.0274203	10	2	12	22
GO:0017022	myosin binding	0.000806284	0.0274203	16	16	32	86
GO:0051015	actin filament binding	0.000811713	0.0274203	17	17	34	93
GO:0001071	nucleic acid binding transcription factor activity	0.000822726	0.0274203	88	101	189	706
GO:0003700	transcription factor activity, sequence-specific DNA binding	0.000822726	0.0274203	88	101	189	706
GO:0045503	dynein light chain binding	0.000881364	0.0289609	1	12	13	25
GO:0048037	cofactor binding	0.000985862	0.0316092	115	57	172	638
GO:0003690	double-stranded DNA binding	0.000989057	0.0316092	60	85	145	527
GO:0005388	calcium-transporting ATPase activity	0.00101259	0.0319238	0	10	10	17
GO:0072509	divalent inorganic cation transmembrane transporter activity	0.00104879	0.0326245	15	36	51	156
GO:0005545	1-phosphatidylinositol binding	0.00106943	0.0328285	2	6	8	12
GO:0017048	Rho GTPase binding	0.00112889	0.0342039	11	22	33	91
GO:0098772	molecular function regulator	0.0012494	0.0373699	129	129	258	1002
GO:0008569	ATP-dependent microtubule motor activity, minus-end-directed	0.00143234	0.0422992	1	14	15	32
GO:0043539	protein serine/threonine kinase activator activity	0.0015116	0.0440821	4	5	9	15
GO:0008238	exopeptidase activity	0.0016022	0.0461473	17	20	37	107

## Sheet: GO_BP
ID	Descrption	Pvalue	Qvalue	Up	Down	fg_num	bg_num
GO:0007017	microtubule-based process	6.16892e-31	6.7815e-27	59	275	334	819
GO:0060271	cilium morphogenesis	2.58971e-26	1.30382e-22	14	157	171	350
GO:0007018	microtubule-based movement	3.55813e-26	1.30382e-22	17	131	148	286
GO:0044782	cilium organization	2.33781e-25	6.42489e-22	14	161	175	367
GO:0030031	cell projection assembly	2.17156e-23	4.77438e-20	41	183	224	529
GO:0001578	microtubule bundle formation	7.67145e-21	1.40554e-17	2	67	69	104
GO:0003341	cilium movement	6.65655e-19	1.04536e-15	4	63	67	105
GO:0000226	microtubule cytoskeleton organization	1.26408e-18	1.737e-15	37	202	239	619
GO:0042384	cilium assembly	1.92685e-18	2.35355e-15	3	74	77	131
GO:0000280	nuclear division	4.20481e-18	4.62234e-15	36	172	208	522
GO:0098813	nuclear chromosome segregation	4.67604e-18	4.67307e-15	17	116	133	288
GO:0070925	organelle assembly	1.47271e-17	1.34913e-14	41	248	289	800
GO:0007059	chromosome segregation	4.65104e-17	3.93299e-14	18	128	146	334
GO:0045132	meiotic chromosome segregation	8.58359e-17	6.15065e-14	6	59	65	107
GO:0030030	cell projection organization	8.81224e-17	6.15065e-14	150	319	469	1458
GO:0007010	cytoskeleton organization	8.95209e-17	6.15065e-14	115	287	402	1212
GO:0035082	axoneme assembly	3.53942e-16	2.16451e-13	2	50	52	78
GO:0048285	organelle fission	3.6245e-16	2.16451e-13	41	175	216	567
GO:0007126	meiotic nuclear division	3.74107e-16	2.16451e-13	8	103	111	235
GO:0032989	cellular component morphogenesis	3.50007e-15	1.92381e-12	143	324	467	1478
GO:1903046	meiotic cell cycle process	1.32709e-14	6.947e-12	10	110	120	272
GO:0000902	cell morphogenesis	1.86017e-14	9.29495e-12	134	295	429	1349
GO:0032990	cell part morphogenesis	2.87679e-14	1.37498e-11	101	261	362	1105
GO:0006996	organelle organization	3.41494e-14	1.56419e-11	290	671	961	3432
GO:0016043	cellular component organization	3.83196e-14	1.68499e-11	515	870	1385	5178
GO:0045143	homologous chromosome segregation	4.21987e-14	1.78419e-11	3	33	36	48
GO:0048858	cell projection morphogenesis	9.91336e-14	4.0362e-11	100	255	355	1088
GO:0051321	meiotic cell cycle	1.51188e-13	5.93575e-11	13	123	136	330
GO:0007129	synapsis	1.59419e-13	6.04307e-11	2	29	31	39
GO:0022414	reproductive process	1.63497e-12	5.99106e-10	203	386	589	1998
GO:0000003	reproduction	2.46982e-12	8.75829e-10	205	395	600	2045
GO:0071840	cellular component organization or biogenesis	2.72284e-12	9.35379e-10	542	873	1415	5364
GO:0010927	cellular component assembly involved in morphogenesis	2.92872e-12	9.7562e-10	27	108	135	338
GO:0022607	cellular component assembly	4.32944e-12	1.39981e-09	261	526	787	2790
GO:0007067	mitotic nuclear division	5.13121e-12	1.61164e-09	30	108	138	350
GO:1902589	single-organism organelle organization	6.38825e-12	1.95072e-09	203	542	745	2627
GO:0022402	cell cycle process	6.60027e-12	1.96099e-09	83	326	409	1321
GO:0001539	cilium or flagellum-dependent cell motility	1.31371e-11	3.70297e-09	5	55	60	115
GO:0060285	cilium-dependent cell motility	1.31371e-11	3.70297e-09	5	55	60	115
GO:0051302	regulation of cell division	1.38105e-11	3.79547e-09	16	95	111	267
GO:0070192	chromosome organization involved in meiotic cell cycle	1.60435e-11	4.30161e-09	2	45	47	81
GO:0048856	anatomical structure development	2.51073e-11	6.57153e-09	533	783	1316	4982
GO:0032502	developmental process	3.03389e-11	7.75617e-09	565	838	1403	5350
GO:0070193	synaptonemal complex organization	4.37395e-11	1.09279e-08	2	19	21	24
GO:0007127	meiosis I	4.51377e-11	1.10266e-08	6	64	70	146
GO:0007049	cell cycle	6.99694e-11	1.67212e-08	117	372	489	1648
GO:0007130	synaptonemal complex assembly	1.09268e-10	2.55571e-08	2	17	19	21
GO:0000819	sister chromatid segregation	1.40663e-10	3.22147e-08	11	76	87	200
GO:0044767	single-organism developmental process	2.46938e-10	5.53998e-08	555	813	1368	5236
GO:0032465	regulation of cytokinesis	2.78105e-10	6.11441e-08	5	37	42	73
GO:0044702	single organism reproductive process	4.71495e-10	1.0163e-07	179	323	502	1718
GO:0044085	cellular component biogenesis	7.35754e-10	1.55541e-07	302	532	834	3045
GO:0060294	cilium movement involved in cell motility	8.89437e-10	1.84483e-07	0	22	22	28
GO:0009653	anatomical structure morphogenesis	2.53865e-09	5.16804e-07	300	489	789	2880
GO:0000070	mitotic sister chromatid segregation	5.91037e-09	1.18132e-06	8	66	74	172
GO:0007131	reciprocal meiotic recombination	7.28627e-09	1.40523e-06	3	39	42	79
GO:0035825	reciprocal DNA recombination	7.28627e-09	1.40523e-06	3	39	42	79
GO:0044839	cell cycle G2/M phase transition	7.4973e-09	1.421e-06	12	64	76	179
GO:0048232	male gamete generation	8.05861e-09	1.5015e-06	38	138	176	517
GO:0030317	sperm motility	2.14773e-08	3.93499e-06	5	38	43	84
GO:0007098	centrosome cycle	2.30857e-08	4.09325e-06	6	63	69	161
GO:0051297	centrosome organization	2.30857e-08	4.09325e-06	6	63	69	161
GO:0000086	G2/M transition of mitotic cell cycle	3.73435e-08	6.51615e-06	10	62	72	172
GO:0046661	male sex differentiation	6.04298e-08	1.03798e-05	35	32	67	158
GO:0031023	microtubule organizing center organization	6.86279e-08	1.16066e-05	6	65	71	171
GO:0007283	spermatogenesis	7.8269e-08	1.30365e-05	38	123	161	478
GO:0044699	single-organism process	8.23404e-08	1.351e-05	1230	1526	2756	11421
GO:1902749	regulation of cell cycle G2/M phase transition	1.00561e-07	1.61025e-05	6	54	60	138
GO:0031109	microtubule polymerization or depolymerization	1.01851e-07	1.61025e-05	7	41	48	102
GO:0048869	cellular developmental process	1.02535e-07	1.61025e-05	375	593	968	3670
GO:0010389	regulation of G2/M transition of mitotic cell cycle	1.08492e-07	1.65647e-05	4	51	55	123
GO:0051304	chromosome separation	1.08492e-07	1.65647e-05	4	51	55	123
GO:0032886	regulation of microtubule-based process	1.32421e-07	1.99411e-05	12	74	86	222
GO:0032504	multicellular organism reproduction	1.41414e-07	2.10076e-05	143	298	441	1544
GO:0000281	mitotic cytokinesis	1.44612e-07	2.11963e-05	6	41	47	100
GO:0051726	regulation of cell cycle	2.03724e-07	2.94677e-05	75	252	327	1105
GO:1902850	microtubule cytoskeleton organization involved in mitosis	2.10469e-07	3.00478e-05	19	60	79	201
GO:0003006	developmental process involved in reproduction	2.23801e-07	3.15416e-05	150	260	410	1428
GO:0044703	multi-organism reproductive process	2.59099e-07	3.60541e-05	154	293	447	1575
GO:0007143	female meiotic division	2.83984e-07	3.90229e-05	1	29	30	54
GO:0055114	oxidation-reduction process	2.94675e-07	3.99922e-05	212	143	355	1217
GO:0051301	cell division	3.70841e-07	4.93243e-05	39	131	170	521
GO:0019953	sexual reproduction	3.72411e-07	4.93243e-05	134	265	399	1391
GO:0051298	centrosome duplication	5.04397e-07	6.60099e-05	2	37	39	80
GO:0009799	specification of symmetry	5.49659e-07	7.10871e-05	23	39	62	150
GO:0000910	cytokinesis	6.0076e-07	7.67925e-05	12	62	74	189
GO:0003351	epithelial cilium movement	6.13016e-07	7.74584e-05	1	21	22	35
GO:0070286	axonemal dynein complex assembly	6.3811e-07	7.9713e-05	2	17	19	28
GO:0007052	mitotic spindle organization	7.2786e-07	8.89449e-05	8	47	55	129
GO:0071822	protein complex subunit organization	7.28194e-07	8.89449e-05	167	310	477	1707
GO:0051983	regulation of chromosome segregation	9.79267e-07	0.000117926	8	47	55	130
GO:0007051	spindle organization	9.94662e-07	0.000117926	13	67	80	211
GO:0009855	determination of bilateral symmetry	9.97649e-07	0.000117926	22	39	61	149
GO:0044763	single-organism cellular process	1.28547e-06	0.000150332	1084	1411	2495	10291
GO:0048609	multicellular organismal reproductive process	1.42734e-06	0.000165165	140	284	424	1506
GO:0007088	regulation of mitotic nuclear division	1.51744e-06	0.000173763	9	54	63	157
GO:0007276	gamete generation	1.93249e-06	0.000219009	108	233	341	1184
GO:0008608	attachment of spindle microtubules to kinetochore	2.28519e-06	0.000256338	1	19	20	32
GO:0072350	tricarboxylic acid metabolic process	2.34828e-06	0.000260552	6	21	27	50
GO:0006858	extracellular transport	2.37016e-06	0.000260552	1	21	22	37
GO:0045023	G0 to G1 transition	2.42408e-06	0.000263841	4	13	17	25
GO:0051783	regulation of nuclear division	2.48179e-06	0.000267474	9	58	67	172
GO:0007368	determination of left/right symmetry	2.74457e-06	0.000292923	19	38	57	140
GO:0051306	mitotic sister chromatid separation	3.32285e-06	0.000351231	2	35	37	79
GO:0051640	organelle localization	3.85626e-06	0.000403732	44	143	187	602
GO:0051493	regulation of cytoskeleton organization	4.22996e-06	0.000438679	52	98	150	466
GO:0070317	negative regulation of G0 to G1 transition	4.46296e-06	0.000458517	4	10	14	19
GO:0044087	regulation of cellular component biogenesis	4.55197e-06	0.000463332	109	165	274	934
GO:0051026	chiasma assembly	5.04092e-06	0.000508393	0	11	11	13
GO:0030198	extracellular matrix organization	5.49365e-06	0.000549016	84	124	208	684
GO:0046785	microtubule polymerization	6.33642e-06	0.000627534	4	29	33	69
GO:0051258	protein polymerization	7.00218e-06	0.000687276	20	54	74	200
GO:0032501	multicellular organismal process	7.59352e-06	0.000738722	595	833	1428	5688
GO:0006323	DNA packaging	8.63978e-06	0.000833132	13	46	59	151
GO:0010564	regulation of cell cycle process	8.95451e-06	0.000855973	41	180	221	738
GO:0006928	movement of cell or subcellular component	9.12436e-06	0.000864691	169	292	461	1679
GO:0070316	regulation of G0 to G1 transition	9.26161e-06	0.000870196	4	11	15	22
GO:0051782	negative regulation of cell division	9.69057e-06	0.000902783	3	32	35	76
GO:0070507	regulation of microtubule cytoskeleton organization	1.04551e-05	0.000965827	8	58	66	175
GO:0007099	centriole replication	1.11311e-05	0.0010197	1	20	21	37
GO:0032467	positive regulation of cytokinesis	1.36773e-05	0.00123857	4	18	22	40
GO:0060322	head development	1.37456e-05	0.00123857	82	125	207	689
GO:0043062	extracellular structure organization	1.48094e-05	0.00132357	86	130	216	724
GO:0006334	nucleosome assembly	1.56413e-05	0.00138665	10	17	27	54
GO:0098534	centriole assembly	1.94507e-05	0.00169271	1	20	21	38
GO:0010965	regulation of mitotic sister chromatid separation	1.95929e-05	0.00169271	2	32	34	75
GO:0044784	metaphase/anaphase transition of cell cycle	1.95929e-05	0.00169271	2	32	34	75
GO:0006461	protein complex assembly	1.98636e-05	0.00169271	134	230	364	1304
GO:0070271	protein complex biogenesis	1.98636e-05	0.00169271	134	230	364	1304
GO:1903047	mitotic cell cycle process	2.21646e-05	0.00187427	55	210	265	917
GO:0030858	positive regulation of epithelial cell differentiation	2.31398e-05	0.0019418	9	8	17	28
GO:0007420	brain development	2.683e-05	0.00223441	76	119	195	650
GO:0007091	metaphase/anaphase transition of mitotic cell cycle	2.77157e-05	0.00229082	1	31	32	70
GO:0008584	male gonad development	2.97026e-05	0.00241867	20	22	42	101
GO:0046546	development of primary male sexual characteristics	2.97026e-05	0.00241867	20	22	42	101
GO:0044089	positive regulation of cellular component biogenesis	3.17797e-05	0.00256878	71	76	147	471
GO:0033045	regulation of sister chromatid segregation	3.73574e-05	0.00299759	7	36	43	105
GO:0006101	citrate metabolic process	3.78554e-05	0.00301554	3	19	22	42
GO:0061640	cytoskeleton-dependent cytokinesis	4.25182e-05	0.00336261	9	47	56	148
GO:0006333	chromatin assembly or disassembly	4.31239e-05	0.00338615	15	25	40	96
GO:0006734	NADH metabolic process	4.37528e-05	0.00339345	1	14	15	24
GO:0071539	protein localization to centrosome	4.38342e-05	0.00339345	0	17	17	29
GO:0007140	male meiosis	4.50187e-05	0.00343404	2	37	39	93
GO:0022406	membrane docking	4.52957e-05	0.00343404	2	50	52	135
GO:0030705	cytoskeleton-dependent intracellular transport	4.52957e-05	0.00343404	10	42	52	135
GO:0031497	chromatin assembly	5.42904e-05	0.00408777	11	22	33	75
GO:0061458	reproductive system development	5.51176e-05	0.00411969	74	72	146	472
GO:1902099	regulation of metaphase/anaphase transition of cell cycle	5.55697e-05	0.00411969	2	27	29	63
GO:0051303	establishment of chromosome localization	5.58385e-05	0.00411969	3	27	30	66
GO:0007020	microtubule nucleation	6.14577e-05	0.00450403	2	14	16	27
GO:0033047	regulation of mitotic sister chromatid segregation	6.26341e-05	0.00455985	4	34	38	91
GO:0051305	chromosome movement towards spindle pole	6.69064e-05	0.00483883	1	8	9	11
GO:2001234	negative regulation of apoptotic signaling pathway	7.68198e-05	0.00551948	20	31	51	134
GO:0022412	cellular process involved in reproduction in multicellular organism	7.87383e-05	0.00560663	84	199	283	1003
GO:0030071	regulation of mitotic metaphase/anaphase transition	7.90528e-05	0.00560663	1	27	28	61
GO:0000278	mitotic cell cycle	8.04138e-05	0.00566659	67	237	304	1086
GO:0051383	kinetochore organization	8.59081e-05	0.00601521	0	15	15	25
GO:0097435	fibril organization	8.70241e-05	0.00605479	53	106	159	525
GO:0007275	multicellular organism development	9.03663e-05	0.00624778	491	647	1138	4520
GO:0065004	protein-DNA complex assembly	9.46852e-05	0.00650547	17	37	54	145
GO:0007389	pattern specification process	0.000104926	0.00716429	100	125	225	780
GO:0050000	chromosome localization	0.00011003	0.00746639	3	27	30	68
GO:0051186	cofactor metabolic process	0.000134568	0.00903999	88	54	142	465
GO:0034728	nucleosome organization	0.000134864	0.00903999	15	28	43	110
GO:0071824	protein-DNA complex subunit organization	0.000136716	0.00907153	22	48	70	202
GO:0048608	reproductive structure development	0.0001381	0.00907153	74	69	143	469
GO:0030224	monocyte differentiation	0.000138635	0.00907153	4	7	11	16
GO:1903131	mononuclear cell differentiation	0.000138635	0.00907153	4	7	11	16
GO:0043933	macromolecular complex subunit organization	0.000140043	0.00910943	217	422	639	2450
GO:0051261	protein depolymerization	0.000155354	0.0100459	9	20	29	66
GO:0030953	astral microtubule organization	0.000175389	0.0111448	1	9	10	14
GO:0032954	regulation of cytokinetic process	0.000175389	0.0111448	0	10	10	14
GO:0046599	regulation of centriole replication	0.000175389	0.0111448	0	10	10	14
GO:0010824	regulation of centrosome duplication	0.000179844	0.0112973	0	19	19	37
GO:0051984	positive regulation of chromosome segregation	0.000179844	0.0112973	2	17	19	37
GO:0051225	spindle assembly	0.000187166	0.0116904	6	39	45	118
GO:0006099	tricarboxylic acid cycle	0.000195815	0.0121615	2	18	20	40
GO:0010970	establishment of localization by movement along microtubule	0.000201248	0.0123593	7	40	47	125
GO:1903037	regulation of leukocyte cell-cell adhesion	0.000201248	0.0123593	25	22	47	125
GO:0009913	epidermal cell differentiation	0.000210732	0.0127427	43	22	65	187
GO:0010457	centriole-centriole cohesion	0.000212127	0.0127427	1	8	9	12
GO:0051418	microtubule nucleation by microtubule organizing center	0.000212127	0.0127427	1	8	9	12
GO:0071285	cellular response to lithium ion	0.000212127	0.0127427	5	4	9	12
GO:0014074	response to purine-containing compound	0.000217145	0.0129206	21	25	46	122
GO:0051307	meiotic chromosome separation	0.00021744	0.0129206	3	19	22	46
GO:0000083	regulation of transcription involved in G1/S transition of mitotic cell cycle	0.00022785	0.0134267	0	12	12	19
GO:0006091	generation of precursor metabolites and energy	0.0002284	0.0134267	38	76	114	365
GO:0045144	meiotic sister chromatid segregation	0.000237809	0.0139055	0	8	8	10
GO:0007286	spermatid development	0.000273175	0.0158794	10	52	62	178
GO:0007548	sex differentiation	0.000274455	0.0158794	60	56	116	374
GO:0032945	negative regulation of mononuclear cell proliferation	0.000282138	0.0161539	5	10	15	27
GO:0050672	negative regulation of lymphocyte proliferation	0.000282138	0.0161539	5	10	15	27
GO:1901970	positive regulation of mitotic sister chromatid separation	0.000310247	0.0176712	0	11	11	17
GO:0046605	regulation of centrosome cycle	0.000321507	0.0181247	1	24	25	56
GO:0051310	metaphase plate congression	0.000321507	0.0181247	2	23	25	56
GO:0051656	establishment of organelle localization	0.000324516	0.0181871	38	101	139	462
GO:0030855	epithelial cell differentiation	0.000325922	0.0181871	109	86	195	677
GO:0003352	regulation of cilium movement	0.000331751	0.0184189	2	14	16	30
GO:0048515	spermatid differentiation	0.000345393	0.0190799	13	54	67	197
GO:0006790	sulfur compound metabolic process	0.00039283	0.0215919	72	37	109	351
GO:0044458	motile cilium assembly	0.000403894	0.0220896	0	14	14	25
GO:0044281	small molecule metabolic process	0.000425733	0.0231687	292	233	525	2005
GO:0045724	positive regulation of cilium assembly	0.000449379	0.0242158	1	11	12	20
GO:0071168	protein localization to chromatin	0.000449379	0.0242158	3	9	12	20
GO:0007062	sister chromatid cohesion	0.000456209	0.0244639	5	19	24	54
GO:0098840	protein transport along microtubule	0.000461315	0.0245457	1	22	23	51
GO:0042073	intraciliary transport	0.000462199	0.0245457	1	21	22	48
GO:0019752	carboxylic acid metabolic process	0.000475541	0.0251324	157	102	259	933
GO:0070664	negative regulation of leukocyte proliferation	0.000477819	0.0251324	5	10	15	28
GO:0030856	regulation of epithelial cell differentiation	0.00052207	0.0271996	16	13	29	70
GO:0051647	nucleus localization	0.00052207	0.0271996	6	23	29	70
GO:0051781	positive regulation of cell division	0.000529574	0.0274604	6	31	37	96
GO:0033043	regulation of organelle organization	0.0005368	0.0277029	107	223	330	1218
GO:0036159	inner dynein arm assembly	0.000546851	0.0277029	1	8	9	13
GO:0050872	white fat cell differentiation	0.000546851	0.0277029	5	4	9	13
GO:1901685	glutathione derivative metabolic process	0.000546851	0.0277029	9	0	9	13
GO:1901687	glutathione derivative biosynthetic process	0.000546851	0.0277029	9	0	9	13
GO:0048513	animal organ development	0.000558127	0.0281445	356	423	779	3061
GO:0050869	negative regulation of B cell activation	0.000630482	0.0315631	3	8	11	18
GO:0051128	regulation of cellular component organization	0.000631664	0.0315631	222	364	586	2264
GO:0022604	regulation of cell morphogenesis	0.000639575	0.0318138	57	81	138	465
GO:0009994	oocyte differentiation	0.000647958	0.0320856	27	45	72	219
GO:0051985	negative regulation of chromosome segregation	0.000660099	0.0325402	2	19	21	46
GO:0070341	fat cell proliferation	0.000672369	0.0327051	1	4	5	5
GO:0070344	regulation of fat cell proliferation	0.000672369	0.0327051	1	4	5	5
GO:0070345	negative regulation of fat cell proliferation	0.000672369	0.0327051	1	4	5	5
GO:0032875	regulation of DNA endoreduplication	0.00069355	0.0335868	3	5	8	11
GO:0048646	anatomical structure formation involved in morphogenesis	0.000730174	0.0352053	136	223	359	1340
GO:0050863	regulation of T cell activation	0.000756231	0.0363024	23	18	41	111
GO:0071800	podosome assembly	0.000827644	0.0390903	3	4	7	9
GO:0051231	spindle elongation	0.000827647	0.0390903	0	12	12	21
GO:0061064	negative regulation of nematode larval development	0.000827647	0.0390903	4	8	12	21
GO:0051784	negative regulation of nuclear division	0.000834796	0.0390903	2	23	25	59
GO:0090307	mitotic spindle assembly	0.000834796	0.0390903	6	19	25	59
GO:0010565	regulation of cellular ketone metabolic process	0.000835642	0.0390903	20	17	37	98
GO:0051591	response to cAMP	0.000848149	0.0395072	15	15	30	75
GO:0042129	regulation of T cell proliferation	0.000866786	0.0398865	12	12	24	56
GO:0007079	mitotic chromosome movement towards spindle pole	0.000874433	0.0398865	0	6	6	7
GO:0034085	establishment of sister chromatid cohesion	0.000874433	0.0398865	2	4	6	7
GO:0051012	microtubule sliding	0.000874433	0.0398865	0	6	6	7
GO:0071689	muscle thin filament assembly	0.000874433	0.0398865	3	3	6	7
GO:0033301	cell cycle comprising mitosis without cytokinesis	0.000879348	0.0399449	0	10	10	16
GO:1902100	negative regulation of metaphase/anaphase transition of cell cycle	0.000895058	0.0403253	1	16	17	35
GO:2001237	negative regulation of extrinsic apoptotic signaling pathway	0.000895058	0.0403253	9	14	23	53
GO:0009566	fertilization	0.000903469	0.0405358	14	32	46	129
GO:0007292	female gamete generation	0.000910448	0.0405358	78	127	205	729
GO:0051445	regulation of meiotic cell cycle	0.000918286	0.0405358	3	19	22	50
GO:0002433	immune response-regulating cell surface receptor signaling pathway involved in phagocytosis	0.000925543	0.0405358	11	7	18	38
GO:0007019	microtubule depolymerization	0.000925543	0.0405358	2	16	18	38
GO:0044380	protein localization to cytoskeleton	0.000925543	0.0405358	0	18	18	38
GO:0072698	protein localization to microtubule cytoskeleton	0.000925543	0.0405358	0	18	18	38
GO:0033046	negative regulation of sister chromatid segregation	0.000943072	0.0411396	1	19	20	44
GO:0043436	oxoacid metabolic process	0.000949881	0.0412729	173	113	286	1051
GO:0001709	cell fate determination	0.00100241	0.0433839	27	26	53	154
GO:0044272	sulfur compound biosynthetic process	0.00107021	0.0461365	40	16	56	165
GO:0060491	regulation of cell projection assembly	0.0011258	0.0483434	21	38	59	176
GO:1903053	regulation of extracellular matrix organization	0.00113078	0.0483682	42	49	91	293

## Sheet: TOP10 GO terms
All DEG top 10 BP,CC and MF GO enriched terms
class	ID	Descrption	Pvalue	Qvalue	Up	Down	fg_num	bg_num	per	ratio
Biological Process	GO:0007017	microtubule-based process	6.16892e-31	6.7815e-27	59	275	334	819	10.066	0.408
Biological Process	GO:0060271	cilium morphogenesis	2.58971e-26	1.30382e-22	14	157	171	350	5.154	0.489
Biological Process	GO:0007018	microtubule-based movement	3.55813e-26	1.30382e-22	17	131	148	286	4.461	0.517
Biological Process	GO:0044782	cilium organization	2.33781e-25	6.42489e-22	14	161	175	367	5.274	0.477
Biological Process	GO:0030031	cell projection assembly	2.17156e-23	4.77438e-20	41	183	224	529	6.751	0.423
Biological Process	GO:0001578	microtubule bundle formation	7.67145e-21	1.40554e-17	2	67	69	104	2.08	0.663
Biological Process	GO:0003341	cilium movement	6.65655e-19	1.04536e-15	4	63	67	105	2.019	0.638
Biological Process	GO:0000226	microtubule cytoskeleton organization	1.26408e-18	1.737e-15	37	202	239	619	7.203	0.386
Biological Process	GO:0042384	cilium assembly	1.92685e-18	2.35355e-15	3	74	77	131	2.321	0.588
Biological Process	GO:0000280	nuclear division	4.20481e-18	4.62234e-15	36	172	208	522	6.269	0.398
Cellular Component	GO:0005856	cytoskeleton	5.16934e-33	6.6943e-30	122	368	490	1301	16.361	0.377
Cellular Component	GO:0044430	cytoskeletal part	1.26138e-31	8.16742e-29	95	299	394	994	13.155	0.396
Cellular Component	GO:0015630	microtubule cytoskeleton	3.20548e-25	1.3837e-22	62	273	335	860	11.185	0.39
Cellular Component	GO:0005929	cilium	3.47857e-22	1.12619e-19	24	194	218	511	7.279	0.427
Cellular Component	GO:0044441	ciliary part	1.32347e-17	3.42779e-15	14	146	160	367	5.342	0.436
Cellular Component	GO:0005623	cell	5.53289e-16	1.02359e-13	1035	1514	2549	10125	85.109	0.252
Cellular Component	GO:0044464	cell part	5.53289e-16	1.02359e-13	1035	1514	2549	10125	85.109	0.252
Cellular Component	GO:0005622	intracellular	1.92816e-15	3.12121e-13	912	1399	2311	9046	77.162	0.255
Cellular Component	GO:0043228	non-membrane-bounded organelle	3.16261e-15	4.09558e-13	273	601	874	3006	29.182	0.291
Cellular Component	GO:0043232	intracellular non-membrane-bounded organelle	3.16261e-15	4.09558e-13	273	601	874	3006	29.182	0.291
Molecular Function	GO:0005515	protein binding	7.47938e-17	1.74494e-13	733	1103	1836	7400	49.117	0.248
Molecular Function	GO:0032403	protein complex binding	1.1292e-15	1.31721e-12	58	138	196	534	5.243	0.367
Molecular Function	GO:0015631	tubulin binding	3.79288e-15	2.9496e-12	15	101	116	270	3.103	0.43
Molecular Function	GO:0008092	cytoskeletal protein binding	7.45048e-14	4.34549e-11	65	154	219	637	5.859	0.344
Molecular Function	GO:0008017	microtubule binding	1.27518e-13	5.94999e-11	15	75	90	199	2.408	0.452
Molecular Function	GO:0044877	macromolecular complex binding	1.00011e-12	3.88875e-10	130	246	376	1252	10.059	0.3
Molecular Function	GO:0005488	binding	7.29109e-11	2.43001e-08	1289	1609	2898	12594	77.528	0.23
Molecular Function	GO:0043168	anion binding	4.81702e-10	1.40476e-07	281	353	634	2371	16.961	0.267
Molecular Function	GO:0036094	small molecule binding	1.04662e-09	2.52331e-07	290	343	633	2377	16.934	0.266
Molecular Function	GO:0097367	carbohydrate derivative binding	1.08157e-09	2.52331e-07	231	302	533	1959	14.259	0.272
Male-biased genes top 10 BP,CC and MF GO enriched terms.
class	ID	Descrption	Pvalue	Qvalue	fg_num	bg_num	per	ratio
Biological Process	GO:0007017	microtubule-based process	6.22e-58	5.44e-54	275	819	15.135	0.336
Biological Process	GO:0060271	cilium morphogenesis	2.74e-51	1.2e-47	157	350	8.641	0.449
Biological Process	GO:0044782	cilium organization	5.5e-51	1.6e-47	161	367	8.861	0.439
Biological Process	GO:0070925	organelle assembly	6.71e-45	1.47e-41	248	800	13.649	0.31
Biological Process	GO:0007018	microtubule-based movement	4.46e-44	7.8e-41	131	286	7.21	0.458
Biological Process	GO:0006996	organelle organization	3.5e-40	4.59e-37	671	3432	36.929	0.196
Biological Process	GO:0030031	cell projection assembly	3.68e-40	4.59e-37	183	529	10.072	0.346
Biological Process	GO:0000226	microtubule cytoskeleton organization	4.79e-40	5.24e-37	202	619	11.117	0.326
Biological Process	GO:1902589	single-organism organelle organization	1.54e-37	1.49e-34	542	2627	29.829	0.206
Biological Process	GO:0022402	cell cycle process	3.77e-36	3.29e-33	326	1321	17.942	0.247
Cellular Component	GO:0005856	cytoskeleton	3.74e-51	3.99e-48	368	1301	21.66	0.283
Cellular Component	GO:0015630	microtubule cytoskeleton	1.95e-47	1.04e-44	273	860	16.068	0.317
Cellular Component	GO:0044430	cytoskeletal part	9.16e-47	3.26e-44	299	994	17.599	0.301
Cellular Component	GO:0005929	cilium	4.09e-46	1.09e-43	194	511	11.418	0.38
Cellular Component	GO:0044441	ciliary part	2.17e-37	4.63e-35	146	367	8.593	0.398
Cellular Component	GO:0005815	microtubule organizing center	9.17e-32	1.63e-29	178	550	10.477	0.324
Cellular Component	GO:0043228	non-membrane-bounded organelle	2.42e-31	3.23e-29	601	3006	35.374	0.2
Cellular Component	GO:0043232	intracellular non-membrane-bounded organelle	2.42e-31	3.23e-29	601	3006	35.374	0.2
Cellular Component	GO:0005813	centrosome	5.39e-29	6.39e-27	149	440	8.77	0.339
Cellular Component	GO:0005622	intracellular	2.34e-28	2.5e-26	1399	9046	82.343	0.155
Molecular Function	GO:0005515	protein binding	1.32e-28	2.26e-25	1103	7400	54.685	0.149
Molecular Function	GO:0015631	tubulin binding	4.8e-28	4.1e-25	101	270	5.007	0.374
Molecular Function	GO:0008017	microtubule binding	2.29e-21	1.31e-18	75	199	3.718	0.377
Molecular Function	GO:0032403	protein complex binding	6.66e-20	2.84e-17	138	534	6.842	0.258
Molecular Function	GO:0008092	cytoskeletal protein binding	4.31e-19	1.47e-16	154	637	7.635	0.242
Molecular Function	GO:0044877	macromolecular complex binding	3.91e-17	1.11e-14	246	1252	12.196	0.196
Molecular Function	GO:0003777	microtubule motor activity	3.94e-13	9.6e-11	37	87	1.834	0.425
Molecular Function	GO:0005488	binding	1.67e-12	3.57e-10	1609	12594	79.772	0.128
Molecular Function	GO:0030554	adenyl nucleotide binding	2.08e-12	3.84e-10	239	1324	11.849	0.181
Molecular Function	GO:0032559	adenyl ribonucleotide binding	2.25e-12	3.84e-10	238	1318	11.8	0.181
Female-biased genes top 10 BP,CC and MF GO enriched terms.
class	ID	Descrption	Pvalue	Qvalue	fg_num	bg_num	per	ratio
Biological Process	GO:0055114	oxidation-reduction process	1.16e-14	9.96e-11	212	1217	14.124	0.174
Biological Process	GO:0044281	small molecule metabolic process	4.96e-10	1.47e-06	292	2005	19.454	0.146
Biological Process	GO:0043436	oxoacid metabolic process	5.12e-10	1.47e-06	173	1051	11.526	0.165
Biological Process	GO:0019752	carboxylic acid metabolic process	7.1e-10	1.53e-06	157	933	10.46	0.168
Biological Process	GO:0006082	organic acid metabolic process	1.35e-09	2.32e-06	173	1064	11.526	0.163
Biological Process	GO:0006790	sulfur compound metabolic process	1.61e-08	2.31e-05	72	351	4.797	0.205
Biological Process	GO:0051186	cofactor metabolic process	2.41e-08	2.97e-05	88	465	5.863	0.189
Biological Process	GO:0006631	fatty acid metabolic process	3.92e-08	4.22e-05	74	372	4.93	0.199
Biological Process	GO:0070613	regulation of protein processing	2.11e-07	0.000181694	30	105	1.999	0.286
Biological Process	GO:1903317	regulation of protein maturation	2.11e-07	0.000181694	30	105	1.999	0.286
Cellular Component	GO:0005576	extracellular region	2.79e-07	0.000252114	191	1325	14.738	0.144
Cellular Component	GO:0005615	extracellular space	4.75e-05	0.0160051	98	649	7.562	0.151
Cellular Component	GO:0015629	actin cytoskeleton	6.2e-05	0.0160051	48	265	3.704	0.181
Cellular Component	GO:0030018	Z disc	7.98e-05	0.0160051	23	96	1.775	0.24
Cellular Component	GO:0044421	extracellular region part	0.000100003	0.0160051	113	785	8.719	0.144
Cellular Component	GO:0043292	contractile fiber	0.000114324	0.0160051	35	178	2.701	0.197
Cellular Component	GO:0030016	myofibril	0.000140781	0.0160051	32	159	2.469	0.201
Cellular Component	GO:0005788	endoplasmic reticulum lumen	0.000160677	0.0160051	33	167	2.546	0.198
Cellular Component	GO:0005777	peroxisome	0.000177048	0.0160051	31	154	2.392	0.201
Cellular Component	GO:0042579	microbody	0.000177048	0.0160051	31	154	2.392	0.201
Molecular Function	GO:0016491	oxidoreductase activity	6.5e-15	1.13e-11	178	999	10.343	0.178
Molecular Function	GO:0048037	cofactor binding	2.62e-10	2.27e-07	115	638	6.682	0.18
Molecular Function	GO:0003824	catalytic activity	7.41e-09	4.29e-06	861	7466	50.029	0.115
Molecular Function	GO:0043028	cysteine-type endopeptidase regulator activity involved in apoptotic process	4.05e-07	0.000162484	25	84	1.453	0.298
Molecular Function	GO:0016614	oxidoreductase activity, acting on CH-OH group of donors	4.68e-07	0.000162484	41	181	2.382	0.227
Molecular Function	GO:0043027	cysteine-type endopeptidase inhibitor activity involved in apoptotic process	8.41e-07	0.000243459	23	76	1.336	0.303
Molecular Function	GO:0030414	peptidase inhibitor activity	1e-06	0.000247918	41	186	2.382	0.22
Molecular Function	GO:0004869	cysteine-type endopeptidase inhibitor activity	2.47e-06	0.000535098	24	86	1.395	0.279
Molecular Function	GO:0004364	glutathione transferase activity	3.66e-06	0.000597617	13	31	0.755	0.419
Molecular Function	GO:0061134	peptidase regulator activity	3.78e-06	0.000597617	43	209	2.499	0.206

## Sheet: KEGG
KEGG enrichment analysis
Pathway	Candidate genes with pathway annotation (1120)	All genes with pathway annotation (4670)	Pvalue	Qvalue	Pathway ID
Microbial metabolism in diverse environments	61 (5.45%)	132 (2.83%)	0	5e-06	ko01120
Carbon metabolism	41 (3.66%)	92 (1.97%)	1e-05	0.001835	ko01200
Glutathione metabolism	28 (2.5%)	57 (1.22%)	2.9e-05	0.003653	ko00480
Metabolism of xenobiotics by cytochrome P450	23 (2.05%)	45 (0.96%)	6.9e-05	0.006422	ko00980
Antigen processing and presentation	15 (1.34%)	25 (0.54%)	0.000124	0.008211	ko04612
Arginine and proline metabolism	27 (2.41%)	58 (1.24%)	0.000132	0.008211	ko00330
Glycolysis / Gluconeogenesis	25 (2.23%)	54 (1.16%)	0.000259	0.012307	ko00010
Biosynthesis of amino acids	26 (2.32%)	57 (1.22%)	0.000264	0.012307	ko01230
2-Oxocarboxylic acid metabolism	10 (0.89%)	15 (0.32%)	0.000544	0.022565	ko01210
Phagosome	39 (3.48%)	101 (2.16%)	0.000661	0.024668	ko04145
Pentose phosphate pathway	13 (1.16%)	23 (0.49%)	0.000792	0.026852	ko00030
Biosynthesis of secondary metabolites	116 (10.36%)	376 (8.05%)	0.000914	0.028403	ko01110
Ascorbate and aldarate metabolism	10 (0.89%)	16 (0.34%)	0.001141	0.032741	ko00053
Chemical carcinogenesis	24 (2.14%)	56 (1.2%)	0.001351	0.035993	ko05204
Citrate cycle (TCA cycle)	12 (1.07%)	22 (0.47%)	0.001916	0.047635	ko00020

## Sheet: WNT
Genes mapped to WNT signaling pathway
KO	Gene	KEGG annotation
K00445	CSbapl.23381	WNT6; wingless-type MMTV integration site family, member 6
K00572	CSbapl.46743	WNT7; wingless-type MMTV integration site family, member 7
K01357	CSbapl.23364	WNT10; wingless-type MMTV integration site family, member 10
K02085	CSbapl.19118	APC; adenomatosis polyposis coli protein
K02105	CSbapl.25374	CTNNB1; catenin beta 1
K02222	CSbapl.20855	SFRP5; secreted frizzled-related protein 5
K02222	CSbapl.20819	SFRP5; secreted frizzled-related protein 5
K03094	CSbapl.87977	SKP1, CBF3D; S-phase kinase-associated protein 1
K03213	CSbapl.91300	NKD; naked cuticle
K04348	CSbapl.80101	PPP3C, CNA; serine/threonine-protein phosphatase 2B catalytic subunit [EC:3.1.3.16]
K04392	CSbapl.5343	RAC1; Ras-related C3 botulinum toxin substrate 1
K04392	CSbapl.81477	RAC1; Ras-related C3 botulinum toxin substrate 1
K04392	CSbapl.81482	RAC1; Ras-related C3 botulinum toxin substrate 1
K04448	CSbapl.51037	JUN; transcription factor AP-1
K04448	CSbapl.50894	JUN; transcription factor AP-1
K04468	CSbapl.63917	NLK; nemo like kinase [EC:2.7.11.24]
K04498	CSbapl.32090	EP300, CREBBP, KAT3; E1A/CREB-binding protein [EC:2.3.1.48]
K04498	CSbapl.32129	EP300, CREBBP, KAT3; E1A/CREB-binding protein [EC:2.3.1.48]
K04498	CSbapl.82845	EP300, CREBBP, KAT3; E1A/CREB-binding protein [EC:2.3.1.48]
K04512	CSbapl.4673	DAAM; dishevelled associated activator of morphogenesis
K04512	CSbapl.4687	DAAM; dishevelled associated activator of morphogenesis
K08957	CSbapl.67270	CSNK1A; casein kinase 1, alpha [EC:2.7.11.1]
K19882	CSbapl.63274	NOTUM; O-palmitoleoyl-L-serine hydrolase [EC:3.1.1.98]
K19882	CSbapl.63289	NOTUM; O-palmitoleoyl-L-serine hydrolase [EC:3.1.1.98]
K23491	CSbapl.20103	CTNND2; catenin delta-2

## Sheet: Sex-related genes
Sex-related genes in deep-sea mussel G. platifrons
Category	Gene name	Gene annotation	Log2 (F VS M)	Q value
Transcriptional regulatory gene	CSbapl.9193	Ttranscription factor Dp-1	-1.6592	5.67e-05
	CSbapl.77468	Transmembrane protein 184A,B	-2.87363	3.51e-06
	CSbapl.79879	Transcription factor SOX9 (SOX group E)	2.40124	7.92312e-06
	CSbapl.21186	Transcription factor SOX5 (SOX group D)	2.13944	0.000219575
	CSbapl.50433	Transcription factor SOX4 (SOX group C)	1.07246	0.0202304
	CSbapl.2237	Transcription factor SOX2 (SOX group B1)	3.31108	4.14656e-09
	CSbapl.50300	Transcription factor AP-2 alpha/beta	8.11174	2.4e-18
	CSbapl.36568	TRA2	-1.40094	0.00225835
	CSbapl.67322	T-box transcription factor TBX20-like	4.67933	9.23e-06
	CSbapl.82472	TATA element modulatory factor	-2.41978	6.84e-12
	CSbapl.54982	Homeobox protein Nkx-2.3	1.03698	0.00572008
	CSbapl.84836	Homeobox protein DLX2	3.12641	1.46e-11
	CSbapl.41757	Forkhead box protein L	6.82406	1.61807e-42
	CSbapl.6028	F-box protein 11	-2.67143	2.34e-11
	CSbapl.49518	Doublesex-and mab-3-related transcription factor 2	-4.30256	2.15788e-15
	CSbapl.30732	DEAD-box ATP-dependent RNA helicase FANCM	-3.15625	0.00298471
	CSbapl.47974	Zinc finger Y-chromosomal protein 1-like	-1.68777	0.000107934
	CSbapl.88337	Zinc Finger E-Box Binding Homeobox 2	-2.11291	8.68e-06
	CSbapl.51414	Eyes absent homolog 4	1.25873	0.0316692
	CSbapl.64859	RUNX1	1.95304	0.000905513
	CSbapl.42244	Hairy and enhancer of split 1	3.41587	4.62e-11
	CSbapl.92424	Eukaryotic translation initiation factor 2 subunit 2-like	1.26018	0.00743998
	CSbapl.92058	Sal-like protein	1.7215	0.00344118
	CSbapl.12166	Dachshund homolog 2,Dachshund homolog 1	1.82977	1.82e-05
	CSbapl.51749	Pre-rRNA-processing protein IPI3	1.04555	0.0265718
	CSbapl.52193	Cohesin loading factor subunit SCC2, partial	-2.16929	1.4e-10
	CSbapl.37987	CCR4-NOT transcription complex subunit 9	-1.09481	0.00417333
	CSbapl.95676	CCAAT/enhancer-binding protein beta	2.37231	6.97e-05
	CSbapl.48863	Oligoadenylate synthase	1.4052	0.0139516
	CSbapl.60074	Polycomb group RING finger protein 6	-2.34836	0.00123085
	CSbapl.58064	Polycomb group RING finger protein 3	-2.04104	0.0025475
	CSbapl.68812	Periodic tryptophan protein 1	1.153	0.0103216
	CSbapl.41558	Nuclear receptor subfamily 0 group B member 1-like	1.74374	3.96e-05
	CSbapl.83193	Nuclear receptor coactivator 2	-1.80632	0.0155744
Steroid hormone biosynthesis related genes	CSbapl.17421	Cytochrome P450, family 12	3.03067	0.000129248
	CSbapl.19049	17-beta-hydroxysteroid dehydrogenase 12	4.59853	0.00105685
	CSbapl.19750	17-beta-hydroxysteroid dehydrogenase 14	2.35071	0.0356027
	CSbapl.28454	prostaglandin-endoperoxide synthase 2	2.21842	0.0150893
	CSbapl.34108	17-beta-estradiol 17-dehydrogenase	3.52291	0.00310556
	CSbapl.46751	17-beta-hydroxysteroid dehydrogenase 10	1.00368	0.0223312
	CSbapl.47353	Prostaglandin-H2 D-isomerase / glutathione transferase	3.08365	1.25877e-11
	CSbapl.48918	Prostaglandin reductase 1	3.8902	6.28121e-14
	CSbapl.52143	Prostaglandin E receptor 4	2.99366	0.00218521
	CSbapl.54889	Arginine vasopressin	3.23187	0.0105822
	CSbapl.59583	15-hydroxyprostaglandin dehydrogenase	3.63985	0.000366179
	CSbapl.66974	Androglobin	-2.40712	1.76689e-09
	CSbapl.74803	Prostaglandin E2 receptor EP2 subtype-like	5.88099	0.0328243
	CSbapl.82052	17-beta-hydroxysteroid dehydrogenase type 6-like	2.27265	0.00212979
	CSbapl.8954	Estrogen receptor	-1.99647	0.00816322
Ovary or oocyte specific genes	CSbapl.51296	Vitellogenin	7.98764	1.6057e-89
	CSbapl.74081	Vitelline membrane outer layer protein 1	4.80493	0.022367
	CSbapl.42847	Vitelline envelope zona pellucida domain protein 24	6.75678	5.1848e-20
	CSbapl.28936	Vitelline envelope zona pellucida domain protein 17	5.80275	7.34732e-23
	CSbapl.3788	Vitelline envelope zona pellucida domain protein 14	6.8091	1.19313e-19
	CSbapl.7358	Vitelline envelope zona pellucida domain 9, partial	8.49427	6.34346e-41
	CSbapl.33030	Vitelline envelope zona pellucida domain 6	3.83063	3.36985e-12
	CSbapl.33006	Vitelline envelope zona pellucida domain 14, partial	2.96829	5.39925e-14
Testis or sperm specific genes	CSbapl.33	Testis-specific serine kinase	-8.03653	6.68149e-39
	CSbapl.79395	Testis-expressed protein 47-like isoform X2	-2.3919	1.48818e-07
	CSbapl.60313	Testis-expressed protein 45	-5.84946	1.51526e-19
	CSbapl.59070	Testis-expressed protein 36 isoform X1	-5.35042	1.57759e-26
	CSbapl.80955	Testis-expressed protein 33 isoform X2	-4.07226	8.9074e-29
	CSbapl.10176	Testis-expressed protein 26-like isoform X1	-2.33831	1.02682e-07
	CSbapl.65892	Testis-expressed protein 11-like isoform X2	-3.46595	1.00132e-11
	CSbapl.65891	Testis-expressed protein 11-like isoform X1	-4.17135	3.8354e-17
	CSbapl.91538	Testis, prostate and placenta-expressed protein-like	-4.75208	1.30936e-17
	CSbapl.48873	Testicular receptor 4	-1.50605	0.00130132
	CSbapl.31426	Testicular haploid expressed gene protein-like isoform X5	-2.07256	0.00083157
	CSbapl.93407	Testicular haploid expressed gene protein isoform X2	-8.99387	4.74737e-11
	CSbapl.6780	T-complex-associated testis-expressed protein 1-like	-2.20968	6.52343e-11
	CSbapl.51452	Synaptonemal complex protein 2	-5.46036	3.77e-48
	CSbapl.63748	CYP17a	1.56288	0.00754402
	CSbapl.81291	Sperm-tail PG-rich repeat-containing protein 2	-2.99475	1.1289e-12
	CSbapl.55649	Spermine oxidase	-5.31526	1.8521e-26
	CSbapl.72161	Spermidine synthase	-3.13655	3.2155e-05
	CSbapl.22460	Spermatogenesis-associated serine-rich protein 2	-1.89225	0.000181961
	CSbapl.64803	Spermatogenesis-associated serine-rich protein 1-like isoform X11	-3.92385	2.69995e-21
	CSbapl.53268	spermatogenesis-associated protein 6-like isoform X1	-1.01091	0.0173558
	CSbapl.15191	Spermatogenesis-associated protein 4	-2.45511	6.0319e-13
	CSbapl.86851	Spermatogenesis-associated protein 22-like isoform X1	-5.21382	7.52619e-43
	CSbapl.13217	Spermatogenesis-associated protein 18	-1.7734	0.000939071
	CSbapl.8814	Spermatogenesis-associated protein 17-like isoform X1	-1.53256	3.10952e-05
	CSbapl.26111	Spermatogenesis- and oogenesis-specific basic helix-loop-helix-containing protein 2	4.15713	1.58e-09
	CSbapl.61030	Sperm-associated antigen 8	-2.11555	2.98416e-09
	CSbapl.35758	Sperm-associated antigen 6-like	-2.45966	1.06381e-09
	CSbapl.88247	Sperm-associated antigen 16 protein	-1.5985	0.000315913
	CSbapl.36858	Sperm-associated antigen 1	1.26203	0.0116018
	CSbapl.90643	Sperm surface protein Sp17	-3.7948	7.67113e-25
	CSbapl.50176	Sperm flagellar protein 2	-1.6505	0.000345226
	CSbapl.15796	Sperm axonemal maintenance protein CFAP97D1-like	-8.04863	3.72184e-38
	CSbapl.3217	Slit homolog 1 protei	-1.54377	0.000309971
	CSbapl.88325	SLC39A6	2.07401	1.4e-05
	CSbapl.22966	SERPINB	5.02794	0.00230442
	CSbapl.10980	Motile sperm domain-containing protein 2-like isoform X2	-3.48149	5.89768e-21
	CSbapl.12590	Male-specific lethal 3	-3.87891	9.2773e-24
	CSbapl.36456	Male-specific lethal 1	-1.74935	7.07246e-05
	CSbapl.63819	Peroxiredoxin (alkyl hydroperoxide reductase subunit C)	-1.22244	0.00380435
Gametogenesis related genes	CSbapl.59012	Meiotic recombination protein REC8L	-6.89166	5.07e-22
	CSbapl.82009	Meiotic recombination protein DMC1	-5.91133	2.44e-28
	CSbapl.80431	Cyclin-dependent kinase-like	-4.44601	2.85e-27
	CSbapl.92105	Cyclin E	-1.98481	3.21e-05
	CSbapl.80766	Checkpoint serine/threonine-protein kinase	-1.36434	0.00184773
	CSbapl.840	Vaccinia related kinase	-1.4603	0.000259311
	CSbapl.63810	Kinetochore protein NDC80	-2.12304	0.00246956
	CSbapl.74058	Protein Phosphatase, Mg2+/Mn2+ Dependent 1E	-2.5197	3.84e-07
Ser/thr phosphatase	CSbapl.80971	Serine/threonine-protein kinase SMG1-like	-1.78724	0.000157348
	CSbapl.62503	Serine/threonine-protein kinase mTOR	-1.19079	0.0160051
	CSbapl.82501	Serine/arginine repetitive matrix protein 2 isoform X3	1.4393	0.0164227
	CSbapl.100655	NASP	1.97994	0.000164479
Other genes involved in sex determination or sex differentiation pathway	CSbapl.12946	High mobility group protein B2	-1.38974	0.0139516
	CSbapl.15726	Kinesin family member 18/19	-3.70483	2.5e-23
	CSbapl.17095	Myoneurin-like	-3.19007	6.35e-05
	CSbapl.17921	Carbonyl reductase 1	3.45288	0.0322999
	CSbapl.20819	Secreted frizzled-related protein 5	4.11622	1.06e-07
	CSbapl.21260	Protein lin-9 homolog isoform X2	-1.35295	0.0021818
	CSbapl.21326	A disintegrin and metalloproteinase with thrombospondin motifs 16	2.86457	0.0297281
	CSbapl.22084	A disintegrin and metalloproteinase with thrombospondin motifs 2-like isoform X2	3.18558	0.00797582
	CSbapl.22386	Mucin-2-like	-2.11702	0.0280852
	CSbapl.24060	Metallo-pepetidase family M12B	4.1458	2.44e-07
	CSbapl.24206	Kalirin-like isoform X2	-1.98162	0.000225167
	CSbapl.24266	Low density lipoprotein-related protein 2	-2.51749	2.59e-05
	CSbapl.25160	Epidermal growth factor receptor	1.6479	0.00219011
	CSbapl.25374	Beta-catenin protein	1.21787	0.0215732
	CSbapl.26840	RAC1	3.68241	0.0437251
	CSbapl.28483	Abnormal spindle-like microcephaly-associated protein	-4.06551	1.97e-15
	CSbapl.2871	Nitric oxide synthase	-4.33538	0.0212897
	CSbapl.2957	Cytosolic phospholipase A2	1.73395	0.00136871
	CSbapl.33470	Pumilio	-1.36172	0.00308092
	CSbapl.36159	A-kinase anchor protein 9	-2.62946	3.51e-16
	CSbapl.36349	Partitioning defective protein 3	-1.38518	0.000113488
	CSbapl.37624	Bcl2 protein	-1.70765	2.1e-05
	CSbapl.37816	Integrin Subunit Beta 1	1.03585	0.0296905
	CSbapl.4010	Bone morphogenetic protein 2/4	1.91581	0.0100855
	CSbapl.43169	Nudix Hydrolase 1	-6.80972	0.000247673
	CSbapl.46743	Wnt family member 7	2.67899	0.00283387
	CSbapl.46900	Filamin-like protein-1	1.28727	0.00238197
	CSbapl.48626	DNA excision repair protein ERCC-1-like isoform X1	1.29153	0.0136602
	CSbapl.51134	Niemann–Pick type C 1	-2.97144	0.00416318
	CSbapl.51891	protein TilB	-1.57342	2.37e-05
	CSbapl.52260	Kelch-like protein 10	-7.84963	3.28e-50
	CSbapl.52673	DNA-binding protein inhibitor ID2	1.75352	4.59e-06
	CSbapl.5439	Protein dpy-30	-1.01657	0.0286274
	CSbapl.56912	Histone-lysine N-methyltransferase NSD2-like isoform X2	-2.29429	1.26e-10
	CSbapl.61242	Regulator of nonsense transcripts 1-like	-1.01739	0.0234585
	CSbapl.65848	Glutathione S-transferase	2.22774	0.000291724
	CSbapl.69904	MutS protein homolog 4	-3.47336	5.07e-16
	CSbapl.7276	Nanos 1	3.30875	6.30863e-05
	CSbapl.73718	BRCA1 Interacting Helicase 1	-1.13082	0.00988273
	CSbapl.7703	Niemann–Pick type C 2	7.18791	1.15766e-36
	CSbapl.80485	Netrin 1, partial	3.45684	5.04e-05
	CSbapl.81297	Netrin receptor unc-5	1.9019	0.000150266
	CSbapl.81477	Rho-related protein rac	1.69054	0.00937014
	CSbapl.82329	Caspase 2	-5.34067	0.000780008
	CSbapl.84855	Distal-Less Homeobox 2	2.28991	1.93e-05
	CSbapl.85538	Angiotensin I-converting enzyme	-1.52352	0.0416596
	CSbapl.86966	Ras GTPase-activating protein 1	-1.18249	0.0316854
	CSbapl.90691	Roundabout, axon guidance receptor 1	1.7231	0.0012986
	CSbapl.93775	FA Complementation Group A	-1.47412	0.0068849
	CSbapl.95057	Actin-binding protein anillin	-3.26804	8.65e-22
	CSbapl.95345	Glutathione S-transferase	2.19412	1.54e-06
	CSbapl.98266	Calpain-5-like isoform X2	1.98756	0.0210176
