# Supplementary material for: Gonad Transcriptome and Whole-Genome DNA Methylation Analyses Reveal Potential Sex Determination/Differentiation Mechanisms of the Deep-Sea Mussel Gigantidas platifrons
Source: Frontiers journal article supplement (doi:10.3389/fmars.2022.856291), 2022-04-28
Supplement: Table_3.XLSX [file Table_3.XLSX]

## Sheet: othogroups
Orthogroup	Gigantidas platifrons	Limnoperna fortunei
OG0000032	CSbapl.42948, CSbapl.29239, CSbapl.10495, CSbapl.15006, CSbapl.34187, CSbapl.65091, CSbapl.30432, CSbapl.10736, CSbapl.10746, CSbapl.22757, CSbapl.41999, CSbapl.56980, CSbapl.62305, CSbapl.1400, CSbapl.71595	itr6_1489_pi.g2664_itr6_1489_pi.g2664.t1
OG0000035	CSbapl.45502	itr6_1839_pi.g2870_itr6_1839_pi.g2870.t1.2.57f6923d, itr6_1839_pi.g2870_itr6_1839_pi.g2870.t1.4.57f6923d, itr6_1839_pi.g2870_itr6_1839_pi.g2870.t1, itr6_1839_pi.g2870_itr6_1839_pi.g2870.t1.1.57f6923d, itr6_1839_pi.g2870_itr6_1839_pi.g2870.t1.5.57f6923d, itr6_1839_pi.g2870_itr6_1839_pi.g2870.t1.2.57f6923d.12.57f6f331, itr6_1839_pi.g2870_itr6_1839_pi.g2870.t1.13.57f6923d, itr6_1839_pi.g2870_itr6_18…
OG0000049	CSbapl.28217	itr6_15928_p.g150_itr6_15928_p.g150.t1, itr6_2379_pi.g1474_itr6_2379_pi.g1474.t1, itr6_17087_p.g57_itr6_17087_p.g57.t1, itr6_15947_p.g165_itr6_15947_p.g165.t1, itr6_17087_p.g58_itr6_17087_p.g58.t1
OG0000049	CSbapl.94037, CSbapl.94038	itr6_19_pilo.g355_itr6_19_pilo.g355.t1, itr6_15928_p.g147_itr6_15928_p.g147.t1, itr6_3251_pi.g341_itr6_3251_pi.g341.t1, itr6_19_pilo.g356_itr6_19_pilo.g356.t1, itr6_1167_pi.g2564_itr6_1167_pi.g2564.t1
OG0000057	CSbapl.34148, CSbapl.34125, CSbapl.100809, CSbapl.34135, CSbapl.34126, CSbapl.34140, CSbapl.31864, CSbapl.32983, CSbapl.34121, CSbapl.101314	itr6_3201_pi.g2874_itr6_3201_pi.g2874.t1, itr6_18452_p.g95_itr6_18452_p.g95.t1
OG0000059	CSbapl.2947, CSbapl.19167, CSbapl.94853, CSbapl.95804, CSbapl.12006, CSbapl.49731, CSbapl.17822, CSbapl.73788, CSbapl.64770, CSbapl.26651, CSbapl.73785	itr6_3448_pi.g1968_itr6_3448_pi.g1968.t1
OG0000060	CSbapl.53578, CSbapl.54478, CSbapl.68611, CSbapl.12116, CSbapl.68613, CSbapl.12073, CSbapl.54481, CSbapl.54485, CSbapl.53583, CSbapl.53585, CSbapl.54473	itr6_2605_pi.g353_itr6_2605_pi.g353.t1
OG0000062	CSbapl.14102	itr6_2007_pi.g1124_itr6_2007_pi.g1124.t1.1.57f6923d.2.57f6f331, itr6_2007_pi.g1124_itr6_2007_pi.g1124.t1.7.57f6923d, itr6_2007_pi.g1124_itr6_2007_pi.g1124.t1.3.57f6923d, itr6_2007_pi.g1124_itr6_2007_pi.g1124.t1.5.57f6923d, itr6_2007_pi.g1124_itr6_2007_pi.g1124.t1.4.57f6923d, itr6_2007_pi.g1124_itr6_2007_pi.g1124.t1.8.57f6923d, itr6_2007_pi.g1124_itr6_2007_pi.g1124.t1, itr6_2007_pi.g1124_itr6_2007…
OG0000064	CSbapl.19110	itr6_1631_pi.g312_itr6_1631_pi.g312.t1.7.57f6923c, itr6_1631_pi.g312_itr6_1631_pi.g312.t1.10.57f6923c, itr6_1631_pi.g312_itr6_1631_pi.g312.t1.9.57f6923c, itr6_1631_pi.g312_itr6_1631_pi.g312.t1.6.57f6923c, itr6_1631_pi.g312_itr6_1631_pi.g312.t1, itr6_1631_pi.g312_itr6_1631_pi.g312.t1.5.57f6923c, itr6_1631_pi.g312_itr6_1631_pi.g312.t1.1.57f6923c, itr6_1631_pi.g312_itr6_1631_pi.g312.t1.8.57f6923c, i…
OG0000065	CSbapl.21269	itr6_16117_p.g41_itr6_16117_p.g41.t1, itr6_17850_p.g113_itr6_17850_p.g113.t1, itr6_3142_pi.g2443_itr6_3142_pi.g2443.t1, itr6_13398_p.g168_itr6_13398_p.g168.t1, itr6_11791_p.g145_itr6_11791_p.g145.t1, itr6_15433_p.g13_itr6_15433_p.g13.t1, itr6_2692_pi.g1341_itr6_2692_pi.g1341.t1, itr6_3927_pi.g552_itr6_3927_pi.g552.t1, itr6_10810_p.g168_itr6_10810_p.g168.t1, itr6_19491_p.g108_itr6_19491_p.g108.t1,…
OG0000066	CSbapl.38288	itr6_10045_p.g78_itr6_10045_p.g78.t1, itr6_11264_p.g28_itr6_11264_p.g28.t1, itr6_391_pil.g983_itr6_391_pil.g983.t1, itr6_10491_p.g171_itr6_10491_p.g171.t1, itr6_3481_pi.g2218_itr6_3481_pi.g2218.t1, itr6_5804_pi.g83_itr6_5804_pi.g83.t1, itr6_2297_pi.g567_itr6_2297_pi.g567.t1, itr6_2004_pi.g1057_itr6_2004_pi.g1057.t1, itr6_359_pil.g493_itr6_359_pil.g493.t1, itr6_1432_pi.g1839_itr6_1432_pi.g1839.t1,…
OG0000067	CSbapl.50773	itr6_3064_pi.g1790_itr6_3064_pi.g1790.t1.10.57f6923e, itr6_3064_pi.g1790_itr6_3064_pi.g1790.t1.1.57f6923e, itr6_3064_pi.g1790_itr6_3064_pi.g1790.t1.2.57f6923e, itr6_3064_pi.g1790_itr6_3064_pi.g1790.t1.8.57f6923e, itr6_3064_pi.g1790_itr6_3064_pi.g1790.t1.3.57f6923e, itr6_3064_pi.g1790_itr6_3064_pi.g1790.t1.7.57f6923e, itr6_3064_pi.g1790_itr6_3064_pi.g1790.t1.5.57f6923e, itr6_3064_pi.g1790_itr6_306…
OG0000068	CSbapl.51971	itr6_2899_pi.g126_itr6_2899_pi.g126.t1.4.57f6923e, itr6_2899_pi.g126_itr6_2899_pi.g126.t1, itr6_2899_pi.g126_itr6_2899_pi.g126.t1.3.57f6923e, itr6_2899_pi.g126_itr6_2899_pi.g126.t1.1.57f6923e, itr6_2899_pi.g126_itr6_2899_pi.g126.t1.2.57f6923e, itr6_2899_pi.g126_itr6_2899_pi.g126.t1.10.57f6923e, itr6_2899_pi.g126_itr6_2899_pi.g126.t1.6.57f6923e, itr6_2899_pi.g126_itr6_2899_pi.g126.t1.8.57f6923e, i…
OG0000070	CSbapl.90403	itr6_10655_p.g38_itr6_10655_p.g38.t1.6.57f6923b, itr6_10655_p.g38_itr6_10655_p.g38.t1.8.57f6923b, itr6_10655_p.g38_itr6_10655_p.g38.t1.4.57f6923b, itr6_10655_p.g38_itr6_10655_p.g38.t1.5.57f6923b, itr6_10655_p.g38_itr6_10655_p.g38.t1.1.57f6923b, itr6_10655_p.g38_itr6_10655_p.g38.t1, itr6_10655_p.g38_itr6_10655_p.g38.t1.3.57f6923b, itr6_10655_p.g38_itr6_10655_p.g38.t1.10.57f6923b, itr6_10655_p.g38_…
OG0000078	CSbapl.26685	itr6_1309_pi.g204_itr6_1309_pi.g204.t1.7.57f6923b.1.57f6f32f, itr6_1309_pi.g204_itr6_1309_pi.g204.t1.7.57f6923b, itr6_1309_pi.g204_itr6_1309_pi.g204.t1.6.57f6923b, itr6_1309_pi.g204_itr6_1309_pi.g204.t1.4.57f6923b, itr6_1309_pi.g204_itr6_1309_pi.g204.t1.2.57f6923b, itr6_1309_pi.g204_itr6_1309_pi.g204.t1.3.57f6923b, itr6_1309_pi.g204_itr6_1309_pi.g204.t1.5.57f6923b, itr6_1309_pi.g204_itr6_1309_pi.…
OG0000082	CSbapl.54349	itr6_2431_pi.g1924_itr6_2431_pi.g1924.t1.3.57f6923d, itr6_2431_pi.g1924_itr6_2431_pi.g1924.t1, itr6_2431_pi.g1924_itr6_2431_pi.g1924.t1.2.57f6923d, itr6_2431_pi.g1924_itr6_2431_pi.g1924.t1.1.57f6923d
OG0000082	CSbapl.53610, CSbapl.54368	itr6_2708_pi.g1505_itr6_2708_pi.g1505.t1.1.57f6923e, itr6_2708_pi.g1505_itr6_2708_pi.g1505.t1.3.57f6923e, itr6_2708_pi.g1505_itr6_2708_pi.g1505.t1, itr6_2708_pi.g1505_itr6_2708_pi.g1505.t1.2.57f6923e
OG0000086	CSbapl.95243	itr6_1437_pi.g1970_itr6_1437_pi.g1970.t1.3.57f6923c.5.57f6f330, itr6_1437_pi.g1970_itr6_1437_pi.g1970.t1.3.57f6923c.1.57f6f330, itr6_1437_pi.g1970_itr6_1437_pi.g1970.t1.3.57f6923c.3.57f6f330, itr6_1437_pi.g1970_itr6_1437_pi.g1970.t1.3.57f6923c.4.57f6f330, itr6_1437_pi.g1970_itr6_1437_pi.g1970.t1.3.57f6923c.2.57f6f330, itr6_1437_pi.g1970_itr6_1437_pi.g1970.t1.1.57f6923c, itr6_1437_pi.g1970_itr6_14…
OG0000087	CSbapl.98109, CSbapl.98080	itr6_32_pilo.g494_itr6_32_pilo.g494.t1.5.57f6923f, itr6_32_pilo.g494_itr6_32_pilo.g494.t1.3.57f6923f, itr6_32_pilo.g494_itr6_32_pilo.g494.t1, itr6_32_pilo.g494_itr6_32_pilo.g494.t1.2.57f6923f, itr6_32_pilo.g494_itr6_32_pilo.g494.t1.7.57f6923f, itr6_32_pilo.g494_itr6_32_pilo.g494.t1.8.57f6923f, itr6_32_pilo.g494_itr6_32_pilo.g494.t1.6.57f6923f, itr6_32_pilo.g494_itr6_32_pilo.g494.t1.1.57f6923f, it…
OG0000094	CSbapl.35711, CSbapl.32056, CSbapl.23435, CSbapl.12066, CSbapl.58096, CSbapl.30451, CSbapl.10054, CSbapl.22372, CSbapl.25349	itr6_5037_pi.g1103_itr6_5037_pi.g1103.t1
OG0000106	CSbapl.3994	itr6_5881_pi.g281_itr6_5881_pi.g281.t1.3.57f69241, itr6_5881_pi.g281_itr6_5881_pi.g281.t1, itr6_5881_pi.g281_itr6_5881_pi.g281.t1.7.57f69241, itr6_5881_pi.g281_itr6_5881_pi.g281.t1.2.57f69241, itr6_5881_pi.g281_itr6_5881_pi.g281.t1.5.57f69241, itr6_5881_pi.g281_itr6_5881_pi.g281.t1.4.57f69241, itr6_5881_pi.g281_itr6_5881_pi.g281.t1.6.57f69241, itr6_5881_pi.g281_itr6_5881_pi.g281.t1.1.57f69241, it…
OG0000107	CSbapl.54574	itr6_1167_pi.g2581_itr6_1167_pi.g2581.t1.6.57f6923b, itr6_1167_pi.g2581_itr6_1167_pi.g2581.t1.4.57f6923b, itr6_1167_pi.g2581_itr6_1167_pi.g2581.t1.3.57f6923b, itr6_1167_pi.g2581_itr6_1167_pi.g2581.t1.2.57f6923b, itr6_1167_pi.g2581_itr6_1167_pi.g2581.t1.5.57f6923b, itr6_1167_pi.g2581_itr6_1167_pi.g2581.t1, itr6_1167_pi.g2581_itr6_1167_pi.g2581.t1.1.57f6923b, itr6_1167_pi.g2581_itr6_1167_pi.g2581.t…
OG0000108	CSbapl.60808	itr6_12_pilo.g256_itr6_12_pilo.g256.t1.2.57f6923b, itr6_12_pilo.g256_itr6_12_pilo.g256.t1.4.57f6923b, itr6_12_pilo.g256_itr6_12_pilo.g256.t1.3.57f6923b, itr6_12_pilo.g256_itr6_12_pilo.g256.t1.5.57f6923b, itr6_12_pilo.g256_itr6_12_pilo.g256.t1, itr6_12_pilo.g256_itr6_12_pilo.g256.t1.1.57f6923b, itr6_12_pilo.g256_itr6_12_pilo.g256.t1.7.57f6923b, itr6_12_pilo.g256_itr6_12_pilo.g256.t1.8.57f6923b, it…
OG0000122	CSbapl.24988, CSbapl.41625, CSbapl.13749, CSbapl.74736, CSbapl.22257, CSbapl.13721	itr6_9042_pi.g38_itr6_9042_pi.g38.t1.1.57f69242, itr6_9042_pi.g38_itr6_9042_pi.g38.t1.2.57f69242, itr6_9042_pi.g38_itr6_9042_pi.g38.t1
OG0000128	CSbapl.17533	itr6_356_pil.g390_itr6_356_pil.g390.t1.1.57f6923f, itr6_356_pil.g390_itr6_356_pil.g390.t1.4.57f6923f.1.57f6f333, itr6_356_pil.g390_itr6_356_pil.g390.t1.4.57f6923f.3.57f6f333, itr6_356_pil.g390_itr6_356_pil.g390.t1.4.57f6923f.2.57f6f333, itr6_356_pil.g390_itr6_356_pil.g390.t1.4.57f6923f, itr6_356_pil.g390_itr6_356_pil.g390.t1, itr6_356_pil.g390_itr6_356_pil.g390.t1.3.57f6923f, itr6_356_pil.g390_it…
OG0000130	CSbapl.22316, CSbapl.22313, CSbapl.22305, CSbapl.22318, CSbapl.24848, CSbapl.46980, CSbapl.47613	itr6_7708_pi.g4_itr6_7708_pi.g4.t1.1.57f69242, itr6_7708_pi.g4_itr6_7708_pi.g4.t1
OG0000131	CSbapl.24936	itr6_3713_pi.g1425_itr6_3713_pi.g1425.t1.5.57f6923f, itr6_3713_pi.g1425_itr6_3713_pi.g1425.t1.6.57f6923f, itr6_3713_pi.g1425_itr6_3713_pi.g1425.t1.7.57f6923f, itr6_3713_pi.g1425_itr6_3713_pi.g1425.t1.4.57f6923f, itr6_3713_pi.g1425_itr6_3713_pi.g1425.t1.2.57f6923f, itr6_3713_pi.g1425_itr6_3713_pi.g1425.t1.1.57f6923f, itr6_3713_pi.g1425_itr6_3713_pi.g1425.t1, itr6_3713_pi.g1425_itr6_3713_pi.g1425.t…
OG0000134	CSbapl.46481	itr6_821_pil.g2574_itr6_821_pil.g2574.t1.2.57f69242.1.57f6f336, itr6_821_pil.g2574_itr6_821_pil.g2574.t1.2.57f69242, itr6_821_pil.g2574_itr6_821_pil.g2574.t1.4.57f69242, itr6_821_pil.g2574_itr6_821_pil.g2574.t1, itr6_821_pil.g2574_itr6_821_pil.g2574.t1.1.57f69242, itr6_821_pil.g2574_itr6_821_pil.g2574.t1.3.57f69242, itr6_821_pil.g2574_itr6_821_pil.g2574.t1.5.57f69242, itr6_821_pil.g2574_itr6_821_…
OG0000135	CSbapl.48957	itr6_2871_pi.g3060_itr6_2871_pi.g3060.t1.7.57f6923e, itr6_2871_pi.g3060_itr6_2871_pi.g3060.t1.4.57f6923e, itr6_2871_pi.g3060_itr6_2871_pi.g3060.t1.6.57f6923e, itr6_2871_pi.g3060_itr6_2871_pi.g3060.t1.3.57f6923e, itr6_2871_pi.g3060_itr6_2871_pi.g3060.t1.1.57f6923e, itr6_2871_pi.g3060_itr6_2871_pi.g3060.t1.5.57f6923e, itr6_2871_pi.g3060_itr6_2871_pi.g3060.t1.2.57f6923e, itr6_2871_pi.g3060_itr6_2871…
OG0000136	CSbapl.54845	itr6_11269_p.g32_itr6_11269_p.g32.t1, itr6_781_pil.g1950_itr6_781_pil.g1950.t1, itr6_781_pil.g1950_itr6_781_pil.g1950.t1.1.57f69242, itr6_45_pilo.g639_itr6_45_pilo.g639.t1, itr6_783_pil.g1976_itr6_783_pil.g1976.t1, itr6_4087_pi.g1307_itr6_4087_pi.g1307.t1, itr6_783_pil.g1977_itr6_783_pil.g1977.t1, itr6_2357_pi.g1289_itr6_2357_pi.g1289.t1
OG0000137	CSbapl.59013	itr6_2450_pi.g2088_itr6_2450_pi.g2088.t1.7.57f6923e, itr6_2450_pi.g2088_itr6_2450_pi.g2088.t1.1.57f6923d, itr6_2450_pi.g2088_itr6_2450_pi.g2088.t1.4.57f6923d, itr6_2450_pi.g2088_itr6_2450_pi.g2088.t1.3.57f6923d, itr6_2450_pi.g2088_itr6_2450_pi.g2088.t1.5.57f6923e, itr6_2450_pi.g2088_itr6_2450_pi.g2088.t1, itr6_2450_pi.g2088_itr6_2450_pi.g2088.t1.2.57f6923d, itr6_2450_pi.g2088_itr6_2450_pi.g2088.t…
OG0000140	CSbapl.73289	itr6_1745_pi.g1646_itr6_1745_pi.g1646.t1, itr6_1745_pi.g1646_itr6_1745_pi.g1646.t1.6.57f6f330, itr6_1745_pi.g1646_itr6_1745_pi.g1646.t1.5.57f6f330, itr6_1663_pi.g674_itr6_1663_pi.g674.t1, itr6_1745_pi.g1646_itr6_1745_pi.g1646.t1.4.57f6f330, itr6_1745_pi.g1646_itr6_1745_pi.g1646.t1.1.57f6f330, itr6_1745_pi.g1646_itr6_1745_pi.g1646.t1.2.57f6f330, itr6_1745_pi.g1646_itr6_1745_pi.g1646.t1.3.57f6f330
OG0000141	CSbapl.81165	itr6_1311_pi.g306_itr6_1311_pi.g306.t1.1.57f6923b, itr6_1311_pi.g306_itr6_1311_pi.g306.t1.2.57f6923b, itr6_1311_pi.g306_itr6_1311_pi.g306.t1.3.57f6923b, itr6_1311_pi.g306_itr6_1311_pi.g306.t1.6.57f6923b, itr6_1311_pi.g306_itr6_1311_pi.g306.t1.7.57f6923b, itr6_1311_pi.g306_itr6_1311_pi.g306.t1.5.57f6923b, itr6_1311_pi.g306_itr6_1311_pi.g306.t1.4.57f6923b, itr6_1311_pi.g306_itr6_1311_pi.g306.t1
OG0000160	CSbapl.52869, CSbapl.53258, CSbapl.39402, CSbapl.38347, CSbapl.13441, CSbapl.63782, CSbapl.10728	itr6_2982_pi.g851_itr6_2982_pi.g851.t1
OG0000164	CSbapl.24971, CSbapl.16150, CSbapl.16232, CSbapl.16168, CSbapl.99395, CSbapl.99356	itr6_4285_pi.g659_itr6_4285_pi.g659.t1, itr6_1823_pi.g2680_itr6_1823_pi.g2680.t1
OG0000167	CSbapl.17680	itr6_7_pilon.g133_itr6_7_pilon.g133.t1, itr6_7_pilon.g133_itr6_7_pilon.g133.t1.1.57f69242, itr6_7_pilon.g133_itr6_7_pilon.g133.t1.5.57f69242, itr6_7_pilon.g133_itr6_7_pilon.g133.t1.4.57f69242, itr6_7_pilon.g133_itr6_7_pilon.g133.t1.6.57f69242, itr6_7_pilon.g133_itr6_7_pilon.g133.t1.2.57f69242, itr6_7_pilon.g133_itr6_7_pilon.g133.t1.3.57f69242
OG0000168	CSbapl.7171, CSbapl.76713, CSbapl.63978, CSbapl.85, CSbapl.1813, CSbapl.1814, CSbapl.79401	itr6_3395_pi.g1532_itr6_3395_pi.g1532.t1
OG0000176	CSbapl.22768, CSbapl.3194, CSbapl.37075, CSbapl.35599, CSbapl.86903, CSbapl.67371, CSbapl.50420	itr6_487_pil.g2246_itr6_487_pil.g2246.t1
OG0000177	CSbapl.26744	itr6_4510_pi.g87_itr6_4510_pi.g88_itr6_4510_pi.g87.t1_itr6_4510_pi.g88.t1.6.57f6f335, itr6_4510_pi.g87_itr6_4510_pi.g88_itr6_4510_pi.g87.t1_itr6_4510_pi.g88.t1.3.57f6f335, itr6_4510_pi.g87_itr6_4510_pi.g88_itr6_4510_pi.g87.t1_itr6_4510_pi.g88.t1.2.57f6f335, itr6_4510_pi.g87_itr6_4510_pi.g88_itr6_4510_pi.g87.t1_itr6_4510_pi.g88.t1.4.57f6f335, itr6_4510_pi.g87_itr6_4510_pi.g88_itr6_4510_pi.g87.t1_i…
OG0000179	CSbapl.27467	itr6_2646_pi.g867_itr6_2646_pi.g867.t1.5.57f6923e.1.57f6f332, itr6_2646_pi.g867_itr6_2646_pi.g867.t1.3.57f6923e, itr6_2646_pi.g867_itr6_2646_pi.g867.t1.4.57f6923e, itr6_2646_pi.g867_itr6_2646_pi.g867.t1.5.57f6923e, itr6_2646_pi.g867_itr6_2646_pi.g867.t1.1.57f6923e, itr6_2646_pi.g867_itr6_2646_pi.g867.t1.2.57f6923e, itr6_2646_pi.g867_itr6_2646_pi.g867.t1
OG0000181	CSbapl.28466	itr6_5948_pi.g488_itr6_5948_pi.g488.t1.4.57f69241, itr6_5948_pi.g488_itr6_5948_pi.g488.t1, itr6_5948_pi.g488_itr6_5948_pi.g488.t1.5.57f69241, itr6_5948_pi.g488_itr6_5948_pi.g488.t1.6.57f69241, itr6_5948_pi.g488_itr6_5948_pi.g488.t1.2.57f69241, itr6_5948_pi.g488_itr6_5948_pi.g488.t1.1.57f69241, itr6_5948_pi.g488_itr6_5948_pi.g488.t1.3.57f69241
OG0000186	CSbapl.35704, CSbapl.35707, CSbapl.35712	itr6_692_pil.g713_itr6_692_pil.g713.t1, itr6_692_pil.g713_itr6_692_pil.g713.t1.1.57f69241, itr6_692_pil.g713_itr6_692_pil.g713.t1.4.57f69241, itr6_692_pil.g713_itr6_692_pil.g713.t1.2.57f69241, itr6_692_pil.g713_itr6_692_pil.g713.t1.3.57f69241
OG0000187	CSbapl.3919	itr6_5009_pi.g993_itr6_5009_pi.g993.t1.1.57f69240, itr6_5009_pi.g993_itr6_5009_pi.g993.t1, itr6_5009_pi.g993_itr6_5009_pi.g993.t1.4.57f69240, itr6_5009_pi.g993_itr6_5009_pi.g993.t1.3.57f69240, itr6_5009_pi.g993_itr6_5009_pi.g993.t1.2.57f69240, itr6_3703_pi.g1352_itr6_3703_pi.g1352.t1, itr6_3703_pi.g1352_itr6_3703_pi.g1352.t1.1.57f6923f
OG0000190	CSbapl.44483	itr6_4134_pi.g1606_itr6_4134_pi.g1606.t1.2.57f69240, itr6_4134_pi.g1606_itr6_4134_pi.g1606.t1.4.57f69240, itr6_4134_pi.g1606_itr6_4134_pi.g1606.t1.5.57f69240, itr6_4134_pi.g1606_itr6_4134_pi.g1606.t1.1.57f69240, itr6_4134_pi.g1606_itr6_4134_pi.g1606.t1, itr6_4134_pi.g1606_itr6_4134_pi.g1606.t1.1.57f6f334, itr6_4134_pi.g1606_itr6_4134_pi.g1606.t1.3.57f69240
OG0000191	CSbapl.45727	itr6_1503_pi.g2785_itr6_1503_pi.g2785.t1.2.57f6923c, itr6_1503_pi.g2785_itr6_1503_pi.g2785.t1, itr6_1503_pi.g2785_itr6_1503_pi.g2785.t1.5.57f6923c, itr6_1503_pi.g2785_itr6_1503_pi.g2785.t1.1.57f6923c, itr6_1503_pi.g2785_itr6_1503_pi.g2785.t1.3.57f6923c, itr6_1503_pi.g2785_itr6_1503_pi.g2785.t1.6.57f6923c, itr6_1503_pi.g2785_itr6_1503_pi.g2785.t1.4.57f6923c
OG0000192	CSbapl.5031	itr6_4648_pi.g769_itr6_4648_pi.g769.t1.4.57f69240, itr6_4648_pi.g769_itr6_4648_pi.g769.t1.1.57f69240, itr6_4648_pi.g769_itr6_4648_pi.g769.t1.3.57f69240, itr6_4648_pi.g769_itr6_4648_pi.g769.t1.6.57f69240, itr6_4648_pi.g769_itr6_4648_pi.g769.t1.5.57f69240, itr6_4648_pi.g769_itr6_4648_pi.g769.t1, itr6_4648_pi.g769_itr6_4648_pi.g769.t1.2.57f69240
OG0000195	CSbapl.61993	itr6_67_pilo.g924_itr6_67_pilo.g924.t1.6.57f69241, itr6_67_pilo.g924_itr6_67_pilo.g924.t1.2.57f69241, itr6_67_pilo.g924_itr6_67_pilo.g924.t1.3.57f69241, itr6_67_pilo.g924_itr6_67_pilo.g924.t1.5.57f69241, itr6_67_pilo.g924_itr6_67_pilo.g924.t1.1.57f69241, itr6_67_pilo.g924_itr6_67_pilo.g924.t1.4.57f69241, itr6_67_pilo.g924_itr6_67_pilo.g924.t1
OG0000197	CSbapl.63854, CSbapl.63851, CSbapl.63852, CSbapl.63849, CSbapl.63881, CSbapl.63848, CSbapl.63855	itr6_1363_pi.g1021_itr6_1363_pi.g1021.t1
OG0000198	CSbapl.71854	itr6_3470_pi.g2156_itr6_3470_pi.g2156.t1.2.57f6923f, itr6_3470_pi.g2156_itr6_3470_pi.g2156.t1.5.57f6923f, itr6_3470_pi.g2156_itr6_3470_pi.g2156.t1.6.57f6923f, itr6_3470_pi.g2156_itr6_3470_pi.g2156.t1.4.57f6923f, itr6_3470_pi.g2156_itr6_3470_pi.g2156.t1.3.57f6923f, itr6_3470_pi.g2156_itr6_3470_pi.g2156.t1, itr6_3470_pi.g2156_itr6_3470_pi.g2156.t1.1.57f6923f
OG0000200	CSbapl.79222	itr6_7_pilon.g139_itr6_7_pilon.g139.t1.3.57f69242, itr6_7_pilon.g139_itr6_7_pilon.g139.t1.1.57f69242, itr6_7_pilon.g139_itr6_7_pilon.g139.t1.5.57f69242, itr6_7_pilon.g139_itr6_7_pilon.g139.t1.6.57f69242, itr6_7_pilon.g139_itr6_7_pilon.g139.t1.4.57f69242, itr6_7_pilon.g139_itr6_7_pilon.g139.t1.2.57f69242, itr6_7_pilon.g139_itr6_7_pilon.g139.t1
OG0000201	CSbapl.79402	itr6_5795_pi.g48_itr6_5795_pi.g48.t1.4.57f69241.1.57f6f336, itr6_5795_pi.g48_itr6_5795_pi.g48.t1.2.57f69241, itr6_5795_pi.g48_itr6_5795_pi.g48.t1.4.57f69241, itr6_5795_pi.g48_itr6_5795_pi.g48.t1.5.57f69241, itr6_5795_pi.g48_itr6_5795_pi.g48.t1.1.57f69241, itr6_5795_pi.g48_itr6_5795_pi.g48.t1.3.57f69241, itr6_5795_pi.g48_itr6_5795_pi.g48.t1
OG0000203	CSbapl.90079, CSbapl.90153, CSbapl.90154, CSbapl.90078, CSbapl.90159	itr6_4011_pi.g1012_itr6_4011_pi.g1012.t1.2.57f69240, itr6_4011_pi.g1012_itr6_4011_pi.g1012.t1.1.57f69240, itr6_4011_pi.g1012_itr6_4011_pi.g1012.t1
OG0000204	CSbapl.9157	itr6_3409_pi.g1615_itr6_3409_pi.g1615.t1.3.57f6923f.2.57f6f333, itr6_3409_pi.g1615_itr6_3409_pi.g1615.t1.3.57f6923f.1.57f6f333, itr6_3409_pi.g1615_itr6_3409_pi.g1615.t1.1.57f6923f, itr6_3409_pi.g1615_itr6_3409_pi.g1615.t1.3.57f6923f, itr6_3409_pi.g1615_itr6_3409_pi.g1615.t1.3.57f6923f.3.57f6f333, itr6_3409_pi.g1615_itr6_3409_pi.g1615.t1, itr6_3409_pi.g1615_itr6_3409_pi.g1615.t1.2.57f6923f
OG0000236	CSbapl.10026, CSbapl.10016	itr6_519_pil.g2782_itr6_519_pil.g2782.t1.1.57f69241, itr6_519_pil.g2782_itr6_519_pil.g2782.t1.2.57f69241, itr6_519_pil.g2782_itr6_519_pil.g2782.t1.3.57f69241, itr6_519_pil.g2782_itr6_519_pil.g2782.t1.4.57f69241, itr6_519_pil.g2782_itr6_519_pil.g2782.t1
OG0000242	CSbapl.32271, CSbapl.72514, CSbapl.79280, CSbapl.12033, CSbapl.75626, CSbapl.30828	itr6_15141_p.g56_itr6_15141_p.g56.t1
OG0000244	CSbapl.17076, CSbapl.13108, CSbapl.52445, CSbapl.33459, CSbapl.97440, CSbapl.37574	itr6_2941_pi.g518_itr6_2941_pi.g518.t1
OG0000248	CSbapl.38799, CSbapl.98451, CSbapl.84567, CSbapl.15588, CSbapl.99124, CSbapl.36807	itr6_350_pil.g335_itr6_350_pil.g335.t1
OG0000251	CSbapl.17797	itr6_2118_pi.g2666_itr6_2118_pi.g2666.t1, itr6_445_pil.g1686_itr6_445_pil.g1686.t1, itr6_225_pil.g2821_itr6_225_pil.g2821.t1, itr6_544_pil.g3137_itr6_544_pil.g3137.t1, itr6_2918_pi.g262_itr6_2918_pi.g262.t1, itr6_1722_pi.g1287_itr6_1722_pi.g1287.t1
OG0000254	CSbapl.19920, CSbapl.19873, CSbapl.19916, CSbapl.19871, CSbapl.19923, CSbapl.19877	itr6_484_pil.g2217_itr6_484_pil.g2217.t1
OG0000259	CSbapl.24040	itr6_725_pil.g1245_itr6_725_pil.g1245.t1.5.57f69241, itr6_725_pil.g1245_itr6_725_pil.g1245.t1.2.57f69241, itr6_725_pil.g1245_itr6_725_pil.g1245.t1.4.57f69241, itr6_725_pil.g1245_itr6_725_pil.g1245.t1, itr6_725_pil.g1245_itr6_725_pil.g1245.t1.3.57f69241, itr6_725_pil.g1245_itr6_725_pil.g1245.t1.1.57f69241
OG0000264	CSbapl.30429, CSbapl.65133, CSbapl.91217, CSbapl.95588, CSbapl.72763, CSbapl.50817	itr6_650_pil.g74_itr6_650_pil.g74.t1
OG0000266	CSbapl.31783	itr6_4285_pi.g664_itr6_4285_pi.g664.t1.2.57f6f334, itr6_4285_pi.g664_itr6_4285_pi.g664.t1.3.57f6f334, itr6_4285_pi.g664_itr6_4285_pi.g664.t1.1.57f6f334, itr6_4285_pi.g664_itr6_4285_pi.g664.t1.4.57f6f334, itr6_4285_pi.g664_itr6_4285_pi.g664.t1.1.57f69240, itr6_4285_pi.g664_itr6_4285_pi.g664.t1
OG0000270	CSbapl.35851, CSbapl.35960	itr6_2473_pi.g2460_itr6_2473_pi.g2460.t1.1.57f6923e, itr6_2473_pi.g2460_itr6_2473_pi.g2460.t1.3.57f6923e, itr6_2473_pi.g2460_itr6_2473_pi.g2460.t1.2.57f6923e, itr6_2473_pi.g2460_itr6_2473_pi.g2460.t1.4.57f6923e, itr6_2473_pi.g2460_itr6_2473_pi.g2460.t1
OG0000273	CSbapl.39174	itr6_3714_pi.g1437_itr6_3714_pi.g1439_itr6_3714_pi.g1437.t1_itr6_3714_pi.g1439.t1.2.57f6f333, itr6_3714_pi.g1437_itr6_3714_pi.g1439_itr6_3714_pi.g1437.t1_itr6_3714_pi.g1439.t1.3.57f6f333, itr6_3714_pi.g1437_itr6_3714_pi.g1439_itr6_3714_pi.g1437.t1_itr6_3714_pi.g1439.t1, itr6_3714_pi.g1437_itr6_3714_pi.g1439_itr6_3714_pi.g1437.t1_itr6_3714_pi.g1439.t1.1.57f6f333, itr6_3714_pi.g1437_itr6_3714_pi.g1…
OG0000274	CSbapl.39957	itr6_1437_pi.g1965_itr6_1437_pi.g1965.t1.2.57f6923c, itr6_1437_pi.g1965_itr6_1437_pi.g1965.t1.1.57f6923c, itr6_1437_pi.g1965_itr6_1437_pi.g1965.t1.3.57f6923c, itr6_1437_pi.g1965_itr6_1437_pi.g1965.t1, itr6_1437_pi.g1965_itr6_1437_pi.g1965.t1.4.57f6923c, itr6_1437_pi.g1965_itr6_1437_pi.g1965.t1.5.57f6923c
OG0000278	CSbapl.51140	itr6_1825_pi.g2711_itr6_1825_pi.g2711.t1, itr6_781_pil.g1964_itr6_781_pil.g1964.t1, itr6_3972_pi.g828_itr6_3972_pi.g828.t1, itr6_3102_pi.g2112_itr6_3102_pi.g2112.t1, itr6_4205_pi.g180_itr6_4205_pi.g180.t1, itr6_1798_pi.g2349_itr6_1798_pi.g2349.t1
OG0000279	CSbapl.53263	itr6_1670_pi.g767_itr6_1670_pi.g767.t1.3.57f6923c, itr6_1670_pi.g767_itr6_1670_pi.g767.t1.5.57f6923c, itr6_1670_pi.g767_itr6_1670_pi.g767.t1.1.57f6923c, itr6_1670_pi.g767_itr6_1670_pi.g767.t1, itr6_1670_pi.g767_itr6_1670_pi.g767.t1.2.57f6923c, itr6_1670_pi.g767_itr6_1670_pi.g767.t1.4.57f6923c
OG0000280	CSbapl.53480, CSbapl.55102	itr6_4434_pi.g1514_itr6_4434_pi.g1514.t1, itr6_4434_pi.g1514_itr6_4434_pi.g1514.t1.1.57f69240, itr6_4434_pi.g1514_itr6_4434_pi.g1514.t1.2.57f69240, itr6_4434_pi.g1514_itr6_4434_pi.g1514.t1.4.57f69240, itr6_4434_pi.g1514_itr6_4434_pi.g1514.t1.3.57f69240
OG0000281	CSbapl.56432	itr6_3293_pi.g652_itr6_3293_pi.g652.t1, itr6_3293_pi.g652_itr6_3293_pi.g652.t1.5.57f6923f, itr6_3293_pi.g652_itr6_3293_pi.g652.t1.1.57f6923f, itr6_3293_pi.g652_itr6_3293_pi.g652.t1.3.57f6923f, itr6_3293_pi.g652_itr6_3293_pi.g652.t1.2.57f6923f, itr6_3293_pi.g652_itr6_3293_pi.g652.t1.4.57f6923f
OG0000282	CSbapl.57266	itr6_49_pilo.g724_itr6_49_pilo.g724.t1, itr6_1722_pi.g1323_itr6_1722_pi.g1317_itr6_1722_pi.g1318_itr6_1722_pi.g1323.t1_itr6_1722_pi.g1317.t1_itr6_1722_pi.g1318.t1.1.57f6f330, itr6_1722_pi.g1323_itr6_1722_pi.g1317_itr6_1722_pi.g1318_itr6_1722_pi.g1323.t1_itr6_1722_pi.g1317.t1_itr6_1722_pi.g1318.t1.3.57f6f330, itr6_1722_pi.g1323_itr6_1722_pi.g1317_itr6_1722_pi.g1318_itr6_1722_pi.g1323.t1_itr6_1722_…
OG0000283	CSbapl.5798, CSbapl.5795, CSbapl.62481	itr6_1456_pi.g2270_itr6_1456_pi.g2270.t1.1.57f6923c, itr6_1456_pi.g2270_itr6_1456_pi.g2270.t1, itr6_1456_pi.g2270_itr6_1456_pi.g2270.t1.2.57f6923c, itr6_1456_pi.g2270_itr6_1456_pi.g2270.t1.3.57f6923c
OG0000289	CSbapl.81772	itr6_490_pil.g2386_itr6_490_pil.g2386.t1.3.57f69240, itr6_490_pil.g2386_itr6_490_pil.g2386.t1.5.57f69240, itr6_490_pil.g2386_itr6_490_pil.g2386.t1.1.57f69240, itr6_490_pil.g2386_itr6_490_pil.g2386.t1.2.57f69240, itr6_490_pil.g2386_itr6_490_pil.g2386.t1.4.57f69240, itr6_490_pil.g2386_itr6_490_pil.g2386.t1
OG0000290	CSbapl.81787	itr6_15064_p.g181_itr6_15064_p.g181.t1.5.57f6923c, itr6_15064_p.g181_itr6_15064_p.g181.t1.4.57f6923c, itr6_15064_p.g181_itr6_15064_p.g181.t1.3.57f6923c, itr6_15064_p.g181_itr6_15064_p.g181.t1.1.57f6923c, itr6_15064_p.g181_itr6_15064_p.g181.t1.2.57f6923c, itr6_15064_p.g181_itr6_15064_p.g181.t1
OG0000291	CSbapl.83374, CSbapl.83366	itr6_3916_pi.g472_itr6_3916_pi.g472.t1, itr6_3303_pi.g737_itr6_3303_pi.g737.t1, itr6_3916_pi.g472_itr6_3916_pi.g472.t1.1.57f6923f, itr6_3916_pi.g472_itr6_3916_pi.g472.t1.2.57f6923f, itr6_3904_pi.g380_itr6_3904_pi.g380.t1
OG0000292	CSbapl.8532	itr6_5073_pi.g1256_itr6_5073_pi.g1256.t1.1.57f69240, itr6_5073_pi.g1256_itr6_5073_pi.g1256.t1, itr6_5073_pi.g1256_itr6_5073_pi.g1256.t1.4.57f69240, itr6_5073_pi.g1256_itr6_5073_pi.g1256.t1.5.57f69240, itr6_5073_pi.g1256_itr6_5073_pi.g1256.t1.3.57f69240, itr6_5073_pi.g1256_itr6_5073_pi.g1256.t1.2.57f69240
OG0000293	CSbapl.90048	itr6_2788_pi.g2294_itr6_2788_pi.g2294.t1, itr6_2788_pi.g2294_itr6_2788_pi.g2294.t1.3.57f6923e, itr6_2788_pi.g2294_itr6_2788_pi.g2294.t1.1.57f6923e, itr6_2788_pi.g2294_itr6_2788_pi.g2294.t1.5.57f6923e, itr6_2788_pi.g2294_itr6_2788_pi.g2294.t1.2.57f6923e, itr6_2788_pi.g2294_itr6_2788_pi.g2294.t1.4.57f6923e
OG0000294	CSbapl.9131	itr6_3654_pi.g993_itr6_3654_pi.g993.t1.3.57f6923f, itr6_3654_pi.g993_itr6_3654_pi.g993.t1.2.57f6923f, itr6_3654_pi.g993_itr6_3654_pi.g993.t1.4.57f6923f, itr6_3654_pi.g993_itr6_3654_pi.g993.t1, itr6_3654_pi.g993_itr6_3654_pi.g993.t1.1.57f6923f, itr6_3654_pi.g993_itr6_3654_pi.g993.t1.5.57f6923f
OG0000295	CSbapl.94031, CSbapl.94035, CSbapl.94036, CSbapl.94033, CSbapl.94034, CSbapl.94032	itr6_2499_pi.g2733_itr6_2499_pi.g2733.t1
OG0000296	CSbapl.95747	itr6_3486_pi.g2272_itr6_3486_pi.g2272.t1.1.57f6923f, itr6_3486_pi.g2272_itr6_3486_pi.g2272.t1, itr6_3486_pi.g2272_itr6_3486_pi.g2272.t1.2.57f6923f, itr6_3486_pi.g2272_itr6_3486_pi.g2272.t1.3.57f6923f, itr6_3486_pi.g2272_itr6_3486_pi.g2272.t1.2.57f6923f.2.57f6f333, itr6_3486_pi.g2272_itr6_3486_pi.g2272.t1.3.57f6923f.1.57f6f333
OG0000298	CSbapl.97850, CSbapl.97834, CSbapl.97089	itr6_1145_pi.g2330_itr6_1145_pi.g2330.t1, itr6_1145_pi.g2330_itr6_1145_pi.g2330.t1.1.57f6923b
OG0000298	CSbapl.97801	itr6_4663_pi.g828_itr6_4663_pi.g828.t1
OG0000333	CSbapl.10295	itr6_479_pil.g2126_itr6_479_pil.g2126.t1.4.57f69240, itr6_479_pil.g2126_itr6_479_pil.g2126.t1.3.57f69240, itr6_479_pil.g2126_itr6_479_pil.g2126.t1.1.57f69240, itr6_479_pil.g2126_itr6_479_pil.g2126.t1.2.57f69240, itr6_479_pil.g2126_itr6_479_pil.g2126.t1
OG0000340	CSbapl.13556, CSbapl.36118, CSbapl.36112, CSbapl.36116	itr6_18740_p.g66_itr6_18740_p.g66.t1, itr6_4393_pi.g1309_itr6_4393_pi.g1309.t1
OG0000345	CSbapl.14009, CSbapl.14016	itr6_1945_pi.g306_itr6_1945_pi.g306.t1.1.57f6923d, itr6_1945_pi.g306_itr6_1945_pi.g306.t1, itr6_1945_pi.g306_itr6_1945_pi.g306.t1.3.57f6923d, itr6_1945_pi.g306_itr6_1945_pi.g306.t1.2.57f6923d
OG0000351	CSbapl.39888, CSbapl.9864, CSbapl.15388, CSbapl.15428, CSbapl.17215	itr6_14808_p.g34_itr6_14808_p.g34.t1
OG0000353	CSbapl.17571	itr6_1996_pi.g948_itr6_1996_pi.g948.t1.2.57f6923d, itr6_1996_pi.g948_itr6_1996_pi.g948.t1, itr6_1996_pi.g948_itr6_1996_pi.g948.t1.4.57f6923d, itr6_1996_pi.g948_itr6_1996_pi.g948.t1.3.57f6923d, itr6_1996_pi.g948_itr6_1996_pi.g948.t1.1.57f6923d
OG0000362	CSbapl.21544, CSbapl.21510	itr6_3908_pi.g401_itr6_3908_pi.g401.t1.1.57f6923f, itr6_3908_pi.g401_itr6_3908_pi.g401.t1.2.57f6923f, itr6_3908_pi.g401_itr6_3908_pi.g401.t1.3.57f6923f, itr6_3908_pi.g401_itr6_3908_pi.g401.t1
OG0000368	CSbapl.23381	itr6_3030_pi.g1393_itr6_3030_pi.g1393.t1, itr6_3030_pi.g1393_itr6_3030_pi.g1393.t1.4.57f6923e, itr6_3030_pi.g1393_itr6_3030_pi.g1393.t1.3.57f6923e, itr6_3030_pi.g1393_itr6_3030_pi.g1393.t1.2.57f6923e, itr6_3030_pi.g1393_itr6_3030_pi.g1393.t1.1.57f6923e
OG0000372	CSbapl.29537, CSbapl.25853, CSbapl.45133, CSbapl.39661, CSbapl.91527	itr6_11_pilo.g215_itr6_11_pilo.g215.t1
OG0000376	CSbapl.70419, CSbapl.26770, CSbapl.70417, CSbapl.70481, CSbapl.70476	itr6_784_pil.g1985_itr6_784_pil.g1985.t1
OG0000382	CSbapl.43132	itr6_4500_pi.g34_itr6_4500_pi.g34.t1
OG0000382	CSbapl.36892, CSbapl.55663, CSbapl.27776	itr6_6122_pi.g69_itr6_6122_pi.g69.t1
OG0000383	CSbapl.28154	itr6_3486_pi.g2274_itr6_3486_pi.g2274.t1.2.57f6923f, itr6_3486_pi.g2274_itr6_3486_pi.g2274.t1.3.57f6923f, itr6_3486_pi.g2274_itr6_3486_pi.g2274.t1.1.57f6923f, itr6_3486_pi.g2274_itr6_3486_pi.g2274.t1, itr6_3486_pi.g2274_itr6_3486_pi.g2274.t1.4.57f6923f
OG0000393	CSbapl.43476	itr6_674_pil.g401_itr6_674_pil.g401.t1.3.57f69241, itr6_674_pil.g401_itr6_674_pil.g401.t1.4.57f69241, itr6_674_pil.g401_itr6_674_pil.g401.t1, itr6_674_pil.g401_itr6_674_pil.g401.t1.1.57f69241, itr6_674_pil.g401_itr6_674_pil.g401.t1.2.57f69241
OG0000397	CSbapl.46201	itr6_1626_pi.g252_itr6_1626_pi.g250_itr6_1626_pi.g252.t1_itr6_1626_pi.g250.t1.2.57f6f330, itr6_1626_pi.g252_itr6_1626_pi.g250_itr6_1626_pi.g252.t1_itr6_1626_pi.g250.t1.1.57f6f330, itr6_1626_pi.g252_itr6_1626_pi.g250_itr6_1626_pi.g252.t1_itr6_1626_pi.g250.t1, itr6_1626_pi.g252_itr6_1626_pi.g250_itr6_1626_pi.g252.t1_itr6_1626_pi.g250.t1.3.57f6f330, itr6_1626_pi.g252_itr6_1626_pi.g250_itr6_1626_pi.g…
OG0000399	CSbapl.47475	itr6_3454_pi.g2042_itr6_3454_pi.g2042.t1.4.57f6923f, itr6_3454_pi.g2042_itr6_3454_pi.g2042.t1.3.57f6923f, itr6_3454_pi.g2042_itr6_3454_pi.g2042.t1, itr6_3454_pi.g2042_itr6_3454_pi.g2042.t1.2.57f6923f, itr6_3454_pi.g2042_itr6_3454_pi.g2042.t1.1.57f6923f
OG0000400	CSbapl.48181	itr6_5950_pi.g499_itr6_5950_pi.g499.t1.5.57f69241, itr6_5950_pi.g499_itr6_5950_pi.g499.t1.4.57f69241, itr6_5950_pi.g499_itr6_5950_pi.g499.t1.7.57f69241, itr6_5950_pi.g499_itr6_5950_pi.g499.t1, itr6_5950_pi.g499_itr6_5950_pi.g499.t1.3.57f69241
OG0000401	CSbapl.50240	itr6_2806_pi.g2508_itr6_2806_pi.g2508.t1, itr6_13522_p.g26_itr6_13522_p.g26.t1, itr6_13522_p.g26_itr6_13522_p.g26.t1.2.57f6923c, itr6_13522_p.g26_itr6_13522_p.g26.t1.1.57f6923c, itr6_2806_pi.g2508_itr6_2806_pi.g2508.t1.1.57f6923e
OG0000402	CSbapl.50620, CSbapl.50882	itr6_3810_pi.g2133_itr6_3810_pi.g2133.t1.3.57f6923f, itr6_3810_pi.g2133_itr6_3810_pi.g2133.t1.2.57f6923f, itr6_3810_pi.g2133_itr6_3810_pi.g2133.t1.1.57f6923f, itr6_3810_pi.g2133_itr6_3810_pi.g2133.t1
OG0000403	CSbapl.51194	itr6_4124_pi.g1544_itr6_4124_pi.g1544.t1.1.57f69240, itr6_4124_pi.g1544_itr6_4124_pi.g1544.t1.2.57f69240, itr6_4124_pi.g1544_itr6_4124_pi.g1544.t1, itr6_4124_pi.g1544_itr6_4124_pi.g1544.t1.3.57f69240, itr6_4124_pi.g1544_itr6_4124_pi.g1544.t1.5.57f69240
OG0000404	CSbapl.51235, CSbapl.51237	itr6_1182_pi.g2747_itr6_1182_pi.g2747.t1.2.57f6923b, itr6_1182_pi.g2747_itr6_1182_pi.g2747.t1.1.57f6923b, itr6_1182_pi.g2747_itr6_1182_pi.g2747.t1, itr6_1182_pi.g2747_itr6_1182_pi.g2747.t1.3.57f6923b
OG0000405	CSbapl.51422	itr6_1654_pi.g561_itr6_1654_pi.g561.t1.3.57f6923c, itr6_1654_pi.g561_itr6_1654_pi.g561.t1.2.57f6923c, itr6_1654_pi.g561_itr6_1654_pi.g561.t1.4.57f6923c, itr6_1654_pi.g561_itr6_1654_pi.g561.t1.1.57f6923c, itr6_1654_pi.g561_itr6_1654_pi.g561.t1
OG0000406	CSbapl.52497	itr6_3743_pi.g1633_itr6_3743_pi.g1633.t1.2.57f6923f, itr6_3743_pi.g1633_itr6_3743_pi.g1633.t1.1.57f6923f, itr6_3743_pi.g1633_itr6_3743_pi.g1633.t1.4.57f6923f, itr6_3743_pi.g1633_itr6_3743_pi.g1633.t1, itr6_3743_pi.g1633_itr6_3743_pi.g1633.t1.3.57f6923f
OG0000408	CSbapl.5395	itr6_9841_pi.g156_itr6_9841_pi.g156.t1.2.57f69242, itr6_9841_pi.g156_itr6_9841_pi.g156.t1.1.57f69242, itr6_9841_pi.g156_itr6_9841_pi.g156.t1, itr6_9841_pi.g156_itr6_9841_pi.g156.t1.4.57f69242, itr6_9841_pi.g156_itr6_9841_pi.g156.t1.3.57f69242
OG0000409	CSbapl.54484, CSbapl.54476, CSbapl.54467	itr6_1407_pi.g1590_itr6_1407_pi.g1590.t1.1.57f6923c.1.57f6f330, itr6_1407_pi.g1590_itr6_1407_pi.g1590.t1.1.57f6923c, itr6_1407_pi.g1590_itr6_1407_pi.g1590.t1
OG0000411	CSbapl.56140	itr6_5619_pi.g491_itr6_5619_pi.g491.t1, itr6_5619_pi.g491_itr6_5619_pi.g491.t1.1.57f69241.2.57f6f335, itr6_5619_pi.g491_itr6_5619_pi.g491.t1.1.57f69241.1.57f6f335, itr6_5619_pi.g491_itr6_5619_pi.g491.t1.1.57f69241, itr6_5619_pi.g491_itr6_5619_pi.g491.t1.2.57f69241
OG0000412	CSbapl.56438	itr6_20305_p.g31_itr6_20305_p.g31.t1, itr6_20305_p.g31_itr6_20305_p.g31.t1.4.57f6923d, itr6_20305_p.g31_itr6_20305_p.g31.t1.2.57f6923d, itr6_20305_p.g31_itr6_20305_p.g31.t1.3.57f6923d, itr6_20305_p.g31_itr6_20305_p.g31.t1.1.57f6923d
OG0000414	CSbapl.57731	itr6_2728_pi.g1697_itr6_2728_pi.g1697.t1.4.57f6923e, itr6_2728_pi.g1697_itr6_2728_pi.g1697.t1.1.57f6923e, itr6_2728_pi.g1697_itr6_2728_pi.g1697.t1, itr6_2728_pi.g1697_itr6_2728_pi.g1697.t1.3.57f6923e, itr6_2728_pi.g1697_itr6_2728_pi.g1697.t1.2.57f6923e
OG0000415	CSbapl.65009, CSbapl.65010, CSbapl.65013, CSbapl.65012	itr6_1329_pi.g532_itr6_1329_pi.g532.t1, itr6_759_pil.g1745_itr6_759_pil.g1745.t1
OG0000416	CSbapl.66306, CSbapl.66360	itr6_3550_pi.g106_itr6_3550_pi.g106.t1.1.57f6923f, itr6_3550_pi.g106_itr6_3550_pi.g106.t1.1.57f6923f.1.57f6f333, itr6_3550_pi.g106_itr6_3550_pi.g106.t1, itr6_3550_pi.g106_itr6_3550_pi.g106.t1.2.57f6923f
OG0000417	CSbapl.67725, CSbapl.67720, CSbapl.67718, CSbapl.67716, CSbapl.67714	itr6_6480_pi.g151_itr6_6480_pi.g151.t1
OG0000418	CSbapl.67724, CSbapl.67721, CSbapl.67719, CSbapl.67717, CSbapl.67715	itr6_6480_pi.g152_itr6_6480_pi.g152.t1
OG0000425	CSbapl.76809, CSbapl.76828	itr6_3130_pi.g2334_itr6_3130_pi.g2334.t1, itr6_3130_pi.g2334_itr6_3130_pi.g2334.t1.1.57f6923e, itr6_3130_pi.g2334_itr6_3130_pi.g2334.t1.2.57f6923e, itr6_3130_pi.g2334_itr6_3130_pi.g2334.t1.3.57f6923e
OG0000426	CSbapl.7858	itr6_1004_pi.g524_itr6_1004_pi.g524.t1.3.57f6923b, itr6_1004_pi.g524_itr6_1004_pi.g524.t1, itr6_1004_pi.g524_itr6_1004_pi.g524.t1.1.57f6923b, itr6_1004_pi.g524_itr6_1004_pi.g524.t1.4.57f6923b, itr6_1004_pi.g524_itr6_1004_pi.g524.t1.2.57f6923b
OG0000427	CSbapl.79248	itr6_1763_pi.g1847_itr6_1763_pi.g1847.t1, itr6_1763_pi.g1847_itr6_1763_pi.g1847.t1.3.57f6923c, itr6_1763_pi.g1847_itr6_1763_pi.g1847.t1.1.57f6923c.1.57f6f330, itr6_1763_pi.g1847_itr6_1763_pi.g1847.t1.1.57f6923c, itr6_1763_pi.g1847_itr6_1763_pi.g1847.t1.2.57f6923c
OG0000429	CSbapl.81022	itr6_1109_pi.g1973_itr6_1109_pi.g1973.t1.1.57f6923b, itr6_1109_pi.g1973_itr6_1109_pi.g1973.t1, itr6_4653_pi.g785_itr6_4653_pi.g785.t1, itr6_1109_pi.g1970_itr6_1109_pi.g1970.t1, itr6_4653_pi.g790_itr6_4653_pi.g790.t1
OG0000430	CSbapl.84040, CSbapl.84963	itr6_5610_pi.g458_itr6_5610_pi.g458.t1, itr6_5610_pi.g459_itr6_5610_pi.g459.t1.1.57f69241, itr6_5610_pi.g459_itr6_5610_pi.g459.t1, itr6_5610_pi.g459_itr6_5610_pi.g459.t1.1.57f69241.1.57f6f335
OG0000432	CSbapl.92419	itr6_3056_pi.g1663_itr6_3056_pi.g1663.t1.3.57f6923e, itr6_3056_pi.g1663_itr6_3056_pi.g1663.t1.1.57f6923e, itr6_3056_pi.g1663_itr6_3056_pi.g1663.t1.2.57f6923e, itr6_3056_pi.g1663_itr6_3056_pi.g1663.t1, itr6_3056_pi.g1663_itr6_3056_pi.g1663.t1.4.57f6923e
OG0000433	CSbapl.92726	itr6_1054_pi.g1232_itr6_1054_pi.g1232.t1, itr6_1054_pi.g1232_itr6_1054_pi.g1232.t1.1.57f6923b, itr6_1054_pi.g1232_itr6_1054_pi.g1232.t1.2.57f6923b.1.57f6f32f, itr6_1054_pi.g1232_itr6_1054_pi.g1232.t1.2.57f6923b, itr6_1054_pi.g1232_itr6_1054_pi.g1232.t1.3.57f6923b
OG0000434	CSbapl.92780	itr6_350_pil.g343_itr6_350_pil.g343.t1.1.57f6923f, itr6_350_pil.g343_itr6_350_pil.g343.t1.4.57f6923f, itr6_350_pil.g343_itr6_350_pil.g343.t1.3.57f6923f, itr6_350_pil.g343_itr6_350_pil.g343.t1, itr6_350_pil.g343_itr6_350_pil.g343.t1.2.57f6923f
OG0000505	CSbapl.100837	itr6_1463_pi.g2369_itr6_1463_pi.g2369.t1
OG0000505	CSbapl.19687, CSbapl.6092	itr6_3944_pi.g652_itr6_3944_pi.g652.t1
OG0000511	CSbapl.97628, CSbapl.10741, CSbapl.36808, CSbapl.99035	itr6_5923_pi.g406_itr6_5923_pi.g406.t1
OG0000512	CSbapl.10802, CSbapl.10828	itr6_2468_pi.g2381_itr6_2468_pi.g2381.t1, itr6_2468_pi.g2381_itr6_2468_pi.g2381.t1.1.57f6923e, itr6_2468_pi.g2381_itr6_2468_pi.g2381.t1.2.57f6923e
OG0000513	CSbapl.11244	itr6_5302_pi.g520_itr6_5302_pi.g520.t1.2.57f69241, itr6_5302_pi.g520_itr6_5302_pi.g520.t1.1.57f69241, itr6_5302_pi.g520_itr6_5302_pi.g520.t1, itr6_5302_pi.g520_itr6_5302_pi.g520.t1.3.57f69241
OG0000518	CSbapl.11975, CSbapl.11848, CSbapl.11980, CSbapl.25755	itr6_2268_pi.g197_itr6_2268_pi.g197.t1
OG0000521	CSbapl.12337	itr6_3079_pi.g1937_itr6_3079_pi.g1937.t1.1.57f6923e, itr6_3079_pi.g1937_itr6_3079_pi.g1937.t1, itr6_3079_pi.g1937_itr6_3079_pi.g1937.t1.3.57f6923e, itr6_3079_pi.g1937_itr6_3079_pi.g1937.t1.2.57f6923e
OG0000527	CSbapl.1301	itr6_2105_pi.g2421_itr6_2105_pi.g2421.t1.1.57f6923d, itr6_2105_pi.g2421_itr6_2105_pi.g2421.t1, itr6_2105_pi.g2421_itr6_2105_pi.g2421.t1.2.57f6923d, itr6_2105_pi.g2425_itr6_2105_pi.g2425.t1
OG0000530	CSbapl.13467, CSbapl.13448	itr6_16_pilo.g297_itr6_16_pilo.g297.t1.1.57f6923c, itr6_16_pilo.g297_itr6_16_pilo.g297.t1.2.57f6923c, itr6_16_pilo.g297_itr6_16_pilo.g297.t1
OG0000531	CSbapl.13939	itr6_1841_pi.g2894_itr6_1841_pi.g2894.t1.3.57f6923d, itr6_1841_pi.g2894_itr6_1841_pi.g2894.t1, itr6_1841_pi.g2894_itr6_1841_pi.g2894.t1.2.57f6923d, itr6_1841_pi.g2894_itr6_1841_pi.g2894.t1.1.57f6923d
OG0000532	CSbapl.14025	itr6_4888_pi.g427_itr6_4888_pi.g427.t1, itr6_4888_pi.g427_itr6_4888_pi.g427.t1.2.57f69240, itr6_4888_pi.g427_itr6_4888_pi.g427.t1.1.57f69240, itr6_4888_pi.g427_itr6_4888_pi.g427.t1.3.57f69240
OG0000534	CSbapl.14155	itr6_2029_pi.g1325_itr6_2029_pi.g1325.t1, itr6_3830_pi.g2329_itr6_3830_pi.g2329.t1.1.57f6923f.1.57f6f334, itr6_3830_pi.g2329_itr6_3830_pi.g2329.t1.1.57f6923f, itr6_3830_pi.g2329_itr6_3830_pi.g2329.t1
OG0000541	CSbapl.15061, CSbapl.15028	itr6_5376_pi.g773_itr6_5376_pi.g773.t1, itr6_5376_pi.g773_itr6_5376_pi.g773.t1.2.57f69241, itr6_5376_pi.g773_itr6_5376_pi.g773.t1.1.57f69241
OG0000548	CSbapl.16875	itr6_757_pil.g1699_itr6_757_pil.g1699.t1
OG0000548	CSbapl.16876	itr6_757_pil.g1699_itr6_757_pil.g1699.t1.2.57f6f336, itr6_757_pil.g1699_itr6_757_pil.g1699.t1.1.57f6f336
OG0000566	CSbapl.19733, CSbapl.19761	itr6_3353_pi.g1184_itr6_3353_pi.g1184.t1, itr6_3353_pi.g1184_itr6_3353_pi.g1184.t1.2.57f6923f, itr6_3353_pi.g1184_itr6_3353_pi.g1184.t1.1.57f6923f
OG0000576	CSbapl.22895	itr6_9341_pi.g22_itr6_9341_pi.g22.t1.1.57f69242, itr6_9341_pi.g22_itr6_9341_pi.g22.t1.3.57f69242, itr6_9341_pi.g22_itr6_9341_pi.g22.t1, itr6_9341_pi.g22_itr6_9341_pi.g22.t1.2.57f69242
OG0000579	CSbapl.24263	itr6_1062_pi.g1364_itr6_1062_pi.g1364.t1.2.57f6923b, itr6_1062_pi.g1364_itr6_1062_pi.g1364.t1.1.57f6923b, itr6_1062_pi.g1364_itr6_1062_pi.g1364.t1, itr6_1062_pi.g1364_itr6_1062_pi.g1364.t1.3.57f6923b
OG0000582	CSbapl.29193, CSbapl.75920, CSbapl.2491, CSbapl.35720	itr6_4381_pi.g1245_itr6_4381_pi.g1245.t1
OG0000583	CSbapl.25210	itr6_2687_pi.g1305_itr6_2687_pi.g1305.t1.1.57f6923e, itr6_2687_pi.g1305_itr6_2687_pi.g1305.t1.2.57f6923e, itr6_2687_pi.g1305_itr6_2687_pi.g1305.t1.3.57f6923e, itr6_2687_pi.g1305_itr6_2687_pi.g1305.t1
OG0000586	CSbapl.28017, CSbapl.27974	itr6_3822_pi.g2251_itr6_3822_pi.g2251.t1, itr6_3822_pi.g2251_itr6_3822_pi.g2251.t1.1.57f6923f, itr6_3822_pi.g2251_itr6_3822_pi.g2251.t1.2.57f6923f
OG0000588	CSbapl.28894	itr6_12631_p.g62_itr6_12631_p.g62.t1, itr6_12631_p.g62_itr6_12631_p.g62.t1.2.57f6923b, itr6_12631_p.g62_itr6_12631_p.g62.t1.3.57f6923b, itr6_12631_p.g62_itr6_12631_p.g62.t1.1.57f6923b
OG0000590	CSbapl.29994, CSbapl.30006, CSbapl.30003, CSbapl.29068	itr6_2052_pi.g1686_itr6_2052_pi.g1686.t1
OG0000591	CSbapl.306, CSbapl.30249	itr6_1049_pi.g1179_itr6_1049_pi.g1179.t1.1.57f6923b.1.57f6f32f, itr6_1049_pi.g1179_itr6_1049_pi.g1179.t1, itr6_1049_pi.g1179_itr6_1049_pi.g1179.t1.1.57f6923b
OG0000596	CSbapl.48500, CSbapl.48501, CSbapl.32251	itr6_3031_pi.g1423_itr6_3031_pi.g1423.t1, itr6_3031_pi.g1421_itr6_3031_pi.g1421.t1
OG0000598	CSbapl.80435, CSbapl.32453	itr6_3330_pi.g969_itr6_3330_pi.g969.t1, itr6_449_pil.g1727_itr6_449_pil.g1727.t1, itr6_2617_pi.g445_itr6_2617_pi.g445.t1
OG0000600	CSbapl.33408	itr6_1943_pi.g281_itr6_1943_pi.g281.t1.1.57f6923d, itr6_1943_pi.g281_itr6_1943_pi.g281.t1, itr6_3157_pi.g2534_itr6_3157_pi.g2534.t1, itr6_1943_pi.g284_itr6_1943_pi.g284.t1
OG0000602	CSbapl.37923, CSbapl.33619	itr6_3050_pi.g1618_itr6_3050_pi.g1618.t1, itr6_11341_p.g73_itr6_11341_p.g73.t1, itr6_16750_p.g36_itr6_16750_p.g36.t1
OG0000604	CSbapl.35755, CSbapl.35744, CSbapl.35751, CSbapl.35747	itr6_15899_p.g115_itr6_15899_p.g115.t1
OG0000605	CSbapl.35989	itr6_2790_pi.g2326_itr6_2790_pi.g2326.t1, itr6_2790_pi.g2326_itr6_2790_pi.g2326.t1.1.57f6923e, itr6_2790_pi.g2326_itr6_2790_pi.g2326.t1.2.57f6923e, itr6_2790_pi.g2326_itr6_2790_pi.g2326.t1.3.57f6923e
OG0000606	CSbapl.49623, CSbapl.49613, CSbapl.36110	itr6_3733_pi.g1559_itr6_3733_pi.g1559.t1, itr6_3733_pi.g1559_itr6_3733_pi.g1559.t1.1.57f6923f
OG0000607	CSbapl.362	itr6_2735_pi.g1784_itr6_2735_pi.g1784.t1, itr6_2735_pi.g1784_itr6_2735_pi.g1784.t1.3.57f6923e, itr6_2735_pi.g1784_itr6_2735_pi.g1784.t1.2.57f6923e, itr6_2735_pi.g1784_itr6_2735_pi.g1784.t1.1.57f6923e
OG0000611	CSbapl.37092, CSbapl.37107	itr6_4526_pi.g145_itr6_4526_pi.g145.t1, itr6_4526_pi.g145_itr6_4526_pi.g145.t1.1.57f69240, itr6_4526_pi.g145_itr6_4526_pi.g145.t1.2.57f69240
OG0000615	CSbapl.70532, CSbapl.38765, CSbapl.70534, CSbapl.38764	itr6_768_pil.g1814_itr6_768_pil.g1814.t1
OG0000618	CSbapl.39915	itr6_2330_pi.g968_itr6_2330_pi.g968.t1.1.57f6923d, itr6_2330_pi.g968_itr6_2330_pi.g968.t1.2.57f6923d, itr6_2330_pi.g968_itr6_2330_pi.g968.t1, itr6_2330_pi.g968_itr6_2330_pi.g968.t1.3.57f6923d
OG0000619	CSbapl.85173, CSbapl.85171, CSbapl.40286, CSbapl.94408	itr6_3183_pi.g2742_itr6_3183_pi.g2742.t1
OG0000624	CSbapl.43361, CSbapl.43357, CSbapl.43335, CSbapl.43344	itr6_1483_pi.g2563_itr6_1483_pi.g2563.t1
OG0000627	CSbapl.45756	itr6_1029_pi.g872_itr6_1029_pi.g872.t1.5.57f6923b, itr6_1029_pi.g872_itr6_1029_pi.g872.t1, itr6_1029_pi.g872_itr6_1029_pi.g872.t1.6.57f6923b, itr6_1029_pi.g872_itr6_1029_pi.g872.t1.1.57f6923b
OG0000628	CSbapl.4610	itr6_748_pil.g1541_itr6_748_pil.g1541.t1, itr6_5450_pi.g1054_itr6_5450_pi.g1054.t1, itr6_1162_pi.g2514_itr6_1162_pi.g2514.t1, itr6_4266_pi.g525_itr6_4266_pi.g525.t1
OG0000629	CSbapl.46125	itr6_2122_pi.g2711_itr6_2122_pi.g2711.t1, itr6_2122_pi.g2711_itr6_2122_pi.g2711.t1.6.57f6923d, itr6_2122_pi.g2711_itr6_2122_pi.g2711.t1.3.57f6923d, itr6_2122_pi.g2711_itr6_2122_pi.g2711.t1.8.57f6923d
OG0000630	CSbapl.46374, CSbapl.46391	itr6_2862_pi.g3011_itr6_2862_pi.g3011.t1, itr6_2862_pi.g3011_itr6_2862_pi.g3011.t1.1.57f6923e, itr6_2862_pi.g3011_itr6_2862_pi.g3011.t1.2.57f6923e
OG0000632	CSbapl.46830	itr6_78_pilo.g1009_itr6_78_pilo.g1009.t1.3.57f69242, itr6_78_pilo.g1009_itr6_78_pilo.g1009.t1, itr6_78_pilo.g1009_itr6_78_pilo.g1009.t1.1.57f69242, itr6_78_pilo.g1009_itr6_78_pilo.g1009.t1.2.57f69242
OG0000633	CSbapl.47014	itr6_34_pilo.g515_itr6_34_pilo.g515.t1.2.57f6923f.1.57f6f333, itr6_34_pilo.g515_itr6_34_pilo.g515.t1.2.57f6923f, itr6_34_pilo.g515_itr6_34_pilo.g515.t1.1.57f6923f, itr6_34_pilo.g515_itr6_34_pilo.g515.t1
OG0000634	CSbapl.47156	itr6_2876_pi.g3160_itr6_2876_pi.g3160.t1, itr6_2876_pi.g3160_itr6_2876_pi.g3160.t1.1.57f6923e, itr6_2876_pi.g3160_itr6_2876_pi.g3160.t1.1.57f6923e.1.57f6f332, itr6_2876_pi.g3160_itr6_2876_pi.g3160.t1.1.57f6923e.2.57f6f332
OG0000635	CSbapl.47818	itr6_5792_pi.g36_itr6_5792_pi.g36.t1.2.57f69241, itr6_5792_pi.g36_itr6_5792_pi.g36.t1.1.57f69241, itr6_5792_pi.g36_itr6_5792_pi.g36.t1, itr6_5792_pi.g36_itr6_5792_pi.g36.t1.3.57f69241
OG0000636	CSbapl.47975	itr6_1433_pi.g1878_itr6_1433_pi.g1878.t1, itr6_1433_pi.g1878_itr6_1433_pi.g1878.t1.1.57f6923c, itr6_1433_pi.g1878_itr6_1433_pi.g1878.t1.3.57f6923c, itr6_1433_pi.g1878_itr6_1433_pi.g1878.t1.2.57f6923c
OG0000637	CSbapl.48364	itr6_3781_pi.g1944_itr6_3781_pi.g1944.t1.1.57f6923f, itr6_3781_pi.g1944_itr6_3781_pi.g1944.t1.3.57f6923f, itr6_3781_pi.g1944_itr6_3781_pi.g1944.t1.2.57f6923f, itr6_3781_pi.g1944_itr6_3781_pi.g1944.t1
OG0000638	CSbapl.48391	itr6_2920_pi.g278_itr6_2920_pi.g278.t1, itr6_2920_pi.g278_itr6_2920_pi.g278.t1.1.57f6923e, itr6_2920_pi.g278_itr6_2920_pi.g278.t1.2.57f6923e, itr6_2920_pi.g278_itr6_2920_pi.g278.t1.3.57f6923e
OG0000639	CSbapl.4864, CSbapl.4924, CSbapl.4866	itr6_1783_pi.g2169_itr6_1783_pi.g2169.t1, itr6_1783_pi.g2170_itr6_1783_pi.g2170.t1
OG0000641	CSbapl.5036	itr6_2811_pi.g2555_itr6_2811_pi.g2557_itr6_2811_pi.g2555.t1_itr6_2811_pi.g2557.t1.2.57f6f332, itr6_2811_pi.g2555_itr6_2811_pi.g2557_itr6_2811_pi.g2555.t1_itr6_2811_pi.g2557.t1.3.57f6f332, itr6_2811_pi.g2555_itr6_2811_pi.g2557_itr6_2811_pi.g2555.t1_itr6_2811_pi.g2557.t1, itr6_2811_pi.g2555_itr6_2811_pi.g2557_itr6_2811_pi.g2555.t1_itr6_2811_pi.g2557.t1.1.57f6f332
OG0000642	CSbapl.50597, CSbapl.50868	itr6_2474_pi.g2463_itr6_2474_pi.g2463.t1, itr6_2474_pi.g2463_itr6_2474_pi.g2463.t1.1.57f6f332, itr6_2474_pi.g2463_itr6_2474_pi.g2463.t1.1.57f6923e
OG0000643	CSbapl.51558	itr6_5058_pi.g1211_itr6_5058_pi.g1211.t1.2.57f69240.1.57f6f335, itr6_5058_pi.g1211_itr6_5058_pi.g1211.t1.2.57f69240, itr6_5058_pi.g1211_itr6_5058_pi.g1211.t1.1.57f69240, itr6_5058_pi.g1211_itr6_5058_pi.g1211.t1
OG0000644	CSbapl.52187	itr6_4515_pi.g108_itr6_4515_pi.g108.t1, itr6_4515_pi.g108_itr6_4515_pi.g108.t1.2.57f69240, itr6_4515_pi.g108_itr6_4515_pi.g108.t1.1.57f69240, itr6_4515_pi.g108_itr6_4515_pi.g108.t1.3.57f69240
OG0000647	CSbapl.52576, CSbapl.52573	itr6_1467_pi.g2408_itr6_1467_pi.g2408.t1.1.57f6923c, itr6_1467_pi.g2408_itr6_1467_pi.g2408.t1.2.57f6923c, itr6_1467_pi.g2408_itr6_1467_pi.g2408.t1
OG0000649	CSbapl.52842, CSbapl.52831, CSbapl.52834	itr6_5497_pi.g136_itr6_5497_pi.g136.t1, itr6_5497_pi.g136_itr6_5497_pi.g136.t1.1.57f69241
OG0000653	CSbapl.57640, CSbapl.57626	itr6_518_pil.g2740_itr6_518_pil.g2740.t1.1.57f69241.2.57f6f335, itr6_518_pil.g2740_itr6_518_pil.g2740.t1.1.57f69241, itr6_518_pil.g2740_itr6_518_pil.g2740.t1
OG0000654	CSbapl.58484	itr6_5091_pi.g1326_itr6_5091_pi.g1326.t1.1.57f69241, itr6_5091_pi.g1326_itr6_5091_pi.g1326.t1.3.57f69241, itr6_5091_pi.g1326_itr6_5091_pi.g1326.t1.2.57f69241, itr6_5091_pi.g1326_itr6_5091_pi.g1326.t1
OG0000656	CSbapl.6070	itr6_1741_pi.g1575_itr6_1741_pi.g1575.t1.1.57f6923c.1.57f6f330, itr6_1741_pi.g1575_itr6_1741_pi.g1575.t1, itr6_1741_pi.g1575_itr6_1741_pi.g1575.t1.1.57f6923c, itr6_1741_pi.g1575_itr6_1741_pi.g1575.t1.2.57f6923c
OG0000658	CSbapl.61441	itr6_1314_pi.g367_itr6_1314_pi.g367.t1.2.57f6923b, itr6_1314_pi.g367_itr6_1314_pi.g367.t1, itr6_1314_pi.g367_itr6_1314_pi.g367.t1.1.57f6923b, itr6_1314_pi.g367_itr6_1314_pi.g367.t1.3.57f6923b
OG0000659	CSbapl.6146	itr6_1507_pi.g2832_itr6_1507_pi.g2832.t1.1.57f6923c, itr6_1507_pi.g2832_itr6_1507_pi.g2832.t1.2.57f6923c, itr6_1507_pi.g2832_itr6_1507_pi.g2832.t1, itr6_1507_pi.g2833_itr6_1507_pi.g2833.t1
OG0000660	CSbapl.61560	itr6_5893_pi.g317_itr6_5893_pi.g317.t1.1.57f69241.1.57f6f336, itr6_5893_pi.g317_itr6_5893_pi.g317.t1.1.57f69241.2.57f6f336, itr6_5893_pi.g317_itr6_5893_pi.g317.t1, itr6_5893_pi.g317_itr6_5893_pi.g317.t1.1.57f69241
OG0000661	CSbapl.63110	itr6_3220_pi.g57_itr6_3220_pi.g57.t1.1.57f6923f.1.57f6f333, itr6_3220_pi.g57_itr6_3220_pi.g57.t1.1.57f6923f.2.57f6f333, itr6_3220_pi.g57_itr6_3220_pi.g57.t1.1.57f6923f, itr6_3220_pi.g57_itr6_3220_pi.g57.t1
OG0000662	CSbapl.63130	itr6_1168_pi.g2601_itr6_1168_pi.g2601.t1.1.57f6f32f, itr6_1168_pi.g2601_itr6_1168_pi.g2601.t1.3.57f6f32f, itr6_1168_pi.g2601_itr6_1168_pi.g2601.t1.2.57f6f32f, itr6_1168_pi.g2601_itr6_1168_pi.g2601.t1
OG0000663	CSbapl.63510	itr6_4902_pi.g520_itr6_4902_pi.g520.t1.2.57f69240, itr6_4902_pi.g520_itr6_4902_pi.g520.t1, itr6_4902_pi.g520_itr6_4902_pi.g520.t1.1.57f69240, itr6_4902_pi.g520_itr6_4902_pi.g520.t1.3.57f69240
OG0000664	CSbapl.63577	itr6_3157_pi.g2562_itr6_3157_pi.g2562.t1, itr6_3157_pi.g2562_itr6_3157_pi.g2562.t1.1.57f6923e, itr6_3157_pi.g2562_itr6_3157_pi.g2562.t1.2.57f6923e, itr6_3157_pi.g2562_itr6_3157_pi.g2562.t1.3.57f6923e
OG0000667	CSbapl.64864	itr6_14120_p.g184_itr6_14120_p.g184.t1.3.57f6923c, itr6_14120_p.g184_itr6_14120_p.g184.t1.1.57f6923c, itr6_14120_p.g184_itr6_14120_p.g184.t1.2.57f6923c, itr6_14120_p.g184_itr6_14120_p.g184.t1
OG0000669	CSbapl.65424	itr6_3064_pi.g1754_itr6_3064_pi.g1754.t1.1.57f6923e, itr6_3064_pi.g1754_itr6_3064_pi.g1754.t1.2.57f6923e, itr6_3064_pi.g1754_itr6_3064_pi.g1754.t1, itr6_3064_pi.g1754_itr6_3064_pi.g1754.t1.3.57f6923e
OG0000670	CSbapl.65764	itr6_3184_pi.g2767_itr6_3184_pi.g2767.t1.2.57f6923e, itr6_3184_pi.g2767_itr6_3184_pi.g2767.t1.2.57f6923e.1.57f6f333, itr6_3184_pi.g2767_itr6_3184_pi.g2767.t1, itr6_3184_pi.g2767_itr6_3184_pi.g2767.t1.1.57f6923e
OG0000671	CSbapl.660	itr6_745_pil.g1454_itr6_745_pil.g1454.t1, itr6_745_pil.g1454_itr6_745_pil.g1454.t1.2.57f69241, itr6_745_pil.g1454_itr6_745_pil.g1454.t1.3.57f69241, itr6_745_pil.g1454_itr6_745_pil.g1454.t1.1.57f69241
OG0000673	CSbapl.66878	itr6_2481_pi.g2621_itr6_2481_pi.g2621.t1.3.57f6923e, itr6_2481_pi.g2621_itr6_2481_pi.g2621.t1, itr6_2481_pi.g2621_itr6_2481_pi.g2621.t1.2.57f6923e, itr6_2481_pi.g2621_itr6_2481_pi.g2621.t1.1.57f6923e
OG0000674	CSbapl.66910	itr6_3569_pi.g299_itr6_3569_pi.g298_itr6_3569_pi.g299.t1_itr6_3569_pi.g298.t1.2.57f6f333, itr6_3569_pi.g299_itr6_3569_pi.g298_itr6_3569_pi.g299.t1_itr6_3569_pi.g298.t1, itr6_3569_pi.g299_itr6_3569_pi.g298_itr6_3569_pi.g299.t1_itr6_3569_pi.g298.t1.1.57f6f333, itr6_3569_pi.g299_itr6_3569_pi.g298_itr6_3569_pi.g299.t1_itr6_3569_pi.g298.t1.3.57f6f333
OG0000675	CSbapl.67037, CSbapl.67069, CSbapl.67040, CSbapl.67060	itr6_1191_pi.g2827_itr6_1191_pi.g2827.t1
OG0000676	CSbapl.67340, CSbapl.67346	itr6_3810_pi.g2136_itr6_3810_pi.g2136.t1.1.57f6923f, itr6_3810_pi.g2136_itr6_3810_pi.g2136.t1, itr6_3810_pi.g2136_itr6_3810_pi.g2136.t1.2.57f6923f.1.57f6f334
OG0000678	CSbapl.67643, CSbapl.67653	itr6_1456_pi.g2275_itr6_1456_pi.g2275.t1, itr6_1456_pi.g2275_itr6_1456_pi.g2275.t1.1.57f6923c, itr6_1456_pi.g2275_itr6_1456_pi.g2275.t1.2.57f6923c
OG0000682	CSbapl.68562, CSbapl.68534	itr6_217_pil.g2723_itr6_217_pil.g2723.t1.1.57f6923d, itr6_217_pil.g2723_itr6_217_pil.g2723.t1, itr6_217_pil.g2723_itr6_217_pil.g2723.t1.1.57f6923d.1.57f6f331
OG0000683	CSbapl.68726, CSbapl.68719	itr6_3873_pi.g173_itr6_3873_pi.g174_itr6_3873_pi.g173.t1_itr6_3873_pi.g174.t1.2.57f6f334, itr6_3873_pi.g173_itr6_3873_pi.g174_itr6_3873_pi.g173.t1_itr6_3873_pi.g174.t1, itr6_3873_pi.g173_itr6_3873_pi.g174_itr6_3873_pi.g173.t1_itr6_3873_pi.g174.t1.1.57f6f334
OG0000684	CSbapl.68768, CSbapl.68766, CSbapl.68767	itr6_1024_pi.g846_itr6_1024_pi.g846.t1, itr6_1024_pi.g846_itr6_1024_pi.g846.t1.1.57f6f32f
OG0000688	CSbapl.69186	itr6_2586_pi.g184_itr6_2586_pi.g184.t1.1.57f6923e, itr6_2586_pi.g184_itr6_2586_pi.g184.t1.2.57f6923e, itr6_2586_pi.g184_itr6_2586_pi.g184.t1.3.57f6923e, itr6_2586_pi.g184_itr6_2586_pi.g184.t1
OG0000694	CSbapl.731, CSbapl.715, CSbapl.734, CSbapl.717	itr6_992_pil.g348_itr6_992_pil.g348.t1
OG0000696	CSbapl.81049	itr6_8061_pi.g21_itr6_8061_pi.g21.t1
OG0000696	CSbapl.81056, CSbapl.71705	itr6_19446_p.g78_itr6_19446_p.g78.t1
OG0000699	CSbapl.73176	itr6_4162_pi.g1774_itr6_4162_pi.g1774.t1.1.57f69240, itr6_4162_pi.g1774_itr6_4162_pi.g1774.t1, itr6_4162_pi.g1774_itr6_4162_pi.g1774.t1.3.57f69240, itr6_4162_pi.g1774_itr6_4162_pi.g1774.t1.2.57f69240
OG0000701	CSbapl.740	itr6_361_pil.g538_itr6_361_pil.g538.t1.3.57f6923f, itr6_361_pil.g538_itr6_361_pil.g538.t1, itr6_361_pil.g538_itr6_361_pil.g538.t1.2.57f6923f, itr6_361_pil.g538_itr6_361_pil.g538.t1.1.57f6923f
OG0000703	CSbapl.7644	itr6_748_pil.g1537_itr6_748_pil.g1537.t1.1.57f6f336, itr6_748_pil.g1537_itr6_748_pil.g1537.t1.1.57f69242.2.57f6f336, itr6_748_pil.g1537_itr6_748_pil.g1537.t1, itr6_748_pil.g1537_itr6_748_pil.g1537.t1.1.57f69242
OG0000704	CSbapl.7647	itr6_4862_pi.g268_itr6_4862_pi.g268.t1.3.57f69240, itr6_4862_pi.g268_itr6_4862_pi.g268.t1.2.57f69240, itr6_4862_pi.g268_itr6_4862_pi.g268.t1.1.57f69240, itr6_4862_pi.g268_itr6_4862_pi.g268.t1
OG0000705	CSbapl.78169	itr6_3340_pi.g1056_itr6_3340_pi.g1056.t1.1.57f6923f, itr6_3340_pi.g1056_itr6_3340_pi.g1056.t1.3.57f6923f, itr6_3340_pi.g1056_itr6_3340_pi.g1056.t1.2.57f6923f, itr6_3340_pi.g1056_itr6_3340_pi.g1056.t1
OG0000706	CSbapl.79395	itr6_3257_pi.g367_itr6_3257_pi.g367.t1.1.57f6f333, itr6_3257_pi.g367_itr6_3257_pi.g367.t1.2.57f6f333, itr6_3257_pi.g367_itr6_3257_pi.g367.t1, itr6_3257_pi.g367_itr6_3257_pi.g367.t1.1.57f6923f
OG0000707	CSbapl.79709, CSbapl.98071, CSbapl.97003, CSbapl.97029	itr6_1635_pi.g345_itr6_1635_pi.g345.t1
OG0000708	CSbapl.79860	itr6_2908_pi.g174_itr6_2908_pi.g174.t1.3.57f6923e, itr6_2908_pi.g174_itr6_2908_pi.g174.t1, itr6_2908_pi.g174_itr6_2908_pi.g174.t1.2.57f6923e, itr6_2908_pi.g174_itr6_2908_pi.g174.t1.1.57f6923e
OG0000709	CSbapl.80143	itr6_853_pil.g3096_itr6_853_pil.g3096.t1.2.57f69242, itr6_853_pil.g3096_itr6_853_pil.g3096.t1.3.57f69242, itr6_853_pil.g3096_itr6_853_pil.g3096.t1.1.57f69242, itr6_853_pil.g3096_itr6_853_pil.g3096.t1
OG0000710	CSbapl.80531, CSbapl.80515	itr6_1182_pi.g2739_itr6_1182_pi.g2739.t1, itr6_1182_pi.g2739_itr6_1182_pi.g2739.t1.2.57f6923b, itr6_1182_pi.g2739_itr6_1182_pi.g2739.t1.1.57f6923b
OG0000711	CSbapl.81257	itr6_2059_pi.g1794_itr6_2059_pi.g1794.t1.2.57f6923d, itr6_2059_pi.g1794_itr6_2059_pi.g1794.t1, itr6_2059_pi.g1794_itr6_2059_pi.g1794.t1.1.57f6923d, itr6_2059_pi.g1794_itr6_2059_pi.g1794.t1.3.57f6923d
OG0000712	CSbapl.81404	itr6_4561_pi.g321_itr6_4561_pi.g321.t1, itr6_4561_pi.g321_itr6_4561_pi.g321.t1.1.57f69240, itr6_4561_pi.g321_itr6_4561_pi.g321.t1.2.57f69240, itr6_4561_pi.g321_itr6_4561_pi.g321.t1.2.57f69240.1.57f6f335
OG0000713	CSbapl.81783, CSbapl.81851	itr6_2001_pi.g1016_itr6_2001_pi.g1016.t1.1.57f6923d, itr6_2001_pi.g1016_itr6_2001_pi.g1016.t1, itr6_2001_pi.g1016_itr6_2001_pi.g1016.t1.2.57f6923d
OG0000714	CSbapl.83529	itr6_807_pil.g2407_itr6_807_pil.g2407.t1.3.57f69242, itr6_807_pil.g2407_itr6_807_pil.g2407.t1.1.57f69242, itr6_807_pil.g2407_itr6_807_pil.g2407.t1, itr6_807_pil.g2407_itr6_807_pil.g2407.t1.2.57f69242
OG0000715	CSbapl.85143	itr6_4720_pi.g1192_itr6_4720_pi.g1192.t1.2.57f69240, itr6_4720_pi.g1192_itr6_4720_pi.g1192.t1.1.57f69240, itr6_4720_pi.g1192_itr6_4720_pi.g1192.t1, itr6_4720_pi.g1192_itr6_4720_pi.g1192.t1.3.57f69240
OG0000717	CSbapl.86359	itr6_4135_pi.g1613_itr6_4135_pi.g1613.t1, itr6_4135_pi.g1613_itr6_4135_pi.g1613.t1.1.57f69240, itr6_4135_pi.g1613_itr6_4135_pi.g1613.t1.3.57f69240, itr6_4135_pi.g1613_itr6_4135_pi.g1613.t1.2.57f69240
OG0000718	CSbapl.86645, CSbapl.86646	itr6_6603_pi.g255_itr6_6603_pi.g255.t1.2.57f69241, itr6_6603_pi.g255_itr6_6603_pi.g255.t1, itr6_6603_pi.g255_itr6_6603_pi.g255.t1.1.57f69241
OG0000719	CSbapl.87514	itr6_4111_pi.g1464_itr6_4111_pi.g1464.t1.2.57f69240, itr6_4111_pi.g1464_itr6_4111_pi.g1464.t1.1.57f69240, itr6_4111_pi.g1464_itr6_4111_pi.g1464.t1.3.57f69240, itr6_4111_pi.g1464_itr6_4111_pi.g1464.t1
OG0000720	CSbapl.88347	itr6_1177_pi.g2713_itr6_1177_pi.g2713.t1, itr6_1177_pi.g2713_itr6_1177_pi.g2713.t1.2.57f6923b, itr6_1177_pi.g2713_itr6_1177_pi.g2713.t1.1.57f6923b, itr6_1177_pi.g2713_itr6_1177_pi.g2713.t1.3.57f6923b
OG0000721	CSbapl.89135	itr6_4091_pi.g1320_itr6_4091_pi.g1320.t1, itr6_4091_pi.g1320_itr6_4091_pi.g1320.t1.3.57f69240, itr6_4091_pi.g1320_itr6_4091_pi.g1320.t1.2.57f69240, itr6_4091_pi.g1320_itr6_4091_pi.g1320.t1.1.57f69240
OG0000722	CSbapl.89371	itr6_721_pil.g1189_itr6_721_pil.g1189.t1.3.57f69241, itr6_721_pil.g1189_itr6_721_pil.g1189.t1, itr6_721_pil.g1189_itr6_721_pil.g1189.t1.2.57f69241, itr6_721_pil.g1189_itr6_721_pil.g1189.t1.1.57f69241
OG0000723	CSbapl.89485	itr6_2356_pi.g1275_itr6_2356_pi.g1275.t1, itr6_2356_pi.g1275_itr6_2356_pi.g1275.t1.3.57f6923d, itr6_2356_pi.g1275_itr6_2356_pi.g1275.t1.1.57f6923d, itr6_2356_pi.g1275_itr6_2356_pi.g1275.t1.2.57f6923d
OG0000724	CSbapl.90057	itr6_2672_pi.g1208_itr6_2672_pi.g1208.t1.1.57f6923e
OG0000724	CSbapl.89955	itr6_2672_pi.g1208_itr6_2672_pi.g1208.t1.1.57f6f332, itr6_2672_pi.g1208_itr6_2672_pi.g1208.t1
OG0000726	CSbapl.90634, CSbapl.90604	itr6_5012_pi.g1006_itr6_5012_pi.g1006.t1, itr6_6034_pi.g718_itr6_6034_pi.g718.t1, itr6_6034_pi.g718_itr6_6034_pi.g718.t1.1.57f69241
OG0000728	CSbapl.91928	itr6_2274_pi.g268_itr6_2274_pi.g269_itr6_2274_pi.g268.t1_itr6_2274_pi.g269.t1, itr6_2274_pi.g268_itr6_2274_pi.g269_itr6_2274_pi.g268.t1_itr6_2274_pi.g269.t1.1.57f6f331, itr6_2274_pi.g268_itr6_2274_pi.g269_itr6_2274_pi.g268.t1_itr6_2274_pi.g269.t1.2.57f6f331, itr6_2274_pi.g268_itr6_2274_pi.g269_itr6_2274_pi.g268.t1_itr6_2274_pi.g269.t1.3.57f6f331
OG0000729	CSbapl.92104	itr6_1473_pi.g2487_itr6_1473_pi.g2488_itr6_1473_pi.g2487.t1_itr6_1473_pi.g2488.t1.2.57f6f330, itr6_1473_pi.g2487_itr6_1473_pi.g2488_itr6_1473_pi.g2487.t1_itr6_1473_pi.g2488.t1.3.57f6f330, itr6_1473_pi.g2487_itr6_1473_pi.g2488_itr6_1473_pi.g2487.t1_itr6_1473_pi.g2488.t1.1.57f6f330, itr6_1473_pi.g2487_itr6_1473_pi.g2488_itr6_1473_pi.g2487.t1_itr6_1473_pi.g2488.t1
OG0000730	CSbapl.93355, CSbapl.93348, CSbapl.93350, CSbapl.93353	itr6_842_pil.g2921_itr6_842_pil.g2921.t1
OG0000732	CSbapl.94872	itr6_3276_pi.g495_itr6_3276_pi.g495.t1.1.57f6923f, itr6_3276_pi.g495_itr6_3276_pi.g495.t1, itr6_3276_pi.g495_itr6_3276_pi.g495.t1.2.57f6923f, itr6_3276_pi.g495_itr6_3276_pi.g495.t1.3.57f6923f
OG0000733	CSbapl.95434	itr6_4156_pi.g1716_itr6_4156_pi.g1716.t1.3.57f69240, itr6_4156_pi.g1716_itr6_4156_pi.g1716.t1.2.57f69240, itr6_4156_pi.g1716_itr6_4156_pi.g1716.t1, itr6_4156_pi.g1716_itr6_4156_pi.g1716.t1.1.57f69240
OG0000829	CSbapl.100272	itr6_2387_pi.g1530_itr6_2387_pi.g1530.t1, itr6_2387_pi.g1530_itr6_2387_pi.g1530.t1.2.57f6923d, itr6_2387_pi.g1530_itr6_2387_pi.g1530.t1.1.57f6923d
OG0000834	CSbapl.49835, CSbapl.100704	itr6_165_pil.g2054_itr6_165_pil.g2054.t1.1.57f6923c, itr6_165_pil.g2054_itr6_165_pil.g2054.t1
OG0000841	CSbapl.101192	itr6_1638_pi.g379_itr6_1638_pi.g379.t1.1.57f6923c, itr6_1638_pi.g379_itr6_1638_pi.g379.t1.1.57f6923c.2.57f6f330, itr6_1638_pi.g379_itr6_1638_pi.g379.t1.2.57f6923c
OG0000856	CSbapl.11458	itr6_692_pil.g750_itr6_692_pil.g750.t1, itr6_3918_pi.g486_itr6_3918_pi.g486.t1, itr6_3918_pi.g491_itr6_3918_pi.g491.t1
OG0000858	CSbapl.36714, CSbapl.11514	itr6_2094_pi.g2289_itr6_2094_pi.g2289.t1, itr6_3078_pi.g1935_itr6_3078_pi.g1935.t1
OG0000859	CSbapl.7319, CSbapl.11580, CSbapl.11569	itr6_222_pil.g2778_itr6_222_pil.g2778.t1
OG0000860	CSbapl.11624	itr6_1618_pi.g166_itr6_1618_pi.g166.t1, itr6_1618_pi.g166_itr6_1618_pi.g166.t1.1.57f6923c, itr6_1618_pi.g166_itr6_1618_pi.g166.t1.2.57f6923c
OG0000864	CSbapl.72523, CSbapl.72504, CSbapl.12238	itr6_1377_pi.g1215_itr6_1377_pi.g1215.t1
OG0000876	CSbapl.1452, CSbapl.1382, CSbapl.99781	itr6_3013_pi.g1226_itr6_3013_pi.g1226.t1
OG0000877	CSbapl.1390	itr6_3835_pi.g2372_itr6_3835_pi.g2372.t1.1.57f6923f, itr6_3835_pi.g2372_itr6_3835_pi.g2372.t1.2.57f6923f, itr6_3835_pi.g2372_itr6_3835_pi.g2372.t1
OG0000893	CSbapl.1677	itr6_6317_pi.g534_itr6_6317_pi.g534.t1.1.57f69241, itr6_6317_pi.g534_itr6_6317_pi.g534.t1.2.57f69241, itr6_6317_pi.g534_itr6_6317_pi.g534.t1
OG0000897	CSbapl.20557, CSbapl.20562, CSbapl.17103	itr6_2268_pi.g202_itr6_2268_pi.g202.t1
OG0000905	CSbapl.18246	itr6_1395_pi.g1391_itr6_1395_pi.g1391.t1.1.57f6f330, itr6_1395_pi.g1391_itr6_1395_pi.g1391.t1, itr6_1395_pi.g1391_itr6_1395_pi.g1391.t1.1.57f6923c
OG0000908	CSbapl.18811, CSbapl.81214, CSbapl.75458	itr6_1791_pi.g2281_itr6_1791_pi.g2281.t1
OG0000910	CSbapl.1938	itr6_2049_pi.g1636_itr6_2049_pi.g1636.t1.1.57f6923d, itr6_2049_pi.g1636_itr6_2049_pi.g1636.t1.2.57f6923d, itr6_2049_pi.g1636_itr6_2049_pi.g1636.t1
OG0000922	CSbapl.20455, CSbapl.2648, CSbapl.2653	itr6_2397_pi.g1597_itr6_2397_pi.g1597.t1
OG0000924	CSbapl.2120, CSbapl.2080, CSbapl.2110	itr6_1164_pi.g2538_itr6_1164_pi.g2538.t1
OG0000925	CSbapl.58325, CSbapl.32410, CSbapl.20813	itr6_3284_pi.g566_itr6_3284_pi.g566.t1
OG0000928	CSbapl.21279	itr6_2398_pi.g1608_itr6_2398_pi.g1608.t1.1.57f6923d, itr6_2398_pi.g1608_itr6_2398_pi.g1608.t1.2.57f6923d, itr6_2398_pi.g1608_itr6_2398_pi.g1608.t1
OG0000930	CSbapl.2168, CSbapl.2165	itr6_376_pil.g728_itr6_376_pil.g728.t1, itr6_376_pil.g728_itr6_376_pil.g728.t1.1.57f6923f
OG0000937	CSbapl.22090, CSbapl.22089	itr6_8003_pi.g255_itr6_8003_pi.g255.t1.1.57f6f336, itr6_8003_pi.g255_itr6_8003_pi.g255.t1
OG0000939	CSbapl.22147	itr6_4763_pi.g1444_itr6_4763_pi.g1444.t1, itr6_4763_pi.g1444_itr6_4763_pi.g1444.t1.2.57f69240, itr6_4763_pi.g1444_itr6_4763_pi.g1444.t1.1.57f69240
OG0000944	CSbapl.22524, CSbapl.77302	itr6_2933_pi.g429_itr6_2933_pi.g429.t1, itr6_6923_pi.g114_itr6_6923_pi.g114.t1
OG0000952	CSbapl.24489	itr6_3600_pi.g513_itr6_3600_pi.g513.t1, itr6_7353_pi.g233_itr6_7353_pi.g233.t1, itr6_3600_pi.g512_itr6_3600_pi.g512.t1
OG0000958	CSbapl.25318, CSbapl.25366	itr6_2836_pi.g2797_itr6_2836_pi.g2797.t1, itr6_2836_pi.g2797_itr6_2836_pi.g2797.t1.1.57f6923e
OG0000959	CSbapl.25919, CSbapl.26888, CSbapl.26880	itr6_4607_pi.g513_itr6_4607_pi.g513.t1
OG0000963	CSbapl.26757	itr6_1471_pi.g2446_itr6_1471_pi.g2446.t1.1.57f6923c, itr6_1471_pi.g2446_itr6_1471_pi.g2446.t1.2.57f6923c, itr6_1471_pi.g2446_itr6_1471_pi.g2446.t1
OG0000972	CSbapl.27708, CSbapl.27684	itr6_5676_pi.g713_itr6_5676_pi.g713.t1, itr6_5676_pi.g713_itr6_5676_pi.g713.t1.1.57f69241
OG0000974	CSbapl.28321, CSbapl.28324	itr6_3392_pi.g1517_itr6_3392_pi.g1517.t1, itr6_3341_pi.g1087_itr6_3341_pi.g1087.t1
OG0000975	CSbapl.28379, CSbapl.79523, CSbapl.28381	itr6_13525_p.g30_itr6_13525_p.g30.t1
OG0000978	CSbapl.64381, CSbapl.64328, CSbapl.28829	itr6_2437_pi.g1966_itr6_2437_pi.g1966.t1
OG0000981	CSbapl.29543	itr6_2067_pi.g1962_itr6_2067_pi.g1962.t1.2.57f6f331, itr6_2067_pi.g1962_itr6_2067_pi.g1962.t1.1.57f6f331, itr6_2067_pi.g1962_itr6_2067_pi.g1962.t1
OG0000982	CSbapl.29664	itr6_808_pil.g2416_itr6_808_pil.g2416.t1.1.57f69242, itr6_808_pil.g2416_itr6_808_pil.g2416.t1, itr6_808_pil.g2416_itr6_808_pil.g2416.t1.2.57f69242
OG0000987	CSbapl.30951, CSbapl.30908	itr6_3220_pi.g55_itr6_3220_pi.g55.t1.1.57f6923f, itr6_3220_pi.g55_itr6_3220_pi.g55.t1
OG0000997	CSbapl.32606, CSbapl.4829	itr6_236_pil.g2969_itr6_236_pil.g2969.t1, itr6_14308_p.g103_itr6_14308_p.g103.t1
OG0000998	CSbapl.32908, CSbapl.32928	itr6_2699_pi.g1406_itr6_2699_pi.g1406.t1, itr6_2699_pi.g1406_itr6_2699_pi.g1406.t1.1.57f6923e
OG0001002	CSbapl.33748, CSbapl.55197	itr6_3783_pi.g1968_itr6_3783_pi.g1968.t1, itr6_9270_pi.g224_itr6_9270_pi.g224.t1
OG0001006	CSbapl.34354	itr6_1627_pi.g270_itr6_1627_pi.g270.t1.1.57f6923c, itr6_1627_pi.g270_itr6_1627_pi.g270.t1, itr6_1627_pi.g270_itr6_1627_pi.g270.t1.2.57f6923c
OG0001008	CSbapl.35394	itr6_1653_pi.g544_itr6_1653_pi.g544.t1.1.57f6923c.1.57f6f330, itr6_1653_pi.g544_itr6_1653_pi.g544.t1, itr6_1653_pi.g544_itr6_1653_pi.g544.t1.1.57f6923c
OG0001011	CSbapl.35935	itr6_798_pil.g2251_itr6_798_pil.g2256_itr6_798_pil.g2251.t1_itr6_798_pil.g2256.t1, itr6_798_pil.g2251_itr6_798_pil.g2256_itr6_798_pil.g2251.t1_itr6_798_pil.g2256.t1.1.57f6f336, itr6_798_pil.g2251_itr6_798_pil.g2256_itr6_798_pil.g2251.t1_itr6_798_pil.g2256.t1.2.57f6f336
OG0001013	CSbapl.36207	itr6_4543_pi.g226_itr6_4543_pi.g226.t1.2.57f69240, itr6_4543_pi.g226_itr6_4543_pi.g226.t1, itr6_4543_pi.g226_itr6_4543_pi.g226.t1.1.57f69240
OG0001015	CSbapl.36863	itr6_853_pil.g3101_itr6_853_pil.g3099_itr6_853_pil.g3101.t1_itr6_853_pil.g3099.t1.3.57f6f337, itr6_853_pil.g3101_itr6_853_pil.g3099_itr6_853_pil.g3101.t1_itr6_853_pil.g3099.t1.2.57f6f337, itr6_853_pil.g3101_itr6_853_pil.g3099_itr6_853_pil.g3101.t1_itr6_853_pil.g3099.t1.1.57f6f337
OG0001018	CSbapl.37317, CSbapl.37321, CSbapl.37326	itr6_2835_pi.g2774_itr6_2835_pi.g2774.t1
OG0001019	CSbapl.3736	itr6_1729_pi.g1397_itr6_1729_pi.g1397.t1.1.57f6923c, itr6_1729_pi.g1397_itr6_1729_pi.g1397.t1, itr6_1729_pi.g1397_itr6_1729_pi.g1397.t1.1.57f6f330
OG0001020	CSbapl.37476, CSbapl.37479	itr6_155_pil.g1923_itr6_155_pil.g1923.t1.1.57f6923c, itr6_155_pil.g1923_itr6_155_pil.g1923.t1
OG0001025	CSbapl.39057	itr6_3320_pi.g906_itr6_3320_pi.g909_itr6_3320_pi.g906.t1_itr6_3320_pi.g909.t1.1.57f6f333, itr6_3320_pi.g906_itr6_3320_pi.g909_itr6_3320_pi.g906.t1_itr6_3320_pi.g909.t1.2.57f6f333, itr6_3320_pi.g906_itr6_3320_pi.g909_itr6_3320_pi.g906.t1_itr6_3320_pi.g909.t1
OG0001026	CSbapl.39140, CSbapl.39148, CSbapl.39145	itr6_6367_pi.g665_itr6_6367_pi.g665.t1
OG0001027	CSbapl.4110, CSbapl.4075, CSbapl.4803	itr6_3838_pi.g2415_itr6_3838_pi.g2415.t1
OG0001028	CSbapl.40805	itr6_6052_pi.g775_itr6_6052_pi.g775.t1.2.57f69241, itr6_6052_pi.g775_itr6_6052_pi.g775.t1, itr6_6052_pi.g775_itr6_6052_pi.g775.t1.1.57f69241
OG0001032	CSbapl.42330	itr6_5731_pi.g909_itr6_5731_pi.g909.t1.2.57f69241, itr6_5731_pi.g909_itr6_5731_pi.g909.t1.1.57f69241, itr6_5731_pi.g909_itr6_5731_pi.g909.t1
OG0001034	CSbapl.42500	itr6_3781_pi.g1936_itr6_3781_pi.g1936.t1.1.57f6923f, itr6_3781_pi.g1936_itr6_3781_pi.g1936.t1.2.57f6923f, itr6_3781_pi.g1936_itr6_3781_pi.g1936.t1
OG0001037	CSbapl.43090, CSbapl.43155	itr6_1737_pi.g1513_itr6_1737_pi.g1513.t1, itr6_1737_pi.g1513_itr6_1737_pi.g1513.t1.1.57f6923c
OG0001040	CSbapl.43901, CSbapl.43903	itr6_1776_pi.g2057_itr6_1776_pi.g2057.t1.1.57f6923c, itr6_1776_pi.g2057_itr6_1776_pi.g2057.t1
OG0001045	CSbapl.45161	itr6_1044_pi.g1063_itr6_1044_pi.g1063.t1.1.57f6923b, itr6_1044_pi.g1063_itr6_1044_pi.g1063.t1, itr6_1044_pi.g1063_itr6_1044_pi.g1063.t1.2.57f6923b
OG0001046	CSbapl.4591, CSbapl.4651	itr6_1747_pi.g1681_itr6_1747_pi.g1681.t1, itr6_2741_pi.g1854_itr6_2741_pi.g1854.t1
OG0001047	CSbapl.4611, CSbapl.4626, CSbapl.4613	itr6_2999_pi.g1059_itr6_2999_pi.g1059.t1
OG0001048	CSbapl.46129	itr6_3865_pi.g132_itr6_3865_pi.g132.t1.1.57f6923f, itr6_3865_pi.g132_itr6_3865_pi.g132.t1, itr6_3865_pi.g132_itr6_3865_pi.g132.t1.2.57f6923f
OG0001049	CSbapl.50863, CSbapl.68348, CSbapl.46182	itr6_4694_pi.g1003_itr6_4694_pi.g1003.t1
OG0001052	CSbapl.47201	itr6_4707_pi.g1079_itr6_4707_pi.g1079.t1, itr6_4707_pi.g1079_itr6_4707_pi.g1079.t1.2.57f69240, itr6_4707_pi.g1079_itr6_4707_pi.g1079.t1.1.57f69240
OG0001053	CSbapl.47443	itr6_5816_pi.g126_itr6_5816_pi.g126.t1.2.57f69241, itr6_5816_pi.g126_itr6_5816_pi.g126.t1.1.57f69241, itr6_5816_pi.g126_itr6_5816_pi.g126.t1
OG0001056	CSbapl.48207	itr6_1326_pi.g478_itr6_1326_pi.g478.t1, itr6_1326_pi.g478_itr6_1326_pi.g478.t1.1.57f6923c, itr6_1326_pi.g483_itr6_1326_pi.g483.t1
OG0001059	CSbapl.48421	itr6_3233_pi.g199_itr6_3233_pi.g199.t1.1.57f6923f, itr6_3233_pi.g199_itr6_3233_pi.g199.t1, itr6_3233_pi.g199_itr6_3233_pi.g199.t1.2.57f6923f
OG0001060	CSbapl.48634, CSbapl.48679	itr6_3875_pi.g213_itr6_3875_pi.g213.t1, itr6_2531_pi.g3150_itr6_2531_pi.g3150.t1
OG0001062	CSbapl.49230	itr6_6375_pi.g682_itr6_6375_pi.g682.t1, itr6_6375_pi.g682_itr6_6375_pi.g682.t1.1.57f69241, itr6_9939_pi.g214_itr6_9939_pi.g214.t1
OG0001063	CSbapl.49252	itr6_1375_pi.g1190_itr6_1375_pi.g1191_itr6_1375_pi.g1190.t1_itr6_1375_pi.g1191.t1.1.57f6f330, itr6_1375_pi.g1190_itr6_1375_pi.g1191_itr6_1375_pi.g1190.t1_itr6_1375_pi.g1191.t1.2.57f6f330, itr6_1375_pi.g1190_itr6_1375_pi.g1191_itr6_1375_pi.g1190.t1_itr6_1375_pi.g1191.t1
OG0001066	CSbapl.50267	itr6_4171_pi.g1808_itr6_4171_pi.g1808.t1, itr6_4171_pi.g1808_itr6_4171_pi.g1808.t1.1.57f6f334, itr6_4171_pi.g1808_itr6_4171_pi.g1808.t1.1.57f69240
OG0001067	CSbapl.50270	itr6_2116_pi.g2602_itr6_2116_pi.g2602.t1, itr6_2116_pi.g2602_itr6_2116_pi.g2602.t1.1.57f6923d, itr6_2116_pi.g2602_itr6_2116_pi.g2602.t1.2.57f6923d
OG0001068	CSbapl.50592, CSbapl.50861, CSbapl.50841	itr6_3983_pi.g888_itr6_3983_pi.g888.t1
OG0001070	CSbapl.51118	itr6_5783_pi.g12_itr6_5783_pi.g12.t1.1.57f6f336, itr6_5783_pi.g12_itr6_5783_pi.g12.t1.1.57f69241, itr6_5783_pi.g12_itr6_5783_pi.g12.t1
OG0001071	CSbapl.51889, CSbapl.51910	itr6_4977_pi.g853_itr6_4977_pi.g853.t1.1.57f69240, itr6_4977_pi.g853_itr6_4977_pi.g853.t1
OG0001072	CSbapl.51934, CSbapl.51939	itr6_3115_pi.g2250_itr6_3115_pi.g2250.t1.1.57f6923e, itr6_3115_pi.g2250_itr6_3115_pi.g2250.t1
OG0001074	CSbapl.77032, CSbapl.52537	itr6_1977_pi.g714_itr6_1977_pi.g714.t1.1.57f6923d, itr6_1977_pi.g714_itr6_1977_pi.g714.t1
OG0001075	CSbapl.77034, CSbapl.52539	itr6_1977_pi.g712_itr6_1977_pi.g712.t1.1.57f6923d, itr6_1977_pi.g712_itr6_1977_pi.g712.t1
OG0001076	CSbapl.5258	itr6_752_pil.g1615_itr6_752_pil.g1615.t1.1.57f69242, itr6_752_pil.g1615_itr6_752_pil.g1615.t1, itr6_752_pil.g1615_itr6_752_pil.g1615.t1.2.57f69242
OG0001077	CSbapl.52677	itr6_2576_pi.g77_itr6_2576_pi.g77.t1.1.57f6923e, itr6_2576_pi.g77_itr6_2576_pi.g77.t1, itr6_461_pil.g1891_itr6_461_pil.g1891.t1
OG0001079	CSbapl.53102	itr6_3074_pi.g1891_itr6_3074_pi.g1891.t1.1.57f6923e, itr6_3074_pi.g1891_itr6_3074_pi.g1891.t1, itr6_3074_pi.g1891_itr6_3074_pi.g1891.t1.2.57f6923e
OG0001080	CSbapl.53183, CSbapl.53196, CSbapl.53198	itr6_7251_pi.g148_itr6_7251_pi.g148.t1
OG0001082	CSbapl.77338, CSbapl.77340, CSbapl.53454	itr6_3880_pi.g244_itr6_3880_pi.g244.t1
OG0001083	CSbapl.53469, CSbapl.9794, CSbapl.53461	itr6_5771_pi.g1082_itr6_5771_pi.g1082.t1
OG0001084	CSbapl.53492, CSbapl.55111	itr6_1018_pi.g791_itr6_1018_pi.g791.t1.1.57f6923b, itr6_1018_pi.g791_itr6_1018_pi.g791.t1
OG0001088	CSbapl.55316	itr6_5221_pi.g249_itr6_5221_pi.g249.t1.2.57f69241, itr6_5221_pi.g249_itr6_5221_pi.g249.t1.1.57f69241, itr6_5221_pi.g249_itr6_5221_pi.g249.t1
OG0001090	CSbapl.55423	itr6_3893_pi.g344_itr6_3893_pi.g344.t1.2.57f6923f, itr6_3893_pi.g344_itr6_3893_pi.g344.t1.1.57f6923f, itr6_3893_pi.g344_itr6_3893_pi.g344.t1
OG0001091	CSbapl.55654	itr6_1054_pi.g1230_itr6_1054_pi.g1231_itr6_1054_pi.g1230.t1_itr6_1054_pi.g1231.t1.2.57f6f32f, itr6_1054_pi.g1230_itr6_1054_pi.g1231_itr6_1054_pi.g1230.t1_itr6_1054_pi.g1231.t1, itr6_1054_pi.g1230_itr6_1054_pi.g1231_itr6_1054_pi.g1230.t1_itr6_1054_pi.g1231.t1.1.57f6f32f
OG0001092	CSbapl.56381	itr6_4786_pi.g1528_itr6_4786_pi.g1528.t1, itr6_4786_pi.g1528_itr6_4786_pi.g1528.t1.2.57f69240, itr6_4786_pi.g1528_itr6_4786_pi.g1528.t1.1.57f69240
OG0001093	CSbapl.57013	itr6_770_pil.g1823_itr6_770_pil.g1823.t1, itr6_770_pil.g1823_itr6_770_pil.g1823.t1.1.57f69242, itr6_770_pil.g1823_itr6_770_pil.g1823.t1.2.57f69242
OG0001094	CSbapl.60341, CSbapl.57069	itr6_4065_pi.g1224_itr6_4065_pi.g1224.t1, itr6_4566_pi.g334_itr6_4566_pi.g334.t1
OG0001097	CSbapl.57979	itr6_345_pil.g274_itr6_345_pil.g274.t1, itr6_345_pil.g274_itr6_345_pil.g274.t1.2.57f6f333, itr6_345_pil.g274_itr6_345_pil.g274.t1.1.57f6f333
OG0001098	CSbapl.58199	itr6_2038_pi.g1520_itr6_2038_pi.g1520.t1.3.57f6923d, itr6_2038_pi.g1520_itr6_2038_pi.g1520.t1.1.57f6923d, itr6_2038_pi.g1520_itr6_2038_pi.g1520.t1.2.57f6923d
OG0001099	CSbapl.58433, CSbapl.58342	itr6_7635_pi.g183_itr6_7635_pi.g183.t1.1.57f69242, itr6_7635_pi.g183_itr6_7635_pi.g183.t1
OG0001100	CSbapl.58519	itr6_1654_pi.g557_itr6_1654_pi.g557.t1, itr6_1654_pi.g557_itr6_1654_pi.g557.t1.1.57f6923c, itr6_1654_pi.g557_itr6_1654_pi.g557.t1.2.57f6923c
OG0001101	CSbapl.58813, CSbapl.58736	itr6_2458_pi.g2231_itr6_2458_pi.g2231.t1, itr6_3805_pi.g2107_itr6_3805_pi.g2107.t1
OG0001102	CSbapl.58877	itr6_1108_pi.g1950_itr6_1108_pi.g1950.t1, itr6_1108_pi.g1950_itr6_1108_pi.g1950.t1.2.57f6923b, itr6_1108_pi.g1950_itr6_1108_pi.g1950.t1.1.57f6923b
OG0001105	CSbapl.59065	itr6_729_pil.g1285_itr6_729_pil.g1285.t1.4.57f69241, itr6_729_pil.g1285_itr6_729_pil.g1285.t1.1.57f69241, itr6_729_pil.g1285_itr6_729_pil.g1285.t1.3.57f69241
OG0001107	CSbapl.59936, CSbapl.59933, CSbapl.60000	itr6_2309_pi.g744_itr6_2309_pi.g744.t1
OG0001108	CSbapl.6032	itr6_3638_pi.g818_itr6_3638_pi.g818.t1.2.57f6923f, itr6_3638_pi.g818_itr6_3638_pi.g818.t1.1.57f6923f, itr6_3638_pi.g818_itr6_3638_pi.g818.t1
OG0001110	CSbapl.60738, CSbapl.60741, CSbapl.60745	itr6_20367_p.g55_itr6_20367_p.g55.t1
OG0001113	CSbapl.61291	itr6_3718_pi.g1457_itr6_3718_pi.g1457.t1.11.57f6923f, itr6_3718_pi.g1457_itr6_3718_pi.g1457.t1.12.57f6923f, itr6_3718_pi.g1457_itr6_3718_pi.g1457.t1
OG0001114	CSbapl.6155	itr6_1507_pi.g2830_itr6_1507_pi.g2830.t1, itr6_1507_pi.g2830_itr6_1507_pi.g2830.t1.2.57f6923c, itr6_1507_pi.g2830_itr6_1507_pi.g2830.t1.1.57f6923c
OG0001115	CSbapl.62288	itr6_5295_pi.g493_itr6_5295_pi.g493.t1.1.57f69241, itr6_5295_pi.g493_itr6_5295_pi.g493.t1.2.57f69241, itr6_5295_pi.g493_itr6_5295_pi.g493.t1
OG0001116	CSbapl.62357, CSbapl.62358	itr6_5939_pi.g452_itr6_5939_pi.g452.t1, itr6_5939_pi.g452_itr6_5939_pi.g452.t1.1.57f69241
OG0001117	CSbapl.6241, CSbapl.6244	itr6_1643_pi.g427_itr6_1643_pi.g427.t1.1.57f6923c, itr6_1643_pi.g427_itr6_1643_pi.g427.t1
OG0001118	CSbapl.63789, CSbapl.63730	itr6_683_pil.g548_itr6_683_pil.g548.t1, itr6_683_pil.g548_itr6_683_pil.g548.t1.1.57f69241
OG0001121	CSbapl.64293, CSbapl.64295	itr6_4870_pi.g332_itr6_4870_pi.g332.t1.1.57f69240, itr6_4870_pi.g332_itr6_4870_pi.g332.t1
OG0001123	CSbapl.64805	itr6_9559_pi.g222_itr6_9559_pi.g222.t1, itr6_6093_pi.g922_itr6_6093_pi.g922.t1, itr6_9559_pi.g223_itr6_9559_pi.g223.t1
OG0001126	CSbapl.65303	itr6_14141_p.g6_itr6_14141_p.g6.t1, itr6_14141_p.g6_itr6_14141_p.g6.t1.2.57f6923c, itr6_14141_p.g6_itr6_14141_p.g6.t1.1.57f6923c
OG0001130	CSbapl.90486, CSbapl.67256	itr6_2796_pi.g2418_itr6_2796_pi.g2418.t1, itr6_2796_pi.g2418_itr6_2796_pi.g2418.t1.1.57f6923e
OG0001134	CSbapl.68247	itr6_524_pil.g2869_itr6_524_pil.g2869.t1, itr6_524_pil.g2869_itr6_524_pil.g2869.t1.3.57f69241, itr6_524_pil.g2869_itr6_524_pil.g2869.t1.1.57f69241
OG0001135	CSbapl.68353, CSbapl.68352, CSbapl.68354	itr6_749_pil.g1566_itr6_749_pil.g1567_itr6_749_pil.g1566.t1_itr6_749_pil.g1567.t1
OG0001137	CSbapl.68565, CSbapl.68531	itr6_217_pil.g2724_itr6_217_pil.g2724.t1, itr6_217_pil.g2724_itr6_217_pil.g2724.t1.1.57f6923d
OG0001138	CSbapl.6856, CSbapl.6860	itr6_3397_pi.g1564_itr6_3397_pi.g1564.t1.1.57f6923f, itr6_3397_pi.g1564_itr6_3397_pi.g1564.t1
OG0001139	CSbapl.68794	itr6_976_pil.g199_itr6_976_pil.g199.t1.2.57f69242, itr6_976_pil.g199_itr6_976_pil.g199.t1, itr6_976_pil.g199_itr6_976_pil.g199.t1.1.57f69242
OG0001141	CSbapl.69902, CSbapl.69894	itr6_3957_pi.g769_itr6_3957_pi.g769.t1.1.57f6923f, itr6_3957_pi.g769_itr6_3957_pi.g769.t1
OG0001145	CSbapl.70991, CSbapl.71053, CSbapl.70989	itr6_2305_pi.g655_itr6_2305_pi.g655.t1
OG0001156	CSbapl.72930	itr6_4528_pi.g154_itr6_4528_pi.g154.t1, itr6_14237_p.g62_itr6_14237_p.g62.t1, itr6_19511_p.g125_itr6_19511_p.g125.t1
OG0001157	CSbapl.730	itr6_2829_pi.g2738_itr6_2829_pi.g2738.t1.2.57f6923e, itr6_2829_pi.g2738_itr6_2829_pi.g2738.t1.1.57f6923e, itr6_2829_pi.g2738_itr6_2829_pi.g2738.t1
OG0001158	CSbapl.73584, CSbapl.73577	itr6_662_pil.g287_itr6_662_pil.g287.t1, itr6_662_pil.g287_itr6_662_pil.g287.t1.1.57f69241
OG0001160	CSbapl.74159, CSbapl.74043	itr6_3714_pi.g1438_itr6_3714_pi.g1438.t1.1.57f6923f, itr6_3714_pi.g1438_itr6_3714_pi.g1438.t1
OG0001161	CSbapl.74298	itr6_2301_pi.g627_itr6_2301_pi.g627.t1.3.57f6923d, itr6_2301_pi.g627_itr6_2301_pi.g627.t1.1.57f6923d, itr6_2301_pi.g627_itr6_2301_pi.g627.t1
OG0001162	CSbapl.74389	itr6_692_pil.g731_itr6_692_pil.g731.t1, itr6_692_pil.g731_itr6_692_pil.g731.t1.2.57f69241, itr6_692_pil.g731_itr6_692_pil.g731.t1.1.57f69241
OG0001163	CSbapl.74538, CSbapl.74539, CSbapl.74497	itr6_4237_pi.g317_itr6_4237_pi.g317.t1
OG0001164	CSbapl.746	itr6_5720_pi.g863_itr6_5720_pi.g863.t1.1.57f69241, itr6_5720_pi.g863_itr6_5720_pi.g863.t1.2.57f69241, itr6_5720_pi.g863_itr6_5720_pi.g863.t1
OG0001165	CSbapl.74787	itr6_3586_pi.g447_itr6_3586_pi.g447.t1, itr6_3779_pi.g1916_itr6_3779_pi.g1916.t1, itr6_2467_pi.g2375_itr6_2467_pi.g2375.t1
OG0001167	CSbapl.75203, CSbapl.75201	itr6_4266_pi.g519_itr6_4266_pi.g519.t1, itr6_4266_pi.g517_itr6_4266_pi.g517.t1
OG0001168	CSbapl.75457, CSbapl.75459	itr6_1937_pi.g129_itr6_1937_pi.g129.t1.1.57f6923d, itr6_1937_pi.g129_itr6_1937_pi.g129.t1
OG0001169	CSbapl.76401	itr6_57_pilo.g833_itr6_57_pilo.g833.t1.1.57f69241, itr6_57_pilo.g833_itr6_57_pilo.g833.t1, itr6_57_pilo.g833_itr6_57_pilo.g833.t1.2.57f69241
OG0001170	CSbapl.7646	itr6_1805_pi.g2438_itr6_1805_pi.g2438.t1.1.57f6923c, itr6_1805_pi.g2438_itr6_1805_pi.g2438.t1, itr6_1805_pi.g2438_itr6_1805_pi.g2438.t1.2.57f6923c
OG0001171	CSbapl.78343	itr6_3646_pi.g931_itr6_3646_pi.g931.t1, itr6_3646_pi.g931_itr6_3646_pi.g931.t1.1.57f6923f, itr6_3646_pi.g931_itr6_3646_pi.g931.t1.2.57f6923f
OG0001173	CSbapl.78705, CSbapl.78706	itr6_17529_p.g111_itr6_17529_p.g111.t1.1.57f6923c, itr6_17529_p.g111_itr6_17529_p.g111.t1
OG0001174	CSbapl.79192	itr6_5483_pi.g89_itr6_5483_pi.g89.t1.1.57f69241, itr6_5483_pi.g89_itr6_5483_pi.g89.t1, itr6_5483_pi.g89_itr6_5483_pi.g89.t1.2.57f69241
OG0001175	CSbapl.79375	itr6_411_pil.g1226_itr6_411_pil.g1226.t1.1.57f69240, itr6_411_pil.g1226_itr6_411_pil.g1226.t1, itr6_411_pil.g1226_itr6_411_pil.g1226.t1.2.57f69240
OG0001176	CSbapl.79423	itr6_1409_pi.g1620_itr6_1409_pi.g1620.t1, itr6_1409_pi.g1620_itr6_1409_pi.g1620.t1.1.57f6923c, itr6_1409_pi.g1620_itr6_1409_pi.g1620.t1.2.57f6923c
OG0001177	CSbapl.79803	itr6_1678_pi.g827_itr6_1678_pi.g827.t1.1.57f6923c.1.57f6f330, itr6_1678_pi.g827_itr6_1678_pi.g827.t1, itr6_1678_pi.g827_itr6_1678_pi.g827.t1.1.57f6923c
OG0001178	CSbapl.79970	itr6_2896_pi.g97_itr6_2896_pi.g97.t1.2.57f6923e, itr6_2896_pi.g97_itr6_2896_pi.g97.t1.1.57f6923e, itr6_2896_pi.g97_itr6_2896_pi.g97.t1
OG0001179	CSbapl.80431	itr6_3081_pi.g1951_itr6_3081_pi.g1951.t1, itr6_3081_pi.g1951_itr6_3081_pi.g1951.t1.1.57f6923e, itr6_3081_pi.g1951_itr6_3081_pi.g1951.t1.2.57f6923e
OG0001180	CSbapl.80901	itr6_2866_pi.g3021_itr6_2866_pi.g3021.t1, itr6_2866_pi.g3021_itr6_2866_pi.g3021.t1.2.57f6923e, itr6_2866_pi.g3021_itr6_2866_pi.g3021.t1.1.57f6923e
OG0001182	CSbapl.82283	itr6_4439_pi.g1536_itr6_4439_pi.g1536.t1, itr6_4439_pi.g1536_itr6_4439_pi.g1536.t1.2.57f69240, itr6_4439_pi.g1536_itr6_4439_pi.g1536.t1.1.57f69240
OG0001183	CSbapl.82783, CSbapl.82744, CSbapl.82741	itr6_813_pil.g2466_itr6_813_pil.g2466.t1
OG0001184	CSbapl.83239	itr6_2024_pi.g1282_itr6_2024_pi.g1282.t1, itr6_2024_pi.g1282_itr6_2024_pi.g1282.t1.2.57f6923d, itr6_2024_pi.g1282_itr6_2024_pi.g1282.t1.1.57f6923d
OG0001186	CSbapl.84384, CSbapl.83693	itr6_5902_pi.g333_itr6_5902_pi.g333.t1.1.57f69241, itr6_5902_pi.g333_itr6_5902_pi.g333.t1
OG0001187	CSbapl.84322, CSbapl.84325, CSbapl.84317	itr6_3058_pi.g1695_itr6_3058_pi.g1695.t1
OG0001188	CSbapl.85766, CSbapl.85755	itr6_6920_pi.g109_itr6_6920_pi.g109.t1, itr6_6244_pi.g362_itr6_6244_pi.g362.t1
OG0001189	CSbapl.86394	itr6_1359_pi.g936_itr6_1359_pi.g936.t1.1.57f6923c, itr6_1359_pi.g936_itr6_1359_pi.g936.t1.2.57f6923c, itr6_1359_pi.g936_itr6_1359_pi.g936.t1
OG0001190	CSbapl.86623	itr6_4765_pi.g1455_itr6_4765_pi.g1455.t1, itr6_4765_pi.g1455_itr6_4765_pi.g1455.t1.2.57f69240, itr6_4765_pi.g1455_itr6_4765_pi.g1455.t1.1.57f69240
OG0001193	CSbapl.893	itr6_4326_pi.g924_itr6_4326_pi.g924.t1.2.57f69240, itr6_4326_pi.g924_itr6_4326_pi.g924.t1, itr6_4326_pi.g924_itr6_4326_pi.g924.t1.1.57f69240
OG0001194	CSbapl.89542	itr6_1338_pi.g690_itr6_1338_pi.g690.t1, itr6_435_pil.g1543_itr6_435_pil.g1543.t1, itr6_3103_pi.g2147_itr6_3103_pi.g2147.t1
OG0001195	CSbapl.89922	itr6_5980_pi.g588_itr6_5980_pi.g588.t1.2.57f69241, itr6_5980_pi.g588_itr6_5980_pi.g588.t1.1.57f69241, itr6_5980_pi.g588_itr6_5980_pi.g588.t1
OG0001196	CSbapl.91823	itr6_137_pil.g1762_itr6_137_pil.g1762.t1, itr6_137_pil.g1762_itr6_137_pil.g1762.t1.2.57f6923c, itr6_137_pil.g1762_itr6_137_pil.g1762.t1.1.57f6923c
OG0001197	CSbapl.91834	itr6_3634_pi.g788_itr6_3634_pi.g788.t1.2.57f6923f, itr6_3634_pi.g788_itr6_3634_pi.g788.t1, itr6_3634_pi.g788_itr6_3634_pi.g788.t1.1.57f6923f
OG0001198	CSbapl.92201	itr6_3226_pi.g131_itr6_3226_pi.g132_itr6_3226_pi.g131.t1_itr6_3226_pi.g132.t1, itr6_3226_pi.g131_itr6_3226_pi.g132_itr6_3226_pi.g131.t1_itr6_3226_pi.g132.t1.1.57f6f333, itr6_3226_pi.g131_itr6_3226_pi.g132_itr6_3226_pi.g131.t1_itr6_3226_pi.g132.t1.2.57f6f333
OG0001199	CSbapl.92287	itr6_2040_pi.g1550_itr6_2040_pi.g1550.t1.1.57f6923d, itr6_2040_pi.g1550_itr6_2040_pi.g1550.t1, itr6_2040_pi.g1550_itr6_2040_pi.g1550.t1.1.57f6923d.1.57f6f331
OG0001201	CSbapl.93495	itr6_1454_pi.g2191_itr6_1454_pi.g2191.t1.2.57f6923c, itr6_1454_pi.g2191_itr6_1454_pi.g2191.t1.1.57f6923c, itr6_1454_pi.g2191_itr6_1454_pi.g2191.t1
OG0001203	CSbapl.94392, CSbapl.94414	itr6_2399_pi.g1641_itr6_2399_pi.g1641.t1.1.57f6f332, itr6_2399_pi.g1641_itr6_2399_pi.g1641.t1
OG0001204	CSbapl.94430	itr6_707_pil.g1039_itr6_707_pil.g1039.t1.2.57f69241, itr6_707_pil.g1039_itr6_707_pil.g1039.t1.1.57f69241, itr6_707_pil.g1039_itr6_707_pil.g1039.t1.3.57f69241
OG0001205	CSbapl.95113	itr6_3475_pi.g2174_itr6_3475_pi.g2174.t1.1.57f6923f, itr6_3475_pi.g2174_itr6_3475_pi.g2174.t1.2.57f6923f, itr6_3475_pi.g2174_itr6_3475_pi.g2174.t1.3.57f6923f
OG0001207	CSbapl.9691	itr6_3819_pi.g2230_itr6_3819_pi.g2230.t1.1.57f6923f, itr6_3819_pi.g2230_itr6_3819_pi.g2230.t1.2.57f6923f, itr6_3819_pi.g2230_itr6_3819_pi.g2230.t1
OG0001208	CSbapl.96961	itr6_1372_pi.g1152_itr6_1372_pi.g1152.t1, itr6_1937_pi.g130_itr6_1937_pi.g130.t1, itr6_2489_pi.g2671_itr6_2489_pi.g2671.t1
OG0001210	CSbapl.98777, CSbapl.98770, CSbapl.98779	itr6_3926_pi.g547_itr6_3926_pi.g547.t1
OG0001211	CSbapl.99293, CSbapl.99296	itr6_3807_pi.g2113_itr6_3807_pi.g2113.t1, itr6_3807_pi.g2115_itr6_3807_pi.g2115.t1
OG0001212	CSbapl.99420	itr6_9466_pi.g118_itr6_9466_pi.g118.t1, itr6_1461_pi.g2356_itr6_1461_pi.g2356.t1, itr6_6770_pi.g17_itr6_6770_pi.g17.t1
OG0001436	CSbapl.100267, CSbapl.100295	itr6_2439_pi.g1976_itr6_2439_pi.g1976.t1
OG0001438	CSbapl.10040, CSbapl.10083	itr6_349_pil.g329_itr6_349_pil.g329.t1
OG0001440	CSbapl.100445	itr6_1946_pi.g317_itr6_1946_pi.g317.t1, itr6_1946_pi.g315_itr6_1946_pi.g315.t1
OG0001441	CSbapl.100467	itr6_2630_pi.g630_itr6_2630_pi.g630.t1, itr6_2309_pi.g743_itr6_2309_pi.g743.t1
OG0001442	CSbapl.100482	itr6_1932_pi.g66_itr6_1932_pi.g66.t1.1.57f6923d, itr6_1932_pi.g66_itr6_1932_pi.g66.t1
OG0001443	CSbapl.100507, CSbapl.100515	itr6_15674_p.g166_itr6_15674_p.g167_itr6_15674_p.g166.t1_itr6_15674_p.g167.t1
OG0001450	CSbapl.101029, CSbapl.101003	itr6_4093_pi.g1343_itr6_4093_pi.g1343.t1
OG0001454	CSbapl.101126, CSbapl.38798	itr6_15091_p.g3_itr6_15091_p.g3.t1
OG0001460	CSbapl.101255, CSbapl.56086	itr6_487_pil.g2247_itr6_487_pil.g2247.t1
OG0001462	CSbapl.10214, CSbapl.10221	itr6_1076_pi.g1559_itr6_1076_pi.g1559.t1
OG0001463	CSbapl.10222, CSbapl.10271	itr6_4720_pi.g1185_itr6_4720_pi.g1185.t1
OG0001465	CSbapl.10297	itr6_13182_p.g16_itr6_13182_p.g16.t1.1.57f6923b, itr6_13182_p.g16_itr6_13182_p.g16.t1
OG0001467	CSbapl.10329, CSbapl.10330	itr6_1456_pi.g2263_itr6_1456_pi.g2263.t1
OG0001471	CSbapl.10481, CSbapl.10470	itr6_12673_p.g101_itr6_12673_p.g101.t1
OG0001479	CSbapl.10835, CSbapl.10792	itr6_2468_pi.g2376_itr6_2468_pi.g2376.t1
OG0001481	CSbapl.10859, CSbapl.10860	itr6_1032_pi.g932_itr6_1032_pi.g932.t1
OG0001482	CSbapl.10954	itr6_3776_pi.g1876_itr6_3776_pi.g1876.t1.1.57f6923f, itr6_3776_pi.g1876_itr6_3776_pi.g1876.t1
OG0001483	CSbapl.11001, CSbapl.15527	itr6_98_pilo.g1374_itr6_98_pilo.g1374.t1
OG0001485	CSbapl.11207, CSbapl.11193	itr6_1932_pi.g93_itr6_1932_pi.g93.t1
OG0001497	CSbapl.1166, CSbapl.1227	itr6_196_pil.g2450_itr6_196_pil.g2450.t1
OG0001500	CSbapl.11700, CSbapl.11710	itr6_3828_pi.g2303_itr6_3828_pi.g2303.t1
OG0001501	CSbapl.11752	itr6_3577_pi.g368_itr6_3577_pi.g368.t1, itr6_3577_pi.g368_itr6_3577_pi.g368.t1.1.57f6923f
OG0001506	CSbapl.11876	itr6_2910_pi.g204_itr6_2910_pi.g204.t1.1.57f6923e, itr6_2910_pi.g204_itr6_2910_pi.g204.t1
OG0001509	CSbapl.11969, CSbapl.11930	itr6_1446_pi.g2078_itr6_1446_pi.g2078.t1
OG0001510	CSbapl.11989, CSbapl.12027	itr6_2666_pi.g1117_itr6_2666_pi.g1117.t1
OG0001511	CSbapl.11990, CSbapl.12026	itr6_2985_pi.g874_itr6_2985_pi.g874.t1
OG0001513	CSbapl.12048	itr6_3307_pi.g761_itr6_3307_pi.g761.t1, itr6_3307_pi.g761_itr6_3307_pi.g761.t1.1.57f6923f
OG0001514	CSbapl.12115	itr6_13358_p.g147_itr6_13358_p.g147.t1, itr6_1985_pi.g808_itr6_1985_pi.g808.t1
OG0001516	CSbapl.12452, CSbapl.12777	itr6_3016_pi.g1261_itr6_3016_pi.g1261.t1
OG0001517	CSbapl.1246	itr6_3043_pi.g1544_itr6_3043_pi.g1544.t1, itr6_3043_pi.g1544_itr6_3043_pi.g1544.t1.1.57f6923e
OG0001520	CSbapl.12606, CSbapl.12657	itr6_1942_pi.g209_itr6_1942_pi.g209.t1
OG0001535	CSbapl.13648, CSbapl.13629	itr6_703_pil.g943_itr6_703_pil.g943.t1
OG0001536	CSbapl.13654	itr6_3169_pi.g2667_itr6_3169_pi.g2667.t1, itr6_3169_pi.g2667_itr6_3169_pi.g2667.t1.1.57f6923e
OG0001537	CSbapl.13716	itr6_2868_pi.g3043_itr6_2868_pi.g3043.t1, itr6_2868_pi.g3043_itr6_2868_pi.g3043.t1.1.57f6923e
OG0001540	CSbapl.13791	itr6_1069_pi.g1471_itr6_1069_pi.g1471.t1.1.57f6923b, itr6_1069_pi.g1471_itr6_1069_pi.g1471.t1
OG0001542	CSbapl.1403, CSbapl.1429	itr6_2664_pi.g1060_itr6_2664_pi.g1060.t1
OG0001551	CSbapl.14867	itr6_1192_pi.g2853_itr6_1192_pi.g2853.t1.1.57f6923b, itr6_1192_pi.g2853_itr6_1192_pi.g2853.t1
OG0001555	CSbapl.15161	itr6_1533_pi.g3138_itr6_1533_pi.g3138.t1, itr6_1533_pi.g3138_itr6_1533_pi.g3138.t1.1.57f6923c
OG0001556	CSbapl.15162, CSbapl.15168	itr6_3755_pi.g1722_itr6_3755_pi.g1722.t1
OG0001559	CSbapl.15321, CSbapl.15323	itr6_1933_pi.g103_itr6_1933_pi.g103.t1
OG0001561	CSbapl.15371, CSbapl.15411	itr6_17598_p.g156_itr6_17598_p.g156.t1
OG0001562	CSbapl.15417, CSbapl.15379	itr6_2619_pi.g465_itr6_2619_pi.g465.t1
OG0001564	CSbapl.15608	itr6_4083_pi.g1298_itr6_4083_pi.g1298.t1.1.57f69240, itr6_4083_pi.g1298_itr6_4083_pi.g1298.t1
OG0001565	CSbapl.15774	itr6_2636_pi.g708_itr6_2636_pi.g708.t1, itr6_2636_pi.g708_itr6_2636_pi.g708.t1.1.57f6923e
OG0001566	CSbapl.15806	itr6_1390_pi.g1325_itr6_1390_pi.g1326_itr6_1390_pi.g1325.t1_itr6_1390_pi.g1326.t1, itr6_1390_pi.g1325_itr6_1390_pi.g1326_itr6_1390_pi.g1325.t1_itr6_1390_pi.g1326.t1.1.57f6f330
OG0001570	CSbapl.82934, CSbapl.15978	itr6_1747_pi.g1700_itr6_1747_pi.g1700.t1
OG0001571	CSbapl.15984, CSbapl.15982	itr6_5143_pi.g21_itr6_5143_pi.g21.t1
OG0001573	CSbapl.16085	itr6_8446_pi.g85_itr6_8446_pi.g85.t1, itr6_8446_pi.g85_itr6_8446_pi.g85.t1.1.57f69242
OG0001577	CSbapl.16700	itr6_2872_pi.g3068_itr6_2872_pi.g3068.t1, itr6_2872_pi.g3069_itr6_2872_pi.g3069.t1
OG0001579	CSbapl.16801	itr6_692_pil.g729_itr6_692_pil.g729.t1.2.57f69241, itr6_4912_pi.g570_itr6_4912_pi.g570.t1
OG0001581	CSbapl.16907	itr6_1190_pi.g2817_itr6_1190_pi.g2817.t1, itr6_1190_pi.g2817_itr6_1190_pi.g2817.t1.1.57f6923b
OG0001583	CSbapl.17036	itr6_1432_pi.g1834_itr6_1432_pi.g1834.t1.1.57f6923c, itr6_1432_pi.g1834_itr6_1432_pi.g1834.t1
OG0001585	CSbapl.57481, CSbapl.17131	itr6_2027_pi.g1307_itr6_2027_pi.g1307.t1
OG0001589	CSbapl.1735	itr6_3372_pi.g1354_itr6_3372_pi.g1354.t1, itr6_3372_pi.g1354_itr6_3372_pi.g1354.t1.1.57f6923f
OG0001590	CSbapl.17505, CSbapl.17483	itr6_3608_pi.g569_itr6_3608_pi.g569.t1
OG0001591	CSbapl.48891, CSbapl.17519	itr6_4147_pi.g1679_itr6_4147_pi.g1679.t1
OG0001593	CSbapl.17530	itr6_1058_pi.g1287_itr6_1058_pi.g1287.t1.1.57f6923b, itr6_1058_pi.g1287_itr6_1058_pi.g1287.t1
OG0001594	CSbapl.17575, CSbapl.17576	itr6_2378_pi.g1469_itr6_2378_pi.g1469.t1
OG0001597	CSbapl.17645, CSbapl.34637	itr6_4505_pi.g45_itr6_4505_pi.g45.t1
OG0001603	CSbapl.18037	itr6_1799_pi.g2377_itr6_1799_pi.g2377.t1, itr6_1799_pi.g2377_itr6_1799_pi.g2377.t1.1.57f6923c
OG0001604	CSbapl.18044	itr6_4957_pi.g739_itr6_4957_pi.g739.t1.1.57f69240, itr6_4957_pi.g739_itr6_4957_pi.g739.t1
OG0001605	CSbapl.18177, CSbapl.18182	itr6_3068_pi.g1835_itr6_3068_pi.g1835.t1
OG0001607	CSbapl.1844, CSbapl.1896	itr6_361_pil.g537_itr6_361_pil.g537.t1
OG0001611	CSbapl.1866	itr6_3438_pi.g1875_itr6_3438_pi.g1875.t1, itr6_3438_pi.g1875_itr6_3438_pi.g1875.t1.1.57f6923f
OG0001614	CSbapl.188	itr6_3313_pi.g824_itr6_3313_pi.g824.t1, itr6_3313_pi.g824_itr6_3313_pi.g824.t1.1.57f6923f
OG0001615	CSbapl.18888	itr6_1783_pi.g2181_itr6_1783_pi.g2181.t1, itr6_1783_pi.g2181_itr6_1783_pi.g2181.t1.1.57f6923c
OG0001624	CSbapl.1939	itr6_2049_pi.g1635_itr6_2049_pi.g1635.t1.1.57f6923d, itr6_2049_pi.g1635_itr6_2049_pi.g1635.t1
OG0001625	CSbapl.19468	itr6_777_pil.g1901_itr6_777_pil.g1901.t1.1.57f69242, itr6_777_pil.g1901_itr6_777_pil.g1901.t1
OG0001627	CSbapl.19627	itr6_795_pil.g2123_itr6_795_pil.g2123.t1.1.57f69242, itr6_795_pil.g2123_itr6_795_pil.g2123.t1
OG0001631	CSbapl.96318, CSbapl.19934	itr6_1429_pi.g1816_itr6_1429_pi.g1816.t1
OG0001634	CSbapl.20012, CSbapl.19983	itr6_3532_pi.g4_itr6_3532_pi.g4.t1
OG0001637	CSbapl.20197	itr6_2695_pi.g1353_itr6_2695_pi.g1353.t1, itr6_3610_pi.g578_itr6_3610_pi.g578.t1
OG0001642	CSbapl.2067, CSbapl.2094	itr6_1677_pi.g821_itr6_1677_pi.g821.t1
OG0001644	CSbapl.20703	itr6_1722_pi.g1276_itr6_1722_pi.g1276.t1.1.57f6923c, itr6_1722_pi.g1276_itr6_1722_pi.g1276.t1
OG0001647	CSbapl.20751	itr6_5288_pi.g467_itr6_5288_pi.g467.t1, itr6_5288_pi.g467_itr6_5288_pi.g467.t1.1.57f69241
OG0001650	CSbapl.20915, CSbapl.20909	itr6_16182_p.g74_itr6_16182_p.g74.t1
OG0001652	CSbapl.21039, CSbapl.21010	itr6_1814_pi.g2534_itr6_1814_pi.g2534.t1
OG0001656	CSbapl.2161, CSbapl.2127	itr6_11591_p.g31_itr6_11591_p.g31.t1
OG0001660	CSbapl.21528, CSbapl.95945	itr6_1059_pi.g1309_itr6_1059_pi.g1309.t1
OG0001663	CSbapl.2167	itr6_2078_pi.g2122_itr6_2078_pi.g2122.t1, itr6_3814_pi.g2154_itr6_3814_pi.g2154.t1
OG0001675	CSbapl.22759, CSbapl.22739	itr6_2032_pi.g1420_itr6_2032_pi.g1420.t1
OG0001678	CSbapl.229	itr6_3424_pi.g1722_itr6_3424_pi.g1722.t1, itr6_3424_pi.g1722_itr6_3424_pi.g1722.t1.1.57f6923f
OG0001679	CSbapl.22905, CSbapl.22911	itr6_7783_pi.g79_itr6_7783_pi.g79.t1
OG0001682	CSbapl.23114, CSbapl.23112	itr6_11792_p.g149_itr6_11792_p.g149.t1
OG0001684	CSbapl.23252, CSbapl.23277	itr6_4139_pi.g1635_itr6_4139_pi.g1635.t1
OG0001688	CSbapl.23762, CSbapl.23761	itr6_1464_pi.g2386_itr6_1464_pi.g2386.t1
OG0001690	CSbapl.23966, CSbapl.23956	itr6_461_pil.g1898_itr6_461_pil.g1898.t1
OG0001692	CSbapl.2411	itr6_186_pil.g2331_itr6_186_pil.g2331.t1, itr6_22_pilo.g395_itr6_22_pilo.g395.t1
OG0001693	CSbapl.24203, CSbapl.24211	itr6_5613_pi.g465_itr6_5613_pi.g465.t1
OG0001694	CSbapl.24254, CSbapl.24255	itr6_4631_pi.g671_itr6_4631_pi.g671.t1
OG0001699	CSbapl.46765, CSbapl.24901	itr6_10529_p.g202_itr6_10529_p.g202.t1
OG0001700	CSbapl.44529, CSbapl.24933	itr6_3204_pi.g2908_itr6_3204_pi.g2908.t1
OG0001709	CSbapl.26143, CSbapl.26146	itr6_8524_pi.g133_itr6_8524_pi.g133.t1
OG0001710	CSbapl.26164	itr6_3417_pi.g1652_itr6_3417_pi.g1652.t1.1.57f6923f, itr6_3417_pi.g1652_itr6_3417_pi.g1652.t1
OG0001715	CSbapl.26792	itr6_2355_pi.g1246_itr6_2355_pi.g1246.t1, itr6_2355_pi.g1246_itr6_2355_pi.g1246.t1.1.57f6923d
OG0001716	CSbapl.26879, CSbapl.26886	itr6_4607_pi.g512_itr6_4607_pi.g512.t1
OG0001717	CSbapl.81484, CSbapl.2710	itr6_2322_pi.g858_itr6_2322_pi.g858.t1
OG0001720	CSbapl.27234	itr6_1432_pi.g1875_itr6_1432_pi.g1875.t1, itr6_1432_pi.g1875_itr6_1432_pi.g1875.t1.1.57f6923c
OG0001721	CSbapl.27269	itr6_5626_pi.g532_itr6_5626_pi.g532.t1.1.57f6f336, itr6_5626_pi.g532_itr6_5626_pi.g532.t1
OG0001734	CSbapl.27923, CSbapl.27824	itr6_2326_pi.g900_itr6_2326_pi.g900.t1
OG0001736	CSbapl.27864	itr6_2500_pi.g2762_itr6_2500_pi.g2762.t1, itr6_2500_pi.g2762_itr6_2500_pi.g2762.t1.1.57f6923e
OG0001737	CSbapl.2822, CSbapl.2793	itr6_231_pil.g2865_itr6_231_pil.g2865.t1
OG0001743	CSbapl.2817	itr6_139_pil.g1768_itr6_139_pil.g1768.t1, itr6_139_pil.g1768_itr6_139_pil.g1768.t1.1.57f6923c
OG0001748	CSbapl.28364, CSbapl.28359	itr6_1962_pi.g529_itr6_1962_pi.g529.t1
OG0001749	CSbapl.28386	itr6_4746_pi.g1329_itr6_4746_pi.g1332_itr6_4746_pi.g1329.t1_itr6_4746_pi.g1332.t1, itr6_4746_pi.g1329_itr6_4746_pi.g1332_itr6_4746_pi.g1329.t1_itr6_4746_pi.g1332.t1.1.57f6f335
OG0001750	CSbapl.28585, CSbapl.28501	itr6_2908_pi.g186_itr6_2908_pi.g186.t1
OG0001751	CSbapl.28618, CSbapl.28590	itr6_10046_p.g80_itr6_10046_p.g80.t1
OG0001752	CSbapl.28684, CSbapl.28712	itr6_2511_pi.g2915_itr6_2511_pi.g2915.t1
OG0001753	CSbapl.28763, CSbapl.28762	itr6_1195_pi.g2896_itr6_1195_pi.g2896.t1
OG0001763	CSbapl.29358, CSbapl.29356	itr6_1292_pi.g65_itr6_1292_pi.g65.t1
OG0001764	CSbapl.29470	itr6_1795_pi.g2329_itr6_1795_pi.g2329.t1.1.57f6923c, itr6_1795_pi.g2329_itr6_1795_pi.g2329.t1
OG0001768	CSbapl.2980	itr6_2168_pi.g3118_itr6_2168_pi.g3118.t1.2.57f6923d, itr6_2168_pi.g3118_itr6_2168_pi.g3118.t1.1.57f6923d
OG0001773	CSbapl.29916, CSbapl.29914	itr6_1774_pi.g2018_itr6_1774_pi.g2018.t1
OG0001774	CSbapl.29924	itr6_1639_pi.g383_itr6_1639_pi.g383.t1, itr6_1731_pi.g1434_itr6_1731_pi.g1434.t1
OG0001779	CSbapl.302	itr6_2594_pi.g249_itr6_2594_pi.g249.t1.1.57f6923e, itr6_2594_pi.g249_itr6_2594_pi.g249.t1
OG0001781	CSbapl.30402, CSbapl.30404	itr6_15_pilo.g276_itr6_15_pilo.g276.t1
OG0001786	CSbapl.30576	itr6_3418_pi.g1670_itr6_3418_pi.g1670.t1, itr6_1088_pi.g1657_itr6_1088_pi.g1657.t1
OG0001796	CSbapl.30940, CSbapl.95185	itr6_8194_pi.g101_itr6_8194_pi.g101.t1
OG0001799	CSbapl.70548, CSbapl.31098	itr6_393_pil.g1036_itr6_393_pil.g1036.t1
OG0001802	CSbapl.3165, CSbapl.3127	itr6_3964_pi.g802_itr6_3964_pi.g802.t1
OG0001803	CSbapl.3167, CSbapl.3128	itr6_692_pil.g702_itr6_692_pil.g702.t1
OG0001804	CSbapl.31299, CSbapl.31297	itr6_3448_pi.g1991_itr6_3448_pi.g1991.t1
OG0001806	CSbapl.31401	itr6_1733_pi.g1469_itr6_1733_pi.g1469.t1, itr6_1733_pi.g1472_itr6_1733_pi.g1472.t1
OG0001811	CSbapl.32969, CSbapl.32034	itr6_2142_pi.g2848_itr6_2142_pi.g2848.t1
OG0001812	CSbapl.32127, CSbapl.46294	itr6_5421_pi.g951_itr6_5421_pi.g951.t1
OG0001813	CSbapl.32197, CSbapl.32198	itr6_821_pil.g2575_itr6_821_pil.g2575.t1
OG0001814	CSbapl.32211	itr6_3485_pi.g2249_itr6_3485_pi.g2249.t1.1.57f6923f, itr6_3485_pi.g2249_itr6_3485_pi.g2249.t1
OG0001815	CSbapl.32260, CSbapl.74543	itr6_236_pil.g2973_itr6_236_pil.g2973.t1
OG0001817	CSbapl.32265, CSbapl.32349	itr6_3919_pi.g498_itr6_3919_pi.g498.t1
OG0001823	CSbapl.325	itr6_3150_pi.g2493_itr6_3150_pi.g2493.t1, itr6_2269_pi.g219_itr6_2269_pi.g219.t1
OG0001824	CSbapl.32543	itr6_16271_p.g116_itr6_16271_p.g116.t1, itr6_9151_pi.g125_itr6_9151_pi.g125.t1
OG0001825	CSbapl.32551	itr6_2757_pi.g2019_itr6_2757_pi.g2019.t1.1.57f6923e, itr6_2757_pi.g2019_itr6_2757_pi.g2019.t1
OG0001826	CSbapl.32552	itr6_2757_pi.g2018_itr6_2757_pi.g2018.t1, itr6_2757_pi.g2018_itr6_2757_pi.g2018.t1.1.57f6923e
OG0001829	CSbapl.32693, CSbapl.32685	itr6_510_pil.g2576_itr6_510_pil.g2576.t1
OG0001830	CSbapl.32745	itr6_388_pil.g929_itr6_388_pil.g929.t1, itr6_388_pil.g928_itr6_388_pil.g928.t1
OG0001840	CSbapl.33417	itr6_12581_p.g37_itr6_12581_p.g37.t1, itr6_12581_p.g37_itr6_12581_p.g37.t1.1.57f6923b
OG0001842	CSbapl.33604	itr6_1329_pi.g549_itr6_1329_pi.g549.t1, itr6_1329_pi.g545_itr6_1329_pi.g545.t1
OG0001843	CSbapl.33621	itr6_2801_pi.g2463_itr6_2801_pi.g2463.t1, itr6_16473_p.g75_itr6_16473_p.g75.t1
OG0001847	CSbapl.34168, CSbapl.34276	itr6_1970_pi.g638_itr6_1970_pi.g638.t1
OG0001848	CSbapl.34172, CSbapl.34275	itr6_3742_pi.g1615_itr6_3742_pi.g1615.t1
OG0001851	CSbapl.34586	itr6_9141_pi.g116_itr6_9141_pi.g116.t1, itr6_9141_pi.g116_itr6_9141_pi.g116.t1.1.57f69242
OG0001855	CSbapl.35036, CSbapl.35196	itr6_4323_pi.g908_itr6_4323_pi.g908.t1
OG0001859	CSbapl.3537	itr6_499_pil.g2459_itr6_499_pil.g2459.t1.1.57f69240, itr6_499_pil.g2459_itr6_499_pil.g2459.t1
OG0001861	CSbapl.35610, CSbapl.35639	itr6_15275_p.g142_itr6_15275_p.g142.t1
OG0001867	CSbapl.42953, CSbapl.35921	itr6_2056_pi.g1755_itr6_2056_pi.g1755.t1
OG0001868	CSbapl.35937	itr6_1353_pi.g863_itr6_1353_pi.g863.t1.1.57f6923c, itr6_1353_pi.g863_itr6_1353_pi.g863.t1
OG0001869	CSbapl.36033	itr6_3835_pi.g2363_itr6_3835_pi.g2363.t1, itr6_3835_pi.g2366_itr6_3835_pi.g2366.t1
OG0001872	CSbapl.36191	itr6_1975_pi.g686_itr6_1975_pi.g686.t1.2.57f6923d, itr6_1975_pi.g686_itr6_1975_pi.g686.t1.1.57f6923d
OG0001875	CSbapl.36349	itr6_1780_pi.g2150_itr6_1780_pi.g2150.t1.1.57f6923c, itr6_1780_pi.g2150_itr6_1780_pi.g2150.t1
OG0001876	CSbapl.36571	itr6_5753_pi.g1005_itr6_5753_pi.g1005.t1, itr6_5458_pi.g4_itr6_5458_pi.g4.t1
OG0001878	CSbapl.36658, CSbapl.36672	itr6_6125_pi.g74_itr6_6125_pi.g74.t1
OG0001881	CSbapl.3672	itr6_3544_pi.g77_itr6_3544_pi.g77.t1.1.57f6923f, itr6_3544_pi.g77_itr6_3544_pi.g77.t1
OG0001886	CSbapl.371	itr6_2735_pi.g1785_itr6_2735_pi.g1785.t1, itr6_2735_pi.g1785_itr6_2735_pi.g1785.t1.1.57f6923e
OG0001889	CSbapl.37250	itr6_1805_pi.g2443_itr6_1805_pi.g2443.t1, itr6_1805_pi.g2449_itr6_1805_pi.g2449.t1
OG0001891	CSbapl.37511	itr6_1451_pi.g2179_itr6_1451_pi.g2179.t1.1.57f6923c, itr6_1451_pi.g2179_itr6_1451_pi.g2179.t1
OG0001896	CSbapl.37877	itr6_1113_pi.g2033_itr6_1113_pi.g2033.t1, itr6_1301_pi.g154_itr6_1301_pi.g154.t1
OG0001897	CSbapl.51487, CSbapl.37892	itr6_3542_pi.g57_itr6_3542_pi.g57.t1
OG0001898	CSbapl.37959	itr6_3365_pi.g1254_itr6_3365_pi.g1254.t1, itr6_3365_pi.g1254_itr6_3365_pi.g1254.t1.1.57f6923f.1.57f6f333
OG0001899	CSbapl.38092	itr6_1966_pi.g554_itr6_1966_pi.g554.t1, itr6_1966_pi.g552_itr6_1966_pi.g552.t1
OG0001901	CSbapl.38215	itr6_656_pil.g188_itr6_656_pil.g188.t1, itr6_656_pil.g189_itr6_656_pil.g189.t1
OG0001904	CSbapl.38595	itr6_4513_pi.g99_itr6_4513_pi.g99.t1.1.57f69240, itr6_4513_pi.g99_itr6_4513_pi.g99.t1
OG0001906	CSbapl.38660	itr6_2036_pi.g1460_itr6_2036_pi.g1460.t1, itr6_4317_pi.g874_itr6_4317_pi.g874.t1
OG0001911	CSbapl.38842	itr6_4977_pi.g855_itr6_4977_pi.g855.t1.1.57f69240, itr6_4977_pi.g855_itr6_4977_pi.g855.t1
OG0001913	CSbapl.3886	itr6_3494_pi.g2316_itr6_3494_pi.g2316.t1.1.57f6923f, itr6_3494_pi.g2316_itr6_3494_pi.g2316.t1
OG0001916	CSbapl.39154, CSbapl.39149	itr6_5635_pi.g569_itr6_5635_pi.g569.t1
OG0001918	CSbapl.39252	itr6_5641_pi.g592_itr6_5641_pi.g592.t1, itr6_5641_pi.g592_itr6_5641_pi.g592.t1.1.57f69241
OG0001920	CSbapl.39290, CSbapl.67874	itr6_2316_pi.g803_itr6_2316_pi.g803.t1
OG0001922	CSbapl.3953	itr6_441_pil.g1639_itr6_441_pil.g1637_itr6_441_pil.g1639.t1_itr6_441_pil.g1637.t1.1.57f6f334, itr6_441_pil.g1639_itr6_441_pil.g1637_itr6_441_pil.g1639.t1_itr6_441_pil.g1637.t1
OG0001925	CSbapl.39616, CSbapl.86431	itr6_2356_pi.g1280_itr6_2356_pi.g1280.t1
OG0001930	CSbapl.85190, CSbapl.40298	itr6_1988_pi.g873_itr6_1988_pi.g873.t1
OG0001931	CSbapl.40362, CSbapl.40411	itr6_2278_pi.g362_itr6_2278_pi.g362.t1
OG0001933	CSbapl.85185, CSbapl.40713	itr6_1145_pi.g2319_itr6_1145_pi.g2319.t1
OG0001935	CSbapl.40752	itr6_1800_pi.g2392_itr6_1800_pi.g2392.t1, itr6_1162_pi.g2523_itr6_1162_pi.g2523.t1
OG0001939	CSbapl.40936, CSbapl.41085	itr6_349_pil.g313_itr6_349_pil.g313.t1
OG0001940	CSbapl.41035	itr6_4116_pi.g1496_itr6_4116_pi.g1498_itr6_4116_pi.g1496.t1_itr6_4116_pi.g1498.t1, itr6_4116_pi.g1496_itr6_4116_pi.g1498_itr6_4116_pi.g1496.t1_itr6_4116_pi.g1498.t1.1.57f6f334
OG0001943	CSbapl.41333, CSbapl.75709	itr6_10294_p.g15_itr6_10294_p.g15.t1
OG0001948	CSbapl.41959	itr6_4939_pi.g671_itr6_4939_pi.g671.t1, itr6_4939_pi.g671_itr6_4939_pi.g671.t1.1.57f69240
OG0001951	CSbapl.42334, CSbapl.42349	itr6_3525_pi.g2613_itr6_3525_pi.g2613.t1
OG0001952	CSbapl.42339	itr6_6437_pi.g31_itr6_6437_pi.g31.t1, itr6_6437_pi.g31_itr6_6437_pi.g31.t1.1.57f69241
OG0001953	CSbapl.42340, CSbapl.42344	itr6_6437_pi.g30_itr6_6437_pi.g30.t1
OG0001960	CSbapl.42835, CSbapl.42795	itr6_6055_pi.g784_itr6_6055_pi.g784.t1
OG0001961	CSbapl.42887, CSbapl.42885	itr6_1335_pi.g619_itr6_1335_pi.g619.t1
OG0001964	CSbapl.435	itr6_4571_pi.g369_itr6_4571_pi.g369.t1.1.57f69240, itr6_4571_pi.g369_itr6_4571_pi.g369.t1
OG0001966	CSbapl.43599	itr6_237_pil.g2988_itr6_237_pil.g2988.t1.1.57f6923d, itr6_237_pil.g2988_itr6_237_pil.g2988.t1
OG0001970	CSbapl.43855	itr6_2419_pi.g1806_itr6_2419_pi.g1806.t1, itr6_2419_pi.g1806_itr6_2419_pi.g1806.t1.1.57f6923d
OG0001975	CSbapl.44101	itr6_10057_p.g92_itr6_10057_p.g92.t1.1.57f6f32f, itr6_10057_p.g92_itr6_10057_p.g92.t1
OG0001976	CSbapl.4446, CSbapl.4427	itr6_480_pil.g2166_itr6_480_pil.g2166.t1
OG0001977	CSbapl.44311, CSbapl.44272	itr6_121_pil.g1585_itr6_121_pil.g1585.t1
OG0001979	CSbapl.4436	itr6_154_pil.g1910_itr6_154_pil.g1910.t1, itr6_154_pil.g1909_itr6_154_pil.g1909.t1
OG0001981	CSbapl.44465	itr6_3414_pi.g1633_itr6_3414_pi.g1633.t1.1.57f6923f, itr6_3414_pi.g1633_itr6_3414_pi.g1633.t1
OG0001983	CSbapl.44639	itr6_1335_pi.g623_itr6_1335_pi.g623.t1, itr6_3026_pi.g1380_itr6_3026_pi.g1380.t1
OG0001984	CSbapl.44719	itr6_217_pil.g2707_itr6_217_pil.g2707.t1, itr6_217_pil.g2707_itr6_217_pil.g2707.t1.1.57f6923d
OG0001985	CSbapl.44950	itr6_2758_pi.g2048_itr6_2758_pi.g2048.t1, itr6_2758_pi.g2048_itr6_2758_pi.g2048.t1.1.57f6923e
OG0001986	CSbapl.45100, CSbapl.45093	itr6_2452_pi.g2127_itr6_2452_pi.g2127.t1
OG0001987	CSbapl.45130, CSbapl.45131	itr6_3875_pi.g199_itr6_3875_pi.g199.t1
OG0001988	CSbapl.45160, CSbapl.45141	itr6_679_pil.g462_itr6_679_pil.g462.t1
OG0001989	CSbapl.45157, CSbapl.45145	itr6_3083_pi.g1962_itr6_3083_pi.g1962.t1
OG0001990	CSbapl.45191	itr6_1982_pi.g791_itr6_1982_pi.g791.t1.1.57f6923d, itr6_1982_pi.g791_itr6_1982_pi.g791.t1
OG0001992	CSbapl.45258	itr6_2727_pi.g1682_itr6_2727_pi.g1682.t1, itr6_2422_pi.g1855_itr6_2422_pi.g1855.t1
OG0001994	CSbapl.45389	itr6_544_pil.g3133_itr6_544_pil.g3133.t1, itr6_544_pil.g3133_itr6_544_pil.g3133.t1.1.57f69241
OG0001995	CSbapl.45424, CSbapl.45486	itr6_4697_pi.g1019_itr6_4697_pi.g1019.t1
OG0001996	CSbapl.4642, CSbapl.4581	itr6_6189_pi.g214_itr6_6189_pi.g214.t1
OG0002000	CSbapl.4618, CSbapl.4608	itr6_5729_pi.g896_itr6_5729_pi.g896.t1
OG0002002	CSbapl.46112	itr6_2064_pi.g1935_itr6_2064_pi.g1935.t1.1.57f6923d, itr6_2064_pi.g1935_itr6_2064_pi.g1935.t1
OG0002003	CSbapl.46130	itr6_1797_pi.g2338_itr6_1797_pi.g2338.t1.1.57f6923c, itr6_1797_pi.g2338_itr6_1797_pi.g2338.t1
OG0002005	CSbapl.46270, CSbapl.95041	itr6_2071_pi.g1999_itr6_2071_pi.g1999.t1
OG0002006	CSbapl.463, CSbapl.471	itr6_4402_pi.g1358_itr6_4402_pi.g1358.t1
OG0002007	CSbapl.46332	itr6_182_pil.g2287_itr6_182_pil.g2287.t1.1.57f6923d, itr6_182_pil.g2287_itr6_182_pil.g2287.t1
OG0002009	CSbapl.46365, CSbapl.46381	itr6_4138_pi.g1632_itr6_4138_pi.g1632.t1.1.57f69240
OG0002010	CSbapl.46433, CSbapl.46427	itr6_4903_pi.g531_itr6_4903_pi.g531.t1
OG0002011	CSbapl.46455	itr6_1819_pi.g2612_itr6_1819_pi.g2612.t1, itr6_1819_pi.g2612_itr6_1819_pi.g2612.t1.1.57f6923d
OG0002013	CSbapl.46612, CSbapl.49057	itr6_2256_pi.g113_itr6_2256_pi.g113.t1
OG0002017	CSbapl.75496, CSbapl.4678	itr6_727_pil.g1260_itr6_727_pil.g1260.t1
OG0002018	CSbapl.46853	itr6_665_pil.g303_itr6_665_pil.g303.t1, itr6_665_pil.g302_itr6_665_pil.g302.t1
OG0002021	CSbapl.46977, CSbapl.47612	itr6_6256_pi.g394_itr6_6256_pi.g394.t1
OG0002022	CSbapl.47065, CSbapl.47067	itr6_511_pil.g2585_itr6_511_pil.g2585.t1
OG0002024	CSbapl.47353	itr6_794_pil.g2077_itr6_794_pil.g2077.t1.1.57f69242, itr6_794_pil.g2077_itr6_794_pil.g2077.t1
OG0002026	CSbapl.47510, CSbapl.47509	itr6_210_pil.g2640_itr6_210_pil.g2640.t1
OG0002028	CSbapl.47786, CSbapl.47785	itr6_407_pil.g1188_itr6_407_pil.g1188.t1
OG0002029	CSbapl.47846	itr6_2763_pi.g2096_itr6_2763_pi.g2096.t1.1.57f6923e, itr6_2763_pi.g2096_itr6_2763_pi.g2096.t1
OG0002030	CSbapl.48009	itr6_472_pil.g2016_itr6_472_pil.g2016.t1.1.57f69240, itr6_472_pil.g2016_itr6_472_pil.g2016.t1
OG0002031	CSbapl.48025	itr6_216_pil.g2691_itr6_216_pil.g2691.t1, itr6_216_pil.g2691_itr6_216_pil.g2691.t1.1.57f6923d
OG0002033	CSbapl.48274	itr6_1436_pi.g1916_itr6_1436_pi.g1916.t1.1.57f6923c, itr6_1436_pi.g1916_itr6_1436_pi.g1916.t1
OG0002034	CSbapl.48295, CSbapl.48383	itr6_3007_pi.g1159_itr6_3007_pi.g1159.t1
OG0002037	CSbapl.48587, CSbapl.48625	itr6_2817_pi.g2612_itr6_2817_pi.g2612.t1
OG0002038	CSbapl.48627, CSbapl.48589	itr6_2817_pi.g2617_itr6_2817_pi.g2617.t1
OG0002041	CSbapl.48830	itr6_12855_p.g14_itr6_12855_p.g14.t1, itr6_4165_pi.g1790_itr6_4165_pi.g1790.t1
OG0002042	CSbapl.48974, CSbapl.48972	itr6_6353_pi.g635_itr6_6353_pi.g635.t1
OG0002043	CSbapl.49081	itr6_3368_pi.g1312_itr6_3368_pi.g1312.t1.1.57f6923f, itr6_3368_pi.g1312_itr6_3368_pi.g1312.t1
OG0002047	CSbapl.49739	itr6_160_pil.g2023_itr6_160_pil.g2023.t1.1.57f6923c, itr6_160_pil.g2023_itr6_160_pil.g2023.t1
OG0002048	CSbapl.49813	itr6_2658_pi.g974_itr6_2658_pi.g974.t1, itr6_2658_pi.g974_itr6_2658_pi.g974.t1.1.57f6923e
OG0002049	CSbapl.49930, CSbapl.49928	itr6_745_pil.g1448_itr6_745_pil.g1448.t1
OG0002051	CSbapl.49974	itr6_2065_pi.g1938_itr6_2065_pi.g1938.t1.4.57f6923d, itr6_2065_pi.g1938_itr6_2065_pi.g1938.t1.2.57f6923d
OG0002054	CSbapl.50189	itr6_1205_pi.g2972_itr6_1205_pi.g2972.t1.1.57f6923b, itr6_1205_pi.g2972_itr6_1205_pi.g2972.t1
OG0002056	CSbapl.5038, CSbapl.9759	itr6_1440_pi.g2012_itr6_1440_pi.g2012.t1
OG0002058	CSbapl.50433	itr6_3937_pi.g614_itr6_3937_pi.g614.t1.1.57f6923f, itr6_3937_pi.g614_itr6_3937_pi.g614.t1
OG0002059	CSbapl.50473	itr6_1497_pi.g2717_itr6_1497_pi.g2717.t1, itr6_1497_pi.g2717_itr6_1497_pi.g2717.t1.1.57f6923c
OG0002061	CSbapl.50883, CSbapl.50621	itr6_3810_pi.g2137_itr6_3810_pi.g2137.t1
OG0002063	CSbapl.50688	itr6_1319_pi.g399_itr6_1319_pi.g399.t1.1.57f6923b, itr6_1319_pi.g399_itr6_1319_pi.g399.t1
OG0002065	CSbapl.50891, CSbapl.51031	itr6_745_pil.g1467_itr6_745_pil.g1467.t1
OG0002066	CSbapl.50894, CSbapl.51037	itr6_2457_pi.g2201_itr6_2457_pi.g2201.t1
OG0002067	CSbapl.50923	itr6_5522_pi.g223_itr6_5522_pi.g223.t1, itr6_5522_pi.g223_itr6_5522_pi.g223.t1.1.57f69241
OG0002069	CSbapl.51123	itr6_3933_pi.g601_itr6_3933_pi.g601.t1.1.57f6923f, itr6_3933_pi.g601_itr6_3933_pi.g601.t1
OG0002070	CSbapl.90779, CSbapl.51254	itr6_2470_pi.g2406_itr6_2470_pi.g2406.t1
OG0002071	CSbapl.51259	itr6_5075_pi.g1277_itr6_5075_pi.g1277.t1, itr6_5075_pi.g1281_itr6_5075_pi.g1281.t1
OG0002072	CSbapl.51353, CSbapl.53422	itr6_357_pil.g460_itr6_357_pil.g461_itr6_357_pil.g460.t1_itr6_357_pil.g461.t1
OG0002074	CSbapl.53427, CSbapl.51363	itr6_1714_pi.g1207_itr6_1714_pi.g1207.t1
OG0002075	CSbapl.51367, CSbapl.52968	itr6_2134_pi.g2786_itr6_2134_pi.g2786.t1
OG0002076	CSbapl.5145, CSbapl.5153	itr6_2636_pi.g678_itr6_2636_pi.g678.t1
OG0002077	CSbapl.51502, CSbapl.51498	itr6_5521_pi.g219_itr6_5521_pi.g219.t1
OG0002078	CSbapl.51533	itr6_6113_pi.g40_itr6_6113_pi.g40.t1, itr6_6113_pi.g40_itr6_6113_pi.g40.t1.1.57f69241
OG0002080	CSbapl.51750, CSbapl.51609	itr6_2365_pi.g1341_itr6_2365_pi.g1341.t1
OG0002082	CSbapl.51762	itr6_3626_pi.g707_itr6_3626_pi.g707.t1.1.57f6923f, itr6_3626_pi.g707_itr6_3626_pi.g707.t1
OG0002083	CSbapl.51768, CSbapl.51766	itr6_2058_pi.g1773_itr6_2058_pi.g1773.t1
OG0002085	CSbapl.51893	itr6_490_pil.g2379_itr6_490_pil.g2379.t1.1.57f69240, itr6_490_pil.g2379_itr6_490_pil.g2379.t1
OG0002086	CSbapl.52075, CSbapl.52093	itr6_14820_p.g39_itr6_14820_p.g39.t1
OG0002087	CSbapl.52109	itr6_10416_p.g102_itr6_10416_p.g102.t1, itr6_10416_p.g102_itr6_10416_p.g102.t1.1.57f6923b
OG0002088	CSbapl.52191, CSbapl.52211	itr6_361_pil.g554_itr6_361_pil.g555_itr6_361_pil.g554.t1_itr6_361_pil.g555.t1
OG0002090	CSbapl.52320	itr6_2077_pi.g2094_itr6_2077_pi.g2094.t1, itr6_2077_pi.g2094_itr6_2077_pi.g2094.t1.1.57f6923d
OG0002092	CSbapl.52446	itr6_6341_pi.g595_itr6_6341_pi.g595.t1, itr6_2355_pi.g1223_itr6_2355_pi.g1223.t1
OG0002093	CSbapl.5245, CSbapl.5329	itr6_1846_pi.g2945_itr6_1846_pi.g2945.t1
OG0002094	CSbapl.52505	itr6_4967_pi.g807_itr6_4967_pi.g807.t1.1.57f69240, itr6_4967_pi.g807_itr6_4967_pi.g807.t1
OG0002095	CSbapl.52620, CSbapl.52643	itr6_4081_pi.g1287_itr6_4081_pi.g1287.t1
OG0002097	CSbapl.52845	itr6_1606_pi.g11_itr6_1606_pi.g11.t1, itr6_1606_pi.g11_itr6_1606_pi.g11.t1.1.57f6f330
OG0002098	CSbapl.52932	itr6_4827_pi.g46_itr6_4827_pi.g46.t1, itr6_4827_pi.g46_itr6_4827_pi.g46.t1.1.57f69240
OG0002099	CSbapl.53029	itr6_217_pil.g2716_itr6_217_pil.g2716.t1, itr6_217_pil.g2716_itr6_217_pil.g2716.t1.1.57f6923d
OG0002100	CSbapl.53034	itr6_1755_pi.g1759_itr6_1755_pi.g1759.t1, itr6_1198_pi.g2927_itr6_1198_pi.g2927.t1
OG0002102	CSbapl.53133	itr6_2309_pi.g714_itr6_2309_pi.g714.t1.1.57f6923d, itr6_2309_pi.g714_itr6_2309_pi.g714.t1
OG0002103	CSbapl.53322	itr6_5158_pi.g60_itr6_5158_pi.g60.t1, itr6_5158_pi.g60_itr6_5158_pi.g60.t1.1.57f69241
OG0002106	CSbapl.53486, CSbapl.55107	itr6_233_pil.g2929_itr6_233_pil.g2929.t1
OG0002107	CSbapl.55116, CSbapl.53497	itr6_5260_pi.g371_itr6_5260_pi.g371.t1
OG0002108	CSbapl.54951, CSbapl.53508	itr6_1113_pi.g2032_itr6_1113_pi.g2032.t1
OG0002109	CSbapl.53711	itr6_130_pil.g1678_itr6_130_pil.g1678.t1, itr6_130_pil.g1678_itr6_130_pil.g1678.t1.1.57f6923b
OG0002110	CSbapl.53729	itr6_2035_pi.g1442_itr6_2035_pi.g1442.t1.1.57f6923d, itr6_2035_pi.g1442_itr6_2035_pi.g1442.t1
OG0002111	CSbapl.53885	itr6_681_pil.g522_itr6_681_pil.g522.t1.1.57f69241, itr6_681_pil.g522_itr6_681_pil.g522.t1
OG0002113	CSbapl.54135	itr6_1815_pi.g2572_itr6_1815_pi.g2572.t1, itr6_1815_pi.g2572_itr6_1815_pi.g2572.t1.1.57f6923c
OG0002115	CSbapl.5470, CSbapl.5559	itr6_3157_pi.g2556_itr6_3157_pi.g2556.t1
OG0002117	CSbapl.54839	itr6_1372_pi.g1145_itr6_1372_pi.g1145.t1.1.57f6923c, itr6_1372_pi.g1145_itr6_1372_pi.g1145.t1
OG0002118	CSbapl.54841	itr6_783_pil.g1975_itr6_783_pil.g1975.t1.1.57f69242, itr6_783_pil.g1975_itr6_783_pil.g1975.t1
OG0002120	CSbapl.55627, CSbapl.55580	itr6_1747_pi.g1678_itr6_1747_pi.g1678.t1
OG0002122	CSbapl.55700	itr6_5629_pi.g542_itr6_5629_pi.g542.t1.1.57f69241, itr6_5629_pi.g542_itr6_5629_pi.g542.t1
OG0002124	CSbapl.55727	itr6_348_pil.g308_itr6_348_pil.g308.t1, itr6_348_pil.g308_itr6_348_pil.g308.t1.1.57f6923f
OG0002125	CSbapl.55739	itr6_1521_pi.g3042_itr6_1521_pi.g3042.t1, itr6_779_pil.g1925_itr6_779_pil.g1925.t1
OG0002126	CSbapl.55902	itr6_6207_pi.g248_itr6_6207_pi.g248.t1, itr6_6207_pi.g248_itr6_6207_pi.g248.t1.1.57f69241
OG0002128	CSbapl.56389	itr6_6167_pi.g157_itr6_6167_pi.g157.t1, itr6_6167_pi.g157_itr6_6167_pi.g157.t1.1.57f69241
OG0002129	CSbapl.56475	itr6_2533_pi.g3169_itr6_2533_pi.g3169.t1, itr6_2533_pi.g3169_itr6_2533_pi.g3169.t1.1.57f6923e
OG0002130	CSbapl.75654, CSbapl.56556	itr6_4748_pi.g1339_itr6_4748_pi.g1339.t1
OG0002131	CSbapl.75656, CSbapl.56557	itr6_142_pil.g1806_itr6_142_pil.g1806.t1
OG0002133	CSbapl.5657	itr6_5718_pi.g853_itr6_5718_pi.g853.t1, itr6_5718_pi.g853_itr6_5718_pi.g853.t1.1.57f69241
OG0002134	CSbapl.56614	itr6_1455_pi.g2213_itr6_1455_pi.g2213.t1.1.57f6923c, itr6_1455_pi.g2213_itr6_1455_pi.g2213.t1
OG0002136	CSbapl.56850, CSbapl.56853	itr6_1024_pi.g842_itr6_1024_pi.g842.t1
OG0002137	CSbapl.57206, CSbapl.69684	itr6_438_pil.g1582_itr6_438_pil.g1582.t1
OG0002138	CSbapl.57283	itr6_714_pil.g1119_itr6_714_pil.g1119.t1, itr6_714_pil.g1119_itr6_714_pil.g1119.t1.1.57f6f336
OG0002140	CSbapl.57412, CSbapl.57458	itr6_2086_pi.g2227_itr6_2086_pi.g2227.t1
OG0002141	CSbapl.57467	itr6_356_pil.g401_itr6_356_pil.g401.t1, itr6_356_pil.g401_itr6_356_pil.g401.t1.1.57f6f333
OG0002142	CSbapl.57613, CSbapl.57551	itr6_3467_pi.g2119_itr6_3467_pi.g2119.t1
OG0002144	CSbapl.57643, CSbapl.57624	itr6_518_pil.g2742_itr6_518_pil.g2742.t1
OG0002145	CSbapl.57648, CSbapl.57635	itr6_4896_pi.g482_itr6_4896_pi.g482.t1
OG0002146	CSbapl.57676	itr6_5972_pi.g563_itr6_5972_pi.g563.t1.1.57f69241, itr6_5972_pi.g563_itr6_5972_pi.g563.t1
OG0002149	CSbapl.58278	itr6_1777_pi.g2085_itr6_1777_pi.g2085.t1, itr6_1777_pi.g2082_itr6_1777_pi.g2082.t1
OG0002150	CSbapl.5870, CSbapl.5838	itr6_830_pil.g2726_itr6_830_pil.g2726.t1
OG0002156	CSbapl.58530	itr6_1654_pi.g558_itr6_1654_pi.g558.t1, itr6_1654_pi.g558_itr6_1654_pi.g558.t1.1.57f6923c
OG0002158	CSbapl.58571, CSbapl.58600	itr6_2281_pi.g402_itr6_2281_pi.g402.t1
OG0002159	CSbapl.58598	itr6_6262_pi.g410_itr6_6262_pi.g410.t1, itr6_6262_pi.g410_itr6_6262_pi.g410.t1.1.57f69241
OG0002160	CSbapl.58662	itr6_3166_pi.g2657_itr6_3166_pi.g2657.t1.1.57f6923e, itr6_3166_pi.g2657_itr6_3166_pi.g2657.t1
OG0002161	CSbapl.58818, CSbapl.58733	itr6_1174_pi.g2691_itr6_1174_pi.g2691.t1
OG0002162	CSbapl.58806, CSbapl.58740	itr6_7733_pi.g26_itr6_7733_pi.g26.t1
OG0002163	CSbapl.58842	itr6_771_pil.g1830_itr6_771_pil.g1830.t1, itr6_771_pil.g1830_itr6_771_pil.g1830.t1.1.57f69242
OG0002164	CSbapl.59070	itr6_729_pil.g1283_itr6_729_pil.g1283.t1.1.57f69241, itr6_729_pil.g1283_itr6_729_pil.g1283.t1
OG0002165	CSbapl.59087	itr6_2276_pi.g281_itr6_2276_pi.g281.t1.1.57f6923d, itr6_2276_pi.g281_itr6_2276_pi.g281.t1
OG0002166	CSbapl.59422, CSbapl.59381	itr6_3055_pi.g1659_itr6_3055_pi.g1659.t1
OG0002167	CSbapl.59388	itr6_531_pil.g2966_itr6_531_pil.g2966.t1, itr6_531_pil.g2966_itr6_531_pil.g2966.t1.1.57f69241
OG0002168	CSbapl.62439, CSbapl.59540	itr6_802_pil.g2354_itr6_802_pil.g2354.t1
OG0002169	CSbapl.96415, CSbapl.59649	itr6_3504_pi.g2418_itr6_3504_pi.g2418.t1
OG0002171	CSbapl.67426, CSbapl.59695	itr6_1813_pi.g2516_itr6_1813_pi.g2516.t1
OG0002172	CSbapl.59961	itr6_2517_pi.g2955_itr6_2517_pi.g2955.t1.1.57f6923e, itr6_2517_pi.g2955_itr6_2517_pi.g2955.t1
OG0002173	CSbapl.60027	itr6_2587_pi.g213_itr6_2587_pi.g213.t1.1.57f6923e, itr6_2587_pi.g213_itr6_2587_pi.g213.t1
OG0002175	CSbapl.60136	itr6_842_pil.g2908_itr6_842_pil.g2908.t1, itr6_842_pil.g2908_itr6_842_pil.g2908.t1.1.57f69242
OG0002176	CSbapl.60232	itr6_1987_pi.g837_itr6_1987_pi.g837.t1, itr6_1987_pi.g837_itr6_1987_pi.g837.t1.1.57f6923d
OG0002177	CSbapl.60309, CSbapl.60246	itr6_86_pilo.g1169_itr6_86_pilo.g1169.t1
OG0002178	CSbapl.60343	itr6_45_pilo.g659_itr6_45_pilo.g659.t1.1.57f69240, itr6_45_pilo.g659_itr6_45_pilo.g659.t1
OG0002179	CSbapl.60361	itr6_2005_pi.g1112_itr6_2005_pi.g1114_itr6_2005_pi.g1112.t1_itr6_2005_pi.g1114.t1, itr6_2005_pi.g1112_itr6_2005_pi.g1114_itr6_2005_pi.g1112.t1_itr6_2005_pi.g1114.t1.1.57f6f331
OG0002180	CSbapl.60413	itr6_3285_pi.g600_itr6_3285_pi.g600.t1, itr6_3285_pi.g599_itr6_3285_pi.g599.t1
OG0002181	CSbapl.61282, CSbapl.60593	itr6_1663_pi.g678_itr6_1663_pi.g678.t1
OG0002183	CSbapl.60828, CSbapl.60825	itr6_847_pil.g2994_itr6_847_pil.g2994.t1
OG0002184	CSbapl.61010	itr6_445_pil.g1681_itr6_445_pil.g1681.t1.1.57f69240, itr6_445_pil.g1681_itr6_445_pil.g1681.t1
OG0002186	CSbapl.61539	itr6_1732_pi.g1458_itr6_1732_pi.g1458.t1, itr6_1732_pi.g1458_itr6_1732_pi.g1458.t1.1.57f6923c
OG0002187	CSbapl.61633	itr6_2791_pi.g2337_itr6_2791_pi.g2337.t1.1.57f6923e, itr6_2791_pi.g2337_itr6_2791_pi.g2337.t1
OG0002188	CSbapl.61688	itr6_3118_pi.g2278_itr6_3118_pi.g2278.t1.1.57f6923e, itr6_3118_pi.g2278_itr6_3118_pi.g2278.t1
OG0002192	CSbapl.61905, CSbapl.96162	itr6_14251_p.g65_itr6_14251_p.g65.t1
OG0002193	CSbapl.61990	itr6_1965_pi.g546_itr6_1965_pi.g546.t1, itr6_1940_pi.g181_itr6_1940_pi.g181.t1
OG0002195	CSbapl.62042	itr6_1659_pi.g632_itr6_1659_pi.g632.t1, itr6_1659_pi.g632_itr6_1659_pi.g632.t1.1.57f6923c
OG0002196	CSbapl.62403	itr6_3306_pi.g756_itr6_3306_pi.g756.t1, itr6_2004_pi.g1029_itr6_2004_pi.g1029.t1
OG0002201	CSbapl.63123	itr6_451_pil.g1749_itr6_451_pil.g1749.t1.1.57f69240, itr6_451_pil.g1749_itr6_451_pil.g1749.t1
OG0002203	CSbapl.63443, CSbapl.63425	itr6_1741_pi.g1567_itr6_1741_pi.g1567.t1
OG0002204	CSbapl.63669	itr6_4939_pi.g662_itr6_4939_pi.g662.t1, itr6_6058_pi.g798_itr6_6058_pi.g798.t1
OG0002205	CSbapl.6369, CSbapl.6375	itr6_844_pil.g2977_itr6_844_pil.g2977.t1
OG0002206	CSbapl.63806, CSbapl.63810	itr6_6328_pi.g564_itr6_6328_pi.g564.t1
OG0002211	CSbapl.63987	itr6_983_pil.g267_itr6_983_pil.g267.t1.1.57f69242, itr6_983_pil.g267_itr6_983_pil.g267.t1
OG0002213	CSbapl.64383, CSbapl.64395	itr6_3436_pi.g1817_itr6_3436_pi.g1817.t1
OG0002214	CSbapl.64621	itr6_4714_pi.g1138_itr6_4714_pi.g1138.t1.1.57f69240, itr6_4714_pi.g1138_itr6_4714_pi.g1138.t1
OG0002217	CSbapl.64726, CSbapl.64700	itr6_1315_pi.g379_itr6_1315_pi.g379.t1
OG0002218	CSbapl.64832, CSbapl.64849	itr6_3677_pi.g1157_itr6_3677_pi.g1157.t1
OG0002219	CSbapl.64891, CSbapl.64911	itr6_18313_p.g11_itr6_18313_p.g11.t1
OG0002222	CSbapl.65097, CSbapl.65214	itr6_2497_pi.g2700_itr6_2497_pi.g2700.t1
OG0002223	CSbapl.65127, CSbapl.65132	itr6_2616_pi.g415_itr6_2616_pi.g417_itr6_2616_pi.g415.t1_itr6_2616_pi.g417.t1
OG0002224	CSbapl.65348	itr6_1436_pi.g1923_itr6_1436_pi.g1923.t1, itr6_1436_pi.g1920_itr6_1436_pi.g1920.t1
OG0002228	CSbapl.65735	itr6_1125_pi.g2134_itr6_1125_pi.g2134.t1.1.57f6923b, itr6_1125_pi.g2134_itr6_1125_pi.g2134.t1
OG0002229	CSbapl.65807, CSbapl.65796	itr6_1658_pi.g605_itr6_1658_pi.g605.t1
OG0002230	CSbapl.65798, CSbapl.65804	itr6_1658_pi.g602_itr6_1658_pi.g602.t1
OG0002231	CSbapl.65949	itr6_10489_p.g168_itr6_10489_p.g168.t1.1.57f6923b, itr6_10489_p.g168_itr6_10489_p.g168.t1
OG0002234	CSbapl.6664	itr6_173_pil.g2183_itr6_173_pil.g2183.t1.2.57f6923c, itr6_173_pil.g2183_itr6_173_pil.g2183.t1.1.57f6923c
OG0002239	CSbapl.66874	itr6_6209_pi.g257_itr6_6209_pi.g257.t1.1.57f69241, itr6_6209_pi.g257_itr6_6209_pi.g257.t1
OG0002240	CSbapl.66987	itr6_11474_p.g177_itr6_11474_p.g177.t1, itr6_11474_p.g177_itr6_11474_p.g177.t1.1.57f6923b
OG0002241	CSbapl.6711, CSbapl.6709	itr6_2291_pi.g533_itr6_2291_pi.g533.t1
OG0002242	CSbapl.6712	itr6_2291_pi.g532_itr6_2291_pi.g532.t1, itr6_2291_pi.g532_itr6_2291_pi.g532.t1.1.57f6923d
OG0002244	CSbapl.6731	itr6_5301_pi.g511_itr6_5301_pi.g511.t1, itr6_5301_pi.g511_itr6_5301_pi.g511.t1.1.57f6f335
OG0002245	CSbapl.67348, CSbapl.67341	itr6_218_pil.g2735_itr6_218_pil.g2735.t1
OG0002247	CSbapl.67601	itr6_4933_pi.g627_itr6_4933_pi.g627.t1, itr6_4933_pi.g627_itr6_4933_pi.g627.t1.1.57f69240
OG0002248	CSbapl.67639, CSbapl.67657	itr6_2851_pi.g2917_itr6_2851_pi.g2917.t1
OG0002249	CSbapl.67654, CSbapl.67641	itr6_2851_pi.g2916_itr6_2851_pi.g2916.t1
OG0002252	CSbapl.68121	itr6_7029_pi.g190_itr6_7029_pi.g190.t1.1.57f69241, itr6_7029_pi.g190_itr6_7029_pi.g190.t1
OG0002253	CSbapl.68131	itr6_1838_pi.g2846_itr6_1838_pi.g2849_itr6_1838_pi.g2846.t1_itr6_1838_pi.g2849.t1, itr6_1838_pi.g2846_itr6_1838_pi.g2849_itr6_1838_pi.g2846.t1_itr6_1838_pi.g2849.t1.1.57f6f331
OG0002257	CSbapl.68458	itr6_9268_pi.g223_itr6_9268_pi.g223.t1, itr6_9268_pi.g223_itr6_9268_pi.g223.t1.1.57f69242
OG0002258	CSbapl.68576, CSbapl.68515	itr6_1387_pi.g1294_itr6_1387_pi.g1294.t1
OG0002260	CSbapl.69253	itr6_9577_pi.g243_itr6_9577_pi.g243.t1, itr6_2301_pi.g615_itr6_2301_pi.g615.t1
OG0002261	CSbapl.69348	itr6_752_pil.g1605_itr6_752_pil.g1605.t1, itr6_2586_pi.g175_itr6_2586_pi.g175.t1
OG0002262	CSbapl.69368, CSbapl.69355	itr6_4267_pi.g534_itr6_4267_pi.g534.t1
OG0002263	CSbapl.69759, CSbapl.69761	itr6_1800_pi.g2380_itr6_1800_pi.g2380.t1
OG0002264	CSbapl.69801	itr6_801_pil.g2307_itr6_801_pil.g2307.t1, itr6_801_pil.g2307_itr6_801_pil.g2307.t1.1.57f69242
OG0002268	CSbapl.70090, CSbapl.70098	itr6_5461_pi.g20_itr6_5461_pi.g20.t1
OG0002270	CSbapl.70228	itr6_3840_pi.g2424_itr6_3840_pi.g2424.t1, itr6_3840_pi.g2424_itr6_3840_pi.g2424.t1.1.57f6923f
OG0002272	CSbapl.7044	itr6_383_pil.g826_itr6_383_pil.g826.t1, itr6_383_pil.g826_itr6_383_pil.g826.t1.1.57f6923f
OG0002274	CSbapl.70468, CSbapl.98436	itr6_1772_pi.g2005_itr6_1772_pi.g2005.t1
OG0002275	CSbapl.70500	itr6_2856_pi.g2949_itr6_2856_pi.g2949.t1, itr6_4239_pi.g329_itr6_4239_pi.g329.t1
OG0002277	CSbapl.70801, CSbapl.70826	itr6_15697_p.g184_itr6_15697_p.g184.t1
OG0002280	CSbapl.71060, CSbapl.70984	itr6_327_pil.g43_itr6_327_pil.g43.t1
OG0002283	CSbapl.71202	itr6_5436_pi.g997_itr6_5436_pi.g997.t1.1.57f69241, itr6_5436_pi.g997_itr6_5436_pi.g997.t1
OG0002286	CSbapl.71714, CSbapl.71669	itr6_4713_pi.g1127_itr6_4713_pi.g1127.t1
OG0002295	CSbapl.72544, CSbapl.72517	itr6_4608_pi.g547_itr6_4608_pi.g547.t1
OG0002298	CSbapl.75812, CSbapl.72689	itr6_3916_pi.g479_itr6_3916_pi.g479.t1
OG0002299	CSbapl.729	itr6_5939_pi.g453_itr6_5939_pi.g453.t1, itr6_3449_pi.g2003_itr6_3449_pi.g2003.t1
OG0002300	CSbapl.72904	itr6_11904_p.g9_itr6_11904_p.g9.t1, itr6_9261_pi.g219_itr6_9261_pi.g219.t1
OG0002301	CSbapl.7307, CSbapl.9739	itr6_4421_pi.g1449_itr6_4421_pi.g1449.t1
OG0002305	CSbapl.7356	itr6_2512_pi.g2923_itr6_2512_pi.g2923.t1, itr6_2512_pi.g2923_itr6_2512_pi.g2923.t1.1.57f6923e
OG0002307	CSbapl.7383	itr6_221_pil.g2767_itr6_221_pil.g2767.t1.1.57f6923d, itr6_221_pil.g2767_itr6_221_pil.g2767.t1
OG0002312	CSbapl.74222, CSbapl.74218	itr6_2879_pi.g3186_itr6_2879_pi.g3186.t1
OG0002313	CSbapl.74261, CSbapl.74251	itr6_2473_pi.g2461_itr6_2473_pi.g2461.t1
OG0002314	CSbapl.74252, CSbapl.74262	itr6_14382_p.g149_itr6_14382_p.g149.t1
OG0002315	CSbapl.74304	itr6_4124_pi.g1553_itr6_4124_pi.g1553.t1, itr6_4124_pi.g1551_itr6_4124_pi.g1551.t1
OG0002316	CSbapl.74305	itr6_3036_pi.g1469_itr6_3036_pi.g1469.t1, itr6_3036_pi.g1469_itr6_3036_pi.g1469.t1.1.57f6923e
OG0002317	CSbapl.74306	itr6_3036_pi.g1468_itr6_3036_pi.g1468.t1.1.57f6923e, itr6_3036_pi.g1468_itr6_3036_pi.g1468.t1
OG0002318	CSbapl.74391	itr6_692_pil.g724_itr6_692_pil.g724.t1, itr6_692_pil.g724_itr6_692_pil.g724.t1.1.57f69241
OG0002319	CSbapl.74424, CSbapl.74429	itr6_122_pil.g1595_itr6_122_pil.g1595.t1
OG0002320	CSbapl.7471, CSbapl.7446	itr6_1108_pi.g1926_itr6_1108_pi.g1926.t1
OG0002322	CSbapl.74548	itr6_4237_pi.g319_itr6_4237_pi.g319.t1.1.57f69240, itr6_4237_pi.g319_itr6_4237_pi.g319.t1
OG0002323	CSbapl.74925, CSbapl.74556	itr6_478_pil.g2082_itr6_478_pil.g2082.t1
OG0002327	CSbapl.74927	itr6_4135_pi.g1615_itr6_4135_pi.g1615.t1.1.57f69240, itr6_4135_pi.g1615_itr6_4135_pi.g1615.t1
OG0002328	CSbapl.75139	itr6_2277_pi.g318_itr6_2277_pi.g318.t1, itr6_2277_pi.g318_itr6_2277_pi.g318.t1.1.57f6923d
OG0002329	CSbapl.75142	itr6_192_pil.g2381_itr6_192_pil.g2381.t1, itr6_192_pil.g2381_itr6_192_pil.g2381.t1.1.57f6923d
OG0002331	CSbapl.75166	itr6_2301_pi.g628_itr6_2301_pi.g628.t1, itr6_2301_pi.g628_itr6_2301_pi.g628.t1.1.57f6923d
OG0002332	CSbapl.75249, CSbapl.75244	itr6_2392_pi.g1569_itr6_2392_pi.g1569.t1
OG0002335	CSbapl.75777, CSbapl.86161	itr6_3395_pi.g1542_itr6_3395_pi.g1542.t1
OG0002336	CSbapl.758	itr6_5720_pi.g861_itr6_5720_pi.g861.t1, itr6_5720_pi.g861_itr6_5720_pi.g861.t1.1.57f69241
OG0002337	CSbapl.76154	itr6_4902_pi.g523_itr6_4902_pi.g523.t1.1.57f69240, itr6_4902_pi.g523_itr6_4902_pi.g523.t1
OG0002338	CSbapl.76354, CSbapl.76339	itr6_8038_pi.g4_itr6_8038_pi.g4.t1
OG0002340	CSbapl.76524, CSbapl.76514	itr6_1678_pi.g828_itr6_1678_pi.g828.t1
OG0002341	CSbapl.76613, CSbapl.76612	itr6_5777_pi.g1112_itr6_5777_pi.g1112.t1
OG0002342	CSbapl.77751, CSbapl.76693	itr6_1853_pi.g3045_itr6_1853_pi.g3045.t1
OG0002345	CSbapl.77199	itr6_7109_pi.g51_itr6_7109_pi.g51.t1.1.57f69241, itr6_7109_pi.g51_itr6_7109_pi.g51.t1
OG0002346	CSbapl.77293, CSbapl.77263	itr6_2728_pi.g1694_itr6_2728_pi.g1694.t1
OG0002347	CSbapl.77473, CSbapl.77474	itr6_2891_pi.g32_itr6_2891_pi.g32.t1
OG0002348	CSbapl.77743	itr6_2385_pi.g1500_itr6_2385_pi.g1500.t1.2.57f6923d, itr6_2385_pi.g1500_itr6_2385_pi.g1500.t1.1.57f6923d
OG0002350	CSbapl.77865	itr6_708_pil.g1053_itr6_708_pil.g1053.t1.1.57f69241, itr6_708_pil.g1053_itr6_708_pil.g1053.t1
OG0002351	CSbapl.781	itr6_5284_pi.g452_itr6_5284_pi.g452.t1.1.57f6f335, itr6_5284_pi.g452_itr6_5284_pi.g452.t1
OG0002352	CSbapl.78279, CSbapl.78278	itr6_4464_pi.g1652_itr6_4464_pi.g1652.t1
OG0002353	CSbapl.78309	itr6_6083_pi.g883_itr6_6083_pi.g883.t1, itr6_6083_pi.g883_itr6_6083_pi.g883.t1.1.57f69241
OG0002354	CSbapl.78330	itr6_1337_pi.g670_itr6_1337_pi.g670.t1.1.57f6923c, itr6_1337_pi.g670_itr6_1337_pi.g670.t1.2.57f6923c
OG0002355	CSbapl.78423	itr6_22_pilo.g378_itr6_22_pilo.g378.t1.1.57f6923d, itr6_22_pilo.g378_itr6_22_pilo.g378.t1
OG0002356	CSbapl.78634	itr6_1133_pi.g2182_itr6_1133_pi.g2182.t1, itr6_1133_pi.g2182_itr6_1133_pi.g2182.t1.1.57f6923b
OG0002357	CSbapl.78785	itr6_166_pil.g2098_itr6_166_pil.g2098.t1.1.57f6923c, itr6_166_pil.g2098_itr6_166_pil.g2098.t1
OG0002358	CSbapl.78874	itr6_4762_pi.g1433_itr6_4762_pi.g1433.t1.1.57f69240, itr6_4762_pi.g1433_itr6_4762_pi.g1433.t1
OG0002359	CSbapl.78983	itr6_1629_pi.g292_itr6_1629_pi.g292.t1, itr6_1629_pi.g292_itr6_1629_pi.g292.t1.1.57f6923c
OG0002360	CSbapl.79568, CSbapl.79570	itr6_1407_pi.g1562_itr6_1407_pi.g1562.t1
OG0002362	CSbapl.79850, CSbapl.79844	itr6_9405_pi.g70_itr6_9405_pi.g70.t1
OG0002363	CSbapl.79846, CSbapl.79851	itr6_2908_pi.g183_itr6_2908_pi.g183.t1
OG0002364	CSbapl.80158	itr6_5264_pi.g398_itr6_5264_pi.g398.t1.1.57f69241, itr6_5264_pi.g398_itr6_5264_pi.g398.t1
OG0002366	CSbapl.80260	itr6_3616_pi.g632_itr6_3616_pi.g632.t1, itr6_707_pil.g1023_itr6_707_pil.g1023.t1
OG0002367	CSbapl.8061, CSbapl.8056	itr6_10764_p.g135_itr6_10764_p.g135.t1
OG0002368	CSbapl.80972, CSbapl.81020	itr6_1450_pi.g2153_itr6_1450_pi.g2153.t1
OG0002369	CSbapl.81063	itr6_4350_pi.g1037_itr6_4350_pi.g1037.t1, itr6_4350_pi.g1035_itr6_4350_pi.g1035.t1.1.57f69240
OG0002370	CSbapl.81109	itr6_1_pilon.g23_itr6_1_pilon.g23.t1.1.57f6923d, itr6_1_pilon.g23_itr6_1_pilon.g23.t1
OG0002371	CSbapl.81433, CSbapl.81205	itr6_98_pilo.g1344_itr6_98_pilo.g1344.t1
OG0002372	CSbapl.81381	itr6_1844_pi.g2921_itr6_1844_pi.g2921.t1, itr6_1844_pi.g2921_itr6_1844_pi.g2921.t1.1.57f6923d
OG0002373	CSbapl.81394, CSbapl.81385	itr6_1113_pi.g2028_itr6_1113_pi.g2028.t1
OG0002374	CSbapl.81408	itr6_4066_pi.g1227_itr6_4066_pi.g1227.t1.1.57f69240, itr6_4066_pi.g1227_itr6_4066_pi.g1227.t1
OG0002376	CSbapl.81746, CSbapl.81727	itr6_2679_pi.g1237_itr6_2679_pi.g1237.t1
OG0002377	CSbapl.8175	itr6_1397_pi.g1425_itr6_1397_pi.g1425.t1, itr6_3179_pi.g2701_itr6_3179_pi.g2701.t1
OG0002378	CSbapl.82163	itr6_4698_pi.g1030_itr6_4698_pi.g1030.t1, itr6_4698_pi.g1030_itr6_4698_pi.g1030.t1.1.57f6f335
OG0002380	CSbapl.82457	itr6_2625_pi.g563_itr6_2625_pi.g563.t1.1.57f6923e, itr6_2625_pi.g563_itr6_2625_pi.g563.t1
OG0002381	CSbapl.82561	itr6_2071_pi.g2005_itr6_2071_pi.g2005.t1.1.57f6923d, itr6_2071_pi.g2005_itr6_2071_pi.g2005.t1
OG0002382	CSbapl.82854	itr6_1946_pi.g321_itr6_1946_pi.g321.t1, itr6_1946_pi.g321_itr6_1946_pi.g321.t1.1.57f6923d
OG0002384	CSbapl.83126	itr6_14761_p.g193_itr6_14761_p.g194_itr6_14761_p.g193.t1_itr6_14761_p.g194.t1, itr6_14761_p.g193_itr6_14761_p.g194_itr6_14761_p.g193.t1_itr6_14761_p.g194.t1.1.57f6f330
OG0002385	CSbapl.83266	itr6_2876_pi.g3161_itr6_2876_pi.g3161.t1, itr6_2024_pi.g1280_itr6_2024_pi.g1280.t1
OG0002386	CSbapl.83371	itr6_2158_pi.g2967_itr6_2158_pi.g2967.t1.1.57f6923d, itr6_2158_pi.g2967_itr6_2158_pi.g2967.t1
OG0002387	CSbapl.83485	itr6_2575_pi.g68_itr6_2575_pi.g68.t1.1.57f6923e, itr6_2575_pi.g68_itr6_2575_pi.g68.t1
OG0002389	CSbapl.84478	itr6_1334_pi.g610_itr6_1334_pi.g610.t1, itr6_1334_pi.g610_itr6_1334_pi.g610.t1.1.57f6923c
OG0002390	CSbapl.84493, CSbapl.84504	itr6_705_pil.g991_itr6_705_pil.g991.t1
OG0002392	CSbapl.85129, CSbapl.84666	itr6_3289_pi.g635_itr6_3289_pi.g635.t1
OG0002393	CSbapl.85180	itr6_2338_pi.g1045_itr6_2338_pi.g1045.t1, itr6_2338_pi.g1045_itr6_2338_pi.g1045.t1.1.57f6923d
OG0002394	CSbapl.85275	itr6_4583_pi.g418_itr6_4583_pi.g418.t1.1.57f69240, itr6_4583_pi.g418_itr6_4583_pi.g418.t1
OG0002395	CSbapl.85567	itr6_2263_pi.g143_itr6_2263_pi.g145_itr6_2263_pi.g143.t1_itr6_2263_pi.g145.t1, itr6_2263_pi.g143_itr6_2263_pi.g145_itr6_2263_pi.g143.t1_itr6_2263_pi.g145.t1.1.57f6f331
OG0002397	CSbapl.86003	itr6_6577_pi.g240_itr6_6577_pi.g240.t1, itr6_6577_pi.g240_itr6_6577_pi.g240.t1.1.57f69241
OG0002398	CSbapl.86081	itr6_508_pil.g2536_itr6_508_pil.g2536.t1.1.57f69241, itr6_508_pil.g2536_itr6_508_pil.g2536.t1
OG0002399	CSbapl.8634, CSbapl.8635	itr6_177_pil.g2249_itr6_177_pil.g2249.t1
OG0002400	CSbapl.86468, CSbapl.86465	itr6_5129_pi.g1451_itr6_5129_pi.g1451.t1
OG0002402	CSbapl.87042	itr6_1369_pi.g1094_itr6_1369_pi.g1094.t1, itr6_1369_pi.g1094_itr6_1369_pi.g1094.t1.1.57f6923c
OG0002403	CSbapl.87429	itr6_5421_pi.g950_itr6_5421_pi.g950.t1, itr6_1391_pi.g1343_itr6_1391_pi.g1343.t1
OG0002404	CSbapl.876	itr6_748_pil.g1515_itr6_748_pil.g1515.t1.1.57f69242, itr6_748_pil.g1515_itr6_748_pil.g1515.t1
OG0002409	CSbapl.87816	itr6_1_pilon.g17_itr6_1_pilon.g17.t1, itr6_1_pilon.g17_itr6_1_pilon.g17.t1.1.57f6923d
OG0002410	CSbapl.87885	itr6_1829_pi.g2777_itr6_1829_pi.g2777.t1, itr6_1829_pi.g2777_itr6_1829_pi.g2777.t1.1.57f6923d
OG0002412	CSbapl.88098	itr6_338_pil.g205_itr6_338_pil.g205.t1.1.57f6923f, itr6_338_pil.g205_itr6_338_pil.g205.t1
OG0002415	CSbapl.88947, CSbapl.88974	itr6_1819_pi.g2609_itr6_1819_pi.g2609.t1
OG0002417	CSbapl.89283	itr6_5970_pi.g560_itr6_5970_pi.g560.t1.1.57f69241, itr6_5970_pi.g560_itr6_5970_pi.g560.t1
OG0002418	CSbapl.89383, CSbapl.89369	itr6_1729_pi.g1401_itr6_1729_pi.g1401.t1
OG0002419	CSbapl.89954, CSbapl.90058	itr6_2672_pi.g1207_itr6_2672_pi.g1207.t1
OG0002420	CSbapl.89987	itr6_1450_pi.g2148_itr6_1450_pi.g2148.t1.1.57f6923c, itr6_1450_pi.g2148_itr6_1450_pi.g2148.t1
OG0002422	CSbapl.90133, CSbapl.90122	itr6_2895_pi.g67_itr6_2895_pi.g67.t1
OG0002423	CSbapl.90235, CSbapl.90233	itr6_2762_pi.g2072_itr6_2762_pi.g2072.t1
OG0002424	CSbapl.90293	itr6_3698_pi.g1312_itr6_3698_pi.g1312.t1.1.57f6923f, itr6_3698_pi.g1312_itr6_3698_pi.g1312.t1
OG0002425	CSbapl.90422	itr6_17576_p.g145_itr6_17576_p.g145.t1.1.57f6923c, itr6_17576_p.g145_itr6_17576_p.g145.t1
OG0002426	CSbapl.90479, CSbapl.90477	itr6_3230_pi.g184_itr6_3230_pi.g184.t1
OG0002427	CSbapl.93282, CSbapl.90787	itr6_6273_pi.g433_itr6_6273_pi.g433.t1
OG0002428	CSbapl.93284, CSbapl.90789	itr6_3897_pi.g353_itr6_3897_pi.g353.t1
OG0002429	CSbapl.90832	itr6_1441_pi.g2033_itr6_1441_pi.g2033.t1.1.57f6923c, itr6_1441_pi.g2033_itr6_1441_pi.g2033.t1
OG0002430	CSbapl.90886, CSbapl.90906	itr6_3577_pi.g365_itr6_3577_pi.g365.t1
OG0002431	CSbapl.9111	itr6_2167_pi.g3102_itr6_2167_pi.g3102.t1.1.57f6923d, itr6_2167_pi.g3102_itr6_2167_pi.g3102.t1
OG0002433	CSbapl.91473	itr6_532_pil.g2992_itr6_532_pil.g2992.t1.1.57f69241, itr6_532_pil.g2992_itr6_532_pil.g2992.t1
OG0002434	CSbapl.91670, CSbapl.91622	itr6_102_pil.g1418_itr6_102_pil.g1418.t1
OG0002435	CSbapl.9175, CSbapl.9174	itr6_429_pil.g1456_itr6_429_pil.g1456.t1
OG0002436	CSbapl.91950, CSbapl.91949	itr6_3301_pi.g699_itr6_3301_pi.g699.t1
OG0002437	CSbapl.92478	itr6_4827_pi.g65_itr6_4827_pi.g65.t1, itr6_4827_pi.g65_itr6_4827_pi.g65.t1.1.57f69240
OG0002439	CSbapl.92644	itr6_768_pil.g1812_itr6_768_pil.g1812.t1, itr6_2785_pi.g2274_itr6_2785_pi.g2274.t1
OG0002440	CSbapl.92706, CSbapl.92701	itr6_1118_pi.g2095_itr6_1118_pi.g2095.t1
OG0002441	CSbapl.93144, CSbapl.93126	itr6_4201_pi.g152_itr6_4201_pi.g152.t1
OG0002443	CSbapl.93246, CSbapl.93216	itr6_7871_pi.g154_itr6_7871_pi.g154.t1
OG0002444	CSbapl.95887, CSbapl.93287	itr6_1174_pi.g2683_itr6_1174_pi.g2683.t1
OG0002445	CSbapl.93529, CSbapl.93356	itr6_3368_pi.g1299_itr6_3368_pi.g1299.t1
OG0002446	CSbapl.93576, CSbapl.93592	itr6_1716_pi.g1218_itr6_1716_pi.g1218.t1
OG0002449	CSbapl.94371	itr6_2455_pi.g2152_itr6_2455_pi.g2152.t1, itr6_4469_pi.g1683_itr6_4469_pi.g1683.t1
OG0002451	CSbapl.94395, CSbapl.94420	itr6_4756_pi.g1382_itr6_4756_pi.g1382.t1
OG0002452	CSbapl.94422, CSbapl.94398	itr6_2911_pi.g206_itr6_2911_pi.g206.t1
OG0002453	CSbapl.94447, CSbapl.94462	itr6_1722_pi.g1310_itr6_1722_pi.g1310.t1
OG0002454	CSbapl.94638, CSbapl.94628	itr6_3093_pi.g2018_itr6_3093_pi.g2018.t1
OG0002458	CSbapl.95171, CSbapl.95173	itr6_4207_pi.g197_itr6_4207_pi.g197.t1
OG0002459	CSbapl.95227	itr6_2128_pi.g2745_itr6_2128_pi.g2745.t1.1.57f6923d, itr6_2128_pi.g2745_itr6_2128_pi.g2745.t1
OG0002461	CSbapl.95531	itr6_445_pil.g1690_itr6_445_pil.g1690.t1, itr6_445_pil.g1690_itr6_445_pil.g1690.t1.1.57f69240
OG0002462	CSbapl.95532	itr6_76_pilo.g967_itr6_76_pilo.g967.t1, itr6_76_pilo.g967_itr6_76_pilo.g967.t1.1.57f69242
OG0002464	CSbapl.95885	itr6_1396_pi.g1408_itr6_1396_pi.g1408.t1, itr6_1396_pi.g1408_itr6_1396_pi.g1408.t1.1.57f6923c
OG0002468	CSbapl.96302, CSbapl.96307	itr6_1744_pi.g1622_itr6_1744_pi.g1622.t1
OG0002469	CSbapl.96352, CSbapl.96376	itr6_5354_pi.g723_itr6_5354_pi.g723.t1
OG0002471	CSbapl.96762	itr6_5922_pi.g403_itr6_5922_pi.g403.t1.1.57f69241, itr6_5922_pi.g403_itr6_5922_pi.g403.t1
OG0002472	CSbapl.96824, CSbapl.96852	itr6_992_pil.g339_itr6_992_pil.g339.t1
OG0002475	CSbapl.97207, CSbapl.97198	itr6_11307_p.g53_itr6_11307_p.g53.t1
OG0002476	CSbapl.9721, CSbapl.9723	itr6_1118_pi.g2096_itr6_1118_pi.g2096.t1
OG0002477	CSbapl.97561, CSbapl.97565	itr6_490_pil.g2382_itr6_490_pil.g2382.t1.1.57f69240
OG0002478	CSbapl.97669	itr6_4151_pi.g1695_itr6_4151_pi.g1695.t1.2.57f6f334, itr6_4151_pi.g1695_itr6_4151_pi.g1695.t1.3.57f6f334
OG0002479	CSbapl.98176	itr6_5381_pi.g797_itr6_5381_pi.g797.t1, itr6_5381_pi.g797_itr6_5381_pi.g797.t1.1.57f69241
OG0002480	CSbapl.98547, CSbapl.98555	itr6_2587_pi.g209_itr6_2587_pi.g209.t1
OG0002483	CSbapl.9927	itr6_456_pil.g1808_itr6_456_pil.g1812_itr6_456_pil.g1808.t1_itr6_456_pil.g1812.t1, itr6_456_pil.g1808_itr6_456_pil.g1812_itr6_456_pil.g1808.t1_itr6_456_pil.g1812.t1.1.57f6f335
OG0002485	CSbapl.99308, CSbapl.99315	itr6_1635_pi.g343_itr6_1635_pi.g343.t1
OG0002488	CSbapl.99475	itr6_4847_pi.g179_itr6_4847_pi.g179.t1, itr6_10830_p.g186_itr6_10830_p.g186.t1
OG0002491	CSbapl.99862, CSbapl.99847	itr6_2439_pi.g1977_itr6_2439_pi.g1977.t1
OG0002493	CSbapl.99851, CSbapl.99856	itr6_5655_pi.g651_itr6_5655_pi.g651.t1
OG0003063	CSbapl.100460	itr6_3229_pi.g155_itr6_3229_pi.g155.t1
OG0003072	CSbapl.100614	itr6_14393_p.g154_itr6_14393_p.g154.t1
OG0003091	CSbapl.10088	itr6_4098_pi.g1374_itr6_4098_pi.g1374.t1
OG0003093	CSbapl.100938	itr6_18696_p.g37_itr6_18696_p.g37.t1
OG0003097	CSbapl.101002	itr6_5283_pi.g450_itr6_5283_pi.g450.t1
OG0003103	CSbapl.101125	itr6_5923_pi.g405_itr6_5923_pi.g405.t1
OG0003120	CSbapl.10128	itr6_158_pil.g1989_itr6_158_pil.g1989.t1
OG0003122	CSbapl.1013	itr6_3774_pi.g1871_itr6_3774_pi.g1871.t1
OG0003126	CSbapl.101331	itr6_3447_pi.g1960_itr6_3447_pi.g1960.t1
OG0003128	CSbapl.10196	itr6_6291_pi.g468_itr6_6291_pi.g468.t1
OG0003132	CSbapl.1025	itr6_5911_pi.g371_itr6_5911_pi.g371.t1
OG0003133	CSbapl.10267	itr6_4013_pi.g1018_itr6_4013_pi.g1018.t1
OG0003134	CSbapl.10272	itr6_4720_pi.g1184_itr6_4720_pi.g1184.t1
OG0003135	CSbapl.10273	itr6_4720_pi.g1183_itr6_4720_pi.g1183.t1
OG0003137	CSbapl.10298	itr6_2039_pi.g1535_itr6_2039_pi.g1535.t1
OG0003138	CSbapl.10300	itr6_3306_pi.g751_itr6_3306_pi.g752_itr6_3306_pi.g751.t1_itr6_3306_pi.g752.t1
OG0003139	CSbapl.10317	itr6_202_pil.g2526_itr6_202_pil.g2526.t1
OG0003141	CSbapl.10370	itr6_4962_pi.g761_itr6_4962_pi.g761.t1
OG0003148	CSbapl.10492	itr6_4578_pi.g399_itr6_4578_pi.g399.t1
OG0003151	CSbapl.1061	itr6_1385_pi.g1261_itr6_1385_pi.g1261.t1
OG0003159	CSbapl.10751	itr6_1372_pi.g1132_itr6_1372_pi.g1132.t1
OG0003161	CSbapl.10760	itr6_4831_pi.g97_itr6_4831_pi.g97.t1
OG0003170	CSbapl.10871	itr6_2671_pi.g1195_itr6_2671_pi.g1195.t1
OG0003171	CSbapl.10885	itr6_3957_pi.g764_itr6_3957_pi.g764.t1
OG0003172	CSbapl.1091	itr6_4313_pi.g824_itr6_4313_pi.g824.t1
OG0003173	CSbapl.10920	itr6_9546_pi.g200_itr6_9546_pi.g200.t1.1.57f69242
OG0003175	CSbapl.10947	itr6_5109_pi.g1380_itr6_5109_pi.g1380.t1
OG0003176	CSbapl.10950	itr6_841_pil.g2890_itr6_841_pil.g2890.t1
OG0003177	CSbapl.10970	itr6_794_pil.g2103_itr6_794_pil.g2103.t1
OG0003185	CSbapl.11071	itr6_4859_pi.g250_itr6_4859_pi.g250.t1
OG0003190	CSbapl.11166	itr6_4849_pi.g201_itr6_4849_pi.g201.t1
OG0003198	CSbapl.11211	itr6_1184_pi.g2762_itr6_1184_pi.g2762.t1
OG0003200	CSbapl.11260	itr6_5827_pi.g145_itr6_5827_pi.g145.t1
OG0003219	CSbapl.11609	itr6_2052_pi.g1699_itr6_2052_pi.g1699.t1
OG0003220	CSbapl.11616	itr6_5750_pi.g985_itr6_5750_pi.g985.t1
OG0003222	CSbapl.11628	itr6_1087_pi.g1620_itr6_1087_pi.g1620.t1
OG0003227	CSbapl.11698	itr6_3063_pi.g1745_itr6_3063_pi.g1745.t1
OG0003230	CSbapl.11757	itr6_1446_pi.g2079_itr6_1446_pi.g2079.t1
OG0003237	CSbapl.11897	itr6_3065_pi.g1805_itr6_3065_pi.g1805.t1
OG0003241	CSbapl.11936	itr6_2052_pi.g1702_itr6_2052_pi.g1702.t1
OG0003246	CSbapl.12037	itr6_1962_pi.g524_itr6_1962_pi.g524.t1
OG0003252	CSbapl.12088	itr6_2929_pi.g404_itr6_2929_pi.g404.t1
OG0003253	CSbapl.1210	itr6_2705_pi.g1486_itr6_2705_pi.g1486.t1
OG0003254	CSbapl.12104	itr6_4801_pi.g1604_itr6_4801_pi.g1604.t1
OG0003255	CSbapl.12127	itr6_4009_pi.g1005_itr6_4009_pi.g1005.t1
OG0003256	CSbapl.12133	itr6_4009_pi.g1008_itr6_4009_pi.g1008.t1
OG0003258	CSbapl.12158	itr6_142_pil.g1802_itr6_142_pil.g1802.t1
OG0003259	CSbapl.12166	itr6_2005_pi.g1103_itr6_2005_pi.g1103.t1
OG0003260	CSbapl.12179	itr6_2005_pi.g1109_itr6_2005_pi.g1109.t1
OG0003261	CSbapl.12194	itr6_4608_pi.g521_itr6_4608_pi.g521.t1
OG0003263	CSbapl.1224	itr6_14052_p.g145_itr6_14052_p.g145.t1
OG0003268	CSbapl.12326	itr6_2499_pi.g2743_itr6_2499_pi.g2743.t1
OG0003269	CSbapl.12382	itr6_3611_pi.g592_itr6_3611_pi.g592.t1
OG0003271	CSbapl.12421	itr6_8988_pi.g272_itr6_8988_pi.g272.t1
OG0003278	CSbapl.12486	itr6_1416_pi.g1693_itr6_1416_pi.g1693.t1
OG0003279	CSbapl.12488	itr6_146_pil.g1857_itr6_146_pil.g1857.t1
OG0003280	CSbapl.12489	itr6_1004_pi.g514_itr6_1004_pi.g514.t1
OG0003282	CSbapl.12503	itr6_2795_pi.g2377_itr6_2795_pi.g2377.t1
OG0003284	CSbapl.1253	itr6_5237_pi.g302_itr6_5237_pi.g302.t1
OG0003285	CSbapl.12535	itr6_422_pil.g1351_itr6_422_pil.g1351.t1
OG0003287	CSbapl.12561	itr6_7535_pi.g95_itr6_7535_pi.g95.t1
OG0003291	CSbapl.12594	itr6_5051_pi.g1181_itr6_5051_pi.g1181.t1
OG0003293	CSbapl.12615	itr6_5240_pi.g314_itr6_5240_pi.g314.t1
OG0003294	CSbapl.12624	itr6_4674_pi.g890_itr6_4674_pi.g890.t1
OG0003296	CSbapl.12696	itr6_485_pil.g2227_itr6_485_pil.g2227.t1
OG0003306	CSbapl.12916	itr6_1043_pi.g1054_itr6_1043_pi.g1054.t1
OG0003307	CSbapl.12946	itr6_3251_pi.g330_itr6_3251_pi.g330.t1
OG0003308	CSbapl.12947	itr6_3251_pi.g326_itr6_3251_pi.g326.t1
OG0003312	CSbapl.13025	itr6_3585_pi.g434_itr6_3585_pi.g434.t1
OG0003314	CSbapl.1305	itr6_2105_pi.g2423_itr6_2105_pi.g2423.t1
OG0003315	CSbapl.13062	itr6_357_pil.g417_itr6_357_pil.g417.t1
OG0003321	CSbapl.13217	itr6_1629_pi.g289_itr6_1629_pi.g289.t1
OG0003326	CSbapl.13365	itr6_1502_pi.g2754_itr6_1502_pi.g2754.t1
OG0003327	CSbapl.13383	itr6_1502_pi.g2757_itr6_1502_pi.g2757.t1
OG0003336	CSbapl.13488	itr6_4315_pi.g834_itr6_4315_pi.g834.t1
OG0003342	CSbapl.13562	itr6_5699_pi.g784_itr6_5699_pi.g784.t1
OG0003355	CSbapl.13708	itr6_3025_pi.g1352_itr6_3025_pi.g1364_itr6_3025_pi.g1352.t1_itr6_3025_pi.g1364.t1
OG0003356	CSbapl.13720	itr6_548_pil.g3173_itr6_548_pil.g3173.t1
OG0003360	CSbapl.13841	itr6_830_pil.g2711_itr6_830_pil.g2711.t1
OG0003361	CSbapl.13853	itr6_3761_pi.g1782_itr6_3761_pi.g1782.t1
OG0003364	CSbapl.13873	itr6_6786_pi.g25_itr6_6786_pi.g25.t1
OG0003373	CSbapl.14015	itr6_2622_pi.g501_itr6_2622_pi.g501.t1
OG0003378	CSbapl.14131	itr6_1509_pi.g2867_itr6_1509_pi.g2867.t1
OG0003379	CSbapl.14137	itr6_778_pil.g1913_itr6_778_pil.g1913.t1
OG0003393	CSbapl.14343	itr6_4628_pi.g648_itr6_4628_pi.g650_itr6_4628_pi.g648.t1_itr6_4628_pi.g650.t1
OG0003395	CSbapl.14367	itr6_2685_pi.g1276_itr6_2685_pi.g1276.t1
OG0003396	CSbapl.14424	itr6_4827_pi.g51_itr6_4827_pi.g51.t1
OG0003397	CSbapl.14427	itr6_4827_pi.g58_itr6_4827_pi.g58.t1
OG0003398	CSbapl.14428	itr6_12778_p.g162_itr6_12778_p.g162.t1
OG0003399	CSbapl.14434	itr6_12778_p.g163_itr6_12778_p.g163.t1
OG0003400	CSbapl.14437	itr6_3224_pi.g74_itr6_3224_pi.g74.t1
OG0003410	CSbapl.14591	itr6_3243_pi.g289_itr6_3243_pi.g289.t1
OG0003413	CSbapl.14632	itr6_842_pil.g2918_itr6_842_pil.g2918.t1
OG0003415	CSbapl.14702	itr6_1010_pi.g580_itr6_1010_pi.g580.t1
OG0003417	CSbapl.14742	itr6_6221_pi.g288_itr6_6221_pi.g288.t1
OG0003422	CSbapl.14839	itr6_4_pilon.g55_itr6_4_pilon.g55.t1
OG0003427	CSbapl.14925	itr6_4545_pi.g234_itr6_4545_pi.g234.t1
OG0003429	CSbapl.14942	itr6_4545_pi.g232_itr6_4545_pi.g232.t1
OG0003430	CSbapl.14963	itr6_1932_pi.g57_itr6_1932_pi.g57.t1
OG0003432	CSbapl.14977	itr6_2329_pi.g958_itr6_2329_pi.g958.t1
OG0003434	CSbapl.15012	itr6_3155_pi.g2524_itr6_3155_pi.g2524.t1
OG0003435	CSbapl.15017	itr6_174_pil.g2192_itr6_174_pil.g2192.t1
OG0003436	CSbapl.15021	itr6_14073_p.g157_itr6_14073_p.g157.t1
OG0003440	CSbapl.15033	itr6_16441_p.g57_itr6_16441_p.g57.t1
OG0003441	CSbapl.15044	itr6_3601_pi.g532_itr6_3601_pi.g529_itr6_3601_pi.g532.t1_itr6_3601_pi.g529.t1
OG0003445	CSbapl.15171	itr6_11470_p.g176_itr6_11470_p.g176.t1
OG0003446	CSbapl.15191	itr6_4189_pi.g75_itr6_4189_pi.g75.t1
OG0003449	CSbapl.15254	itr6_2630_pi.g613_itr6_2630_pi.g613.t1
OG0003450	CSbapl.15255	itr6_2630_pi.g614_itr6_2630_pi.g614.t1
OG0003451	CSbapl.15256	itr6_1677_pi.g824_itr6_1677_pi.g824.t1
OG0003452	CSbapl.15280	itr6_1096_pi.g1779_itr6_1096_pi.g1779.t1
OG0003460	CSbapl.15430	itr6_479_pil.g2130_itr6_479_pil.g2130.t1
OG0003462	CSbapl.15453	itr6_4788_pi.g1555_itr6_4788_pi.g1555.t1
OG0003465	CSbapl.15530	itr6_1432_pi.g1845_itr6_1432_pi.g1845.t1
OG0003473	CSbapl.15630	itr6_2938_pi.g475_itr6_2938_pi.g475.t1
OG0003474	CSbapl.15633	itr6_12080_p.g112_itr6_12080_p.g112.t1
OG0003476	CSbapl.15652	itr6_5675_pi.g711_itr6_5675_pi.g711.t1
OG0003481	CSbapl.15746	itr6_701_pil.g933_itr6_701_pil.g933.t1
OG0003482	CSbapl.15761	itr6_2727_pi.g1680_itr6_2727_pi.g1680.t1
OG0003485	CSbapl.15801	itr6_2108_pi.g2448_itr6_2108_pi.g2448.t1
OG0003500	CSbapl.16030	itr6_2462_pi.g2307_itr6_2462_pi.g2308_itr6_2462_pi.g2307.t1_itr6_2462_pi.g2308.t1
OG0003502	CSbapl.16142	itr6_2317_pi.g805_itr6_2317_pi.g805.t1
OG0003504	CSbapl.1617	itr6_1329_pi.g515_itr6_1329_pi.g515.t1
OG0003505	CSbapl.16225	itr6_90_pilo.g1206_itr6_90_pilo.g1206.t1
OG0003507	CSbapl.16267	itr6_4546_pi.g242_itr6_4546_pi.g242.t1
OG0003509	CSbapl.16292	itr6_7902_pi.g186_itr6_7902_pi.g186.t1
OG0003510	CSbapl.16355	itr6_1663_pi.g665_itr6_1663_pi.g665.t1
OG0003513	CSbapl.16441	itr6_3032_pi.g1447_itr6_3032_pi.g1447.t1
OG0003518	CSbapl.16569	itr6_5697_pi.g776_itr6_5697_pi.g776.t1
OG0003520	CSbapl.1663	itr6_1113_pi.g2021_itr6_1113_pi.g2021.t1
OG0003524	CSbapl.16713	itr6_1145_pi.g2345_itr6_1145_pi.g2345.t1
OG0003525	CSbapl.16817	itr6_3303_pi.g740_itr6_3303_pi.g740.t1
OG0003527	CSbapl.16861	itr6_3634_pi.g773_itr6_3634_pi.g773.t1
OG0003532	CSbapl.17021	itr6_436_pil.g1554_itr6_436_pil.g1554.t1
OG0003533	CSbapl.17034	itr6_1312_pi.g351_itr6_1312_pi.g351.t1
OG0003535	CSbapl.17091	itr6_4672_pi.g875_itr6_4672_pi.g875.t1
OG0003545	CSbapl.17179	itr6_2728_pi.g1700_itr6_2728_pi.g1700.t1
OG0003551	CSbapl.17267	itr6_1931_pi.g29_itr6_1931_pi.g29.t1
OG0003552	CSbapl.1727	itr6_1195_pi.g2901_itr6_1195_pi.g2901.t1
OG0003553	CSbapl.17273	itr6_1354_pi.g874_itr6_1354_pi.g874.t1
OG0003555	CSbapl.17326	itr6_2424_pi.g1869_itr6_2424_pi.g1869.t1
OG0003557	CSbapl.17385	itr6_3049_pi.g1596_itr6_3049_pi.g1596.t1
OG0003558	CSbapl.17386	itr6_2004_pi.g1044_itr6_2004_pi.g1044.t1
OG0003559	CSbapl.1742	itr6_3372_pi.g1355_itr6_3372_pi.g1355.t1
OG0003564	CSbapl.17487	itr6_9785_pi.g109_itr6_9785_pi.g109.t1
OG0003576	CSbapl.1766	itr6_3264_pi.g420_itr6_3264_pi.g420.t1
OG0003577	CSbapl.17677	itr6_3330_pi.g973_itr6_3330_pi.g973.t1
OG0003578	CSbapl.1768	itr6_1509_pi.g2879_itr6_1509_pi.g2879.t1
OG0003585	CSbapl.17814	itr6_3508_pi.g2454_itr6_3508_pi.g2454.t1
OG0003588	CSbapl.17893	itr6_8349_pi.g7_itr6_8349_pi.g7.t1
OG0003590	CSbapl.17916	itr6_3064_pi.g1768_itr6_3064_pi.g1768.t1
OG0003591	CSbapl.17921	itr6_3636_pi.g809_itr6_3636_pi.g809.t1
OG0003595	CSbapl.18046	itr6_4957_pi.g746_itr6_4957_pi.g746.t1
OG0003596	CSbapl.18051	itr6_1370_pi.g1107_itr6_1370_pi.g1107.t1
OG0003597	CSbapl.18073	itr6_495_pil.g2418_itr6_495_pil.g2418.t1
OG0003598	CSbapl.18095	itr6_1049_pi.g1145_itr6_1049_pi.g1145.t1
OG0003599	CSbapl.18096	itr6_3723_pi.g1508_itr6_3723_pi.g1508.t1
OG0003602	CSbapl.18119	itr6_4685_pi.g942_itr6_4685_pi.g942.t1
OG0003603	CSbapl.18134	itr6_1484_pi.g2604_itr6_1484_pi.g2604.t1
OG0003604	CSbapl.18137	itr6_1484_pi.g2607_itr6_1484_pi.g2607.t1
OG0003605	CSbapl.18153	itr6_5504_pi.g162_itr6_5504_pi.g162.t1
OG0003607	CSbapl.18176	itr6_55_pilo.g797_itr6_55_pilo.g797.t1
OG0003608	CSbapl.1818	itr6_12618_p.g54_itr6_12618_p.g54.t1
OG0003612	CSbapl.18236	itr6_1065_pi.g1413_itr6_1065_pi.g1413.t1
OG0003613	CSbapl.18245	itr6_1395_pi.g1388_itr6_1395_pi.g1388.t1
OG0003614	CSbapl.18306	itr6_2120_pi.g2689_itr6_2120_pi.g2689.t1
OG0003617	CSbapl.18377	itr6_156_pil.g1947_itr6_156_pil.g1947.t1
OG0003618	CSbapl.1843	itr6_2829_pi.g2739_itr6_2829_pi.g2739.t1.1.57f6923e
OG0003624	CSbapl.18525	itr6_2027_pi.g1318_itr6_2027_pi.g1318.t1
OG0003626	CSbapl.18531	itr6_2102_pi.g2356_itr6_2102_pi.g2356.t1
OG0003633	CSbapl.1865	itr6_3438_pi.g1874_itr6_3438_pi.g1874.t1
OG0003635	CSbapl.1869	itr6_13998_p.g118_itr6_13998_p.g118.t1
OG0003636	CSbapl.18705	itr6_3314_pi.g844_itr6_3314_pi.g844.t1
OG0003641	CSbapl.18755	itr6_511_pil.g2588_itr6_511_pil.g2588.t1
OG0003642	CSbapl.18767	itr6_77_pilo.g986_itr6_77_pilo.g986.t1
OG0003646	CSbapl.1898	itr6_2829_pi.g2739_itr6_2829_pi.g2739.t1.2.57f6923e
OG0003648	CSbapl.19014	itr6_2011_pi.g1164_itr6_2011_pi.g1164.t1
OG0003649	CSbapl.1906	itr6_5346_pi.g691_itr6_5346_pi.g691.t1
OG0003650	CSbapl.1908	itr6_5346_pi.g690_itr6_5346_pi.g690.t1
OG0003651	CSbapl.19101	itr6_116_pil.g1539_itr6_116_pil.g1539.t1
OG0003653	CSbapl.1913	itr6_5346_pi.g688_itr6_5346_pi.g688.t1
OG0003654	CSbapl.1914	itr6_5346_pi.g686_itr6_5346_pi.g686.t1
OG0003662	CSbapl.19262	itr6_3341_pi.g1082_itr6_3341_pi.g1082.t1
OG0003671	CSbapl.19622	itr6_2579_pi.g83_itr6_2579_pi.g83.t1
OG0003674	CSbapl.19711	itr6_1003_pi.g458_itr6_1003_pi.g458.t1
OG0003682	CSbapl.1979	itr6_335_pil.g186_itr6_335_pil.g186.t1
OG0003691	CSbapl.19946	itr6_4732_pi.g1266_itr6_4732_pi.g1266.t1
OG0003702	CSbapl.19992	itr6_20180_p.g143_itr6_20180_p.g143.t1
OG0003726	CSbapl.20273	itr6_6167_pi.g161_itr6_6167_pi.g161.t1
OG0003727	CSbapl.20284	itr6_102_pil.g1413_itr6_102_pil.g1413.t1
OG0003728	CSbapl.20297	itr6_2358_pi.g1305_itr6_2358_pi.g1305.t1
OG0003738	CSbapl.20498	itr6_4072_pi.g1235_itr6_4072_pi.g1235.t1
OG0003739	CSbapl.2052	itr6_3062_pi.g1736_itr6_3062_pi.g1739_itr6_3062_pi.g1736.t1_itr6_3062_pi.g1739.t1
OG0003742	CSbapl.20546	itr6_3835_pi.g2360_itr6_3835_pi.g2360.t1
OG0003750	CSbapl.20732	itr6_1436_pi.g1935_itr6_1436_pi.g1935.t1
OG0003755	CSbapl.20787	itr6_1821_pi.g2637_itr6_1821_pi.g2637.t1
OG0003764	CSbapl.20842	itr6_1194_pi.g2889_itr6_1194_pi.g2889.t1
OG0003770	CSbapl.20913	itr6_8609_pi.g204_itr6_8609_pi.g204.t1
OG0003775	CSbapl.21052	itr6_2113_pi.g2579_itr6_2113_pi.g2579.t1
OG0003776	CSbapl.21069	itr6_2570_pi.g13_itr6_2570_pi.g13.t1
OG0003777	CSbapl.21101	itr6_4064_pi.g1222_itr6_4064_pi.g1222.t1
OG0003779	CSbapl.21127	itr6_1108_pi.g1941_itr6_1108_pi.g1941.t1
OG0003780	CSbapl.2113	itr6_2014_pi.g1188_itr6_2014_pi.g1188.t1
OG0003782	CSbapl.2116	itr6_1108_pi.g1929_itr6_1108_pi.g1929.t1
OG0003783	CSbapl.21186	itr6_235_pil.g2961_itr6_235_pil.g2961.t1
OG0003784	CSbapl.21207	itr6_1368_pi.g1075_itr6_1368_pi.g1075.t1
OG0003786	CSbapl.21255	itr6_128_pil.g1653_itr6_128_pil.g1653.t1
OG0003787	CSbapl.21260	itr6_208_pil.g2622_itr6_208_pil.g2622.t1
OG0003791	CSbapl.21336	itr6_1375_pi.g1186_itr6_1375_pi.g1186.t1
OG0003793	CSbapl.21389	itr6_16317_p.g144_itr6_16317_p.g144.t1
OG0003794	CSbapl.21399	itr6_5994_pi.g627_itr6_5994_pi.g627.t1
OG0003796	CSbapl.21439	itr6_12059_p.g103_itr6_12059_p.g103.t1
OG0003813	CSbapl.2163	itr6_4014_pi.g1026_itr6_4014_pi.g1026.t1
OG0003820	CSbapl.21884	itr6_3235_pi.g224_itr6_3235_pi.g224.t1
OG0003822	CSbapl.220	itr6_737_pil.g1385_itr6_737_pil.g1385.t1
OG0003824	CSbapl.22038	itr6_4018_pi.g1054_itr6_4018_pi.g1054.t1
OG0003826	CSbapl.22096	itr6_526_pil.g2909_itr6_526_pil.g2909.t1
OG0003828	CSbapl.22109	itr6_1627_pi.g259_itr6_1627_pi.g259.t1
OG0003830	CSbapl.22110	itr6_1962_pi.g526_itr6_1962_pi.g526.t1
OG0003837	CSbapl.22216	itr6_6399_pi.g728_itr6_6399_pi.g728.t1
OG0003847	CSbapl.2237	itr6_4237_pi.g307_itr6_4237_pi.g307.t1
OG0003850	CSbapl.22421	itr6_1342_pi.g752_itr6_1342_pi.g752.t1
OG0003851	CSbapl.22438	itr6_3765_pi.g1830_itr6_3765_pi.g1830.t1.1.57f6923f
OG0003852	CSbapl.22448	itr6_2989_pi.g934_itr6_2989_pi.g934.t1
OG0003854	CSbapl.2247	itr6_1823_pi.g2682_itr6_1823_pi.g2682.t1
OG0003855	CSbapl.22472	itr6_3064_pi.g1779_itr6_3064_pi.g1779.t1
OG0003875	CSbapl.22761	itr6_1681_pi.g856_itr6_1681_pi.g856.t1
OG0003878	CSbapl.22789	itr6_5303_pi.g536_itr6_5303_pi.g536.t1
OG0003897	CSbapl.23386	itr6_3030_pi.g1394_itr6_3030_pi.g1394.t1
OG0003898	CSbapl.23402	itr6_3044_pi.g1554_itr6_3044_pi.g1554.t1
OG0003906	CSbapl.23615	itr6_439_pil.g1598_itr6_439_pil.g1598.t1
OG0003907	CSbapl.23657	itr6_192_pil.g2395_itr6_192_pil.g2395.t1
OG0003911	CSbapl.2373	itr6_16077_p.g11_itr6_16077_p.g11.t1
OG0003916	CSbapl.23870	itr6_1062_pi.g1359_itr6_1062_pi.g1359.t1
OG0003921	CSbapl.23901	itr6_6063_pi.g823_itr6_6063_pi.g823.t1
OG0003922	CSbapl.23902	itr6_6063_pi.g820_itr6_6063_pi.g820.t1
OG0003923	CSbapl.23907	itr6_2685_pi.g1290_itr6_2685_pi.g1290.t1
OG0003927	CSbapl.23981	itr6_3464_pi.g2096_itr6_3464_pi.g2096.t1
OG0003931	CSbapl.24042	itr6_725_pil.g1247_itr6_725_pil.g1247.t1
OG0003932	CSbapl.24053	itr6_2451_pi.g2105_itr6_2451_pi.g2105.t1
OG0003934	CSbapl.24098	itr6_18883_p.g134_itr6_18883_p.g134.t1
OG0003935	CSbapl.24113	itr6_2724_pi.g1599_itr6_2724_pi.g1599.t1
OG0003936	CSbapl.24150	itr6_14252_p.g66_itr6_14252_p.g66.t1
OG0003938	CSbapl.2416	itr6_2132_pi.g2783_itr6_2132_pi.g2783.t1
OG0003939	CSbapl.24164	itr6_14252_p.g67_itr6_14252_p.g67.t1
OG0003940	CSbapl.2420	itr6_2266_pi.g178_itr6_2266_pi.g178.t1
OG0003945	CSbapl.24225	itr6_6255_pi.g391_itr6_6255_pi.g391.t1
OG0003948	CSbapl.24296	itr6_2785_pi.g2286_itr6_2785_pi.g2286.t1
OG0003949	CSbapl.24313	itr6_692_pil.g681_itr6_692_pil.g681.t1
OG0003950	CSbapl.2432	itr6_3713_pi.g1426_itr6_3713_pi.g1429_itr6_3713_pi.g1426.t1_itr6_3713_pi.g1429.t1
OG0003952	CSbapl.24341	itr6_1311_pi.g275_itr6_1311_pi.g275.t1
OG0003962	CSbapl.24484	itr6_5187_pi.g141_itr6_5187_pi.g141.t1
OG0003963	CSbapl.24505	itr6_2078_pi.g2143_itr6_2078_pi.g2143.t1
OG0003974	CSbapl.24706	itr6_1455_pi.g2225_itr6_1455_pi.g2225.t1
OG0003975	CSbapl.24712	itr6_467_pil.g1978_itr6_467_pil.g1978.t1
OG0003983	CSbapl.2477	itr6_3673_pi.g1120_itr6_3673_pi.g1120.t1
OG0003988	CSbapl.2495	itr6_2248_pi.g1_itr6_2248_pi.g1.t1
OG0003994	CSbapl.25212	itr6_5948_pi.g487_itr6_5948_pi.g487.t1
OG0003998	CSbapl.25368	itr6_3152_pi.g2513_itr6_3152_pi.g2513.t1
OG0003999	CSbapl.25374	itr6_4469_pi.g1668_itr6_4469_pi.g1668.t1
OG0004001	CSbapl.25411	itr6_3161_pi.g2594_itr6_3161_pi.g2594.t1
OG0004009	CSbapl.25603	itr6_7608_pi.g151_itr6_7608_pi.g151.t1
OG0004010	CSbapl.25619	itr6_11714_p.g111_itr6_11714_p.g111.t1
OG0004014	CSbapl.25736	itr6_377_pil.g777_itr6_377_pil.g777.t1
OG0004015	CSbapl.25738	itr6_377_pil.g778_itr6_377_pil.g778.t1
OG0004021	CSbapl.25815	itr6_4868_pi.g318_itr6_4868_pi.g318.t1
OG0004023	CSbapl.25935	itr6_1_pilon.g6_itr6_1_pilon.g6.t1
OG0004024	CSbapl.25942	itr6_6119_pi.g60_itr6_6119_pi.g60.t1
OG0004026	CSbapl.25952	itr6_3553_pi.g124_itr6_3553_pi.g124.t1
OG0004027	CSbapl.25977	itr6_3182_pi.g2734_itr6_3182_pi.g2734.t1
OG0004033	CSbapl.26070	itr6_1436_pi.g1906_itr6_1436_pi.g1906.t1
OG0004035	CSbapl.26118	itr6_2032_pi.g1423_itr6_2032_pi.g1423.t1
OG0004036	CSbapl.26156	itr6_2037_pi.g1512_itr6_2037_pi.g1512.t1
OG0004037	CSbapl.26158	itr6_2037_pi.g1514_itr6_2037_pi.g1514.t1
OG0004038	CSbapl.26160	itr6_2037_pi.g1515_itr6_2037_pi.g1515.t1
OG0004039	CSbapl.26162	itr6_2037_pi.g1517_itr6_2037_pi.g1517.t1
OG0004041	CSbapl.2622	itr6_6271_pi.g429_itr6_6271_pi.g429.t1
OG0004042	CSbapl.26241	itr6_16_pilo.g291_itr6_16_pilo.g291.t1
OG0004043	CSbapl.26252	itr6_2457_pi.g2194_itr6_2457_pi.g2194.t1
OG0004044	CSbapl.2628	itr6_2648_pi.g894_itr6_2648_pi.g894.t1
OG0004045	CSbapl.26281	itr6_1941_pi.g205_itr6_1941_pi.g205.t1
OG0004059	CSbapl.26370	itr6_1648_pi.g477_itr6_1648_pi.g477.t1
OG0004064	CSbapl.26566	itr6_1141_pi.g2300_itr6_1141_pi.g2300.t1
OG0004065	CSbapl.26577	itr6_4091_pi.g1322_itr6_4091_pi.g1322.t1
OG0004066	CSbapl.26594	itr6_2743_pi.g1883_itr6_2743_pi.g1883.t1
OG0004067	CSbapl.26597	itr6_2743_pi.g1885_itr6_2743_pi.g1885.t1
OG0004069	CSbapl.26610	itr6_3030_pi.g1409_itr6_3030_pi.g1409.t1
OG0004078	CSbapl.26808	itr6_427_pil.g1417_itr6_427_pil.g1417.t1
OG0004079	CSbapl.26817	itr6_10170_p.g194_itr6_10170_p.g194.t1
OG0004080	CSbapl.26850	itr6_508_pil.g2555_itr6_508_pil.g2555.t1
OG0004083	CSbapl.269	itr6_1947_pi.g338_itr6_1947_pi.g338.t1
OG0004084	CSbapl.26925	itr6_10967_p.g39_itr6_10967_p.g39.t1
OG0004085	CSbapl.26932	itr6_2762_pi.g2064_itr6_2762_pi.g2064.t1
OG0004086	CSbapl.26961	itr6_2330_pi.g967_itr6_2330_pi.g967.t1
OG0004091	CSbapl.27051	itr6_1783_pi.g2231_itr6_1783_pi.g2231.t1
OG0004093	CSbapl.27137	itr6_2695_pi.g1365_itr6_2695_pi.g1365.t1
OG0004096	CSbapl.27177	itr6_712_pil.g1102_itr6_712_pil.g1102.t1
OG0004097	CSbapl.27190	itr6_1436_pi.g1943_itr6_1436_pi.g1943.t1
OG0004099	CSbapl.27242	itr6_6236_pi.g340_itr6_6236_pi.g340.t1
OG0004104	CSbapl.2742	itr6_5063_pi.g1231_itr6_5063_pi.g1231.t1
OG0004106	CSbapl.27427	itr6_19543_p.g140_itr6_19543_p.g140.t1
OG0004108	CSbapl.27486	itr6_743_pil.g1426_itr6_743_pil.g1426.t1
OG0004110	CSbapl.27499	itr6_1654_pi.g563_itr6_1654_pi.g563.t1
OG0004111	CSbapl.27530	itr6_2318_pi.g816_itr6_2318_pi.g816.t1
OG0004112	CSbapl.27569	itr6_3778_pi.g1912_itr6_3778_pi.g1913_itr6_3778_pi.g1912.t1_itr6_3778_pi.g1913.t1
OG0004124	CSbapl.27729	itr6_4569_pi.g348_itr6_4569_pi.g348.t1
OG0004138	CSbapl.27861	itr6_4319_pi.g886_itr6_4319_pi.g886.t1
OG0004148	CSbapl.2795	itr6_1145_pi.g2321_itr6_1145_pi.g2321.t1
OG0004155	CSbapl.28164	itr6_2074_pi.g2067_itr6_2074_pi.g2067.t1
OG0004157	CSbapl.28184	itr6_705_pil.g971_itr6_705_pil.g971.t1
OG0004158	CSbapl.28185	itr6_8276_pi.g168_itr6_8276_pi.g168.t1
OG0004159	CSbapl.28190	itr6_4272_pi.g563_itr6_4272_pi.g563.t1
OG0004160	CSbapl.28199	itr6_8518_pi.g128_itr6_8518_pi.g128.t1
OG0004162	CSbapl.28259	itr6_3782_pi.g1952_itr6_3782_pi.g1952.t1
OG0004168	CSbapl.2831	itr6_174_pil.g2200_itr6_174_pil.g2200.t1
OG0004172	CSbapl.2835	itr6_174_pil.g2198_itr6_174_pil.g2198.t1
OG0004176	CSbapl.2837	itr6_174_pil.g2197_itr6_174_pil.g2197.t1
OG0004179	CSbapl.2839	itr6_5601_pi.g442_itr6_5601_pi.g442.t1
OG0004180	CSbapl.2840	itr6_12703_p.g120_itr6_12703_p.g120.t1
OG0004183	CSbapl.28465	itr6_3486_pi.g2275_itr6_3486_pi.g2275.t1
OG0004186	CSbapl.28513	itr6_4567_pi.g340_itr6_4567_pi.g340.t1
OG0004187	CSbapl.28545	itr6_11071_p.g120_itr6_11071_p.g120.t1
OG0004188	CSbapl.2861	itr6_5320_pi.g605_itr6_5320_pi.g605.t1
OG0004198	CSbapl.2876	itr6_5949_pi.g492_itr6_5949_pi.g492.t1
OG0004203	CSbapl.28850	itr6_8830_pi.g120_itr6_8830_pi.g120.t1
OG0004204	CSbapl.28865	itr6_2685_pi.g1284_itr6_2685_pi.g1284.t1
OG0004207	CSbapl.28917	itr6_3285_pi.g612_itr6_3285_pi.g612.t1
OG0004208	CSbapl.28937	itr6_4990_pi.g916_itr6_4990_pi.g916.t1
OG0004209	CSbapl.28984	itr6_3454_pi.g2045_itr6_3454_pi.g2045.t1
OG0004210	CSbapl.28990	itr6_1853_pi.g3050_itr6_1853_pi.g3050.t1
OG0004216	CSbapl.29053	itr6_1777_pi.g2091_itr6_1777_pi.g2091.t1
OG0004218	CSbapl.29155	itr6_1032_pi.g923_itr6_1032_pi.g923.t1
OG0004219	CSbapl.29159	itr6_231_pil.g2862_itr6_231_pil.g2862.t1
OG0004233	CSbapl.2937	itr6_658_pil.g212_itr6_658_pil.g212.t1
OG0004242	CSbapl.29508	itr6_3758_pi.g1758_itr6_3758_pi.g1758.t1
OG0004243	CSbapl.29528	itr6_4711_pi.g1111_itr6_4711_pi.g1111.t1
OG0004247	CSbapl.2956	itr6_3628_pi.g724_itr6_3628_pi.g724.t1.1.57f6923f
OG0004248	CSbapl.2957	itr6_335_pil.g184_itr6_335_pil.g184.t1
OG0004251	CSbapl.29661	itr6_808_pil.g2417_itr6_808_pil.g2417.t1
OG0004258	CSbapl.29766	itr6_3927_pi.g577_itr6_3927_pi.g577.t1
OG0004261	CSbapl.29772	itr6_5959_pi.g520_itr6_5959_pi.g520.t1
OG0004270	CSbapl.29910	itr6_3094_pi.g2026_itr6_3094_pi.g2026.t1
OG0004277	CSbapl.29978	itr6_4207_pi.g196_itr6_4207_pi.g196.t1
OG0004282	CSbapl.3004	itr6_4832_pi.g111_itr6_4832_pi.g111.t1
OG0004284	CSbapl.30092	itr6_4380_pi.g1224_itr6_4380_pi.g1224.t1
OG0004285	CSbapl.30158	itr6_69_pilo.g932_itr6_69_pilo.g932.t1
OG0004286	CSbapl.30211	itr6_1953_pi.g414_itr6_1953_pi.g414.t1
OG0004287	CSbapl.30234	itr6_1974_pi.g666_itr6_1974_pi.g666.t1
OG0004290	CSbapl.303	itr6_2472_pi.g2453_itr6_2472_pi.g2453.t1
OG0004291	CSbapl.30309	itr6_524_pil.g2839_itr6_524_pil.g2839.t1
OG0004293	CSbapl.30316	itr6_1943_pi.g272_itr6_1943_pi.g272.t1
OG0004294	CSbapl.30318	itr6_4509_pi.g67_itr6_4509_pi.g67.t1
OG0004295	CSbapl.30319	itr6_4509_pi.g66_itr6_4509_pi.g66.t1
OG0004301	CSbapl.30403	itr6_1806_pi.g2455_itr6_1806_pi.g2455.t1
OG0004307	CSbapl.305	itr6_2255_pi.g76_itr6_2255_pi.g76.t1.1.57f6923d
OG0004320	CSbapl.30743	itr6_3776_pi.g1885_itr6_3776_pi.g1885.t1
OG0004327	CSbapl.309	itr6_5285_pi.g456_itr6_5285_pi.g456.t1
OG0004332	CSbapl.3099	itr6_1719_pi.g1246_itr6_1719_pi.g1246.t1
OG0004336	CSbapl.3103	itr6_15802_p.g53_itr6_15802_p.g53.t1
OG0004348	CSbapl.31225	itr6_537_pil.g3034_itr6_537_pil.g3034.t1
OG0004353	CSbapl.31313	itr6_2385_pi.g1497_itr6_2385_pi.g1497.t1
OG0004354	CSbapl.31315	itr6_3217_pi.g39_itr6_3217_pi.g39.t1
OG0004368	CSbapl.31714	itr6_5_pilon.g58_itr6_5_pilon.g58.t1
OG0004370	CSbapl.31738	itr6_116_pil.g1530_itr6_116_pil.g1530.t1
OG0004374	CSbapl.31844	itr6_2894_pi.g53_itr6_2894_pi.g53.t1
OG0004378	CSbapl.31936	itr6_12551_p.g13_itr6_12551_p.g13.t1
OG0004379	CSbapl.31963	itr6_3238_pi.g248_itr6_3238_pi.g248.t1
OG0004383	CSbapl.32084	itr6_2024_pi.g1283_itr6_2024_pi.g1283.t1
OG0004387	CSbapl.32171	itr6_2072_pi.g2013_itr6_2072_pi.g2013.t1
OG0004388	CSbapl.32174	itr6_2072_pi.g2012_itr6_2072_pi.g2012.t1
OG0004391	CSbapl.32201	itr6_3485_pi.g2250_itr6_3485_pi.g2250.t1
OG0004392	CSbapl.32228	itr6_3238_pi.g243_itr6_3238_pi.g243.t1
OG0004393	CSbapl.32237	itr6_4367_pi.g1126_itr6_4367_pi.g1126.t1
OG0004394	CSbapl.32240	itr6_3159_pi.g2584_itr6_3159_pi.g2584.t1
OG0004396	CSbapl.32245	itr6_1606_pi.g20_itr6_1606_pi.g20.t1
OG0004399	CSbapl.3228	itr6_2738_pi.g1833_itr6_2738_pi.g1833.t1
OG0004409	CSbapl.32434	itr6_393_pil.g1044_itr6_393_pil.g1044.t1
OG0004417	CSbapl.32629	itr6_1120_pi.g2104_itr6_1120_pi.g2104.t1
OG0004418	CSbapl.32630	itr6_1120_pi.g2105_itr6_1120_pi.g2105.t1
OG0004422	CSbapl.327	itr6_4317_pi.g859_itr6_4317_pi.g859.t1
OG0004426	CSbapl.3277	itr6_3188_pi.g2794_itr6_3188_pi.g2794.t1
OG0004428	CSbapl.3286	itr6_369_pil.g678_itr6_369_pil.g678.t1
OG0004431	CSbapl.32932	itr6_2798_pi.g2437_itr6_2798_pi.g2437.t1
OG0004432	CSbapl.32947	itr6_5797_pi.g50_itr6_5797_pi.g50.t1.1.57f69241
OG0004437	CSbapl.33119	itr6_30_pilo.g492_itr6_30_pilo.g492.t1
OG0004439	CSbapl.33180	itr6_9233_pi.g195_itr6_9233_pi.g195.t1
OG0004441	CSbapl.3322	itr6_2705_pi.g1477_itr6_2705_pi.g1477.t1
OG0004445	CSbapl.3338	itr6_3146_pi.g2481_itr6_3146_pi.g2481.t1
OG0004447	CSbapl.3342	itr6_86_pilo.g1126_itr6_86_pilo.g1126.t1
OG0004449	CSbapl.3345	itr6_1772_pi.g2006_itr6_1772_pi.g2006.t1
OG0004450	CSbapl.33467	itr6_1483_pi.g2559_itr6_1483_pi.g2559.t1
OG0004454	CSbapl.33560	itr6_1747_pi.g1696_itr6_1747_pi.g1696.t1
OG0004455	CSbapl.33562	itr6_15823_p.g72_itr6_15823_p.g72.t1
OG0004456	CSbapl.33567	itr6_2074_pi.g2075_itr6_2074_pi.g2075.t1
OG0004457	CSbapl.3358	itr6_1534_pi.g3157_itr6_1534_pi.g3157.t1
OG0004461	CSbapl.33667	itr6_60_pilo.g866_itr6_60_pilo.g866.t1
OG0004464	CSbapl.33787	itr6_3068_pi.g1845_itr6_3068_pi.g1845.t1
OG0004476	CSbapl.34015	itr6_2978_pi.g835_itr6_2978_pi.g835.t1
OG0004477	CSbapl.3404	itr6_2648_pi.g897_itr6_2648_pi.g897.t1
OG0004491	CSbapl.34188	itr6_3846_pi.g2454_itr6_3846_pi.g2454.t1
OG0004502	CSbapl.34384	itr6_11162_p.g193_itr6_11162_p.g193.t1
OG0004503	CSbapl.34421	itr6_777_pil.g1894_itr6_777_pil.g1894.t1
OG0004504	CSbapl.34425	itr6_6202_pi.g234_itr6_6202_pi.g234.t1
OG0004507	CSbapl.34442	itr6_3020_pi.g1291_itr6_3020_pi.g1291.t1
OG0004508	CSbapl.34469	itr6_10398_p.g84_itr6_10398_p.g84.t1
OG0004510	CSbapl.34548	itr6_2393_pi.g1570_itr6_2393_pi.g1570.t1
OG0004512	CSbapl.34590	itr6_9141_pi.g115_itr6_9141_pi.g115.t1
OG0004517	CSbapl.34742	itr6_5034_pi.g1096_itr6_5034_pi.g1096.t1
OG0004527	CSbapl.35016	itr6_3530_pi.g2648_itr6_3530_pi.g2648.t1
OG0004528	CSbapl.35021	itr6_1648_pi.g471_itr6_1648_pi.g471.t1
OG0004529	CSbapl.3503	itr6_6268_pi.g419_itr6_6268_pi.g419.t1
OG0004533	CSbapl.35064	itr6_2253_pi.g59_itr6_2253_pi.g59.t1
OG0004546	CSbapl.35333	itr6_7882_pi.g161_itr6_7882_pi.g161.t1.1.57f69242
OG0004553	CSbapl.35508	itr6_2594_pi.g248_itr6_2594_pi.g248.t1
OG0004555	CSbapl.35512	itr6_4714_pi.g1142_itr6_4714_pi.g1142.t1
OG0004556	CSbapl.35546	itr6_4809_pi.g1623_itr6_4809_pi.g1623.t1
OG0004557	CSbapl.35561	itr6_1737_pi.g1503_itr6_1737_pi.g1503.t1
OG0004558	CSbapl.35562	itr6_1737_pi.g1504_itr6_1737_pi.g1504.t1
OG0004564	CSbapl.35705	itr6_1738_pi.g1520_itr6_1738_pi.g1520.t1
OG0004565	CSbapl.35758	itr6_748_pil.g1529_itr6_748_pil.g1529.t1
OG0004575	CSbapl.35895	itr6_5340_pi.g661_itr6_5340_pi.g661.t1
OG0004577	CSbapl.35927	itr6_1478_pi.g2541_itr6_1478_pi.g2541.t1
OG0004578	CSbapl.3594	itr6_1729_pi.g1409_itr6_1729_pi.g1409.t1
OG0004579	CSbapl.35956	itr6_1988_pi.g848_itr6_1988_pi.g848.t1
OG0004580	CSbapl.35959	itr6_4290_pi.g708_itr6_4290_pi.g708.t1
OG0004582	CSbapl.36045	itr6_6565_pi.g228_itr6_6565_pi.g228.t1
OG0004583	CSbapl.3605	itr6_47_pilo.g685_itr6_47_pilo.g685.t1
OG0004584	CSbapl.3606	itr6_2443_pi.g2007_itr6_2443_pi.g2007.t1
OG0004586	CSbapl.36098	itr6_1446_pi.g2083_itr6_1446_pi.g2083.t1
OG0004587	CSbapl.3611	itr6_2443_pi.g2004_itr6_2443_pi.g2004.t1
OG0004590	CSbapl.36226	itr6_3197_pi.g2849_itr6_3197_pi.g2849.t1
OG0004591	CSbapl.36238	itr6_1370_pi.g1121_itr6_1370_pi.g1121.t1
OG0004597	CSbapl.36274	itr6_6982_pi.g154_itr6_6982_pi.g154.t1
OG0004602	CSbapl.36295	itr6_4779_pi.g1508_itr6_4779_pi.g1508.t1
OG0004603	CSbapl.36324	itr6_2088_pi.g2247_itr6_2088_pi.g2247.t1
OG0004604	CSbapl.36369	itr6_17991_p.g14_itr6_17991_p.g14.t1
OG0004607	CSbapl.36414	itr6_225_pil.g2834_itr6_225_pil.g2834.t1
OG0004610	CSbapl.36553	itr6_435_pil.g1538_itr6_435_pil.g1538.t1
OG0004611	CSbapl.36569	itr6_656_pil.g191_itr6_656_pil.g191.t1
OG0004617	CSbapl.36667	itr6_1313_pi.g360_itr6_1313_pi.g360.t1
OG0004619	CSbapl.36711	itr6_2945_pi.g593_itr6_2945_pi.g593.t1
OG0004620	CSbapl.36718	itr6_2537_pi.g3199_itr6_2537_pi.g3199.t1
OG0004622	CSbapl.36766	itr6_544_pil.g3139_itr6_544_pil.g3139.t1
OG0004624	CSbapl.36803	itr6_350_pil.g334_itr6_350_pil.g334.t1
OG0004626	CSbapl.36809	itr6_790_pil.g2020_itr6_790_pil.g2020.t1
OG0004629	CSbapl.36844	itr6_231_pil.g2861_itr6_231_pil.g2861.t1
OG0004637	CSbapl.37	itr6_86_pilo.g1116_itr6_86_pilo.g1116.t1
OG0004638	CSbapl.3700	itr6_1063_pi.g1396_itr6_1063_pi.g1396.t1
OG0004646	CSbapl.37123	itr6_4205_pi.g178_itr6_4205_pi.g178.t1
OG0004647	CSbapl.37124	itr6_1030_pi.g905_itr6_1030_pi.g905.t1
OG0004649	CSbapl.37185	itr6_359_pil.g507_itr6_359_pil.g507.t1
OG0004650	CSbapl.37198	itr6_359_pil.g515_itr6_359_pil.g515.t1
OG0004660	CSbapl.3743	itr6_6098_pi.g929_itr6_6098_pi.g929.t1
OG0004663	CSbapl.37509	itr6_4847_pi.g186_itr6_4847_pi.g186.t1
OG0004666	CSbapl.37559	itr6_1285_pi.g5_itr6_1285_pi.g5.t1
OG0004667	CSbapl.37563	itr6_2746_pi.g1903_itr6_2746_pi.g1903.t1
OG0004668	CSbapl.37640	itr6_1173_pi.g2671_itr6_1173_pi.g2671.t1
OG0004671	CSbapl.37680	itr6_17947_p.g151_itr6_17947_p.g151.t1
OG0004672	CSbapl.37694	itr6_3325_pi.g937_itr6_3325_pi.g937.t1
OG0004678	CSbapl.37893	itr6_76_pilo.g977_itr6_76_pilo.g977.t1
OG0004679	CSbapl.37935	itr6_1943_pi.g289_itr6_1943_pi.g289.t1
OG0004682	CSbapl.37994	itr6_4461_pi.g1621_itr6_4461_pi.g1621.t1
OG0004693	CSbapl.38246	itr6_3305_pi.g749_itr6_3305_pi.g749.t1
OG0004696	CSbapl.3833	itr6_3993_pi.g935_itr6_3993_pi.g935.t1
OG0004697	CSbapl.38356	itr6_421_pil.g1340_itr6_421_pil.g1340.t1
OG0004698	CSbapl.38404	itr6_2132_pi.g2780_itr6_2132_pi.g2780.t1
OG0004699	CSbapl.38419	itr6_167_pil.g2104_itr6_167_pil.g2104.t1
OG0004708	CSbapl.38618	itr6_2455_pi.g2158_itr6_2455_pi.g2158.t1
OG0004713	CSbapl.38717	itr6_5581_pi.g374_itr6_5581_pi.g374.t1
OG0004716	CSbapl.3876	itr6_3229_pi.g160_itr6_3229_pi.g160.t1
OG0004717	CSbapl.38767	itr6_768_pil.g1813_itr6_768_pil.g1813.t1
OG0004721	CSbapl.38792	itr6_1534_pi.g3163_itr6_1534_pi.g3163.t1
OG0004722	CSbapl.3882	itr6_1092_pi.g1728_itr6_1092_pi.g1728.t1
OG0004726	CSbapl.38898	itr6_1829_pi.g2766_itr6_1829_pi.g2766.t1
OG0004728	CSbapl.38910	itr6_705_pil.g999_itr6_705_pil.g999.t1
OG0004729	CSbapl.3892	itr6_4763_pi.g1439_itr6_4763_pi.g1439.t1
OG0004736	CSbapl.39004	itr6_5267_pi.g413_itr6_5267_pi.g413.t1
OG0004737	CSbapl.39007	itr6_4835_pi.g121_itr6_4835_pi.g121.t1
OG0004739	CSbapl.39045	itr6_3778_pi.g1896_itr6_3778_pi.g1896.t1
OG0004745	CSbapl.3925	itr6_2415_pi.g1766_itr6_2415_pi.g1766.t1
OG0004748	CSbapl.3929	itr6_3770_pi.g1855_itr6_3770_pi.g1855.t1
OG0004756	CSbapl.39643	itr6_5232_pi.g283_itr6_5232_pi.g283.t1
OG0004757	CSbapl.39650	itr6_6952_pi.g139_itr6_6952_pi.g139.t1
OG0004762	CSbapl.3973	itr6_2827_pi.g2713_itr6_2827_pi.g2713.t1
OG0004764	CSbapl.39759	itr6_10318_p.g27_itr6_10318_p.g27.t1
OG0004765	CSbapl.39766	itr6_98_pilo.g1361_itr6_98_pilo.g1361.t1
OG0004766	CSbapl.39767	itr6_12103_p.g125_itr6_12103_p.g125.t1
OG0004769	CSbapl.39785	itr6_225_pil.g2824_itr6_225_pil.g2824.t1
OG0004770	CSbapl.39806	itr6_679_pil.g465_itr6_679_pil.g465.t1
OG0004773	CSbapl.39955	itr6_12884_p.g30_itr6_12884_p.g30.t1
OG0004774	CSbapl.3996	itr6_105_pil.g1448_itr6_105_pil.g1448.t1
OG0004777	CSbapl.40007	itr6_841_pil.g2867_itr6_841_pil.g2867.t1
OG0004778	CSbapl.4010	itr6_4509_pi.g61_itr6_4509_pi.g61.t1
OG0004780	CSbapl.40150	itr6_2699_pi.g1410_itr6_2699_pi.g1412_itr6_2699_pi.g1413_itr6_2699_pi.g1414_itr6_2699_pi.g1410.t1_itr6_2699_pi.g1412.t1_itr6_2699_pi.g1413.t1_itr6_2699_pi.g1414.t1
OG0004781	CSbapl.40162	itr6_2699_pi.g1410_itr6_2699_pi.g1412_itr6_2699_pi.g1413_itr6_2699_pi.g1414_itr6_2699_pi.g1410.t1_itr6_2699_pi.g1412.t1_itr6_2699_pi.g1413.t1_itr6_2699_pi.g1414.t1.1.57f6f332
OG0004783	CSbapl.40261	itr6_4315_pi.g840_itr6_4315_pi.g840.t1
OG0004787	CSbapl.40293	itr6_1145_pi.g2317_itr6_1145_pi.g2317.t1
OG0004795	CSbapl.40470	itr6_1060_pi.g1352_itr6_1060_pi.g1352.t1
OG0004797	CSbapl.40570	itr6_1057_pi.g1258_itr6_1057_pi.g1258.t1
OG0004798	CSbapl.4064	itr6_851_pil.g3063_itr6_851_pil.g3063.t1
OG0004799	CSbapl.40651	itr6_3330_pi.g978_itr6_3330_pi.g978.t1
OG0004801	CSbapl.40680	itr6_1486_pi.g2654_itr6_1486_pi.g2654.t1
OG0004813	CSbapl.41032	itr6_4116_pi.g1496_itr6_4116_pi.g1498_itr6_4116_pi.g1496.t1_itr6_4116_pi.g1498.t1.2.57f6f334
OG0004816	CSbapl.41089	itr6_2872_pi.g3064_itr6_2872_pi.g3064.t1
OG0004817	CSbapl.41111	itr6_1317_pi.g394_itr6_1317_pi.g394.t1
OG0004824	CSbapl.41209	itr6_4273_pi.g566_itr6_4273_pi.g566.t1
OG0004829	CSbapl.41329	itr6_348_pil.g310_itr6_348_pil.g310.t1
OG0004830	CSbapl.4134	itr6_2084_pi.g2190_itr6_2084_pi.g2190.t1
OG0004831	CSbapl.41341	itr6_10294_p.g16_itr6_10294_p.g16.t1
OG0004833	CSbapl.41404	itr6_2289_pi.g494_itr6_2289_pi.g494.t1
OG0004839	CSbapl.41505	itr6_1300_pi.g142_itr6_1300_pi.g142.t1
OG0004840	CSbapl.4163	itr6_2084_pi.g2188_itr6_2084_pi.g2188.t1
OG0004844	CSbapl.41757	itr6_6818_pi.g44_itr6_6818_pi.g44.t1
OG0004845	CSbapl.41758	itr6_5119_pi.g1411_itr6_5119_pi.g1411.t1
OG0004846	CSbapl.41767	itr6_4632_pi.g691_itr6_4632_pi.g691.t1
OG0004852	CSbapl.41898	itr6_746_pil.g1488_itr6_746_pil.g1488.t1
OG0004856	CSbapl.41924	itr6_3886_pi.g286_itr6_3886_pi.g286.t1
OG0004859	CSbapl.42034	itr6_17817_p.g90_itr6_17817_p.g90.t1
OG0004860	CSbapl.42070	itr6_724_pil.g1230_itr6_724_pil.g1230.t1
OG0004861	CSbapl.42075	itr6_1432_pi.g1865_itr6_1432_pi.g1865.t1
OG0004862	CSbapl.4208	itr6_1676_pi.g814_itr6_1676_pi.g814.t1
OG0004870	CSbapl.42142	itr6_322_pil.g5_itr6_322_pil.g5.t1
OG0004874	CSbapl.4221	itr6_34_pilo.g507_itr6_34_pilo.g507.t1
OG0004875	CSbapl.42214	itr6_9521_pi.g177_itr6_9521_pi.g177.t1
OG0004876	CSbapl.42244	itr6_8177_pi.g88_itr6_8177_pi.g88.t1
OG0004877	CSbapl.42258	itr6_8645_pi.g232_itr6_8645_pi.g232.t1
OG0004878	CSbapl.4227	itr6_383_pil.g841_itr6_383_pil.g841.t1
OG0004880	CSbapl.42312	itr6_41_pilo.g563_itr6_41_pilo.g563.t1
OG0004884	CSbapl.4237	itr6_1089_pi.g1672_itr6_1089_pi.g1672.t1
OG0004885	CSbapl.42400	itr6_706_pil.g1010_itr6_706_pil.g1010.t1
OG0004886	CSbapl.42428	itr6_4123_pi.g1535_itr6_4123_pi.g1535.t1
OG0004890	CSbapl.42469	itr6_2277_pi.g308_itr6_2277_pi.g308.t1
OG0004891	CSbapl.42471	itr6_11401_p.g114_itr6_11401_p.g114.t1
OG0004893	CSbapl.42546	itr6_41_pilo.g562_itr6_41_pilo.g562.t1
OG0004896	CSbapl.42569	itr6_467_pil.g1977_itr6_467_pil.g1977.t1
OG0004897	CSbapl.4257	itr6_1522_pi.g3067_itr6_1522_pi.g3067.t1
OG0004902	CSbapl.42618	itr6_3508_pi.g2450_itr6_3508_pi.g2450.t1
OG0004904	CSbapl.42659	itr6_14481_p.g24_itr6_14481_p.g24.t1
OG0004906	CSbapl.4267	itr6_1328_pi.g505_itr6_1328_pi.g505.t1
OG0004907	CSbapl.42707	itr6_2881_pi.g3219_itr6_2881_pi.g3219.t1
OG0004908	CSbapl.42708	itr6_4889_pi.g440_itr6_4889_pi.g440.t1
OG0004909	CSbapl.42757	itr6_1436_pi.g1940_itr6_1436_pi.g1940.t1
OG0004910	CSbapl.42775	itr6_3794_pi.g2028_itr6_3794_pi.g2028.t1
OG0004911	CSbapl.42782	itr6_4648_pi.g767_itr6_4648_pi.g767.t1
OG0004912	CSbapl.4280	itr6_2665_pi.g1071_itr6_2665_pi.g1071.t1
OG0004914	CSbapl.42892	itr6_4759_pi.g1404_itr6_4759_pi.g1404.t1
OG0004918	CSbapl.4299	itr6_1658_pi.g612_itr6_1658_pi.g612.t1
OG0004925	CSbapl.43108	itr6_840_pil.g2861_itr6_840_pil.g2861.t1
OG0004932	CSbapl.43359	itr6_692_pil.g675_itr6_692_pil.g675.t1
OG0004937	CSbapl.43403	itr6_513_pil.g2620_itr6_513_pil.g2620.t1
OG0004938	CSbapl.4341	itr6_2104_pi.g2378_itr6_2104_pi.g2378.t1
OG0004947	CSbapl.4347	itr6_2104_pi.g2387_itr6_2104_pi.g2387.t1
OG0004949	CSbapl.43489	itr6_1325_pi.g457_itr6_1325_pi.g457.t1
OG0004950	CSbapl.43526	itr6_802_pil.g2329_itr6_802_pil.g2329.t1
OG0004951	CSbapl.43532	itr6_5120_pi.g1416_itr6_5120_pi.g1416.t1
OG0004952	CSbapl.4356	itr6_375_pil.g721_itr6_375_pil.g721.t1
OG0004957	CSbapl.4368	itr6_6323_pi.g553_itr6_6323_pi.g553.t1
OG0004958	CSbapl.43682	itr6_1320_pi.g412_itr6_1320_pi.g412.t1
OG0004959	CSbapl.43695	itr6_438_pil.g1591_itr6_438_pil.g1591.t1
OG0004961	CSbapl.43709	itr6_2857_pi.g2967_itr6_2857_pi.g2967.t1
OG0004965	CSbapl.43877	itr6_39_pilo.g538_itr6_39_pilo.g538.t1
OG0004967	CSbapl.43898	itr6_4151_pi.g1696_itr6_4151_pi.g1696.t1
OG0004969	CSbapl.43922	itr6_4127_pi.g1578_itr6_4127_pi.g1578.t1
OG0004970	CSbapl.43924	itr6_3143_pi.g2451_itr6_3143_pi.g2451.t1
OG0004979	CSbapl.44019	itr6_3309_pi.g785_itr6_3309_pi.g785.t1
OG0004980	CSbapl.44028	itr6_3067_pi.g1827_itr6_3067_pi.g1827.t1
OG0004981	CSbapl.44071	itr6_455_pil.g1790_itr6_455_pil.g1790.t1
OG0004982	CSbapl.44094	itr6_3752_pi.g1716_itr6_3752_pi.g1716.t1
OG0004985	CSbapl.44234	itr6_7340_pi.g219_itr6_7340_pi.g219.t1
OG0004987	CSbapl.44254	itr6_2143_pi.g2874_itr6_2143_pi.g2874.t1
OG0004988	CSbapl.44265	itr6_121_pil.g1586_itr6_121_pil.g1586.t1
OG0004996	CSbapl.44364	itr6_2024_pi.g1259_itr6_2024_pi.g1259.t1
OG0004997	CSbapl.44409	itr6_2507_pi.g2859_itr6_2507_pi.g2859.t1
OG0004998	CSbapl.4443	itr6_6557_pi.g223_itr6_6557_pi.g223.t1.2.57f69241
OG0005000	CSbapl.4445	itr6_480_pil.g2167_itr6_480_pil.g2167.t1
OG0005001	CSbapl.44501	itr6_1967_pi.g593_itr6_1967_pi.g593.t1
OG0005005	CSbapl.44574	itr6_1297_pi.g121_itr6_1297_pi.g121.t1
OG0005007	CSbapl.44599	itr6_2930_pi.g409_itr6_2930_pi.g409.t1
OG0005009	CSbapl.44715	itr6_4777_pi.g1496_itr6_4777_pi.g1496.t1
OG0005012	CSbapl.44819	itr6_6726_pi.g336_itr6_6726_pi.g336.t1
OG0005014	CSbapl.44864	itr6_5762_pi.g1056_itr6_5762_pi.g1056.t1
OG0005015	CSbapl.44967	itr6_1297_pi.g120_itr6_1297_pi.g120.t1
OG0005020	CSbapl.45058	itr6_1108_pi.g1917_itr6_1108_pi.g1917.t1
OG0005021	CSbapl.4513	itr6_3420_pi.g1683_itr6_3420_pi.g1683.t1
OG0005025	CSbapl.45158	itr6_679_pil.g461_itr6_679_pil.g461.t1
OG0005027	CSbapl.45199	itr6_683_pil.g543_itr6_683_pil.g543.t1
OG0005028	CSbapl.45200	itr6_4863_pi.g276_itr6_4863_pi.g276.t1
OG0005029	CSbapl.45204	itr6_3440_pi.g1883_itr6_3440_pi.g1883.t1
OG0005030	CSbapl.45219	itr6_49_pilo.g716_itr6_49_pilo.g716.t1
OG0005031	CSbapl.45338	itr6_6_pilon.g86_itr6_6_pilon.g86.t1
OG0005037	CSbapl.45455	itr6_10988_p.g51_itr6_10988_p.g51.t1
OG0005039	CSbapl.45494	itr6_5186_pi.g131_itr6_5186_pi.g131.t1
OG0005042	CSbapl.45617	itr6_3006_pi.g1142_itr6_3006_pi.g1142.t1
OG0005044	CSbapl.45683	itr6_537_pil.g3062_itr6_537_pil.g3062.t1
OG0005045	CSbapl.45685	itr6_3368_pi.g1307_itr6_3368_pi.g1307.t1
OG0005050	CSbapl.45717	itr6_732_pil.g1325_itr6_732_pil.g1325.t1
OG0005052	CSbapl.45771	itr6_3368_pi.g1305_itr6_3368_pi.g1305.t1
OG0005056	CSbapl.45832	itr6_2326_pi.g901_itr6_2326_pi.g901.t1
OG0005057	CSbapl.45833	itr6_5906_pi.g358_itr6_5906_pi.g358.t1
OG0005060	CSbapl.45852	itr6_4795_pi.g1577_itr6_4795_pi.g1578_itr6_4795_pi.g1577.t1_itr6_4795_pi.g1578.t1
OG0005064	CSbapl.45872	itr6_2747_pi.g1927_itr6_2747_pi.g1927.t1
OG0005068	CSbapl.45905	itr6_95_pilo.g1291_itr6_95_pilo.g1291.t1
OG0005074	CSbapl.45985	itr6_692_pil.g709_itr6_692_pil.g709.t1
OG0005082	CSbapl.46071	itr6_3617_pi.g640_itr6_3617_pi.g640.t1
OG0005084	CSbapl.46141	itr6_2334_pi.g992_itr6_2334_pi.g992.t1
OG0005086	CSbapl.46193	itr6_1999_pi.g994_itr6_1999_pi.g994.t1
OG0005087	CSbapl.46220	itr6_1337_pi.g685_itr6_1337_pi.g685.t1
OG0005092	CSbapl.4632	itr6_8911_pi.g199_itr6_8911_pi.g199.t1
OG0005093	CSbapl.46338	itr6_673_pil.g391_itr6_673_pil.g391.t1
OG0005099	CSbapl.46572	itr6_3026_pi.g1381_itr6_3026_pi.g1381.t1
OG0005103	CSbapl.46653	itr6_4576_pi.g393_itr6_4576_pi.g393.t1
OG0005104	CSbapl.46663	itr6_1954_pi.g439_itr6_1954_pi.g439.t1
OG0005105	CSbapl.4670	itr6_4400_pi.g1354_itr6_4400_pi.g1354.t1
OG0005107	CSbapl.46743	itr6_86_pilo.g1107_itr6_86_pilo.g1107.t1
OG0005108	CSbapl.4677	itr6_5009_pi.g994_itr6_5009_pi.g994.t1
OG0005109	CSbapl.46814	itr6_1474_pi.g2512_itr6_1474_pi.g2512.t1
OG0005111	CSbapl.46887	itr6_1829_pi.g2771_itr6_1829_pi.g2771.t1
OG0005114	CSbapl.46906	itr6_4153_pi.g1703_itr6_4153_pi.g1703.t1
OG0005120	CSbapl.46920	itr6_3846_pi.g2445_itr6_3846_pi.g2445.t1
OG0005123	CSbapl.46931	itr6_3400_pi.g1576_itr6_3400_pi.g1576.t1
OG0005124	CSbapl.46933	itr6_3400_pi.g1583_itr6_3400_pi.g1583.t1
OG0005131	CSbapl.47011	itr6_1464_pi.g2378_itr6_1464_pi.g2378.t1
OG0005132	CSbapl.47015	itr6_34_pilo.g516_itr6_34_pilo.g516.t1
OG0005133	CSbapl.47050	itr6_4862_pi.g266_itr6_4862_pi.g266.t1
OG0005134	CSbapl.47075	itr6_3504_pi.g2402_itr6_3504_pi.g2402.t1
OG0005138	CSbapl.47147	itr6_761_pil.g1772_itr6_761_pil.g1772.t1
OG0005139	CSbapl.47154	itr6_4212_pi.g219_itr6_4212_pi.g223_itr6_4212_pi.g219.t1_itr6_4212_pi.g223.t1
OG0005140	CSbapl.47162	itr6_2275_pi.g278_itr6_2275_pi.g278.t1
OG0005141	CSbapl.47215	itr6_2691_pi.g1331_itr6_2691_pi.g1331.t1
OG0005143	CSbapl.47235	itr6_3623_pi.g674_itr6_3623_pi.g674.t1
OG0005144	CSbapl.47239	itr6_1436_pi.g1938_itr6_1436_pi.g1938.t1.1.57f6923c
OG0005146	CSbapl.47280	itr6_3702_pi.g1350_itr6_3702_pi.g1350.t1
OG0005150	CSbapl.47388	itr6_17037_p.g23_itr6_17037_p.g23.t1
OG0005151	CSbapl.47454	itr6_2630_pi.g620_itr6_2630_pi.g620.t1
OG0005152	CSbapl.47457	itr6_5387_pi.g822_itr6_5387_pi.g822.t1
OG0005153	CSbapl.47506	itr6_2336_pi.g1023_itr6_2336_pi.g1023.t1
OG0005154	CSbapl.47588	itr6_799_pil.g2263_itr6_799_pil.g2263.t1
OG0005155	CSbapl.47594	itr6_6390_pi.g712_itr6_6390_pi.g712.t1
OG0005157	CSbapl.47638	itr6_1457_pi.g2298_itr6_1457_pi.g2298.t1.1.57f6923c
OG0005158	CSbapl.47658	itr6_786_pil.g2002_itr6_786_pil.g2002.t1
OG0005159	CSbapl.47679	itr6_2781_pi.g2214_itr6_2781_pi.g2214.t1
OG0005160	CSbapl.4768	itr6_16316_p.g141_itr6_16316_p.g141.t1
OG0005161	CSbapl.4772	itr6_1407_pi.g1566_itr6_1407_pi.g1566.t1
OG0005166	CSbapl.47799	itr6_508_pil.g2543_itr6_508_pil.g2543.t1
OG0005167	CSbapl.478	itr6_415_pil.g1259_itr6_415_pil.g1259.t1.3.57f69240
OG0005173	CSbapl.47868	itr6_3959_pi.g786_itr6_3959_pi.g786.t1
OG0005176	CSbapl.47947	itr6_8993_pi.g1_itr6_8993_pi.g1.t1
OG0005177	CSbapl.47956	itr6_2086_pi.g2222_itr6_2086_pi.g2222.t1
OG0005178	CSbapl.47985	itr6_2665_pi.g1085_itr6_2665_pi.g1085.t1
OG0005179	CSbapl.48	itr6_645_pil.g29_itr6_645_pil.g29.t1
OG0005180	CSbapl.48053	itr6_6_pilon.g100_itr6_6_pilon.g100.t1
OG0005183	CSbapl.4808	itr6_2153_pi.g2936_itr6_2153_pi.g2936.t1
OG0005185	CSbapl.48167	itr6_2442_pi.g2000_itr6_2442_pi.g2000.t1
OG0005189	CSbapl.48259	itr6_3263_pi.g413_itr6_3263_pi.g413.t1
OG0005190	CSbapl.48276	itr6_4584_pi.g420_itr6_4584_pi.g420.t1
OG0005191	CSbapl.48277	itr6_4584_pi.g426_itr6_4584_pi.g426.t1
OG0005193	CSbapl.48321	itr6_8362_pi.g20_itr6_8362_pi.g20.t1
OG0005194	CSbapl.4834	itr6_4484_pi.g1725_itr6_4484_pi.g1725.t1
OG0005196	CSbapl.48373	itr6_2362_pi.g1318_itr6_2362_pi.g1318.t1
OG0005197	CSbapl.48375	itr6_1290_pi.g59_itr6_1290_pi.g59.t1
OG0005198	CSbapl.48381	itr6_2157_pi.g2962_itr6_2157_pi.g2962.t1
OG0005199	CSbapl.48423	itr6_4703_pi.g1066_itr6_4703_pi.g1066.t1
OG0005200	CSbapl.48428	itr6_3776_pi.g1878_itr6_3776_pi.g1878.t1
OG0005201	CSbapl.48452	itr6_798_pil.g2220_itr6_798_pil.g2220.t1
OG0005202	CSbapl.48475	itr6_4374_pi.g1190_itr6_4374_pi.g1190.t1
OG0005203	CSbapl.48517	itr6_1139_pi.g2231_itr6_1139_pi.g2231.t1
OG0005218	CSbapl.48647	itr6_5904_pi.g343_itr6_5904_pi.g343.t1
OG0005219	CSbapl.48699	itr6_5259_pi.g369_itr6_5259_pi.g369.t1
OG0005221	CSbapl.48728	itr6_523_pil.g2822_itr6_523_pil.g2822.t1
OG0005222	CSbapl.48730	itr6_11330_p.g60_itr6_11330_p.g60.t1
OG0005223	CSbapl.48733	itr6_4058_pi.g1196_itr6_4058_pi.g1196.t1
OG0005224	CSbapl.48752	itr6_5937_pi.g446_itr6_5937_pi.g446.t1
OG0005227	CSbapl.48850	itr6_16573_p.g138_itr6_16573_p.g138.t1
OG0005228	CSbapl.48856	itr6_4126_pi.g1573_itr6_4126_pi.g1573.t1
OG0005229	CSbapl.48862	itr6_3423_pi.g1705_itr6_3423_pi.g1705.t1
OG0005230	CSbapl.48878	itr6_2880_pi.g3195_itr6_2880_pi.g3195.t1
OG0005231	CSbapl.48885	itr6_3330_pi.g974_itr6_3330_pi.g974.t1
OG0005232	CSbapl.48894	itr6_4147_pi.g1680_itr6_4147_pi.g1680.t1
OG0005234	CSbapl.48920	itr6_3544_pi.g81_itr6_3544_pi.g81.t1
OG0005235	CSbapl.48933	itr6_1030_pi.g903_itr6_1030_pi.g903.t1
OG0005236	CSbapl.48961	itr6_479_pil.g2117_itr6_479_pil.g2117.t1
OG0005237	CSbapl.48971	itr6_479_pil.g2116_itr6_479_pil.g2116.t1
OG0005241	CSbapl.49005	itr6_823_pil.g2631_itr6_823_pil.g2631.t1
OG0005242	CSbapl.49008	itr6_2062_pi.g1915_itr6_2062_pi.g1915.t1
OG0005244	CSbapl.49026	itr6_445_pil.g1669_itr6_445_pil.g1669.t1
OG0005245	CSbapl.49033	itr6_1766_pi.g1871_itr6_1766_pi.g1871.t1
OG0005247	CSbapl.49062	itr6_778_pil.g1920_itr6_778_pil.g1920.t1
OG0005248	CSbapl.49080	itr6_5370_pi.g765_itr6_5370_pi.g765.t1
OG0005250	CSbapl.49207	itr6_3981_pi.g868_itr6_3981_pi.g868.t1
OG0005251	CSbapl.49228	itr6_2929_pi.g374_itr6_2929_pi.g374.t1
OG0005253	CSbapl.49366	itr6_4532_pi.g164_itr6_4532_pi.g164.t1
OG0005257	CSbapl.49450	itr6_3712_pi.g1407_itr6_3712_pi.g1407.t1
OG0005258	CSbapl.4946	itr6_1954_pi.g437_itr6_1954_pi.g437.t1
OG0005262	CSbapl.49542	itr6_1341_pi.g745_itr6_1341_pi.g745.t1
OG0005265	CSbapl.49660	itr6_2891_pi.g19_itr6_2891_pi.g19.t1
OG0005266	CSbapl.49666	itr6_2891_pi.g9_itr6_2891_pi.g9.t1
OG0005270	CSbapl.49802	itr6_2074_pi.g2051_itr6_2074_pi.g2051.t1
OG0005272	CSbapl.49812	itr6_2658_pi.g973_itr6_2658_pi.g973.t1
OG0005273	CSbapl.49841	itr6_5881_pi.g285_itr6_5881_pi.g285.t1
OG0005274	CSbapl.49851	itr6_12138_p.g153_itr6_12138_p.g153.t1
OG0005276	CSbapl.49933	itr6_4421_pi.g1446_itr6_4421_pi.g1446.t1
OG0005277	CSbapl.49940	itr6_4421_pi.g1441_itr6_4421_pi.g1441.t1
OG0005278	CSbapl.49986	itr6_2756_pi.g2007_itr6_2756_pi.g2007.t1
OG0005279	CSbapl.49995	itr6_5199_pi.g172_itr6_5199_pi.g172.t1
OG0005281	CSbapl.5002	itr6_45_pilo.g623_itr6_45_pilo.g623.t1
OG0005283	CSbapl.5004	itr6_45_pilo.g624_itr6_45_pilo.g624.t1
OG0005286	CSbapl.50078	itr6_2301_pi.g611_itr6_2301_pi.g611.t1
OG0005287	CSbapl.50086	itr6_4967_pi.g808_itr6_4967_pi.g808.t1
OG0005288	CSbapl.50090	itr6_5344_pi.g685_itr6_5344_pi.g685.t1
OG0005290	CSbapl.50175	itr6_4317_pi.g872_itr6_4317_pi.g872.t1
OG0005291	CSbapl.50180	itr6_4689_pi.g966_itr6_4689_pi.g966.t1
OG0005292	CSbapl.50186	itr6_1205_pi.g2974_itr6_1205_pi.g2974.t1
OG0005293	CSbapl.50187	itr6_1205_pi.g2973_itr6_1205_pi.g2973.t1
OG0005294	CSbapl.50218	itr6_849_pil.g3041_itr6_849_pil.g3041.t1
OG0005296	CSbapl.5023	itr6_1954_pi.g426_itr6_1954_pi.g426.t1
OG0005298	CSbapl.50241	itr6_2116_pi.g2643_itr6_2116_pi.g2643.t1
OG0005299	CSbapl.50272	itr6_2116_pi.g2601_itr6_2116_pi.g2601.t1
OG0005300	CSbapl.50325	itr6_1140_pi.g2265_itr6_1140_pi.g2265.t1.1.57f6923b
OG0005308	CSbapl.50476	itr6_1497_pi.g2716_itr6_1497_pi.g2716.t1
OG0005310	CSbapl.505	itr6_402_pil.g1108_itr6_402_pil.g1108.t1
OG0005311	CSbapl.50500	itr6_3814_pi.g2156_itr6_3814_pi.g2156.t1
OG0005312	CSbapl.50505	itr6_7448_pi.g58_itr6_7448_pi.g58.t1
OG0005313	CSbapl.50511	itr6_2502_pi.g2789_itr6_2502_pi.g2789.t1
OG0005315	CSbapl.5055	itr6_991_pil.g321_itr6_991_pil.g321.t1
OG0005328	CSbapl.50636	itr6_9862_pi.g166_itr6_9862_pi.g166.t1
OG0005329	CSbapl.50712	itr6_27_pilo.g464_itr6_27_pilo.g464.t1
OG0005330	CSbapl.50722	itr6_3220_pi.g48_itr6_3220_pi.g48.t1
OG0005332	CSbapl.50756	itr6_3635_pi.g798_itr6_3635_pi.g798.t1
OG0005333	CSbapl.50758	itr6_3483_pi.g2241_itr6_3483_pi.g2241.t1
OG0005335	CSbapl.50777	itr6_3064_pi.g1792_itr6_3064_pi.g1792.t1
OG0005336	CSbapl.50782	itr6_237_pil.g2994_itr6_237_pil.g2994.t1
OG0005337	CSbapl.50797	itr6_3118_pi.g2268_itr6_3118_pi.g2268.t1
OG0005338	CSbapl.50821	itr6_1170_pi.g2622_itr6_1170_pi.g2622.t1
OG0005339	CSbapl.50826	itr6_2624_pi.g526_itr6_2624_pi.g526.t1
OG0005340	CSbapl.50833	itr6_3811_pi.g2141_itr6_3811_pi.g2141.t1.1.57f6923f
OG0005341	CSbapl.5086	itr6_4315_pi.g843_itr6_4315_pi.g844_itr6_4315_pi.g843.t1_itr6_4315_pi.g844.t1
OG0005342	CSbapl.5088	itr6_4315_pi.g845_itr6_4315_pi.g845.t1
OG0005348	CSbapl.50944	itr6_4293_pi.g716_itr6_4293_pi.g716.t1
OG0005353	CSbapl.51150	itr6_840_pil.g2862_itr6_840_pil.g2862.t1
OG0005356	CSbapl.51180	itr6_5213_pi.g227_itr6_5213_pi.g227.t1
OG0005358	CSbapl.51217	itr6_3257_pi.g371_itr6_3257_pi.g371.t1
OG0005360	CSbapl.5126	itr6_3904_pi.g389_itr6_3904_pi.g389.t1
OG0005361	CSbapl.51276	itr6_1618_pi.g167_itr6_1618_pi.g167.t1
OG0005363	CSbapl.51293	itr6_12393_p.g137_itr6_12393_p.g137.t1
OG0005364	CSbapl.51306	itr6_3848_pi.g2482_itr6_3848_pi.g2483_itr6_3848_pi.g2482.t1_itr6_3848_pi.g2483.t1
OG0005366	CSbapl.51315	itr6_2256_pi.g101_itr6_2256_pi.g101.t1
OG0005367	CSbapl.51319	itr6_2029_pi.g1329_itr6_2029_pi.g1329.t1
OG0005368	CSbapl.51323	itr6_2029_pi.g1328_itr6_2029_pi.g1328.t1
OG0005369	CSbapl.51365	itr6_3101_pi.g2099_itr6_3101_pi.g2099.t1
OG0005372	CSbapl.5141	itr6_4061_pi.g1203_itr6_4061_pi.g1203.t1
OG0005373	CSbapl.51425	itr6_3030_pi.g1407_itr6_3030_pi.g1407.t1
OG0005374	CSbapl.51483	itr6_2417_pi.g1786_itr6_2417_pi.g1786.t1
OG0005375	CSbapl.51491	itr6_3378_pi.g1398_itr6_3378_pi.g1398.t1
OG0005377	CSbapl.51500	itr6_5521_pi.g220_itr6_5521_pi.g220.t1
OG0005379	CSbapl.51517	itr6_10915_p.g1_itr6_10915_p.g1.t1
OG0005380	CSbapl.51534	itr6_6113_pi.g39_itr6_6113_pi.g39.t1
OG0005381	CSbapl.51535	itr6_6330_pi.g568_itr6_6330_pi.g568.t1
OG0005387	CSbapl.51628	itr6_2873_pi.g3103_itr6_2873_pi.g3103.t1
OG0005393	CSbapl.51803	itr6_4788_pi.g1552_itr6_4788_pi.g1552.t1
OG0005394	CSbapl.51808	itr6_2367_pi.g1373_itr6_2367_pi.g1373.t1
OG0005395	CSbapl.51815	itr6_1033_pi.g948_itr6_1033_pi.g948.t1
OG0005397	CSbapl.5185	itr6_2509_pi.g2870_itr6_2509_pi.g2870.t1
OG0005399	CSbapl.51895	itr6_490_pil.g2376_itr6_490_pil.g2376.t1
OG0005401	CSbapl.51949	itr6_722_pil.g1198_itr6_722_pil.g1199_itr6_722_pil.g1198.t1_itr6_722_pil.g1199.t1
OG0005402	CSbapl.51966	itr6_3618_pi.g654_itr6_3618_pi.g654.t1
OG0005411	CSbapl.5209	itr6_188_pil.g2350_itr6_188_pil.g2350.t1
OG0005413	CSbapl.52128	itr6_3795_pi.g2039_itr6_3795_pi.g2039.t1
OG0005414	CSbapl.52143	itr6_2334_pi.g993_itr6_2334_pi.g993.t1
OG0005417	CSbapl.52172	itr6_706_pil.g1005_itr6_706_pil.g1005.t1
OG0005421	CSbapl.52204	itr6_2167_pi.g3091_itr6_2167_pi.g3091.t1
OG0005423	CSbapl.52268	itr6_2000_pi.g1003_itr6_2000_pi.g1003.t1
OG0005426	CSbapl.52322	itr6_2977_pi.g812_itr6_2977_pi.g812.t1
OG0005432	CSbapl.52528	itr6_2531_pi.g3128_itr6_2531_pi.g3128.t1
OG0005436	CSbapl.52547	itr6_328_pil.g66_itr6_328_pil.g66.t1
OG0005437	CSbapl.52579	itr6_2391_pi.g1554_itr6_2391_pi.g1554.t1
OG0005438	CSbapl.52580	itr6_4543_pi.g217_itr6_4543_pi.g217.t1
OG0005439	CSbapl.52587	itr6_2758_pi.g2043_itr6_2758_pi.g2043.t1
OG0005440	CSbapl.52594	itr6_4295_pi.g731_itr6_4295_pi.g731.t1
OG0005443	CSbapl.52624	itr6_3860_pi.g60_itr6_3860_pi.g60.t1
OG0005446	CSbapl.52693	itr6_11374_p.g102_itr6_11374_p.g102.t1
OG0005448	CSbapl.52717	itr6_468_pil.g1984_itr6_468_pil.g1984.t1
OG0005451	CSbapl.528	itr6_5443_pi.g1021_itr6_5443_pi.g1021.t1
OG0005452	CSbapl.52820	itr6_406_pil.g1158_itr6_406_pil.g1158.t1
OG0005458	CSbapl.52875	itr6_802_pil.g2321_itr6_802_pil.g2321.t1
OG0005460	CSbapl.5296	itr6_5503_pi.g155_itr6_5503_pi.g155.t1
OG0005462	CSbapl.52986	itr6_4690_pi.g977_itr6_4690_pi.g977.t1
OG0005464	CSbapl.53009	itr6_1124_pi.g2125_itr6_1124_pi.g2125.t1
OG0005465	CSbapl.53018	itr6_4801_pi.g1611_itr6_4801_pi.g1611.t1
OG0005469	CSbapl.531	itr6_4402_pi.g1360_itr6_4402_pi.g1360.t1
OG0005470	CSbapl.53105	itr6_3002_pi.g1094_itr6_3002_pi.g1094.t1
OG0005472	CSbapl.53128	itr6_976_pil.g181_itr6_976_pil.g181.t1
OG0005476	CSbapl.53237	itr6_2705_pi.g1483_itr6_2705_pi.g1483.t1
OG0005477	CSbapl.53247	itr6_3888_pi.g300_itr6_3888_pi.g300.t1
OG0005479	CSbapl.53344	itr6_2498_pi.g2712_itr6_2498_pi.g2712.t1
OG0005480	CSbapl.53356	itr6_2705_pi.g1484_itr6_2705_pi.g1484.t1
OG0005481	CSbapl.5336	itr6_1294_pi.g79_itr6_1294_pi.g79.t1
OG0005482	CSbapl.53385	itr6_5289_pi.g469_itr6_5289_pi.g469.t1
OG0005484	CSbapl.5343	itr6_2724_pi.g1601_itr6_2724_pi.g1601.t1
OG0005500	CSbapl.53549	itr6_2424_pi.g1866_itr6_2424_pi.g1866.t1
OG0005501	CSbapl.53551	itr6_2424_pi.g1864_itr6_2424_pi.g1864.t1
OG0005508	CSbapl.53661	itr6_2455_pi.g2143_itr6_2455_pi.g2143.t1
OG0005510	CSbapl.53707	itr6_8405_pi.g59_itr6_8405_pi.g59.t1
OG0005511	CSbapl.53717	itr6_6430_pi.g13_itr6_6430_pi.g13.t1
OG0005513	CSbapl.5375	itr6_9806_pi.g136_itr6_9806_pi.g136.t1
OG0005515	CSbapl.53941	itr6_12504_p.g197_itr6_12504_p.g197.t1
OG0005516	CSbapl.53972	itr6_2424_pi.g1862_itr6_2424_pi.g1862.t1
OG0005520	CSbapl.54073	itr6_3389_pi.g1473_itr6_3389_pi.g1473.t1
OG0005521	CSbapl.541	itr6_3008_pi.g1165_itr6_3008_pi.g1165.t1
OG0005522	CSbapl.54115	itr6_975_pil.g166_itr6_975_pil.g166.t1
OG0005523	CSbapl.54144	itr6_1808_pi.g2468_itr6_1808_pi.g2468.t1
OG0005524	CSbapl.5416	itr6_2954_pi.g655_itr6_2954_pi.g655.t1
OG0005525	CSbapl.54192	itr6_2819_pi.g2635_itr6_2819_pi.g2635.t1
OG0005526	CSbapl.54202	itr6_6801_pi.g32_itr6_6801_pi.g32.t1
OG0005527	CSbapl.54224	itr6_4126_pi.g1576_itr6_4126_pi.g1576.t1
OG0005528	CSbapl.54260	itr6_1035_pi.g956_itr6_1035_pi.g956.t1
OG0005529	CSbapl.543	itr6_4402_pi.g1364_itr6_4402_pi.g1364.t1
OG0005530	CSbapl.5432	itr6_2052_pi.g1690_itr6_2052_pi.g1690.t1
OG0005531	CSbapl.5439	itr6_1006_pi.g548_itr6_1006_pi.g548.t1
OG0005532	CSbapl.544	itr6_4402_pi.g1365_itr6_4402_pi.g1365.t1
OG0005533	CSbapl.54422	itr6_427_pil.g1405_itr6_427_pil.g1405.t1
OG0005534	CSbapl.5448	itr6_4554_pi.g289_itr6_4554_pi.g289.t1
OG0005535	CSbapl.54499	itr6_3403_pi.g1595_itr6_3403_pi.g1595.t1
OG0005537	CSbapl.54572	itr6_1167_pi.g2582_itr6_1167_pi.g2582.t1
OG0005538	CSbapl.54583	itr6_544_pil.g3138_itr6_544_pil.g3138.t1
OG0005539	CSbapl.546	itr6_4048_pi.g1166_itr6_4048_pi.g1166.t1
OG0005540	CSbapl.5461	itr6_781_pil.g1947_itr6_781_pil.g1947.t1
OG0005541	CSbapl.54611	itr6_3908_pi.g402_itr6_3908_pi.g402.t1
OG0005544	CSbapl.54643	itr6_3230_pi.g174_itr6_3230_pi.g174.t1
OG0005545	CSbapl.54644	itr6_3230_pi.g175_itr6_3230_pi.g175.t1
OG0005546	CSbapl.54650	itr6_4570_pi.g352_itr6_4570_pi.g352.t1
OG0005547	CSbapl.54680	itr6_649_pil.g50_itr6_649_pil.g50.t1
OG0005552	CSbapl.54762	itr6_4498_pi.g23_itr6_4498_pi.g23.t1
OG0005555	CSbapl.54800	itr6_5879_pi.g276_itr6_5879_pi.g276.t1
OG0005557	CSbapl.54815	itr6_2309_pi.g720_itr6_2309_pi.g720.t1
OG0005561	CSbapl.54879	itr6_1760_pi.g1833_itr6_1760_pi.g1833.t1
OG0005562	CSbapl.5490	itr6_2458_pi.g2229_itr6_2458_pi.g2229.t1
OG0005563	CSbapl.54908	itr6_3052_pi.g1636_itr6_3052_pi.g1636.t1
OG0005565	CSbapl.55005	itr6_14379_p.g144_itr6_14379_p.g144.t1
OG0005566	CSbapl.5503	itr6_2327_pi.g925_itr6_2327_pi.g925.t1
OG0005567	CSbapl.55121	itr6_2462_pi.g2310_itr6_2462_pi.g2310.t1
OG0005568	CSbapl.55162	itr6_1951_pi.g395_itr6_1951_pi.g395.t1
OG0005569	CSbapl.55187	itr6_3479_pi.g2202_itr6_3479_pi.g2202.t1
OG0005570	CSbapl.55256	itr6_1653_pi.g521_itr6_1653_pi.g521.t1
OG0005571	CSbapl.5527	itr6_749_pil.g1564_itr6_749_pil.g1564.t1
OG0005573	CSbapl.55342	itr6_1725_pi.g1347_itr6_1725_pi.g1347.t1
OG0005574	CSbapl.55373	itr6_6059_pi.g804_itr6_6059_pi.g804.t1
OG0005577	CSbapl.55450	itr6_335_pil.g178_itr6_335_pil.g178.t1
OG0005578	CSbapl.55466	itr6_2448_pi.g2062_itr6_2448_pi.g2062.t1
OG0005584	CSbapl.55693	itr6_4285_pi.g675_itr6_4285_pi.g675.t1
OG0005585	CSbapl.55702	itr6_5629_pi.g539_itr6_5629_pi.g539.t1
OG0005588	CSbapl.55710	itr6_3325_pi.g939_itr6_3325_pi.g939.t1
OG0005589	CSbapl.55753	itr6_2876_pi.g3131_itr6_2876_pi.g3131.t1
OG0005593	CSbapl.55797	itr6_14554_p.g67_itr6_14554_p.g67.t1
OG0005594	CSbapl.55805	itr6_3160_pi.g2589_itr6_3160_pi.g2589.t1
OG0005595	CSbapl.55816	itr6_4714_pi.g1144_itr6_4714_pi.g1144.t1
OG0005601	CSbapl.55901	itr6_1457_pi.g2291_itr6_1457_pi.g2291.t1
OG0005602	CSbapl.55926	itr6_2908_pi.g170_itr6_2908_pi.g170.t1
OG0005608	CSbapl.56041	itr6_1693_pi.g991_itr6_1693_pi.g991.t1
OG0005609	CSbapl.56044	itr6_1335_pi.g632_itr6_1335_pi.g632.t1
OG0005610	CSbapl.56066	itr6_91_pilo.g1236_itr6_91_pilo.g1236.t1
OG0005612	CSbapl.56219	itr6_786_pil.g1989_itr6_786_pil.g1989.t1
OG0005613	CSbapl.56236	itr6_786_pil.g1993_itr6_786_pil.g1993.t1
OG0005614	CSbapl.56268	itr6_1761_pi.g1839_itr6_1761_pi.g1839.t1
OG0005615	CSbapl.56313	itr6_1846_pi.g2932_itr6_1846_pi.g2932.t1
OG0005617	CSbapl.56353	itr6_9416_pi.g80_itr6_9416_pi.g80.t1
OG0005618	CSbapl.56382	itr6_12685_p.g110_itr6_12685_p.g110.t1
OG0005619	CSbapl.564	itr6_2475_pi.g2502_itr6_2475_pi.g2502.t1
OG0005620	CSbapl.56440	itr6_10153_p.g169_itr6_10153_p.g169.t1
OG0005621	CSbapl.565	itr6_2475_pi.g2503_itr6_2475_pi.g2503.t1
OG0005622	CSbapl.56502	itr6_1016_pi.g673_itr6_1016_pi.g673.t1
OG0005623	CSbapl.56547	itr6_3333_pi.g1011_itr6_3333_pi.g1011.t1
OG0005624	CSbapl.56548	itr6_122_pil.g1611_itr6_122_pil.g1611.t1
OG0005625	CSbapl.56554	itr6_2977_pi.g825_itr6_2977_pi.g825.t1
OG0005626	CSbapl.56610	itr6_1455_pi.g2217_itr6_1455_pi.g2217.t1
OG0005628	CSbapl.5663	itr6_10146_p.g164_itr6_10146_p.g164.t1
OG0005629	CSbapl.56636	itr6_6428_pi.g10_itr6_6428_pi.g10.t1
OG0005632	CSbapl.56773	itr6_335_pil.g194_itr6_335_pil.g194.t1
OG0005633	CSbapl.56782	itr6_6322_pi.g548_itr6_6322_pi.g548.t1
OG0005634	CSbapl.56892	itr6_705_pil.g992_itr6_705_pil.g992.t1
OG0005635	CSbapl.56896	itr6_2991_pi.g969_itr6_2991_pi.g969.t1
OG0005636	CSbapl.56905	itr6_15872_p.g99_itr6_15872_p.g99.t1
OG0005637	CSbapl.56912	itr6_3662_pi.g1040_itr6_3662_pi.g1040.t1
OG0005641	CSbapl.56962	itr6_37_pilo.g533_itr6_37_pilo.g533.t1
OG0005644	CSbapl.57044	itr6_2866_pi.g3027_itr6_2866_pi.g3027.t1
OG0005646	CSbapl.57061	itr6_5568_pi.g348_itr6_5568_pi.g348.t1
OG0005650	CSbapl.57121	itr6_4355_pi.g1055_itr6_4355_pi.g1055.t1
OG0005651	CSbapl.57144	itr6_418_pil.g1312_itr6_418_pil.g1312.t1
OG0005654	CSbapl.57183	itr6_744_pil.g1435_itr6_744_pil.g1435.t1
OG0005660	CSbapl.57218	itr6_2658_pi.g993_itr6_2658_pi.g993.t1
OG0005661	CSbapl.57221	itr6_3436_pi.g1821_itr6_3436_pi.g1821.t1
OG0005664	CSbapl.5730	itr6_18_pilo.g328_itr6_18_pilo.g328.t1
OG0005665	CSbapl.57307	itr6_2622_pi.g499_itr6_2622_pi.g499.t1
OG0005671	CSbapl.57418	itr6_2097_pi.g2306_itr6_2097_pi.g2306.t1
OG0005674	CSbapl.57462	itr6_3064_pi.g1747_itr6_3064_pi.g1747.t1
OG0005676	CSbapl.5751	itr6_752_pil.g1617_itr6_752_pil.g1617.t1
OG0005682	CSbapl.57589	itr6_848_pil.g3013_itr6_848_pil.g3013.t1
OG0005686	CSbapl.57627	itr6_518_pil.g2739_itr6_518_pil.g2739.t1
OG0005691	CSbapl.57695	itr6_10189_p.g212_itr6_10189_p.g212.t1
OG0005696	CSbapl.5775	itr6_76_pilo.g974_itr6_76_pilo.g974.t1
OG0005697	CSbapl.57755	itr6_3744_pi.g1635_itr6_3744_pi.g1635.t1
OG0005698	CSbapl.57773	itr6_3134_pi.g2371_itr6_3134_pi.g2371.t1
OG0005699	CSbapl.57790	itr6_5356_pi.g728_itr6_5356_pi.g728.t1
OG0005700	CSbapl.57809	itr6_3054_pi.g1646_itr6_3054_pi.g1646.t1
OG0005704	CSbapl.57968	itr6_2658_pi.g985_itr6_2658_pi.g985.t1
OG0005706	CSbapl.57992	itr6_2703_pi.g1458_itr6_2703_pi.g1458.t1
OG0005707	CSbapl.58008	itr6_3187_pi.g2787_itr6_3187_pi.g2787.t1
OG0005709	CSbapl.58057	itr6_4317_pi.g875_itr6_4317_pi.g875.t1
OG0005711	CSbapl.58073	itr6_1372_pi.g1151_itr6_1372_pi.g1151.t1
OG0005715	CSbapl.58097	itr6_16318_p.g146_itr6_16318_p.g146.t1
OG0005717	CSbapl.58116	itr6_3944_pi.g650_itr6_3944_pi.g650.t1
OG0005718	CSbapl.58201	itr6_6066_pi.g828_itr6_6066_pi.g828.t1
OG0005719	CSbapl.58216	itr6_4552_pi.g283_itr6_4552_pi.g284_itr6_4552_pi.g283.t1_itr6_4552_pi.g284.t1
OG0005727	CSbapl.58314	itr6_4098_pi.g1387_itr6_4098_pi.g1387.t1
OG0005730	CSbapl.58374	itr6_1097_pi.g1786_itr6_1097_pi.g1786.t1
OG0005731	CSbapl.58432	itr6_2612_pi.g395_itr6_2612_pi.g395.t1
OG0005737	CSbapl.58596	itr6_2738_pi.g1837_itr6_2738_pi.g1837.t1
OG0005738	CSbapl.58597	itr6_2738_pi.g1836_itr6_2738_pi.g1836.t1
OG0005740	CSbapl.58607	itr6_2281_pi.g403_itr6_2281_pi.g403.t1
OG0005741	CSbapl.58645	itr6_1725_pi.g1353_itr6_1725_pi.g1353.t1
OG0005742	CSbapl.58652	itr6_3443_pi.g1906_itr6_3443_pi.g1906.t1
OG0005748	CSbapl.58752	itr6_1814_pi.g2526_itr6_1814_pi.g2526.t1
OG0005755	CSbapl.58850	itr6_9778_pi.g106_itr6_9778_pi.g106.t1
OG0005759	CSbapl.58976	itr6_5465_pi.g39_itr6_5465_pi.g39.t1
OG0005761	CSbapl.59016	itr6_5846_pi.g206_itr6_5846_pi.g206.t1
OG0005762	CSbapl.59019	itr6_1755_pi.g1763_itr6_1755_pi.g1763.t1
OG0005764	CSbapl.59067	itr6_729_pil.g1284_itr6_729_pil.g1284.t1
OG0005765	CSbapl.59122	itr6_385_pil.g877_itr6_385_pil.g877.t1
OG0005767	CSbapl.59189	itr6_22_pilo.g391_itr6_22_pilo.g391.t1
OG0005768	CSbapl.59193	itr6_4081_pi.g1288_itr6_4081_pi.g1288.t1
OG0005770	CSbapl.59218	itr6_4704_pi.g1072_itr6_4704_pi.g1072.t1
OG0005773	CSbapl.59255	itr6_1364_pi.g1031_itr6_1364_pi.g1031.t1.2.57f6923c
OG0005776	CSbapl.59305	itr6_215_pil.g2689_itr6_215_pil.g2689.t1
OG0005777	CSbapl.59315	itr6_2787_pi.g2289_itr6_2787_pi.g2289.t1
OG0005781	CSbapl.59382	itr6_1658_pi.g599_itr6_1658_pi.g599.t1
OG0005785	CSbapl.5945	itr6_519_pil.g2748_itr6_519_pil.g2748.t1
OG0005786	CSbapl.59487	itr6_802_pil.g2358_itr6_802_pil.g2358.t1
OG0005789	CSbapl.59509	itr6_4205_pi.g181_itr6_4205_pi.g181.t1
OG0005790	CSbapl.59511	itr6_1103_pi.g1847_itr6_1103_pi.g1847.t1
OG0005791	CSbapl.59539	itr6_4530_pi.g159_itr6_4530_pi.g159.t1
OG0005793	CSbapl.59588	itr6_6091_pi.g916_itr6_6091_pi.g916.t1
OG0005797	CSbapl.59721	itr6_2644_pi.g845_itr6_2644_pi.g845.t1
OG0005799	CSbapl.59754	itr6_2691_pi.g1329_itr6_2691_pi.g1329.t1
OG0005800	CSbapl.59825	itr6_3519_pi.g2561_itr6_3519_pi.g2561.t1
OG0005801	CSbapl.59829	itr6_2458_pi.g2251_itr6_2458_pi.g2251.t1
OG0005802	CSbapl.59870	itr6_11843_p.g200_itr6_11843_p.g200.t1
OG0005803	CSbapl.59876	itr6_17196_p.g113_itr6_17196_p.g113.t1
OG0005806	CSbapl.59915	itr6_14366_p.g139_itr6_14366_p.g139.t1
OG0005811	CSbapl.60076	itr6_406_pil.g1160_itr6_406_pil.g1160.t1
OG0005812	CSbapl.60084	itr6_116_pil.g1546_itr6_116_pil.g1546.t1.3.57f6923b
OG0005814	CSbapl.60091	itr6_4383_pi.g1264_itr6_4383_pi.g1264.t1
OG0005815	CSbapl.60126	itr6_1326_pi.g488_itr6_1326_pi.g488.t1
OG0005819	CSbapl.60171	itr6_2715_pi.g1559_itr6_2715_pi.g1559.t1
OG0005821	CSbapl.6027	itr6_5414_pi.g913_itr6_5414_pi.g913.t1
OG0005822	CSbapl.6028	itr6_3638_pi.g813_itr6_3638_pi.g813.t1
OG0005823	CSbapl.6029	itr6_3638_pi.g814_itr6_3638_pi.g814.t1
OG0005824	CSbapl.6030	itr6_3638_pi.g816_itr6_3638_pi.g816.t1
OG0005825	CSbapl.60310	itr6_6025_pi.g691_itr6_6025_pi.g691.t1
OG0005826	CSbapl.60328	itr6_2796_pi.g2403_itr6_2796_pi.g2403.t1
OG0005827	CSbapl.60360	itr6_3324_pi.g929_itr6_3324_pi.g929.t1
OG0005829	CSbapl.60441	itr6_3348_pi.g1152_itr6_3348_pi.g1152.t1
OG0005835	CSbapl.6056	itr6_1502_pi.g2768_itr6_1502_pi.g2768.t1
OG0005837	CSbapl.60594	itr6_222_pil.g2781_itr6_222_pil.g2781.t1
OG0005840	CSbapl.6065	itr6_92_pilo.g1254_itr6_92_pilo.g1254.t1
OG0005841	CSbapl.6067	itr6_519_pil.g2765_itr6_519_pil.g2765.t1
OG0005842	CSbapl.60674	itr6_2020_pi.g1237_itr6_2020_pi.g1237.t1
OG0005843	CSbapl.60676	itr6_1744_pi.g1626_itr6_1744_pi.g1626.t1
OG0005846	CSbapl.6079	itr6_1741_pi.g1580_itr6_1741_pi.g1580.t1
OG0005848	CSbapl.60810	itr6_520_pil.g2799_itr6_520_pil.g2799.t1
OG0005849	CSbapl.60858	itr6_438_pil.g1572_itr6_438_pil.g1572.t1
OG0005853	CSbapl.60928	itr6_3718_pi.g1457_itr6_3718_pi.g1457.t1.10.57f6923f
OG0005854	CSbapl.6097	itr6_1057_pi.g1267_itr6_1057_pi.g1267.t1
OG0005855	CSbapl.60976	itr6_3875_pi.g189_itr6_3875_pi.g189.t1
OG0005856	CSbapl.61002	itr6_1_pilon.g21_itr6_1_pilon.g21.t1
OG0005857	CSbapl.61007	itr6_1_pilon.g20_itr6_1_pilon.g20.t1
OG0005858	CSbapl.61029	itr6_3207_pi.g2926_itr6_3207_pi.g2926.t1
OG0005859	CSbapl.6103	itr6_665_pil.g315_itr6_665_pil.g315.t1
OG0005860	CSbapl.61030	itr6_385_pil.g881_itr6_385_pil.g881.t1
OG0005861	CSbapl.61049	itr6_4147_pi.g1677_itr6_4147_pi.g1677.t1
OG0005862	CSbapl.6106	itr6_1507_pi.g2837_itr6_1507_pi.g2837.t1
OG0005865	CSbapl.61098	itr6_4525_pi.g137_itr6_4525_pi.g137.t1
OG0005866	CSbapl.61106	itr6_4525_pi.g138_itr6_4525_pi.g138.t1
OG0005867	CSbapl.61116	itr6_830_pil.g2731_itr6_830_pil.g2731.t1
OG0005868	CSbapl.61126	itr6_3233_pi.g208_itr6_3233_pi.g208.t1
OG0005869	CSbapl.61142	itr6_1935_pi.g122_itr6_1935_pi.g122.t1
OG0005870	CSbapl.61242	itr6_9_pilon.g155_itr6_9_pilon.g155.t1
OG0005873	CSbapl.61329	itr6_480_pil.g2161_itr6_480_pil.g2161.t1
OG0005874	CSbapl.6134	itr6_665_pil.g313_itr6_665_pil.g313.t1
OG0005875	CSbapl.61343	itr6_489_pil.g2327_itr6_489_pil.g2327.t1
OG0005877	CSbapl.61366	itr6_3655_pi.g1009_itr6_3655_pi.g1009.t1
OG0005882	CSbapl.61449	itr6_2284_pi.g444_itr6_2284_pi.g444.t1
OG0005883	CSbapl.61453	itr6_4570_pi.g356_itr6_4570_pi.g356.t1
OG0005884	CSbapl.61466	itr6_3875_pi.g186_itr6_3875_pi.g186.t1
OG0005885	CSbapl.61485	itr6_3364_pi.g1251_itr6_3364_pi.g1251.t1
OG0005887	CSbapl.61578	itr6_2486_pi.g2652_itr6_2486_pi.g2652.t1
OG0005889	CSbapl.61707	itr6_5120_pi.g1419_itr6_5120_pi.g1419.t1
OG0005893	CSbapl.61779	itr6_1024_pi.g839_itr6_1024_pi.g839.t1
OG0005894	CSbapl.61851	itr6_5754_pi.g1008_itr6_5754_pi.g1008.t1
OG0005898	CSbapl.61910	itr6_15189_p.g88_itr6_15189_p.g88.t1
OG0005899	CSbapl.61952	itr6_2819_pi.g2650_itr6_2819_pi.g2650.t1
OG0005901	CSbapl.62001	itr6_5648_pi.g636_itr6_5648_pi.g636.t1
OG0005902	CSbapl.62012	itr6_2614_pi.g406_itr6_2614_pi.g406.t1
OG0005904	CSbapl.6209	itr6_4794_pi.g1570_itr6_4794_pi.g1570.t1
OG0005907	CSbapl.62204	itr6_2256_pi.g104_itr6_2256_pi.g104.t1
OG0005908	CSbapl.62291	itr6_1182_pi.g2751_itr6_1182_pi.g2752_itr6_1182_pi.g2751.t1_itr6_1182_pi.g2752.t1
OG0005909	CSbapl.62299	itr6_4711_pi.g1114_itr6_4711_pi.g1114.t1
OG0005910	CSbapl.62300	itr6_801_pil.g2304_itr6_801_pil.g2304.t1
OG0005911	CSbapl.62309	itr6_1090_pi.g1717_itr6_1090_pi.g1717.t1
OG0005913	CSbapl.62385	itr6_6020_pi.g682_itr6_6020_pi.g682.t1
OG0005921	CSbapl.62504	itr6_1347_pi.g785_itr6_1347_pi.g785.t1
OG0005931	CSbapl.62761	itr6_3947_pi.g663_itr6_3947_pi.g666_itr6_3947_pi.g663.t1_itr6_3947_pi.g666.t1.4.57f6f334
OG0005934	CSbapl.62835	itr6_1806_pi.g2460_itr6_1806_pi.g2460.t1
OG0005937	CSbapl.62893	itr6_2658_pi.g980_itr6_2658_pi.g980.t1
OG0005938	CSbapl.62909	itr6_3681_pi.g1202_itr6_3681_pi.g1202.t1
OG0005939	CSbapl.62928	itr6_10879_p.g222_itr6_10879_p.g222.t1
OG0005942	CSbapl.62949	itr6_681_pil.g511_itr6_681_pil.g511.t1
OG0005944	CSbapl.62990	itr6_2920_pi.g302_itr6_2920_pi.g302.t1
OG0005946	CSbapl.6307	itr6_2604_pi.g342_itr6_2604_pi.g342.t1
OG0005947	CSbapl.63085	itr6_759_pil.g1751_itr6_759_pil.g1751.t1
OG0005948	CSbapl.6309	itr6_2604_pi.g341_itr6_2604_pi.g341.t1
OG0005949	CSbapl.63139	itr6_3265_pi.g430_itr6_3265_pi.g430.t1
OG0005950	CSbapl.63184	itr6_215_pil.g2677_itr6_215_pil.g2677.t1
OG0005951	CSbapl.63185	itr6_215_pil.g2676_itr6_215_pil.g2676.t1
OG0005953	CSbapl.6319	itr6_3240_pi.g277_itr6_3240_pi.g277.t1
OG0005957	CSbapl.63213	itr6_10504_p.g185_itr6_10504_p.g185.t1
OG0005958	CSbapl.63237	itr6_1423_pi.g1750_itr6_1423_pi.g1750.t1
OG0005960	CSbapl.63267	itr6_4812_pi.g1632_itr6_4812_pi.g1632.t1
OG0005963	CSbapl.63331	itr6_3903_pi.g379_itr6_3903_pi.g379.t1
OG0005964	CSbapl.63371	itr6_2845_pi.g2856_itr6_2845_pi.g2856.t1
OG0005965	CSbapl.63403	itr6_3822_pi.g2256_itr6_3822_pi.g2256.t1
OG0005969	CSbapl.63478	itr6_2445_pi.g2033_itr6_2445_pi.g2033.t1
OG0005971	CSbapl.63514	itr6_696_pil.g779_itr6_696_pil.g779.t1
OG0005972	CSbapl.63528	itr6_2612_pi.g391_itr6_2612_pi.g391.t1
OG0005974	CSbapl.63580	itr6_5742_pi.g950_itr6_5742_pi.g950.t1
OG0005976	CSbapl.63662	itr6_5613_pi.g467_itr6_5613_pi.g467.t1
OG0005979	CSbapl.63680	itr6_3994_pi.g937_itr6_3994_pi.g937.t1
OG0005985	CSbapl.6380	itr6_2077_pi.g2101_itr6_2077_pi.g2101.t1
OG0005986	CSbapl.6382	itr6_504_pil.g2492_itr6_504_pil.g2492.t1
OG0005989	CSbapl.63839	itr6_3785_pi.g1977_itr6_3785_pi.g1977.t1
OG0005995	CSbapl.63985	itr6_1932_pi.g65_itr6_1932_pi.g65.t1
OG0005996	CSbapl.64013	itr6_5631_pi.g550_itr6_5631_pi.g550.t1
OG0005999	CSbapl.64030	itr6_2598_pi.g283_itr6_2598_pi.g283.t1
OG0006002	CSbapl.64048	itr6_4859_pi.g249_itr6_4859_pi.g249.t1
OG0006005	CSbapl.64093	itr6_778_pil.g1905_itr6_778_pil.g1905.t1
OG0006007	CSbapl.64167	itr6_2702_pi.g1444_itr6_2702_pi.g1444.t1
OG0006009	CSbapl.64200	itr6_3846_pi.g2451_itr6_3846_pi.g2451.t1
OG0006010	CSbapl.64214	itr6_1059_pi.g1293_itr6_1059_pi.g1293.t1
OG0006013	CSbapl.64333	itr6_195_pil.g2431_itr6_195_pil.g2431.t1
OG0006021	CSbapl.64415	itr6_1086_pi.g1615_itr6_1086_pi.g1615.t1
OG0006022	CSbapl.64418	itr6_1086_pi.g1614_itr6_1086_pi.g1614.t1
OG0006023	CSbapl.64455	itr6_427_pil.g1414_itr6_427_pil.g1414.t1
OG0006024	CSbapl.64458	itr6_1023_pi.g825_itr6_1023_pi.g825.t1
OG0006029	CSbapl.64587	itr6_447_pil.g1705_itr6_447_pil.g1705.t1
OG0006030	CSbapl.64605	itr6_5769_pi.g1071_itr6_5769_pi.g1071.t1
OG0006031	CSbapl.64625	itr6_1381_pi.g1243_itr6_1381_pi.g1243.t1
OG0006032	CSbapl.64630	itr6_3006_pi.g1155_itr6_3006_pi.g1155.t1
OG0006033	CSbapl.64631	itr6_3006_pi.g1154_itr6_3006_pi.g1154.t1
OG0006034	CSbapl.64633	itr6_1982_pi.g756_itr6_1982_pi.g756.t1
OG0006036	CSbapl.647	itr6_4372_pi.g1177_itr6_4372_pi.g1177.t1
OG0006040	CSbapl.64764	itr6_2875_pi.g3120_itr6_2875_pi.g3120.t1
OG0006043	CSbapl.64796	itr6_2489_pi.g2667_itr6_2489_pi.g2667.t1
OG0006044	CSbapl.64807	itr6_4286_pi.g680_itr6_4286_pi.g680.t1
OG0006047	CSbapl.64859	itr6_107_pil.g1474_itr6_107_pil.g1474.t1
OG0006052	CSbapl.64903	itr6_2297_pi.g584_itr6_2297_pi.g584.t1
OG0006054	CSbapl.64995	itr6_7577_pi.g120_itr6_7577_pi.g120.t1
OG0006056	CSbapl.65028	itr6_3850_pi.g2495_itr6_3850_pi.g2495.t1
OG0006059	CSbapl.65048	itr6_4526_pi.g143_itr6_4526_pi.g143.t1
OG0006066	CSbapl.65168	itr6_334_pil.g142_itr6_334_pil.g142.t1
OG0006074	CSbapl.65338	itr6_1003_pi.g486_itr6_1003_pi.g486.t1
OG0006077	CSbapl.65427	itr6_3064_pi.g1755_itr6_3064_pi.g1755.t1
OG0006078	CSbapl.65435	itr6_6269_pi.g422_itr6_6269_pi.g422.t1
OG0006079	CSbapl.6545	itr6_3695_pi.g1289_itr6_3695_pi.g1289.t1
OG0006083	CSbapl.65467	itr6_3630_pi.g742_itr6_3630_pi.g742.t1
OG0006085	CSbapl.65505	itr6_8333_pi.g221_itr6_8333_pi.g221.t1
OG0006086	CSbapl.65507	itr6_1950_pi.g371_itr6_1950_pi.g371.t1
OG0006087	CSbapl.65516	itr6_4307_pi.g812_itr6_4307_pi.g812.t1
OG0006088	CSbapl.65539	itr6_1426_pi.g1786_itr6_1426_pi.g1786.t1
OG0006089	CSbapl.65614	itr6_3792_pi.g2010_itr6_3792_pi.g2010.t1
OG0006092	CSbapl.65683	itr6_2336_pi.g1043_itr6_2336_pi.g1043.t1
OG0006101	CSbapl.65816	itr6_202_pil.g2514_itr6_202_pil.g2514.t1
OG0006111	CSbapl.65985	itr6_7465_pi.g69_itr6_7465_pi.g69.t1
OG0006112	CSbapl.66004	itr6_4722_pi.g1208_itr6_4722_pi.g1208.t1
OG0006114	CSbapl.66071	itr6_4510_pi.g89_itr6_4510_pi.g89.t1
OG0006115	CSbapl.66079	itr6_1618_pi.g141_itr6_1618_pi.g141.t1
OG0006117	CSbapl.6613	itr6_86_pilo.g1115_itr6_86_pilo.g1115.t1
OG0006118	CSbapl.66140	itr6_1502_pi.g2763_itr6_1502_pi.g2763.t1
OG0006126	CSbapl.663	itr6_470_pil.g2005_itr6_470_pil.g2005.t1
OG0006132	CSbapl.66353	itr6_488_pil.g2298_itr6_488_pil.g2298.t1
OG0006133	CSbapl.66375	itr6_2735_pi.g1800_itr6_2735_pi.g1800.t1
OG0006134	CSbapl.66396	itr6_2789_pi.g2300_itr6_2789_pi.g2300.t1
OG0006141	CSbapl.66546	itr6_5588_pi.g393_itr6_5588_pi.g393.t1
OG0006142	CSbapl.66552	itr6_2007_pi.g1127_itr6_2007_pi.g1127.t1
OG0006143	CSbapl.66554	itr6_3845_pi.g2437_itr6_3845_pi.g2437.t1
OG0006145	CSbapl.66604	itr6_4362_pi.g1087_itr6_4362_pi.g1087.t1
OG0006156	CSbapl.66860	itr6_4593_pi.g453_itr6_4593_pi.g453.t1
OG0006157	CSbapl.66891	itr6_10302_p.g22_itr6_10302_p.g22.t1
[truncated: 544 more rows]

## Sheet: shared sex-related genes
	Gigantidas platifrons sex-related genes expression level in FPKM										Limnoperna fortunei sex-related genes expression level in FPKM
Gene	GIPL_F1	GIPL_F2	GIPL_F3	GIPL_M1	GIPL_M2	GIPL_M3	GIPL_F_M_FPKM	GIPL_M_F_FPKM	GIPL_F_M_log2FPKM	Gene	LIFO_F10	LIFO_F15	LIFO_F17	LIFO_M2	LIFO_M18	LIFO_M27	LIFO_M29	LIFO_F_M_FPKM	LIFO_M_F_FPKM	LIFO_F_M_log2FPKM
FoxL2	232.47	392.32	243.88	4.37307	2.98672	1.512	97.9137	0.0102131	6.61344	FoxL2	63.8089	59.821	38.8434	0.265724	0.0546591	0.0677845	0.0621205	881.748	0.00113411	9.78422
SOX2	207.293	112.595	130.966	17.2506	24.345	4.73366	9.73154	0.102759	3.28267	SOX2	17.1615	16.2186	18.7616	11.0966	1.0865	3.27226	2.07272	9.8326	0.101703	3.29757
RUNX1	254.407	52.1337	58.595	34.646	34.5078	23.9241	3.92291	0.254913	1.97192	RUNX1	8.23599	14.5781	8.83063	10.0125	4.03991	9.89047	16.3073	1.37766	0.725869	0.462219
β-catenin	225.24	89.5322	124.274	85.2801	75.68	36.1993	2.22686	0.449063	1.15501	β-catenin	72.6577	61.61	80.5082	30.3225	26.2904	37.8438	51.2097	2.12493	0.470603	1.08742
DACH2	73.8317	101.049	87.5461	32.5356	23.0518	22.3583	3.3668	0.297018	1.75138	DACH2	12.292	11.3681	8.32327	3.7922	8.16309	4.3394	3.86961	2.18516	0.457633	1.12774
SOX4	98.0208	46.6875	101.983	37.8192	44.1226	46.9101	1.91454	0.52232	0.936995	SOX4	21.6252	21.9326	35.1403	26.2281	10.9173	16.2818	24.7087	2.0214	0.494708	1.01535
SOX9	44.1178	13.0324	39.2878	8.46868	6.85336	4.47343	4.87173	0.205266	2.28443	SOX9	3.38461	3.11124	0.883874	2.68239	1.44763	2.1942	1.56828	1.93126	0.517795	0.949546
SOX5	45.3128	15.0121	28.2836	5.67015	11.4417	3.96053	4.20495	0.237815	2.07209	SOX5	3.96396	4.94932	2.61483	3.48038	2.18199	5.96173	10.4628	0.806624	1.23973	-0.310031
HES1	16.7041	24.425	16.8699	1.83984	1.45852	3.02917	9.16613	0.109097	3.19631	HES1	4.9538	5.52978	7.34657	2.7909	1.62085	1.72596	4.60853	2.5921	0.385787	1.37412
DLX2	20.6577	10.5231	16.1797	2.85758	4.34512	2.68618	4.78927	0.2088	2.25981	DLX2	0.366517	0.671463	0.35549	1.38284	0.571368	0.743626	0.141779	1.90579	0.524716	0.930392
ROBO1	15.2204	5.69892	13.4265	5.31723	3.22683	2.06732	3.23669	0.308958	1.69452	ROBO1	3.97344	3.43872	3.02923	3.4466	2.45121	2.55206	15.6772	0.671551	1.48909	-0.574431
TBX20	22.3057	1.58276	0.731082	0.224493	0.290133	0.448372	25.5656	0.0391151	4.67613	TBX20	0.299492	0.64217	0.242048	0.57807	0.209295	0.583948	0.320659	1.58163	0.632259	0.661411
HSD17B6	6.13895	4.54129	19.8757	3.18865	2.25287	2.9146	3.65671	0.27347	1.87055	HSD17B6	3.45493	3.31557	1.63806	2.36128	1.38188	2.8932	1.80803	1.77045	0.564828	0.824117
HPGDS	12.6155	11.2519	14.4029	1.86326	13.5976	1.61069	2.24176	0.446078	1.16463	HPGDS	17.5022	1.71826	1.00908	0.806642	1.13804	1.0518	0.767296	7.11371	0.140574	2.8306
WNT7	13.5113	1.85745	5.84804	1.59448	1.63349	0.367528	5.90095	0.169464	2.56095	WNT7	0.30388	0.171403	0.0529312	0.187357	0.0687923	0.0690616	0.0893518	3.14944	0.317517	1.6551
cPLA2	12.812	4.08463	5.31366	2.7665	2.91027	1.19346	3.23283	0.309326	1.6928	cPLA2	5.41922	7.92483	3.37494	5.56606	2.59764	5.79687	4.96085	1.66862	0.599297	0.738657
EP4	2.28421	0.796837	2.95678	0.167206	0.0713737	0.674469	6.61283	0.151221	2.72527	EP4	0.694607	1.60404	0.784689	2.18546	0.714388	0.91684	1.54829	1.65711	0.603461	0.728667
CBR1	1.6051	0.643923	1.41592	0.270238	0	0.155725	8.60393	0.116226	3.105	CBR1	0.298815	0.270677	0.142133	0.209289	0.331624	0.127632	0.181948	1.43623	0.696269	0.522282
TEX36	0.193157	0	0	2.11381	0	0	0.0913785	10.9435	-3.452	TEX36	1.04983	0.752897	1.06943	38.4415	37.7884	54.5126	114.021	0.200239	4.99404	-2.32021
TEX47	2.80296	1.77548	1.30137	4.59491	4.13483	3.50659	0.48052	2.08108	-1.05733	TEX47	8.53989	7.55125	5.93976	52.1889	55.2822	47.7083	68.4513	0.432915	2.30992	-1.20784
NSD2	1.204	1.87839	0.70069	6.13754	1.58635	2.79048	0.359801	2.77932	-1.47473	NSD2	17.4462	12.9818	17.8537	55.3533	49.3315	62.7513	74.4476	0.555593	1.79988	-0.8479
BMP-2	14.8647	4.12277	2.91393	1.39035	11.2525	23.0032	0.614412	1.62757	-0.702722	BMP-2	1.85177	1.29437	1.03171	0.975317	0.553371	1.47754	0.705919	1.88289	0.531098	0.91295
ZEB2	2.86931	0.990182	1.73505	8.33703	6.65189	9.87787	0.22498	4.44484	-2.15213	ZEB2	1.81227	2.0675	2.40144	13.4468	6.56906	7.27949	12.3296	0.753608	1.32695	-0.408114
Par3	9.41313	6.78883	6.35605	21.5463	18.0905	19.445	0.38181	2.6191	-1.38907	Par3	2.54551	2.66657	3.02585	6.20195	5.00869	6.1006	8.1075	0.75142	1.33081	-0.412308
FBOX11	8.20321	4.09627	4.12198	29.3703	0.895505	48.8097	0.207668	4.81537	-2.26765	FBOX11	5.39982	4.92584	7.88015	36.2996	32.3134	30.9	37.4313	0.541563	1.84651	-0.8848
CDKL	2.29033	0.987975	1.14054	36.6945	28.8314	41.5021	0.0412868	24.2208	-4.59817	CDKL	4.39589	5.94859	6.62144	8.45581	12.835	8.14946	9.79996	0.825797	1.21095	-0.276141
LIN9	19.3097	25.3501	18.6672	54.3319	53.4814	74.936	0.346524	2.88581	-1.52897	LIN9	19.287	13.277	18.0437	16.8528	18.6072	17.7173	25.2882	1.09491	0.913315	0.130816
UPF1	11.2108	9.25945	6.18091	17.6602	16.4099	259.757	0.0907033	11.025	-3.4627	UPF1	50.9732	45.9929	55.01	70.7366	71.5282	64.2169	102.281	0.935665	1.06876	-0.0959354
STPG2	19.7148	7.87325	13.7713	120.678	145.724	87.5863	0.116838	8.55883	-3.09741	STPG2	4.29625	5.02973	3.8064	65.493	49.368	66.537	64.3387	0.436217	2.29244	-1.19688
SPTA4	28.4029	22.0387	23.9727	128.404	144.02	161.084	0.171656	5.82562	-2.54241	SPTA4	12.973	20.3376	16.8787	327.173	310.757	372.776	209.663	0.422485	2.36695	-1.24303
SPATA18	75.4976	14.2555	31.668	177.805	185.243	164.091	0.23034	4.34141	-2.11816	SPATA18	6.31413	4.36669	2.68642	10.4356	5.3103	8.99479	10.12	0.974525	1.02614	-0.037229
SPAG8	54.9243	33.3039	34.5727	176.894	204.234	198.477	0.21187	4.71987	-2.23875	SPAG8	4.89702	2.50278	4.43499	115.826	98.7392	100.102	97.9392	0.430154	2.32475	-1.21707
SPAG6	42.5637	16.8734	34.3921	175.711	199.309	176.645	0.170083	5.87947	-2.55569	SPAG6	5.32361	6.67698	3.90065	147.343	153.045	132.155	175.537	0.354312	2.82237	-1.49691
DPY30	279.208	376.299	314.641	589.627	682.931	933.847	0.439696	2.2743	-1.18542	DPY30	111.769	99.863	123.429	154.818	163.861	141.862	165.769	1.039	0.962465	0.0551942
HMGB2	992.143	727.015	643.839	3068.21	2677.05	975.138	0.351616	2.84401	-1.50793	HMGB2	459.033	408.7	314.354	1007.47	1573.07	1140.44	1425.24	0.529037	1.89023	-0.918559
