# Supplementary material for: Gonad Transcriptome and Whole-Genome DNA Methylation Analyses Reveal Potential Sex Determination/Differentiation Mechanisms of the Deep-Sea Mussel Gigantidas platifrons
Source: Frontiers journal article supplement (doi:10.3389/fmars.2022.856291), 2022-04-28
Supplement: Table_4.XLSX [file Table_4.XLSX]

## Sheet: F_TTS2K_5mC_vs_gene_express
Gene	F_5mC_level	expr_count	expr_ratio	group
CSbapl.11333	0.630252	0.0961708	0.00868627	F	expr_count：fpkm
CSbapl.11331	0.270492	4.63669	0.163588	F	expr_ratio：log10(fpkm+1)/max（log10(fpkm+1)）
CSbapl.11337	0.561497	0.579592	0.043247	F
CSbapl.11336	0.496397	6.25371	0.187447	F
CSbapl.11334	0.863823	1.52563	0.0876442	F
CSbapl.95455	0.663752	0.429434	0.0337978	F
CSbapl.95453	0.819885	8.35175	0.21148	F
CSbapl.95450	0.0833333	0	0	F
CSbapl.64449	0.465517	0.344315	0.0279901	F
CSbapl.24060	0.802108	5.77579	0.180999	F
CSbapl.24066	0.158038	0	0	F
CSbapl.24065	0.107143	0.225771	0.0192573	F
CSbapl.64442	0.146667	0.131093	0.011653	F
CSbapl.67181	0.5	0.216726	0.0185567	F
CSbapl.67182	0.111111	0.484918	0.0374002	F
CSbapl.67184	0.142857	1.51099	0.087094	F
CSbapl.20762	0.137931	1.41715	0.0834911	F
CSbapl.63870	0.181818	0.0302986	0.00282362	F
CSbapl.63874	0.182336	0.113464	0.010167	F
CSbapl.62694	0.242424	0	0	F
CSbapl.55998	0.0833333	0	0	F
CSbapl.62692	0.166667	0	0	F
CSbapl.90563	0.152838	0.0720545	0.00658183	F
CSbapl.44200	0.111111	64.9783	0.396301	F
CSbapl.44203	0.0813953	0	0	F
CSbapl.38639	0.15	0	0	F
CSbapl.53604	0.44086	0.0592397	0.00544424	F
CSbapl.17502	0.442105	1.27716	0.0778476	F
CSbapl.38631	0.153846	0	0	F
CSbapl.38637	0.116337	0.446377	0.0349125	F
CSbapl.21028	0.22807	0.162684	0.0142589	F
CSbapl.93113	0.081761	0.29697	0.0245984	F
CSbapl.93114	0.0566038	0.147917	0.0130497	F
CSbapl.94321	0.151515	0.175401	0.0152879	F
CSbapl.93116	0.15	8.9212	0.217071	F
CSbapl.69800	0.210526	0	0	F
CSbapl.69801	0.661628	26.7015	0.314206	F
CSbapl.69807	0.206522	3.85928	0.149549	F
CSbapl.69805	0.078125	0	0	F
CSbapl.65319	0.739715	0.817429	0.056515	F
CSbapl.65313	0.15	3.41589	0.140498	F
CSbapl.65315	0.115385	0	0	F
CSbapl.63251	0.106796	0	0	F
CSbapl.63259	0.84456	1.10754	0.0705249	F
CSbapl.15360	0.674528	1.53482	0.0879875	F
CSbapl.15361	0.494994	4.99216	0.169373	F
CSbapl.15362	0.808511	0.0395703	0.0036711	F
CSbapl.15363	0.640351	5.38318	0.175353	F
CSbapl.16949	0.107143	0	0	F
CSbapl.15365	0.875	68.1582	0.400754	F
CSbapl.15366	0.625969	0.89855	0.0606458	F
CSbapl.16945	0.242857	0	0	F
CSbapl.15369	0.830986	1.31474	0.0793959	F
CSbapl.16947	0.129032	0	0	F
CSbapl.16940	0.111111	0	0	F
CSbapl.53903	0.0833333	0.0767423	0.00699458	F
CSbapl.26335	0.2	0.191318	0.0165603	F
CSbapl.26337	0.700544	15.0922	0.262824	F
CSbapl.26330	0.0769231	0	0	F
CSbapl.8131	0.0851064	0.107405	0.00965079	F
CSbapl.45153	0.735849	7.59915	0.203543	F
CSbapl.66759	0.833443	0.391194	0.0312327	F
CSbapl.45157	0.763889	3.53543	0.143025	F
CSbapl.66753	0.137931	0	0	F
CSbapl.45158	0.568421	0.373899	0.0300493	F
CSbapl.57591	0.817073	5.12902	0.171509	F
CSbapl.92242	0.1	0.362665	0.0292726	F
CSbapl.92241	0.153846	0	0	F
CSbapl.22651	0.376045	3.95884	0.151468	F
CSbapl.99011	0.115385	2.32275	0.113592	F
CSbapl.99015	0.109091	0.202216	0.0174218	F
CSbapl.99018	0.0769231	1.37828	0.0819573	F
CSbapl.99019	0.111111	1.32633	0.0798684	F
CSbapl.13403	0.732484	8.65277	0.214477	F
CSbapl.13402	0.711656	11.0805	0.235699	F
CSbapl.13401	0.711921	13.31	0.251721	F
CSbapl.13400	0.136364	0.291433	0.0241936	F
CSbapl.13407	0.123077	0	0	F
CSbapl.13406	0.166667	0	0	F
CSbapl.13405	0.1	0	0	F
CSbapl.57606	0.867257	13.4501	0.252643	F
CSbapl.97146	0.132075	0	0	F
CSbapl.97147	0.2	0	0	F
CSbapl.97144	0.0909091	0	0	F
CSbapl.13408	0.0833333	0	0	F
CSbapl.97143	0.714286	1.43328	0.0841204	F
CSbapl.50659	0.166667	0	0	F
CSbapl.50658	0.133333	0	0	F
CSbapl.58407	0.0571429	0	0	F
CSbapl.5559	0.675862	3.55413	0.143414	F
CSbapl.58405	0.144928	0.161265	0.0141433	F
CSbapl.5556	0.783133	7.74091	0.20509	F
CSbapl.58408	0.0571429	0	0	F
CSbapl.5552	0.142857	0	0	F
CSbapl.5550	0.0923077	0	0	F
CSbapl.9669	0.0853659	0	0	F
CSbapl.22055	0.857432	9.24107	0.220073	F
CSbapl.22056	0.784062	47.1077	0.36642	F
CSbapl.50386	0.142857	0.0854852	0.00775959	F
CSbapl.22050	0.786499	4.1568	0.155171	F
CSbapl.22052	0.443609	0.0600541	0.00551695	F
CSbapl.67404	0.736961	0.0708391	0.00647452	F
CSbapl.67405	0.0991736	1.57871	0.0896115	F
CSbapl.7953	0.710938	1.83039	0.0984209	F
CSbapl.7952	0.701571	9.50701	0.222498	F
CSbapl.7955	0.633008	54.8732	0.380575	F
CSbapl.67187	0.885714	4.3118	0.157972	F
CSbapl.67403	0.133333	3.09505	0.133362	F
CSbapl.7958	0.645161	5.50514	0.177143	F
CSbapl.67408	0.15	0.44686	0.0349441	F
CSbapl.76123	0.105882	0.161107	0.0141304	F
CSbapl.23901	0.467302	67.9845	0.400516	F
CSbapl.23902	0.115385	7.33824	0.200628	F
CSbapl.23907	0.508914	2.19724	0.10995	F
CSbapl.6393	0.0720721	0.192876	0.016684	F
CSbapl.6394	0.668227	14.6196	0.260005	F
CSbapl.18205	0.166667	0.0230902	0.00215945	F
CSbapl.6396	0.381532	0	0	F
CSbapl.6397	0.142857	0.0250742	0.00234272	F
CSbapl.6399	0.146965	0	0	F
CSbapl.92938	0.784332	2.83039	0.127042	F
CSbapl.92939	0.659705	0.388483	0.0310482	F
CSbapl.42311	0.0892857	47.6898	0.367557	F
CSbapl.42310	0.117647	0.342196	0.0278408	F
CSbapl.42313	0.194175	3.04594	0.132221	F
CSbapl.92937	0.7103	6.9721	0.19638	F
CSbapl.92930	0.739726	0.0453582	0.00419632	F
CSbapl.42314	0.0647482	0	0	F
CSbapl.92932	0.0952381	0	0	F
CSbapl.92933	0.121951	0.136892	0.0121367	F
CSbapl.84955	0.166667	0	0	F
CSbapl.12758	0.102041	10.4785	0.230864	F
CSbapl.12754	0.0542857	0	0	F
CSbapl.12752	0.0482759	0	0	F
CSbapl.12753	0.0872483	0	0	F
CSbapl.56552	0.5625	1.62458	0.0912796	F
CSbapl.56553	0.0939597	0	0	F
CSbapl.56550	0.0875	0	0	F
CSbapl.56556	0.6	0.0377367	0.00350411	F
CSbapl.96230	0.151515	0	0	F
CSbapl.98050	0.0967742	0	0	F
CSbapl.98055	0.144	0.632289	0.0463514	F
CSbapl.91299	0.0847458	1.4791	0.0858849	F
CSbapl.84958	0.119403	53.5824	0.378364	F
CSbapl.98525	0.1	0	0	F
CSbapl.86666	0.231788	0.538801	0.040772	F
CSbapl.10453	0.1	0	0	F
CSbapl.10452	0.133333	0	0	F
CSbapl.91297	0.0875	0.568823	0.0425999	F
CSbapl.7044	0.7625	28.0432	0.31868	F
CSbapl.16129	0.111111	0	0	F
CSbapl.91293	0.0841121	0	0	F
CSbapl.39348	0.743889	0.618096	0.0455253	F
CSbapl.99909	0.166667	1.09626	0.070017	F
CSbapl.2678	0.075	0	0	F
CSbapl.2677	0.166667	0	0	F
CSbapl.99905	0.0731707	0.151324	0.0133301	F
CSbapl.2675	0.551595	2.00217	0.103995	F
CSbapl.99900	0.735652	0.123899	0.0110494	F
CSbapl.99903	0.836173	0.227656	0.0194027	F
CSbapl.37417	0.2	0.129885	0.0115519	F
CSbapl.37415	0.0779221	0	0	F
CSbapl.80488	0.107865	0.0993136	0.0089571	F
CSbapl.80485	0.0884956	8.08802	0.208774	F
CSbapl.37418	0.325723	20.9739	0.292294	F
CSbapl.4631	0.9	1.72927	0.0949795	F
CSbapl.4632	0.790284	78.6887	0.414162	F
CSbapl.4635	0.562667	12.56	0.246629	F
CSbapl.4637	0.563941	16.3781	0.270097	F
CSbapl.4639	0.75	0.214432	0.0183781	F
CSbapl.47557	0.113208	1.50293	0.08679	F
CSbapl.80736	0.35625	0	0	F
CSbapl.40262	0.733734	2.75159	0.125075	F
CSbapl.40261	0.766716	292.292	0.537427	F
CSbapl.40260	0.0755814	0.408833	0.0324245	F
CSbapl.81283	0.714663	2.8099	0.126534	F
CSbapl.44944	0.104478	8.49336	0.212901	F
CSbapl.44945	0.130435	0	0	F
CSbapl.81287	0.534979	19.4921	0.28569	F
CSbapl.44940	0.116667	0	0	F
CSbapl.90300	0.147632	0	0	F
CSbapl.90302	0.0813953	0.219347	0.0187602	F
CSbapl.44948	0.38349	2.40425	0.115885	F
CSbapl.90306	0.0745342	0.885054	0.059971	F
CSbapl.4099	0.0324675	0	0	F
CSbapl.4097	0.142857	0	0	F
CSbapl.4096	0.159091	0.143349	0.0126725	F
CSbapl.4093	0.357616	0.11848	0.0105922	F
CSbapl.55140	0.704082	0.752751	0.0530871	F
CSbapl.55144	0.84375	0.0718554	0.00656426	F
CSbapl.82394	0.132353	0.252358	0.0212872	F
CSbapl.5943	0.214139	1.93687	0.101915	F
CSbapl.5945	0.528986	0.540919	0.0409021	F
CSbapl.5947	0.111111	0	0	F
CSbapl.72863	0.0612245	0	0	F
CSbapl.86881	0.142857	0	0	F
CSbapl.27819	0.0686016	0	0	F
CSbapl.27818	0.0714286	0.0212517	0.00198931	F
CSbapl.27817	0.62807	0.26944	0.0225688	F
CSbapl.27816	0.754076	8.08633	0.208756	F
CSbapl.27815	0.637879	0.0481468	0.00444834	F
CSbapl.86889	0.166667	0	0	F
CSbapl.27810	0.649457	0.325607	0.0266643	F
CSbapl.41135	0.756614	4.30681	0.157883	F
CSbapl.41136	0.603175	6.60247	0.191889	F
CSbapl.25523	0.12	0.608488	0.0449619	F
CSbapl.41139	0.716176	0.503006	0.0385456	F
CSbapl.22006	0.0555556	0	0	F
CSbapl.86776	0.2	0.0136248	0.00128017	F
CSbapl.86774	0.817992	0.21166	0.018162	F
CSbapl.68201	0.0516432	0.181976	0.0158156	F
CSbapl.79184	0.142857	2.60916	0.121414	F
CSbapl.79181	0.872236	0.163866	0.014355	F
CSbapl.35060	0.0420455	1.13661	0.0718208	F
CSbapl.38090	0.756522	0.171573	0.0149793	F
CSbapl.33888	0.707607	53.954	0.379006	F
CSbapl.33883	0.117647	0	0	F
CSbapl.33882	0.0967742	0	0	F
CSbapl.33885	0.204201	0.320468	0.0262969	F
CSbapl.1779	0.102128	0	0	F
CSbapl.33886	0.363057	1.5992	0.0903601	F
CSbapl.70377	0.0818713	1.43204	0.0840722	F
CSbapl.93117	0.0853659	0.17097	0.0149307	F
CSbapl.70371	0.153846	3.69108	0.146217	F
CSbapl.94320	0.135714	0.0471894	0.00436189	F
CSbapl.70378	0.122449	0.0461854	0.00427115	F
CSbapl.78580	0.22973	0.270925	0.0226794	F
CSbapl.78583	0.117647	1.46099	0.0851914	F
CSbapl.78585	0.591068	41.8603	0.355494	F
CSbapl.78584	0.0847458	0.125293	0.0111667	F
CSbapl.78589	0.730159	2.84291	0.127351	F
CSbapl.53258	0.0795455	0.217879	0.0186463	F
CSbapl.53259	0.0684932	0.639156	0.0467485	F
CSbapl.88032	0.0695652	2.24373	0.111316	F
CSbapl.88030	0.097561	0.554029	0.0417036	F
CSbapl.88031	0.0666667	0.359377	0.0290441	F
CSbapl.53253	0.12	0	0	F
CSbapl.53250	0.206897	4.52346	0.161668	F
CSbapl.53251	0.479167	0.15514	0.013643	F
CSbapl.53256	0.111111	0	0	F
CSbapl.60763	0.0627178	0	0	F
CSbapl.52770	0.106667	0	0	F
CSbapl.87910	0.153846	1.30556	0.07902	F
CSbapl.87911	0.117647	0.124112	0.0110673	F
CSbapl.87916	0.333333	0.987069	0.0649567	F
CSbapl.87917	0.125	0	0	F
CSbapl.97739	0.0704225	0.318228	0.0261363	F
CSbapl.88699	0.617925	9.07857	0.21856	F
CSbapl.32820	0.0425532	0.260442	0.0218959	F
CSbapl.32824	0.237288	0.71704	0.0511398	F
CSbapl.32825	0.36087	0	0	F
CSbapl.32826	0.176471	0	0	F
CSbapl.32829	0.2	0.461848	0.0359189	F
CSbapl.89344	0.135135	4.89082	0.167759	F
CSbapl.89342	0.106061	0.0956136	0.00863817	F
CSbapl.89340	0.0612245	0	0	F
CSbapl.88963	0.0869565	0	0	F
CSbapl.73053	0.0873786	0	0	F
CSbapl.88966	0.0506329	0.0268775	0.00250898	F
CSbapl.73051	0.111111	0.00587359	0.000554004	F
CSbapl.88968	0.0930233	0.820992	0.0567003	F
CSbapl.85518	0.795133	3.38873	0.139914	F
CSbapl.85513	0.0986446	0.110912	0.00994996	F
CSbapl.41904	0.136364	2.71532	0.124156	F
CSbapl.41907	0.726368	1.30013	0.0787968	F
CSbapl.41901	0.801329	3.00528	0.131265	F
CSbapl.41900	0.0933333	2.09549	0.10689	F
CSbapl.41903	0.712843	1.08104	0.0693277	F
CSbapl.14527	0.0909091	0	0	F
CSbapl.41909	0.0530303	2.48178	0.118015	F
CSbapl.54053	0.636364	0.561744	0.0421721	F
CSbapl.51123	0.121951	0.724033	0.0515243	F
CSbapl.18166	0.704437	3.98495	0.151964	F
CSbapl.15162	0.582878	1.67646	0.0931312	F
CSbapl.15161	0.685658	42.9395	0.357846	F
CSbapl.15167	0.0646465	0	0	F
CSbapl.43215	0.0941176	0.0333956	0.00310755	F
CSbapl.43214	0.0511364	0.102669	0.00924538	F
CSbapl.43219	0.0714286	0.0639508	0.00586404	F
CSbapl.79977	0.724599	1.34139	0.0804787	F
CSbapl.79976	0.736929	0.351014	0.0284603	F
CSbapl.79975	0.695652	0.116625	0.0104352	F
CSbapl.79974	0.902174	2.70594	0.123917	F
CSbapl.79970	0.125	2.48605	0.118131	F
CSbapl.19315	0.2	1.9768	0.103192	F
CSbapl.19317	0.2	0.568093	0.0425559	F
CSbapl.19316	0.166667	0	0	F
CSbapl.37997	0.629442	5.28209	0.173843	F
CSbapl.37996	0.075	0	0	F
CSbapl.37995	0.083871	0	0	F
CSbapl.37994	0.730337	3.48988	0.14207	F
CSbapl.37991	0.0882353	0	0	F
CSbapl.73944	0.113208	0	0	F
CSbapl.73946	0.103448	0	0	F
CSbapl.243	0.843185	0.384979	0.0308091	F
CSbapl.242	0.495485	7.64183	0.204011	F
CSbapl.240	0.871955	23.7391	0.303506	F
CSbapl.246	0.203187	0	0	F
CSbapl.72098	0.125	0	0	F
CSbapl.40744	0.2	0	0	F
CSbapl.40743	0.181818	0.533157	0.0404245	F
CSbapl.97308	0.111111	0.303071	0.0250423	F
CSbapl.97309	0.126582	0	0	F
CSbapl.14690	0.0875	0	0	F
CSbapl.14696	0.0918367	0	0	F
CSbapl.97301	0.166667	0	0	F
CSbapl.14699	0.0675105	0	0	F
CSbapl.97305	0.117647	0.266579	0.0223553	F
CSbapl.97307	0.125	0	0	F
CSbapl.95237	0.0540541	0.0561034	0.00516373	F
CSbapl.95234	0.130435	0.126625	0.0112786	F
CSbapl.95235	0.0943396	0.757766	0.0533574	F
CSbapl.95233	0.2	0	0	F
CSbapl.95239	0.637199	4.14821	0.155013	F
CSbapl.64229	0.0727273	0	0	F
CSbapl.64228	0.767857	0.208606	0.0179233	F
CSbapl.9061	0.690239	1.60718	0.0906502	F
CSbapl.9064	0.105263	0	0	F
CSbapl.64220	0.512755	2.30381	0.113052	F
CSbapl.14343	0.130435	3.8027	0.148441	F
CSbapl.64222	0.570823	1.75279	0.0957914	F
CSbapl.64225	0.187755	6.2423	0.187298	F
CSbapl.64224	0.0652174	0	0	F
CSbapl.14347	0.119048	0	0	F
CSbapl.14346	0.166667	0	0	F
CSbapl.23310	0.101351	0	0	F
CSbapl.79537	0.111111	0	0	F
CSbapl.18446	0.255682	0.797411	0.0554673	F
CSbapl.18447	0.117647	0.433322	0.0340547	F
CSbapl.18449	0.11215	0.657591	0.0478065	F
CSbapl.75476	0.114754	0	0	F
CSbapl.75472	0.074364	1.73814	0.0952866	F
CSbapl.71549	0.166667	5.66787	0.179481	F
CSbapl.71543	0.0930233	0	0	F
CSbapl.71540	0.0909091	0	0	F
CSbapl.36118	0.102564	0	0	F
CSbapl.74328	0.539535	0.78845	0.0549945	F
CSbapl.36110	0.19337	0.233595	0.0198592	F
CSbapl.36113	0.166667	0	0	F
CSbapl.36114	0.125	0	0	F
CSbapl.36116	0.111111	0	0	F
CSbapl.98218	0.810888	0.737604	0.052266	F
CSbapl.24924	0.1	0.17073	0.0149112	F
CSbapl.98212	0.333333	2.37363	0.11503	F
CSbapl.24928	0.151515	0	0	F
CSbapl.98217	0.126316	0	0	F
CSbapl.98216	0.0808824	0	0	F
CSbapl.98215	0.572314	0.086814	0.00787532	F
CSbapl.98214	0.9	2.07432	0.106241	F
CSbapl.45150	0.71831	0.709754	0.0507376	F
CSbapl.33697	0.175	0	0	F
CSbapl.33691	0.12	0.410675	0.0325482	F
CSbapl.38180	0.857923	5.22675	0.173006	F
CSbapl.32127	0.111111	0.0300283	0.0027988	F
CSbapl.91073	0.0757576	0	0	F
CSbapl.32121	0.16	6.78236	0.194102	F
CSbapl.91075	0.125	0	0	F
CSbapl.32122	0.117647	0.853709	0.0583848	F
CSbapl.91079	0.0740741	0.139726	0.0123722	F
CSbapl.32129	0.0855615	3.27371	0.137402	F
CSbapl.32128	0.122449	0.0691135	0.00632196	F
CSbapl.611	0.680899	3.4884	0.142039	F
CSbapl.8898	0.156522	1.17832	0.0736497	F
CSbapl.23657	0.0947368	0	0	F
CSbapl.23651	0.788168	0.579488	0.0432408	F
CSbapl.8891	0.153846	0	0	F
CSbapl.74704	0.0825	1.09979	0.0701762	F
CSbapl.23659	0.122807	0.13622	0.0120808	F
CSbapl.74700	0.155172	0.730628	0.0518855	F
CSbapl.18998	0.0895522	0	0	F
CSbapl.70639	0.107143	2.44648	0.117051	F
CSbapl.18990	0.0717703	0	0	F
CSbapl.70636	0.181818	0.0590096	0.00542369	F
CSbapl.70635	0.1	0.282339	0.0235251	F
CSbapl.18993	0.0909091	0	0	F
CSbapl.18994	0.121951	0.0467059	0.0043182	F
CSbapl.18995	0.0943396	0	0	F
CSbapl.70631	0.859794	0.592742	0.0440313	F
CSbapl.70630	0.101695	0.117791	0.0105339	F
CSbapl.69309	0.076087	0.0242731	0.00226876	F
CSbapl.66173	0.106061	0	0	F
CSbapl.69303	0.790062	2.57195	0.120434	F
CSbapl.66177	0.0531915	0	0	F
CSbapl.66176	0.0454545	0	0	F
CSbapl.69307	0.106383	0.243249	0.0205966	F
CSbapl.85092	0.838472	6.26371	0.187577	F
CSbapl.12341	0.152542	0.207515	0.0178379	F
CSbapl.12347	0.689223	5.07487	0.17067	F
CSbapl.97891	0.892562	43.3488	0.358723	F
CSbapl.36808	0.0612245	0.0559668	0.00515149	F
CSbapl.36809	0.15	0	0	F
CSbapl.97894	0.753731	0.116355	0.0104123	F
CSbapl.97897	0.2	1.10234	0.0702912	F
CSbapl.36802	0.0862069	0.11394	0.0102075	F
CSbapl.36803	0.0833333	0.0748521	0.00682837	F
CSbapl.36806	0.111111	0	0	F
CSbapl.36807	0.08	0	0	F
CSbapl.100179	0.153846	0.0952664	0.00860818	F
CSbapl.50876	0.266667	0	0	F
CSbapl.34402	0.770833	0.388815	0.0310708	F
CSbapl.50874	0.2	0.267204	0.022402	F
CSbapl.34404	0.753425	13.3656	0.252088	F
CSbapl.28123	0.117647	0	0	F
CSbapl.28120	0.15625	0.104719	0.00942114	F
CSbapl.28121	0.103448	0	0	F
CSbapl.50879	0.918919	3.97612	0.151797	F
CSbapl.28129	0.166667	0	0	F
CSbapl.95790	1	1.52608	0.087661	F
CSbapl.95793	0.222812	3.89148	0.150174	F
CSbapl.95795	0.458484	1.47734	0.085818	F
CSbapl.95794	0.159091	0.829713	0.0571522	F
CSbapl.64764	0.104651	0.237706	0.0201739	F
CSbapl.64766	0.224299	1.54409	0.0883331	F
CSbapl.34335	0.759036	0.99026	0.0651085	F
CSbapl.47961	0.0942029	0.185619	0.0161067	F
CSbapl.47963	0.868565	11.7346	0.240688	F
CSbapl.47965	0.883795	391.531	0.564997	F
CSbapl.47966	0.771071	12.4523	0.245875	F
CSbapl.47969	0.2	0.044823	0.00414788	F
CSbapl.62086	0.0943396	0	0	F
CSbapl.62082	0.157895	0.102699	0.009248	F
CSbapl.62080	0.142857	1.55832	0.0888605	F
CSbapl.11104	0.142857	0	0	F
CSbapl.67225	0.582734	2.08934	0.106702	F
CSbapl.67226	0.148148	0	0	F
CSbapl.67227	0.128205	0.342461	0.0278595	F
CSbapl.11102	0.1	0	0	F
CSbapl.81772	0.0882353	3.53301	0.142974	F
CSbapl.39757	0.101266	0	0	F
CSbapl.67229	0.157895	0	0	F
CSbapl.39755	0.2	0	0	F
CSbapl.90671	0.142857	0.0259743	0.00242575	F
CSbapl.63931	0.0909091	0.488988	0.0376591	F
CSbapl.63939	0.119403	0	0	F
CSbapl.9853	0.819287	3.9473	0.151247	F
CSbapl.61687	0.690476	37.8641	0.346235	F
CSbapl.9856	0.0952381	0	0	F
CSbapl.3833	0.181818	0.0379875	0.00352696	F
CSbapl.9854	0.762984	4.9174	0.168185	F
CSbapl.3831	0.0909091	0	0	F
CSbapl.10859	0.153846	0.111402	0.00999168	F
CSbapl.9859	0.0415094	0	0	F
CSbapl.61688	0.429561	2.26698	0.111991	F
CSbapl.61689	0.762729	10.6513	0.232277	F
CSbapl.62337	0.026087	0.18491	0.0160501	F
CSbapl.62336	0.0909091	0.259757	0.0218444	F
CSbapl.62332	0.642857	0.476695	0.0368749	F
CSbapl.62338	0.41716	0.260762	0.0219199	F
CSbapl.25725	0.729069	1.73995	0.0953489	F
CSbapl.25721	0.615385	0.732965	0.0520131	F
CSbapl.25720	0.816578	1.23908	0.0762519	F
CSbapl.90452	0.412621	9.46762	0.222143	F
CSbapl.25729	0.767606	15.4602	0.264963	F
CSbapl.63683	0.101952	0	0	F
CSbapl.63680	0.243506	3.98631	0.15199	F
CSbapl.63684	0.0778643	0.118711	0.0106117	F
CSbapl.96857	0.2	0.14897	0.0131365	F
CSbapl.96854	0.166667	0	0	F
CSbapl.86571	0.0797101	0	0	F
CSbapl.96852	0.636364	0.414681	0.0328164	F
CSbapl.86573	0.11236	10.4005	0.230219	F
CSbapl.29658	0.125	8.08955	0.208789	F
CSbapl.21403	0.25641	3.01152	0.131413	F
CSbapl.21400	0.629091	2.07712	0.106328	F
CSbapl.21401	0.796224	6.93585	0.195949	F
CSbapl.21407	0.351706	0	0	F
CSbapl.21405	0.102273	34.8183	0.338515	F
CSbapl.21409	0.125	0	0	F
CSbapl.83961	0.048951	0	0	F
CSbapl.25899	0.852996	3.4351	0.140908	F
CSbapl.25898	0.28385	0.152867	0.0134567	F
CSbapl.25895	0.04	0	0	F
CSbapl.25894	0.123596	0.042332	0.00392208	F
CSbapl.80807	0.175	0.233346	0.0198401	F
CSbapl.80805	0.612654	0	0	F
CSbapl.25892	0.0983607	1.06398	0.0685492	F
CSbapl.44430	0.0869565	0	0	F
CSbapl.44431	0.0759494	0.910349	0.0612319	F
CSbapl.83965	0.09375	0.485677	0.0374486	F
CSbapl.29387	0.0290557	0.0577762	0.00531345	F
CSbapl.38404	0.605206	22.1378	0.297176	F
CSbapl.60796	0.181818	0	0	F
CSbapl.40908	0.179825	0.0989579	0.00892648	F
CSbapl.60793	0.0925926	0.339185	0.0276284	F
CSbapl.60792	0.685714	2.09114	0.106757	F
CSbapl.60798	0.66573	4.79809	0.166258	F
CSbapl.91123	0.115942	0	0	F
CSbapl.904	0.157895	0.322989	0.0264774	F
CSbapl.59255	0.128205	0.875903	0.0595106	F
CSbapl.59256	0.116667	0.419529	0.03314	F
CSbapl.907	0.711198	0.680662	0.0491141	F
CSbapl.93327	0.0869565	0.167551	0.014654	F
CSbapl.902	0.762911	11.1767	0.23645	F
CSbapl.59253	0.717803	4.66152	0.164004	F
CSbapl.93328	0.857434	13.9311	0.25574	F
CSbapl.53695	0.6875	0.406109	0.0322414	F
CSbapl.59258	0.104	1.07537	0.0690698	F
CSbapl.59259	0.306818	0.836717	0.0575136	F
CSbapl.31317	0.0675676	0.0525238	0.00484256	F
CSbapl.5296	0.122449	21.0976	0.292825	F
CSbapl.78091	0.0965517	1.05278	0.0680346	F
CSbapl.8073	0.338509	45.3839	0.362968	F
CSbapl.8071	0.404326	9.55929	0.222968	F
CSbapl.8077	0.073913	0	0	F
CSbapl.8076	0.0496183	4.22795	0.156467	F
CSbapl.8074	0.630435	0.296596	0.0245711	F
CSbapl.60240	0.107143	0	0	F
CSbapl.60246	0.83642	0.386435	0.0309085	F
CSbapl.6929	0.272727	0.0322611	0.00300364	F
CSbapl.60244	0.845161	3.85823	0.149528	F
CSbapl.54568	0.0918367	4.24517	0.156778	F
CSbapl.47658	0.720976	3.36111	0.139317	F
CSbapl.6923	0.112676	4.48061	0.160931	F
CSbapl.6922	0.0879121	21.4386	0.294274	F
CSbapl.6920	0.650061	9.04689	0.218262	F
CSbapl.27769	0.08	0.11606	0.0103873	F
CSbapl.27768	0.181818	0	0	F
CSbapl.27764	0.2	0.0812566	0.00739036	F
CSbapl.27766	0.125	0.104202	0.00937681	F
CSbapl.58612	0.08	18.3532	0.28028	F
CSbapl.58611	0.0714286	0	0	F
CSbapl.58617	0.253247	3.21625	0.136121	F
CSbapl.58616	0.0833333	0.0980321	0.00884676	F
CSbapl.5748	0.121739	0	0	F
CSbapl.5749	0.741627	0	0	F
CSbapl.5746	0.0775194	0	0	F
CSbapl.5744	0.125	0	0	F
CSbapl.5745	0.111111	0	0	F
CSbapl.5741	0.09	0	0	F
CSbapl.50654	0.0763359	0	0	F
CSbapl.27499	0.0694864	0	0	F
CSbapl.27492	0.0930233	0.761726	0.0535702	F
CSbapl.27491	0.0932203	0	0	F
CSbapl.27490	0.0891089	0.415096	0.0328442	F
CSbapl.27497	0.0909091	0	0	F
CSbapl.27496	0.140625	0.766371	0.0538193	F
CSbapl.42876	0.108434	0	0	F
CSbapl.82983	0.212121	0.485188	0.0374174	F
CSbapl.82987	0.153846	0.0275125	0.00256747	F
CSbapl.82989	0.650284	7.71187	0.204775	F
CSbapl.45479	0.862159	8.2501	0.210446	F
CSbapl.45478	0.074813	0.171695	0.0149892	F
CSbapl.83058	0.642173	1.87971	0.100055	F
CSbapl.45471	0.822493	21.7763	0.295687	F
CSbapl.45470	0.66844	90.93	0.42768	F
CSbapl.83057	0.800643	1.28696	0.0782535	F
CSbapl.83056	0.784038	6.37484	0.189014	F
CSbapl.83051	0.129032	0	0	F
CSbapl.83053	0.171429	0	0	F
CSbapl.83052	0.0943396	0	0	F
CSbapl.50020	0.0738636	0	0	F
CSbapl.50023	0.0714286	0.589461	0.0438362	F
CSbapl.57036	0.15625	0	0	F
CSbapl.57034	0.0660377	0	0	F
CSbapl.50029	0.621302	0.727843	0.0517331	F
CSbapl.55762	0.962589	0	0	F
CSbapl.5558	0.543689	0.0332443	0.00309369	F
CSbapl.17197	0.166667	0	0	F
CSbapl.6219	0.125749	0.0289428	0.00269906	F
CSbapl.17190	0.0869565	0.080168	0.00729507	F
CSbapl.6217	0.0323944	0	0	F
CSbapl.6216	0.58671	6.05395	0.184805	F
CSbapl.6211	0.108108	0	0	F
CSbapl.42298	0.107143	0	0	F
CSbapl.42294	0.760341	5.92717	0.18309	F
CSbapl.42295	0.35	0.0200726	0.00188002	F
CSbapl.42296	0.599042	1.87279	0.0998277	F
CSbapl.42290	0.121212	0.232483	0.0197739	F
CSbapl.42292	0.0957447	0	0	F
CSbapl.42293	0.719277	2.21802	0.110563	F
CSbapl.11935	0.140562	1.98678	0.103509	F
CSbapl.11934	0.702079	150.961	0.475224	F
CSbapl.11937	0.225296	0.135086	0.0119864	F
CSbapl.11936	0.711111	76.324	0.411312	F
CSbapl.11932	0.77551	4.04384	0.153075	F
CSbapl.11938	0.616514	2.98158	0.130704	F
CSbapl.74108	0.125	0	0	F
CSbapl.17440	0.0234192	0	0	F
CSbapl.17446	0.902439	0	0	F
CSbapl.53647	0.820789	1.17932	0.0736932	F
CSbapl.53646	0.786299	1.57674	0.0895392	F
CSbapl.98155	0.588595	5.02187	0.169841	F
CSbapl.35532	0.147059	0	0	F
CSbapl.98151	0.0538462	0	0	F
CSbapl.98152	0.0451977	0	0	F
CSbapl.98153	0.107143	0	0	F
CSbapl.42129	0.513854	0.210738	0.0180899	F
CSbapl.42123	0.0544218	0	0	F
CSbapl.42124	0.106719	1.64288	0.0919369	F
CSbapl.42125	0.0458015	0	0	F
CSbapl.101346	0.0909091	0.438317	0.0343838	F
CSbapl.101343	0.0385542	0	0	F
CSbapl.30772	0.219953	0	0	F
CSbapl.100438	0.822289	3.60031	0.144368	F
CSbapl.30771	0.747573	0.0720141	0.00657827	F
CSbapl.43454	0.0516605	0.230276	0.0196043	F
CSbapl.43457	0.0357143	0	0	F
CSbapl.43456	0.09375	0	0	F
CSbapl.43451	0.2	0	0	F
CSbapl.30778	0.818869	0.0786625	0.00716313	F
CSbapl.100431	0.136364	0	0	F
CSbapl.53968	0.0909091	0	0	F
CSbapl.3193	0.625755	2.72254	0.12434	F
CSbapl.3194	0.840764	0.237999	0.0201963	F
CSbapl.51869	0.642234	0.383384	0.0307001	F
CSbapl.51868	0.719178	2.08134	0.106457	F
CSbapl.51867	0.649351	0	0	F
CSbapl.51866	0.649351	0.0722203	0.00659646	F
CSbapl.51865	0.303125	0.511293	0.0390657	F
CSbapl.47519	0.0916667	0	0	F
CSbapl.85060	0.125	0	0	F
CSbapl.47510	0.590164	2.18814	0.10968	F
CSbapl.47511	0.125	0.193883	0.0167638	F
CSbapl.47512	0.0680628	0.559124	0.0420132	F
CSbapl.85069	0.112903	0	0	F
CSbapl.56079	0.709677	1.44009	0.0843846	F
CSbapl.56078	0.783848	0.250825	0.0211713	F
CSbapl.56071	0.555249	1.86696	0.0996355	F
CSbapl.56070	0.800703	16.8536	0.272651	F
CSbapl.56073	0.797395	1.51195	0.0871301	F
CSbapl.3167	1	0.534804	0.040526	F
CSbapl.56075	0.705244	10.1517	0.228131	F
CSbapl.56077	0.705379	0.999749	0.0655584	F
CSbapl.43989	0.160099	0.0643855	0.00590269	F
CSbapl.43981	0.715842	3.75368	0.147471	F
CSbapl.43980	0.101266	0	0	F
CSbapl.43987	0.106383	0	0	F
CSbapl.43986	0.0927835	0	0	F
CSbapl.43985	0.0952381	0	0	F
CSbapl.43984	0.0535714	0	0	F
CSbapl.64654	0.0909091	0	0	F
CSbapl.16719	0.0985915	0	0	F
CSbapl.16715	0.114286	0	0	F
CSbapl.16716	0.282051	17.9637	0.278357	F
CSbapl.50387	0.142857	0.0649358	0.00595159	F
CSbapl.72285	0.268293	0.921739	0.0617942	F
CSbapl.72773	0.0759494	0.864696	0.0589438	F
CSbapl.16196	0.580583	55.78	0.382098	F
CSbapl.89891	0.148883	0	0	F
CSbapl.89897	0.830645	0.397641	0.03167	F
CSbapl.89896	0.917742	4.52086	0.161624	F
CSbapl.89894	0.769784	13.1638	0.25075	F
CSbapl.89899	0.0504202	0	0	F
CSbapl.52519	0.125	0.165279	0.0144697	F
CSbapl.2822	0.769802	7.55269	0.20303	F
CSbapl.37207	0.114286	0	0	F
CSbapl.37206	0.925081	55.9644	0.382405	F
CSbapl.77629	0.142857	0.0556593	0.00512394	F
CSbapl.40188	0.0585106	0	0	F
CSbapl.37200	0.0880829	0	0	F
CSbapl.77625	0.0754717	0.276675	0.0231064	F
CSbapl.40187	0.0855263	0	0	F
CSbapl.77627	0.2	0.0526689	0.0048556	F
CSbapl.77621	0.109091	0	0	F
CSbapl.77620	0.142857	0	0	F
CSbapl.40180	0.116667	0	0	F
CSbapl.77622	0.1	0	0	F
CSbapl.7956	0.1125	0	0	F
CSbapl.81367	0.116667	0.562256	0.0422031	F
CSbapl.81361	0.71692	3.43775	0.140965	F
CSbapl.81363	0.719466	0.156303	0.0137382	F
CSbapl.81362	0.435279	12.5938	0.246864	F
CSbapl.44297	0.266667	0	0	F
CSbapl.57850	0.0632184	0.309018	0.0254731	F
CSbapl.57852	0.100917	0	0	F
CSbapl.49375	0.208247	5.97036	0.183678	F
CSbapl.49372	0.166667	0.162555	0.0142483	F
CSbapl.49370	0.113636	2.67105	0.123022	F
CSbapl.74894	0.2	0	0	F
CSbapl.76242	0.770195	1.89677	0.100614	F
CSbapl.41581	0.084507	14.4164	0.258766	F
CSbapl.41583	0.0471204	0	0	F
CSbapl.41582	0.081761	0.288218	0.0239578	F
CSbapl.45804	0.583459	1.60119	0.0904326	F
CSbapl.45807	0.127451	0	0	F
CSbapl.45808	0.121739	0	0	F
CSbapl.73888	0.113433	0	0	F
CSbapl.71708	0.0714286	0	0	F
CSbapl.71700	0.0833333	101.288	0.437779	F
CSbapl.71701	0.0604027	1.2751	0.0777619	F
CSbapl.71703	0.0464135	3.72029	0.146804	F
CSbapl.71704	0.0454545	0.247073	0.0208871	F
CSbapl.71705	0.0520134	0.0693835	0.00634585	F
CSbapl.71706	0.0392954	4.24276	0.156734	F
CSbapl.79579	0.710648	7.69811	0.204625	F
CSbapl.79578	0.846037	99.3065	0.435929	F
CSbapl.79573	0.736702	36.0943	0.341826	F
CSbapl.79572	0.164557	6.19717	0.186707	F
CSbapl.79571	0.700077	3.83896	0.149153	F
CSbapl.79570	0.842105	0	0	F
CSbapl.79577	0.717624	44.7823	0.361733	F
CSbapl.79575	0.729271	3.07591	0.132919	F
CSbapl.79574	0.712575	38.0396	0.346661	F
CSbapl.73636	0.323377	47.8099	0.36779	F
CSbapl.73637	0.632721	0	0	F
CSbapl.73635	0.677193	33.143	0.333983	F
CSbapl.78620	0.0568182	22.2119	0.297479	F
CSbapl.73633	0.0967742	0	0	F
CSbapl.73630	0.824121	0.0996047	0.00898214	F
CSbapl.73631	0.0501672	0	0	F
CSbapl.43950	0.184211	0.304193	0.0251238	F
CSbapl.18203	0.125	0.15585	0.0137012	F
CSbapl.43953	0.166667	0.236762	0.0201018	F
CSbapl.76284	0.129032	0.145509	0.0128511	F
CSbapl.76285	0.2	0	0	F
CSbapl.76287	0.159341	3.2539	0.136962	F
CSbapl.76280	0.763547	7.52057	0.202674	F
CSbapl.76282	0.667319	0.101108	0.00911137	F
CSbapl.86205	0.0993377	0	0	F
CSbapl.33456	0.194444	44.2301	0.360585	F
CSbapl.33457	0.826087	0.399336	0.0317847	F
CSbapl.33455	0.776995	3.90649	0.150464	F
CSbapl.33453	0.166667	0.153935	0.0135443	F
CSbapl.35154	0.0952381	1.16257	0.0729633	F
CSbapl.60128	0.659624	10.674	0.232461	F
CSbapl.35157	0.935484	0.674759	0.0487813	F
CSbapl.33458	0.761526	1.50574	0.086896	F
CSbapl.35110	0.135338	0	0	F
CSbapl.35113	0.125	0.130252	0.0115827	F
CSbapl.32324	0.435484	0.974104	0.0643374	F
CSbapl.32323	0.747788	0.273653	0.0228822	F
CSbapl.32322	0.555556	4.05996	0.153377	F
CSbapl.35117	0.102041	0	0	F
CSbapl.32320	0.78125	0.515048	0.0393005	F
CSbapl.35119	0.0932203	0.231105	0.019668	F
CSbapl.78372	0.166667	0.0633002	0.00580618	F
CSbapl.32329	0.436893	0.324536	0.0265879	F
CSbapl.32328	0.181818	0.270616	0.0226564	F
CSbapl.73586	0.0615385	0	0	F
CSbapl.98644	0.121951	0.285611	0.0237663	F
CSbapl.78371	0.116667	0	0	F
CSbapl.93805	0.138889	0.284482	0.0236831	F
CSbapl.87035	0.270294	0	0	F
CSbapl.79399	0.648609	2802.38	0.750973	F
CSbapl.68077	0.2	0	0	F
CSbapl.79397	0.53012	1.599	0.090353	F
CSbapl.79395	0.961538	1.95993	0.102655	F
CSbapl.79394	0.709265	1.63023	0.091483	F
CSbapl.79391	0.792965	3.26977	0.137315	F
CSbapl.79390	0.0549451	0.798828	0.0555418	F
CSbapl.93180	0.09375	0.231983	0.0197355	F
CSbapl.54001	0.794562	9.70801	0.224291	F
CSbapl.54005	0.70273	0.398568	0.0317328	F
CSbapl.72947	0.366492	4.86101	0.16728	F
CSbapl.92935	0.710744	21.5862	0.294894	F
CSbapl.92936	0.724728	34.1497	0.336732	F
CSbapl.72949	0.75528	2.80682	0.126458	F
CSbapl.42312	0.762963	100.48	0.43703	F
CSbapl.75393	0.0833333	0	0	F
CSbapl.42317	0.869369	0.284016	0.0236488	F
CSbapl.69671	0.755814	0.64512	0.0470921	F
CSbapl.69673	0.48	0.0667534	0.0061129	F
CSbapl.69674	0.691781	0.915445	0.0614839	F
CSbapl.49383	0.546794	1.41274	0.0833185	F
CSbapl.49382	0.142157	0	0	F
CSbapl.34242	0.108696	0	0	F
CSbapl.65163	0.583235	0	0	F
CSbapl.34247	0.2	0.178953	0.0155734	F
CSbapl.74620	0.2	3.29786	0.137935	F
CSbapl.74622	0.0607477	0.123001	0.0109738	F
CSbapl.49380	0.125581	0	0	F
CSbapl.74625	0.2	0	0	F
CSbapl.74626	0.0714286	0.881513	0.0597931	F
CSbapl.74627	0.142857	13.2911	0.251596	F
CSbapl.41558	0.204156	196.322	0.499935	F
CSbapl.40979	0.634	0.194107	0.0167816	F
CSbapl.40978	0.627417	0.62329	0.0458285	F
CSbapl.40971	0.38055	0	0	F
CSbapl.89130	0.785795	0.220857	0.0188773	F
CSbapl.89135	0.0806452	0.193316	0.0167189	F
CSbapl.31149	0.214953	0	0	F
CSbapl.89139	0.681633	3.07658	0.132935	F
CSbapl.31140	0.254237	0	0	F
CSbapl.31141	0.166667	0	0	F
CSbapl.71482	0.756098	0.848738	0.0581307	F
CSbapl.95803	0.0798898	0	0	F
CSbapl.95805	0.107143	7.18166	0.198835	F
CSbapl.95807	0.1875	0.0425256	0.00393965	F
CSbapl.95806	0.166667	0	0	F
CSbapl.95809	0.0491803	0	0	F
CSbapl.84077	0.0875	0	0	F
CSbapl.30890	0.270492	2.80133	0.126321	F
CSbapl.30897	0.0666667	0.171362	0.0149623	F
CSbapl.30896	0.0947368	0.728355	0.0517611	F
CSbapl.20039	0.941176	0.312945	0.0257565	F
CSbapl.25008	0.0468227	0.144617	0.0127773	F
CSbapl.82364	0.885553	423.007	0.572294	F
CSbapl.76918	0.261538	0	0	F
CSbapl.54349	0.112903	0.349321	0.0283417	F
CSbapl.76917	0.681445	2.58594	0.120803	F
CSbapl.76912	0.606383	0	0	F
CSbapl.19878	0.0510204	0	0	F
CSbapl.15074	0.306604	1.78435	0.0968697	F
CSbapl.60469	0.170648	0	0	F
CSbapl.19870	0.118421	0.196013	0.0169324	F
CSbapl.19871	0.1	0	0	F
CSbapl.19872	0.0993789	0	0	F
CSbapl.19873	0.0833333	0.0409568	0.00379719	F
CSbapl.19875	0.151515	0	0	F
CSbapl.19876	0.133333	0.563189	0.0422596	F
CSbapl.15070	0.850515	114.6	0.449353	F
CSbapl.15071	0.751948	72.9157	0.407048	F
CSbapl.60464	0.683871	3.88213	0.149993	F
CSbapl.30234	0.692769	7.16221	0.19861	F
CSbapl.30233	0.849655	36.7894	0.343582	F
CSbapl.85309	0.2	0.0303274	0.00282627	F
CSbapl.85307	0.323204	0.119176	0.0106511	F
CSbapl.85304	0.820702	9.33545	0.220941	F
CSbapl.85301	0.0869565	1.23067	0.075896	F
CSbapl.51373	0.0980392	0	0	F
CSbapl.52939	0.0718954	0	0	F
CSbapl.19294	0.660952	17.9839	0.278457	F
CSbapl.19290	0.12069	0	0	F
CSbapl.19291	0.125	92.6021	0.429385	F
CSbapl.19292	0.0757576	3.3607	0.139308	F
CSbapl.15732	0.105263	0.695596	0.0499509	F
CSbapl.15730	0.108179	0	0	F
CSbapl.15737	0.136364	0	0	F
CSbapl.15736	0.782661	0.659406	0.04791	F
CSbapl.15735	0.107143	6.41481	0.189525	F
CSbapl.15734	0.111111	0	0	F
CSbapl.48544	0.0820896	0	0	F
CSbapl.48545	0.146766	5.31189	0.174291	F
CSbapl.48543	0.0551471	0	0	F
CSbapl.48540	0.0421687	0	0	F
CSbapl.48541	0.0963855	0.134041	0.0118992	F
CSbapl.66251	0.0947902	0.465544	0.0361578	F
CSbapl.12962	0.737288	2.81524	0.126667	F
CSbapl.19128	0.166667	0	0	F
CSbapl.19129	0.130435	0	0	F
CSbapl.19121	0.833333	6.34793	0.188668	F
CSbapl.19125	0.125	0.217599	0.0186245	F
CSbapl.1620	0.115385	0.426045	0.0335733	F
CSbapl.1623	0.166667	0.517249	0.0394378	F
CSbapl.1624	0.106667	3.1184	0.1339	F
CSbapl.1626	0.1	1.15123	0.0724657	F
CSbapl.34086	0.777487	1.3455	0.0806447	F
CSbapl.72111	0.916667	2.2604	0.111801	F
CSbapl.72113	0.707317	69.6169	0.402729	F
CSbapl.9452	0.196579	0	0	F
CSbapl.72116	0.142857	0	0	F
CSbapl.72117	0.850877	4.41967	0.159874	F
CSbapl.72118	0.812137	7.62113	0.203784	F
CSbapl.72119	0.1	1.37636	0.0818811	F
CSbapl.61800	0.1	0.0678347	0.00620875	F
CSbapl.9458	0.843834	0.621592	0.0457294	F
CSbapl.65985	0.0917431	0.441	0.0345602	F
CSbapl.87568	0.859043	17.0599	0.273737	F
CSbapl.65989	0.0841121	0	0	F
CSbapl.14062	0.117647	0	0	F
CSbapl.97519	0.172662	4.74608	0.165406	F
CSbapl.58059	0.709172	2.40535	0.115915	F
CSbapl.58058	0.829431	20.206	0.288929	F
CSbapl.58055	0.537074	0.145697	0.0128665	F
CSbapl.97513	0.602837	0	0	F
CSbapl.58056	0.12987	8.64893	0.214439	F
CSbapl.97515	0.242647	4.22661	0.156443	F
CSbapl.97514	0.142857	0	0	F
CSbapl.58053	0.0902256	0	0	F
CSbapl.23282	0.770073	1.28466	0.0781586	F
CSbapl.36308	0.07173	0	0	F
CSbapl.39179	0.125	0.347615	0.028222	F
CSbapl.96649	0.271327	0	0	F
CSbapl.39173	0.828571	0	0	F
CSbapl.39172	0.679487	0.680405	0.0490996	F
CSbapl.96640	0.0659341	0	0	F
CSbapl.39170	0.697755	0.156416	0.0137475	F
CSbapl.36305	0.0616438	0.0230576	0.00215644	F
CSbapl.36304	0.101852	0	0	F
CSbapl.96644	0.282258	0.733725	0.0520546	F
CSbapl.33150	0.103448	0	0	F
CSbapl.782	0.716049	0.522957	0.039793	F
CSbapl.783	0.733465	7.03389	0.197111	F
CSbapl.781	0.0652174	18.4835	0.280915	F
CSbapl.787	0.830757	5.69997	0.179935	F
CSbapl.785	0.728205	14.1554	0.257151	F
CSbapl.789	0.788973	15.0173	0.262384	F
CSbapl.91917	0.731439	21.5421	0.294709	F
CSbapl.91916	0.123077	0.266296	0.0223342	F
CSbapl.91912	0.130435	0.0444432	0.00411349	F
CSbapl.22484	0.142857	0.0379075	0.00351967	F
CSbapl.22483	0.0833333	0.15257	0.0134323	F
CSbapl.91919	0.236196	15.7244	0.26647	F
CSbapl.22480	0.153846	0	0	F
CSbapl.67857	0.0625	0	0	F
CSbapl.7504	0.135135	0.109528	0.00983198	F
CSbapl.7503	0.15	0.809442	0.0560983	F
CSbapl.67859	0.125	0.349773	0.0283733	F
CSbapl.17609	0.0958904	0	0	F
CSbapl.17607	0.09375	0.0595876	0.0054753	F
CSbapl.24885	0.272727	0	0	F
CSbapl.24887	0.696	0.301398	0.0249208	F
CSbapl.24886	0.141256	1.28331	0.0781023	F
CSbapl.24881	0.0666667	0.0133759	0.00125694	F
CSbapl.24880	0.685611	0.344919	0.0280326	F
CSbapl.29871	0.102564	0.252207	0.0212758	F
CSbapl.13775	0.0882353	0	0	F
CSbapl.98397	0.2	0.568325	0.0425698	F
CSbapl.24889	0.0583942	0	0	F
CSbapl.13770	0.0909091	0.0844166	0.00766642	F
CSbapl.13772	0.0958904	0	0	F
CSbapl.22734	0.338462	0.192392	0.0166456	F
CSbapl.22736	0.231398	1.49071	0.086327	F
CSbapl.22733	0.203252	0	0	F
CSbapl.22732	0.534653	2.3736	0.115029	F
CSbapl.101109	0.458333	1.00543	0.0658268	F
CSbapl.101107	0.105263	0	0	F
CSbapl.38220	0.0952381	1.99855	0.103881	F
CSbapl.24776	0.125	5.20141	0.17262	F
CSbapl.38223	0.117647	2.83623	0.127186	F
CSbapl.35653	0.0445545	1.30116	0.078839	F
CSbapl.35650	0.070922	0	0	F
CSbapl.61180	0.510569	23.9253	0.304216	F
CSbapl.35656	0.121212	0	0	F
CSbapl.35657	0.128205	0	0	F
CSbapl.94730	0.0963855	0	0	F
CSbapl.94731	0.166667	0.452218	0.0352937	F
CSbapl.80215	0.0675676	0.268938	0.0225313	F
CSbapl.80212	0.0555556	0	0	F
CSbapl.94735	0.117021	18.0375	0.278725	F
CSbapl.80211	0.0952381	0	0	F
CSbapl.94739	0.785093	19.7906	0.287057	F
CSbapl.80219	0.0391134	0.794509	0.0553144	F
CSbapl.72754	0.696679	7.13084	0.198245	F
CSbapl.11609	0.759909	23.5597	0.302818	F
CSbapl.60858	0.614891	6.26615	0.187609	F
CSbapl.60859	0.12069	0	0	F
CSbapl.11603	0.125	0.276558	0.0230977	F
CSbapl.60857	0.787912	5.78547	0.181135	F
CSbapl.11607	0.0760234	1.78471	0.0968818	F
CSbapl.60853	0.1	0	0	F
CSbapl.11604	0.0952381	0	0	F
CSbapl.3973	0.863813	7.76979	0.205402	F
CSbapl.10955	0.635742	24.7852	0.307424	F
CSbapl.3971	0.0645161	0	0	F
CSbapl.3977	0.764368	0	0	F
CSbapl.10951	0.711712	4.59302	0.162852	F
CSbapl.10953	0.729947	15.7125	0.266403	F
CSbapl.61727	0.120968	1.98953	0.103596	F
CSbapl.61726	0.122905	0	0	F
CSbapl.61725	0.0387324	0.0641139	0.00587854	F
CSbapl.3978	0.778993	0.186918	0.0162103	F
CSbapl.61722	0.0619048	0	0	F
CSbapl.61721	0.603512	0	0	F
CSbapl.61720	0.0625	0.0879626	0.00797524	F
CSbapl.93420	0.837137	29.139	0.322184	F
CSbapl.93423	0.803901	3.51587	0.142616	F
CSbapl.93422	0.68172	8.81483	0.216052	F
CSbapl.93426	0.118644	0.683882	0.0492951	F
CSbapl.93429	0.2	0	0	F
CSbapl.69533	0.933333	0.887262	0.0600817	F
CSbapl.69530	0.181818	0.0180678	0.00169392	F
CSbapl.69531	0.745098	3.15191	0.134667	F
CSbapl.69536	0.4	0.0683882	0.00625776	F
CSbapl.69537	0.774194	0	0	F
CSbapl.69534	0.275862	0.167897	0.014682	F
CSbapl.65121	0.775744	2.10127	0.107067	F
CSbapl.28087	0.0542373	0.500612	0.0383948	F
CSbapl.81165	0.107383	23.5093	0.302624	F
CSbapl.20250	0.166667	0	0	F
CSbapl.65123	0.542373	13.0789	0.250181	F
CSbapl.81160	0.330855	27.5532	0.317071	F
CSbapl.81169	0.188679	0	0	F
CSbapl.21285	0.845556	22.2675	0.297705	F
CSbapl.99908	0.848726	0.522764	0.039781	F
CSbapl.90735	0.105263	0	0	F
CSbapl.90736	0.0761905	0	0	F
CSbapl.90737	0.738956	18.7647	0.282271	F
CSbapl.90738	0.0949721	0.0281042	0.00262193	F
CSbapl.90739	0.869565	0.0783247	0.0071335	F
CSbapl.21612	0.15625	0	0	F
CSbapl.21611	0.0775194	1.70622	0.0941773	F
CSbapl.21610	0.166667	0	0	F
CSbapl.93281	0.583333	1.99126	0.10365	F
CSbapl.21616	0.300557	0	0	F
CSbapl.21615	0.0752688	0	0	F
CSbapl.93282	0.666667	2.80867	0.126504	F
CSbapl.21618	0.4	0	0	F
CSbapl.92772	0.103286	0.0168902	0.00158444	F
CSbapl.92776	0.815789	0.921096	0.0617626	F
CSbapl.92777	0.0859375	14.0041	0.256202	F
CSbapl.92774	0.746141	0.273695	0.0228853	F
CSbapl.92775	0.735314	0.289888	0.0240804	F
CSbapl.92778	0.481444	1.3355	0.0802405	F
CSbapl.67078	0.843243	0.174877	0.0152457	F
CSbapl.90883	0.115385	0	0	F
CSbapl.90886	0.791045	18.8254	0.282561	F
CSbapl.90887	0.878531	0.301416	0.0249221	F
CSbapl.63762	0.125	0	0	F
CSbapl.6257	0.0952381	0.0555839	0.00511719	F
CSbapl.90889	0.1	0.0616725	0.00566126	F
CSbapl.63768	0.0600601	0.03342	0.00310978	F
CSbapl.53022	0.422156	28.2568	0.319373	F
CSbapl.53024	0.0648148	0	0	F
CSbapl.53029	0.0619469	9.77217	0.224856	F
CSbapl.92488	0.770428	7.57945	0.203326	F
CSbapl.57910	0.663283	22.909	0.300278	F
CSbapl.57912	0.782609	9.0043	0.21786	F
CSbapl.92484	0.732057	104.879	0.441044	F
CSbapl.92485	0.699396	54.5892	0.380093	F
CSbapl.92486	0.832941	20.0907	0.288413	F
CSbapl.92487	0.112782	0.993504	0.0652626	F
CSbapl.25912	0.0970874	0.0484949	0.00447975	F
CSbapl.25919	0.74	7.5021	0.202469	F
CSbapl.29020	0.804645	3.29805	0.137939	F
CSbapl.29023	0.135135	0	0	F
CSbapl.29024	0.506579	1.59453	0.0901903	F
CSbapl.29027	0.888889	6.86319	0.195079	F
CSbapl.86306	0.157895	6.89688	0.195484	F
CSbapl.29029	0.90625	5.58643	0.178318	F
CSbapl.86303	0.156682	0.502072	0.0384868	F
CSbapl.27518	0.2	0.176573	0.0153822	F
CSbapl.27516	0.0810811	0.434286	0.0341183	F
CSbapl.27512	0.12	0.963242	0.0638155	F
CSbapl.44663	0.0301291	0	0	F
CSbapl.44662	0.2	0	0	F
CSbapl.44661	0.0233051	0	0	F
CSbapl.44660	0.0364188	0	0	F
CSbapl.44667	0.0485437	0	0	F
CSbapl.44666	0.0314319	0	0	F
CSbapl.44665	0.111111	0	0	F
CSbapl.44669	0.026616	0	0	F
CSbapl.44668	0.023085	0	0	F
CSbapl.54244	0.09375	6.06824	0.184997	F
CSbapl.45399	0.0813953	0	0	F
CSbapl.54247	0.1	0	0	F
CSbapl.99707	0.114286	0	0	F
CSbapl.54242	0.114035	0	0	F
CSbapl.54243	0.142857	0	0	F
CSbapl.45390	0.657197	24.9184	0.307912	F
CSbapl.99708	0.0784884	0.779562	0.0545231	F
CSbapl.45393	0.142857	0.0386641	0.00358861	F
CSbapl.54248	0.0239521	0	0	F
CSbapl.54249	0.0512821	0	0	F
CSbapl.45396	0.0266393	0	0	F
CSbapl.42629	0.153846	5.71503	0.180147	F
CSbapl.42621	0.659658	9.92749	0.22621	F
CSbapl.42624	0.109756	0	0	F
CSbapl.42626	0.083871	0	0	F
CSbapl.5469	0.906542	20.4315	0.28993	F
CSbapl.5468	0.815476	0.49645	0.038132	F
CSbapl.5463	0.395722	6.16447	0.186276	F
CSbapl.5461	0.902542	40.9482	0.353459	F
CSbapl.5460	0.111111	5.29728	0.174071	F
CSbapl.5467	0.516264	42.3535	0.356576	F
CSbapl.82533	0.799743	12.6966	0.247577	F
CSbapl.51542	0.693	17.6599	0.276829	F
CSbapl.51545	0.702306	1.0759	0.0690939	F
CSbapl.54794	0.125	0	0	F
CSbapl.66847	0.25641	0.772579	0.0541512	F
CSbapl.66843	0.735683	6.50621	0.190684	F
CSbapl.66841	0.133333	6.09175	0.185311	F
CSbapl.66840	0.102041	14.8999	0.261687	F
CSbapl.57263	0.697479	3.10288	0.133543	F
CSbapl.52089	0.0649351	0	0	F
CSbapl.57267	0.0789474	0.0229837	0.0021496	F
CSbapl.57266	0.0808081	1.06507	0.0685988	F
CSbapl.57265	0.124031	0.0552545	0.00508766	F
CSbapl.57264	0.789902	7.34375	0.200691	F
CSbapl.57268	0.0824176	0.0513115	0.00473353	F
CSbapl.52085	0.114286	0	0	F
CSbapl.56799	0.552326	0.0825814	0.00750619	F
CSbapl.28868	0.434524	0.836622	0.0575087	F
CSbapl.28867	0.392157	0.0231424	0.00216428	F
CSbapl.28866	0.315068	0.0813902	0.00740205	F
CSbapl.28865	1	0.416363	0.0329288	F
CSbapl.56794	0.493075	0.460862	0.0358551	F
CSbapl.28861	0.0669746	3.17484	0.135188	F
CSbapl.28553	0.0821918	0	0	F
CSbapl.81947	0.650655	1.24817	0.0766352	F
CSbapl.45539	0.508503	6.51127	0.190748	F
CSbapl.81478	0.0557377	42.5133	0.356924	F
CSbapl.45534	0.0769231	0	0	F
CSbapl.45535	0.0601093	0	0	F
CSbapl.45536	0.0383973	0	0	F
CSbapl.45537	0.0384615	0.0210345	0.00196918	F
CSbapl.81949	0.790368	5.37434	0.175222	F
CSbapl.31300	0.643326	21.1582	0.293084	F
CSbapl.31301	0.111111	0	0	F
CSbapl.31304	0.0909091	0.671796	0.0486137	F
CSbapl.31307	0.217391	2.34759	0.114297	F
CSbapl.13822	0.09	0	0	F
CSbapl.2168	0.113671	0	0	F
CSbapl.81473	0.814992	38.6192	0.348055	F
CSbapl.2161	0.12069	0.546306	0.0412323	F
CSbapl.2160	0.08	0.550579	0.0414933	F
CSbapl.84279	0.236193	0.736578	0.0522102	F
CSbapl.28558	0.567308	1.56872	0.0892444	F
CSbapl.40507	0.446781	1.01255	0.0661618	F
CSbapl.84271	0.136364	0	0	F
CSbapl.55688	0.11236	0.990137	0.0651026	F
CSbapl.81476	0.155556	0.266356	0.0223387	F
CSbapl.56139	0.0980392	0	0	F
CSbapl.56136	0.0890411	0	0	F
CSbapl.55535	0.166667	0	0	F
CSbapl.53560	0.148148	0.200433	0.0172814	F
CSbapl.53561	0.0530303	0.29655	0.0245678	F
CSbapl.53569	0.1	0	0	F
CSbapl.2781	0.0955882	0	0	F
CSbapl.2784	0.216216	0.0498023	0.00459764	F
CSbapl.84899	0.12	0.934845	0.0624372	F
CSbapl.86125	0.0930233	9.44793	0.221965	F
CSbapl.54271	0.735736	39.2397	0.349526	F
CSbapl.89449	0.105263	6.27883	0.187774	F
CSbapl.89446	0.0863309	0	0	F
CSbapl.78984	0.133333	0.868609	0.0591421	F
CSbapl.78981	0.785455	11.2077	0.23669	F
CSbapl.78983	0.617958	11.6648	0.240168	F
CSbapl.78982	0.756684	2.01005	0.104243	F
CSbapl.48708	0.88616	16.4246	0.27035	F
CSbapl.3781	0.166667	0.35292	0.0285937	F
CSbapl.3783	0.100592	0.047783	0.0044155	F
CSbapl.3784	0.117647	0.230227	0.0196006	F
CSbapl.48700	0.723077	3.61583	0.144687	F
CSbapl.48701	0.773196	37.0999	0.344356	F
CSbapl.48702	0.719441	8.30815	0.211038	F
CSbapl.60046	0.0429799	2.35774	0.114583	F
CSbapl.48706	0.769337	4.18548	0.155695	F
CSbapl.47701	0.0909091	0.0923607	0.00835689	F
CSbapl.40571	0.333333	0.0925696	0.00837498	F
CSbapl.40570	0.648536	39.71	0.350625	F
CSbapl.47705	0.0909091	0	0	F
CSbapl.47704	0.142857	0	0	F
CSbapl.40575	0.116129	1.89982	0.100714	F
CSbapl.40574	0.76	2.1529	0.108629	F
CSbapl.41626	0.259615	0	0	F
CSbapl.41620	0.176471	0	0	F
CSbapl.41622	0.0854701	0	0	F
CSbapl.10149	0.209877	0.706743	0.0505708	F
CSbapl.72352	0.4	0.114378	0.0102446	F
CSbapl.72353	0.18018	1.33268	0.0801262	F
CSbapl.4789	0.15	0.292401	0.0242646	F
CSbapl.77187	0.0859375	0	0	F
CSbapl.77189	0.111111	0	0	F
CSbapl.72359	0.24359	1.28086	0.0780009	F
CSbapl.4781	0.0909091	0.203706	0.0175389	F
CSbapl.4783	0.125	1.48549	0.0861287	F
CSbapl.68915	0.190476	0	0	F
CSbapl.68913	0.182825	0.185989	0.0161363	F
CSbapl.68912	0.179487	25.6322	0.310482	F
CSbapl.68910	0.72	12.1535	0.243749	F
CSbapl.37070	0.111111	0.884559	0.0599461	F
CSbapl.37075	0.214286	0.192096	0.0166221	F
CSbapl.40399	0.0302475	0.483539	0.0373123	F
CSbapl.37078	0.737201	4.38175	0.15921	F
CSbapl.77457	0.0351562	0	0	F
CSbapl.4257	0.820225	1.85842	0.0993534	F
CSbapl.4256	0.625	0.271057	0.0226892	F
CSbapl.4255	0.789474	8.05915	0.208473	F
CSbapl.4254	0.608392	0.203873	0.0175521	F
CSbapl.4253	0.0964912	0	0	F
CSbapl.4252	0.155612	0	0	F
CSbapl.4250	0.062069	0.0440434	0.00407727	F
CSbapl.74197	0.0989011	72.1281	0.406034	F
CSbapl.74193	0.106383	3.35934	0.139279	F
CSbapl.33791	0.814406	11.3005	0.237407	F
CSbapl.33792	0.86166	3.74879	0.147373	F
CSbapl.33794	0.2	1.72198	0.0947266	F
CSbapl.74198	0.188889	0	0	F
CSbapl.70863	0.125	0	0	F
CSbapl.10144	0.142857	0	0	F
CSbapl.36671	0.650519	10.5125	0.231144	F
CSbapl.36670	0.673352	6.73811	0.193562	F
CSbapl.36672	0.106383	69.4095	0.402451	F
CSbapl.76871	0.0277778	0	0	F
CSbapl.6303	0.0869565	5.59308	0.178414	F
CSbapl.44949	0.19573	0.515717	0.0393422	F
CSbapl.71119	0.0833333	0	0	F
CSbapl.71118	0.157895	1.16616	0.07312	F
CSbapl.76328	0.183007	0	0	F
CSbapl.71111	0.0360825	0	0	F
CSbapl.71110	0.0514286	0	0	F
CSbapl.76325	0.16	0.0494388	0.00456488	F
CSbapl.76323	0.142857	0	0	F
CSbapl.71117	0.181818	0	0	F
CSbapl.70249	0.869159	0.97315	0.0642917	F
CSbapl.24578	0.0847458	0	0	F
CSbapl.70243	0.807624	8.50973	0.213064	F
CSbapl.70240	0.807443	6.31515	0.188245	F
CSbapl.24576	0.129032	0.226974	0.0193501	F
CSbapl.70244	0.746439	26.3676	0.313059	F
CSbapl.24572	0.582677	4.30902	0.157923	F
CSbapl.78470	0.2	0	0	F
CSbapl.64113	0.0638298	0.184122	0.0159872	F
CSbapl.64112	0.130435	2.05132	0.105531	F
CSbapl.64111	0.654038	142.697	0.469934	F
CSbapl.64110	0.206997	0	0	F
CSbapl.91965	0.733157	2.21764	0.110552	F
CSbapl.78247	0.58209	79.5565	0.415186	F
CSbapl.88188	0.718961	1.95104	0.10237	F
CSbapl.61217	0.0882353	1.89051	0.100409	F
CSbapl.35323	0.111111	0	0	F
CSbapl.35326	0.1	0	0	F
CSbapl.35327	0.2	0	0	F
CSbapl.35324	0.111111	0	0	F
CSbapl.35325	0.325301	0.0377047	0.00350119	F
CSbapl.75741	0.245399	0.0621472	0.00570354	F
CSbapl.35329	0.116279	0	0	F
CSbapl.87203	0.868439	2.48543	0.118114	F
CSbapl.87204	0.675439	32.9369	0.333411	F
CSbapl.87205	0.947368	0.6708	0.0485574	F
CSbapl.87206	0.671795	0.464675	0.0361017	F
CSbapl.87207	0.117647	0	0	F
CSbapl.87208	0.808623	83.3518	0.419541	F
CSbapl.87209	0.734043	2.0853	0.106579	F
CSbapl.88452	0.456954	1.30711	0.0790835	F
CSbapl.88454	0.309524	0	0	F
CSbapl.88459	0.0769231	0.146975	0.012972	F
CSbapl.69734	0.173913	0.58888	0.0438016	F
CSbapl.69735	0.0748663	0	0	F
CSbapl.69736	0.130435	0.304964	0.0251796	F
CSbapl.69737	0.162162	0.0799736	0.00727804	F
CSbapl.69730	1	3.60585	0.144482	F
CSbapl.69731	0.10989	0.781135	0.0546067	F
CSbapl.69733	0.0740741	0.0791405	0.00720504	F
CSbapl.67822	0.166667	0	0	F
CSbapl.69739	0.133333	0.740715	0.0524352	F
CSbapl.67823	0.142857	1.92695	0.101594	F
CSbapl.62617	0.4	0.0859236	0.00779779	F
CSbapl.65642	0.153846	0	0	F
CSbapl.65648	0.135135	2.15348	0.108646	F
CSbapl.62618	0.0930233	0	0	F
CSbapl.69882	0.0842105	4.88669	0.167693	F
CSbapl.69881	0.772727	13.4788	0.252831	F
CSbapl.69884	0.115385	7.46835	0.202093	F
CSbapl.11045	0.156716	0.915488	0.0614861	F
CSbapl.65393	0.115385	0	0	F
CSbapl.65391	0.111111	0	0	F
CSbapl.65394	0.409091	0.338062	0.027549	F
CSbapl.65395	0.786036	0	0	F
CSbapl.76741	0.527027	0.110109	0.00988149	F
CSbapl.67329	0.181034	0	0	F
CSbapl.30918	0.424883	0.619701	0.045619	F
CSbapl.30919	0.656219	0.28154	0.0234662	F
CSbapl.30917	0.723333	12.8056	0.248326	F
CSbapl.82396	0.166667	0	0	F
CSbapl.13958	0.0727273	0	0	F
CSbapl.13956	0.0952381	0	0	F
CSbapl.29802	0.107143	0.0384683	0.00357077	F
CSbapl.30158	0.681425	32.8064	0.333046	F
CSbapl.21356	0.162791	1.51387	0.0872024	F
CSbapl.20984	0.108696	0.751232	0.0530051	F
CSbapl.20985	0.900826	3.58033	0.143956	F
CSbapl.20987	0.2	2.51239	0.118843	F
CSbapl.19629	0.130435	0.592783	0.0440337	F
CSbapl.21055	0.125	0.573813	0.0429003	F
CSbapl.19620	0.0875912	1.51676	0.0873112	F
CSbapl.21057	0.116279	0.556932	0.0418801	F
CSbapl.19622	0.105882	1.211	0.0750583	F
CSbapl.19625	0.488844	0	0	F
CSbapl.19624	0.136364	0	0	F
CSbapl.19627	0.599251	13.5859	0.253527	F
CSbapl.21052	0.817308	0.260288	0.0218843	F
CSbapl.14459	0.177419	0.119646	0.0106907	F
CSbapl.14458	0.0989011	0.137293	0.0121701	F
CSbapl.13488	0.714286	7.18631	0.198889	F
CSbapl.9555	0.684867	4.21243	0.156186	F
CSbapl.14451	0.664706	0.554303	0.0417203	F
CSbapl.13482	0.175676	0.234595	0.0199359	F
CSbapl.64933	0.70098	3.92068	0.150737	F
CSbapl.9558	0.0769231	0	0	F
CSbapl.13487	0.5	0.753584	0.053132	F
CSbapl.13486	0.53125	0	0	F
CSbapl.13484	0.5	0.437266	0.0343147	F
CSbapl.15326	0.101737	0	0	F
CSbapl.38857	0.2	32.8476	0.333162	F
CSbapl.38855	0.30303	0.440951	0.0345569	F
CSbapl.22787	0.751515	3.12681	0.134093	F
CSbapl.38851	0.134715	0.193863	0.0167622	F
CSbapl.38850	0.166667	0.101546	0.00914901	F
CSbapl.27066	0.116667	1.68454	0.0934162	F
CSbapl.42428	0.112069	0.0887502	0.00804371	F
CSbapl.97498	0.634921	19.2167	0.284409	F
CSbapl.27063	0.654267	8.22427	0.210181	F
CSbapl.27060	0.0810811	0	0	F
CSbapl.27061	0.807102	4.36552	0.158924	F
CSbapl.97490	0.210084	1.63258	0.0915674	F
CSbapl.27068	0.142857	1.48958	0.0862841	F
CSbapl.97493	0.222222	0	0	F
CSbapl.23981	0.12	0.179694	0.0156328	F
CSbapl.15508	0.507307	0.664693	0.0482109	F
CSbapl.23987	0.0701754	0	0	F
CSbapl.15504	0.660194	15.8659	0.267267	F
CSbapl.15502	0.731183	0.201106	0.0173344	F
CSbapl.15503	0.782946	28.4312	0.319935	F
CSbapl.59539	0.166667	0.0962937	0.00869687	F
CSbapl.59538	0.115385	0.26736	0.0224137	F
CSbapl.1789	0.0897436	0.0573805	0.00527805	F
CSbapl.59535	0.183206	0	0	F
CSbapl.1787	0.106667	0	0	F
CSbapl.1785	0.0523256	0	0	F
CSbapl.1782	0.097561	12.3934	0.245459	F
CSbapl.42390	0.2	0	0	F
CSbapl.42393	0.12037	0	0	F
CSbapl.97729	0.133333	0	0	F
CSbapl.42395	0.142857	3.65087	0.145402	F
CSbapl.42396	0.0952381	0	0	F
CSbapl.15322	0.047619	0	0	F
CSbapl.97726	0.797297	4.18233	0.155638	F
CSbapl.97727	0.463415	1.81256	0.0978234	F
CSbapl.97724	0.192308	29.2442	0.322513	F
CSbapl.10366	0.166667	0.229824	0.0195696	F
CSbapl.10362	0.68232	0.166065	0.0145336	F
CSbapl.6067	0.630798	0.634807	0.0464972	F
CSbapl.18171	0.121212	0	0	F
CSbapl.18176	0.628176	22.9914	0.300603	F
CSbapl.18177	0.865031	6.11691	0.185646	F
CSbapl.18178	0.190083	2.91758	0.129171	F
CSbapl.18179	0.0810811	0.12254	0.010935	F
CSbapl.6069	0.74171	12.2852	0.244692	F
CSbapl.7337	0.0877193	0.148275	0.0130792	F
CSbapl.7332	0.677228	6.04899	0.184739	F
CSbapl.7338	0.130081	0.0503156	0.00464388	F
CSbapl.23364	0.0972222	2.30531	0.113095	F
CSbapl.23367	0.0963855	0	0	F
CSbapl.23361	0.103896	0	0	F
CSbapl.60136	0.0987654	3.96558	0.151596	F
CSbapl.60131	0.375887	2.54207	0.119639	F
CSbapl.60130	0.1	1.57239	0.0893794	F
CSbapl.60132	0.469309	2.58284	0.120722	F
CSbapl.620	0.808442	13.1279	0.25051	F
CSbapl.95380	0.677419	1.01969	0.0664971	F
CSbapl.622	0.113208	0.0428519	0.00396925	F
CSbapl.625	0.721311	1.68681	0.0934963	F
CSbapl.18285	0.0877193	0.359635	0.029062	F
CSbapl.627	0.125	1.75497	0.0958661	F
CSbapl.91898	0.1	2.09333	0.106825	F
CSbapl.91899	0.0679612	0.179199	0.0155931	F
CSbapl.91892	0.16129	4.9357	0.168477	F
CSbapl.56	0.884412	0.540979	0.0409058	F
CSbapl.91896	0.0538462	0.871934	0.0593103	F
CSbapl.91897	0.0945946	0.0748521	0.00682837	F
CSbapl.50	0.0784314	0.535807	0.0405878	F
CSbapl.26858	0.2	0	0	F
CSbapl.26859	0.166667	0	0	F
CSbapl.99986	0.166667	0.397461	0.0316579	F
CSbapl.26850	0.0608108	1.05123	0.0679627	F
CSbapl.26852	0.493724	0.316929	0.026043	F
CSbapl.99989	0.05	0	0	F
CSbapl.26857	0.0652174	0	0	F
CSbapl.83976	0.0935484	0.120915	0.0107979	F
CSbapl.95654	0.129032	0	0	F
CSbapl.91760	0.811346	43.5787	0.359213	F
CSbapl.91761	0.700647	5.28977	0.173958	F
CSbapl.33120	0.133333	2.78015	0.125793	F
CSbapl.91766	0.686957	0.338821	0.0276027	F
CSbapl.91767	0.729412	1749.98	0.706451	F
CSbapl.35905	0.695652	60.9873	0.390399	F
CSbapl.24725	0.107692	0	0	F
CSbapl.35902	0.78275	1.83535	0.0985868	F
CSbapl.18828	0.0568182	0.304952	0.0251788	F
CSbapl.18829	0.0546448	0	0	F
CSbapl.17839	0.136364	0.0799736	0.00727804	F
CSbapl.17836	0.2	0	0	F
CSbapl.17837	0.36087	0.180757	0.015718	F
CSbapl.17834	0.111111	30.8418	0.327383	F
CSbapl.18821	0.07	2.44877	0.117114	F
CSbapl.18822	0.0575	3.37874	0.139698	F
CSbapl.24726	0.181818	0	0	F
CSbapl.13108	0.51	0.14804	0.0130598	F
CSbapl.13109	0.177435	0.0523021	0.00482262	F
CSbapl.13107	0.352778	0.356239	0.0288255	F
CSbapl.98585	0.187675	0.117053	0.0104715	F
CSbapl.13103	0.17024	0.0945256	0.00854418	F
CSbapl.98581	0.402778	0	0	F
CSbapl.32651	0.0746269	0	0	F
CSbapl.46899	0.617021	12.3412	0.24509	F
CSbapl.100043	0.2	0.944111	0.0628892	F
CSbapl.100041	0.2	0.443525	0.0347257	F
CSbapl.46892	0.686347	36.533	0.342938	F
CSbapl.59722	0.766999	3.13218	0.134216	F
CSbapl.46890	0.649007	17.2869	0.274919	F
CSbapl.98635	0.121212	0.0983947	0.00887799	F
CSbapl.38074	0.627682	0.801523	0.0556834	F
CSbapl.38077	0.319277	0	0	F
CSbapl.38076	0.617978	1.68873	0.0935639	F
CSbapl.3542	0.0818182	0	0	F
CSbapl.80148	0.505747	1.56905	0.0892565	F
CSbapl.98632	0.0714286	1.3458	0.0806566	F
CSbapl.98639	0.111111	0.0725691	0.00662723	F
CSbapl.98638	0.147541	58.3898	0.38635	F
CSbapl.3548	0.640511	0.197911	0.0170824	F
CSbapl.3549	0.601054	14.0237	0.256325	F
CSbapl.80406	0.822107	1.72438	0.09481	F
CSbapl.80405	0.76431	0	0	F
CSbapl.80402	0.133621	0.920092	0.0617131	F
CSbapl.80401	0.139381	0.0666208	0.00610115	F
CSbapl.80408	0.116883	0	0	F
CSbapl.20045	0.0656934	0	0	F
CSbapl.25036	0.133333	0	0	F
CSbapl.25035	0.721485	0.745875	0.0527152	F
CSbapl.20046	0.0555556	0	0	F
CSbapl.25033	0.359606	66.8466	0.398943	F
CSbapl.25032	0.685217	8.93536	0.217206	F
CSbapl.20042	0.0576271	0.0436637	0.00404287	F
CSbapl.82312	0.0823529	0	0	F
CSbapl.86802	0.10101	2.62009	0.1217	F
CSbapl.51360	0.385281	0.223361	0.0190711	F
CSbapl.51361	0.136364	0	0	F
CSbapl.51363	0.133333	0.0549172	0.00505742	F
CSbapl.52949	0.0439883	0	0	F
CSbapl.51365	0.895954	4.54818	0.162091	F
CSbapl.66269	0.105263	0	0	F
CSbapl.51367	0.715517	5.30051	0.17412	F
CSbapl.51369	0.129032	0.135669	0.012035	F
CSbapl.66265	0.160133	1.02672	0.066826	F
CSbapl.66262	0.367742	0.646433	0.0471676	F
CSbapl.66260	0.387097	0.427219	0.0336511	F
CSbapl.47271	0.217742	0	0	F
CSbapl.47270	0.119048	1.13953	0.0719498	F
CSbapl.12271	0.3	0.145138	0.0128204	F
CSbapl.90964	0.0740741	0.500934	0.038415	F
CSbapl.90966	0.0928571	0.491024	0.0377884	F
CSbapl.90961	0.1	0.125578	0.0111907	F
CSbapl.90963	0.119048	0.104793	0.00942744	F
CSbapl.90962	0.111111	1.59658	0.090265	F
CSbapl.90969	0.0776256	2.73672	0.1247	F
CSbapl.4014	0.116279	0.615794	0.0453906	F
CSbapl.4011	0.102564	0	0	F
CSbapl.4010	0.114286	7.30045	0.200199	F
CSbapl.4013	0.0555556	0	0	F
CSbapl.54826	0.743038	0.622372	0.0457749	F
CSbapl.79188	0.264808	34.9347	0.338822	F
CSbapl.79100	0.921875	55.6389	0.381863	F
CSbapl.47855	0.137931	0.570025	0.0426723	F
CSbapl.47857	0.153846	2.53113	0.119347	F
CSbapl.47850	0.0978261	31.9816	0.33071	F
CSbapl.47853	0.106667	4.85793	0.16723	F
CSbapl.47852	0.107914	4.14706	0.154992	F
CSbapl.47858	0.0833333	2.01281	0.104329	F
CSbapl.28545	0.102941	228.478	0.514216	F
CSbapl.28547	0.107143	0	0	F
CSbapl.81466	0.111111	0	0	F
CSbapl.39846	0.123077	0.339904	0.0276791	F
CSbapl.39843	0.136364	0	0	F
CSbapl.33801	0.0892857	0.151669	0.0133584	F
CSbapl.33800	0.104478	0.203168	0.0174967	F
CSbapl.33803	0.080429	0.0855132	0.00776203	F
CSbapl.33807	0.429487	1.87625	0.0999416	F
CSbapl.26079	0.806026	3.89247	0.150193	F
CSbapl.33808	0.43309	0.754531	0.0531831	F
CSbapl.26072	0.479853	0.602807	0.0446272	F
CSbapl.26073	0.713359	0.439313	0.0344493	F
CSbapl.26070	0.859953	2.89024	0.128508	F
CSbapl.83197	0.325581	0	0	F
CSbapl.83190	0.0927835	0.4397	0.0344748	F
CSbapl.83191	0.105263	0.677162	0.0489169	F
CSbapl.92523	0.109375	0	0	F
CSbapl.92521	0.0764706	0.509588	0.0389589	F
CSbapl.60676	0.407895	2.68945	0.123496	F
CSbapl.99512	0.129032	0.391287	0.031239	F
CSbapl.99510	0.105263	0.10672	0.00959233	F
CSbapl.99518	0.103896	0	0	F
CSbapl.78277	0.725916	22.1227	0.297114	F
CSbapl.78276	0.167568	1.12001	0.0710827	F
CSbapl.78270	0.206522	0	0	F
CSbapl.4902	0.122807	0	0	F
CSbapl.4900	0.0735294	0	0	F
CSbapl.78279	0.0673077	0.764959	0.0537437	F
CSbapl.16508	0.0866142	0	0	F
CSbapl.94236	0.818301	1.35176	0.0808966	F
CSbapl.61288	0.111111	0	0	F
CSbapl.5057	0.0967742	0	0	F
CSbapl.5055	0.0872093	0	0	F
CSbapl.6502	0.0775194	0	0	F
CSbapl.42988	0.742138	0.264	0.0221625	F
CSbapl.42984	0.128205	0	0	F
CSbapl.27306	0.08	0.144714	0.0127854	F
CSbapl.27305	0.621053	2.59927	0.121154	F
CSbapl.27302	0.713287	4.01252	0.152486	F
CSbapl.72157	0.121951	2.47906	0.117941	F
CSbapl.87445	0.726496	4.12595	0.154603	F
CSbapl.87449	0.130435	0	0	F
CSbapl.12478	0.712821	2.41359	0.116144	F
CSbapl.88613	0.0431034	0	0	F
CSbapl.88611	0.0720721	1.05799	0.0682741	F
CSbapl.88615	0.080402	0.0830327	0.00754562	F
CSbapl.31299	0.904762	0.236959	0.0201168	F
CSbapl.85589	0.1	0	0	F
CSbapl.8021	0.802326	1.79706	0.0973005	F
CSbapl.87998	0.166667	0.24961	0.0210794	F
CSbapl.62956	0.105263	0.670153	0.0485207	F
CSbapl.52125	0.0833333	1.06087	0.0684066	F
CSbapl.31292	0.648438	0	0	F
CSbapl.52128	0.0740741	10.192	0.228473	F
CSbapl.87994	0.148515	0	0	F
CSbapl.77224	0.69697	2.05334	0.105594	F
CSbapl.84366	0.2	0	0	F
CSbapl.77227	0.110092	0	0	F
CSbapl.12472	0.823358	53.6028	0.3784	F
CSbapl.85597	0.101124	0	0	F
CSbapl.8023	0.720077	11.0333	0.235329	F
CSbapl.77238	0.0934579	0	0	F
CSbapl.77234	0.130435	0.1223	0.0109147	F
CSbapl.77235	0.117647	0.100629	0.00907023	F
CSbapl.41981	0.298507	3.08174	0.133054	F
CSbapl.41980	0.166667	0	0	F
CSbapl.41983	0.3	0	0	F
CSbapl.85599	0.0784314	0	0	F
CSbapl.60329	0.746137	2.6698	0.12299	F
CSbapl.2084	0.458333	1.69872	0.0939145	F
CSbapl.2087	0.125	0	0	F
CSbapl.2081	0.925926	0.276114	0.0230648	F
CSbapl.36955	0.433824	0.171262	0.0149542	F
CSbapl.2089	0.111111	0	0	F
CSbapl.23439	0.191781	0	0	F
CSbapl.31518	0.0880829	0.558104	0.0419513	F
CSbapl.31512	0.117647	0.785873	0.0548581	F
CSbapl.60323	0.579741	19.7881	0.287046	F
CSbapl.2338	0.121951	0	0	F
CSbapl.2336	0.128205	0.127902	0.0113857	F
CSbapl.55476	0.0824742	0	0	F
CSbapl.55477	0.0895522	0	0	F
CSbapl.2332	0.191388	16.7286	0.271986	F
CSbapl.55471	0.1125	0.458117	0.0356772	F
CSbapl.55472	0.694981	23.5098	0.302626	F
CSbapl.43169	0.195426	0	0	F
CSbapl.43165	0.722222	0.0962352	0.00869182	F
CSbapl.43167	0.0784314	1.32852	0.0799572	F
CSbapl.43161	0.142857	0	0	F
CSbapl.43160	0.2	0	0	F
CSbapl.100900	0.762048	0	0	F
CSbapl.43162	0.2	0.317887	0.0261118	F
CSbapl.37916	0.0708661	0.278755	0.0232604	F
CSbapl.37915	0.0714286	1.2854	0.0781891	F
CSbapl.37914	0.111111	0.161907	0.0141956	F
CSbapl.37913	0.384496	0.23099	0.0196592	F
CSbapl.37912	0.2	0.208642	0.017926	F
CSbapl.37911	0.116279	0	0	F
CSbapl.37919	0.111111	0.407048	0.0323046	F
CSbapl.37918	0.181818	0.711331	0.0508247	F
CSbapl.76546	0.525735	4.32722	0.158246	F
CSbapl.76543	0.0614035	0.94822	0.0630889	F
CSbapl.66539	0.114286	0	0	F
CSbapl.43298	0.0806452	0	0	F
CSbapl.43293	0.806387	0.302466	0.0249984	F
CSbapl.46660	0.575139	1.10119	0.0702393	F
CSbapl.46663	0.779661	7.63402	0.203926	F
CSbapl.46665	0.0958084	0.104762	0.00942479	F
CSbapl.46666	0.16	5.27098	0.173675	F
CSbapl.47131	0.0789474	0.396167	0.0315702	F
CSbapl.14617	0.112782	0.0878323	0.00796391	F
CSbapl.47137	0.242525	0.0853651	0.00774912	F
CSbapl.49860	0.105263	0	0	F
CSbapl.16812	0.103448	0.63087	0.0462692	F
CSbapl.15237	0.684989	0.274099	0.0229154	F
CSbapl.30649	0.523904	1.89451	0.10054	F
CSbapl.16816	0.728754	3.94665	0.151235	F
CSbapl.3069	0.82011	0	0	F
CSbapl.16815	0.0669856	0	0	F
CSbapl.66392	0.743421	0.345341	0.0280622	F
CSbapl.3064	0.0955414	0.216133	0.0185106	F
CSbapl.3067	0.669127	41.922	0.35563	F
CSbapl.66534	0.62766	0.81609	0.0564452	F
CSbapl.3061	0.0777027	0	0	F
CSbapl.69563	0.0681818	0	0	F
CSbapl.3063	0.0295359	0	0	F
CSbapl.22216	0.843373	4.27855	0.157378	F
CSbapl.75169	0.708241	0.114421	0.0102483	F
CSbapl.75164	0.814461	4.81514	0.166536	F
CSbapl.75166	0.426761	0.304188	0.0251234	F
CSbapl.4538	0.726994	7.85641	0.206331	F
CSbapl.43839	0.0482234	0.0469331	0.00433873	F
CSbapl.62489	0.578947	1.80991	0.0977341	F
CSbapl.48118	0.632979	11.5825	0.239551	F
CSbapl.48115	0.138889	1.24293	0.0764148	F
CSbapl.7033	0.1	0.0748532	0.00682847	F
CSbapl.101144	0.488636	0.0143688	0.00134958	F
CSbapl.49243	0.0694444	0	0	F
CSbapl.49240	0.0833333	0	0	F
CSbapl.49241	0.75165	2.163	0.108931	F
CSbapl.49246	0.446982	0.122406	0.0109236	F
CSbapl.49247	0.172131	0.328531	0.0268728	F
CSbapl.49245	0.666667	137.3	0.466314	F
CSbapl.41475	0.0512821	0	0	F
CSbapl.62483	0.545455	28.9795	0.321682	F
CSbapl.68898	0.133333	5.977	0.183768	F
CSbapl.41471	0.100917	0.14897	0.0131365	F
CSbapl.65862	0.0513834	0	0	F
CSbapl.65863	0.0860215	2.95537	0.130079	F
CSbapl.68890	0.811586	8.77174	0.215635	F
CSbapl.65869	0.2	0.0957434	0.00864938	F
CSbapl.68894	0.618962	18.7702	0.282297	F
CSbapl.68895	0.718734	1.1381	0.0718867	F
CSbapl.96031	0.175676	0	0	F
CSbapl.96030	0.2	0.0938626	0.00848686	F
CSbapl.96033	0.0384615	0.112555	0.0100898	F
CSbapl.33345	0.121212	0	0	F
CSbapl.62487	0.412162	0	0	F
CSbapl.28290	0.0677966	0.878386	0.0596358	F
CSbapl.58976	0.835938	3.95043	0.151307	F
CSbapl.58975	0.142857	0	0	F
CSbapl.71094	0.0464466	0	0	F
CSbapl.71095	0.138889	0.249098	0.0210406	F
CSbapl.75260	0.748011	4.24188	0.156719	F
CSbapl.71090	0.708603	7.65401	0.204145	F
CSbapl.71092	0.34375	0.860136	0.0587122	F
CSbapl.68762	0.71139	16.3027	0.269685	F
CSbapl.23163	0.2	0	0	F
CSbapl.68766	0.710638	205.009	0.50401	F
CSbapl.23160	0.142857	0.438061	0.034367	F
CSbapl.68768	0.0673759	41.0472	0.353682	F
CSbapl.79662	0.134454	0.104069	0.00936542	F
CSbapl.23168	0.122137	0	0	F
CSbapl.36345	0.155556	0.154264	0.0135713	F
CSbapl.72678	0.746083	0.357032	0.0288807	F
CSbapl.72671	0.102857	0	0	F
CSbapl.72673	0.117647	7.49407	0.20238	F
CSbapl.72674	0.0916667	0	0	F
CSbapl.36340	0.0597015	0	0	F
CSbapl.36343	0.157895	0.359277	0.0290371	F
CSbapl.71322	0.0636943	0	0	F
CSbapl.71320	0.123077	0.710152	0.0507596	F
CSbapl.71327	0.115385	0.127394	0.0113431	F
CSbapl.71325	0.142857	0.285561	0.0237625	F
CSbapl.36734	0.0947368	1.11326	0.0707811	F
CSbapl.8810	0.0882353	10.239	0.22887	F
CSbapl.8813	0.172757	4.8403	0.166945	F
CSbapl.8815	0.748571	19.5535	0.285972	F
CSbapl.74782	0.105263	0	0	F
CSbapl.8816	0.1	7.0789	0.197639	F
CSbapl.74789	0.607407	4.62895	0.163458	F
CSbapl.74788	0.820652	10.9817	0.234922	F
CSbapl.32435	0.0816327	0	0	F
CSbapl.32434	0.0869565	0	0	F
CSbapl.32433	0.142857	0.316134	0.0259859	F
CSbapl.32432	0.192593	0.239775	0.0203319	F
CSbapl.32431	0.192593	0.807957	0.0560207	F
CSbapl.35426	0.12	0.389881	0.0311434	F
CSbapl.35429	0.114943	0.0829361	0.00753719	F
CSbapl.35428	0.114943	0	0	F
CSbapl.91569	0.166667	11.8519	0.241555	F
CSbapl.32439	0.2	0	0	F
CSbapl.97815	0.176471	0.0307591	0.00286589	F
CSbapl.36880	0.686869	27.9548	0.318392	F
CSbapl.36886	0.944444	0.181423	0.0157713	F
CSbapl.73788	0.2	0	0	F
CSbapl.73789	0.142857	0.146182	0.0129066	F
CSbapl.35523	0.148148	0	0	F
CSbapl.64099	0.12093	0	0	F
CSbapl.73782	0.0575758	0	0	F
CSbapl.64097	0.129032	2.00208	0.103992	F
CSbapl.64094	0.778785	1.35095	0.0808641	F
CSbapl.64092	0.819742	60.9184	0.390294	F
CSbapl.64093	0.16	0	0	F
CSbapl.64090	0.235294	0	0	F
CSbapl.64091	0.227273	0	0	F
CSbapl.60682	0.546835	0.331601	0.0270911	F
CSbapl.23159	0.106383	0	0	F
CSbapl.95711	0.137931	0	0	F
CSbapl.95716	0.109091	0.372071	0.0299234	F
CSbapl.24306	0.808926	538.823	0.595138	F
CSbapl.24307	0.655716	0	0	F
CSbapl.24304	0.792632	8.2707	0.210656	F
CSbapl.24302	0.1	0.167308	0.0146343	F
CSbapl.24300	0.80117	30.4123	0.326098	F
CSbapl.61577	0.819565	13.701	0.254271	F
CSbapl.61572	0.619699	4.6719	0.164177	F
CSbapl.35283	0.136364	0	0	F
CSbapl.73257	0.716237	16.7492	0.272096	F
CSbapl.73258	0.0769231	0	0	F
CSbapl.73259	0.0353535	0	0	F
CSbapl.35289	0.152174	0	0	F
CSbapl.61578	0.809322	22.9318	0.300368	F
CSbapl.69382	0.25	45.1055	0.362398	F
CSbapl.69385	0.0892857	0.627316	0.0460628	F
CSbapl.50656	0.1	0	0	F
CSbapl.34489	0.102041	0.378622	0.0303739	F
CSbapl.34480	0.0877193	2.36976	0.114922	F
CSbapl.28782	0.564103	0.447717	0.0350001	F
CSbapl.34485	0.0925926	0.383505	0.0307084	F
CSbapl.69965	0.0711297	0.190975	0.0165331	F
CSbapl.69964	0.508135	0	0	F
CSbapl.94041	0.0892857	0	0	F
CSbapl.94047	0.0779221	0	0	F
CSbapl.69963	0.191532	0	0	F
CSbapl.69969	0.111111	0	0	F
CSbapl.69968	0.142857	0.403748	0.0320825	F
CSbapl.65055	0.0909091	0.236216	0.02006	F
CSbapl.62006	0.778058	0.950992	0.0632234	F
CSbapl.65057	0.197183	0	0	F
CSbapl.62003	0.786241	3.12434	0.134036	F
CSbapl.62002	0.744658	14.6346	0.260096	F
CSbapl.62001	0.601527	79.0416	0.41458	F
CSbapl.60711	0.0697674	0.0855627	0.00776635	F
CSbapl.51001	0.112676	0	0	F
CSbapl.15202	0.885449	23.7375	0.3035	F
CSbapl.15201	0.570632	1.95556	0.102515	F
CSbapl.51002	0.103448	0	0	F
CSbapl.15206	0.744607	2.04001	0.10518	F
CSbapl.20534	0.0810811	0	0	F
CSbapl.20536	0.08	0	0	F
CSbapl.26279	0.118644	2.71415	0.124127	F
CSbapl.26272	0.0869565	0.874367	0.0594331	F
CSbapl.66656	0.1	0	0	F
CSbapl.22978	0.0638298	0.432917	0.034028	F
CSbapl.22974	0.1	0.0443257	0.00410284	F
CSbapl.45749	0.0833333	0.202183	0.0174191	F
CSbapl.45748	0.107143	0	0	F
CSbapl.93906	0.117647	1.95896	0.102624	F
CSbapl.93907	0.117647	1.96644	0.102862	F
CSbapl.64504	0.639344	0.93495	0.0624424	F
CSbapl.64878	0.185185	0	0	F
CSbapl.14559	0.0810811	0.0909879	0.00823793	F
CSbapl.9981	0.221831	10.4842	0.230911	F
CSbapl.64876	0.0967742	0	0	F
CSbapl.64877	0.166667	0.31028	0.0255642	F
CSbapl.64872	0.2	0	0	F
CSbapl.50752	0.65725	6.8557	0.194989	F
CSbapl.50753	0.771593	5.12149	0.171393	F
CSbapl.50750	0.0841346	0.0731664	0.00667989	F
CSbapl.92058	0.149123	3.67003	0.145791	F
CSbapl.50756	0.703872	6.41405	0.189515	F
CSbapl.50757	0.725627	19.5966	0.286171	F
CSbapl.50754	0.205882	0	0	F
CSbapl.50755	0.784491	0	0	F
CSbapl.58565	0.105769	0.047124	0.00435599	F
CSbapl.97020	0.0606061	2.33637	0.113979	F
CSbapl.50758	0.727497	1.48537	0.086124	F
CSbapl.50759	0.738382	43.443	0.358924	F
CSbapl.97025	0.125	5.80706	0.181435	F
CSbapl.97024	0.125	1.23838	0.0762226	F
CSbapl.97027	0.0492958	0.0258187	0.0024114	F
CSbapl.97026	0.816489	5.73402	0.180415	F
CSbapl.3922	0.803571	823.656	0.635222	F
CSbapl.63068	0.82662	26.6584	0.314058	F
CSbapl.63066	0.15	0	0	F
CSbapl.5215	0.794382	45.9672	0.36415	F
CSbapl.5216	0.184211	13.2162	0.251099	F
CSbapl.3923	0.730924	18.6721	0.281826	F
CSbapl.63062	0.0625	0	0	F
CSbapl.63060	0.118644	0	0	F
CSbapl.14626	0.192308	0.15739	0.0138271	F
CSbapl.14627	0.16092	0	0	F
CSbapl.6749	0.0365854	0	0	F
CSbapl.6748	0.0321782	0.15511	0.0136406	F
CSbapl.47127	0.1	0	0	F
CSbapl.9742	0.737516	0	0	F
CSbapl.9740	0.49163	0.169031	0.0147739	F
CSbapl.47126	0.719697	7.27826	0.199945	F
CSbapl.13553	0.788462	0.0744299	0.0067912	F
CSbapl.58699	0.294118	1.02231	0.0666195	F
CSbapl.58698	0.153846	0	0	F
CSbapl.50121	0.768033	24.0871	0.304828	F
CSbapl.58690	0.08	0.28355	0.0236144	F
CSbapl.58695	0.322034	0.21681	0.0185632	F
CSbapl.58694	0.498969	1.89246	0.100473	F
CSbapl.99356	0.056962	0.777659	0.054422	F
CSbapl.6295	0.0810811	0.0516836	0.00476701	F
CSbapl.1246	0.581081	26.0638	0.312003	F
CSbapl.1244	0.552058	13.9839	0.256075	F
CSbapl.18325	0.56338	2.65524	0.122614	F
CSbapl.18324	0.787705	7.2035	0.199087	F
CSbapl.6299	0.111111	5.38781	0.175422	F
CSbapl.1248	0.768262	16.289	0.269611	F
CSbapl.42214	0.097561	0.201207	0.0173424	F
CSbapl.42216	0.103448	2.37037	0.114939	F
CSbapl.42210	0.37037	0.178633	0.0155477	F
CSbapl.82900	0.0446429	0	0	F
CSbapl.12893	0.142857	0.00574968	0.00054235	F
CSbapl.12891	0.1875	0	0	F
CSbapl.96370	0.166667	0.469812	0.0364329	F
CSbapl.96376	0.111111	0.946092	0.0629855	F
CSbapl.62822	0.047041	5.54736	0.177755	F
CSbapl.56343	0.645973	63.2427	0.39378	F
CSbapl.56341	0.0933333	1.00336	0.0657291	F
CSbapl.76022	0.311927	0	0	F
CSbapl.17119	0.107143	0	0	F
CSbapl.54851	0.166667	0	0	F
CSbapl.76026	0.0744681	1.14506	0.0721943	F
CSbapl.54858	0.138889	0.0437917	0.00405446	F
CSbapl.60445	0.86352	1.46911	0.0855031	F
CSbapl.7164	0.0957447	14.9987	0.262274	F
CSbapl.7165	0.791771	56.1797	0.382762	F
CSbapl.7167	0.744755	4.54146	0.161976	F
CSbapl.7161	0.791349	5.52775	0.177472	F
CSbapl.7162	0.799076	3.31471	0.138305	F
CSbapl.7163	0.114286	1.4156	0.0834302	F
CSbapl.7168	0.572568	21.581	0.294872	F
CSbapl.7169	0.0977778	0.760147	0.0534854	F
CSbapl.28360	0.243902	0	0	F
CSbapl.28361	0.0986842	0	0	F
CSbapl.28362	0.133333	0.051925	0.00478872	F
CSbapl.28363	0.876543	0.429159	0.0337796	F
CSbapl.28365	0.6	0.0339174	0.0031553	F
CSbapl.10669	0.173913	2.07798	0.106354	F
CSbapl.2536	0.111111	0.958906	0.0636064	F
CSbapl.2530	0.111111	0.765365	0.0537654	F
CSbapl.99822	0.788462	6.52106	0.190871	F
CSbapl.39261	0.0576923	0	0	F
CSbapl.89818	0.121212	0	0	F
CSbapl.16791	0.136986	0	0	F
CSbapl.89813	0.0759494	0	0	F
CSbapl.89810	0.386447	0	0	F
CSbapl.89816	0.130435	0	0	F
CSbapl.89814	0.084507	1.24362	0.0764436	F
CSbapl.1306	0.737391	2.42767	0.116533	F
CSbapl.9587	0.750444	1.78628	0.0969351	F
CSbapl.24411	0.666667	0.0886513	0.00803511	F
CSbapl.84992	0.1	1.191	0.0741988	F
CSbapl.46460	0.142857	0.0917144	0.0083009	F
CSbapl.46466	0.422857	0.439437	0.0344575	F
CSbapl.46465	0.640845	0.718701	0.0512313	F
CSbapl.46464	0.614286	0.325342	0.0266454	F
CSbapl.47335	0.181818	0.189916	0.016449	F
CSbapl.47336	0.16	0	0	F
CSbapl.47337	0.0970874	0	0	F
CSbapl.40103	0.830703	1.28628	0.0782255	F
CSbapl.40100	0.814455	18.7789	0.282338	F
CSbapl.60441	0.127273	0.0849021	0.00770876	F
CSbapl.47339	0.0864865	0	0	F
CSbapl.40109	0.0625	0	0	F
CSbapl.61393	0.824818	0	0	F
CSbapl.44820	0.0914634	0.288878	0.0240063	F
CSbapl.90026	0.800477	0.0993136	0.0089571	F
CSbapl.44825	0.0909091	7.8953	0.206746	F
CSbapl.44827	0.109677	1.5041	0.0868341	F
CSbapl.44826	0.0282828	0	0	F
CSbapl.44828	0.256757	0	0	F
CSbapl.90028	0.812343	5.93788	0.183236	F
CSbapl.11898	0.739884	49.2829	0.370603	F
CSbapl.3660	0.113208	0	0	F
CSbapl.3667	0.117647	1.72738	0.0949141	F
CSbapl.61039	0.664187	5.90053	0.182725	F
CSbapl.61037	0.713666	5.79843	0.181315	F
CSbapl.13315	0.148148	0.502115	0.0384895	F
CSbapl.61034	0.0977444	0.305836	0.0252428	F
CSbapl.13313	0.107143	0	0	F
CSbapl.61032	0.10596	5.80699	0.181434	F
CSbapl.61030	0.647348	40.9336	0.353426	F
CSbapl.11221	0.0882353	0	0	F
CSbapl.11220	0.0545455	0	0	F
CSbapl.11229	0.142857	0.0878358	0.00796422	F
CSbapl.11228	0.108696	0.159101	0.0139669	F
CSbapl.82297	0.12	0	0	F
CSbapl.27918	0.12069	0	0	F
CSbapl.9159	0.663024	1.71998	0.094657	F
CSbapl.27913	0.0704225	0	0	F
CSbapl.27910	0.136364	1.41228	0.0833004	F
CSbapl.22105	0.105263	0	0	F
CSbapl.27916	0.0952381	0	0	F
CSbapl.25200	0.55516	6.38452	0.189138	F
CSbapl.25203	0.846988	5.67231	0.179544	F
CSbapl.41273	0.102041	0	0	F
CSbapl.76173	0.0851064	0	0	F
CSbapl.82128	0.4	0	0	F
CSbapl.76171	0.107143	0.104069	0.00936542	F
CSbapl.25208	0.272727	3.33079	0.138657	F
CSbapl.25209	0.106383	0	0	F
CSbapl.82122	0.133333	0.0803967	0.0073151	F
CSbapl.82123	0.146341	0	0	F
CSbapl.82120	0.12987	29.3917	0.322973	F
CSbapl.86639	0.2	0	0	F
CSbapl.86636	0.0725578	0	0	F
CSbapl.86637	0.0725578	0	0	F
CSbapl.86633	0.16	0	0	F
CSbapl.93590	0.775862	2.07767	0.106344	F
CSbapl.93592	0.708812	3.45944	0.141426	F
CSbapl.93599	0.376432	1.06657	0.0686676	F
CSbapl.93598	0.0909091	0.0889076	0.00805738	F
CSbapl.82846	0.125	0.678356	0.0489842	F
CSbapl.68560	0.12	0	0	F
CSbapl.68561	0.142857	1939.43	0.716169	F
CSbapl.68567	0.2	0	0	F
CSbapl.68565	0.6	0.741594	0.052483	F
CSbapl.44179	0.319865	1.48547	0.0861278	F
CSbapl.44178	0.774086	11.3204	0.237559	F
CSbapl.45888	0.20098	53.9012	0.378915	F
CSbapl.45889	0.0759494	0.13193	0.011723	F
CSbapl.45880	0.0778443	96.589	0.433331	F
CSbapl.45883	0.142857	0.425217	0.0335183	F
CSbapl.45884	0.531773	9.58269	0.223177	F
CSbapl.45886	0.0958904	3.90657	0.150465	F
CSbapl.45887	0.65625	18.9147	0.282986	F
CSbapl.93043	0.580851	3.2643	0.137193	F
CSbapl.93042	0.0738255	0.089246	0.00808678	F
CSbapl.93040	0.0963855	0.0624024	0.00572627	F
CSbapl.93047	0.105263	0.274608	0.0229531	F
CSbapl.93046	0.715493	102.169	0.438591	F
CSbapl.55937	0.097561	0	0	F
CSbapl.55936	0.0597015	2.54627	0.119751	F
CSbapl.55931	0.104478	0	0	F
CSbapl.5153	0.8	0.123138	0.0109853	F
CSbapl.37055	0.129032	0	0	F
CSbapl.70435	0.0930233	0	0	F
CSbapl.54085	0.136364	0	0	F
CSbapl.70439	0.101449	0	0	F
CSbapl.54088	0.139785	0.913561	0.0613908	F
CSbapl.83653	0.2	101.654	0.438118	F
CSbapl.83652	0.12	0.590618	0.043905	F
CSbapl.46954	0.823899	7.16682	0.198663	F
CSbapl.88967	0.133333	0	0	F
CSbapl.45228	0.503546	15.2797	0.263921	F
CSbapl.45225	0.587302	2.90576	0.128885	F
CSbapl.45220	0.666016	1.38441	0.0822009	F
CSbapl.45222	0.0714286	0	0	F
CSbapl.45223	0.836538	157.33	0.479108	F
CSbapl.53196	0.0720339	0	0	F
CSbapl.53191	0.125654	0	0	F
CSbapl.53193	0.0622951	0	0	F
CSbapl.53198	0.0792952	0	0	F
CSbapl.851	0.799815	5.46269	0.176524	F
CSbapl.92314	0.100629	0	0	F
CSbapl.92315	0.0882353	5.25216	0.173391	F
CSbapl.84568	0.593176	5.22729	0.173014	F
CSbapl.84561	0.738108	2.14308	0.108334	F
CSbapl.84564	0.115385	0	0	F
CSbapl.84566	0.128205	0	0	F
CSbapl.84567	0.0789474	0	0	F
CSbapl.53441	0.72	1.7135	0.0944314	F
CSbapl.53447	0.142857	0	0	F
CSbapl.53448	0.137931	0.5128	0.03916	F
CSbapl.57572	0.166667	0	0	F
CSbapl.57571	0.0882353	0	0	F
CSbapl.57577	0.142857	0	0	F
CSbapl.57574	0.176471	0	0	F
CSbapl.57578	0.125	1.455	0.0849609	F
CSbapl.92	0.119617	0.908	0.0611155	F
CSbapl.13347	0.0527638	0	0	F
CSbapl.84388	0.0780142	0.477871	0.0369502	F
CSbapl.84384	0.139535	0.28549	0.0237573	F
CSbapl.76999	0.166667	0.138767	0.0122926	F
CSbapl.73310	0.119048	2.83772	0.127223	F
CSbapl.73315	0.102941	1.52287	0.0875408	F
CSbapl.73317	0.444444	1.71727	0.0945627	F
CSbapl.52718	0.142857	0	0	F
CSbapl.68884	0.159091	2.80934	0.126521	F
CSbapl.52714	0.423256	1.86544	0.0995854	F
CSbapl.52715	0.2	0	0	F
CSbapl.52716	0.780457	3.47403	0.141735	F
CSbapl.52717	0.0933333	6.4214	0.189609	F
CSbapl.52710	0.781609	0	0	F
CSbapl.52711	0.28884	11.3685	0.237929	F
CSbapl.12603	0.68623	0.290681	0.0241386	F
CSbapl.56624	0.2	0.189556	0.0164203	F
CSbapl.56625	0.0909091	0	0	F
CSbapl.15049	0.792297	0.35309	0.0286056	F
CSbapl.15048	0.655405	8.30984	0.211055	F
CSbapl.15044	0.586957	2.16465	0.108981	F
CSbapl.46147	0.113821	28.0558	0.318721	F
CSbapl.15041	0.578947	0.112387	0.0100755	F
CSbapl.46141	0.578022	3.93488	0.151009	F
CSbapl.15043	0.815063	19.3319	0.284947	F
CSbapl.43311	0.849026	7.34041	0.200653	F
CSbapl.85386	0.650407	4.13043	0.154686	F
CSbapl.85383	0.503686	21.4494	0.294319	F
CSbapl.85382	0.1	0.181976	0.0158156	F
CSbapl.31495	0.818182	1.03699	0.0673038	F
CSbapl.2278	0.123077	0.0428519	0.00396925	F
CSbapl.74840	0.125	0.142351	0.0125899	F
CSbapl.2273	0.711443	63.3752	0.393975	F
CSbapl.2272	0.653103	0	0	F
CSbapl.2270	0.837017	31.3499	0.32888	F
CSbapl.2275	0.126866	0	0	F
CSbapl.99751	0.0903226	0.682717	0.0492297	F
CSbapl.19217	0.115385	0.219771	0.0187931	F
CSbapl.19212	0.145455	0	0	F
CSbapl.60574	0.613181	21.7956	0.295767	F
CSbapl.19218	0.117647	11.9086	0.241971	F
CSbapl.19219	0.501838	4.61033	0.163145	F
CSbapl.37898	0.270655	5.55514	0.177868	F
CSbapl.37899	0.261856	2.64354	0.122311	F
CSbapl.37892	0.116279	0.183793	0.0159609	F
CSbapl.37893	0.735484	19.8336	0.287253	F
CSbapl.37890	0.732116	2.0275	0.10479	F
CSbapl.37891	0.785361	194.981	0.499289	F
CSbapl.37895	0.788942	4.31259	0.157986	F
CSbapl.43213	0.108108	0.116111	0.0103916	F
CSbapl.27860	0.703145	0.839981	0.0576816	F
CSbapl.86967	0.2	0.109204	0.00980442	F
CSbapl.10993	0.782135	0.198285	0.017112	F
CSbapl.93469	0.0522088	0.150623	0.0132724	F
CSbapl.73862	0.0652174	0.035423	0.00329296	F
CSbapl.73861	0.0952381	0	0	F
CSbapl.21975	0.0793651	0.637079	0.0466286	F
CSbapl.48099	0.0331675	0	0	F
CSbapl.21970	0.176471	0.509493	0.038953	F
CSbapl.48097	0.132353	1.02779	0.0668756	F
CSbapl.48090	0.117647	0.0841965	0.00764722	F
CSbapl.21978	0.111111	4.62499	0.163391	F
CSbapl.37766	0.0980392	0.927235	0.0620644	F
CSbapl.10999	0.133333	0.0231278	0.00216293	F
CSbapl.37768	0.120253	0	0	F
CSbapl.14794	0.799759	3.92452	0.150811	F
CSbapl.40663	0.422	0.162183	0.0142181	F
CSbapl.15168	0.0404255	0.335397	0.0273605	F
CSbapl.72196	0.750733	5.23963	0.173201	F
CSbapl.72197	0.142857	0.148244	0.0130766	F
CSbapl.97222	0.126197	5.6786	0.179633	F
CSbapl.97220	0.478261	0	0	F
CSbapl.97227	0.166667	0.114799	0.0102803	F
CSbapl.97226	0.0888889	0	0	F
CSbapl.97224	0.142857	0.0394238	0.00365777	F
CSbapl.471	0.699074	0.158633	0.0139286	F
CSbapl.48328	0.113208	0	0	F
CSbapl.478	0.0947368	4.77218	0.165835	F
CSbapl.48323	0.5	1.43169	0.0840583	F
CSbapl.59902	0.105263	0.411946	0.0326334	F
CSbapl.48321	0.114943	0.0604877	0.00555564	F
[truncated: 30,281 more rows]

## Sheet: M_TTS2K_5mC_vs_gene_express
Gene	M_5mC_level	expr_count	expr_ratio	group
CSbapl.11333	0.597884	0.103673	0.0103756	M	expr_count：fpkm
CSbapl.11331	0.469697	3.97648	0.16879	M	expr_ratio：log10(fpkm+1)/max（log10(fpkm+1)）
CSbapl.11337	0.783186	0.381567	0.0339972	M
CSbapl.11336	0.53431	5.19387	0.191808	M
CSbapl.11334	0.863588	1.1278	0.0794225	M
CSbapl.95455	0.776699	1.41542	0.0927585	M
CSbapl.95453	0.773295	33.4601	0.372328	M
CSbapl.95450	0.0782123	0.143722	0.0141248	M
CSbapl.64814	0.106195	1.11278	0.0786777	M
CSbapl.64449	0.514706	0.700089	0.0558187	M
CSbapl.24060	0.877111	0.366107	0.0328135	M
CSbapl.24066	0.131579	0	0	M
CSbapl.24065	0.0854093	3.33145	0.154188	M
CSbapl.64442	0.0972222	0	0	M
CSbapl.67181	0.782796	0.0431628	0.00444475	M
CSbapl.67180	0.142857	0.305925	0.0280747	M
CSbapl.67182	0.166667	0.130316	0.0128847	M
CSbapl.67185	0.2	0.160973	0.0156995	M
CSbapl.67184	0.36	1.19805	0.0828392	M
CSbapl.20762	0.177419	0	0	M
CSbapl.63870	0.2	0.103105	0.0103215	M
CSbapl.63874	0.137868	0.376792	0.033633	M
CSbapl.63878	0.2	0	0	M
CSbapl.62694	0.238806	0.0459251	0.00472292	M
CSbapl.62695	0.28	0	0	M
CSbapl.90563	0.155709	0	0	M
CSbapl.62690	0.111111	0	0	M
CSbapl.44203	0.0887097	0	0	M
CSbapl.38639	0.2	0.272999	0.0253887	M
CSbapl.53604	0.525253	0.412039	0.0362919	M
CSbapl.18730	0.145833	0.032327	0.00334645	M
CSbapl.38631	0.192308	0	0	M
CSbapl.38630	0.365854	0.215643	0.0205395	M
CSbapl.38637	0.147303	0.0759665	0.00770144	M
CSbapl.21028	0.26	0.314311	0.0287479	M
CSbapl.93113	0.0789474	0.0416653	0.00429365	M
CSbapl.93114	0.102941	0	0	M
CSbapl.94321	0.12	0	0	M
CSbapl.93116	0.12069	1.93663	0.11331	M
CSbapl.69800	0.115385	0	0	M
CSbapl.69801	0.678899	20.8917	0.324607	M
CSbapl.69807	0.21286	0	0	M
CSbapl.69805	0.114286	0	0	M
CSbapl.65319	0.747853	3.59217	0.160336	M
CSbapl.65313	0.138889	1.26952	0.0862046	M
CSbapl.65315	0.0952381	0	0	M
CSbapl.63251	0.0909091	0	0	M
CSbapl.63259	0.877358	4.62068	0.181594	M
CSbapl.15360	0.75	7.62358	0.226617	M
CSbapl.15361	0.46944	0.705161	0.056132	M
CSbapl.15362	0.912879	0.0767811	0.00778105	M
CSbapl.15363	0.813665	4.33838	0.176174	M
CSbapl.16949	0.08	0	0	M
CSbapl.15365	0.453125	10.4957	0.256855	M
CSbapl.15366	0.601528	0.62369	0.0509824	M
CSbapl.16945	0.2	0.0833602	0.00842176	M
CSbapl.15369	0.774411	1.05486	0.0757538	M
CSbapl.16947	0.121212	0	0	M
CSbapl.53903	0.0628571	0.12448	0.0123401	M
CSbapl.26337	0.842491	8.18594	0.233262	M
CSbapl.8131	0.130435	0	0	M
CSbapl.57595	0.871287	2.67995	0.137043	M
CSbapl.45150	0.942308	3.55642	0.159514	M
CSbapl.45157	0.803828	17.0583	0.304359	M
CSbapl.66753	0.117647	0	0	M
CSbapl.45158	0.78777	1.04223	0.0751054	M
CSbapl.27440	0.1	0.103155	0.0103263	M
CSbapl.92242	0.0722433	0	0	M
CSbapl.92241	0.125	0	0	M
CSbapl.13619	0.798283	28.8563	0.357244	M
CSbapl.99011	0.1	0.0381825	0.00394138	M
CSbapl.99015	0.0728745	0.255218	0.0239091	M
CSbapl.99018	0.0909091	1.18598	0.0822603	M
CSbapl.99019	0.137592	0.461028	0.0398792	M
CSbapl.13403	0.764778	23.3503	0.335802	M
CSbapl.50656	0.0576923	0.148909	0.0146008	M
CSbapl.13401	0.786217	14.1244	0.28571	M
CSbapl.50654	0.0794224	0	0	M
CSbapl.13407	0.0857143	0	0	M
CSbapl.13406	0.109375	0	0	M
CSbapl.97148	0.105263	0	0	M
CSbapl.57606	0.936364	2.76497	0.139446	M
CSbapl.97146	0.113636	0.169305	0.0164517	M
CSbapl.97147	0.166667	0	0	M
CSbapl.97144	0.2	0	0	M
CSbapl.13408	0.0652174	0.0566999	0.00580093	M
CSbapl.97143	0.687075	2.88183	0.142661	M
CSbapl.50658	0.0909091	0	0	M
CSbapl.58407	0.0487805	0	0	M
CSbapl.5559	0.853933	1.25814	0.085676	M
CSbapl.58405	0.115942	0.117	0.0116381	M
CSbapl.5556	0.633028	4.40872	0.177551	M
CSbapl.58408	0.0487805	0	0	M
CSbapl.5552	0.125	0.067858	0.00690579	M
CSbapl.5550	0.104651	0.0996079	0.00998753	M
CSbapl.9669	0.0390625	0	0	M
CSbapl.22055	0.875792	19.4678	0.317533	M
CSbapl.50387	0.166667	0	0	M
CSbapl.50386	0.2	0.0652614	0.00664971	M
CSbapl.22050	0.815754	6.58496	0.213119	M
CSbapl.22052	0.602459	0.505171	0.0430101	M
CSbapl.67404	0.742543	0.131636	0.0130074	M
CSbapl.67405	0.123188	0.903118	0.0676848	M
CSbapl.7953	0.615287	0.230196	0.0217912	M
CSbapl.7952	0.788889	1.16615	0.0813014	M
CSbapl.7955	0.781219	62.4388	0.436518	M
CSbapl.67187	0.827586	6.35103	0.209824	M
CSbapl.7956	0.169935	2.30395	0.125707	M
CSbapl.7958	0.639125	5.52985	0.197364	M
CSbapl.67408	0.25	0.160388	0.0156465	M
CSbapl.76123	0.0833333	0.122993	0.012201	M
CSbapl.23901	0.66271	132.641	0.514888	M
CSbapl.23902	0.129944	10.0667	0.252854	M
CSbapl.23907	0.599206	16.5961	0.301632	M
CSbapl.6393	0.0902256	0.359194	0.0322799	M
CSbapl.6394	0.628931	8.40179	0.235705	M
CSbapl.18205	0.125	0.0954604	0.00959006	M
CSbapl.6396	0.393862	0.180158	0.0174235	M
CSbapl.6397	0.105263	0.0243267	0.00252813	M
CSbapl.6399	0.118741	0.667783	0.0538007	M
CSbapl.92938	0.869173	15.1716	0.292752	M
CSbapl.92939	0.739471	0.570842	0.047502	M
CSbapl.42311	0.127907	5.32513	0.194014	M
CSbapl.42310	0.109375	4.14203	0.172232	M
CSbapl.42313	0.146758	2.3047	0.12573	M
CSbapl.42312	0.818558	84.9891	0.468509	M
CSbapl.92930	0.682759	0.153088	0.0149827	M
CSbapl.42314	0.0629921	0	0	M
CSbapl.42317	0.835443	0.317404	0.0289951	M
CSbapl.92933	0.167464	0.265621	0.0247773	M
CSbapl.12758	0.075	2.35582	0.127345	M
CSbapl.12754	0.0534351	0.0710625	0.00722095	M
CSbapl.12752	0.0394089	0	0	M
CSbapl.12753	0.0594714	0	0	M
CSbapl.56552	0.813559	4.58979	0.181014	M
CSbapl.56553	0.0925926	0.0432137	0.00444988	M
CSbapl.56550	0.0782123	0.20475	0.0195927	M
CSbapl.96230	0.142857	0.0379173	0.00391451	M
CSbapl.98050	0.0769231	0	0	M
CSbapl.98055	0.166667	0.0325197	0.00336609	M
CSbapl.91299	0.115942	0.169367	0.0164573	M
CSbapl.43494	0.0673077	0.289948	0.0267798	M
CSbapl.10453	0.131579	0	0	M
CSbapl.10452	0.113208	0	0	M
CSbapl.98526	0.0859375	0.102199	0.0102351	M
CSbapl.88015	0.0833333	0	0	M
CSbapl.7044	0.906542	19.8611	0.319535	M
CSbapl.16129	0.0967742	0	0	M
CSbapl.91293	0.0967742	0	0	M
CSbapl.99908	0.86845	1.01782	0.0738405	M
CSbapl.99909	0.0909091	0.0524625	0.0053783	M
CSbapl.2678	0.121951	0.060622	0.00619062	M
CSbapl.99905	0.10084	0	0	M
CSbapl.2675	0.560484	2.13326	0.120127	M
CSbapl.99900	0.803218	0.199759	0.0191561	M
CSbapl.99903	0.816941	0.0819951	0.00828914	M
CSbapl.37417	0.136364	0.0991569	0.00994439	M
CSbapl.37415	0.136957	0.0357297	0.00369259	M
CSbapl.37411	0.0487805	0.0436807	0.00449697	M
CSbapl.80485	0.111111	0.782466	0.0607957	M
CSbapl.37418	0.479275	12.6032	0.274561	M
CSbapl.4631	0.916667	0.785584	0.0609795	M
CSbapl.4632	0.755134	69.7081	0.447929	M
CSbapl.4635	0.546125	6.73865	0.215229	M
CSbapl.4637	0.66242	22.4184	0.331698	M
CSbapl.4639	0.833333	0.911917	0.0681699	M
CSbapl.47557	0.0857143	0.0638181	0.0065071	M
CSbapl.80736	0.373984	0.306468	0.0281183	M
CSbapl.40262	0.786415	4.08489	0.171057	M
CSbapl.40261	0.730845	120.334	0.504727	M
CSbapl.40260	0.0406699	0.762574	0.0596152	M
CSbapl.81283	0.741573	6.02454	0.205045	M
CSbapl.81280	0.850644	4.06694	0.170685	M
CSbapl.44945	0.159574	0	0	M
CSbapl.81287	0.568849	12.387	0.272875	M
CSbapl.44940	0.052459	0	0	M
CSbapl.90300	0.171271	0	0	M
CSbapl.90302	0.0769231	0.231872	0.0219343	M
CSbapl.44948	0.606365	1.19516	0.0827008	M
CSbapl.44949	0.330882	0.618825	0.0506668	M
CSbapl.73951	0.488372	0.0263249	0.00273312	M
CSbapl.4099	0.181818	0	0	M
CSbapl.4097	0.166667	0	0	M
CSbapl.4096	0.151351	0.120672	0.0119834	M
CSbapl.4093	0.234192	0.0802718	0.00812148	M
CSbapl.55140	0.842795	1.73202	0.105713	M
CSbapl.55144	0.747573	1.0848	0.0772754	M
CSbapl.82394	0.0837696	0.169744	0.0164911	M
CSbapl.82396	0.109091	0.143625	0.014116	M
CSbapl.5945	0.223881	0.798241	0.0617225	M
CSbapl.5947	0.1	0	0	M
CSbapl.72863	0.0492308	0	0	M
CSbapl.86881	0.117647	0	0	M
CSbapl.27819	0.0685185	0	0	M
CSbapl.27818	0.0717489	0	0	M
CSbapl.27817	0.654788	0.427754	0.037456	M
CSbapl.27816	0.787037	18.3713	0.311741	M
CSbapl.27815	0.771114	0.115875	0.0115322	M
CSbapl.86889	0.1	0	0	M
CSbapl.27810	0.686154	0.274667	0.0255264	M
CSbapl.41135	0.65	2.42184	0.129394	M
CSbapl.41136	0.26506	15.2712	0.293398	M
CSbapl.25523	0.121951	0	0	M
CSbapl.41139	0.66946	0.132811	0.0131165	M
CSbapl.22006	0.0857143	0	0	M
CSbapl.86776	0.4	0	0	M
CSbapl.86774	0.866591	0	0	M
CSbapl.19243	0.166667	1.59394	0.100258	M
CSbapl.79188	0.344564	7.89605	0.229889	M
CSbapl.79184	0.0544218	2.25384	0.124099	M
CSbapl.79181	0.806354	0	0	M
CSbapl.38092	0.117647	10.5799	0.257623	M
CSbapl.35062	0.2	0	0	M
CSbapl.69808	0.0909091	0.25174	0.0236173	M
CSbapl.33888	0.765493	36.5691	0.381414	M
CSbapl.33883	0.139535	0.304998	0.0279999	M
CSbapl.33882	0.113475	0	0	M
CSbapl.33885	0.240506	0.133004	0.0131345	M
CSbapl.1779	0.0871795	0.14742	0.0144643	M
CSbapl.33886	0.271212	2.10273	0.119097	M
CSbapl.70377	0.0729927	0.442903	0.0385662	M
CSbapl.93117	0.118644	0.0652614	0.00664971	M
CSbapl.32380	0.125	0	0	M
CSbapl.70371	0.653061	11.5329	0.265941	M
CSbapl.94320	0.140351	0.119173	0.0118426	M
CSbapl.70378	0.194093	0.539105	0.0453552	M
CSbapl.78580	0.350109	0	0	M
CSbapl.78583	0.141791	0.129081	0.0127697	M
CSbapl.78585	0.589797	37.1297	0.382972	M
CSbapl.78584	0.105263	0.104689	0.0104725	M
CSbapl.78589	0.795349	3.4006	0.155854	M
CSbapl.53258	0.0915493	0	0	M
CSbapl.88035	0.1	0	0	M
CSbapl.88032	0.0833333	0	0	M
CSbapl.88030	0.0737705	0.336776	0.0305306	M
CSbapl.88031	0.0901639	0.0197115	0.00205315	M
CSbapl.53253	0.1	0.0200017	0.00208308	M
CSbapl.53250	0.112676	3.98318	0.168932	M
CSbapl.53251	0.366048	0	0	M
CSbapl.53256	0.0384615	0.215648	0.0205399	M
CSbapl.52770	0.149254	0.550782	0.0461501	M
CSbapl.85674	0.1	0.0404451	0.00417037	M
CSbapl.87910	0.130435	0.425501	0.0372899	M
CSbapl.87911	0.16129	0	0	M
CSbapl.87916	0.2	0.617549	0.0505839	M
CSbapl.87918	0.2	0	0	M
CSbapl.88699	0.628975	7.51422	0.225275	M
CSbapl.32820	0.1125	0	0	M
CSbapl.32824	0.111111	0	0	M
CSbapl.32825	0.146154	0	0	M
CSbapl.32829	0.123596	0.0687993	0.00699846	M
CSbapl.3971	0.0448276	0.0999456	0.0100198	M
CSbapl.89344	0.0972222	0.790264	0.0612549	M
CSbapl.89342	0.0774648	2.85914	0.142044	M
CSbapl.89340	0.097561	0	0	M
CSbapl.46761	0.111111	0.276782	0.0257008	M
CSbapl.88963	0.123596	0	0	M
CSbapl.73053	0.0985401	0	0	M
CSbapl.88966	0.09375	0.0787187	0.00797015	M
CSbapl.73051	0.0992908	0.0163414	0.00170495	M
CSbapl.88968	0.107692	0	0	M
CSbapl.85518	0.84116	2.99263	0.145621	M
CSbapl.85513	0.171633	0.212931	0.0203045	M
CSbapl.41904	0.166667	0.695962	0.0555631	M
CSbapl.41907	0.814286	8.8522	0.240627	M
CSbapl.41901	0.821315	6.1362	0.206704	M
CSbapl.41900	0.133333	0.818335	0.0628913	M
CSbapl.41903	0.835616	3.55156	0.159402	M
CSbapl.41909	0.0697674	3.03947	0.146848	M
CSbapl.70402	0.116279	0.109088	0.0108904	M
CSbapl.51123	0.0769231	1.0282	0.07438	M
CSbapl.54478	0.1	0.134233	0.0132485	M
CSbapl.15162	0.702736	2.86077	0.142088	M
CSbapl.15161	0.688679	34.7194	0.376103	M
CSbapl.15167	0.131621	0.0840093	0.00848476	M
CSbapl.43215	0.0855263	0.0323999	0.00335389	M
CSbapl.43214	0.0604027	0.199216	0.0191084	M
CSbapl.43219	0.0757576	0.0562671	0.00575784	M
CSbapl.79977	0.753191	2.56983	0.133848	M
CSbapl.79976	0.829218	1.19755	0.0828151	M
CSbapl.79974	0.703704	3.50224	0.158256	M
CSbapl.79970	0.1	2.61826	0.135265	M
CSbapl.19316	0.177778	0.066995	0.00682074	M
CSbapl.37997	0.681901	6.71585	0.214918	M
CSbapl.37996	0.0871795	0.030262	0.00313584	M
CSbapl.37995	0.0756303	0	0	M
CSbapl.37994	0.737421	3.69941	0.162764	M
CSbapl.37991	0.0694444	0	0	M
CSbapl.73944	0.146667	0	0	M
CSbapl.73946	0.121429	0.357061	0.0321147	M
CSbapl.243	0.816216	0.0746158	0.00756932	M
CSbapl.242	0.610725	11.1851	0.26298	M
CSbapl.240	0.879114	19.2244	0.316274	M
CSbapl.247	0.117647	0	0	M
CSbapl.246	0.0829535	0	0	M
CSbapl.72098	0.1875	0.0857732	0.00865578	M
CSbapl.40743	0.2	0	0	M
CSbapl.97308	0.148148	0	0	M
CSbapl.97309	0.0980392	0.0673439	0.00685514	M
CSbapl.14690	0.109091	0	0	M
CSbapl.14696	0.0792079	0.0566999	0.00580093	M
CSbapl.4425	0.719368	1.21472	0.0836338	M
CSbapl.97300	0.2	0.188279	0.0181447	M
CSbapl.97301	0.2	0.027449	0.00284826	M
CSbapl.14699	0.0730337	0	0	M
CSbapl.97307	0.121951	0	0	M
CSbapl.52267	0.360825	0	0	M
CSbapl.50056	0.2	0	0	M
CSbapl.95237	0.107143	0	0	M
CSbapl.95234	0.0980392	0	0	M
CSbapl.95235	0.1	0	0	M
CSbapl.95239	0.797595	21.4711	0.327354	M
CSbapl.64229	0.0847458	0.315192	0.0288184	M
CSbapl.9062	0.595311	0.110269	0.0110024	M
CSbapl.9061	0.640614	6.03381	0.205184	M
CSbapl.9064	0.0862069	0	0	M
CSbapl.14445	0.821114	0.863673	0.0654818	M
CSbapl.14340	0.15	0	0	M
CSbapl.14343	0.133333	1.4566	0.0945363	M
CSbapl.64222	0.489669	30.8636	0.364088	M
CSbapl.64225	0.157895	3.59067	0.160302	M
CSbapl.64224	0.0641026	0	0	M
CSbapl.64227	0.0833333	0.955869	0.0705606	M
CSbapl.14346	0.181818	0.0137707	0.00143857	M
CSbapl.60148	0.788043	2.39838	0.128671	M
CSbapl.74321	0.636364	0.689847	0.0551831	M
CSbapl.18446	0.228723	2.41962	0.129326	M
CSbapl.18447	0.111111	0.127086	0.0125836	M
CSbapl.18449	0.0304348	0.479156	0.0411763	M
CSbapl.75476	0.0789474	0	0	M
CSbapl.75472	0.108068	3.35031	0.154645	M
CSbapl.71549	0.0967742	0.283641	0.0262643	M
CSbapl.71543	0.104167	0	0	M
CSbapl.71540	0.883053	0.0853139	0.00861128	M
CSbapl.36118	0.125	0.456167	0.0395287	M
CSbapl.14440	0.850365	0	0	M
CSbapl.74328	0.55814	0.630088	0.0513961	M
CSbapl.36110	0.299373	0.38712	0.0344191	M
CSbapl.36113	0.105263	0.132366	0.0130752	M
CSbapl.36114	0.12	0	0	M
CSbapl.36116	0.166667	0	0	M
CSbapl.98218	0.695096	3.58184	0.160099	M
CSbapl.24924	0.153846	0	0	M
CSbapl.98212	0.166667	0.748856	0.0587934	M
CSbapl.98211	0.0701754	0.0783708	0.00793622	M
CSbapl.98217	0.215084	0.0910015	0.00916105	M
CSbapl.98216	0.107143	0	0	M
CSbapl.98215	0.770819	0.132552	0.0130925	M
CSbapl.98214	0.815789	9.85073	0.250781	M
CSbapl.45153	0.907631	11.5861	0.266387	M
CSbapl.66759	0.808338	1.04749	0.0753758	M
CSbapl.33697	0.5	0	0	M
CSbapl.33691	0.111111	0	0	M
CSbapl.38180	0.857143	1.1509	0.0805585	M
CSbapl.32127	0.125	0.0138552	0.00144733	M
CSbapl.91073	0.0947368	0.751574	0.0589568	M
CSbapl.32121	0.111111	4.05497	0.170436	M
CSbapl.91075	0.0952381	0	0	M
CSbapl.32129	0.0578035	0.879296	0.0663598	M
CSbapl.32128	0.0638298	0.0435076	0.00447952	M
CSbapl.611	0.771055	4.33388	0.176085	M
CSbapl.23654	0.614776	82.3177	0.46519	M
CSbapl.23657	0.0786885	0.0463451	0.00476514	M
CSbapl.23651	0.878179	0.874997	0.0661189	M
CSbapl.74707	0.0707547	0.931549	0.0692445	M
CSbapl.8892	0.0567823	1.59988	0.100499	M
CSbapl.8895	0.073913	0	0	M
CSbapl.42	0.106977	0	0	M
CSbapl.74700	0.176471	0.247559	0.0232653	M
CSbapl.18998	0.111111	0.0331552	0.00343081	M
CSbapl.18990	0.0736196	0.421199	0.036972	M
CSbapl.18991	0.0828025	0.128191	0.0126867	M
CSbapl.70635	0.181818	0.176904	0.017133	M
CSbapl.18993	0.11588	0.201945	0.0193475	M
CSbapl.18994	0.108434	0.434914	0.0379822	M
CSbapl.18995	0.105528	0.0700331	0.00711981	M
CSbapl.70631	0.859213	1.70631	0.104719	M
CSbapl.70630	0.135135	0.184118	0.0177758	M
CSbapl.69309	0.0833333	0.0644161	0.00656621	M
CSbapl.66173	0.109756	0	0	M
CSbapl.69303	0.819512	1.62256	0.101412	M
CSbapl.66177	0.0693642	0	0	M
CSbapl.66176	0.0487805	0.0682511	0.0069445	M
CSbapl.69307	0.0855856	5.32583	0.194025	M
CSbapl.37839	0.727955	14.8364	0.290549	M
CSbapl.12341	0.0666667	0.0187319	0.00195205	M
CSbapl.12347	0.754775	13.4004	0.280551	M
CSbapl.97891	0.850806	26.6089	0.349012	M
CSbapl.36808	0.0697674	0.0542982	0.0055616	M
CSbapl.97893	0.304714	2.48167	0.131217	M
CSbapl.97894	0.868613	0	0	M
CSbapl.97897	0.0909091	0.203229	0.0194598	M
CSbapl.36802	0.0631579	0.0514639	0.00527846	M
CSbapl.36803	0.166667	0	0	M
CSbapl.36806	0.0824176	0	0	M
CSbapl.36807	0.136364	0	0	M
CSbapl.36804	0.166667	0.736089	0.0580227	M
CSbapl.36805	0.129032	0.0852137	0.00860156	M
CSbapl.100173	0.0434783	0	0	M
CSbapl.100179	0.14	0	0	M
CSbapl.98624	0.507353	0.610921	0.050152	M
CSbapl.50876	0.358491	0	0	M
CSbapl.34402	0.879581	0.472525	0.0407037	M
CSbapl.50874	0.269231	0	0	M
CSbapl.34404	0.867769	4.68701	0.182828	M
CSbapl.28123	0.0909091	0.197879	0.0189911	M
CSbapl.34406	0.102362	0.453755	0.0393543	M
CSbapl.50870	0.540984	3039.35	0.843541	M
CSbapl.50879	0.983051	3.06435	0.147494	M
CSbapl.20352	0.0810811	0	0	M
CSbapl.95790	0.2	0.929276	0.0691206	M
CSbapl.95793	0.27381	209.848	0.56285	M
CSbapl.95795	0.543147	12.9039	0.27686	M
CSbapl.95794	0.142857	8.77347	0.239783	M
CSbapl.64764	0.0703125	0.0798362	0.00807905	M
CSbapl.64766	0.657895	0.0247413	0.0025707	M
CSbapl.28657	0.72973	0.217226	0.0206764	M
CSbapl.47961	0.0854701	1.17887	0.0819175	M
CSbapl.47963	0.853881	18.3626	0.311694	M
CSbapl.47965	0.857553	225.724	0.570486	M
CSbapl.47966	0.834016	38.7334	0.387305	M
CSbapl.47968	0.104478	0.251345	0.023584	M
CSbapl.62080	0.0879121	0.0248857	0.00258552	M
CSbapl.11104	0.147059	0	0	M
CSbapl.67225	0.800792	1.90352	0.112117	M
CSbapl.39759	0.582524	8.17764	0.233167	M
CSbapl.67227	0.178571	0	0	M
CSbapl.11102	0.142857	0	0	M
CSbapl.67223	0.125	0.120672	0.0119834	M
CSbapl.90459	0.15	160.954	0.5351	M
CSbapl.39757	0.0760234	0	0	M
CSbapl.67229	0.2	0.0592047	0.00604997	M
CSbapl.39755	0.179487	0.0530287	0.00543487	M
CSbapl.90671	0.118644	0.0844674	0.0085292	M
CSbapl.63939	0.12766	0.429985	0.0376203	M
CSbapl.9853	0.822556	5.25353	0.192816	M
CSbapl.61687	0.679516	39.8957	0.390338	M
CSbapl.9856	0.142857	0.109202	0.0109013	M
CSbapl.10854	0.111111	0	0	M
CSbapl.10857	0.205405	0.0287638	0.00298277	M
CSbapl.3831	0.112903	0	0	M
CSbapl.10859	0.124138	0.260503	0.0243511	M
CSbapl.9859	0.0385757	0	0	M
CSbapl.61688	0.552567	1.45255	0.0943631	M
CSbapl.61689	0.793779	6.40552	0.210601	M
CSbapl.62337	0.0543478	0.297212	0.0273705	M
CSbapl.62332	0.494253	3.91915	0.167571	M
CSbapl.66047	0.292	12.3116	0.272281	M
CSbapl.62338	0.571171	0.473706	0.040788	M
CSbapl.25725	0.798742	6.85635	0.216817	M
CSbapl.25721	0.665017	1.66434	0.103075	M
CSbapl.25720	0.783721	2.50974	0.132062	M
CSbapl.90452	0.632017	564.281	0.66658	M
CSbapl.25729	0.791928	19.079	0.315515	M
CSbapl.63683	0.101124	0	0	M
CSbapl.63680	0.543326	3.63089	0.161219	M
CSbapl.63684	0.0503513	1.03104	0.0745274	M
CSbapl.96857	0.291667	0.125404	0.0124266	M
CSbapl.96854	0.153846	0	0	M
CSbapl.96853	0.662791	0	0	M
CSbapl.96852	0.275862	0.9955	0.0726705	M
CSbapl.29659	0.1	0	0	M
CSbapl.29658	0.125	2.66089	0.136497	M
CSbapl.21403	0.378378	2.47263	0.130944	M
CSbapl.21400	0.781022	4.0042	0.169374	M
CSbapl.21401	0.7536	7.01337	0.218898	M
CSbapl.21407	0.610247	0	0	M
CSbapl.21405	0.0601504	5.2082	0.192051	M
CSbapl.26844	0.82516	38.8012	0.387484	M
CSbapl.83961	0.0930233	0	0	M
CSbapl.25899	0.879339	5.47257	0.196437	M
CSbapl.25898	0.284024	0.265379	0.0247572	M
CSbapl.25895	0.130435	0	0	M
CSbapl.25894	0.091954	0.0614249	0.00627021	M
CSbapl.80807	0.128049	0.383732	0.0341618	M
CSbapl.80805	0.723819	0	0	M
CSbapl.25892	0.0985915	0.673922	0.0541872	M
CSbapl.44430	0.081761	0.0582687	0.00595697	M
CSbapl.44431	0.103774	0.82555	0.0633078	M
CSbapl.46127	0.761255	3.58698	0.160217	M
CSbapl.83965	0.0982143	0	0	M
CSbapl.29387	0.060629	0	0	M
CSbapl.60795	0.5	0	0	M
CSbapl.60796	0.233716	0.113197	0.0112794	M
CSbapl.84531	0.137931	0.569859	0.0474362	M
CSbapl.60793	0.136213	0.202863	0.0194278	M
CSbapl.60792	0.844444	2.24853	0.123927	M
CSbapl.38409	0.787037	0	0	M
CSbapl.904	0.151515	12.2235	0.271583	M
CSbapl.59255	0.112245	0.246423	0.0231696	M
CSbapl.59256	0.0804598	0.0603344	0.00616209	M
CSbapl.907	0.747143	3.3419	0.154442	M
CSbapl.93327	0.1	0.109202	0.0109013	M
CSbapl.59252	0.805195	3.19912	0.150925	M
CSbapl.59253	0.636546	6.32902	0.209508	M
CSbapl.93328	0.878505	32.0549	0.367949	M
CSbapl.46121	0.723478	0.183673	0.0177362	M
CSbapl.59258	0.103704	2.46149	0.130606	M
CSbapl.59259	0.184211	0.48825	0.041821	M
CSbapl.31317	0.125	0.114428	0.0113957	M
CSbapl.5295	0.2	0	0	M
CSbapl.5296	0.0882353	1.68641	0.103943	M
CSbapl.53434	0.21327	0.0568216	0.00581305	M
CSbapl.8073	0.305349	46.5843	0.406271	M
CSbapl.8071	0.628736	19.3096	0.316717	M
CSbapl.8077	0.0580645	0.126589	0.0125373	M
CSbapl.8076	0.0673575	3.32813	0.154108	M
CSbapl.8074	0.64557	0.10233	0.0102476	M
CSbapl.60240	0.125	0	0	M
CSbapl.60246	0.896414	1.39825	0.0920077	M
CSbapl.6929	0.363158	0.121056	0.0120194	M
CSbapl.6928	0.266566	2.51171	0.132121	M
CSbapl.54568	0.0955056	8.92923	0.241446	M
CSbapl.37785	0.142857	0	0	M
CSbapl.6923	0.12	1.12064	0.079068	M
CSbapl.6922	0.106061	2.13564	0.120207	M
CSbapl.6920	0.72125	61.0642	0.434214	M
CSbapl.27769	0.142857	0.421098	0.0369645	M
CSbapl.27768	0.2	0	0	M
CSbapl.27764	0.2	0	0	M
CSbapl.27767	0.125	0.107606	0.0107498	M
CSbapl.27766	0.0909091	0.131601	0.0130041	M
CSbapl.27762	0.129032	0.203338	0.0194693	M
CSbapl.58612	0.0913242	893.901	0.7149	M
CSbapl.58611	0.107759	0	0	M
CSbapl.58617	0.261628	1.37866	0.0911452	M
CSbapl.58616	0.0857143	0.0704528	0.00716106	M
CSbapl.5748	0.12987	0.551461	0.0461962	M
CSbapl.5749	0.740109	0.406492	0.0358779	M
CSbapl.5746	0.0956522	0	0	M
CSbapl.5744	0.2	0	0	M
CSbapl.5745	0.1	0	0	M
CSbapl.5741	0.0882353	0.0910015	0.00916105	M
CSbapl.57602	0.0625	0.268315	0.0250009	M
CSbapl.13405	0.15	0	0	M
CSbapl.27499	0.102273	0	0	M
CSbapl.27492	0.119048	0.782642	0.0608061	M
CSbapl.27491	0.0705882	0	0	M
CSbapl.27490	0.08	0.273593	0.0254378	M
CSbapl.27497	0.142857	0.0587329	0.00600311	M
CSbapl.27496	0.109091	0.919868	0.0686065	M
CSbapl.42876	0.114286	0.103817	0.0103894	M
CSbapl.82983	0.0964912	0.0726082	0.00737264	M
CSbapl.82987	0.153846	0.0242068	0.00251583	M
CSbapl.82989	0.75	8.29908	0.23455	M
CSbapl.45479	0.85	4.49897	0.179291	M
CSbapl.45478	0.135071	0.0616959	0.00629707	M
CSbapl.83058	0.566243	5.30018	0.193598	M
CSbapl.45471	0.815927	38.9116	0.387776	M
CSbapl.45470	0.811125	200.235	0.557942	M
CSbapl.83057	0.873047	6.10712	0.206275	M
CSbapl.83056	0.782143	5.0336	0.18905	M
CSbapl.83051	0.128205	0	0	M
CSbapl.45477	0.0841584	0	0	M
CSbapl.83052	0.0952381	0	0	M
CSbapl.50020	0.0692641	0	0	M
CSbapl.50022	0.097561	0	0	M
CSbapl.50023	0.0666667	0.063543	0.00647989	M
CSbapl.57036	0.115385	0	0	M
CSbapl.57034	0.113636	0	0	M
CSbapl.50029	0.786577	11.962	0.269482	M
CSbapl.55760	0.230769	0	0	M
CSbapl.55762	0.95583	0	0	M
CSbapl.5558	0.979592	0.0292499	0.00303247	M
CSbapl.6219	0.0828729	0.0769602	0.00779855	M
CSbapl.6218	0.101562	0	0	M
CSbapl.6217	0.0306062	0.285328	0.0264025	M
CSbapl.6216	0.708029	8.49604	0.236754	M
CSbapl.6211	0.106383	0	0	M
CSbapl.42299	0.0753425	0.0898642	0.00905134	M
CSbapl.42294	0.807434	6.32315	0.209424	M
CSbapl.42296	0.656051	1.2277	0.0842486	M
CSbapl.42290	0.134615	1.42313	0.0930936	M
CSbapl.42292	0.101156	0.124093	0.012304	M
CSbapl.42293	0.757178	3.1571	0.149867	M
CSbapl.11935	0.125	0.752165	0.0589923	M
CSbapl.11934	0.649706	55.2902	0.423943	M
CSbapl.11937	0.179487	0.262604	0.0245262	M
CSbapl.11936	0.814063	105.336	0.490848	M
CSbapl.11932	0.873294	5.06471	0.189591	M
CSbapl.11938	0.622318	6.18011	0.207349	M
CSbapl.74108	0.166667	1.38125	0.0912596	M
CSbapl.17440	0.0178784	0.679017	0.0545068	M
CSbapl.17446	0.9	0.0850613	0.00858679	M
CSbapl.53647	0.802529	1.36071	0.0903487	M
CSbapl.53646	0.829049	12.8569	0.276504	M
CSbapl.98155	0.704055	3.11154	0.148708	M
CSbapl.35532	0.15625	0	0	M
CSbapl.66127	0.0571429	0	0	M
CSbapl.98151	0.0551724	0	0	M
CSbapl.98152	0.0446429	0	0	M
CSbapl.98153	0.0457516	0	0	M
CSbapl.42129	0.649351	1.73712	0.10591	M
CSbapl.42123	0.0559611	0	0	M
CSbapl.42124	0.144695	0.261278	0.0244157	M
CSbapl.42125	0.0483871	0.105713	0.0105699	M
CSbapl.101346	0.185185	0	0	M
CSbapl.101343	0.111111	0	0	M
CSbapl.101341	0.111111	0.551102	0.0461718	M
CSbapl.30776	0.142857	0	0	M
CSbapl.30772	0.190073	0	0	M
CSbapl.30770	0.793103	0.554324	0.0463901	M
CSbapl.30771	0.846011	0.741181	0.0583308	M
CSbapl.84911	0.166667	0.120977	0.012012	M
CSbapl.100437	0.0993789	0	0	M
CSbapl.43457	0.0666667	0.084724	0.00855408	M
CSbapl.43451	0.153846	0.00951235	0.000995811	M
CSbapl.43453	0.103448	0.14742	0.0144643	M
CSbapl.84916	0.190476	0.240437	0.0226632	M
CSbapl.3160	0.190476	0.133215	0.0131541	M
CSbapl.3193	0.741507	4.51986	0.17969	M
CSbapl.3194	0.765714	0.475311	0.0409025	M
CSbapl.51869	0.752122	0	0	M
CSbapl.51868	0.744631	2.84748	0.141726	M
CSbapl.3199	0.796875	51.4051	0.416421	M
CSbapl.3198	0.809955	93.4552	0.478387	M
CSbapl.51865	0.309061	0.313149	0.0286549	M
CSbapl.47519	0.0909091	0	0	M
CSbapl.85060	0.115385	0	0	M
CSbapl.47510	0.470752	10.5749	0.257577	M
CSbapl.47511	0.153846	0.0307482	0.00318547	M
CSbapl.47512	0.0880503	0.627205	0.0512099	M
CSbapl.85069	0.105263	0	0	M
CSbapl.56079	0.854255	2.82409	0.141084	M
CSbapl.56078	0.768332	2.92164	0.143734	M
CSbapl.56071	0.599819	0.555447	0.0464661	M
CSbapl.56070	0.855661	11.1425	0.262612	M
CSbapl.56073	0.746241	1.79927	0.108271	M
CSbapl.56072	0.87812	55.4494	0.42424	M
CSbapl.56075	0.7854	4.00194	0.169327	M
CSbapl.56077	0.738302	0.615493	0.0504501	M
CSbapl.43989	0.214612	0.187398	0.0180667	M
CSbapl.43981	0.726275	3.68904	0.162532	M
CSbapl.43980	0.126984	0	0	M
CSbapl.43987	0.111111	0	0	M
CSbapl.43986	0.108108	0	0	M
CSbapl.43985	0.136364	0	0	M
CSbapl.43984	0.0614035	0	0	M
CSbapl.16719	0.0851064	0	0	M
CSbapl.16715	0.107143	0	0	M
CSbapl.16716	0.33871	16.4382	0.300684	M
CSbapl.22056	0.826059	40.8044	0.392649	M
CSbapl.16713	0.741007	20.1112	0.320788	M
CSbapl.89891	0.146707	0	0	M
CSbapl.89897	0.825843	0.154284	0.0150917	M
CSbapl.89896	0.892421	4.4933	0.179183	M
CSbapl.89894	0.738928	28.2241	0.354993	M
CSbapl.89899	0.0329068	0.129264	0.0127867	M
CSbapl.52519	0.166667	0.233396	0.0220645	M
CSbapl.2822	0.584282	4.85631	0.185913	M
CSbapl.37207	0.0769231	0	0	M
CSbapl.37206	0.894309	111.07	0.496372	M
CSbapl.77629	0.114754	0.166856	0.0162312	M
CSbapl.40188	0.0755814	0	0	M
CSbapl.37200	0.0813397	0	0	M
CSbapl.77625	0.111111	0	0	M
CSbapl.77624	0.111111	0	0	M
CSbapl.40184	0.0724638	0	0	M
CSbapl.77621	0.0933333	0	0	M
CSbapl.40183	0.147513	0	0	M
CSbapl.40180	0.0961538	0.11003	0.0109797	M
CSbapl.77622	0.0909091	0.0508344	0.00521546	M
CSbapl.67403	0.139785	1.66883	0.103252	M
CSbapl.81367	0.122449	0.682645	0.0547339	M
CSbapl.81361	0.804365	2.13951	0.120337	M
CSbapl.81363	0.742905	0.1134	0.0112986	M
CSbapl.81362	0.354995	2.7211	0.138213	M
CSbapl.44297	0.555556	0	0	M
CSbapl.69021	0.057554	0	0	M
CSbapl.57850	0.0721649	0.312969	0.0286405	M
CSbapl.57852	0.0786517	0.0523175	0.00536381	M
CSbapl.49375	0.13943	3.0114	0.146114	M
CSbapl.49372	0.125	1.44886	0.0942046	M
CSbapl.49370	0.0630631	19.866	0.319559	M
CSbapl.76242	0.84434	2.41978	0.129331	M
CSbapl.41581	0.0857143	9.84756	0.250751	M
CSbapl.90538	0.266129	0	0	M
CSbapl.41582	0.103448	0.391107	0.034721	M
CSbapl.80757	0.0905172	0	0	M
CSbapl.45804	0.77896	1.39049	0.0916672	M
CSbapl.45807	0.183824	0.0542002	0.00555182	M
CSbapl.45808	0.0989011	0	0	M
CSbapl.30430	0.0978261	0	0	M
CSbapl.71708	0.097561	0.0763649	0.00774039	M
CSbapl.71701	0.0705882	0.309272	0.0283439	M
CSbapl.71703	0.0546624	0.482236	0.041395	M
CSbapl.71704	0.0635838	0.103994	0.0104062	M
CSbapl.71705	0.0355263	0.0997277	0.00999899	M
CSbapl.71706	0.0404531	0.212731	0.0202872	M
CSbapl.79579	0.7844	12.2562	0.271842	M
CSbapl.79578	0.842795	96.9955	0.482257	M
CSbapl.79573	0.751961	50.1276	0.413825	M
CSbapl.79572	0.279633	900.275	0.715647	M
CSbapl.79571	0.789937	3.50117	0.158231	M
CSbapl.79570	0.905237	0.268462	0.0250131	M
CSbapl.79577	0.834978	48.0476	0.409456	M
CSbapl.79575	0.78902	7.96056	0.230649	M
CSbapl.79574	0.739377	32.7513	0.370142	M
CSbapl.73636	0.446291	40.7536	0.392521	M
CSbapl.73637	0.763689	0	0	M
CSbapl.73635	0.765586	75.9115	0.456775	M
CSbapl.78620	0.0592885	11.3401	0.26431	M
CSbapl.73633	0.113636	0.212115	0.0202337	M
CSbapl.73630	0.543396	0.0627022	0.00639671	M
CSbapl.73631	0.048951	0	0	M
CSbapl.73881	0.106383	0.617336	0.05057	M
CSbapl.18203	0.125	0.0559683	0.00572808	M
CSbapl.70166	0.2	0	0	M
CSbapl.76284	0.073913	0.191621	0.0184401	M
CSbapl.76285	0.103896	0	0	M
CSbapl.76287	0.142857	2.07526	0.118162	M
CSbapl.76280	0.62069	10.5098	0.256984	M
CSbapl.76282	0.737679	0.508644	0.0432525	M
CSbapl.26544	0.134615	0	0	M
CSbapl.33456	0.583333	9.1866	0.244138	M
CSbapl.33457	0.901961	0.722044	0.0571683	M
CSbapl.33455	0.873239	8.08928	0.232149	M
CSbapl.33453	0.0833333	0	0	M
CSbapl.73581	0.212366	0.0883789	0.0089079	M
CSbapl.73582	0.119048	0.182279	0.0176123	M
CSbapl.33458	0.8575	7.45738	0.22457	M
CSbapl.35110	0.118881	0.885492	0.0667061	M
CSbapl.35113	0.133333	3.21252	0.15126	M
CSbapl.73583	0.346154	1.0261	0.0742711	M
CSbapl.32323	0.816901	0.0877589	0.00884797	M
CSbapl.35114	0.0869565	0.655613	0.0530304	M
CSbapl.35117	0.0735294	0.139075	0.0136966	M
CSbapl.35116	0.0769231	0.797645	0.0616876	M
CSbapl.35119	0.0803571	0	0	M
CSbapl.73584	0.899582	8.54347	0.237278	M
CSbapl.32329	0.177778	0.734563	0.0579302	M
CSbapl.35150	0.0666667	0.21688	0.0206464	M
CSbapl.78370	0.0869565	0	0	M
CSbapl.38004	0.0940171	0.320898	0.0292737	M
CSbapl.24279	0.0952381	0.110918	0.0110639	M
CSbapl.87035	0.149223	0.0231851	0.00241084	M
CSbapl.68074	0.125	0	0	M
CSbapl.79399	0.722093	16.1302	0.298809	M
CSbapl.68077	0.0833333	1.17855	0.081902	M
CSbapl.79397	0.441011	3.00015	0.145819	M
CSbapl.79395	0.87766	6.02865	0.205107	M
CSbapl.79394	0.633065	5.29123	0.193448	M
CSbapl.79391	0.863885	6.45186	0.211257	M
CSbapl.79390	0.0784314	217.324	0.566515	M
CSbapl.26548	0.0977011	0.1512	0.0148103	M
CSbapl.54001	0.760536	4.095	0.171266	M
CSbapl.54005	0.852286	0.20475	0.0195927	M
CSbapl.72947	0.389313	4.03322	0.169983	M
CSbapl.92935	0.727142	34.0241	0.374036	M
CSbapl.92936	0.706482	59.0608	0.430763	M
CSbapl.72949	0.800316	9.88477	0.251111	M
CSbapl.92937	0.796497	20.9861	0.325059	M
CSbapl.66203	0.0705882	0	0	M
CSbapl.75393	0.0659341	0	0	M
CSbapl.92932	0.0677966	0.0814473	0.00823588	M
CSbapl.69671	0.90625	0.700968	0.0558731	M
CSbapl.69673	0.54902	0	0	M
CSbapl.69674	0.792537	1.10086	0.0780826	M
CSbapl.69676	0.137931	0.0477086	0.00490212	M
CSbapl.75397	0.834452	0.121834	0.0120924	M
CSbapl.49382	0.278755	0.021066	0.00219277	M
CSbapl.34242	0.133333	0	0	M
CSbapl.74629	0.2	0.146641	0.0143929	M
CSbapl.65163	0.727204	0.488044	0.0418064	M
CSbapl.65162	0.142857	0.143578	0.0141116	M
CSbapl.34247	0.142857	0.0717639	0.00728981	M
CSbapl.74620	0.25	0.959462	0.0707536	M
CSbapl.74622	0.0524862	0.0813369	0.00822513	M
CSbapl.75394	0.779304	16.9795	0.303899	M
CSbapl.74624	0.166667	0	0	M
CSbapl.74626	0.0746269	0.20002	0.019179	M
CSbapl.71489	0.833966	104.416	0.489934	M
CSbapl.40979	0.62645	0.459827	0.0397927	M
CSbapl.40978	0.774528	1.3005	0.0876312	M
CSbapl.40971	0.386555	0.247045	0.023222	M
CSbapl.89130	0.832933	0	0	M
CSbapl.89135	0.1	1.63594	0.101948	M
CSbapl.31148	0.166667	0.0589679	0.00602645	M
CSbapl.31149	0.1	0.248047	0.0233065	M
CSbapl.89139	0.728669	3.09169	0.148199	M
CSbapl.25000	0.0400802	0	0	M
CSbapl.31140	0.128713	0	0	M
CSbapl.31141	0.117647	0.117936	0.0117262	M
CSbapl.41553	0.0960452	0.452969	0.0392974	M
CSbapl.71481	0.623529	0.607115	0.0499032	M
CSbapl.95803	0.0875	0	0	M
CSbapl.95805	0.0769231	2.27827	0.124886	M
CSbapl.95804	0.115942	0.0276585	0.0028697	M
CSbapl.95807	0.111111	0.102549	0.0102684	M
CSbapl.95806	0.2	0.298403	0.027467	M
CSbapl.95809	0.0479233	0	0	M
CSbapl.84077	0.0757576	0	0	M
CSbapl.30890	0.111607	1.20155	0.0830065	M
CSbapl.30897	0.0580645	0.0453293	0.00466298	M
CSbapl.20039	1	0.275326	0.0255807	M
CSbapl.82362	0.873239	50.4848	0.414557	M
CSbapl.76918	0.135135	0.0133381	0.00139367	M
CSbapl.54349	0.0970874	0.0777424	0.00787491	M
CSbapl.76917	0.772271	0.938254	0.0696089	M
CSbapl.76912	0.616438	0	0	M
CSbapl.19878	0.034965	0	0	M
CSbapl.43345	0.825672	2.19194	0.122079	M
CSbapl.10149	0.121339	0.76636	0.0598409	M
CSbapl.19870	0.13253	0	0	M
CSbapl.19871	0.0777778	0.084724	0.00855408	M
CSbapl.19872	0.031746	0.168582	0.0163866	M
CSbapl.19873	0.142857	0.119207	0.0118458	M
CSbapl.19874	0.166667	0	0	M
CSbapl.19875	0.0952381	0	0	M
CSbapl.19876	0.315789	0.140292	0.0138089	M
CSbapl.15070	0.79387	87.967	0.47209	M
CSbapl.60464	0.795494	13.9074	0.28419	M
CSbapl.30234	0.703641	23.9592	0.3384	M
CSbapl.30233	0.900705	21.9292	0.329477	M
CSbapl.85307	0.227891	1.74381	0.106166	M
CSbapl.85304	0.815925	13.1383	0.278618	M
CSbapl.85301	0.0963855	0.102489	0.0102628	M
CSbapl.51373	0.0902778	0	0	M
CSbapl.51372	0.107143	0	0	M
CSbapl.24539	0.44086	0.206953	0.0197848	M
CSbapl.19294	0.716495	63.8707	0.438866	M
CSbapl.19290	0.10274	0.965377	0.0710706	M
CSbapl.19291	0.128	56.3587	0.425921	M
CSbapl.19292	0.0823529	0.66738	0.0537753	M
CSbapl.15732	0.0731707	0.0898095	0.00904606	M
CSbapl.15730	0.11597	0.187315	0.0180594	M
CSbapl.15737	0.242424	0	0	M
CSbapl.15736	0.830331	0.569956	0.0474426	M
CSbapl.15735	0.097561	0.947929	0.0701327	M
CSbapl.15734	0.0898876	0	0	M
CSbapl.48544	0.101695	0	0	M
CSbapl.48545	0.141431	1.51469	0.0969947	M
CSbapl.48543	0.133706	0	0	M
CSbapl.48540	0.0560748	0.0936575	0.0094168	M
CSbapl.48541	0.13253	0	0	M
CSbapl.51378	0.821225	41.5806	0.394584	M
CSbapl.12962	0.8083	1.76663	0.107038	M
CSbapl.19128	0.150943	0.139734	0.0137575	M
CSbapl.19129	0.111111	0.0862103	0.00869812	M
CSbapl.19122	0.0952381	0.0270495	0.00280735	M
CSbapl.1620	0.0806452	0.154638	0.0151239	M
CSbapl.1623	0.0833333	3.13691	0.149355	M
CSbapl.1624	0.267857	0.905371	0.0678092	M
CSbapl.1626	0.285714	0.657946	0.0531785	M
CSbapl.34086	0.840125	0.714688	0.0567181	M
CSbapl.72111	0.965517	16.9745	0.303869	M
CSbapl.72113	0.674699	29.8663	0.360743	M
CSbapl.9452	0.0533005	0	0	M
CSbapl.72116	0.125	0.0993979	0.00996744	M
CSbapl.72117	0.875543	8.15681	0.232928	M
CSbapl.72118	0.816267	52.925	0.419428	M
CSbapl.72119	0.25	1.18317	0.0821248	M
CSbapl.9458	0.854666	1.49161	0.0960249	M
CSbapl.65985	0.0711297	0.193026	0.0185641	M
CSbapl.87568	0.869748	3.09636	0.148319	M
CSbapl.65989	0.0827068	0.0356869	0.00368823	M
CSbapl.14068	0.133333	0	0	M
CSbapl.14062	0.0909091	0	0	M
CSbapl.97519	0.135417	4.53717	0.180019	M
CSbapl.58059	0.785515	5.3626	0.194635	M
CSbapl.58058	0.83432	9.63033	0.248623	M
CSbapl.58055	0.548619	0.669447	0.0539056	M
CSbapl.97513	0.560526	0.167522	0.0162912	M
CSbapl.58056	0.0942761	9.30749	0.245379	M
CSbapl.97515	0.140187	3.91398	0.167461	M
CSbapl.97514	0.121212	0.0947499	0.00952182	M
CSbapl.58053	0.1	1.80266	0.108399	M
CSbapl.23282	0.787879	1.62004	0.101312	M
CSbapl.36308	0.0753769	0.179316	0.0173484	M
CSbapl.23280	0.797619	0.126881	0.0125645	M
CSbapl.39178	0.859504	9.84265	0.250703	M
CSbapl.39173	0.987654	0	0	M
CSbapl.39172	0.926531	1.28007	0.0866927	M
CSbapl.96640	0.107843	0	0	M
CSbapl.39170	0.798742	0.412717	0.0363423	M
CSbapl.36305	0.0729927	0.0194101	0.00202205	M
CSbapl.36304	0.11828	0	0	M
CSbapl.96644	0.193548	0.945548	0.0700041	M
CSbapl.39174	0.71599	1.09116	0.0775957	M
CSbapl.782	0.733751	0.210396	0.0200845	M
CSbapl.783	0.784123	10.3137	0.255176	M
CSbapl.781	0.0923077	18.6845	0.313428	M
CSbapl.787	0.885228	8.03354	0.231503	M
CSbapl.785	0.74069	12.7235	0.275487	M
CSbapl.789	0.762759	18.1367	0.31046	M
CSbapl.91917	0.770915	19.6308	0.318367	M
CSbapl.91916	0.0700637	4.66066	0.182339	M
CSbapl.91912	0.0628571	3.45784	0.157214	M
CSbapl.91919	0.193789	12.2953	0.272152	M
CSbapl.22480	0.164557	0	0	M
CSbapl.67857	0.0967742	0	0	M
CSbapl.67855	0.190476	0.157333	0.0153692	M
CSbapl.7503	0.0842105	0.279427	0.0259184	M
CSbapl.67859	0.0720721	0	0	M
CSbapl.17609	0.0877193	0.0578116	0.00591154	M
CSbapl.17607	0.0940171	0.0432316	0.00445169	M
CSbapl.24885	0.173228	9.93781	0.251622	M
CSbapl.29875	0.0689655	0	0	M
CSbapl.29874	0.116788	0	0	M
CSbapl.24881	0.106383	0.104984	0.0105005	M
CSbapl.24880	0.755814	0.660741	0.0533557	M
CSbapl.29871	0.111111	0.130523	0.0129039	M
CSbapl.13775	0.0884956	0	0	M
CSbapl.98397	0.2	0.331181	0.0300894	M
CSbapl.12709	0.606987	0.0539715	0.005529	M
CSbapl.24889	0.0722022	0.840086	0.0641421	M
CSbapl.13770	0.111111	0	0	M
CSbapl.29878	0.0892857	0.144529	0.014199	M
CSbapl.22734	0.1	0.420788	0.0369416	M
CSbapl.22736	0.232238	1.76969	0.107154	M
CSbapl.22733	0.15625	0	0	M
CSbapl.22732	0.583871	2.73095	0.138491	M
CSbapl.101109	0.51983	1.54939	0.0984361	M
CSbapl.101107	0.202073	0	0	M
CSbapl.24771	0.111111	0	0	M
CSbapl.38220	0.084507	4.08414	0.171041	M
CSbapl.24776	0.097561	1.76624	0.107023	M
CSbapl.24775	0.111111	1.02337	0.0741295	M
CSbapl.24774	0.142857	1.89544	0.111824	M
CSbapl.35653	0.0448808	0.0321182	0.00332518	M
CSbapl.35650	0.0603015	0	0	M
CSbapl.61180	0.59268	21.0037	0.325144	M
CSbapl.35656	0.126984	0	0	M
CSbapl.35657	0.128205	0.0692111	0.00703898	M
CSbapl.94730	0.0980392	0	0	M
CSbapl.94731	0.12	0	0	M
CSbapl.80215	0.0481172	0	0	M
CSbapl.80212	0.0677966	0.059028	0.00603242	M
CSbapl.94735	0.105691	11.0134	0.261488	M
CSbapl.80211	0.0718232	0	0	M
CSbapl.94739	0.720548	8.12189	0.232526	M
CSbapl.80219	0.0315079	0.167206	0.0162627	M
CSbapl.72754	0.727273	0.617978	0.0506118	M
CSbapl.11609	0.813754	20.751	0.323929	M
CSbapl.60858	0.663339	3.31878	0.15388	M
CSbapl.60859	0.114943	0.153728	0.015041	M
CSbapl.11603	0.0933333	0.338814	0.0306908	M
CSbapl.60857	0.849687	5.04471	0.189244	M
CSbapl.11601	0.125	0	0	M
CSbapl.11607	0.0743802	0.251972	0.0236368	M
CSbapl.60853	0.0886076	0	0	M
CSbapl.11604	0.0699301	0	0	M
CSbapl.3973	0.824916	12.3738	0.272771	M
CSbapl.10955	0.736364	23.9397	0.338318	M
CSbapl.10956	0.815308	181.3	0.547547	M
CSbapl.10950	0.791816	12.7983	0.276058	M
CSbapl.10951	0.66994	201.327	0.558511	M
CSbapl.52180	0.721088	4.85149	0.185827	M
CSbapl.61727	0.097561	1.23228	0.0844646	M
CSbapl.61726	0.0945946	0.0743677	0.00754504	M
CSbapl.61725	0.0414201	0.0921534	0.00927205	M
CSbapl.3978	0.826954	0.241391	0.022744	M
CSbapl.61722	0.045977	0.0589458	0.00602425	M
CSbapl.61721	0.588235	0	0	M
CSbapl.61720	0.05	0.246827	0.0232037	M
CSbapl.93420	0.873149	15.1966	0.292914	M
CSbapl.93423	0.758478	6.0489	0.205409	M
CSbapl.93422	0.728015	5.80683	0.201734	M
CSbapl.93426	0.123077	0.374402	0.0334502	M
CSbapl.69533	0.785894	0.932611	0.0693023	M
CSbapl.69530	0.227273	0.252726	0.0237001	M
CSbapl.69531	0.587413	4.57319	0.180701	M
CSbapl.69536	0.482759	0.216799	0.0206394	M
CSbapl.69537	0.619403	0	0	M
CSbapl.69534	0.553191	0.304637	0.0279708	M
CSbapl.6250	0.0869565	0.270217	0.0251586	M
CSbapl.65121	0.841402	1.73776	0.105934	M
CSbapl.28087	0.0636364	0.17698	0.0171398	M
CSbapl.81165	0.0692042	3.15738	0.149874	M
CSbapl.20250	0.101449	0	0	M
CSbapl.65123	0.2	6.28352	0.208853	M
CSbapl.81160	0.25819	5.98627	0.204471	M
CSbapl.81169	0.253846	0	0	M
CSbapl.39348	0.853823	1.7704	0.107181	M
CSbapl.55705	0.1	0.100286	0.0100523	M
CSbapl.90735	0.0925926	0	0	M
CSbapl.90736	0.114286	0	0	M
CSbapl.90737	0.841935	21.0701	0.325461	M
CSbapl.90731	0.137931	1.50764	0.0966994	M
CSbapl.90738	0.0686275	0.0833939	0.00842503	M
CSbapl.90739	0.817241	0.443072	0.0385785	M
CSbapl.21612	0.0729167	0.123882	0.0122842	M
CSbapl.21611	0.115789	1.41234	0.0926241	M
CSbapl.93281	0.7	2.45599	0.130439	M
CSbapl.21616	0.26087	0	0	M
CSbapl.21615	0.0901639	0.0729038	0.00740162	M
CSbapl.93282	0.830769	9.55055	0.24783	M
CSbapl.5653	0.0825688	0	0	M
CSbapl.92772	0.112069	0.0497717	0.00510904	M
CSbapl.72189	0.107143	0.235254	0.0222228	M
CSbapl.92776	0.818182	1.79053	0.107942	M
CSbapl.92777	0.105263	6.13501	0.206686	M
CSbapl.92774	0.810047	0.386556	0.0343763	M
CSbapl.67072	0.153846	0.146367	0.0143678	M
CSbapl.92778	0.409701	4.82801	0.185404	M
CSbapl.67078	0.888889	0.561513	0.0468755	M
CSbapl.90883	0.0909091	0	0	M
CSbapl.90886	0.761468	36.2919	0.380635	M
CSbapl.63760	0.0395257	0.138017	0.0135989	M
CSbapl.8555	0.2	0	0	M
CSbapl.90889	0.0789474	0.209385	0.0199966	M
CSbapl.63768	0.097561	0.0242467	0.00251991	M
CSbapl.53022	0.589831	25.9857	0.346611	M
CSbapl.53024	0.0628019	0	0	M
CSbapl.53029	0.0477528	0.310646	0.0284542	M
CSbapl.92488	0.804175	22.5429	0.332255	M
CSbapl.92489	0.111842	0.710288	0.0564478	M
CSbapl.57912	0.746032	5.35031	0.194432	M
CSbapl.21922	0.792105	0.0509611	0.00522814	M
CSbapl.92484	0.737913	752.434	0.696801	M
CSbapl.92485	0.695446	37.9183	0.385125	M
CSbapl.92486	0.83368	26.9701	0.35038	M
CSbapl.92487	0.097561	5.31309	0.193813	M
CSbapl.25912	0.1	0.279408	0.0259169	M
CSbapl.25919	0.787194	13.3648	0.280291	M
CSbapl.29020	0.710875	3.26405	0.152539	M
CSbapl.29023	0.225806	0	0	M
CSbapl.29024	0.513661	2.1507	0.120711	M
CSbapl.29027	0.868421	9.93404	0.251586	M
CSbapl.86306	0.2	1.20137	0.0829979	M
CSbapl.29029	0.473684	9.85192	0.250793	M
CSbapl.86303	0.166667	0	0	M
CSbapl.27518	0.2	0.0961129	0.00965269	M
CSbapl.27516	0.112903	0.323136	0.0294518	M
CSbapl.27512	0.0736196	0.39099	0.0347122	M
CSbapl.44663	0.0204415	0.0957271	0.00961566	M
CSbapl.44662	0.2	0.0409499	0.00422139	M
CSbapl.44661	0.0433839	0	0	M
CSbapl.44660	0.045977	1.08845	0.0774592	M
CSbapl.44667	0.0454545	1.6526	0.10261	M
CSbapl.44666	0.027027	0.385411	0.0342894	M
CSbapl.44665	0.125	0	0	M
CSbapl.44669	0.0236422	0.413753	0.0364195	M
CSbapl.80488	0.171587	0.167726	0.0163096	M
CSbapl.99702	0.847887	12.5394	0.274066	M
CSbapl.45399	0.0978261	0.394581	0.0349833	M
CSbapl.54247	0.0828729	0	0	M
CSbapl.99707	0.101449	0	0	M
CSbapl.99704	0.772727	13.6437	0.282313	M
CSbapl.54243	0.120773	0	0	M
CSbapl.45390	0.693635	22.3837	0.331542	M
CSbapl.99708	0.0633333	0	0	M
CSbapl.45393	0.114504	0	0	M
CSbapl.45394	0.1	1.52592	0.0974634	M
CSbapl.54249	0.0408719	0.0614249	0.00627021	M
CSbapl.45396	0.0512821	0	0	M
CSbapl.42629	0.111111	0.134018	0.0132286	M
CSbapl.42621	0.703659	25.5781	0.34501	M
CSbapl.42624	0.12069	0	0	M
CSbapl.42626	0.0987654	0	0	M
CSbapl.5469	0.889764	4.18431	0.173093	M
CSbapl.52371	0.0918367	0	0	M
CSbapl.5463	0.487923	3.41017	0.156083	M
CSbapl.5461	0.818493	75.5016	0.456213	M
CSbapl.5460	0.2	3.26891	0.152659	M
CSbapl.82531	0.563356	0.054939	0.00562551	M
CSbapl.5465	0.837014	11.7877	0.268058	M
CSbapl.51542	0.748804	4.58783	0.180977	M
CSbapl.51545	0.797923	1.66195	0.10298	M
CSbapl.54794	0.166667	0	0	M
CSbapl.66844	0.125	1.34813	0.0897865	M
CSbapl.66843	0.768156	8.23496	0.233822	M
CSbapl.66841	0.0909091	1.90841	0.112294	M
CSbapl.66840	0.0923077	2.80964	0.140686	M
CSbapl.57263	0.796491	4.20606	0.173534	M
CSbapl.52089	0.0932642	0.0397244	0.00409748	M
CSbapl.57267	0.0789474	0.434294	0.0379367	M
CSbapl.57266	0.102273	0.469166	0.0404634	M
CSbapl.57265	0.0902778	0.139541	0.0137396	M
CSbapl.57264	0.822967	7.34593	0.223175	M
CSbapl.57268	0.0745342	0.268462	0.0250131	M
CSbapl.52085	0.0963855	0.0748323	0.00759052	M
CSbapl.56799	0.646204	0.0801194	0.00810664	M
CSbapl.28868	0.320513	1.26469	0.0859806	M
CSbapl.28867	0.822785	0.0203618	0.00212021	M
CSbapl.28866	0.486486	0.170775	0.0165838	M
CSbapl.28865	0.391304	0.531869	0.0448594	M
CSbapl.56794	0.592339	0.821898	0.0630972	M
CSbapl.28862	0.125	7.44323	0.224394	M
CSbapl.28861	0.0990338	4.39672	0.177317	M
CSbapl.81479	0.0671141	20.2073	0.321266	M
CSbapl.81947	0.667482	0.644275	0.0523076	M
CSbapl.81946	0.112903	0	0	M
CSbapl.45539	0.696875	14.5447	0.288593	M
CSbapl.28552	0.0952381	0	0	M
CSbapl.45534	0.113636	0	0	M
CSbapl.45535	0.1	0.0597722	0.0061063	M
CSbapl.45536	0.0430622	0.0799453	0.00808968	M
CSbapl.45537	0.0482234	0.0132415	0.00138364	M
CSbapl.81949	0.783104	6.30459	0.209157	M
CSbapl.55998	0.0866142	0	0	M
CSbapl.31300	0.797235	9.94277	0.25167	M
CSbapl.31303	0.2	0	0	M
CSbapl.31304	0.125	0.163527	0.0159306	M
CSbapl.31307	0.173913	1.06991	0.0765211	M
CSbapl.2168	0.15	0	0	M
CSbapl.2165	0.142857	0	0	M
CSbapl.81473	0.758779	20.5107	0.32276	M
CSbapl.2161	0.125	0.386695	0.0343869	M
CSbapl.2160	0.0967742	0.478432	0.0411248	M
CSbapl.84279	0.242199	0.628612	0.0513008	M
CSbapl.28558	0.715719	1.19858	0.0828646	M
CSbapl.84271	0.047619	0	0	M
CSbapl.55688	0.129032	0.223352	0.0212044	M
CSbapl.56139	0.0952381	0.0823574	0.00832435	M
CSbapl.56136	0.076087	0.0674085	0.0068615	M
CSbapl.24887	0.805825	0.21397	0.0203946	M
CSbapl.55535	0.142857	0.0979533	0.00982914	M
CSbapl.53560	0.0869565	0.113305	0.0112897	M
CSbapl.53561	0.0491228	0	0	M
CSbapl.53569	0.0872093	0	0	M
CSbapl.2781	0.0833333	0.0827286	0.00836043	M
CSbapl.2784	0.174757	0.107061	0.010698	M
CSbapl.84899	0.078125	0.856373	0.0650689	M
CSbapl.86125	0.0774648	8.89967	0.241133	M
CSbapl.89449	0.0566038	0.188977	0.0182065	M
CSbapl.89446	0.0867347	0	0	M
CSbapl.78984	0.134615	333.906	0.61152	M
CSbapl.78981	0.81559	4.28415	0.1751	M
CSbapl.78983	0.671875	4.71289	0.183305	M
CSbapl.78982	0.838046	4.09966	0.171362	M
CSbapl.48708	0.879728	6.21055	0.207794	M
CSbapl.48709	0.878378	13.4519	0.280926	M
CSbapl.3783	0.0821429	6.00447	0.204744	M
CSbapl.3784	0.137255	123.654	0.507566	M
CSbapl.48700	0.692615	2.89582	0.143039	M
CSbapl.48701	0.885496	19.5431	0.317919	M
CSbapl.48702	0.870283	3.95353	0.168304	M
CSbapl.48703	0.366667	1.37463	0.0909667	M
CSbapl.48706	0.777148	43.4537	0.399112	M
CSbapl.47701	0.0945946	0	0	M
CSbapl.40571	0.448622	2.72525	0.13833	M
CSbapl.47702	0.1	0	0	M
CSbapl.47705	0.145833	0.0404999	0.00417591	M
CSbapl.40575	0.0645161	4.75691	0.184113	M
CSbapl.40574	0.791528	2.49758	0.131697	M
CSbapl.41625	0.142857	0	0	M
CSbapl.41626	0.392523	0	0	M
CSbapl.41620	0.166667	0	0	M
CSbapl.41622	0.0932203	0.299824	0.0275821	M
CSbapl.72353	0.132812	1.11366	0.0787213	M
CSbapl.4789	0.108696	0.637579	0.0518784	M
CSbapl.72354	0.238095	0	0	M
CSbapl.77187	0.0564103	0	0	M
CSbapl.77189	0.0792079	0	0	M
CSbapl.4787	0.1	0	0	M
CSbapl.72359	0.190476	0.0548753	0.00561916	M
CSbapl.4781	0.0833333	0.0809998	0.00819234	M
CSbapl.4783	0.0677966	1.45531	0.094481	M
CSbapl.68915	0.133333	0	0	M
CSbapl.68913	0.11828	0.524595	0.0443588	M
CSbapl.68912	0.25	58.2368	0.42931	M
CSbapl.68910	0.675066	17.9199	0.309261	M
CSbapl.37075	0.0833333	0.209348	0.0199934	M
CSbapl.40399	0.0260047	0.533202	0.044951	M
CSbapl.37078	0.8	31.0348	0.364652	M
CSbapl.37079	0.132075	0.507822	0.0431952	M
CSbapl.4257	0.915493	1.64141	0.102166	M
CSbapl.4256	0.784884	0.937932	0.0695915	M
CSbapl.4255	0.846847	3.52073	0.158687	M
CSbapl.4254	0.582418	0.47347	0.0407711	M
CSbapl.4253	0.105263	0	0	M
CSbapl.4252	0.107843	0.216241	0.0205912	M
CSbapl.4250	0.0813397	0	0	M
CSbapl.74197	0.20155	96.3366	0.481547	M
CSbapl.74193	0.119048	1.3227	0.0886412	M
CSbapl.33791	0.818016	23.1912	0.335113	M
CSbapl.33792	0.8875	3.24116	0.151973	M
CSbapl.33794	0.45122	32.1836	0.368358	M
CSbapl.33797	0.2	0.174046	0.0168773	M
CSbapl.70863	0.166667	0.0805572	0.00814927	M
CSbapl.36671	0.69341	6.34791	0.209779	M
CSbapl.36670	0.785714	2.91764	0.143627	M
CSbapl.36672	0.153846	4.47077	0.17875	M
CSbapl.76871	0.0276074	0	0	M
CSbapl.6303	0.0725806	3.67732	0.162269	M
CSbapl.38619	0.768116	3.68669	0.162479	M
CSbapl.90306	0.0736196	0.337959	0.0306236	M
CSbapl.71119	0.0967742	0	0	M
CSbapl.71118	0.12963	0.428663	0.037523	M
CSbapl.76328	0.194444	0	0	M
CSbapl.71111	0.047619	0.352783	0.0317826	M
CSbapl.71110	0.0981595	0.428163	0.0374861	M
CSbapl.76325	0.133333	0	0	M
CSbapl.76323	0.125	0	0	M
CSbapl.71117	0.133333	0	0	M
CSbapl.70249	0.940789	3.61921	0.160954	M
CSbapl.24578	0.114754	1.91467	0.11252	M
CSbapl.24574	0.927374	1.93362	0.113202	M
CSbapl.70240	0.862595	3.79072	0.164789	M
CSbapl.24576	0.15	1.44993	0.0942503	M
CSbapl.70244	0.871662	37.4346	0.383809	M
CSbapl.24572	0.616438	2.53742	0.132888	M
CSbapl.64118	0.181818	0	0	M
CSbapl.78470	0.166667	0.0948037	0.00952698	M
CSbapl.64113	0.0851064	0.0809998	0.00819234	M
CSbapl.64112	0.0987654	0	0	M
CSbapl.64111	0.683919	287.736	0.595917	M
CSbapl.64110	0.315876	0.0583967	0.0059697	M
CSbapl.91965	0.849335	0.377167	0.0336617	M
CSbapl.91963	0.798464	18.9252	0.314707	M
CSbapl.88188	0.819168	4.0525	0.170385	M
CSbapl.35323	0.0985915	0	0	M
CSbapl.35326	0.142857	0	0	M
CSbapl.35327	0.0952381	0	0	M
CSbapl.35324	0.0985915	0	0	M
CSbapl.35325	0.252336	0	0	M
CSbapl.75741	0.118056	0.223317	0.0212013	M
CSbapl.35329	0.0990099	0	0	M
CSbapl.87203	0.908819	13.2675	0.279575	M
CSbapl.87204	0.70217	37.533	0.384078	M
CSbapl.87205	0.74	0.26139	0.024425	M
CSbapl.87206	0.659509	0.279604	0.025933	M
CSbapl.87207	0.166667	0.0524625	0.0053783	M
CSbapl.87208	0.775451	84.823	0.468306	M
CSbapl.87209	0.750285	2.04916	0.117265	M
CSbapl.91969	0.100917	78.0779	0.459696	M
CSbapl.88452	0.377358	1.161	0.0810513	M
CSbapl.88454	0.126482	1.88758	0.111538	M
CSbapl.69734	0.166667	0.244226	0.022984	M
CSbapl.69735	0.0973451	0.369234	0.033054	M
CSbapl.69736	0.142857	0.0383164	0.00395495	M
CSbapl.75303	0.0888889	0.0613927	0.00626702	M
CSbapl.69731	0.117241	0.328279	0.0298599	M
CSbapl.69732	0.125	0	0	M
CSbapl.67823	0.142857	0.111575	0.011126	M
CSbapl.62616	0.652174	0.360432	0.0323756	M
CSbapl.62617	0.901639	0.0377999	0.00390262	M
CSbapl.62610	0.811765	0.288751	0.0266822	M
CSbapl.75307	0.133333	3.96068	0.168455	M
CSbapl.65648	0.10989	2.25396	0.124103	M
CSbapl.62618	0.0588235	0	0	M
CSbapl.69882	0.0765027	0.972643	0.0714588	M
CSbapl.69881	0.729492	24.002	0.33858	M
CSbapl.69884	0.130435	0.658208	0.0531951	M
CSbapl.67325	0.0810811	0	0	M
CSbapl.65391	0.102804	0	0	M
CSbapl.65394	0.42577	0.853812	0.0649237	M
CSbapl.65395	0.679417	0.0965679	0.00969634	M
CSbapl.76741	0.521531	0.385474	0.0342942	M
CSbapl.67329	0.105263	0	0	M
CSbapl.30918	0.607273	1.30243	0.087719	M
CSbapl.30919	0.793072	0.842984	0.0643076	M
CSbapl.30917	0.758767	6.30542	0.209169	M
CSbapl.5943	0.109223	1.57741	0.0995858	M
CSbapl.40069	0.114754	0	0	M
CSbapl.13958	0.0967742	0.520622	0.0440843	M
CSbapl.29807	0.2	0.0673223	0.00685301	M
CSbapl.13956	0.0980392	0.0695482	0.00707213	M
CSbapl.98349	0.0625	0	0	M
CSbapl.53751	0.105263	5.06429	0.189584	M
CSbapl.21356	0.133829	0.94215	0.0698202	M
CSbapl.20984	0.109091	0.633911	0.0516425	M
CSbapl.20985	0.936709	2.96091	0.144782	M
CSbapl.20987	0.642857	0.208635	0.0199314	M
CSbapl.19629	0.0877193	0.119191	0.0118443	M
CSbapl.21055	0.0649351	0.430496	0.0376578	M
CSbapl.19620	0.0722892	0.413196	0.036378	M
CSbapl.21057	0.2	0.209944	0.0200452	M
CSbapl.19622	0.0653266	0.409639	0.0361129	M
CSbapl.19625	0.36	0.0409976	0.00422621	M
CSbapl.19624	0.142857	0.144529	0.014199	M
CSbapl.19627	0.454039	7.87503	0.22964	M
CSbapl.21052	0.515464	0.866606	0.0656472	M
CSbapl.64939	0.137615	0	0	M
CSbapl.64938	0.136029	2.5407	0.132986	M
CSbapl.13488	0.870968	0.624599	0.0510414	M
CSbapl.9555	0.711846	0.854049	0.0649372	M
CSbapl.64931	0.104478	1.06124	0.07608	M
CSbapl.14450	0.84193	2.20623	0.122549	M
CSbapl.13481	0.148148	0.0302498	0.0031346	M
CSbapl.9558	0.0697674	0	0	M
CSbapl.13487	0.689655	2.06962	0.117969	M
CSbapl.13486	0.166667	0.0842398	0.00850713	M
CSbapl.64936	0.172414	0.146686	0.0143971	M
CSbapl.15326	0.0813008	0	0	M
CSbapl.38857	0.176471	16.8718	0.303267	M
CSbapl.38855	0.111111	0	0	M
CSbapl.38854	0.125	0	0	M
CSbapl.38851	0.340741	0	0	M
CSbapl.27066	0.134328	1.08864	0.077469	M
CSbapl.42428	0.104478	1.31949	0.0884956	M
CSbapl.97498	0.688462	6.27672	0.208755	M
CSbapl.27063	0.818725	20.0815	0.32064	M
CSbapl.27060	0.0764331	0.286252	0.026478	M
CSbapl.27061	0.844106	4.85968	0.185974	M
CSbapl.97490	0.214286	2.39615	0.128601	M
CSbapl.27068	0.1	50.786	0.415171	M
CSbapl.97493	0.366667	0.308933	0.0283166	M
CSbapl.23981	0.252066	0.344044	0.0311009	M
CSbapl.15508	0.690972	5.59173	0.198356	M
CSbapl.23987	0.056872	0	0	M
CSbapl.15504	0.781609	12.9281	0.277043	M
CSbapl.15502	0.951351	0.0205013	0.00213458	M
CSbapl.15503	0.791789	27.0504	0.350681	M
CSbapl.59539	0.193548	0.31154	0.0285259	M
CSbapl.59538	0.191919	0.168306	0.0163617	M
CSbapl.1789	0.101695	0	0	M
CSbapl.59535	0.323144	0	0	M
CSbapl.1787	0.105263	0	0	M
CSbapl.59536	0.175	0.0311222	0.00322363	M
CSbapl.1782	0.0636943	3.50401	0.158298	M
CSbapl.59533	0.2	0.154176	0.0150819	M
CSbapl.42390	0.0847458	1.33536	0.0892131	M
CSbapl.42393	0.13	0	0	M
CSbapl.97729	0.185185	0.578116	0.047988	M
CSbapl.42395	0.0958084	0.691892	0.0553104	M
CSbapl.42396	0.130435	0.0298861	0.00309746	M
CSbapl.97726	0.728022	2.22136	0.123044	M
CSbapl.97727	0.534091	0.991827	0.0724768	M
CSbapl.97724	0.15625	65.4441	0.441387	M
CSbapl.10367	0.163265	0	0	M
CSbapl.10366	0.107143	0.222416	0.0211239	M
CSbapl.73501	0.0503597	0.341733	0.0309199	M
CSbapl.10362	0.628906	3.58618	0.160199	M
CSbapl.32320	0.861314	1.28079	0.0867261	M
CSbapl.6067	0.744054	1.4643	0.0948657	M
CSbapl.18171	0.145455	0	0	M
CSbapl.18176	0.620751	6.95802	0.218169	M
CSbapl.18177	0.812352	13.2529	0.279468	M
CSbapl.18178	0.261905	0.161974	0.0157901	M
CSbapl.18179	0.107914	0.237774	0.0224371	M
CSbapl.6069	0.76406	8.89912	0.241127	M
CSbapl.7337	0.0833333	0.776525	0.0604445	M
CSbapl.7332	0.597386	8.55648	0.237422	M
CSbapl.7338	0.103226	0.296777	0.0273352	M
CSbapl.23364	0.0672269	0.100061	0.0100308	M
CSbapl.23367	0.0588235	0	0	M
CSbapl.23361	0.0877193	0	0	M
CSbapl.60136	0.109375	0.721373	0.0571274	M
CSbapl.60131	0.338272	1.14892	0.0804618	M
CSbapl.60130	0.103774	9.35965	0.24591	M
CSbapl.60133	0.7	0	0	M
CSbapl.60132	0.680402	2.02697	0.116497	M
CSbapl.18281	0.0956522	0	0	M
CSbapl.95380	0.776204	4.12852	0.171955	M
CSbapl.622	0.0992908	0.585496	0.0484787	M
CSbapl.18284	0.803838	10.3441	0.255458	M
CSbapl.18285	0.125	0.566689	0.0472236	M
CSbapl.95384	0.206349	4.99955	0.188455	M
CSbapl.91898	0.151515	5.05886	0.18949	M
CSbapl.91899	0.0833333	0.136805	0.0134867	M
CSbapl.91892	0.530612	4.0281	0.169875	M
CSbapl.56	0.887608	4.34252	0.176255	M
CSbapl.53	0.12766	0.0667057	0.00679222	M
CSbapl.52	0.0943396	0.0566999	0.00580093	M
CSbapl.50	0.0669856	0.223847	0.021247	M
CSbapl.26858	0.2	0	0	M
CSbapl.99985	0.142857	113.295	0.498441	M
CSbapl.99986	0.1875	0.532968	0.0449349	M
CSbapl.26850	0.079096	0.552872	0.0462918	M
CSbapl.26852	0.643636	0.637589	0.051879	M
CSbapl.26855	0.154472	0.270634	0.0251931	M
CSbapl.26857	0.0701754	0	0	M
CSbapl.83976	0.104375	0.0391034	0.00403464	M
CSbapl.96612	0.142857	0.044033	0.00453246	M
CSbapl.95654	0.078125	0	0	M
CSbapl.24724	0.0857143	0.206652	0.0197586	M
CSbapl.91760	0.842956	26.2204	0.347522	M
CSbapl.91761	0.859155	5.77847	0.201295	M
CSbapl.33120	0.154639	0.386239	0.0343522	M
CSbapl.91766	0.818418	2.19111	0.122051	M
CSbapl.91767	0.751276	2388.09	0.818186	M
CSbapl.15774	0.646825	0.141988	0.0139652	M
CSbapl.15773	0.792815	0.404913	0.0357597	M
CSbapl.18828	0.0550285	0	0	M
CSbapl.18829	0.0517799	5.19977	0.191908	M
CSbapl.17839	0.0967742	0.327603	0.0298063	M
CSbapl.17836	0.2	0.0219701	0.00228587	M
CSbapl.17837	0.64124	3.66027	0.161885	M
CSbapl.17834	0.181818	1.94479	0.113602	M
CSbapl.18821	0.0923077	1.24924	0.0852609	M
CSbapl.17830	0.0666667	0	0	M
CSbapl.24726	0.117647	0	0	M
CSbapl.13108	0.470588	0.111193	0.0110899	M
CSbapl.13109	0.21608	0.202073	0.0193587	M
CSbapl.13107	0.39434	0.762283	0.0595979	M
CSbapl.98585	0.194229	0.0306486	0.0031753	M
CSbapl.13103	0.11784	0.142409	0.014004	M
CSbapl.98581	0.598425	0.0360317	0.00372325	M
CSbapl.32651	0.0833333	0	0	M
CSbapl.46898	0.1	0.0866681	0.00874244	M
CSbapl.46899	0.745455	7.38549	0.223672	M
CSbapl.90389	0.697789	2.26974	0.124612	M
CSbapl.32650	0.0505051	0	0	M
CSbapl.46892	0.715466	90.4064	0.474936	M
CSbapl.100046	0.241672	0.193557	0.0186109	M
CSbapl.46890	0.803419	6.10226	0.206203	M
CSbapl.3546	0.723568	1.92642	0.112944	M
CSbapl.38074	0.77381	71.4133	0.450436	M
CSbapl.38077	0.418667	0.0691151	0.00702953	M
CSbapl.38076	0.779817	4.2521	0.17446	M
CSbapl.3542	0.0931373	0.0355552	0.00367487	M
CSbapl.80148	0.560976	2.26358	0.124413	M
CSbapl.3541	0.165289	0	0	M
CSbapl.98639	0.111111	0.091366	0.00919619	M
CSbapl.98638	0.113636	24.7364	0.341625	M
CSbapl.3548	0.820859	3.15579	0.149834	M
CSbapl.3549	0.675676	9.00414	0.242237	M
CSbapl.80406	0.899471	5.68124	0.199775	M
CSbapl.80405	0.782341	0	0	M
CSbapl.48504	0.0952381	0	0	M
CSbapl.80401	0.104167	0.0358039	0.00370012	M
CSbapl.48608	0.86	0.986797	0.0722108	M
CSbapl.80408	0.0956522	0	0	M
CSbapl.20045	0.0583756	0	0	M
CSbapl.20044	0.0503597	0	0	M
CSbapl.20047	0.0716724	0	0	M
CSbapl.20046	0.0655738	0	0	M
CSbapl.25033	0.324786	63.3542	0.438025	M
CSbapl.25032	0.758	7.41492	0.224041	M
CSbapl.20042	0.0625	0.152631	0.014941	M
CSbapl.82312	0.0952381	0	0	M
CSbapl.73224	0.0833333	0.138268	0.013622	M
CSbapl.86802	0.12766	0.350192	0.031581	M
CSbapl.51360	0.373333	0.507727	0.0431886	M
CSbapl.51361	0.136364	0.618544	0.0506486	M
CSbapl.52949	0.0505837	0	0	M
CSbapl.51365	0.904918	9.59204	0.248243	M
CSbapl.66269	0.125	0.0774883	0.00785011	M
CSbapl.66268	0.0851064	0.325495	0.0296392	M
CSbapl.51369	0.0938967	0.0380692	0.0039299	M
CSbapl.66265	0.201943	2.51865	0.132329	M
CSbapl.66262	0.417722	0.620778	0.0507936	M
CSbapl.66260	0.488312	0.797925	0.061704	M
CSbapl.47271	0.292237	0	0	M
CSbapl.47270	0.175439	1.5803	0.0997037	M
CSbapl.58090	0.129032	0.12285	0.0121876	M
CSbapl.12271	0.376682	0	0	M
CSbapl.5860	0.176471	0.460764	0.0398602	M
CSbapl.90964	0.10625	0.0702815	0.00714423	M
CSbapl.90966	0.0924855	0	0	M
CSbapl.90961	0.112676	0	0	M
CSbapl.90963	0.102564	0	0	M
CSbapl.90962	0.0984848	0.0785297	0.00795172	M
CSbapl.90969	0.0590164	10.3325	0.25535	M
CSbapl.4014	0.0948905	6.54271	0.212531	M
CSbapl.4011	0.0746269	0	0	M
CSbapl.4010	0.0810811	2.02233	0.116336	M
CSbapl.4013	0.0423729	0	0	M
CSbapl.68201	0.0651341	0.0882753	0.00889788	M
CSbapl.79100	0.932384	25.5193	0.344777	M
CSbapl.47855	0.146067	0.914695	0.0683226	M
CSbapl.47857	0.0666667	1.3683	0.0906861	M
CSbapl.47850	0.208633	26.3359	0.347967	M
CSbapl.47853	0.0990991	0.0401689	0.00414244	M
CSbapl.47852	0.108434	2.27064	0.124641	M
CSbapl.47858	0.176471	1.04116	0.0750503	M
CSbapl.28545	0.068323	80.567	0.462956	M
CSbapl.28547	0.116279	0	0	M
CSbapl.81466	0.134615	0	0	M
CSbapl.39846	0.107143	0.0349336	0.0036117	M
CSbapl.39843	0.0877193	0	0	M
CSbapl.33801	0.127273	0.298831	0.0275017	M
CSbapl.33800	0.25	0.180639	0.0174663	M
CSbapl.33803	0.0698113	0	0	M
CSbapl.26078	0.879821	7.42024	0.224107	M
CSbapl.26079	0.853604	2.19463	0.122167	M
CSbapl.33808	0.559322	3.44079	0.156811	M
CSbapl.26072	0.475771	2.16418	0.12116	M
CSbapl.26073	0.767647	0.128751	0.0127389	M
CSbapl.26070	0.843195	5.08348	0.189916	M
CSbapl.83197	0.533679	0.113197	0.0112794	M
CSbapl.83190	0.0697674	0.233994	0.0221154	M
CSbapl.83191	0.0909091	0.167919	0.0163269	M
CSbapl.92523	0.0960452	0	0	M
CSbapl.92521	0.0860927	0.0332932	0.00344486	M
CSbapl.94239	0.763393	6.00706	0.204783	M
CSbapl.54454	0.315493	4.92867	0.187205	M
CSbapl.99510	0.192308	0	0	M
CSbapl.99518	0.133333	0	0	M
CSbapl.78277	0.744503	15.6242	0.295655	M
CSbapl.78276	0.105263	1.78769	0.107835	M
CSbapl.78270	0.165468	0	0	M
CSbapl.61284	0.5	0	0	M
CSbapl.4900	0.0769231	0	0	M
CSbapl.78279	0.0759494	0	0	M
CSbapl.78278	0.2	4.09556	0.171277	M
CSbapl.94236	0.691235	4.12013	0.171783	M
CSbapl.61288	0.0877193	0	0	M
CSbapl.5057	0.125	0.129316	0.0127915	M
CSbapl.5055	0.0989011	0.103091	0.0103202	M
CSbapl.6502	0.164384	0.06117	0.00624495	M
CSbapl.42988	0.915033	1.96674	0.114383	M
CSbapl.42984	0.157895	0.117	0.0116381	M
CSbapl.27306	0.0333333	0.112912	0.0112525	M
CSbapl.27305	0.222222	6.36219	0.209983	M
CSbapl.27303	0.2	0	0	M
CSbapl.27302	0.52381	1.9947	0.11537	M
CSbapl.42983	0.0909091	0.648738	0.0525927	M
CSbapl.9411	0.834254	0	0	M
CSbapl.87445	0.805263	3.58153	0.160092	M
CSbapl.62958	0.1375	0.218649	0.0207992	M
CSbapl.88613	0.0469043	0.0483194	0.00496342	M
CSbapl.88611	0.077381	0.873016	0.0660077	M
CSbapl.88615	0.0720461	0	0	M
CSbapl.88619	0.079096	0	0	M
CSbapl.31296	0.810345	0.0202778	0.00211155	M
CSbapl.87998	0.178571	0.153863	0.0150533	M
CSbapl.12476	0.622074	0	0	M
CSbapl.52125	0.107692	0.830837	0.063612	M
CSbapl.31292	0.75122	0	0	M
CSbapl.52128	0.0869565	38.1984	0.385879	M
CSbapl.87994	0.139535	0	0	M
CSbapl.31293	0.157233	0.260862	0.024381	M
CSbapl.77227	0.079602	1.05234	0.0756245	M
CSbapl.62952	0.580142	1.82779	0.109338	M
CSbapl.85597	0.133333	0	0	M
CSbapl.77238	0.0784314	0	0	M
CSbapl.77234	0.130435	0	0	M
CSbapl.77235	0.105263	0	0	M
CSbapl.41981	0.491525	1.32264	0.0886382	M
CSbapl.77230	0.83871	0	0	M
CSbapl.85599	0.111111	0	0	M
CSbapl.65942	0.108434	0	0	M
CSbapl.2084	0.360544	0.772644	0.0602145	M
CSbapl.2081	0.652695	0.904754	0.0677751	M
CSbapl.36955	0.535117	0.93588	0.0694801	M
CSbapl.2088	0.105263	6.43082	0.210959	M
CSbapl.2089	0.0909091	0	0	M
CSbapl.36950	0.0821918	0	0	M
CSbapl.31518	0.102041	0.0963245	0.00967299	M
CSbapl.31512	0.0932203	0.108691	0.0108528	M
CSbapl.60323	0.646043	21.5663	0.327799	M
CSbapl.2338	0.119048	0.68219	0.0547054	M
CSbapl.2336	0.0862069	0.362615	0.0325443	M
CSbapl.2334	0.76267	0.623267	0.050955	M
CSbapl.2335	0.111111	0	0	M
CSbapl.2332	0.260054	9.87199	0.250987	M
CSbapl.2333	0.816918	11.1336	0.262535	M
CSbapl.55472	0.713689	9.89748	0.251233	M
CSbapl.43169	0.328239	5.94766	0.203888	M
CSbapl.43168	0.181818	1.13332	0.0796954	M
CSbapl.90428	0.0710383	47.095	0.407393	M
CSbapl.43165	0.46875	0	0	M
CSbapl.43167	0.111111	10.2945	0.254997	M
CSbapl.43161	0.0714286	0.252932	0.0237174	M
CSbapl.43160	0.1	0	0	M
CSbapl.100900	0.860182	0.275055	0.0255584	M
CSbapl.37916	0.136364	0.221684	0.0210608	M
CSbapl.37915	0.0945946	0.824726	0.0632603	M
CSbapl.37914	0.1	0	0	M
CSbapl.37913	0.45674	0.203997	0.0195269	M
CSbapl.37912	0.166667	0.114279	0.0113816	M
CSbapl.37911	0.0743243	0	0	M
CSbapl.37918	0.105263	0.387846	0.0344741	M
CSbapl.76546	0.608059	3.31723	0.153843	M
CSbapl.76543	0.0677966	0.260113	0.0243185	M
CSbapl.43298	0.0869565	0.237849	0.0224435	M
CSbapl.43293	0.864198	0.199892	0.0191677	M
CSbapl.46660	0.611521	1.84313	0.109907	M
CSbapl.46663	0.853273	9.66182	0.248934	M
CSbapl.46665	0.0855615	0.0699452	0.00711117	M
CSbapl.19424	0.140625	0.066233	0.0067456	M
CSbapl.47131	0.0666667	0.430206	0.0376365	M
CSbapl.14617	0.0805369	0	0	M
CSbapl.47137	0.116279	0.3602	0.0323577	M
CSbapl.49860	0.0980392	0	0	M
CSbapl.66532	0.0898876	0	0	M
CSbapl.30649	0.487445	0.146769	0.0144047	M
CSbapl.66536	0.4	1.44638	0.0940978	M
CSbapl.3069	0.845818	3.4784	0.157698	M
CSbapl.66535	0.1	0.358421	0.0322201	M
CSbapl.66392	0.688645	1.2633	0.0859164	M
CSbapl.3064	0.0833333	0.653182	0.0528758	M
CSbapl.3067	0.830258	47.6125	0.408519	M
CSbapl.3066	0.886792	9.95131	0.251752	M
CSbapl.3061	0.115385	0.507589	0.043179	M
CSbapl.69563	0.111111	0	0	M
CSbapl.3063	0.0359281	0.632669	0.0515625	M
CSbapl.22216	0.864662	2.18493	0.121847	M
CSbapl.75169	0.644219	0.0121335	0.00126856	M
CSbapl.75164	0.760492	4.66689	0.182455	M
CSbapl.75166	0.425325	0.314183	0.0287376	M
CSbapl.72567	0.829303	1.70021	0.104482	M
CSbapl.43839	0.0707071	0	0	M
CSbapl.34558	0.160305	2.05552	0.117484	M
CSbapl.48118	0.731518	15.5132	0.294951	M
CSbapl.48115	0.106383	4.67239	0.182557	M
CSbapl.7033	0.110092	0.00250635	0.000263297	M
CSbapl.101144	0.16	0	0	M
CSbapl.49243	0.0810811	0.12285	0.0121876	M
CSbapl.49240	0.145833	0.121834	0.0120924	M
CSbapl.49241	0.830177	1.11558	0.0788171	M
CSbapl.49246	0.536854	0.0657842	0.00670132	M
CSbapl.49247	0.287879	0	0	M
CSbapl.49245	0.525384	404.276	0.63158	M
CSbapl.65864	0.105263	0.0728012	0.00739156	M
CSbapl.41474	0.08125	0	0	M
CSbapl.68898	0.137931	3.752	0.163935	M
CSbapl.41471	0.0952381	0.125404	0.0124266	M
CSbapl.65862	0.0666667	0.0316527	0.00327773	M
CSbapl.65863	0.0928571	0.327877	0.029828	M
CSbapl.68890	0.849789	7.04005	0.219248	M
CSbapl.65869	0.12	0.355228	0.0319725	M
CSbapl.68894	0.678746	10.9486	0.260919	M
CSbapl.68895	0.823593	2.87945	0.142596	M
CSbapl.96031	0.263158	0.0349487	0.00361325	M
CSbapl.96033	0.142857	0	0	M
CSbapl.33345	0.0882353	0.142747	0.0140352	M
CSbapl.96038	0.186047	0	0	M
CSbapl.28290	0.0921053	0.224387	0.0212934	M
CSbapl.58976	0.903846	0.445946	0.0387878	M
CSbapl.71094	0.107345	0.854823	0.0649811	M
CSbapl.71095	0.572519	0.235826	0.0222715	M
CSbapl.71097	0.159487	0.28268	0.0261855	M
CSbapl.71090	0.807436	11.2215	0.263294	M
CSbapl.71092	0.795918	1.06571	0.0763078	M
CSbapl.68762	0.843478	13.9054	0.284176	M
CSbapl.23163	0.181818	0	0	M
CSbapl.68766	0.771174	137.19	0.518409	M
CSbapl.23160	0.0735294	1.8933	0.111747	M
CSbapl.68768	0.0490368	13.3703	0.280331	M
CSbapl.79662	0.114943	0.0678272	0.00690275	M
CSbapl.23168	0.125	0	0	M
CSbapl.39137	0.126582	0	0	M
CSbapl.72678	0.688808	0.7671	0.059885	M
CSbapl.72671	0.1	0	0	M
CSbapl.72673	0.117647	4.94971	0.187578	M
CSbapl.72674	0.0631068	0	0	M
CSbapl.36340	0.0869565	0	0	M
CSbapl.36343	0.153846	0.200989	0.0192638	M
CSbapl.71322	0.0695652	0.0793234	0.00802909	M
CSbapl.71320	0.0652174	0.333351	0.0302607	M
CSbapl.39130	0.842149	9.10992	0.243343	M
CSbapl.36734	0.0866142	0.562729	0.0469573	M
CSbapl.8810	0.0701754	1.36912	0.0907225	M
CSbapl.8813	0.263323	108.519	0.493951	M
CSbapl.8815	0.819277	51.5309	0.416673	M
CSbapl.8814	0.740494	154.469	0.530801	M
CSbapl.8816	0.184685	125.557	0.50916	M
CSbapl.74789	0.699187	32.8512	0.370453	M
CSbapl.74788	0.799159	9.57022	0.248026	M
CSbapl.35421	0.245509	4.06825	0.170712	M
CSbapl.35423	0.176471	0.818565	0.0629046	M
CSbapl.32434	0.2	0	0	M
CSbapl.32433	0.2	0	0	M
CSbapl.32432	0.142145	0.105796	0.0105778	M
CSbapl.32431	0.142145	0	0	M
CSbapl.32430	0.0777778	0	0	M
CSbapl.91569	0.133333	5.97364	0.20428	M
CSbapl.32439	0.0952381	0	0	M
CSbapl.36880	0.71358	23.054	0.334514	M
CSbapl.53259	0.106667	0.728595	0.0575677	M
CSbapl.36886	0.933702	0.915794	0.068383	M
CSbapl.73788	0.116667	0.0745993	0.00756771	M
CSbapl.73789	0.15	0	0	M
CSbapl.64099	0.0714286	0.090718	0.00913372	M
CSbapl.73782	0.0850515	0	0	M
CSbapl.64097	0.0909091	1.246	0.085109	M
CSbapl.64094	0.835725	1.90041	0.112005	M
CSbapl.64092	0.876704	115.496	0.500447	M
CSbapl.64093	0.133333	0	0	M
CSbapl.64090	0.119048	0.174461	0.0169145	M
CSbapl.64091	0.104167	0	0	M
CSbapl.60682	0.536204	0.394749	0.034996	M
CSbapl.95711	0.09375	0	0	M
CSbapl.95716	0.103896	0.213245	0.0203317	M
CSbapl.24306	0.836299	1052.46	0.732058	M
CSbapl.95718	0.822199	0.657232	0.0531332	M
CSbapl.24304	0.821015	17.769	0.308419	M
CSbapl.24302	0.130435	1.6961	0.104321	M
CSbapl.24300	0.872535	49.6812	0.412903	M
CSbapl.73251	0.0930233	0.726717	0.0574534	M
CSbapl.61572	0.663441	11.9762	0.269597	M
CSbapl.35283	0.1	0.0676237	0.0068827	M
CSbapl.73257	0.769793	42.0478	0.395732	M
CSbapl.73258	0.0952381	0	0	M
CSbapl.73259	0.0571429	0	0	M
CSbapl.35289	0.148148	0	0	M
CSbapl.61578	0.848046	18.8248	0.314175	M
CSbapl.69382	0.107143	17.7951	0.308565	M
CSbapl.69385	0.0945946	0.922737	0.0687635	M
CSbapl.34489	0.084507	0.091565	0.00921536	M
CSbapl.34480	0.0806452	1.03019	0.0744834	M
CSbapl.39609	0.0517241	0	0	M
CSbapl.61989	0.628141	12.7516	0.275701	M
CSbapl.69965	0.102703	0.461263	0.0398961	M
CSbapl.69964	0.259436	0.130486	0.0129004	M
CSbapl.94041	0.0588235	0	0	M
CSbapl.94047	0.0897436	0.0718609	0.00729933	M
CSbapl.69963	0.341538	1.871	0.110932	M
CSbapl.69969	0.125	0.0378971	0.00391246	M
CSbapl.69968	0.130435	0.46967	0.0404996	M
CSbapl.65055	0.186813	0.0458467	0.00471503	M
CSbapl.62006	0.719424	0.864162	0.0655094	M
CSbapl.65057	0.0980392	0	0	M
CSbapl.65051	0.101852	0.0429795	0.00442627	M
CSbapl.62002	0.8252	9.17045	0.243971	M
CSbapl.62001	0.788438	110.902	0.496215	M
CSbapl.60711	0.0854701	0.182466	0.0176289	M
CSbapl.51001	0.0803571	0	0	M
CSbapl.15202	0.895755	29.4734	0.359396	M
CSbapl.15201	0.662313	2.92447	0.14381	M
CSbapl.51002	0.107383	0.046676	0.0047984	M
CSbapl.15206	0.854054	5.29439	0.193501	M
CSbapl.20534	0.111111	0	0	M
CSbapl.20536	0.142857	0	0	M
CSbapl.26279	0.136364	139.9	0.520452	M
CSbapl.26272	0.166667	0.17614	0.0170647	M
CSbapl.66656	0.0526316	0	0	M
CSbapl.66652	0.122951	0.0723958	0.0073518	M
CSbapl.22978	0.072	0	0	M
CSbapl.22974	0.141026	0	0	M
CSbapl.45749	0.0818713	0	0	M
CSbapl.45748	0.0888889	0	0	M
CSbapl.93906	0.103448	1.45242	0.0943575	M
CSbapl.93907	0.0987654	14.5858	0.288871	M
CSbapl.9980	0.739583	5.32419	0.193998	M
CSbapl.64878	0.166667	0	0	M
CSbapl.9981	0.100228	26.7727	0.349635	M
CSbapl.64876	0.0825688	0	0	M
CSbapl.64877	0.2	0	0	M
CSbapl.64872	0.129496	0.088066	0.00887765	M
CSbapl.50752	0.67284	4.88413	0.186412	M
CSbapl.97028	0.12	0.0188107	0.00196019	M
CSbapl.50750	0.092084	0	0	M
CSbapl.92058	0.151822	1.21949	0.0838603	M
CSbapl.50756	0.678233	13.6855	0.282613	M
CSbapl.50757	0.654567	13.5492	0.281632	M
CSbapl.50754	0.409449	0	0	M
CSbapl.50755	0.767831	0	0	M
CSbapl.58565	0.0980392	0.214556	0.0204454	M
CSbapl.97020	0.0879121	0.917775	0.0684917	M
CSbapl.50758	0.802614	5.09806	0.190168	M
CSbapl.50759	0.749403	34.1369	0.374374	M
CSbapl.97025	0.183333	6.0651	0.205651	M
CSbapl.97027	0.0454545	0.0749274	0.00759982	M
CSbapl.58562	0.171946	0	0	M
CSbapl.10905	0.791463	8.65986	0.238553	M
CSbapl.63068	0.879491	50.7526	0.415103	M
CSbapl.63066	0.102273	0	0	M
CSbapl.5215	0.803774	47.5623	0.408411	M
CSbapl.5216	0.196078	26.1952	0.347424	M
CSbapl.3923	0.781966	34.6769	0.375978	M
CSbapl.63062	0.0373134	0	0	M
CSbapl.5212	0.882909	2.1686	0.121307	M
CSbapl.14626	0.113208	0.161382	0.0157365	M
CSbapl.47124	0.203336	0.0535303	0.00548496	M
CSbapl.50114	0.226804	0	0	M
CSbapl.6749	0.0438729	0	0	M
CSbapl.6748	0.0411348	0.308428	0.0282761	M
CSbapl.47127	0.0977444	0	0	M
CSbapl.9742	0.769475	0	0	M
CSbapl.9740	0.340038	0	0	M
CSbapl.14625	0.226994	0.0868556	0.00876058	M
CSbapl.9487	0.974359	0.083288	0.00841475	M
CSbapl.67346	0.2	1.60965	0.100894	M
CSbapl.50121	0.750983	13.3688	0.280319	M
CSbapl.58691	0.2	0.163292	0.0159094	M
CSbapl.58690	0.117647	0.914624	0.0683188	M
CSbapl.58695	0.32	0.127721	0.0126429	M
CSbapl.58694	0.193939	1.02583	0.0742571	M
CSbapl.99356	0.125	0.446689	0.0388418	M
CSbapl.18323	0.078125	0.0380494	0.0039279	M
CSbapl.1246	0.757669	29.9179	0.360919	M
CSbapl.18321	0.097561	0.877811	0.0662767	M
CSbapl.1244	0.540909	22.6175	0.332588	M
CSbapl.18325	0.486301	1.25146	0.0853644	M
CSbapl.18324	0.778042	8.237	0.233845	M
CSbapl.6299	0.142857	1.87198	0.110968	M
CSbapl.1248	0.71771	22.7581	0.333212	M
CSbapl.42214	0.141026	2.52519	0.132524	M
CSbapl.42216	0.142857	0.497379	0.0424642	M
CSbapl.42210	0.204301	0	0	M
CSbapl.92720	0.767372	5.29112	0.193447	M
CSbapl.12897	0.852041	1.0676	0.0764037	M
CSbapl.12893	0.105263	0.0125144	0.00130814	M
CSbapl.12891	0.133333	0.055857	0.00571699	M
CSbapl.96370	0.142857	0.221813	0.021072	M
CSbapl.96376	0.0818182	3.27265	0.152751	M
CSbapl.62827	0.166667	0	0	M
CSbapl.62820	0.125	2.48555	0.131335	M
CSbapl.62822	0.0438066	6.46466	0.211437	M
CSbapl.56343	0.507042	95.3752	0.480503	M
CSbapl.56341	0.106061	0.389993	0.0346367	M
CSbapl.76022	0.457317	0.191582	0.0184367	M
CSbapl.54851	0.211538	0	0	M
CSbapl.71034	0.0869565	0.491793	0.0420711	M
CSbapl.54858	0.109589	1.11384	0.0787304	M
CSbapl.7164	0.0853659	9.78199	0.250113	M
CSbapl.7165	0.816284	60.9346	0.433994	M
CSbapl.7167	0.794776	3.40899	0.156055	M
CSbapl.7161	0.714544	6.18438	0.207412	M
CSbapl.7162	0.782075	2.9819	0.145338	M
CSbapl.7163	0.13253	0.62431	0.0510226	M
CSbapl.7168	0.704678	36.2766	0.380591	M
CSbapl.7169	0.109091	0.339526	0.0307467	M
CSbapl.28360	0.583333	0.0301662	0.00312607	M
CSbapl.28361	0.0560272	0	0	M
CSbapl.28362	0.125	0.140978	0.0138721	M
CSbapl.28363	0.839357	0.760624	0.0594988	M
CSbapl.28364	0.166667	0.0684024	0.00695939	M
CSbapl.28365	0.650794	0.150429	0.0147398	M
CSbapl.99829	0.166667	0	0	M
CSbapl.10669	0.111111	0.125002	0.012389	M
CSbapl.2536	0.0765957	0.890659	0.0669939	M
CSbapl.2530	0.140351	0.272999	0.0253887	M
CSbapl.99822	0.489796	1.72545	0.10546	M
CSbapl.39261	0.0323887	0	0	M
CSbapl.31299	0.817073	0.257692	0.0241162	M
CSbapl.89818	0.111111	0	0	M
CSbapl.16791	0.121951	0	0	M
CSbapl.89813	0.105882	0	0	M
CSbapl.89810	0.360318	0	0	M
CSbapl.89816	0.0916667	0	0	M
CSbapl.89814	0.0869565	3.20963	0.151188	M
CSbapl.17076	0.842254	1.58715	0.0999827	M
CSbapl.9587	0.776567	3.42151	0.156353	M
CSbapl.1305	0.422222	10.8917	0.260417	M
CSbapl.84992	0.0670732	1.01695	0.0737952	M
CSbapl.84995	0.4	0	0	M
CSbapl.46460	0.2	0.455205	0.0394592	M
CSbapl.46466	0.662338	0.565116	0.0471179	M
CSbapl.46465	0.648352	0.14596	0.0143305	M
CSbapl.46464	0.584034	0	0	M
CSbapl.47335	0.147059	0	0	M
CSbapl.47336	0.166667	0.0969866	0.0097365	M
CSbapl.47337	0.109091	0.0442702	0.00455635	M
CSbapl.40103	0.830489	2.26761	0.124543	M
CSbapl.40100	0.797735	11.3645	0.264518	M
CSbapl.47339	0.11	0.321978	0.0293597	M
CSbapl.40109	0.0549451	0	0	M
CSbapl.44820	0.105263	0.0901575	0.00907965	M
CSbapl.90026	0.878317	0.372661	0.0333169	M
CSbapl.90020	0.796124	3.46286	0.157332	M
CSbapl.44827	0.0984848	0.589669	0.0487551	M
CSbapl.44826	0.0322148	4.39897	0.177361	M
CSbapl.44828	0.166667	0	0	M
CSbapl.90028	0.783603	18.671	0.313356	M
CSbapl.94774	0.0495356	0	0	M
CSbapl.3660	0.0862069	0	0	M
CSbapl.3667	0.0882353	3.41226	0.156133	M
CSbapl.61039	0.641546	6.64721	0.213979	M
CSbapl.61037	0.671533	3.78799	0.164729	M
CSbapl.13315	0.0983607	0.122224	0.0121289	M
CSbapl.61034	0.118557	0	0	M
CSbapl.13313	0.0888889	0	0	M
CSbapl.61032	0.115044	4.17997	0.173005	M
CSbapl.61030	0.687196	193.202	0.5542	M
CSbapl.11221	0.121951	0	0	M
CSbapl.11220	0.0434783	0	0	M
CSbapl.11229	0.185185	0.0368624	0.00380755	M
CSbapl.11228	0.112903	0.0639189	0.00651707	M
CSbapl.82297	0.0694444	0.0609172	0.00621989	M
CSbapl.27918	0.119048	0.12126	0.0120385	M
CSbapl.22104	0.0851064	0	0	M
CSbapl.14959	0.561368	3.30181	0.153466	M
CSbapl.27913	0.142857	0.0520009	0.00533215	M
CSbapl.27910	0.0769231	2.54722	0.133179	M
CSbapl.22105	0.158537	0.29071	0.026842	M
CSbapl.27916	0.135135	1.51533	0.0970213	M
CSbapl.25200	0.515294	3.15984	0.149936	M
CSbapl.25203	0.83781	6.30775	0.209203	M
CSbapl.41273	0.0972222	0.102058	0.0102216	M
CSbapl.76173	0.09375	0	0	M
CSbapl.82128	0.142857	0.180719	0.0174735	M
CSbapl.76171	0.0894309	0	0	M
CSbapl.25208	0.413206	8.5005	0.236804	M
CSbapl.25209	0.109375	0	0	M
CSbapl.82122	0.0963855	0	0	M
CSbapl.82123	0.078125	0	0	M
CSbapl.82120	0.181818	7.19477	0.221252	M
CSbapl.86639	0.142857	0	0	M
CSbapl.86636	0.0639977	0	0	M
CSbapl.86637	0.0639977	0	0	M
CSbapl.86633	0.111111	0	0	M
CSbapl.93590	0.899371	0.534806	0.0450609	M
CSbapl.93592	0.839869	2.89771	0.14309	M
CSbapl.93599	0.637475	3.24412	0.152046	M
CSbapl.82847	0.134454	0.121942	0.0121025	M
CSbapl.11899	0.730424	17.7144	0.308113	M
CSbapl.68562	0.125	0.224025	0.0212622	M
CSbapl.68560	0.0571429	0	0	M
CSbapl.68561	0.214286	18.8699	0.314414	M
CSbapl.68567	0.103448	0.0215341	0.00224098	M
CSbapl.68565	0.310345	0.432939	0.0378373	M
CSbapl.44179	0.498938	0.560691	0.0468201	M
CSbapl.44178	0.79723	15.274	0.293416	M
CSbapl.45888	0.153285	20.8415	0.324365	M
CSbapl.45889	0.105263	0.503592	0.0428997	M
CSbapl.45880	0.0636704	10.494	0.256839	M
CSbapl.45883	0.04	2.82961	0.141236	M
CSbapl.45884	0.617722	10.2595	0.254671	M
CSbapl.45886	0.109589	4.06702	0.170686	M
CSbapl.45887	0.82996	14.8448	0.290604	M
CSbapl.93043	0.691142	3.38318	0.155437	M
CSbapl.93042	0.0522388	0.168418	0.0163719	M
CSbapl.93040	0.117647	0.252738	0.0237011	M
CSbapl.93047	0.0909091	0.154111	0.015076	M
CSbapl.93046	0.834862	0.826677	0.0633727	M
CSbapl.55937	0.0857143	0	0	M
CSbapl.55936	0.0945946	0.853051	0.0648805	M
CSbapl.55931	0.210526	0.049387	0.00507049	M
CSbapl.55933	0.0642202	0	0	M
CSbapl.37055	0.142857	0	0	M
CSbapl.70435	0.0869565	0	0	M
CSbapl.54085	0.0969163	0	0	M
CSbapl.70439	0.0769231	0.111207	0.0110913	M
CSbapl.54088	0.0685484	0.329858	0.0299848	M
CSbapl.83652	0.12	0.122373	0.0121429	M
CSbapl.100361	0.299371	5.23046	0.192427	M
CSbapl.88967	0.142857	0	0	M
CSbapl.45228	0.491103	13.8978	0.284122	M
CSbapl.45225	0.723668	4.99922	0.188449	M
CSbapl.45220	0.718593	13.6852	0.28261	M
CSbapl.45222	0.133333	0.0737301	0.0074826	M
CSbapl.45223	0.830751	181.381	0.547594	M
CSbapl.53196	0.0885417	0.0917662	0.00923475	M
CSbapl.53191	0.220513	0	0	M
CSbapl.53193	0.0780669	0.066795	0.00680103	M
CSbapl.53198	0.0762712	0.119346	0.0118589	M
CSbapl.851	0.829648	7.79027	0.228631	M
CSbapl.92314	0.114286	0	0	M
CSbapl.92315	0.0769231	2.39988	0.128717	M
CSbapl.84568	0.729508	5.61436	0.198717	M
CSbapl.84561	0.64141	2.75047	0.13904	M
CSbapl.84564	0.109091	0	0	M
CSbapl.84566	0.125	0.0726205	0.00737385	M
CSbapl.84567	0.12963	0	0	M
CSbapl.53441	0.955224	2.92015	0.143694	M
CSbapl.53447	0.173913	0	0	M
CSbapl.53448	0.102941	0.916599	0.0684272	M
CSbapl.57572	0.142857	0	0	M
CSbapl.57571	0.14876	0	0	M
CSbapl.57577	0.125	0.0658124	0.0067041	M
CSbapl.57574	0.285714	0	0	M
CSbapl.57578	0.111111	0.0358039	0.00370012	M
CSbapl.92	0.0766423	0.68905	0.0551335	M
CSbapl.91	0.588686	21.6847	0.32835	M
CSbapl.13347	0.05919	0.020822	0.00216763	M
CSbapl.84388	0.0655738	0.116586	0.0115991	M
CSbapl.84384	0.116279	0.111053	0.0110766	M
CSbapl.76999	0.12069	1.70527	0.104679	M
CSbapl.73310	0.173913	2.69993	0.137613	M
CSbapl.73315	0.0792079	0.266443	0.0248455	M
CSbapl.73317	0.646259	2.32548	0.12639	M
CSbapl.52718	0.3125	0.141273	0.0138994	M
CSbapl.65876	0.097561	0.110305	0.0110058	M
CSbapl.52714	0.410714	0.473413	0.0407671	M
CSbapl.52715	0.181818	0.0478053	0.00491182	M
CSbapl.52716	0.803125	34.5557	0.37562	M
CSbapl.52717	0.0909091	1.47053	0.0951311	M
CSbapl.52710	0.672956	0.0121533	0.00127062	M
CSbapl.52711	0.210784	4.75418	0.184063	M
CSbapl.68886	0.147059	0	0	M
CSbapl.56401	0.745578	16.5831	0.301554	M
CSbapl.56625	0.0862069	0	0	M
CSbapl.15049	0.807507	0.104002	0.010407	M
CSbapl.15048	0.671154	5.29979	0.193592	M
CSbapl.15044	0.664677	9.86682	0.250937	M
CSbapl.46147	0.0841751	5.8053	0.20171	M
CSbapl.15041	0.336022	0.336932	0.0305428	M
CSbapl.46141	0.516517	22.517	0.33214	M
CSbapl.15043	0.77755	16.476	0.300911	M
CSbapl.43311	0.866332	16.8974	0.303417	M
CSbapl.85386	0.765625	10.1153	0.253315	M
CSbapl.85383	0.48524	13.6867	0.282622	M
CSbapl.85382	0.1	0.0653903	0.00666244	M
CSbapl.31494	0.9	0.412204	0.0363042	M
CSbapl.31493	0.2	0	0	M
CSbapl.74847	0.0776699	1.24868	0.0852347	M
CSbapl.74840	0.166667	0.0805963	0.00815307	M
CSbapl.2273	0.554273	33.5876	0.372716	M
CSbapl.2272	0.654799	0	0	M
CSbapl.2270	0.812328	34.398	0.375152	M
CSbapl.2275	0.123077	0.0930272	0.00935617	M
CSbapl.99751	0.0689655	0.0273902	0.00284224	M
CSbapl.19217	0.0933333	0.265817	0.0247936	M
CSbapl.19212	0.0909091	0	0	M
CSbapl.99750	0.0580552	0	0	M
CSbapl.19218	0.0763889	2.0609	0.117669	M
CSbapl.19219	0.64494	7.7358	0.227977	M
CSbapl.37898	0.281933	9.24641	0.244754	M
CSbapl.99752	0.029106	0.336175	0.0304833	M
CSbapl.37892	0.123967	0	0	M
CSbapl.37893	0.788732	12.8139	0.276177	M
CSbapl.37890	0.810636	5.33319	0.194148	M
CSbapl.37891	0.825672	84.5786	0.468006	M
CSbapl.37895	0.807549	2.23095	0.123356	M
CSbapl.43213	0.0917431	0.271443	0.02526	M
CSbapl.27860	0.700088	2.7701	0.139589	M
CSbapl.43210	0.156627	1.88926	0.111599	M
CSbapl.73863	0.2	0.208908	0.0199551	M
CSbapl.73862	0.133333	0	0	M
CSbapl.73861	0.137931	0	0	M
CSbapl.21975	0.166667	0.126464	0.0125256	M
CSbapl.21973	0.03	0.849249	0.0646645	M
CSbapl.21970	0.142857	0	0	M
CSbapl.73868	0.0872483	0.0825883	0.00834679	M
CSbapl.48090	0.0882353	186.337	0.550414	M
CSbapl.21978	0.0952381	5.46998	0.196395	M
CSbapl.37762	0.2	0.188279	0.0181447	M
CSbapl.37766	0.100719	0.0608691	0.00621512	M
CSbapl.37768	0.150943	0	0	M
CSbapl.14794	0.781609	7.74248	0.228058	M
CSbapl.40663	0.182573	0.307443	0.0281969	M
CSbapl.15168	0.0641892	0.536537	0.0451795	M
CSbapl.72196	0.84507	12.0691	0.270347	M
[truncated: 30,983 more rows]

## Sheet: F_genebody_5mC_vs_gene_express
Gene	F_5mC_level	expr_count	expr_ratio	group
CSbapl.67933	0.117021	5.96814	0.183648	F	expr_count：fpkm
CSbapl.11333	0.515769	0.0961708	0.00868627	F	expr_ratio：log10(fpkm+1)/max（log10(fpkm+1)）
CSbapl.11331	0.637363	4.63669	0.163588	F
CSbapl.11337	0.571709	0.579592	0.043247	F
CSbapl.11336	0.42619	6.25371	0.187447	F
CSbapl.11334	0.529208	1.52563	0.0876442	F
CSbapl.95455	0.782797	0.429434	0.0337978	F
CSbapl.95453	0.761599	8.35175	0.21148	F
CSbapl.95450	0.0429185	0	0	F
CSbapl.64448	0.686131	0.311202	0.0256307	F
CSbapl.24060	0.530051	5.77579	0.180999	F
CSbapl.24066	0.125	0	0	F
CSbapl.24065	0.126411	0.225771	0.0192573	F
CSbapl.64442	0.0963855	0.131093	0.011653	F
CSbapl.67181	0.339004	0.216726	0.0185567	F
CSbapl.67180	0.0851485	0.228661	0.01948	F
CSbapl.20766	0.0333333	0	0	F
CSbapl.67182	0.279641	0.484918	0.0374002	F
CSbapl.67185	0.0864198	0.20026	0.0172678	F
CSbapl.67184	0.535593	1.51099	0.087094	F
CSbapl.20762	0.0954907	1.41715	0.0834911	F
CSbapl.72578	0.761331	2.05847	0.105753	F
CSbapl.63870	0.08	0.0302986	0.00282362	F
CSbapl.63874	0.149733	0.113464	0.010167	F
CSbapl.62694	0.111111	0	0	F
CSbapl.5136	0.823669	5.38257	0.175344	F
CSbapl.44203	0.166667	0	0	F
CSbapl.90562	0.166667	0.484092	0.0373476	F
CSbapl.18735	0.62906	0.901091	0.0607724	F
CSbapl.68882	0.0666667	0	0	F
CSbapl.38639	0.142857	0	0	F
CSbapl.53604	0.3	0.0592397	0.00544424	F
CSbapl.18730	0.281906	0.22528	0.0192194	F
CSbapl.38631	0.133333	0	0	F
CSbapl.38630	0.501762	0.227486	0.0193896	F
CSbapl.38637	0.174713	0.446377	0.0349125	F
CSbapl.21028	0.181818	0.162684	0.0142589	F
CSbapl.93113	0.0917431	0.29697	0.0245984	F
CSbapl.93114	0.10241	0.147917	0.0130497	F
CSbapl.94321	0.0882353	0.175401	0.0152879	F
CSbapl.93116	0.0906344	8.9212	0.217071	F
CSbapl.69800	0.0803859	0	0	F
CSbapl.69801	0.733178	26.7015	0.314206	F
CSbapl.69807	0.105769	3.85928	0.149549	F
CSbapl.69805	0.0769231	0	0	F
CSbapl.65319	0.765627	0.817429	0.056515	F
CSbapl.65313	0.103291	3.41589	0.140498	F
CSbapl.63251	0.0625	0	0	F
CSbapl.63259	0.691568	1.10754	0.0705249	F
CSbapl.15360	0.753856	1.53482	0.0879875	F
CSbapl.15361	0.63881	4.99216	0.169373	F
CSbapl.15362	1	0.0395703	0.0036711	F
CSbapl.15363	0.706877	5.38318	0.175353	F
CSbapl.16949	0.0392157	0	0	F
CSbapl.16948	0.0724638	0.0828064	0.00752585	F
CSbapl.15366	0.72363	0.89855	0.0606458	F
CSbapl.16945	0.153846	0	0	F
CSbapl.15369	0.680451	1.31474	0.0793959	F
CSbapl.8139	0.713151	0.963853	0.063845	F
CSbapl.26337	0.746798	15.0922	0.262824	F
CSbapl.26330	0.2	0	0	F
CSbapl.45153	0.608696	7.59915	0.203543	F
CSbapl.66759	0.689096	0.391194	0.0312327	F
CSbapl.45151	0.2	3.8999	0.150336	F
CSbapl.45157	0.77892	3.53543	0.143025	F
CSbapl.66753	0.113636	0	0	F
CSbapl.45158	0.862694	0.373899	0.0300493	F
CSbapl.92242	0.0909091	0.362665	0.0292726	F
CSbapl.22651	0.18806	3.95884	0.151468	F
CSbapl.99011	0.0682327	2.32275	0.113592	F
CSbapl.99018	0.0642633	1.37828	0.0819573	F
CSbapl.99019	0.0863891	1.32633	0.0798684	F
CSbapl.13403	0.813692	8.65277	0.214477	F
CSbapl.50656	0.1	0	0	F
CSbapl.13401	0.797373	13.31	0.251721	F
CSbapl.13400	0.1	0.291433	0.0241936	F
CSbapl.13406	0.2	0	0	F
CSbapl.57607	0.173913	0.288512	0.0239795	F
CSbapl.57606	0.787001	13.4501	0.252643	F
CSbapl.13409	0.12069	0.0462848	0.00428014	F
CSbapl.97143	0.575	1.43328	0.0841204	F
CSbapl.58407	0.125	0	0	F
CSbapl.5559	0.532637	3.55413	0.143414	F
CSbapl.58405	0.119403	0.161265	0.0141433	F
CSbapl.5556	0.680346	7.74091	0.20509	F
CSbapl.58408	0.0612245	0	0	F
CSbapl.5552	0.166667	0	0	F
CSbapl.5550	0.125	0	0	F
CSbapl.20767	0.172288	1.15901	0.0728075	F
CSbapl.9669	0.0297872	0	0	F
CSbapl.22055	0.72392	9.24107	0.220073	F
CSbapl.22056	0.840376	47.1077	0.36642	F
CSbapl.50386	0.0769231	0.0854852	0.00775959	F
CSbapl.22050	0.689863	4.1568	0.155171	F
CSbapl.22052	0.486239	0.0600541	0.00551695	F
CSbapl.67404	0.311164	0.0708391	0.00647452	F
CSbapl.67405	0.0852941	1.57871	0.0896115	F
CSbapl.7953	0.513238	1.83039	0.0984209	F
CSbapl.7952	0.667335	9.50701	0.222498	F
CSbapl.7955	0.693312	54.8732	0.380575	F
CSbapl.67187	0.815356	4.3118	0.157972	F
CSbapl.7956	0.2	0	0	F
CSbapl.7958	0.800633	5.50514	0.177143	F
CSbapl.67408	0.114286	0.44686	0.0349441	F
CSbapl.76123	0.0566038	0.161107	0.0141304	F
CSbapl.23901	0.632681	67.9845	0.400516	F
CSbapl.23902	0.724482	7.33824	0.200628	F
CSbapl.23907	0.290532	2.19724	0.10995	F
CSbapl.18203	0.134146	0.15585	0.0137012	F
CSbapl.6394	0.849018	14.6196	0.260005	F
CSbapl.18205	0.229979	0.0230902	0.00215945	F
CSbapl.6396	0.695652	0	0	F
CSbapl.18208	0.153285	0	0	F
CSbapl.6399	0.0909091	0	0	F
CSbapl.92938	0.794231	2.83039	0.127042	F
CSbapl.92939	0.721298	0.388483	0.0310482	F
CSbapl.42311	0.08	47.6898	0.367557	F
CSbapl.42310	0.101382	0.342196	0.0278408	F
CSbapl.42313	0.116935	3.04594	0.132221	F
CSbapl.92937	0.731506	6.9721	0.19638	F
CSbapl.92930	0.683673	0.0453582	0.00419632	F
CSbapl.42314	0.0454545	0	0	F
CSbapl.92932	0.16	0	0	F
CSbapl.92933	0.138211	0.136892	0.0121367	F
CSbapl.12758	0.109453	10.4785	0.230864	F
CSbapl.12754	0.0223714	0	0	F
CSbapl.12752	0.0532351	0	0	F
CSbapl.12753	0.0342857	0	0	F
CSbapl.56552	0.688899	1.62458	0.0912796	F
CSbapl.56553	0.0641026	0	0	F
CSbapl.56550	0.222222	0	0	F
CSbapl.56556	0.0864041	0.0377367	0.00350411	F
CSbapl.56557	0.910806	9.58634	0.22321	F
CSbapl.56554	0.775886	0.525354	0.0399417	F
CSbapl.96230	0.0733945	0	0	F
CSbapl.98050	0.0930233	0	0	F
CSbapl.98055	0.49648	0.632289	0.0463514	F
CSbapl.84958	0.193431	53.5824	0.378364	F
CSbapl.98525	0.105263	0	0	F
CSbapl.10453	0.0598802	0	0	F
CSbapl.32924	0.74121	24.8168	0.30754	F
CSbapl.98526	0.0813421	0.437893	0.034356	F
CSbapl.7044	0.734507	28.0432	0.31868	F
CSbapl.32922	0.809001	3.98046	0.151879	F
CSbapl.99908	0.542768	0.522764	0.039781	F
CSbapl.99909	0.172414	1.09626	0.070017	F
CSbapl.2678	0.09375	0	0	F
CSbapl.99904	0.150442	0.0899087	0.0081443	F
CSbapl.2676	0.166667	0	0	F
CSbapl.2675	0.688942	2.00217	0.103995	F
CSbapl.99900	0.542169	0.123899	0.0110494	F
CSbapl.37417	0.2	0.129885	0.0115519	F
CSbapl.37415	0.0526316	0	0	F
CSbapl.80485	0.0898107	8.08802	0.208774	F
CSbapl.37418	0.279542	20.9739	0.292294	F
CSbapl.4631	0.886364	1.72927	0.0949795	F
CSbapl.4632	0.815246	78.6887	0.414162	F
CSbapl.4635	0.396226	12.56	0.246629	F
CSbapl.4637	0.723005	16.3781	0.270097	F
CSbapl.4639	0.760745	0.214432	0.0183781	F
CSbapl.47557	0.111111	1.50293	0.08679	F
CSbapl.80736	0.479452	0	0	F
CSbapl.40262	0.576194	2.75159	0.125075	F
CSbapl.40261	0.749622	292.292	0.537427	F
CSbapl.40260	0.0909091	0.408833	0.0324245	F
CSbapl.81283	0.666406	2.8099	0.126534	F
CSbapl.81280	0.76269	1.41866	0.0835502	F
CSbapl.44945	0.125	0	0	F
CSbapl.81287	0.650692	19.4921	0.28569	F
CSbapl.90300	0.0566038	0	0	F
CSbapl.90302	0.124827	0.219347	0.0187602	F
CSbapl.44948	0.750403	2.40425	0.115885	F
CSbapl.44949	0.0565657	0.515717	0.0393422	F
CSbapl.4097	0.155384	0	0	F
CSbapl.4096	0.204819	0.143349	0.0126725	F
CSbapl.4093	0.116992	0.11848	0.0105922	F
CSbapl.55140	0.680808	0.752751	0.0530871	F
CSbapl.55144	0.769683	0.0718554	0.00656426	F
CSbapl.55145	0.651782	0.542102	0.0409748	F
CSbapl.82394	0.0888889	0.252358	0.0212872	F
CSbapl.5943	0.311531	1.93687	0.101915	F
CSbapl.5945	0.338583	0.540919	0.0409021	F
CSbapl.27818	0.0963855	0.0212517	0.00198931	F
CSbapl.27817	0.680764	0.26944	0.0225688	F
CSbapl.27816	0.758306	8.08633	0.208756	F
CSbapl.27815	0.175141	0.0481468	0.00444834	F
CSbapl.86889	0.0909091	0	0	F
CSbapl.27810	0.829885	0.325607	0.0266643	F
CSbapl.41135	0.172699	4.30681	0.157883	F
CSbapl.41136	0.781962	6.60247	0.191889	F
CSbapl.25523	0.0759494	0.608488	0.0449619	F
CSbapl.41139	0.604932	0.503006	0.0385456	F
CSbapl.64035	0.100457	0.51539	0.0393218	F
CSbapl.79188	0.111111	34.9347	0.338822	F
CSbapl.79184	0.583281	2.60916	0.121414	F
CSbapl.79181	1	0.163866	0.014355	F
CSbapl.38092	0.0880626	20.7473	0.291314	F
CSbapl.35062	0.0545455	0	0	F
CSbapl.69808	0.2	0	0	F
CSbapl.33888	0.773474	53.954	0.379006	F
CSbapl.33883	0.0784314	0	0	F
CSbapl.33882	0.1	0	0	F
CSbapl.33885	0.154044	0.320468	0.0262969	F
CSbapl.59542	0.074502	4.34215	0.158511	F
CSbapl.33886	0.362768	1.5992	0.0903601	F
CSbapl.70377	0.113924	1.43204	0.0840722	F
CSbapl.93117	0.0895833	0.17097	0.0149307	F
CSbapl.70371	0.827586	3.69108	0.146217	F
CSbapl.94320	0.0434783	0.0471894	0.00436189	F
CSbapl.70378	0.189041	0.0461854	0.00427115	F
CSbapl.78580	0.456522	0.270925	0.0226794	F
CSbapl.78583	0.123085	1.46099	0.0851914	F
CSbapl.78585	0.743295	41.8603	0.355494	F
CSbapl.78584	0.0944756	0.125293	0.0111667	F
CSbapl.78589	0.806622	2.84291	0.127351	F
CSbapl.88035	0.2	2.21008	0.110329	F
CSbapl.88030	0.0833333	0.554029	0.0417036	F
CSbapl.88031	0.0526316	0.359377	0.0290441	F
CSbapl.53253	0.0909091	0	0	F
CSbapl.53250	0.407818	4.52346	0.161668	F
CSbapl.53251	0.433036	0.15514	0.013643	F
CSbapl.53256	0.05	0	0	F
CSbapl.60763	0.0547945	0	0	F
CSbapl.85675	0.0956938	1.43114	0.084037	F
CSbapl.52771	0.522874	0.548168	0.0413461	F
CSbapl.87910	0.126984	1.30556	0.07902	F
CSbapl.87911	0.205128	0.124112	0.0110673	F
CSbapl.87916	0.117978	0.987069	0.0649567	F
CSbapl.87918	0.0946197	0.563285	0.0422653	F
CSbapl.88699	0.700167	9.07857	0.21856	F
CSbapl.32824	0.403509	0.71704	0.0511398	F
CSbapl.32826	0.2	0	0	F
CSbapl.89344	0.0787992	4.89082	0.167759	F
CSbapl.89342	0.115965	0.0956136	0.00863817	F
CSbapl.89340	0.2	0	0	F
CSbapl.45112	0.251861	348.159	0.553921	F
CSbapl.88963	0.0714286	0	0	F
CSbapl.73053	0.111111	0	0	F
CSbapl.88966	0.0520646	0.0268775	0.00250898	F
CSbapl.88967	0.15873	0	0	F
CSbapl.88968	0.131579	0.820992	0.0567003	F
CSbapl.85518	0.784623	3.38873	0.139914	F
CSbapl.85513	0.0524017	0.110912	0.00994996	F
CSbapl.41904	0.0897436	2.71532	0.124156	F
CSbapl.41907	0.861996	1.30013	0.0787968	F
CSbapl.41901	0.676972	3.00528	0.131265	F
CSbapl.41900	0.126374	2.09549	0.10689	F
CSbapl.41903	0.764945	1.08104	0.0693277	F
CSbapl.15364	0.346154	0.585179	0.043581	F
CSbapl.41909	0.724305	2.48178	0.118015	F
CSbapl.51123	0.0892857	0.724033	0.0515243	F
CSbapl.18166	0.738619	3.98495	0.151964	F
CSbapl.43213	0.115385	0.116111	0.0103916	F
CSbapl.15161	0.836705	42.9395	0.357846	F
CSbapl.15167	0.0701754	0	0	F
CSbapl.43215	0.0656934	0.0333956	0.00310755	F
CSbapl.43214	0.0615958	0.102669	0.00924538	F
CSbapl.15168	0.0686307	0.335397	0.0273605	F
CSbapl.79977	0.742848	1.34139	0.0804787	F
CSbapl.79976	0.575973	0.351014	0.0284603	F
CSbapl.79975	0.824615	0.116625	0.0104352	F
CSbapl.79974	0.515152	2.70594	0.123917	F
CSbapl.79970	0.114504	2.48605	0.118131	F
CSbapl.19310	0.0924623	0.083639	0.00759856	F
CSbapl.19317	0.142857	0.568093	0.0425559	F
CSbapl.19316	0.0869565	0	0	F
CSbapl.37997	0.755359	5.28209	0.173843	F
CSbapl.37996	0.047817	0	0	F
CSbapl.37994	0.601098	3.48988	0.14207	F
CSbapl.37991	0.138614	0	0	F
CSbapl.73944	0.09375	0	0	F
CSbapl.73946	0.131148	0	0	F
CSbapl.73948	0.056338	0	0	F
CSbapl.242	0.701274	7.64183	0.204011	F
CSbapl.98709	0.147059	1.09195	0.0698225	F
CSbapl.246	0.189591	0	0	F
CSbapl.72098	0.133333	0	0	F
CSbapl.40744	0.133333	0	0	F
CSbapl.40746	0.0833333	0.250076	0.0211147	F
CSbapl.40742	0.0833333	0	0	F
CSbapl.97308	0.0490196	0.303071	0.0250423	F
CSbapl.14690	0.117647	0	0	F
CSbapl.14696	0.125	0	0	F
CSbapl.97301	0.05	0	0	F
CSbapl.14699	0.0588235	0	0	F
CSbapl.97305	0.0571429	0.266579	0.0223553	F
CSbapl.97307	0.0625	0	0	F
CSbapl.95236	0.0540541	0	0	F
CSbapl.95235	0.148148	0.757766	0.0533574	F
CSbapl.95232	0.0833333	0	0	F
CSbapl.95233	0.0877193	0	0	F
CSbapl.95239	0.665505	4.14821	0.155013	F
CSbapl.64229	0.112583	0	0	F
CSbapl.9062	0.548214	0.625765	0.0459726	F
CSbapl.9061	0.613805	1.60718	0.0906502	F
CSbapl.64220	0.349027	2.30381	0.113052	F
CSbapl.14343	0.111111	3.8027	0.148441	F
CSbapl.64222	0.570709	1.75279	0.0957914	F
CSbapl.64225	0.135691	6.2423	0.187298	F
CSbapl.64227	0.125	2.87898	0.128234	F
CSbapl.22291	0.441356	0.43725	0.0343137	F
CSbapl.23310	0.0657895	0	0	F
CSbapl.74321	0.606769	0.349715	0.0283693	F
CSbapl.18446	0.141791	0.797411	0.0554673	F
CSbapl.18449	0.310167	0.657591	0.0478065	F
CSbapl.72140	0.0714286	0.109316	0.00981397	F
CSbapl.75476	0.166667	0	0	F
CSbapl.75472	0.0892527	1.73814	0.0952866	F
CSbapl.71549	0.105541	5.66787	0.179481	F
CSbapl.71545	0.179487	0.0376943	0.00350024	F
CSbapl.71543	0.102564	0	0	F
CSbapl.36110	0.372699	0.233595	0.0198592	F
CSbapl.36113	0.2	0	0	F
CSbapl.98218	0.84219	0.737604	0.052266	F
CSbapl.24924	0.0741688	0.17073	0.0149112	F
CSbapl.98212	0.257669	2.37363	0.11503	F
CSbapl.24928	0.230769	0	0	F
CSbapl.98216	0.170213	0	0	F
CSbapl.98215	0.411765	0.086814	0.00787532	F
CSbapl.98214	0.52099	2.07432	0.106241	F
CSbapl.65577	0.0588235	0	0	F
CSbapl.33694	0.0793103	0.0523965	0.00483111	F
CSbapl.33695	0.0731225	0.337666	0.027521	F
CSbapl.33693	0.166667	0.0622745	0.00571489	F
CSbapl.91071	0.109244	0	0	F
CSbapl.38183	0.10039	0.670066	0.0485158	F
CSbapl.32126	0.0981781	0.786853	0.0549099	F
CSbapl.32121	0.0833333	6.78236	0.194102	F
CSbapl.32122	0.113514	0.853709	0.0583848	F
CSbapl.91079	0.0918919	0.139726	0.0123722	F
CSbapl.32129	0.0868455	3.27371	0.137402	F
CSbapl.32128	0.0983607	0.0691135	0.00632196	F
CSbapl.18296	0.0854271	0.0262619	0.00245226	F
CSbapl.23654	0.811062	31.4956	0.329305	F
CSbapl.23657	0.0997475	0	0	F
CSbapl.23651	0.739046	0.579488	0.0432408	F
CSbapl.8891	0.0519126	0	0	F
CSbapl.74704	0.0802469	1.09979	0.0701762	F
CSbapl.8895	0.0588235	0	0	F
CSbapl.42	0.08	0.0595876	0.0054753	F
CSbapl.8896	0.0666667	0	0	F
CSbapl.18998	0.11335	0	0	F
CSbapl.70639	0.142857	2.44648	0.117051	F
CSbapl.85096	0.512195	0.182031	0.01582	F
CSbapl.18990	0.0714286	0	0	F
CSbapl.70636	0.2	0.0590096	0.00542369	F
CSbapl.70635	0.107143	0.282339	0.0235251	F
CSbapl.18993	0.0810811	0	0	F
CSbapl.18994	0.118216	0.0467059	0.0043182	F
CSbapl.70632	0.130435	0	0	F
CSbapl.70631	0.820523	0.592742	0.0440313	F
CSbapl.69309	0.1	0.0242731	0.00226876	F
CSbapl.66173	0.015528	0	0	F
CSbapl.16452	0.625	0.117994	0.010551	F
CSbapl.66171	0.0576923	0	0	F
CSbapl.69304	0.783253	6.66371	0.192648	F
CSbapl.69307	0.1	0.243249	0.0205966	F
CSbapl.37839	0.629548	4.48201	0.160956	F
CSbapl.12341	0.174888	0.207515	0.0178379	F
CSbapl.12347	0.641705	5.07487	0.17067	F
CSbapl.97891	0.833333	43.3488	0.358723	F
CSbapl.97892	0.731364	1.57558	0.0894968	F
CSbapl.97893	0.142857	1.34029	0.0804342	F
CSbapl.97894	0.772727	0.116355	0.0104123	F
CSbapl.96161	0.784483	60.4047	0.389506	F
CSbapl.97897	0.106946	1.10234	0.0702912	F
CSbapl.36802	0.0754717	0.11394	0.0102075	F
CSbapl.36806	0.166667	0	0	F
CSbapl.100173	0.166667	0	0	F
CSbapl.100179	0.151515	0.0952664	0.00860818	F
CSbapl.34401	0.507422	2.52798	0.119262	F
CSbapl.34402	0.666667	0.388815	0.0310708	F
CSbapl.34403	0.786927	1.07077	0.0688599	F
CSbapl.34404	0.701493	13.3656	0.252088	F
CSbapl.28123	0.153846	0	0	F
CSbapl.34406	0.131313	4.21831	0.156292	F
CSbapl.34408	0.0329557	0.335183	0.0273453	F
CSbapl.50879	0.503704	3.97612	0.151797	F
CSbapl.20352	0.432836	0.0663536	0.00607745	F
CSbapl.95791	0.76848	3.93719	0.151054	F
CSbapl.95790	0.768421	1.52608	0.087661	F
CSbapl.95793	0.1648	3.89148	0.150174	F
CSbapl.95795	0.717521	1.47734	0.085818	F
CSbapl.95794	0.804216	0.829713	0.0571522	F
CSbapl.45015	0.0519481	0.262955	0.0220843	F
CSbapl.64764	0.0923077	0.237706	0.0201739	F
CSbapl.64766	0.288973	1.54409	0.0883331	F
CSbapl.47961	0.111732	0.185619	0.0161067	F
CSbapl.47963	0.784499	11.7346	0.240688	F
CSbapl.47965	0.814335	391.531	0.564997	F
CSbapl.47966	0.687283	12.4523	0.245875	F
CSbapl.47969	0.181818	0.044823	0.00414788	F
CSbapl.62086	0.0442708	0	0	F
CSbapl.62082	0.108904	0.102699	0.009248	F
CSbapl.62080	0.0961538	1.55832	0.0888605	F
CSbapl.67225	0.557377	2.08934	0.106702	F
CSbapl.39759	0.587384	6.04902	0.184739	F
CSbapl.67227	0.2	0.342461	0.0278595	F
CSbapl.11102	0.142857	0	0	F
CSbapl.81772	0.12	3.53301	0.142974	F
CSbapl.39757	0.0666667	0	0	F
CSbapl.67229	0.166667	0	0	F
CSbapl.39755	0.134783	0	0	F
CSbapl.90671	0.0818903	0.0259743	0.00242575	F
CSbapl.63931	0.0855385	0.488988	0.0376591	F
CSbapl.63939	0.121622	0	0	F
CSbapl.9853	0.76042	3.9473	0.151247	F
CSbapl.61687	0.681978	37.8641	0.346235	F
CSbapl.10857	0.142857	0.151003	0.0133037	F
CSbapl.10856	0.0952381	0	0	F
CSbapl.10859	0.303684	0.111402	0.00999168	F
CSbapl.10858	0.111111	0	0	F
CSbapl.9859	0.039823	0	0	F
CSbapl.61688	0.764867	2.26698	0.111991	F
CSbapl.61689	0.626259	10.6513	0.232277	F
CSbapl.62337	0.0227519	0.18491	0.0160501	F
CSbapl.62336	0.1	0.259757	0.0218444	F
CSbapl.62332	0.633459	0.476695	0.0368749	F
CSbapl.62338	0.0938053	0.260762	0.0219199	F
CSbapl.25725	0.686761	1.73995	0.0953489	F
CSbapl.25721	0.657138	0.732965	0.0520131	F
CSbapl.25720	0.81295	1.23908	0.0762519	F
CSbapl.25729	0.534833	15.4602	0.264963	F
CSbapl.63683	0.0657895	0	0	F
CSbapl.63680	0.0759494	3.98631	0.15199	F
CSbapl.96859	0.05	0	0	F
CSbapl.96856	0.555556	0.117789	0.0105337	F
CSbapl.96853	0.75	0.170066	0.0148576	F
CSbapl.96852	0.561926	0.414681	0.0328164	F
CSbapl.96851	0.180328	0.0147303	0.0013833	F
CSbapl.29658	0.164467	8.08955	0.208789	F
CSbapl.21403	0.76739	3.01152	0.131413	F
CSbapl.21400	0.76093	2.07712	0.106328	F
CSbapl.21401	0.585387	6.93585	0.195949	F
CSbapl.26845	0.132479	4.3419	0.158507	F
CSbapl.21405	0.438451	34.8183	0.338515	F
CSbapl.21409	0.1	0	0	F
CSbapl.95643	0.699086	16.844	0.2726	F
CSbapl.25899	0.773984	3.4351	0.140908	F
CSbapl.25898	0.108434	0.152867	0.0134567	F
CSbapl.25895	0.2	0	0	F
CSbapl.25894	0.04	0.042332	0.00392208	F
CSbapl.80807	0.470168	0.233346	0.0198401	F
CSbapl.25893	0.409567	7.96386	0.207472	F
CSbapl.25892	0.0944056	1.06398	0.0685492	F
CSbapl.44430	0.0833333	0	0	F
CSbapl.44431	0.111111	0.910349	0.0612319	F
CSbapl.83965	0.118644	0.485677	0.0374486	F
CSbapl.53690	0.75703	0.248822	0.0210198	F
CSbapl.60795	0.40625	0	0	F
CSbapl.60796	0.454545	0	0	F
CSbapl.40908	0.421569	0.0989579	0.00892648	F
CSbapl.60793	0.0930233	0.339185	0.0276284	F
CSbapl.60792	0.556909	2.09114	0.106757	F
CSbapl.38409	0.461538	0	0	F
CSbapl.91123	0.0909091	0	0	F
CSbapl.904	0.0979689	0.322989	0.0264774	F
CSbapl.59255	0.0933977	0.875903	0.0595106	F
CSbapl.59256	0.0738786	0.419529	0.03314	F
CSbapl.907	0.377778	0.680662	0.0491141	F
CSbapl.59251	0.166667	0	0	F
CSbapl.59252	0.623706	3.26047	0.137108	F
CSbapl.59253	0.725055	4.66152	0.164004	F
CSbapl.93328	0.679299	13.9311	0.25574	F
CSbapl.46121	0.0583942	0.0600541	0.00551695	F
CSbapl.59258	0.0526316	1.07537	0.0690698	F
CSbapl.59259	0.895032	0.836717	0.0575136	F
CSbapl.5295	0.2	0	0	F
CSbapl.8079	0.114583	0.0229879	0.00214999	F
CSbapl.53434	0.148936	0.142792	0.0126264	F
CSbapl.8073	0.43406	45.3839	0.362968	F
CSbapl.8071	0.715945	9.55929	0.222968	F
CSbapl.8077	0.117647	0	0	F
CSbapl.5299	0.111111	0	0	F
CSbapl.60246	0.799654	0.386435	0.0309085	F
CSbapl.6929	0.146341	0.0322611	0.00300364	F
CSbapl.60244	0.624403	3.85823	0.149528	F
CSbapl.54568	0.147059	4.24517	0.156778	F
CSbapl.37785	0.111111	0	0	F
CSbapl.6923	0.115385	4.48061	0.160931	F
CSbapl.6922	0.114754	21.4386	0.294274	F
CSbapl.6920	0.808981	9.04689	0.218262	F
CSbapl.27769	0.125	0.11606	0.0103873	F
CSbapl.27767	0.111111	0.2446	0.0206994	F
CSbapl.58612	0.101436	18.3532	0.28028	F
CSbapl.58611	0.0833333	0	0	F
CSbapl.58617	0.0900155	3.21625	0.136121	F
CSbapl.58616	0.166667	0.0980321	0.00884676	F
CSbapl.57600	0.150289	0.119526	0.0106806	F
CSbapl.5744	0.0740741	0	0	F
CSbapl.5741	0.0625	0	0	F
CSbapl.57602	0.218563	0.24312	0.0205868	F
CSbapl.57604	0.0571429	0.384004	0.0307425	F
CSbapl.27499	0.0625	0	0	F
CSbapl.27492	0.106667	0.761726	0.0535702	F
CSbapl.27491	0.109375	0	0	F
CSbapl.42873	0.14029	0	0	F
CSbapl.27497	0.0851064	0	0	F
CSbapl.97144	0.142857	0	0	F
CSbapl.42876	0.0943396	0	0	F
CSbapl.82983	0.142857	0.485188	0.0374174	F
CSbapl.82987	0.114583	0.0275125	0.00256747	F
CSbapl.82989	0.611075	7.71187	0.204775	F
CSbapl.45479	0.747725	8.2501	0.210446	F
CSbapl.45478	0.0605381	0.171695	0.0149892	F
CSbapl.24805	0.142857	0	0	F
CSbapl.83058	0.708942	1.87971	0.100055	F
CSbapl.45471	0.70218	21.7763	0.295687	F
CSbapl.45470	0.772198	90.93	0.42768	F
CSbapl.83057	0.827004	1.28696	0.0782535	F
CSbapl.83056	0.506525	6.37484	0.189014	F
CSbapl.45475	0.22549	0	0	F
CSbapl.45477	0.0745527	0	0	F
CSbapl.83052	0.0547945	0	0	F
CSbapl.50020	0.0740741	0	0	F
CSbapl.50022	0.125	0	0	F
CSbapl.57031	0.166667	0	0	F
CSbapl.57034	0.0473186	0	0	F
CSbapl.50029	0.680871	0.727843	0.0517331	F
CSbapl.55760	0.0447761	0	0	F
CSbapl.55762	0.0819672	0	0	F
CSbapl.17197	0.166667	0	0	F
CSbapl.6219	0.0534351	0.0289428	0.00269906	F
CSbapl.17190	0.129032	0.080168	0.00729507	F
CSbapl.17193	0.137931	0.487052	0.037536	F
CSbapl.6217	0.0362319	0	0	F
CSbapl.6216	0.652685	6.05395	0.184805	F
CSbapl.42299	0.2	0	0	F
CSbapl.42294	0.847727	5.92717	0.18309	F
CSbapl.42295	0.133333	0.0200726	0.00188002	F
CSbapl.42296	0.635907	1.87279	0.0998277	F
CSbapl.42290	0.100592	0.232483	0.0197739	F
CSbapl.42292	0.130435	0	0	F
CSbapl.42293	0.734858	2.21802	0.110563	F
CSbapl.11935	0.192593	1.98678	0.103509	F
CSbapl.11934	0.701647	150.961	0.475224	F
CSbapl.11937	0.166667	0.135086	0.0119864	F
CSbapl.11936	0.79867	76.324	0.411312	F
CSbapl.11930	0.799949	1.55422	0.0887088	F
CSbapl.11932	0.720204	4.04384	0.153075	F
CSbapl.11938	0.770196	2.98158	0.130704	F
CSbapl.17440	0.0334768	0	0	F
CSbapl.17446	0.8	0	0	F
CSbapl.53647	0.774	1.17932	0.0736932	F
CSbapl.53646	0.775859	1.57674	0.0895392	F
CSbapl.98155	0.537455	5.02187	0.169841	F
CSbapl.66127	0.0341615	0	0	F
CSbapl.98151	0.0307692	0	0	F
CSbapl.98153	0.0438596	0	0	F
CSbapl.42128	0.196319	0	0	F
CSbapl.42129	0.673845	0.210738	0.0180899	F
CSbapl.42123	0.0357143	0	0	F
CSbapl.42124	0.0836138	1.64288	0.0919369	F
CSbapl.42125	0.0248756	0	0	F
CSbapl.101347	0.131579	0.562252	0.0422028	F
CSbapl.101345	0.0909091	0	0	F
CSbapl.101343	0.0440835	0	0	F
CSbapl.101341	0.0413793	0	0	F
CSbapl.30776	0.75	0	0	F
CSbapl.30770	0.770408	1.57612	0.0895167	F
CSbapl.30771	0.635762	0.0720141	0.00657827	F
CSbapl.84911	0.254844	0.181196	0.0157531	F
CSbapl.100437	0.166667	0	0	F
CSbapl.43451	0.255835	0	0	F
CSbapl.30778	0.937659	0.0786625	0.00716313	F
CSbapl.84916	0.132353	0	0	F
CSbapl.3160	0.281071	0.119783	0.0107024	F
CSbapl.3193	0.654283	2.72254	0.12434	F
CSbapl.3194	0.471154	0.237999	0.0201963	F
CSbapl.51869	0.125	0.383384	0.0307001	F
CSbapl.51868	0.698574	2.08134	0.106457	F
CSbapl.3199	0.80902	105.172	0.441305	F
CSbapl.3198	0.770143	12.5991	0.246901	F
CSbapl.51865	0.690698	0.511293	0.0390657	F
CSbapl.51864	0.670251	0.616944	0.0454579	F
CSbapl.47519	0.125	0	0	F
CSbapl.85060	0.1	0	0	F
CSbapl.47510	0.748342	2.18814	0.10968	F
CSbapl.47511	0.145161	0.193883	0.0167638	F
CSbapl.47512	0.0815552	0.559124	0.0420132	F
CSbapl.85069	0.103448	0	0	F
CSbapl.56079	0.753888	1.44009	0.0843846	F
CSbapl.56078	0.737995	0.250825	0.0211713	F
CSbapl.56071	0.514541	1.86696	0.0996355	F
CSbapl.56070	0.656608	16.8536	0.272651	F
CSbapl.56073	0.752912	1.51195	0.0871301	F
CSbapl.56072	0.83428	49.9639	0.371876	F
CSbapl.56075	0.724402	10.1517	0.228131	F
CSbapl.56077	0.0588235	0.999749	0.0655584	F
CSbapl.43989	0.179487	0.0643855	0.00590269	F
CSbapl.43981	0.742475	3.75368	0.147471	F
CSbapl.43980	0.1	0	0	F
CSbapl.43987	0.0642202	0	0	F
CSbapl.43986	0.116334	0	0	F
CSbapl.43985	0.0677083	0	0	F
CSbapl.43984	0.102531	0	0	F
CSbapl.64654	0.2	0	0	F
CSbapl.16719	0.153846	0	0	F
CSbapl.16715	0.176471	0	0	F
CSbapl.16716	0.795656	17.9637	0.278357	F
CSbapl.72285	0.2	0.921739	0.0617942	F
CSbapl.89891	0.113208	0	0	F
CSbapl.89896	0.395	4.52086	0.161624	F
CSbapl.89894	0.681156	13.1638	0.25075	F
CSbapl.52518	0.804331	0.712687	0.0508997	F
CSbapl.52519	0.286356	0.165279	0.0144697	F
CSbapl.27496	0.132075	0.766371	0.0538193	F
CSbapl.2822	0.803215	7.55269	0.20303	F
CSbapl.37206	0.771795	55.9644	0.382405	F
CSbapl.77629	0.102362	0.0556593	0.00512394	F
CSbapl.40188	0.0714286	0	0	F
CSbapl.37200	0.0952381	0	0	F
CSbapl.77625	0.198873	0.276675	0.0231064	F
CSbapl.40187	0.0873108	0	0	F
CSbapl.40184	0.0916031	0	0	F
CSbapl.77621	0.0526316	0	0	F
CSbapl.40183	0.137652	0.146975	0.012972	F
CSbapl.40180	0.139665	0	0	F
CSbapl.67403	0.116264	3.09505	0.133362	F
CSbapl.81367	0.0996979	0.562256	0.0422031	F
CSbapl.81361	0.734987	3.43775	0.140965	F
CSbapl.81363	0.591716	0.156303	0.0137382	F
CSbapl.81362	0.755476	12.5938	0.246864	F
CSbapl.69021	0.0340909	0	0	F
CSbapl.57850	0.0486486	0.309018	0.0254731	F
CSbapl.57852	0.0707965	0	0	F
CSbapl.49375	0.0454545	5.97036	0.183678	F
CSbapl.49372	0.142857	0.162555	0.0142483	F
CSbapl.41581	0.573754	14.4164	0.258766	F
CSbapl.41583	0.0441176	0	0	F
CSbapl.41582	0.0666667	0.288218	0.0239578	F
CSbapl.80757	0.0821918	0.107405	0.00965079	F
CSbapl.45804	0.736607	1.60119	0.0904326	F
CSbapl.45807	0.125	0	0	F
CSbapl.45808	0.0666667	0	0	F
CSbapl.73888	0.0576923	0	0	F
CSbapl.71708	0.0344828	0	0	F
CSbapl.71700	0.0957447	101.288	0.437779	F
CSbapl.71701	0.25	1.2751	0.0777619	F
CSbapl.71703	0.042123	3.72029	0.146804	F
CSbapl.71704	0.050578	0.247073	0.0208871	F
CSbapl.71705	0.142857	0.0693835	0.00634585	F
CSbapl.71706	0.0382425	4.24276	0.156734	F
CSbapl.38422	0.598084	18.5345	0.281162	F
CSbapl.79579	0.733197	7.69811	0.204625	F
CSbapl.79578	0.793217	99.3065	0.435929	F
CSbapl.79573	0.805581	36.0943	0.341826	F
CSbapl.79572	0.124869	6.19717	0.186707	F
CSbapl.79571	0.650314	3.83896	0.149153	F
CSbapl.79570	0.705455	0	0	F
CSbapl.79577	0.823921	44.7823	0.361733	F
CSbapl.79575	0.775033	3.07591	0.132919	F
CSbapl.79574	0.704871	38.0396	0.346661	F
CSbapl.73636	0.670345	47.8099	0.36779	F
CSbapl.73637	0.0833333	0	0	F
CSbapl.73635	0.784322	33.143	0.333983	F
CSbapl.78620	0.0944882	22.2119	0.297479	F
CSbapl.73633	0.0625	0	0	F
CSbapl.73630	0.0649718	0.0996047	0.00898214	F
CSbapl.73631	0.0657895	0	0	F
CSbapl.43950	0.167261	0.304193	0.0251238	F
CSbapl.88872	0.210526	0	0	F
CSbapl.6393	0.0930931	0.192876	0.016684	F
CSbapl.43953	0.0915645	0.236762	0.0201018	F
CSbapl.76284	0.146444	0.145509	0.0128511	F
CSbapl.76287	0.174825	3.2539	0.136962	F
CSbapl.79601	0.142857	0	0	F
CSbapl.76282	0.817407	0.101108	0.00911137	F
CSbapl.86205	0.1	0	0	F
CSbapl.33456	0.817243	44.2301	0.360585	F
CSbapl.73580	0.0851064	0	0	F
CSbapl.33455	0.801946	3.90649	0.150464	F
CSbapl.35154	0.155172	1.16257	0.0729633	F
CSbapl.70169	0.2	0.0844166	0.00766642	F
CSbapl.33458	0.631702	1.50574	0.086896	F
CSbapl.35113	0.288462	0.130252	0.0115827	F
CSbapl.73583	0.609737	0.295048	0.0244581	F
CSbapl.32323	0.866709	0.273653	0.0228822	F
CSbapl.35114	0.186441	0	0	F
CSbapl.35117	0.166667	0	0	F
CSbapl.35116	0.0387097	0	0	F
CSbapl.35119	0.0903614	0.231105	0.019668	F
CSbapl.73584	0.690335	13.1885	0.250915	F
CSbapl.32329	0.410256	0.324536	0.0265879	F
CSbapl.35150	0.139292	1.14352	0.072126	F
CSbapl.73586	0.1	0	0	F
CSbapl.98644	0.515625	0.285611	0.0237663	F
CSbapl.24279	0.0811185	0.511149	0.0390567	F
CSbapl.87035	0.0551724	0	0	F
CSbapl.68074	0.1	0	0	F
CSbapl.79399	0.144144	2802.38	0.750973	F
CSbapl.79398	0.561245	23.4906	0.302552	F
CSbapl.79397	0.650528	1.599	0.090353	F
CSbapl.68079	0.865079	4.54007	0.161952	F
CSbapl.79395	0.728643	1.95993	0.102655	F
CSbapl.79394	0.748793	1.63023	0.091483	F
CSbapl.79391	0.803635	3.26977	0.137315	F
CSbapl.79390	0.116667	0.798828	0.0555418	F
CSbapl.26548	0.0849057	0.155846	0.0137009	F
CSbapl.54001	0.658435	9.70801	0.224291	F
CSbapl.54005	0.0454545	0.398568	0.0317328	F
CSbapl.72947	0.380952	4.86101	0.16728	F
CSbapl.72940	0.1875	0.126496	0.0112677	F
CSbapl.92936	0.802956	34.1497	0.336732	F
CSbapl.72949	0.83022	2.80682	0.126458	F
CSbapl.80918	0.125	0.8839	0.059913	F
CSbapl.42312	0.692058	100.48	0.43703	F
CSbapl.22469	0.779852	6.83956	0.194794	F
CSbapl.42317	0.823831	0.284016	0.0236488	F
CSbapl.69671	0.788043	0.64512	0.0470921	F
CSbapl.69673	0.0909091	0.0667534	0.0061129	F
CSbapl.69674	0.71996	0.915445	0.0614839	F
CSbapl.69678	0.142857	0.0748521	0.00682837	F
CSbapl.75396	0.762203	2.32394	0.113626	F
CSbapl.65161	0.153846	0	0	F
CSbapl.34243	0.125	0	0	F
CSbapl.65163	0.921131	0	0	F
CSbapl.65162	0.173554	1.19474	0.0743599	F
CSbapl.34247	0.312	0.178953	0.0155734	F
CSbapl.65168	0.860577	1.44125	0.0844297	F
CSbapl.34248	0.261579	0.435909	0.0342253	F
CSbapl.74623	0.097561	0.0817814	0.00743626	F
CSbapl.74624	0.138889	0	0	F
CSbapl.74626	0.142857	0.881513	0.0597931	F
CSbapl.74627	0.115063	13.2911	0.251596	F
CSbapl.71489	0.757549	3.13935	0.13438	F
CSbapl.74025	0.0720721	0	0	F
CSbapl.40979	0.623932	0.194107	0.0167816	F
CSbapl.40978	0.612761	0.62329	0.0458285	F
CSbapl.40971	0.52349	0	0	F
CSbapl.89130	0.0652174	0.220857	0.0188773	F
CSbapl.89135	0.0727384	0.193316	0.0167189	F
CSbapl.31148	0.181818	0	0	F
CSbapl.31149	0.166667	0	0	F
CSbapl.89139	0.74498	3.07658	0.132935	F
CSbapl.20032	0.153846	0.23586	0.0200328	F
CSbapl.41553	0.0408163	0.665952	0.0482825	F
CSbapl.41550	0.117647	0	0	F
CSbapl.25007	0.0507614	6.65277	0.192513	F
CSbapl.95805	0.1	7.18166	0.198835	F
CSbapl.95804	0.111111	0	0	F
CSbapl.95807	0.0869565	0.0425256	0.00393965	F
CSbapl.95806	0.2	0	0	F
CSbapl.95809	0.0437956	0	0	F
CSbapl.95808	0.0869565	0.615069	0.0453481	F
CSbapl.30890	0.41	2.80133	0.126321	F
CSbapl.30897	0.114286	0.171362	0.0149623	F
CSbapl.30896	0.108911	0.728355	0.0517611	F
CSbapl.82361	0.830357	338.225	0.55119	F
CSbapl.25008	0.0503597	0.144617	0.0127773	F
CSbapl.76918	0.102941	0	0	F
CSbapl.54349	0.11145	0.349321	0.0283417	F
CSbapl.76917	0.649481	2.58594	0.120803	F
CSbapl.76912	0.857143	0	0	F
CSbapl.19878	0.0555556	0	0	F
CSbapl.15074	0.21872	1.78435	0.0968697	F
CSbapl.29291	0.0909091	0.490867	0.0377784	F
CSbapl.19870	0.0877743	0.196013	0.0169324	F
CSbapl.19871	0.0723982	0	0	F
CSbapl.19872	0.162162	0	0	F
CSbapl.73392	0.0973896	0.611767	0.0451545	F
CSbapl.19874	0.11245	0	0	F
CSbapl.19876	0.0634921	0.563189	0.0422596	F
CSbapl.19877	0.142857	0.546843	0.0412651	F
CSbapl.15070	0.479452	114.6	0.449353	F
CSbapl.60464	0.66912	3.88213	0.149993	F
CSbapl.30234	0.73082	7.16221	0.19861	F
CSbapl.30233	0.792358	36.7894	0.343582	F
CSbapl.85307	0.0967742	0.119176	0.0106511	F
CSbapl.85304	0.804391	9.33545	0.220941	F
CSbapl.85301	0.100737	1.23067	0.075896	F
CSbapl.51372	0.078125	0	0	F
CSbapl.19294	0.73961	17.9839	0.278457	F
CSbapl.19290	0.0952381	0	0	F
CSbapl.19291	0.111607	92.6021	0.429385	F
CSbapl.19292	0.0967742	3.3607	0.139308	F
CSbapl.15730	0.210526	0	0	F
CSbapl.15737	0.0892308	0	0	F
CSbapl.15736	0.841996	0.659406	0.04791	F
CSbapl.15735	0.109792	6.41481	0.189525	F
CSbapl.48544	0.0508475	0	0	F
CSbapl.15738	0.124357	0.0213888	0.002002	F
CSbapl.48543	0.0576923	0	0	F
CSbapl.48540	0.04	0	0	F
CSbapl.48541	0.0909091	0.134041	0.0118992	F
CSbapl.51378	0.676606	28.2755	0.319434	F
CSbapl.12962	0.793375	2.81524	0.126667	F
CSbapl.19128	0.1	0	0	F
CSbapl.19122	0.143369	0.149133	0.0131498	F
CSbapl.19121	0.494387	6.34793	0.188668	F
CSbapl.19126	0.102564	0.047435	0.00438408	F
CSbapl.1620	0.112	0.426045	0.0335733	F
CSbapl.1623	0.108312	0.517249	0.0394378	F
CSbapl.1624	0.318302	3.1184	0.1339	F
CSbapl.1626	0.0553506	1.15123	0.0724657	F
CSbapl.72111	0.69562	2.2604	0.111801	F
CSbapl.72113	0.784644	69.6169	0.402729	F
CSbapl.9452	0.121951	0	0	F
CSbapl.72117	0.816327	4.41967	0.159874	F
CSbapl.72118	0.795419	7.62113	0.203784	F
CSbapl.72119	0.891892	1.37636	0.0818811	F
CSbapl.9458	0.742857	0.621592	0.0457294	F
CSbapl.65985	0.115385	0.441	0.0345602	F
CSbapl.72982	0.845528	0.666746	0.0483275	F
CSbapl.65989	0.0857143	0	0	F
CSbapl.14068	0.142857	0	0	F
CSbapl.97519	0.262626	4.74608	0.165406	F
CSbapl.58059	0.78412	2.40535	0.115915	F
CSbapl.58058	0.737303	20.206	0.288929	F
CSbapl.58055	0.224189	0.145697	0.0128665	F
CSbapl.97513	0.111111	0	0	F
CSbapl.58056	0.125971	8.64893	0.214439	F
CSbapl.97515	0.477021	4.22661	0.156443	F
CSbapl.97514	0.130435	0	0	F
CSbapl.58053	0.0636364	0	0	F
CSbapl.36309	0.0674603	0	0	F
CSbapl.36308	0.0597015	0	0	F
CSbapl.39179	0.181818	0.347615	0.028222	F
CSbapl.39178	0.787745	10.4194	0.230376	F
CSbapl.33157	0.285714	0.0853651	0.00774912	F
CSbapl.39172	0.83023	0.680405	0.0490996	F
CSbapl.96640	0.0420561	0	0	F
CSbapl.39170	0.774662	0.156416	0.0137475	F
CSbapl.39177	0.0625	0.119646	0.0106907	F
CSbapl.36304	0.2	0	0	F
CSbapl.96644	0.317629	0.733725	0.0520546	F
CSbapl.39174	0.273792	0.304462	0.0251432	F
CSbapl.782	0.85	0.522957	0.039793	F
CSbapl.783	0.720265	7.03389	0.197111	F
CSbapl.781	0.80311	18.4835	0.280915	F
CSbapl.787	0.783148	5.69997	0.179935	F
CSbapl.785	0.680533	14.1554	0.257151	F
CSbapl.789	0.735787	15.0173	0.262384	F
CSbapl.91917	0.808951	21.5421	0.294709	F
CSbapl.91916	0.0654253	0.266296	0.0223342	F
CSbapl.91912	0.0782609	0.0444432	0.00411349	F
CSbapl.22484	0.0709166	0.0379075	0.00351967	F
CSbapl.22483	0.352657	0.15257	0.0134323	F
CSbapl.22481	0.166667	0	0	F
CSbapl.22480	0.160839	0	0	F
CSbapl.67857	0.0535714	0	0	F
CSbapl.7504	0.131148	0.109528	0.00983198	F
CSbapl.7503	0.12	0.809442	0.0560983	F
CSbapl.67859	0.0849057	0.349773	0.0283733	F
CSbapl.17609	0.09375	0	0	F
CSbapl.17607	0.1	0.0595876	0.0054753	F
CSbapl.10452	0.131579	0	0	F
CSbapl.24885	0.0684039	0	0	F
CSbapl.24887	0.127308	0.301398	0.0249208	F
CSbapl.24886	0.109937	1.28331	0.0781023	F
CSbapl.24881	0.0684211	0.0133759	0.00125694	F
CSbapl.24880	0.633488	0.344919	0.0280326	F
CSbapl.29871	0.0930233	0.252207	0.0212758	F
CSbapl.29870	0.113904	0.681877	0.0491824	F
CSbapl.13775	0.109589	0	0	F
CSbapl.98394	0.166667	0	0	F
CSbapl.13771	0.0327056	0.042244	0.00391409	F
CSbapl.13770	0.026178	0.0844166	0.00766642	F
CSbapl.13772	0.2	0	0	F
CSbapl.22734	0.208035	0.192392	0.0166456	F
CSbapl.22736	0.307304	1.49071	0.086327	F
CSbapl.22731	0.2	0.286548	0.0238351	F
CSbapl.22732	0.448539	2.3736	0.115029	F
CSbapl.101109	0.263314	1.00543	0.0658268	F
CSbapl.38220	0.124031	1.99855	0.103881	F
CSbapl.24776	0.0769231	5.20141	0.17262	F
CSbapl.24775	0.0666667	2.08594	0.106598	F
CSbapl.38223	0.134335	2.83623	0.127186	F
CSbapl.35653	0.0526316	1.30116	0.078839	F
CSbapl.35650	0.0704225	0	0	F
CSbapl.61180	0.681317	23.9253	0.304216	F
CSbapl.35656	0.0983607	0	0	F
CSbapl.38229	0.0671378	0.911512	0.0612895	F
CSbapl.94730	0.097561	0	0	F
CSbapl.94731	0.114754	0.452218	0.0352937	F
CSbapl.80212	0.0724638	0	0	F
CSbapl.94735	0.167161	18.0375	0.278725	F
CSbapl.59695	0.736626	1.39232	0.0825142	F
CSbapl.94739	0.836418	19.7906	0.287057	F
CSbapl.80219	0.0642202	0.794509	0.0553144	F
CSbapl.46912	0.523438	0.136079	0.012069	F
CSbapl.46917	0.52127	10.2216	0.228723	F
CSbapl.46916	0.137931	6.1182	0.185663	F
CSbapl.46915	0.860697	5.83591	0.181835	F
CSbapl.46914	0.887139	4.05699	0.153322	F
CSbapl.66991	0.138889	0	0	F
CSbapl.72754	0.687128	7.13084	0.198245	F
CSbapl.11609	0.754763	23.5597	0.302818	F
CSbapl.60858	0.699613	6.26615	0.187609	F
CSbapl.60859	0.105263	0	0	F
CSbapl.11603	0.142857	0.276558	0.0230977	F
CSbapl.60857	0.718133	5.78547	0.181135	F
CSbapl.11607	0.138158	1.78471	0.0968818	F
CSbapl.60853	0.10084	0	0	F
CSbapl.11604	0.0465116	0	0	F
CSbapl.3973	0.721211	7.76979	0.205402	F
CSbapl.10955	0.768898	24.7852	0.307424	F
CSbapl.3971	0.0578035	0	0	F
CSbapl.10950	0.747361	4.42519	0.15997	F
CSbapl.10951	0.752151	4.59302	0.162852	F
CSbapl.10953	0.756836	15.7125	0.266403	F
CSbapl.61727	0.127451	1.98953	0.103596	F
CSbapl.91488	0.0909091	0	0	F
CSbapl.61725	0.0322234	0.0641139	0.00587854	F
CSbapl.3978	0.831111	0.186918	0.0162103	F
CSbapl.61722	0.126984	0	0	F
CSbapl.61721	0.0232558	0	0	F
CSbapl.61720	0.138249	0.0879626	0.00797524	F
CSbapl.93420	0.803324	29.139	0.322184	F
CSbapl.93423	0.764766	3.51587	0.142616	F
CSbapl.93422	0.742209	8.81483	0.216052	F
CSbapl.93426	0.317221	0.683882	0.0492951	F
CSbapl.93429	0.0601504	0	0	F
CSbapl.69533	0.756596	0.887262	0.0600817	F
CSbapl.69530	0.333333	0.0180678	0.00169392	F
CSbapl.69531	0.607815	3.15191	0.134667	F
CSbapl.69537	0.421053	0	0	F
CSbapl.69534	0.657471	0.167897	0.014682	F
CSbapl.28087	0.0675676	0.500612	0.0383948	F
CSbapl.81165	0.0893953	23.5093	0.302624	F
CSbapl.65123	0.774502	13.0789	0.250181	F
CSbapl.81160	0.346425	27.5532	0.317071	F
CSbapl.81169	0.0782123	0	0	F
CSbapl.21285	0.714456	22.2675	0.297705	F
CSbapl.39348	0.680267	0.618096	0.0455253	F
CSbapl.55705	0.157895	0.0516836	0.00476701	F
CSbapl.90735	0.056338	0	0	F
CSbapl.90736	0.123077	0	0	F
CSbapl.90737	0.644096	18.7647	0.282271	F
CSbapl.90730	0.102564	0	0	F
CSbapl.90731	0.136558	5.81147	0.181496	F
CSbapl.90738	0.123457	0.0281042	0.00262193	F
CSbapl.90739	0.848101	0.0783247	0.0071335	F
CSbapl.21612	0.059633	0	0	F
CSbapl.21611	0.125	1.70622	0.0941773	F
CSbapl.93281	0.843634	1.99126	0.10365	F
CSbapl.21616	0.141414	0	0	F
CSbapl.21615	0.0447761	0	0	F
CSbapl.93282	0.695883	2.80867	0.126504	F
CSbapl.5653	0.0676746	0.0402767	0.00373536	F
CSbapl.92772	0.0959596	0.0168902	0.00158444	F
CSbapl.92776	0.717856	0.921096	0.0617626	F
CSbapl.67070	0.476744	1.61587	0.0909652	F
CSbapl.92774	0.689148	0.273695	0.0228853	F
CSbapl.92775	0.558426	0.289888	0.0240804	F
CSbapl.92778	0.762065	1.3355	0.0802405	F
CSbapl.67078	0.770082	0.174877	0.0152457	F
CSbapl.90886	0.853485	18.8254	0.282561	F
CSbapl.90887	1	0.301416	0.0249221	F
CSbapl.63762	0.142857	0	0	F
CSbapl.90889	0.15625	0.0616725	0.00566126	F
CSbapl.63768	0.0737705	0.03342	0.00310978	F
CSbapl.53022	0.591038	28.2568	0.319373	F
CSbapl.53024	0.0327103	0	0	F
CSbapl.53029	0.0393285	9.77217	0.224856	F
CSbapl.92488	0.837617	7.57945	0.203326	F
CSbapl.57910	0.809068	22.909	0.300278	F
CSbapl.57912	0.773585	9.0043	0.21786	F
CSbapl.21922	0.242291	0	0	F
CSbapl.92484	0.7039	104.879	0.441044	F
CSbapl.92485	0.736652	54.5892	0.380093	F
CSbapl.92486	0.772813	20.0907	0.288413	F
CSbapl.92487	0.0792683	0.993504	0.0652626	F
CSbapl.25912	0.111314	0.0484949	0.00447975	F
CSbapl.25919	0.789548	7.5021	0.202469	F
CSbapl.29020	0.731494	3.29805	0.137939	F
CSbapl.29023	0.352941	0	0	F
CSbapl.29024	0.674882	1.59453	0.0901903	F
CSbapl.86309	0.120865	0.18968	0.0164302	F
CSbapl.86306	0.0793651	6.89688	0.195484	F
CSbapl.29029	0.75538	5.58643	0.178318	F
CSbapl.86303	0.2	0.502072	0.0384868	F
CSbapl.27518	0.198868	0.176573	0.0153822	F
CSbapl.27516	0.226667	0.434286	0.0341183	F
CSbapl.27512	0.0791506	0.963242	0.0638155	F
CSbapl.44663	0.0361446	0	0	F
CSbapl.44661	0.0625	0	0	F
CSbapl.44660	0.0237342	0	0	F
CSbapl.44667	0.0272953	0	0	F
CSbapl.44666	0.0512821	0	0	F
CSbapl.44669	0.0239808	0	0	F
CSbapl.44668	0.0240964	0	0	F
CSbapl.99702	0.749274	10.7059	0.232719	F
CSbapl.45399	0.0860215	0	0	F
CSbapl.54247	0.0289855	0	0	F
CSbapl.99704	0.748818	9.12506	0.218995	F
CSbapl.54243	0.111111	0	0	F
CSbapl.45390	0.646543	24.9184	0.307912	F
CSbapl.99708	0.111913	0.779562	0.0545231	F
CSbapl.45394	0.106667	20.3123	0.289402	F
CSbapl.54249	0.0425532	0	0	F
CSbapl.45396	0.15	0	0	F
CSbapl.32551	0.706096	0.485712	0.0374508	F
CSbapl.42629	0.11215	5.71503	0.180147	F
CSbapl.42621	0.774612	9.92749	0.22621	F
CSbapl.42624	0.2	0	0	F
CSbapl.5469	0.715933	20.4315	0.28993	F
CSbapl.5468	0.0517241	0.49645	0.038132	F
CSbapl.88411	0.162162	0.202216	0.0174218	F
CSbapl.5463	0.0979167	6.16447	0.186276	F
CSbapl.5461	0.734491	40.9482	0.353459	F
CSbapl.5460	0.0764951	5.29728	0.174071	F
CSbapl.5467	0.734959	42.3535	0.356576	F
CSbapl.5465	0.815685	9.02455	0.218052	F
CSbapl.51542	0.693582	17.6599	0.276829	F
CSbapl.51545	0.735771	1.0759	0.0690939	F
CSbapl.66849	0.363636	3.62274	0.144828	F
CSbapl.66847	0.43838	0.772579	0.0541512	F
CSbapl.66844	0.153846	1.05862	0.0683031	F
CSbapl.66843	0.747664	6.50621	0.190684	F
CSbapl.66841	0.0881295	6.09175	0.185311	F
CSbapl.66840	0.103093	14.8999	0.261687	F
CSbapl.57263	0.503432	3.10288	0.133543	F
CSbapl.57267	0.0185918	0.0229837	0.0021496	F
CSbapl.57266	0.0736461	1.06507	0.0685988	F
CSbapl.57265	0.121019	0.0552545	0.00508766	F
CSbapl.57264	0.742488	7.34375	0.200691	F
CSbapl.57268	0.0263852	0.0513115	0.00473353	F
CSbapl.52085	0.1	0	0	F
CSbapl.50421	0.1	0.543449	0.0410573	F
CSbapl.56799	0.0952381	0.0825814	0.00750619	F
CSbapl.28868	0.276923	0.836622	0.0575087	F
CSbapl.28866	0.591549	0.0813902	0.00740205	F
CSbapl.28865	0.59436	0.416363	0.0329288	F
CSbapl.56794	0.693555	0.460862	0.0358551	F
CSbapl.28862	0.153846	6.01333	0.184259	F
CSbapl.28861	0.0807175	3.17484	0.135188	F
CSbapl.81945	0.824444	0.838751	0.0576183	F
CSbapl.81479	0.074883	32.4008	0.331904	F
CSbapl.81947	0.632319	1.24817	0.0766352	F
CSbapl.45539	0.784345	6.51127	0.190748	F
CSbapl.28552	0.2	0	0	F
CSbapl.45534	0.057971	0	0	F
CSbapl.45535	0.0299728	0	0	F
CSbapl.45536	0.047619	0	0	F
CSbapl.45537	0.0294334	0.0210345	0.00196918	F
CSbapl.81949	0.696382	5.37434	0.175222	F
CSbapl.55998	0.078125	0	0	F
CSbapl.31300	0.6918	21.1582	0.293084	F
CSbapl.31301	0.172414	0	0	F
CSbapl.31307	0.0680851	2.34759	0.114297	F
CSbapl.13822	0.0327869	0	0	F
CSbapl.2168	0.2	0	0	F
CSbapl.2167	0.111712	0	0	F
CSbapl.81473	0.730769	38.6192	0.348055	F
CSbapl.2161	0.2	0.546306	0.0412323	F
CSbapl.2160	0.12	0.550579	0.0414933	F
CSbapl.84279	0.137712	0.736578	0.0522102	F
CSbapl.28558	0.602399	1.56872	0.0892444	F
CSbapl.55688	0.1	0.990137	0.0651026	F
CSbapl.56139	0.111111	0	0	F
CSbapl.55535	0.145833	0	0	F
CSbapl.76668	0.100775	0	0	F
CSbapl.2784	0.220779	0.0498023	0.00459764	F
CSbapl.84899	0.0989505	0.934845	0.0624372	F
CSbapl.86125	0.109061	9.44793	0.221965	F
CSbapl.89449	0.0833652	6.27883	0.187774	F
CSbapl.78984	0.0674157	0.868609	0.0591421	F
CSbapl.78981	0.673695	11.2077	0.23669	F
CSbapl.78983	0.524862	11.6648	0.240168	F
CSbapl.78982	0.776377	2.01005	0.104243	F
CSbapl.48708	0.769942	16.4246	0.27035	F
CSbapl.48709	0.773819	25.9425	0.311578	F
CSbapl.3783	0.0714286	0.047783	0.0044155	F
CSbapl.3784	0.0987654	0.230227	0.0196006	F
CSbapl.3788	0.110422	90.6336	0.427374	F
CSbapl.48701	0.833374	37.0999	0.344356	F
CSbapl.48702	0.764452	8.30815	0.211038	F
CSbapl.48706	0.730946	4.18548	0.155695	F
CSbapl.47701	0.130435	0.0923607	0.00835689	F
CSbapl.40571	0.332689	0.0925696	0.00837498	F
CSbapl.47702	0.102941	0	0	F
CSbapl.47705	0.166667	0	0	F
CSbapl.47704	0.0864198	0	0	F
CSbapl.40575	0.712889	1.89982	0.100714	F
CSbapl.40574	0.78271	2.1529	0.108629	F
CSbapl.41626	0.219917	0	0	F
CSbapl.41620	0.103448	0	0	F
CSbapl.41622	0.0839695	0	0	F
CSbapl.72352	0.157729	0.114378	0.0102446	F
CSbapl.72353	0.194165	1.33268	0.0801262	F
CSbapl.72351	0.182948	1.83628	0.0986178	F
CSbapl.4789	0.0909091	0.292401	0.0242646	F
CSbapl.77187	0.0909091	0	0	F
CSbapl.4787	0.166667	0	0	F
CSbapl.72359	0.153846	1.28086	0.0780009	F
CSbapl.4781	0.176471	0.203706	0.0175389	F
CSbapl.4783	0.0769231	1.48549	0.0861287	F
CSbapl.68913	0.0991285	0.185989	0.0161363	F
CSbapl.68912	0.681526	25.6322	0.310482	F
CSbapl.68910	0.791802	12.1535	0.243749	F
CSbapl.37070	0.0888889	0.884559	0.0599461	F
CSbapl.40399	0.0510949	0.483539	0.0373123	F
CSbapl.37077	0.14	0.0801072	0.00728975	F
CSbapl.37078	0.727877	4.38175	0.15921	F
CSbapl.37079	0.2	0.895952	0.0605163	F
CSbapl.4257	0.552695	1.85842	0.0993534	F
CSbapl.4256	0.214286	0.271057	0.0226892	F
CSbapl.4255	0.732516	8.05915	0.208473	F
CSbapl.4254	0.0833333	0.203873	0.0175521	F
CSbapl.4253	0.0526316	0	0	F
CSbapl.4252	0.0909091	0	0	F
CSbapl.4250	0.129032	0.0440434	0.00407727	F
CSbapl.74197	0.64932	72.1281	0.406034	F
CSbapl.74193	0.0555556	3.35934	0.139279	F
CSbapl.33791	0.819006	11.3005	0.237407	F
CSbapl.33792	0.800474	3.74879	0.147373	F
CSbapl.33794	0.164865	1.72198	0.0947266	F
CSbapl.74198	0.134286	0	0	F
CSbapl.70864	0.0409836	2.19857	0.109989	F
CSbapl.70863	0.147541	0	0	F
CSbapl.70860	0.162791	0	0	F
CSbapl.10144	0.283333	0	0	F
CSbapl.36671	0.733445	10.5125	0.231144	F
CSbapl.36670	0.753515	6.73811	0.193562	F
CSbapl.36672	0.12	69.4095	0.402451	F
CSbapl.17269	0.781601	5.24457	0.173276	F
CSbapl.17267	0.711097	2.43535	0.116745	F
CSbapl.90306	0.0756098	0.885054	0.059971	F
CSbapl.71119	0.117647	0	0	F
CSbapl.71118	0.2327	1.16616	0.07312	F
CSbapl.71111	0.0403587	0	0	F
CSbapl.71110	0.0555556	0	0	F
CSbapl.76325	0.252577	0.0494388	0.00456488	F
CSbapl.71112	0.0597015	0.15659	0.0137617	F
CSbapl.71117	0.333333	0	0	F
CSbapl.70249	0.902314	0.97315	0.0642917	F
CSbapl.24578	0.117647	0	0	F
CSbapl.24574	0.857809	4.402	0.159565	F
CSbapl.70240	0.629064	6.31515	0.188245	F
CSbapl.24576	0.0864979	0.226974	0.0193501	F
CSbapl.70244	0.820093	26.3676	0.313059	F
CSbapl.24572	0.76371	4.30902	0.157923	F
CSbapl.64118	0.0825688	0	0	F
CSbapl.78470	0.116592	0	0	F
CSbapl.64113	0.0790378	0.184122	0.0159872	F
CSbapl.64112	0.15	2.05132	0.105531	F
CSbapl.64111	0.82754	142.697	0.469934	F
CSbapl.64110	0.115385	0	0	F
CSbapl.9200	0.742769	2.39534	0.115637	F
CSbapl.9206	0.0597015	0.162344	0.0142312	F
CSbapl.88188	0.67422	1.95104	0.10237	F
CSbapl.73579	0.103543	127.928	0.459676	F
CSbapl.35323	0.0566038	0	0	F
CSbapl.35326	0.181818	0	0	F
CSbapl.35327	0.148148	0	0	F
CSbapl.35324	0.0566038	0	0	F
CSbapl.35325	0.166667	0.0377047	0.00350119	F
CSbapl.75741	0.06	0.0621472	0.00570354	F
CSbapl.75742	0.0740741	0	0	F
CSbapl.75747	0.252879	0	0	F
CSbapl.87203	0.780804	2.48543	0.118114	F
CSbapl.87204	0.751799	32.9369	0.333411	F
CSbapl.87205	0.771084	0.6708	0.0485574	F
CSbapl.87206	0.131579	0.464675	0.0361017	F
CSbapl.87207	0.125	0	0	F
CSbapl.87208	0.814401	83.3518	0.419541	F
CSbapl.87209	0.16	2.0853	0.106579	F
CSbapl.88452	0.616479	1.30711	0.0790835	F
CSbapl.88459	0.0252101	0.146975	0.012972	F
CSbapl.69734	0.0810811	0.58888	0.0438016	F
CSbapl.69735	0.161108	0	0	F
CSbapl.69736	0.0681818	0.304964	0.0251796	F
CSbapl.75303	0.0980392	0.080168	0.00729507	F
CSbapl.69730	0.677841	3.60585	0.144482	F
CSbapl.69731	0.117647	0.781135	0.0546067	F
CSbapl.69733	0.109635	0.0791405	0.00720504	F
CSbapl.69739	0.0789474	0.740715	0.0524352	F
CSbapl.62617	0.794118	0.0859236	0.00779779	F
CSbapl.62610	0.629096	0.0360663	0.00335171	F
CSbapl.75307	0.0895522	5.10842	0.171191	F
CSbapl.65648	0.105673	2.15348	0.108646	F
CSbapl.62618	0.142857	0	0	F
CSbapl.62619	0.121042	0.015452	0.00145055	F
CSbapl.69881	0.783432	13.4788	0.252831	F
CSbapl.69884	0.0694444	7.46835	0.202093	F
CSbapl.67325	0.1	0	0	F
CSbapl.65391	0.133333	0	0	F
CSbapl.65394	0.439815	0.338062	0.027549	F
CSbapl.71411	0.351695	2.37143	0.114968	F
CSbapl.76741	0.240506	0.110109	0.00988149	F
CSbapl.11049	0.651262	3.61378	0.144645	F
CSbapl.30918	0.731801	0.619701	0.045619	F
CSbapl.30919	0.461422	0.28154	0.0234662	F
CSbapl.30917	0.736119	12.8056	0.248326	F
CSbapl.82396	0.0212215	0	0	F
CSbapl.13958	0.0882353	0	0	F
CSbapl.29807	0.166667	0.0881848	0.00799456	F
CSbapl.13956	0.12963	0	0	F
CSbapl.29802	0.166667	0.0384683	0.00357077	F
CSbapl.30158	0.742935	32.8064	0.333046	F
CSbapl.19782	0.0372671	0	0	F
CSbapl.20984	0.14955	0.751232	0.0530051	F
CSbapl.20985	0.843543	3.58033	0.143956	F
CSbapl.20987	0.82735	2.51239	0.118843	F
CSbapl.19629	0.307692	0.592783	0.0440337	F
CSbapl.21055	0.0841121	0.573813	0.0429003	F
CSbapl.8205	0.06	1.02404	0.0667006	F
CSbapl.21057	0.0431373	0.556932	0.0418801	F
CSbapl.19622	0.091738	1.211	0.0750583	F
CSbapl.19625	0.137931	0	0	F
CSbapl.19627	0.583245	13.5859	0.253527	F
CSbapl.21052	0.747403	0.260288	0.0218843	F
CSbapl.14459	0.0904437	0.119646	0.0106907	F
CSbapl.64938	0.107843	0	0	F
CSbapl.13488	0.669143	7.18631	0.198889	F
CSbapl.9555	0.712593	4.21243	0.156186	F
CSbapl.13483	0.95082	3.09377	0.133333	F
CSbapl.14450	0.457903	1.06454	0.0685746	F
CSbapl.64933	0.518325	3.92068	0.150737	F
CSbapl.13480	0.0655738	0.221825	0.0189522	F
CSbapl.13487	0.9	0.753584	0.053132	F
CSbapl.14454	0.0909091	4.30361	0.157826	F
CSbapl.14456	0.843856	7.32691	0.2005	F
CSbapl.15326	0.0843091	0	0	F
CSbapl.38857	0.109211	32.8476	0.333162	F
CSbapl.38855	0.111111	0.440951	0.0345569	F
CSbapl.38854	0.2	0.594646	0.0441443	F
CSbapl.38850	0.133333	0.101546	0.00914901	F
CSbapl.38858	0.124138	0	0	F
CSbapl.27066	0.0869565	1.68454	0.0934162	F
CSbapl.42428	0.125	0.0887502	0.00804371	F
CSbapl.97498	0.779834	19.2167	0.284409	F
CSbapl.27063	0.81324	8.22427	0.210181	F
CSbapl.27060	0.1875	0	0	F
CSbapl.27061	0.788485	4.36552	0.158924	F
CSbapl.97497	0.238532	0.304115	0.0251181	F
CSbapl.97490	0.442308	1.63258	0.0915674	F
CSbapl.27068	0.0988372	1.48958	0.0862841	F
CSbapl.97493	0.27821	0	0	F
CSbapl.23981	0.0590034	0.179694	0.0156328	F
CSbapl.15508	0.536568	0.664693	0.0482109	F
CSbapl.23987	0.0785908	0	0	F
CSbapl.15504	0.752244	15.8659	0.267267	F
CSbapl.15502	0.746421	0.201106	0.0173344	F
CSbapl.15503	0.833293	28.4312	0.319935	F
CSbapl.59539	0.0526316	0.0962937	0.00869687	F
CSbapl.59538	0.146067	0.26736	0.0224137	F
CSbapl.1789	0.0930233	0.0573805	0.00527805	F
CSbapl.1787	0.0380952	0	0	F
CSbapl.1784	0.0377834	0	0	F
CSbapl.1785	0.0487805	0	0	F
CSbapl.1782	0.0721245	12.3934	0.245459	F
CSbapl.59533	0.125	3.5018	0.14232	F
CSbapl.42390	0.104666	0	0	F
CSbapl.42393	0.15	0	0	F
CSbapl.97729	0.166667	0	0	F
CSbapl.42395	0.117647	3.65087	0.145402	F
CSbapl.42396	0.0943396	0	0	F
CSbapl.42398	0.133333	0	0	F
CSbapl.97726	0.660484	4.18233	0.155638	F
CSbapl.97727	0.553432	1.81256	0.0978234	F
CSbapl.97724	0.227642	29.2442	0.322513	F
CSbapl.10367	0.142857	0	0	F
CSbapl.10366	0.0993377	0.229824	0.0195696	F
CSbapl.73501	0.0257732	0	0	F
CSbapl.10362	0.0428571	0.166065	0.0145336	F
CSbapl.32320	0.751186	0.515048	0.0393005	F
CSbapl.6067	0.772046	0.634807	0.0464972	F
CSbapl.6065	0.751737	11.2039	0.236661	F
CSbapl.18176	0.668766	22.9914	0.300603	F
CSbapl.18177	0.600626	6.11691	0.185646	F
CSbapl.18174	0.12039	0.420045	0.0331744	F
CSbapl.18178	0.2	2.91758	0.129171	F
CSbapl.6069	0.781041	12.2852	0.244692	F
CSbapl.7337	0.142857	0.148275	0.0130792	F
CSbapl.7332	0.655428	6.04899	0.184739	F
CSbapl.7338	0.1	0.0503156	0.00464388	F
CSbapl.23364	0.0856855	2.30531	0.113095	F
CSbapl.23367	0.0526316	0	0	F
CSbapl.23361	0.1	0	0	F
CSbapl.60134	0.8	0.365643	0.0294791	F
CSbapl.60136	0.086785	3.96558	0.151596	F
CSbapl.60131	0.32243	2.54207	0.119639	F
CSbapl.60130	0.267623	1.57239	0.0893794	F
CSbapl.60132	0.731596	2.58284	0.120722	F
CSbapl.628	0.105263	0.0645715	0.00591922	F
CSbapl.18281	0.2	0	0	F
CSbapl.95380	0.779351	1.01969	0.0664971	F
CSbapl.622	0.108108	0.0428519	0.00396925	F
CSbapl.625	0.825641	1.68681	0.0934963	F
CSbapl.95387	0.138976	0	0	F
CSbapl.95384	0.939699	5.12025	0.171374	F
CSbapl.626	0.586355	0.16852	0.0147325	F
CSbapl.91898	0.602985	2.09333	0.106825	F
CSbapl.91899	0.0736342	0.179199	0.0155931	F
CSbapl.34808	0.0833333	0	0	F
CSbapl.34804	0.142857	0	0	F
CSbapl.56	0.897727	0.540979	0.0409058	F
CSbapl.91891	0.473925	2.24349	0.111309	F
CSbapl.91896	0.0832095	0.871934	0.0593103	F
CSbapl.52	0.0947368	0	0	F
CSbapl.50	0.0526316	0.535807	0.0405878	F
CSbapl.26858	0.166667	0	0	F
CSbapl.99985	0.116173	0.155585	0.0136795	F
CSbapl.99981	0.279045	0.0389615	0.00361569	F
CSbapl.26850	0.0769231	1.05123	0.0679627	F
CSbapl.26852	0.745785	0.316929	0.026043	F
CSbapl.99988	0.117647	0.539625	0.0408227	F
CSbapl.99989	0.0387097	0	0	F
CSbapl.83976	0.0813953	0.120915	0.0107979	F
CSbapl.33125	0.0726546	0.596771	0.0442702	F
CSbapl.95654	0.0457516	0	0	F
CSbapl.96614	0.854962	0.112672	0.0100997	F
CSbapl.91760	0.0645161	43.5787	0.359213	F
CSbapl.91761	0.570423	5.28977	0.173958	F
CSbapl.96617	0.815889	0.154476	0.0135887	F
CSbapl.91766	0.788597	0.338821	0.0276027	F
CSbapl.91767	0.766452	1749.98	0.706451	F
CSbapl.35902	0.800018	1.83535	0.0985868	F
CSbapl.18828	0.0805423	0.304952	0.0251788	F
CSbapl.18829	0.139318	0	0	F
CSbapl.17839	0.134328	0.0799736	0.00727804	F
CSbapl.17836	0.256367	0	0	F
CSbapl.17837	0.304003	0.180757	0.015718	F
CSbapl.17834	0.166667	30.8418	0.327383	F
CSbapl.17833	0.538462	0.124549	0.0111041	F
CSbapl.18822	0.0686773	3.37874	0.139698	F
CSbapl.13108	0.431655	0.14804	0.0130598	F
CSbapl.13109	0.423423	0.0523021	0.00482262	F
CSbapl.98586	0.189542	0.285184	0.0237348	F
CSbapl.13103	0.221199	0.0945256	0.00854418	F
CSbapl.98581	0.112388	0	0	F
CSbapl.35604	0.0379404	0.126204	0.0112432	F
CSbapl.38275	0.493499	0.305856	0.0252443	F
CSbapl.46898	0.0673077	0.593968	0.044104	F
CSbapl.46899	0.736175	12.3412	0.24509	F
CSbapl.90389	0.654174	0.812901	0.056279	F
CSbapl.100041	0.15	0.443525	0.0347257	F
CSbapl.46892	0.698133	36.533	0.342938	F
CSbapl.46893	0.709153	31.4634	0.329212	F
CSbapl.46890	0.608422	17.2869	0.274919	F
CSbapl.3546	0.695868	1.49028	0.0863108	F
CSbapl.38074	0.597265	0.801523	0.0556834	F
CSbapl.38077	0.560345	0	0	F
CSbapl.38076	0.823589	1.68873	0.0935639	F
CSbapl.48607	0.717949	0.294327	0.0244054	F
CSbapl.98632	0.166667	1.3458	0.0806566	F
CSbapl.98639	0.142857	0.0725691	0.00662723	F
CSbapl.98638	0.11236	58.3898	0.38635	F
CSbapl.3548	0.736646	0.197911	0.0170824	F
CSbapl.3549	0.610324	14.0237	0.256325	F
CSbapl.80406	0.740893	1.72438	0.09481	F
CSbapl.80405	0.769231	0	0	F
CSbapl.80402	0.163636	0.920092	0.0617131	F
CSbapl.80401	0.0641822	0.0666208	0.00610115	F
CSbapl.80147	0.0816327	0.106971	0.00961374	F
CSbapl.20045	0.0666667	0	0	F
CSbapl.25036	0.0860215	0	0	F
CSbapl.20047	0.0560748	0	0	F
CSbapl.25034	0.703608	1.69668	0.0938431	F
CSbapl.25033	0.814455	66.8466	0.398943	F
CSbapl.25032	0.827955	8.93536	0.217206	F
CSbapl.20042	0.0588235	0.0436637	0.00404287	F
CSbapl.86802	0.102941	2.62009	0.1217	F
CSbapl.51360	0.282967	0.223361	0.0190711	F
CSbapl.51361	0.166667	0	0	F
CSbapl.51362	0.227619	2.00495	0.104082	F
CSbapl.52949	0.0839161	0	0	F
CSbapl.51365	0.832331	4.54818	0.162091	F
CSbapl.66269	0.0833333	0	0	F
CSbapl.66268	0.0664424	0.143856	0.0127145	F
CSbapl.51369	0.181818	0.135669	0.012035	F
CSbapl.66265	0.102473	1.02672	0.066826	F
CSbapl.66262	0.309735	0.646433	0.0471676	F
CSbapl.66260	0.527273	0.427219	0.0336511	F
CSbapl.47270	0.520756	1.13953	0.0719498	F
CSbapl.12271	0.0421687	0.145138	0.0128204	F
CSbapl.5860	0.0688228	0.665992	0.0482848	F
CSbapl.90964	0.0892019	0.500934	0.038415	F
CSbapl.90966	0.102273	0.491024	0.0377884	F
CSbapl.90961	0.2	0.125578	0.0111907	F
CSbapl.90963	0.136364	0.104793	0.00942744	F
CSbapl.90962	0.0982456	1.59658	0.090265	F
CSbapl.90969	0.0907563	2.73672	0.1247	F
CSbapl.4014	0.285916	0.615794	0.0453906	F
CSbapl.4011	0.075	0	0	F
CSbapl.4010	0.0787349	7.30045	0.200199	F
CSbapl.4013	0.0229885	0	0	F
CSbapl.68201	0.0480769	0.181976	0.0158156	F
CSbapl.79100	0.822979	55.6389	0.381863	F
CSbapl.47855	0.0882353	0.570025	0.0426723	F
CSbapl.47857	0.121387	2.53113	0.119347	F
CSbapl.47850	0.127517	31.9816	0.33071	F
CSbapl.47853	0.144654	4.85793	0.16723	F
CSbapl.47852	0.11332	4.14706	0.154992	F
CSbapl.28545	0.0952381	228.478	0.514216	F
CSbapl.39846	0.0783133	0.339904	0.0276791	F
CSbapl.39843	0.111111	0	0	F
CSbapl.33801	0.0960452	0.151669	0.0133584	F
CSbapl.33800	0.10582	0.203168	0.0174967	F
CSbapl.33803	0.0707071	0.0855132	0.00776203	F
CSbapl.33807	0.388889	1.87625	0.0999416	F
CSbapl.26079	0.471356	3.89247	0.150193	F
CSbapl.26077	0.759003	3.30415	0.138073	F
CSbapl.26072	0.717857	0.602807	0.0446272	F
CSbapl.26073	0.742922	0.439313	0.0344493	F
CSbapl.26070	0.72505	2.89024	0.128508	F
CSbapl.83197	0.0632911	0	0	F
CSbapl.83190	0.0912892	0.4397	0.0344748	F
CSbapl.83191	0.125	0.677162	0.0489169	F
CSbapl.83193	0.731019	0.570433	0.0426969	F
CSbapl.92523	0.0857143	0	0	F
CSbapl.92521	0.108152	0.509588	0.0389589	F
CSbapl.94239	0.760521	9.68538	0.224091	F
CSbapl.99512	0.100917	0.391287	0.031239	F
CSbapl.99518	0.11748	0	0	F
CSbapl.78277	0.70645	22.1227	0.297114	F
CSbapl.78276	0.152866	1.12001	0.0710827	F
CSbapl.78275	0.185185	0.432805	0.0340206	F
CSbapl.78270	0.0818713	0	0	F
CSbapl.4902	0.0869565	0	0	F
CSbapl.4900	0.0789474	0	0	F
CSbapl.78279	0.0555556	0.764959	0.0537437	F
CSbapl.78278	0.0769231	24.6787	0.307033	F
CSbapl.94236	0.706979	1.35176	0.0808966	F
CSbapl.16505	0.07479	0.118308	0.0105776	F
CSbapl.5057	0.125	0	0	F
CSbapl.5055	0.0758755	0	0	F
CSbapl.42988	0.752299	0.264	0.0221625	F
CSbapl.27308	0.104478	0.489128	0.037668	F
CSbapl.42984	0.0964912	0	0	F
CSbapl.27306	0.386517	0.144714	0.0127854	F
CSbapl.27305	0.259259	2.59927	0.121154	F
CSbapl.27304	0.475053	0.998298	0.0654897	F
CSbapl.27302	0.561669	4.01252	0.152486	F
CSbapl.42983	0.0833333	0.341539	0.0277945	F
CSbapl.72157	0.138127	2.47906	0.117941	F
CSbapl.87445	0.765599	4.12595	0.154603	F
CSbapl.87449	0.103448	0	0	F
CSbapl.12478	0.51118	2.41359	0.116144	F
CSbapl.88613	0.0784314	0	0	F
CSbapl.88611	0.0793651	1.05799	0.0682741	F
CSbapl.88615	0.0746269	0.0830327	0.00754562	F
CSbapl.88619	0.106557	0	0	F
CSbapl.77221	0.854465	0	0	F
CSbapl.8021	0.85687	1.79706	0.0973005	F
CSbapl.87998	0.100901	0.24961	0.0210794	F
CSbapl.62956	0.147059	0.670153	0.0485207	F
CSbapl.52125	0.0594214	1.06087	0.0684066	F
CSbapl.77225	0.665305	9.50352	0.222467	F
CSbapl.52128	0.109375	10.192	0.228473	F
CSbapl.87994	0.181818	0	0	F
CSbapl.77224	0.801303	2.05334	0.105594	F
CSbapl.62953	0.784978	39.6406	0.350463	F
CSbapl.12472	0.760526	53.6028	0.3784	F
CSbapl.77238	0.0909091	0	0	F
CSbapl.77234	0.2	0.1223	0.0109147	F
CSbapl.77235	0.111111	0.100629	0.00907023	F
CSbapl.41981	0.325235	3.08174	0.133054	F
CSbapl.41983	0.0833333	0	0	F
CSbapl.85599	0.12069	0	0	F
CSbapl.65943	0.0392157	0	0	F
CSbapl.65942	0.133333	0.0936376	0.0084674	F
CSbapl.2084	0.723011	1.69872	0.0939145	F
CSbapl.2085	0.600639	0.796603	0.0554247	F
CSbapl.2086	0.181818	0	0	F
CSbapl.2081	0.469163	0.276114	0.0230648	F
CSbapl.2083	0.714286	0.761945	0.053582	F
CSbapl.2088	0.182796	1.37916	0.0819927	F
CSbapl.31518	0.176471	0.558104	0.0419513	F
CSbapl.31512	0.108108	0.785873	0.0548581	F
CSbapl.65948	0.0761905	0.0446911	0.00413594	F
CSbapl.2338	0.0589623	0	0	F
CSbapl.2336	0.142857	0.127902	0.0113857	F
CSbapl.55476	0.0588235	0	0	F
CSbapl.2335	0.111765	0.0723571	0.00660853	F
CSbapl.2332	0.772511	16.7286	0.271986	F
CSbapl.2333	0.694582	14.0802	0.256681	F
CSbapl.55472	0.75	23.5098	0.302626	F
CSbapl.43169	0.162162	0	0	F
CSbapl.43168	0.0949033	0	0	F
CSbapl.43164	0.824924	5.93507	0.183197	F
CSbapl.100904	0.100917	0	0	F
CSbapl.43166	0.179907	0	0	F
CSbapl.43161	0.0833333	0	0	F
CSbapl.43163	0.757915	9.4973	0.222411	F
CSbapl.37916	0.0677966	0.278755	0.0232604	F
CSbapl.37915	0.025641	1.2854	0.0781891	F
CSbapl.37914	0.125	0.161907	0.0141956	F
CSbapl.37912	0.125	0.208642	0.017926	F
CSbapl.37911	0.181818	0	0	F
CSbapl.37918	0.10303	0.711331	0.0508247	F
CSbapl.76546	0.770681	4.32722	0.158246	F
CSbapl.76543	0.128319	0.94822	0.0630889	F
CSbapl.66539	0.2	0	0	F
CSbapl.43298	0.0406977	0	0	F
CSbapl.43293	0.807177	0.302466	0.0249984	F
CSbapl.46660	0.753647	1.10119	0.0702393	F
CSbapl.46663	0.804841	7.63402	0.203926	F
CSbapl.46665	0.102362	0.104762	0.00942479	F
CSbapl.46666	0.0983607	5.27098	0.173675	F
CSbapl.14617	0.112903	0.0878323	0.00796391	F
CSbapl.47137	0.104478	0.0853651	0.00774912	F
CSbapl.66532	0.123077	0.0449556	0.00415988	F
CSbapl.30649	0.125	1.89451	0.10054	F
CSbapl.3069	0.684932	0	0	F
CSbapl.66535	0.111111	0	0	F
CSbapl.69560	0.150327	0.255614	0.0215328	F
CSbapl.3064	0.103448	0.216133	0.0185106	F
CSbapl.3067	0.693884	41.922	0.35563	F
CSbapl.3066	0.745186	4.13391	0.15475	F
CSbapl.3061	0.0561798	0	0	F
CSbapl.3063	0.0416069	0	0	F
CSbapl.22216	0.51926	4.27855	0.157378	F
CSbapl.53423	0.676709	1.80155	0.0974522	F
CSbapl.22211	0.125	0	0	F
CSbapl.75164	0.766268	4.81514	0.166536	F
CSbapl.22218	0.680836	0.59358	0.044081	F
CSbapl.72567	0.7831	2.69968	0.123757	F
CSbapl.43839	0.0551181	0.0469331	0.00433873	F
CSbapl.62489	0.781102	1.80991	0.0977341	F
CSbapl.48118	0.738075	11.5825	0.239551	F
CSbapl.48115	0.115991	1.24293	0.0764148	F
CSbapl.49240	0.285714	0	0	F
CSbapl.49241	0.619439	2.163	0.108931	F
CSbapl.49246	0.253333	0.122406	0.0109236	F
CSbapl.49247	0.233871	0.328531	0.0268728	F
CSbapl.49245	0.774417	137.3	0.466314	F
CSbapl.41475	0.2	0	0	F
CSbapl.62483	0.721805	28.9795	0.321682	F
CSbapl.68898	0.125874	5.977	0.183768	F
CSbapl.65862	0.0991736	0	0	F
CSbapl.65863	0.111111	2.95537	0.130079	F
CSbapl.68890	0.740661	8.77174	0.215635	F
CSbapl.65869	0.15	0.0957434	0.00864938	F
CSbapl.68894	0.737752	18.7702	0.282297	F
CSbapl.68895	0.286296	1.1381	0.0718867	F
CSbapl.96030	0.174157	0.0938626	0.00848686	F
CSbapl.33345	0.100145	0	0	F
CSbapl.34556	0.0729167	0.042563	0.00394304	F
CSbapl.58976	0.9375	3.95043	0.151307	F
CSbapl.58970	0.137174	0.296518	0.0245654	F
CSbapl.71094	0.189114	0	0	F
CSbapl.71095	0.236377	0.249098	0.0210406	F
CSbapl.71097	0.420902	0.517976	0.0394831	F
CSbapl.71090	0.754353	7.65401	0.204145	F
CSbapl.68131	0.805273	13.7157	0.254366	F
CSbapl.71092	0.460222	0.860136	0.0587122	F
CSbapl.68762	0.597467	16.3027	0.269685	F
CSbapl.68766	0.751674	205.009	0.50401	F
CSbapl.23160	0.106667	0.438061	0.034367	F
CSbapl.68768	0.332986	41.0472	0.353682	F
CSbapl.23168	0.142857	0	0	F
CSbapl.36345	0.0714286	0.154264	0.0135713	F
CSbapl.36344	0.0882353	0.0985594	0.00889218	F
CSbapl.72678	0.271968	0.357032	0.0288807	F
CSbapl.72671	0.0833333	0	0	F
CSbapl.72673	0.0985915	7.49407	0.20238	F
CSbapl.7037	0.886548	0.820927	0.0566969	F
CSbapl.72674	0.105263	0	0	F
CSbapl.71322	0.106984	0	0	F
CSbapl.71320	0.150943	0.710152	0.0507596	F
CSbapl.71327	0.179981	0.127394	0.0113431	F
CSbapl.71325	0.104956	0.285561	0.0237625	F
CSbapl.74787	0.0952381	15.3582	0.264375	F
CSbapl.8810	0.111842	10.239	0.22887	F
CSbapl.74785	0.166667	0	0	F
CSbapl.8815	0.712774	19.5535	0.285972	F
CSbapl.8814	0.715336	50.8214	0.373454	F
CSbapl.8816	0.108429	7.0789	0.197639	F
CSbapl.74789	0.773088	4.62895	0.163458	F
CSbapl.74788	0.786155	10.9817	0.234922	F
CSbapl.35421	0.425721	6.90154	0.195539	F
CSbapl.35423	0.0870488	2.45656	0.117327	F
CSbapl.32434	0.0847458	0	0	F
CSbapl.35424	0.142857	0.646636	0.0471793	F
CSbapl.35427	0.0625	0.150514	0.0132634	F
CSbapl.35426	0.0833333	0.389881	0.0311434	F
CSbapl.35429	0.2	0.0829361	0.00753719	F
CSbapl.91569	0.0926966	11.8519	0.241555	F
CSbapl.32439	0.140351	0	0	F
CSbapl.97815	0.140351	0.0307591	0.00286589	F
CSbapl.36880	0.745711	27.9548	0.318392	F
CSbapl.53259	0.141538	0.639156	0.0467485	F
CSbapl.73788	0.145833	0	0	F
CSbapl.73789	0.0731707	0.146182	0.0129066	F
CSbapl.64099	0.137931	0	0	F
CSbapl.64096	0.243902	21.9395	0.296362	F
CSbapl.64097	0.0932862	2.00208	0.103992	F
CSbapl.64094	0.648162	1.35095	0.0808641	F
CSbapl.64095	0.482759	3.94511	0.151205	F
CSbapl.64092	0.732777	60.9184	0.390294	F
CSbapl.64093	0.0909091	0	0	F
CSbapl.64090	0.2	0	0	F
CSbapl.73785	0.120879	0	0	F
CSbapl.100935	0.166667	0.0649423	0.00595216	F
CSbapl.60682	0.702418	0.331601	0.0270911	F
CSbapl.23159	0.0909091	0	0	F
CSbapl.95711	0.0347448	0	0	F
CSbapl.95716	0.0954545	0.372071	0.0299234	F
CSbapl.24306	0.772609	538.823	0.595138	F
CSbapl.24307	0.0842006	0	0	F
CSbapl.24304	0.849286	8.2707	0.210656	F
CSbapl.24302	0.102703	0.167308	0.0146343	F
CSbapl.24300	0.794347	30.4123	0.326098	F
CSbapl.73251	0.106195	0.700102	0.050202	F
CSbapl.61572	0.484663	4.6719	0.164177	F
CSbapl.35283	0.0909091	0	0	F
CSbapl.73257	0.748533	16.7492	0.272096	F
CSbapl.73258	0.0408163	0	0	F
CSbapl.73259	0.0521739	0	0	F
CSbapl.61578	0.803514	22.9318	0.300368	F
CSbapl.69383	0.572088	0	0	F
CSbapl.69382	0.190092	45.1055	0.362398	F
CSbapl.69385	0.205381	0.627316	0.0460628	F
CSbapl.34489	0.134529	0.378622	0.0303739	F
CSbapl.34480	0.2	2.36976	0.114922	F
CSbapl.34485	0.0909091	0.383505	0.0307084	F
CSbapl.69965	0.0980392	0.190975	0.0165331	F
CSbapl.69964	0.0368664	0	0	F
CSbapl.94041	0.143713	0	0	F
CSbapl.94047	0.0203252	0	0	F
CSbapl.69963	0.252372	0	0	F
CSbapl.69962	0.078534	2.97884	0.130639	F
CSbapl.50654	0.25	0	0	F
CSbapl.69969	0.0769962	0	0	F
CSbapl.69968	0.105263	0.403748	0.0320825	F
CSbapl.65055	0.102804	0.236216	0.02006	F
CSbapl.62006	0.562851	0.950992	0.0632234	F
CSbapl.65057	0.0981595	0	0	F
CSbapl.62003	0.798837	3.12434	0.134036	F
CSbapl.62002	0.60695	14.6346	0.260096	F
CSbapl.62001	0.758904	79.0416	0.41458	F
CSbapl.19987	0.176471	0	0	F
CSbapl.60711	0.0949185	0.0855627	0.00776635	F
CSbapl.19982	0.2	0	0	F
CSbapl.51001	0.105691	0	0	F
CSbapl.15202	0.81803	23.7375	0.3035	F
CSbapl.15201	0.8861	1.95556	0.102515	F
CSbapl.51002	0.0909091	0	0	F
CSbapl.15206	0.817404	2.04001	0.10518	F
CSbapl.20534	0.0980392	0	0	F
CSbapl.97	0.0473684	0.200433	0.0172814	F
CSbapl.20536	0.153846	0	0	F
CSbapl.26279	0.160194	2.71415	0.124127	F
CSbapl.26272	0.109375	0.874367	0.0594331	F
CSbapl.66656	0.0909091	0	0	F
CSbapl.66652	0.118717	0	0	F
CSbapl.22978	0.104869	0.432917	0.034028	F
CSbapl.22974	0.166667	0.0443257	0.00410284	F
CSbapl.156	0.618386	2.59429	0.121024	F
CSbapl.45749	0.1	0.202183	0.0174191	F
CSbapl.45748	0.0625	0	0	F
CSbapl.93906	0.0842105	1.95896	0.102624	F
CSbapl.93907	0.107527	1.96644	0.102862	F
CSbapl.9980	0.466189	6.10117	0.185436	F
CSbapl.64878	0.147059	0	0	F
CSbapl.14559	0.0625	0.0909879	0.00823793	F
CSbapl.9981	0.160377	10.4842	0.230911	F
CSbapl.14556	0.0851064	1.51937	0.0874095	F
CSbapl.64877	0.104938	0.31028	0.0255642	F
CSbapl.64872	0.0909091	0	0	F
CSbapl.97029	0.41686	0.92459	0.0619345	F
CSbapl.50753	0.806183	5.12149	0.171393	F
CSbapl.50750	0.125	0.0731664	0.00667989	F
CSbapl.92058	0.488252	3.67003	0.145791	F
CSbapl.50756	0.733711	6.41405	0.189515	F
CSbapl.50757	0.661376	19.5966	0.286171	F
CSbapl.50754	0.565217	0	0	F
CSbapl.50755	0.627451	0	0	F
CSbapl.58565	0.3125	0.047124	0.00435599	F
CSbapl.97020	0.0666667	2.33637	0.113979	F
CSbapl.50758	0.765587	1.48537	0.086124	F
CSbapl.50759	0.778441	43.443	0.358924	F
CSbapl.97025	0.11165	5.80706	0.181435	F
CSbapl.97024	0.0967742	1.23838	0.0762226	F
CSbapl.97027	0.0697674	0.0258187	0.0024114	F
CSbapl.97026	0.798823	5.73402	0.180415	F
CSbapl.3922	0.782519	823.656	0.635222	F
CSbapl.63068	0.780779	26.6584	0.314058	F
CSbapl.63066	0.0689655	0	0	F
CSbapl.5215	0.819808	45.9672	0.36415	F
CSbapl.5216	0.703704	13.2162	0.251099	F
CSbapl.64503	0.641297	0.285188	0.0237351	F
CSbapl.5212	0.167918	140.093	0.468205	F
CSbapl.14627	0.192308	0	0	F
CSbapl.6749	0.0344828	0	0	F
CSbapl.6748	0.023753	0.15511	0.0136406	F
CSbapl.9742	0.0898216	0	0	F
CSbapl.9740	0.0439845	0.169031	0.0147739	F
CSbapl.14625	0.26087	0.0528552	0.00487233	F
CSbapl.9746	0.111111	0.195378	0.0168822	F
CSbapl.9747	0.12	0.958126	0.0635686	F
CSbapl.27284	0.115385	0	0	F
CSbapl.58699	0.499822	1.02231	0.0666195	F
CSbapl.58698	0.4	0	0	F
CSbapl.50121	0.770097	24.0871	0.304828	F
CSbapl.58695	0.376623	0.21681	0.0185632	F
CSbapl.58694	0.246154	1.89246	0.100473	F
CSbapl.99356	0.0478723	0.777659	0.054422	F
CSbapl.6295	0.0611111	0.0516836	0.00476701	F
CSbapl.1246	0.649123	26.0638	0.312003	F
CSbapl.18321	0.104167	5.13675	0.171629	F
CSbapl.1244	0.569669	13.9839	0.256075	F
CSbapl.18325	0.152672	2.65524	0.122614	F
CSbapl.18324	0.719643	7.2035	0.199087	F
CSbapl.6299	0.116147	5.38781	0.175422	F
CSbapl.1248	0.725317	16.289	0.269611	F
CSbapl.42214	0.107843	0.201207	0.0173424	F
CSbapl.42216	0.115502	2.37037	0.114939	F
CSbapl.38477	0.749077	0.143349	0.0126725	F
CSbapl.25498	0.0521739	0	0	F
CSbapl.12897	0.649492	0.60961	0.0450278	F
CSbapl.12893	0.0526316	0.00574968	0.00054235	F
CSbapl.96370	0.132743	0.469812	0.0364329	F
CSbapl.96376	0.137931	0.946092	0.0629855	F
CSbapl.62827	0.2	0	0	F
CSbapl.62820	0.428571	0.691724	0.0497347	F
CSbapl.62822	0.371173	5.54736	0.177755	F
CSbapl.56343	0.673767	63.2427	0.39378	F
CSbapl.56341	0.0612813	1.00336	0.0657291	F
CSbapl.54858	0.0677467	0.0437917	0.00405446	F
CSbapl.7164	0.101879	14.9987	0.262274	F
CSbapl.7165	0.794555	56.1797	0.382762	F
CSbapl.7167	0.779897	4.54146	0.161976	F
CSbapl.7161	0.747268	5.52775	0.177472	F
CSbapl.7162	0.859939	3.31471	0.138305	F
CSbapl.7163	0.2	1.4156	0.0834302	F
CSbapl.7168	0.764976	21.581	0.294872	F
CSbapl.7169	0.133117	0.760147	0.0534854	F
CSbapl.28360	0.14557	0	0	F
CSbapl.28361	0.0652174	0	0	F
CSbapl.28362	0.725122	0.051925	0.00478872	F
CSbapl.28363	0.804238	0.429159	0.0337796	F
CSbapl.28364	0.2	0.162513	0.014245	F
CSbapl.28365	0.561324	0.0339174	0.0031553	F
CSbapl.10668	0.102674	8.86449	0.216529	F
CSbapl.10669	0.08576	2.07798	0.106354	F
CSbapl.99826	0.15	0	0	F
CSbapl.99825	0.0666667	0	0	F
CSbapl.10662	0.125	0	0	F
CSbapl.99822	0.818182	6.52106	0.190871	F
CSbapl.39261	0.0378378	0	0	F
CSbapl.89818	0.0757576	0	0	F
CSbapl.16791	0.191304	0	0	F
CSbapl.89813	0.0625	0	0	F
CSbapl.89810	0.312127	0	0	F
CSbapl.89816	0.1	0	0	F
CSbapl.89814	0.25	1.24362	0.0764436	F
CSbapl.17076	0.705989	1.46096	0.0851902	F
CSbapl.84992	0.0682927	1.191	0.0741988	F
CSbapl.46460	0.66978	0.0917144	0.0083009	F
CSbapl.46466	0.657122	0.439437	0.0344575	F
CSbapl.46465	0.577291	0.718701	0.0512313	F
CSbapl.46464	0.814249	0.325342	0.0266454	F
CSbapl.47335	0.125	0.189916	0.016449	F
CSbapl.47336	0.05	0	0	F
CSbapl.47337	0.0684932	0	0	F
CSbapl.47331	0.222222	0	0	F
CSbapl.40100	0.823305	18.7789	0.282338	F
CSbapl.60441	0.112903	0.0849021	0.00770876	F
CSbapl.86460	0.491935	0.203194	0.0174987	F
CSbapl.47339	0.108108	0	0	F
CSbapl.40109	0.0436893	0	0	F
CSbapl.48697	0.141176	0	0	F
CSbapl.90025	0.76981	4.45436	0.160477	F
CSbapl.90026	0.529412	0.0993136	0.0089571	F
CSbapl.90020	0.831208	5.98949	0.183937	F
CSbapl.44827	0.0720721	1.5041	0.0868341	F
CSbapl.44826	0.0524017	0	0	F
CSbapl.90028	0.638394	5.93788	0.183236	F
CSbapl.98428	0.261084	0.208412	0.017908	F
CSbapl.3660	0.0909091	0	0	F
CSbapl.3667	0.0987755	1.72738	0.0949141	F
CSbapl.61039	0.71102	5.90053	0.182725	F
CSbapl.61037	0.522178	5.79843	0.181315	F
CSbapl.13315	0.0946602	0.502115	0.0384895	F
CSbapl.61034	0.2	0.305836	0.0252428	F
CSbapl.13313	0.125	0	0	F
CSbapl.61032	0.107143	5.80699	0.181434	F
CSbapl.61030	0.75751	40.9336	0.353426	F
CSbapl.11224	0.142857	0	0	F
CSbapl.11220	0.1	0	0	F
CSbapl.11229	0.111111	0.0878358	0.00796422	F
CSbapl.11228	0.0884718	0.159101	0.0139669	F
CSbapl.22204	0.117647	0.123163	0.0109874	F
CSbapl.27918	0.0923077	0	0	F
CSbapl.22104	0.133333	0	0	F
CSbapl.14959	0.404717	87.2505	0.423816	F
CSbapl.27913	0.0959596	0	0	F
CSbapl.27910	0.166667	1.41228	0.0833004	F
CSbapl.27916	0.0714286	0	0	F
CSbapl.25200	0.770515	6.38452	0.189138	F
CSbapl.25203	0.764196	5.67231	0.179544	F
CSbapl.25205	0.123596	2.48064	0.117984	F
CSbapl.76171	0.125	0.104069	0.00936542	F
CSbapl.25208	0.2	3.33079	0.138657	F
CSbapl.25209	0.0777778	0	0	F
CSbapl.82120	0.0638075	29.3917	0.322973	F
CSbapl.86639	0.0888889	0	0	F
CSbapl.86636	0.0754414	0	0	F
CSbapl.86637	0.0754414	0	0	F
CSbapl.86633	0.154167	0	0	F
CSbapl.93594	0.129032	0	0	F
CSbapl.93590	0.88785	2.07767	0.106344	F
CSbapl.93592	0.736645	3.45944	0.141426	F
CSbapl.93599	0.653004	1.06657	0.0686676	F
CSbapl.11899	0.633643	5.63178	0.178967	F
CSbapl.68562	0.105991	1.28067	0.0779932	F
CSbapl.68561	0.121951	1939.43	0.716169	F
CSbapl.68567	0.125	0	0	F
CSbapl.68565	0.431579	0.741594	0.052483	F
CSbapl.68568	0.0909091	0	0	F
CSbapl.44178	0.414335	11.3204	0.237559	F
CSbapl.45888	0.154003	53.9012	0.378915	F
CSbapl.45889	0.0216216	0.13193	0.011723	F
CSbapl.45880	0.0769231	96.589	0.433331	F
CSbapl.45883	0.852967	0.425217	0.0335183	F
CSbapl.45884	0.840816	9.58269	0.223177	F
CSbapl.45886	0.648368	3.90657	0.150465	F
CSbapl.45887	0.696012	18.9147	0.282986	F
CSbapl.93043	0.546277	3.2643	0.137193	F
CSbapl.93042	0.113846	0.089246	0.00808678	F
CSbapl.93040	0.147727	0.0624024	0.00572627	F
CSbapl.93046	0.677299	102.169	0.438591	F
CSbapl.55937	0.105882	0	0	F
CSbapl.55936	0.132333	2.54627	0.119751	F
CSbapl.55933	0.2	0	0	F
CSbapl.5153	0.683442	0.123138	0.0109853	F
CSbapl.70435	0.0625	0	0	F
CSbapl.54085	0.0909091	0	0	F
CSbapl.70439	0.132353	0	0	F
CSbapl.54088	0.0876147	0.913561	0.0613908	F
CSbapl.83653	0.0714286	101.654	0.438118	F
CSbapl.83652	0.102041	0.590618	0.043905	F
CSbapl.73051	0.0466563	0.00587359	0.000554004	F
CSbapl.45228	0.752909	15.2797	0.263921	F
CSbapl.45225	0.814957	2.90576	0.128885	F
CSbapl.45220	0.648536	1.38441	0.0822009	F
CSbapl.45222	0.2	0	0	F
CSbapl.45223	0.750848	157.33	0.479108	F
CSbapl.53196	0.0981595	0	0	F
CSbapl.53191	0.129032	0	0	F
CSbapl.53193	0.0681818	0	0	F
CSbapl.53198	0.0976744	0	0	F
CSbapl.93237	0.894444	0.470561	0.0364811	F
CSbapl.92314	0.0769231	0	0	F
CSbapl.92315	0.0855457	5.25216	0.173391	F
CSbapl.84568	0.653443	5.22729	0.173014	F
CSbapl.84561	0.702128	2.14308	0.108334	F
CSbapl.84566	0.0740741	0	0	F
CSbapl.53441	0.865642	1.7135	0.0944314	F
CSbapl.53448	0.137255	0.5128	0.03916	F
CSbapl.57577	0.127273	0	0	F
CSbapl.16594	0.0572917	0.779751	0.0545332	F
CSbapl.91	0.79612	45.696	0.363602	F
CSbapl.84388	0.0637681	0.477871	0.0369502	F
CSbapl.84384	0.0786517	0.28549	0.0237573	F
CSbapl.73310	0.128571	2.83772	0.127223	F
CSbapl.88807	0.321429	0.0429585	0.00397892	F
CSbapl.73317	0.514023	1.71727	0.0945627	F
CSbapl.52718	0.105263	0	0	F
CSbapl.68884	0.11271	2.80934	0.126521	F
CSbapl.52714	0.380952	1.86544	0.0995854	F
CSbapl.52716	0.810416	3.47403	0.141735	F
CSbapl.52717	0.0929225	6.4214	0.189609	F
CSbapl.52711	0.255422	11.3685	0.237929	F
CSbapl.68886	0.04	0	0	F
CSbapl.56401	0.537195	25.2311	0.309046	F
CSbapl.56624	0.207756	0.189556	0.0164203	F
CSbapl.41404	0.835809	8.65342	0.214483	F
CSbapl.68880	0.102564	0.0513344	0.00473559	F
CSbapl.15049	0.647754	0.35309	0.0286056	F
CSbapl.15048	0.743235	8.30984	0.211055	F
CSbapl.15044	0.914843	2.16465	0.108981	F
CSbapl.43315	0.0930233	0.0340929	0.00317136	F
CSbapl.43312	0.784829	5.52607	0.177447	F
CSbapl.46141	0.846871	3.93488	0.151009	F
CSbapl.15043	0.81426	19.3319	0.284947	F
CSbapl.43311	0.788561	7.34041	0.200653	F
CSbapl.28590	0.245795	0.234527	0.0199307	F
CSbapl.85386	0.63217	4.13043	0.154686	F
CSbapl.85383	0.805157	21.4494	0.294319	F
CSbapl.85382	0.119942	0.181976	0.0158156	F
CSbapl.31495	0.650485	1.03699	0.0673038	F
CSbapl.74847	0.120603	0.663698	0.0481544	F
CSbapl.74840	0.141767	0.142351	0.0125899	F
CSbapl.2273	0.660505	63.3752	0.393975	F
CSbapl.2272	0.82618	0	0	F
CSbapl.2270	0.692085	31.3499	0.32888	F
CSbapl.2275	0.11236	0	0	F
CSbapl.10015	0.125	0	0	F
CSbapl.19217	0.169811	0.219771	0.0187931	F
CSbapl.19212	0.125	0	0	F
CSbapl.99750	0.0748899	0	0	F
CSbapl.19218	0.106145	11.9086	0.241971	F
CSbapl.19219	0.603955	4.61033	0.163145	F
CSbapl.37898	0.258552	5.55514	0.177868	F
CSbapl.37899	0.183807	2.64354	0.122311	F
CSbapl.37892	0.170732	0.183793	0.0159609	F
CSbapl.37893	0.763928	19.8336	0.287253	F
CSbapl.37890	0.539474	2.0275	0.10479	F
CSbapl.37891	0.820971	194.981	0.499289	F
CSbapl.37895	0.770655	4.31259	0.157986	F
CSbapl.15162	0.745678	1.67646	0.0931312	F
CSbapl.86965	0.333333	1.04719	0.0677766	F
CSbapl.86962	0.668103	1.18844	0.0740882	F
CSbapl.73863	0.120438	0	0	F
CSbapl.73862	0.0854271	0.035423	0.00329296	F
CSbapl.73861	0.101562	0	0	F
CSbapl.21975	0.373869	0.637079	0.0466286	F
CSbapl.21973	0.181917	1.78078	0.0967483	F
CSbapl.73868	0.110998	0.405336	0.0321894	F
CSbapl.48090	0.0970655	0.0841965	0.00764722	F
CSbapl.21978	0.592211	4.62499	0.163391	F
CSbapl.37766	0.0869565	0.927235	0.0620644	F
CSbapl.37768	0.116049	0	0	F
CSbapl.14794	0.707359	3.92452	0.150811	F
CSbapl.40663	0.287087	0.162183	0.0142181	F
CSbapl.72196	0.809506	5.23963	0.173201	F
CSbapl.72197	0.141414	0.148244	0.0130766	F
CSbapl.97229	0.176471	0	0	F
CSbapl.97222	0.224168	5.6786	0.179633	F
CSbapl.97220	0.4	0	0	F
CSbapl.97227	0.0930233	0.114799	0.0102803	F
CSbapl.97224	0.0857143	0.0394238	0.00365777	F
CSbapl.10272	0.138365	8.1367	0.209279	F
CSbapl.471	0.832928	0.158633	0.0139286	F
CSbapl.48328	0.113636	0	0	F
CSbapl.478	0.086351	4.77218	0.165835	F
CSbapl.59901	0.436787	8.20657	0.21	F
CSbapl.59902	0.0469799	0.411946	0.0326334	F
CSbapl.59903	0.641509	0.184554	0.0160217	F
CSbapl.48326	0.0815047	0.0239291	0.00223698	F
CSbapl.59905	0.746738	2.129	0.107909	F
CSbapl.59906	0.200054	0.375609	0.0301669	F
CSbapl.52823	0.834421	27.5256	0.316979	F
CSbapl.75082	0.760482	2.95226	0.130005	F
CSbapl.97593	0.751145	12.8612	0.248707	F
CSbapl.97592	0.622752	2.94639	0.129864	F
CSbapl.75087	0.102564	0.38779	0.0310009	F
CSbapl.66306	0.72973	1.71967	0.0946462	F
CSbapl.75085	0.181818	0.938209	0.0626016	F
CSbapl.97596	0.636439	0.359635	0.029062	F
CSbapl.75088	0.125	0	0	F
CSbapl.3745	0.564585	9.86658	0.225682	F
CSbapl.72739	0.107143	0	0	F
CSbapl.72734	0.7763	1.71388	0.0944447	F
CSbapl.9233	0.166667	0	0	F
CSbapl.9230	0.0480167	0.0390115	0.00362024	F
CSbapl.9231	0.140265	1.15879	0.0727977	F
CSbapl.72731	0.747901	9.38283	0.221374	F
CSbapl.9235	0.753383	0.979706	0.0646055	F
CSbapl.22407	0.102439	1.19349	0.0743062	F
CSbapl.65745	0.567164	0.677404	0.0489305	F
CSbapl.22402	0.140616	0.442461	0.034656	F
CSbapl.65744	0.813541	27.785	0.317835	F
CSbapl.75331	0.0666667	0	0	F
CSbapl.22408	0.0921053	0.0663536	0.00607745	F
CSbapl.71429	0.925	0.45404	0.0354124	F
CSbapl.71428	0.876923	0.267111	0.0223951	F
CSbapl.71420	0.111111	0.401741	0.0319471	F
CSbapl.71422	0.269772	0.806885	0.0559646	F
CSbapl.71425	0.181818	0	0	F
CSbapl.65740	0.123134	0.21803	0.018658	F
CSbapl.96175	0.0714286	0	0	F
CSbapl.65742	0.181872	0.0925239	0.00837102	F
CSbapl.96178	0.74615	29.9351	0.32465	F
CSbapl.98315	0.0624727	0.0892246	0.00808491	F
CSbapl.98310	0.127358	6.60557	0.191928	F
CSbapl.98318	0.0516129	0.0335774	0.00312419	F
CSbapl.98319	0.0576456	0	0	F
CSbapl.12179	0.451923	4.21499	0.156232	F
CSbapl.8618	0.798521	8.41908	0.212158	F
CSbapl.36385	0.0555841	0.111984	0.0100411	F
CSbapl.32600	0.128571	3.68195	0.146032	F
CSbapl.91337	0.0655738	0	0	F
CSbapl.32605	0.145161	0.737441	0.0522572	F
CSbapl.32608	0.1	1.37289	0.0817427	F
CSbapl.32609	0.166667	0.700946	0.050249	F
CSbapl.74069	0.774377	4.00384	0.152322	F
CSbapl.10762	0.168895	0.117549	0.0105134	F
CSbapl.74060	0.775494	2.54469	0.119709	F
CSbapl.74061	0.813178	1.5423	0.0882665	F
CSbapl.74067	0.2	0.0289881	0.00270322	F
CSbapl.70778	0.0746269	0	0	F
CSbapl.24809	0.1	0	0	F
CSbapl.70772	0.199187	0.900215	0.0607288	F
CSbapl.70773	0.153285	1.57973	0.0896492	F
CSbapl.24807	0.0440252	0	0	F
CSbapl.24801	0.0754717	0	0	F
CSbapl.70777	0.136054	0.0803967	0.0073151	F
CSbapl.24803	0.2	0	0	F
CSbapl.16554	0.0890233	0.0602448	0.00553397	F
CSbapl.16552	0.691922	8.82501	0.21615	F
CSbapl.16553	0.0446429	0	0	F
CSbapl.69022	0.0909091	2.33316	0.113888	F
CSbapl.16558	0.810089	1.21407	0.0751896	F
CSbapl.16559	0.47619	0.285269	0.023741	F
CSbapl.62906	0.0714286	0	0	F
CSbapl.17380	0.820135	3.58734	0.144101	F
CSbapl.12424	0.78392	0.17486	0.0152443	F
CSbapl.62905	0.0625	0	0	F
CSbapl.12423	0.80189	1.1656	0.0730957	F
CSbapl.23468	0.943869	25.2111	0.308974	F
CSbapl.12421	0.113955	0.539531	0.0408169	F
CSbapl.23465	0.784354	0.915096	0.0614667	F
CSbapl.23463	0.125	0.041473	0.00384409	F
[truncated: 29,286 more rows]

## Sheet: M_genebody_5mC_vs_gene_express
Gene	M_5mC_level	expr_count	expr_ratio	group
CSbapl.11333	0.410325	0.103673	0.0103756	M	expr_count：fpkm
CSbapl.11331	0.69007	3.97648	0.16879	M	expr_ratio：log10(fpkm+1)/max（log10(fpkm+1)）
CSbapl.11337	0.669565	0.381567	0.0339972	M
CSbapl.11336	0.520183	5.19387	0.191808	M
CSbapl.11334	0.672361	1.1278	0.0794225	M
CSbapl.95455	0.812911	1.41542	0.0927585	M
CSbapl.95453	0.764932	33.4601	0.372328	M
CSbapl.95450	0.025	0.143722	0.0141248	M
CSbapl.64448	0.695652	0.364774	0.0327108	M
CSbapl.24060	0.618566	0.366107	0.0328135	M
CSbapl.24066	0.0909091	0	0	M
CSbapl.24065	0.10596	3.33145	0.154188	M
CSbapl.64442	0.0677966	0	0	M
CSbapl.11211	0.102215	0.13035	0.0128879	M
CSbapl.67181	0.401362	0.0431628	0.00444475	M
CSbapl.67180	0.116618	0.305925	0.0280747	M
CSbapl.20766	0.0526316	0	0	M
CSbapl.20767	0.167364	0.184759	0.0178327	M
CSbapl.67185	0.078125	0.160973	0.0156995	M
CSbapl.67184	0.423729	1.19805	0.0828392	M
CSbapl.67187	0.856965	6.35103	0.209824	M
CSbapl.72578	0.787752	3.81068	0.165226	M
CSbapl.63870	0.129032	0.103105	0.0103215	M
CSbapl.63874	0.0969163	0.376792	0.033633	M
CSbapl.62694	0.129121	0.0459251	0.00472292	M
CSbapl.62695	0.290909	0	0	M
CSbapl.55018	0.0741688	0.536804	0.0451978	M
CSbapl.44200	0.2	0.0926902	0.00932373	M
CSbapl.90562	0.147059	0.314366	0.0287523	M
CSbapl.18735	0.636189	3.68942	0.16254	M
CSbapl.38639	0.176471	0.272999	0.0253887	M
CSbapl.53604	0.432099	0.412039	0.0362919	M
CSbapl.17502	0.687117	0.559217	0.0467207	M
CSbapl.38630	0.478384	0.215643	0.0205395	M
CSbapl.38637	0.142145	0.0759665	0.00770144	M
CSbapl.21028	0.181818	0.314311	0.0287479	M
CSbapl.93113	0.117808	0.0416653	0.00429365	M
CSbapl.93114	0.116402	0	0	M
CSbapl.94321	0.100592	0	0	M
CSbapl.94320	0.0487805	0.119173	0.0118426	M
CSbapl.69800	0.156425	0	0	M
CSbapl.69801	0.754302	20.8917	0.324607	M
CSbapl.69807	0.126087	0	0	M
CSbapl.69805	0.117647	0	0	M
CSbapl.65319	0.781707	3.59217	0.160336	M
CSbapl.65313	0.0988252	1.26952	0.0862046	M
CSbapl.65315	0.125	0	0	M
CSbapl.63251	0.105263	0	0	M
CSbapl.63259	0.762971	4.62068	0.181594	M
CSbapl.15360	0.813538	7.62358	0.226617	M
CSbapl.15361	0.725696	0.705161	0.056132	M
CSbapl.15362	0.821429	0.0767811	0.00778105	M
CSbapl.15363	0.747335	4.33838	0.176174	M
CSbapl.16949	0.0631068	0	0	M
CSbapl.51123	0.142857	1.0282	0.07438	M
CSbapl.15366	0.789442	0.62369	0.0509824	M
CSbapl.16945	0.2	0.0833602	0.00842176	M
CSbapl.15369	0.762899	1.05486	0.0757538	M
CSbapl.8139	0.752304	1.17983	0.0819635	M
CSbapl.26337	0.805481	8.18594	0.233262	M
CSbapl.26330	0.111111	0	0	M
CSbapl.45153	0.788749	11.5861	0.266387	M
CSbapl.45150	0.633636	3.55642	0.159514	M
CSbapl.45157	0.811321	17.0583	0.304359	M
CSbapl.66753	0.136364	0	0	M
CSbapl.45158	0.763855	1.04223	0.0751054	M
CSbapl.27440	0.142857	0.103155	0.0103263	M
CSbapl.92242	0.0809859	0	0	M
CSbapl.92241	0.0540541	0	0	M
CSbapl.13619	0.812142	28.8563	0.357244	M
CSbapl.99011	0.070059	0.0381825	0.00394138	M
CSbapl.99018	0.0736698	1.18598	0.0822603	M
CSbapl.99019	0.0827974	0.461028	0.0398792	M
CSbapl.13403	0.83307	23.3503	0.335802	M
CSbapl.13402	0.748866	12.1724	0.271176	M
CSbapl.13401	0.858907	14.1244	0.28571	M
CSbapl.13400	0.101266	2.70083	0.137638	M
CSbapl.13407	0.2	0	0	M
CSbapl.13406	0.0769231	0	0	M
CSbapl.57607	0.133333	0.586481	0.048544	M
CSbapl.57606	0.851515	2.76497	0.139446	M
CSbapl.97146	0.142857	0.169305	0.0164517	M
CSbapl.13409	0.0918367	0.0301662	0.00312607	M
CSbapl.13408	0.0909091	0.0566999	0.00580093	M
CSbapl.97143	0.604938	2.88183	0.142661	M
CSbapl.50659	0.0967742	0	0	M
CSbapl.58407	0.153846	0	0	M
CSbapl.5559	0.565776	1.25814	0.085676	M
CSbapl.58405	0.125	0.117	0.0116381	M
CSbapl.5556	0.693534	4.40872	0.177551	M
CSbapl.58408	0.0625	0	0	M
CSbapl.5550	0.166667	0.0996079	0.00998753	M
CSbapl.67182	0.11689	0.130316	0.0128847	M
CSbapl.9669	0.0278746	0	0	M
CSbapl.22055	0.793044	19.4678	0.317533	M
CSbapl.22056	0.782609	40.8044	0.392649	M
CSbapl.50386	0.166667	0.0652614	0.00664971	M
CSbapl.22050	0.682831	6.58496	0.213119	M
CSbapl.22052	0.764706	0.505171	0.0430101	M
CSbapl.67404	0.156187	0.131636	0.0130074	M
CSbapl.67405	0.147099	0.903118	0.0676848	M
CSbapl.7953	0.70438	0.230196	0.0217912	M
CSbapl.7952	0.701443	1.16615	0.0813014	M
CSbapl.7955	0.767277	62.4388	0.436518	M
CSbapl.20762	0.104816	0	0	M
CSbapl.67403	0.127198	1.66883	0.103252	M
CSbapl.7958	0.814357	5.52985	0.197364	M
CSbapl.25251	0.262376	0	0	M
CSbapl.23901	0.64867	132.641	0.514888	M
CSbapl.23902	0.792294	10.0667	0.252854	M
CSbapl.23907	0.291139	16.5961	0.301632	M
CSbapl.18203	0.117188	0.0559683	0.00572808	M
CSbapl.6394	0.829142	8.40179	0.235705	M
CSbapl.18205	0.25897	0.0954604	0.00959006	M
CSbapl.6396	0.632911	0.180158	0.0174235	M
CSbapl.18208	0.204819	0	0	M
CSbapl.92938	0.802105	15.1716	0.292752	M
CSbapl.92939	0.75136	0.570842	0.047502	M
CSbapl.42311	0.106383	5.32513	0.194014	M
CSbapl.42310	0.0911095	4.14203	0.172232	M
CSbapl.92936	0.931217	59.0608	0.430763	M
CSbapl.42312	0.688002	84.9891	0.468509	M
CSbapl.92930	0.711246	0.153088	0.0149827	M
CSbapl.42314	0.0606061	0	0	M
CSbapl.92932	0.17757	0.0814473	0.00823588	M
CSbapl.92933	0.304965	0.265621	0.0247773	M
CSbapl.12758	0.0931677	2.35582	0.127345	M
CSbapl.12754	0.021419	0.0710625	0.00722095	M
CSbapl.12752	0.0218945	0	0	M
CSbapl.12753	0.0259403	0	0	M
CSbapl.56552	0.721399	4.58979	0.181014	M
CSbapl.56553	0.0413793	0.0432137	0.00444988	M
CSbapl.56550	0.111111	0.20475	0.0195927	M
CSbapl.56556	0.089899	0.131403	0.0129858	M
CSbapl.56557	0.935065	1.07618	0.0768393	M
CSbapl.56554	0.763996	4.41601	0.177692	M
CSbapl.96230	0.075	0.0379173	0.00391451	M
CSbapl.98050	0.121951	0	0	M
CSbapl.98055	0.430754	0.0325197	0.00336609	M
CSbapl.84958	0.15747	1009.73	0.727702	M
CSbapl.86666	0.215026	0.293282	0.0270513	M
CSbapl.10453	0.0877193	0	0	M
CSbapl.10452	0.0833333	0	0	M
CSbapl.98526	0.0927487	0.102199	0.0102351	M
CSbapl.7044	0.852096	19.8611	0.319535	M
CSbapl.88578	0.0784314	0	0	M
CSbapl.39348	0.795753	1.7704	0.107181	M
CSbapl.99909	0.156863	0.0524625	0.0053783	M
CSbapl.2678	0.129032	0.060622	0.00619062	M
CSbapl.99904	0.07	0.104918	0.0104942	M
CSbapl.2676	0.590909	0.578029	0.0479821	M
CSbapl.2675	0.785962	2.13326	0.120127	M
CSbapl.99900	0.553073	0.199759	0.0191561	M
CSbapl.37415	0.0754717	0.0357297	0.00369259	M
CSbapl.37411	0.0714286	0.0436807	0.00449697	M
CSbapl.80485	0.0888535	0.782466	0.0607957	M
CSbapl.37418	0.208812	12.6032	0.274561	M
CSbapl.4631	0.977273	0.785584	0.0609795	M
CSbapl.4632	0.838043	69.7081	0.447929	M
CSbapl.4635	0.315335	6.73865	0.215229	M
CSbapl.4637	0.73397	22.4184	0.331698	M
CSbapl.4639	0.817105	0.911917	0.0681699	M
CSbapl.47557	0.0689655	0.0638181	0.0065071	M
CSbapl.80736	0.378049	0.306468	0.0281183	M
CSbapl.40262	0.767198	4.08489	0.171057	M
CSbapl.40261	0.810916	120.334	0.504727	M
CSbapl.40260	0.105263	0.762574	0.0596152	M
CSbapl.81283	0.78327	6.02454	0.205045	M
CSbapl.44944	0.182302	4.19487	0.173307	M
CSbapl.44945	0.259259	0	0	M
CSbapl.81287	0.761605	12.387	0.272875	M
CSbapl.90300	0.0666667	0	0	M
CSbapl.90302	0.237124	0.231872	0.0219343	M
CSbapl.44948	0.774995	1.19516	0.0827008	M
CSbapl.44949	0.111111	0.618825	0.0506668	M
CSbapl.4097	0.183908	0	0	M
CSbapl.4096	0.41791	0.120672	0.0119834	M
CSbapl.4091	0.111111	0.107214	0.0107126	M
CSbapl.4093	0.219219	0.0802718	0.00812148	M
CSbapl.55140	0.689266	1.73202	0.105713	M
CSbapl.55144	0.845511	1.0848	0.0772754	M
CSbapl.55145	0.773858	1.14803	0.0804182	M
CSbapl.82394	0.18239	0.169744	0.0164911	M
CSbapl.5943	0.245608	1.57741	0.0995858	M
CSbapl.5945	0.224806	0.798241	0.0617225	M
CSbapl.27819	0.2	0	0	M
CSbapl.27818	0.0531915	0	0	M
CSbapl.27817	0.606164	0.427754	0.037456	M
CSbapl.27816	0.779489	18.3713	0.311741	M
CSbapl.27815	0.30303	0.115875	0.0115322	M
CSbapl.73957	0.417103	7.47768	0.224823	M
CSbapl.27810	0.870544	0.274667	0.0255264	M
CSbapl.41135	0.127139	2.42184	0.129394	M
CSbapl.41136	0.811779	15.2712	0.293398	M
CSbapl.25523	0.113924	0	0	M
CSbapl.41139	0.748782	0.132811	0.0131165	M
CSbapl.86776	0.2	0	0	M
CSbapl.86774	0.666667	0	0	M
CSbapl.79188	0.0983051	7.89605	0.229889	M
CSbapl.79184	0.616428	2.25384	0.124099	M
CSbapl.79181	0.953846	0	0	M
CSbapl.35060	0.0442693	0.205472	0.0196557	M
CSbapl.35062	0.0714286	0	0	M
CSbapl.33888	0.741776	36.5691	0.381414	M
CSbapl.33883	0.117647	0.304998	0.0279999	M
CSbapl.33882	0.111111	0	0	M
CSbapl.33885	0.170905	0.133004	0.0131345	M
CSbapl.33886	0.440097	2.10273	0.119097	M
CSbapl.70377	0.0819672	0.442903	0.0385662	M
CSbapl.93117	0.0749064	0.0652614	0.00664971	M
CSbapl.70371	0.847737	11.5329	0.265941	M
CSbapl.93116	0.0920502	1.93663	0.11331	M
CSbapl.70378	0.312169	0.539105	0.0453552	M
CSbapl.78580	0.751938	0	0	M
CSbapl.78583	0.121501	0.129081	0.0127697	M
CSbapl.60761	0.037037	0.0983224	0.0098645	M
CSbapl.78584	0.120736	0.104689	0.0104725	M
CSbapl.78589	0.829838	3.4006	0.155854	M
CSbapl.85672	0.0962199	0.036763	0.00379747	M
CSbapl.53258	0.111111	0	0	M
CSbapl.88035	0.125	0	0	M
CSbapl.88032	0.2	0	0	M
CSbapl.88030	0.0588235	0.336776	0.0305306	M
CSbapl.88031	0.0529801	0.0197115	0.00205315	M
CSbapl.53253	0.121445	0.0200017	0.00208308	M
CSbapl.53250	0.415961	3.98318	0.168932	M
CSbapl.53251	0.50813	0	0	M
CSbapl.53256	0.136364	0.215648	0.0205399	M
CSbapl.52770	0.0792683	0.550782	0.0461501	M
CSbapl.52771	0.553126	1.04626	0.0753127	M
CSbapl.87910	0.111111	0.425501	0.0372899	M
CSbapl.87911	0.168142	0	0	M
CSbapl.87913	0.084507	0.0747958	0.00758694	M
CSbapl.87916	0.1	0.617549	0.0505839	M
CSbapl.87918	0.120316	0	0	M
CSbapl.88699	0.714361	7.51422	0.225275	M
CSbapl.32820	0.166667	0	0	M
CSbapl.32824	0.151786	0	0	M
CSbapl.32826	0.125	0.0616959	0.00629707	M
CSbapl.91322	0.74717	1.37166	0.0908353	M
CSbapl.3971	0.0526316	0.0999456	0.0100198	M
CSbapl.89344	0.0713805	0.790264	0.0612549	M
CSbapl.89342	0.107929	2.85914	0.142044	M
CSbapl.89340	0.16	0	0	M
CSbapl.88963	0.1	0	0	M
CSbapl.73053	0.0909091	0	0	M
CSbapl.88966	0.0552632	0.0787187	0.00797015	M
CSbapl.88967	0.135593	0	0	M
CSbapl.88968	0.111732	0	0	M
CSbapl.85518	0.821474	2.99263	0.145621	M
CSbapl.85513	0.0553746	0.212931	0.0203045	M
CSbapl.41904	0.0892857	0.695962	0.0555631	M
CSbapl.41907	0.902208	8.8522	0.240627	M
CSbapl.41901	0.811857	6.1362	0.206704	M
CSbapl.41900	0.103636	0.818335	0.0628913	M
CSbapl.41903	0.811971	3.55156	0.159402	M
CSbapl.14527	0.133333	0	0	M
CSbapl.41909	0.733805	3.03947	0.146848	M
CSbapl.54053	0.44426	0.388895	0.0345536	M
CSbapl.15365	0.56391	10.4957	0.256855	M
CSbapl.18166	0.821957	0.890133	0.0669646	M
CSbapl.43213	0.0681818	0.271443	0.02526	M
CSbapl.15161	0.847778	34.7194	0.376103	M
CSbapl.70406	0.076087	0	0	M
CSbapl.43215	0.0524345	0.0323999	0.00335389	M
CSbapl.43214	0.0662132	0.199216	0.0191084	M
CSbapl.15168	0.0768246	0.536537	0.0451795	M
CSbapl.79977	0.734037	2.56983	0.133848	M
CSbapl.79976	0.796081	1.19755	0.0828151	M
CSbapl.79975	0.867647	0.323937	0.0295154	M
CSbapl.79974	0.285714	3.50224	0.158256	M
CSbapl.79970	0.107011	2.61826	0.135265	M
CSbapl.19310	0.0975177	0.177638	0.0171986	M
CSbapl.19316	0.0769231	0.066995	0.00682074	M
CSbapl.37997	0.77409	6.71585	0.214918	M
CSbapl.37996	0.03125	0.030262	0.00313584	M
CSbapl.37994	0.604826	3.69941	0.162764	M
CSbapl.37991	0.0732984	0	0	M
CSbapl.95583	0.0526316	0	0	M
CSbapl.73944	0.0869565	0	0	M
CSbapl.73946	0.173653	0.357061	0.0321147	M
CSbapl.243	0.864583	0.0746158	0.00756932	M
CSbapl.242	0.727175	11.1851	0.26298	M
CSbapl.240	0.74571	19.2244	0.316274	M
CSbapl.246	0.15493	0	0	M
CSbapl.72098	0.12	0.0857732	0.00865578	M
CSbapl.40742	0.2	0	0	M
CSbapl.97308	0.0736842	0	0	M
CSbapl.97309	0.111111	0.0673439	0.00685514	M
CSbapl.14690	0.181818	0	0	M
CSbapl.97301	0.12766	0.027449	0.00284826	M
CSbapl.14699	0.0967742	0	0	M
CSbapl.97305	0.176471	0	0	M
CSbapl.95236	0.0909091	0	0	M
CSbapl.95237	0.2	0	0	M
CSbapl.95235	0.0909091	0	0	M
CSbapl.95233	0.0980392	0	0	M
CSbapl.95239	0.765552	21.4711	0.327354	M
CSbapl.64229	0.119792	0.315192	0.0288184	M
CSbapl.9062	0.581921	0.110269	0.0110024	M
CSbapl.9061	0.671136	6.03381	0.205184	M
CSbapl.9064	0.166667	0	0	M
CSbapl.64220	0.37037	0.952836	0.0703973	M
CSbapl.14343	0.112903	1.4566	0.0945363	M
CSbapl.64222	0.536658	30.8636	0.364088	M
CSbapl.64225	0.144433	3.59067	0.160302	M
CSbapl.64224	0.125	0	0	M
CSbapl.64227	0.110236	0.955869	0.0705606	M
CSbapl.22291	0.510031	1.37046	0.090782	M
CSbapl.79537	0.0951613	1.0684	0.0764447	M
CSbapl.18446	0.122807	2.41962	0.129326	M
CSbapl.18449	0.194357	0.479156	0.0411763	M
CSbapl.72140	0.0670391	0	0	M
CSbapl.37398	0.25	0.198322	0.01903	M
CSbapl.75472	0.126707	3.35031	0.154645	M
CSbapl.71549	0.0892388	0.283641	0.0262643	M
CSbapl.71545	0.132911	0.125465	0.0124323	M
CSbapl.71543	0.129032	0	0	M
CSbapl.71540	0.166667	0.0853139	0.00861128	M
CSbapl.36118	0.142857	0.456167	0.0395287	M
CSbapl.36110	0.367164	0.38712	0.0344191	M
CSbapl.36112	0.125	5.8142	0.201848	M
CSbapl.36113	0.2	0.132366	0.0130752	M
CSbapl.36114	0.1	0	0	M
CSbapl.98218	0.855236	3.58184	0.160099	M
CSbapl.24924	0.0630202	0	0	M
CSbapl.98212	0.222222	0.748856	0.0587934	M
CSbapl.98211	0.2	0.0783708	0.00793622	M
CSbapl.98216	0.125	0	0	M
CSbapl.98215	0.732558	0.132552	0.0130925	M
CSbapl.98214	0.688276	9.85073	0.250781	M
CSbapl.66759	0.781715	1.04749	0.0753758	M
CSbapl.33694	0.0820312	0.0376558	0.00388801	M
CSbapl.33695	0.104673	0.0303338	0.00314318	M
CSbapl.33697	0.166667	0	0	M
CSbapl.33691	0.125	0	0	M
CSbapl.33693	0.163934	0.202024	0.0193545	M
CSbapl.91071	0.126126	0.0465701	0.00478775	M
CSbapl.38183	0.105543	0.143642	0.0141175	M
CSbapl.91073	0.137931	0.751574	0.0589568	M
CSbapl.32121	0.0859375	4.05497	0.170436	M
CSbapl.32122	0.129707	0.20481	0.0195979	M
CSbapl.91079	0.109267	0.0816284	0.00825349	M
CSbapl.32129	0.0846561	0.879296	0.0663598	M
CSbapl.32128	0.0952381	0.0435076	0.00447952	M
CSbapl.611	0.76437	4.33388	0.176085	M
CSbapl.23654	0.802361	82.3177	0.46519	M
CSbapl.23657	0.114754	0.0463451	0.00476514	M
CSbapl.23651	0.775064	0.874997	0.0661189	M
CSbapl.74707	0.0676923	0.931549	0.0692445	M
CSbapl.74704	0.104167	0	0	M
CSbapl.8895	0.0689655	0	0	M
CSbapl.42	0.079646	0	0	M
CSbapl.74700	0.1	0.247559	0.0232653	M
CSbapl.18998	0.101158	0.0331552	0.00343081	M
CSbapl.70637	0.132075	0.201775	0.0193327	M
CSbapl.18991	0.0740741	0.128191	0.0126867	M
CSbapl.70635	0.142857	0.176904	0.017133	M
CSbapl.18993	0.125	0.201945	0.0193475	M
CSbapl.18994	0.113489	0.434914	0.0379822	M
CSbapl.18995	0.0729144	0.0700331	0.00711981	M
CSbapl.70631	0.84306	1.70631	0.104719	M
CSbapl.70630	0.111111	0.184118	0.0177758	M
CSbapl.69309	0.146341	0.0644161	0.00656621	M
CSbapl.66173	0.0285714	0	0	M
CSbapl.69303	0.464625	1.62256	0.101412	M
CSbapl.69304	0.78949	8.43913	0.236122	M
CSbapl.69307	0.0769231	5.32583	0.194025	M
CSbapl.85092	0.793123	6.96751	0.218294	M
CSbapl.12341	0.124559	0.0187319	0.00195205	M
CSbapl.12347	0.71901	13.4004	0.280551	M
CSbapl.97891	0.856728	26.6089	0.349012	M
CSbapl.36808	0.166667	0.0542982	0.0055616	M
CSbapl.97893	0.166667	2.48167	0.131217	M
CSbapl.97894	0.84375	0	0	M
CSbapl.97897	0.140572	0.203229	0.0194598	M
CSbapl.36802	0.0614035	0.0514639	0.00527846	M
CSbapl.36806	0.0769231	0	0	M
CSbapl.36804	0.0909091	0.736089	0.0580227	M
CSbapl.100173	0.039604	0	0	M
CSbapl.100179	0.135135	0	0	M
CSbapl.34401	0.479512	1.3781	0.0911204	M
CSbapl.34402	0.622857	0.472525	0.0407037	M
CSbapl.50874	0.175439	0	0	M
CSbapl.34404	0.882571	4.68701	0.182828	M
CSbapl.34406	0.152709	0.453755	0.0393543	M
CSbapl.34408	0.123732	0	0	M
CSbapl.50879	0.411043	3.06435	0.147494	M
CSbapl.20352	0.15	0	0	M
CSbapl.95791	0.819444	4.23898	0.174197	M
CSbapl.95790	0.839827	0.929276	0.0691206	M
CSbapl.95793	0.161512	209.848	0.56285	M
CSbapl.95795	0.742775	12.9039	0.27686	M
CSbapl.95794	0.810525	8.77347	0.239783	M
CSbapl.45015	0.0816327	0.133657	0.0131951	M
CSbapl.64764	0.108696	0.0798362	0.00807905	M
CSbapl.64766	0.415045	0.0247413	0.0025707	M
CSbapl.34335	0.832939	94.2508	0.479269	M
CSbapl.47961	0.105882	1.17887	0.0819175	M
CSbapl.47963	0.846693	18.3626	0.311694	M
CSbapl.47965	0.868088	225.724	0.570486	M
CSbapl.47966	0.728787	38.7334	0.387305	M
CSbapl.62086	0.0444965	0	0	M
CSbapl.62082	0.083266	0	0	M
CSbapl.62080	0.119048	0.0248857	0.00258552	M
CSbapl.11104	0.1	0	0	M
CSbapl.67225	0.633285	1.90352	0.112117	M
CSbapl.39759	0.622831	8.17764	0.233167	M
CSbapl.11102	0.1	0	0	M
CSbapl.90459	0.113636	160.954	0.5351	M
CSbapl.67229	0.296875	0.0592047	0.00604997	M
CSbapl.39755	0.175772	0.0530287	0.00543487	M
CSbapl.90671	0.0864428	0.0844674	0.0085292	M
CSbapl.63931	0.0637484	0.0478955	0.00492088	M
CSbapl.63939	0.521577	0.429985	0.0376203	M
CSbapl.9853	0.810472	5.25353	0.192816	M
CSbapl.61687	0.728145	39.8957	0.390338	M
CSbapl.9856	0.125	0.109202	0.0109013	M
CSbapl.61682	0.0575792	0.366778	0.0328651	M
CSbapl.90454	0.770874	6.63145	0.213762	M
CSbapl.10859	0.355013	0.260503	0.0243511	M
CSbapl.10858	0.125	0	0	M
CSbapl.9859	0.047619	0	0	M
CSbapl.61688	0.817103	1.45255	0.0943631	M
CSbapl.61689	0.638398	6.40552	0.210601	M
CSbapl.62337	0.042029	0.297212	0.0273705	M
CSbapl.62336	0.0412371	0.490193	0.0419582	M
CSbapl.62332	0.706737	3.91915	0.167571	M
CSbapl.62338	0.149038	0.473706	0.040788	M
CSbapl.25725	0.748427	6.85635	0.216817	M
CSbapl.25721	0.783263	1.66434	0.103075	M
CSbapl.25720	0.781321	2.50974	0.132062	M
CSbapl.81779	0.142857	0	0	M
CSbapl.25729	0.563672	19.079	0.315515	M
CSbapl.63683	0.0520833	0	0	M
CSbapl.29655	0.0217391	0.110269	0.0110024	M
CSbapl.96859	0.0509554	0	0	M
CSbapl.96856	0.412879	0.0322581	0.00333944	M
CSbapl.86571	0.0720339	0	0	M
CSbapl.96852	0.829027	0.9955	0.0726705	M
CSbapl.96851	0.2875	0.0667425	0.00679585	M
CSbapl.29658	0.156219	2.66089	0.136497	M
CSbapl.21403	0.827502	2.47263	0.130944	M
CSbapl.21400	0.750729	4.0042	0.169374	M
CSbapl.21401	0.662166	7.01337	0.218898	M
CSbapl.21407	0.027027	0	0	M
CSbapl.21405	0.521529	5.2082	0.192051	M
CSbapl.99998	0.0829694	2.9682	0.144975	M
CSbapl.95643	0.751429	20.0209	0.320337	M
CSbapl.25899	0.726329	5.47257	0.196437	M
CSbapl.25898	0.108239	0.265379	0.0247572	M
CSbapl.25895	0.125	0	0	M
CSbapl.25894	0.166667	0.0614249	0.00627021	M
CSbapl.80807	0.400601	0.383732	0.0341618	M
CSbapl.25893	0.413293	36.7112	0.381811	M
CSbapl.25892	0.0666667	0.673922	0.0541872	M
CSbapl.44430	0.0696203	0.0582687	0.00595697	M
CSbapl.44431	0.117647	0.82555	0.0633078	M
CSbapl.95647	0.789498	12.0457	0.270159	M
CSbapl.53690	0.795516	0.76115	0.0595302	M
CSbapl.60795	0.466667	0	0	M
CSbapl.60796	0.426471	0.113197	0.0112794	M
CSbapl.84531	0.0569948	0.569859	0.0474362	M
CSbapl.60793	0.0621469	0.202863	0.0194278	M
CSbapl.60792	0.556066	2.24853	0.123927	M
CSbapl.60798	0.618185	3.52238	0.158725	M
CSbapl.904	0.0827068	12.2235	0.271583	M
CSbapl.59255	0.0733042	0.246423	0.0231696	M
CSbapl.59256	0.0833333	0.0603344	0.00616209	M
CSbapl.907	0.485714	3.3419	0.154442	M
CSbapl.59251	0.136364	0.167262	0.0162678	M
CSbapl.902	0.745897	23.0085	0.334315	M
CSbapl.59253	0.790783	6.32902	0.209508	M
CSbapl.93328	0.72548	32.0549	0.367949	M
CSbapl.53695	0.839695	0.317673	0.0290166	M
CSbapl.59258	0.104478	2.46149	0.130606	M
CSbapl.59259	0.85949	0.48825	0.041821	M
CSbapl.5295	0.111111	0	0	M
CSbapl.5296	0.0425532	1.68641	0.103943	M
CSbapl.78091	0.0780781	7.26364	0.222133	M
CSbapl.8073	0.468329	46.5843	0.406271	M
CSbapl.8071	0.791727	19.3096	0.316717	M
CSbapl.8077	0.0967742	0.126589	0.0125373	M
CSbapl.5299	0.2	0	0	M
CSbapl.8074	0.166667	0.10233	0.0102476	M
CSbapl.60246	0.857691	1.39825	0.0920077	M
CSbapl.6929	0.181818	0.121056	0.0120194	M
CSbapl.6928	0.0582586	2.51171	0.132121	M
CSbapl.54568	0.149733	8.92923	0.241446	M
CSbapl.47658	0.706325	6.50397	0.21199	M
CSbapl.6923	0.137387	1.12064	0.079068	M
CSbapl.6922	0.0864865	2.13564	0.120207	M
CSbapl.6920	0.818391	61.0642	0.434214	M
CSbapl.27769	0.0833333	0.421098	0.0369645	M
CSbapl.27767	0.1	0.107606	0.0107498	M
CSbapl.58612	0.0796653	893.901	0.7149	M
CSbapl.58611	0.0833333	0	0	M
CSbapl.58617	0.0935583	1.37866	0.0911452	M
CSbapl.5749	0.0930233	0.406492	0.0358779	M
CSbapl.5746	0.133333	0	0	M
CSbapl.5741	0.0512821	0.0910015	0.00916105	M
CSbapl.57602	0.142496	0.268315	0.0250009	M
CSbapl.57604	0.0904977	0.0976007	0.00979536	M
CSbapl.27499	0.142857	0	0	M
CSbapl.27492	0.142857	0.782642	0.0608061	M
CSbapl.27491	0.0888889	0	0	M
CSbapl.42873	0.148827	0	0	M
CSbapl.27497	0.111111	0.0587329	0.00600311	M
CSbapl.27496	0.166058	0.919868	0.0686065	M
CSbapl.42876	0.170732	0.103817	0.0103894	M
CSbapl.82983	0.153846	0.0726082	0.00737264	M
CSbapl.82987	0.134328	0.0242068	0.00251583	M
CSbapl.82989	0.583111	8.29908	0.23455	M
CSbapl.60286	0.741144	0.198835	0.019075	M
CSbapl.45479	0.768243	4.49897	0.179291	M
CSbapl.45478	0.0770416	0.0616959	0.00629707	M
CSbapl.24805	0.2	0	0	M
CSbapl.83058	0.725804	5.30018	0.193598	M
CSbapl.45471	0.731917	38.9116	0.387776	M
CSbapl.45470	0.74333	200.235	0.557942	M
CSbapl.83057	0.938224	6.10712	0.206275	M
CSbapl.83056	0.561515	5.0336	0.18905	M
CSbapl.45475	0.170569	0.0696259	0.00707977	M
CSbapl.45477	0.116071	0	0	M
CSbapl.83052	0.047619	0	0	M
CSbapl.50020	0.0810811	0	0	M
CSbapl.50022	0.21978	0	0	M
CSbapl.50023	0.114286	0.063543	0.00647989	M
CSbapl.57036	0.0545455	0	0	M
CSbapl.57034	0.09375	0	0	M
CSbapl.50029	0.768072	11.962	0.269482	M
CSbapl.55760	0.0909091	0	0	M
CSbapl.55762	0.0769231	0	0	M
CSbapl.6219	0.0364583	0.0769602	0.00779855	M
CSbapl.17190	0.142857	0.0612021	0.00624813	M
CSbapl.17193	0.111111	0.987471	0.0722465	M
CSbapl.6217	0.0228728	0.285328	0.0264025	M
CSbapl.6216	0.719201	8.49604	0.236754	M
CSbapl.42294	0.84287	6.32315	0.209424	M
CSbapl.42295	0.12381	0.0337946	0.00349588	M
CSbapl.42296	0.699636	1.2277	0.0842486	M
CSbapl.42290	0.112207	1.42313	0.0930936	M
CSbapl.42292	0.115385	0.124093	0.012304	M
CSbapl.42293	0.798368	3.1571	0.149867	M
CSbapl.11935	0.0888031	0.752165	0.0589923	M
CSbapl.11934	0.80859	55.2902	0.423943	M
CSbapl.11937	0.126394	0.262604	0.0245262	M
CSbapl.11936	0.836656	105.336	0.490848	M
CSbapl.11930	0.807828	1.57633	0.0995419	M
CSbapl.11932	0.740731	5.06471	0.189591	M
CSbapl.11938	0.780699	6.18011	0.207349	M
CSbapl.17440	0.0310881	0.679017	0.0545068	M
CSbapl.53647	0.77907	1.36071	0.0903487	M
CSbapl.53646	0.779521	12.8569	0.276504	M
CSbapl.98155	0.629304	3.11154	0.148708	M
CSbapl.98151	0.0697674	0	0	M
CSbapl.98152	0.0652174	0	0	M
CSbapl.98153	0.0416667	0	0	M
CSbapl.42128	0.128778	0	0	M
CSbapl.42129	0.747748	1.73712	0.10591	M
CSbapl.42123	0.0318471	0	0	M
CSbapl.42124	0.114498	0.261278	0.0244157	M
CSbapl.42125	0.0204082	0.105713	0.0105699	M
CSbapl.101347	0.166667	0.159137	0.015533	M
CSbapl.101345	0.185185	0	0	M
CSbapl.101343	0.0982143	0	0	M
CSbapl.101341	0.125	0.551102	0.0461718	M
CSbapl.30776	0.823529	0	0	M
CSbapl.100438	0.662467	2.58193	0.134203	M
CSbapl.30771	0.752351	0.741181	0.0583308	M
CSbapl.84911	0.265467	0.120977	0.012012	M
CSbapl.100437	0.15	0	0	M
CSbapl.43451	0.293614	0.00951235	0.000995811	M
CSbapl.30778	0.918427	0.171374	0.0166376	M
CSbapl.84916	0.15	0.240437	0.0226632	M
CSbapl.3160	0.362235	0.133215	0.0131541	M
CSbapl.3193	0.72712	4.51986	0.17969	M
CSbapl.3194	0.270833	0.475311	0.0409025	M
CSbapl.51869	0.1	0	0	M
CSbapl.51868	0.750193	2.84748	0.141726	M
CSbapl.3199	0.811064	51.4051	0.416421	M
CSbapl.51866	0.0637205	0	0	M
CSbapl.51865	0.81864	0.313149	0.0286549	M
CSbapl.51864	0.634312	0.590656	0.0488204	M
CSbapl.47510	0.810243	10.5749	0.257577	M
CSbapl.47511	0.135135	0.0307482	0.00318547	M
CSbapl.47512	0.0785777	0.627205	0.0512099	M
CSbapl.56079	0.785549	2.82409	0.141084	M
CSbapl.56078	0.763921	2.92164	0.143734	M
CSbapl.56071	0.677193	0.555447	0.0464661	M
CSbapl.56070	0.706335	11.1425	0.262612	M
CSbapl.56073	0.778039	1.79927	0.108271	M
CSbapl.56072	0.736364	55.4494	0.42424	M
CSbapl.56075	0.726236	4.00194	0.169327	M
CSbapl.56077	0.0666667	0.615493	0.0504501	M
CSbapl.43989	0.121212	0.187398	0.0180667	M
CSbapl.43981	0.793709	3.68904	0.162532	M
CSbapl.43980	0.148148	0	0	M
CSbapl.43987	0.0894309	0	0	M
CSbapl.43986	0.159348	0	0	M
CSbapl.43985	0.0611621	0	0	M
CSbapl.43984	0.0808824	0	0	M
CSbapl.16719	0.111111	0	0	M
CSbapl.16715	0.145833	0	0	M
CSbapl.16716	0.815204	16.4382	0.300684	M
CSbapl.50387	0.142857	0	0	M
CSbapl.16713	0.755963	20.1112	0.320788	M
CSbapl.89891	0.097561	0	0	M
CSbapl.89896	0.596154	4.4933	0.179183	M
CSbapl.89894	0.67393	28.2241	0.354993	M
CSbapl.89899	0.0384615	0.129264	0.0127867	M
CSbapl.52519	0.363274	0.233396	0.0220645	M
CSbapl.2822	0.82325	4.85631	0.185913	M
CSbapl.37206	0.828062	111.07	0.496372	M
CSbapl.77629	0.110345	0.166856	0.0162312	M
CSbapl.40188	0.153846	0	0	M
CSbapl.37200	0.0833333	0	0	M
CSbapl.77625	0.313725	0	0	M
CSbapl.40187	0.0899563	0	0	M
CSbapl.40184	0.0930233	0	0	M
CSbapl.77620	0.125	0	0	M
CSbapl.40180	0.102167	0.11003	0.0109797	M
CSbapl.7956	0.108108	2.30395	0.125707	M
CSbapl.81367	0.0810943	0.682645	0.0547339	M
CSbapl.81361	0.741854	2.13951	0.120337	M
CSbapl.81363	0.732955	0.1134	0.0112986	M
CSbapl.81362	0.765407	2.7211	0.138213	M
CSbapl.69020	0.0526316	0.82442	0.0632427	M
CSbapl.57850	0.0666667	0.312969	0.0286405	M
CSbapl.57852	0.076087	0.0523175	0.00536381	M
CSbapl.49375	0.120724	3.0114	0.146114	M
CSbapl.49370	0.142857	19.866	0.319559	M
CSbapl.71290	0.111111	0.1353	0.0133474	M
CSbapl.41581	0.695653	9.84756	0.250751	M
CSbapl.41582	0.105263	0.391107	0.034721	M
CSbapl.90535	0.2	0	0	M
CSbapl.45804	0.593373	1.39049	0.0916672	M
CSbapl.45807	0.0869565	0.0542002	0.00555182	M
CSbapl.45808	0.0740741	0	0	M
CSbapl.73888	0.0666667	0.108121	0.0107987	M
CSbapl.71708	0.047619	0.0763649	0.00774039	M
CSbapl.71700	0.166667	50.9581	0.41552	M
CSbapl.71701	0.117647	0.309272	0.0283439	M
CSbapl.71703	0.047619	0.482236	0.041395	M
CSbapl.71704	0.0571429	0.103994	0.0104062	M
CSbapl.71705	0.0747664	0.0997277	0.00999899	M
CSbapl.71706	0.0366242	0.212731	0.0202872	M
CSbapl.38422	0.701122	119.1	0.503652	M
CSbapl.79579	0.799135	12.2562	0.271842	M
CSbapl.79578	0.822996	96.9955	0.482257	M
CSbapl.79573	0.828683	50.1276	0.413825	M
CSbapl.79572	0.207883	900.275	0.715647	M
CSbapl.79571	0.729497	3.50117	0.158231	M
CSbapl.79570	0.837156	0.268462	0.0250131	M
CSbapl.79577	0.857531	48.0476	0.409456	M
CSbapl.79575	0.782969	7.96056	0.230649	M
CSbapl.79574	0.768659	32.7513	0.370142	M
CSbapl.73636	0.664551	40.7536	0.392521	M
CSbapl.73637	0.0474453	0	0	M
CSbapl.73635	0.787361	75.9115	0.456775	M
CSbapl.78620	0.090368	11.3401	0.26431	M
CSbapl.73633	0.125	0.212115	0.0202337	M
CSbapl.73630	0.0869565	0.0627022	0.00639671	M
CSbapl.73631	0.0909091	0	0	M
CSbapl.73881	0.10041	0.617336	0.05057	M
CSbapl.73320	0.106667	0	0	M
CSbapl.6393	0.0829268	0.359194	0.0322799	M
CSbapl.73882	0.106599	3.89711	0.167099	M
CSbapl.76284	0.101129	0.191621	0.0184401	M
CSbapl.76287	0.0769231	2.07526	0.118162	M
CSbapl.76280	0.836889	10.5098	0.256984	M
CSbapl.76282	0.784573	0.508644	0.0432525	M
CSbapl.33456	0.822981	9.1866	0.244138	M
CSbapl.33457	0.696682	0.722044	0.0571683	M
CSbapl.33455	0.823863	8.08928	0.232149	M
CSbapl.35154	0.158537	0.0714595	0.00725993	M
CSbapl.73582	0.0848268	0.182279	0.0176123	M
CSbapl.33458	0.830718	7.45738	0.22457	M
CSbapl.35110	0.16	0.885492	0.0667061	M
CSbapl.79600	0.142857	0.224387	0.0212934	M
CSbapl.32324	0.126316	0	0	M
CSbapl.32323	0.837209	0.0877589	0.00884797	M
CSbapl.32322	0.794661	3.56097	0.159619	M
CSbapl.32320	0.782555	1.28079	0.0867261	M
CSbapl.35119	0.119792	0	0	M
CSbapl.73584	0.726669	8.54347	0.237278	M
CSbapl.32329	0.233444	0.734563	0.0579302	M
CSbapl.78373	0.0757576	0	0	M
CSbapl.35153	0.0689655	0.225625	0.0213996	M
CSbapl.78371	0.0769231	0	0	M
CSbapl.87035	0.0804598	0.0231851	0.00241084	M
CSbapl.68074	0.0757576	0	0	M
CSbapl.79399	0.0988372	16.1302	0.298809	M
CSbapl.68077	0.111111	1.17855	0.081902	M
CSbapl.79397	0.717106	3.00015	0.145819	M
CSbapl.68079	0.878788	11.0841	0.262105	M
CSbapl.79395	0.762577	6.02865	0.205107	M
CSbapl.98647	0.115702	0.385762	0.0343161	M
CSbapl.79391	0.825251	6.45186	0.211257	M
CSbapl.79390	0.0865385	217.324	0.566515	M
CSbapl.26548	0.0873016	0.1512	0.0148103	M
CSbapl.54001	0.736756	4.095	0.171266	M
CSbapl.54005	0.043956	0.20475	0.0195927	M
CSbapl.72947	0.353846	4.03322	0.169983	M
CSbapl.92935	0.806173	34.0241	0.374036	M
CSbapl.42313	0.100806	2.3047	0.12573	M
CSbapl.72949	0.850761	9.88477	0.251111	M
CSbapl.27632	0.364314	225.146	0.570217	M
CSbapl.92937	0.77866	20.9861	0.325059	M
CSbapl.75393	0.105263	0	0	M
CSbapl.42317	0.8208	0.317404	0.0289951	M
CSbapl.69671	0.77619	0.700968	0.0558731	M
CSbapl.69673	0.0754717	0	0	M
CSbapl.69674	0.816077	1.10086	0.0780826	M
CSbapl.69678	0.130435	0	0	M
CSbapl.75396	0.807638	1.99902	0.115521	M
CSbapl.34242	0.222222	0	0	M
CSbapl.34243	0.0916031	0.28592	0.0264509	M
CSbapl.65163	0.804137	0.488044	0.0418064	M
CSbapl.65162	0.166667	0.143578	0.0141116	M
CSbapl.80913	0.125	0	0	M
CSbapl.74620	0.0909091	0.959462	0.0707536	M
CSbapl.65168	0.827564	10.7712	0.259345	M
CSbapl.34248	0.444682	0.361305	0.0324431	M
CSbapl.74623	0.105769	0.0255236	0.00265097	M
CSbapl.74624	0.125	0	0	M
CSbapl.74627	0.125874	0.976581	0.0716685	M
CSbapl.66205	0.142857	0	0	M
CSbapl.71489	0.818984	104.416	0.489934	M
CSbapl.40979	0.72211	0.459827	0.0397927	M
CSbapl.40978	0.73073	1.3005	0.0876312	M
CSbapl.40971	0.550336	0.247045	0.023222	M
CSbapl.89130	0.0673401	0	0	M
CSbapl.31813	0.0714286	0.162153	0.0158064	M
CSbapl.89135	0.0767754	1.63594	0.101948	M
CSbapl.31148	0.148936	0.0589679	0.00602645	M
CSbapl.31149	0.166667	0.248047	0.0233065	M
CSbapl.89139	0.810469	3.09169	0.148199	M
CSbapl.20032	0.0819672	0.493684	0.0422043	M
CSbapl.31141	0.130435	0.117936	0.0117262	M
CSbapl.41553	0.047619	0.452969	0.0392974	M
CSbapl.41550	0.0634921	0	0	M
CSbapl.20035	0.150943	0.138558	0.0136488	M
CSbapl.95805	0.106667	2.27827	0.124886	M
CSbapl.95804	0.142857	0.0276585	0.0028697	M
CSbapl.95807	0.0779221	0.102549	0.0102684	M
CSbapl.84076	0.1	0	0	M
CSbapl.84077	0.166667	0	0	M
CSbapl.30890	0.140351	1.20155	0.0830065	M
CSbapl.30897	0.0980392	0.0453293	0.00466298	M
CSbapl.20039	0.821854	0.275326	0.0255807	M
CSbapl.82362	0.764531	50.4848	0.414557	M
CSbapl.76918	0.128571	0.0133381	0.00139367	M
CSbapl.29293	0.125	0.519411	0.0440005	M
CSbapl.76917	0.81135	0.938254	0.0696089	M
CSbapl.76912	0.727273	0	0	M
CSbapl.19878	0.0434783	0	0	M
CSbapl.43345	0.844911	2.19194	0.122079	M
CSbapl.19870	0.0843585	0	0	M
CSbapl.19871	0.0639535	0.084724	0.00855408	M
CSbapl.19872	0.0967742	0.168582	0.0163866	M
CSbapl.73392	0.117413	0.170777	0.016584	M
CSbapl.19874	0.095941	0	0	M
CSbapl.19875	0.25	0	0	M
CSbapl.19876	0.0437882	0.140292	0.0138089	M
CSbapl.19877	0.111111	0.0319304	0.00330603	M
CSbapl.15070	0.5	87.967	0.47209	M
CSbapl.10144	0.145	0	0	M
CSbapl.30234	0.797554	23.9592	0.3384	M
CSbapl.30233	0.778663	21.9292	0.329477	M
CSbapl.85307	0.0285714	1.74381	0.106166	M
CSbapl.85304	0.86268	13.1383	0.278618	M
CSbapl.85301	0.114983	0.102489	0.0102628	M
CSbapl.51372	0.1	0	0	M
CSbapl.19294	0.774436	63.8707	0.438866	M
CSbapl.19290	0.0652174	0.965377	0.0710706	M
CSbapl.19291	0.147541	56.3587	0.425921	M
CSbapl.19292	0.1	0.66738	0.0537753	M
CSbapl.15732	0.0933333	0.0898095	0.00904606	M
CSbapl.15730	0.190476	0.187315	0.0180594	M
CSbapl.15737	0.113452	0	0	M
CSbapl.15736	0.830007	0.569956	0.0474426	M
CSbapl.15735	0.143511	0.947929	0.0701327	M
CSbapl.15734	0.0833333	0	0	M
CSbapl.48544	0.0461538	0	0	M
CSbapl.15738	0.15331	0	0	M
CSbapl.48543	0.0416667	0	0	M
CSbapl.48540	0.0483092	0.0936575	0.0094168	M
CSbapl.48541	0.0833333	0	0	M
CSbapl.51378	0.70318	41.5806	0.394584	M
CSbapl.12962	0.784784	1.76663	0.107038	M
CSbapl.19128	0.142857	0.139734	0.0137575	M
CSbapl.19129	0.157895	0.0862103	0.00869812	M
CSbapl.19122	0.117647	0.0270495	0.00280735	M
CSbapl.19121	0.684737	4.95791	0.187723	M
CSbapl.19126	0.190476	0.0106826	0.00111767	M
CSbapl.19125	0.0408163	0.486728	0.0417133	M
CSbapl.1620	0.114706	0.154638	0.0151239	M
CSbapl.1623	0.103037	3.13691	0.149355	M
CSbapl.1624	0.407025	0.905371	0.0678092	M
CSbapl.1626	0.217129	0.657946	0.0531785	M
CSbapl.34086	0.705882	0.714688	0.0567181	M
CSbapl.72111	0.802817	16.9745	0.303869	M
CSbapl.72113	0.800439	29.8663	0.360743	M
CSbapl.9452	0.105263	0	0	M
CSbapl.72116	0.142857	0.0993979	0.00996744	M
CSbapl.72117	0.891648	8.15681	0.232928	M
CSbapl.72118	0.809053	52.925	0.419428	M
CSbapl.72119	0.865385	1.18317	0.0821248	M
CSbapl.61800	0.0972089	0	0	M
CSbapl.9458	0.884615	1.49161	0.0960249	M
CSbapl.65985	0.130435	0.193026	0.0185641	M
CSbapl.87568	0.900143	3.09636	0.148319	M
CSbapl.65989	0.0625	0.0356869	0.00368823	M
CSbapl.97519	0.406557	4.53717	0.180019	M
CSbapl.58059	0.82488	5.3626	0.194635	M
CSbapl.58058	0.762467	9.63033	0.248623	M
CSbapl.58055	0.1875	0.669447	0.0539056	M
CSbapl.97513	0.166667	0.167522	0.0162912	M
CSbapl.58056	0.199216	9.30749	0.245379	M
CSbapl.97515	0.473676	3.91398	0.167461	M
CSbapl.97514	0.0677966	0.0947499	0.00952182	M
CSbapl.58053	0.0882353	1.80266	0.108399	M
CSbapl.36309	0.0793651	0.0182732	0.00190468	M
CSbapl.36308	0.0645161	0.179316	0.0173484	M
CSbapl.23280	0.444954	0.126881	0.0125645	M
CSbapl.39178	0.815473	9.84265	0.250703	M
CSbapl.33157	0.133333	0.143722	0.0141248	M
CSbapl.39172	0.881261	1.28007	0.0866927	M
CSbapl.96640	0.0588235	0	0	M
CSbapl.39170	0.751248	0.412717	0.0363423	M
CSbapl.36305	0.115942	0.0194101	0.00202205	M
CSbapl.36304	0.0833333	0	0	M
CSbapl.96644	0.273117	0.945548	0.0700041	M
CSbapl.39174	0.309007	1.09116	0.0775957	M
CSbapl.782	0.985714	0.210396	0.0200845	M
CSbapl.783	0.75794	10.3137	0.255176	M
CSbapl.781	0.82642	18.6845	0.313428	M
CSbapl.787	0.828864	8.03354	0.231503	M
CSbapl.785	0.720971	12.7235	0.275487	M
CSbapl.789	0.696837	18.1367	0.31046	M
CSbapl.91917	0.851959	19.6308	0.318367	M
CSbapl.91916	0.0862944	4.66066	0.182339	M
CSbapl.91912	0.0638456	3.45784	0.157214	M
CSbapl.22484	0.083682	0	0	M
CSbapl.22483	0.33758	0	0	M
CSbapl.91919	0.161125	12.2953	0.272152	M
CSbapl.22480	0.107955	0	0	M
CSbapl.67855	0.0297872	0.157333	0.0153692	M
CSbapl.7503	0.15	0.279427	0.0259184	M
CSbapl.67859	0.0882353	0	0	M
CSbapl.17609	0.0898876	0.0578116	0.00591154	M
CSbapl.17607	0.111111	0.0432316	0.00445169	M
CSbapl.24885	0.0994764	9.93781	0.251622	M
CSbapl.24887	0.192518	0.21397	0.0203946	M
CSbapl.24886	0.106855	1.59902	0.100464	M
CSbapl.13779	0.2	13.6502	0.28236	M
CSbapl.24880	0.753614	0.660741	0.0533557	M
CSbapl.29871	0.106383	0.130523	0.0129039	M
CSbapl.29870	0.0969512	0.263645	0.0246129	M
CSbapl.13775	0.144828	0	0	M
CSbapl.12709	0.2	0.0539715	0.005529	M
CSbapl.13771	0.0321583	0.0625926	0.00638586	M
CSbapl.13770	0.0394089	0	0	M
CSbapl.29879	0.111111	0.0846526	0.00854716	M
CSbapl.29878	0.2	0.144529	0.014199	M
CSbapl.22734	0.236261	0.420788	0.0369416	M
CSbapl.22736	0.319549	1.76969	0.107154	M
CSbapl.22731	0.3	0	0	M
CSbapl.22732	0.538756	2.73095	0.138491	M
CSbapl.101109	0.265823	1.54939	0.0984361	M
CSbapl.101107	0.142857	0	0	M
CSbapl.24771	0.0769231	0	0	M
CSbapl.38220	0.130435	4.08414	0.171041	M
CSbapl.24776	0.0833333	1.76624	0.107023	M
CSbapl.24775	0.0769231	1.02337	0.0741295	M
CSbapl.38223	0.163421	0.801089	0.0618889	M
CSbapl.35653	0.0568769	0.0321182	0.00332518	M
CSbapl.35650	0.0704225	0	0	M
CSbapl.35651	0.0530871	0	0	M
CSbapl.35656	0.097561	0	0	M
CSbapl.38229	0.0554217	0.552907	0.0462941	M
CSbapl.94730	0.0814815	0	0	M
CSbapl.94731	0.162896	0	0	M
CSbapl.80215	0.0571429	0	0	M
CSbapl.80212	0.0647482	0.059028	0.00603242	M
CSbapl.94735	0.206193	11.0134	0.261488	M
CSbapl.80211	0.0810811	0	0	M
CSbapl.94739	0.818952	8.12189	0.232526	M
CSbapl.80219	0.0343643	0.167206	0.0162627	M
CSbapl.46912	0.746867	0.0724439	0.00735652	M
CSbapl.46917	0.825722	31.6165	0.366544	M
CSbapl.46916	0.615385	7.20805	0.221423	M
CSbapl.46915	0.909091	2.12884	0.119978	M
CSbapl.46914	0.853868	6.31481	0.209304	M
CSbapl.72754	0.79191	0.617978	0.0506118	M
CSbapl.11609	0.781264	20.751	0.323929	M
CSbapl.60858	0.74126	3.31878	0.15388	M
CSbapl.60859	0.111111	0.153728	0.015041	M
CSbapl.11603	0.105263	0.338814	0.0306908	M
CSbapl.11602	0.517647	0	0	M
CSbapl.11601	0.142857	0	0	M
CSbapl.11607	0.102489	0.251972	0.0236368	M
CSbapl.60853	0.0970874	0	0	M
CSbapl.11604	0.2	0	0	M
CSbapl.3973	0.702241	12.3738	0.272771	M
CSbapl.10955	0.805736	23.9397	0.338318	M
CSbapl.10956	0.911765	181.3	0.547547	M
CSbapl.3977	0.670732	0	0	M
CSbapl.10951	0.853135	201.327	0.558511	M
CSbapl.52180	0.767589	4.85149	0.185827	M
CSbapl.61727	0.105263	1.23228	0.0844646	M
CSbapl.61726	0.111111	0.0743677	0.00754504	M
CSbapl.61725	0.0316667	0.0921534	0.00927205	M
CSbapl.3978	0.892473	0.241391	0.022744	M
CSbapl.61722	0.0857143	0.0589458	0.00602425	M
CSbapl.61720	0.141762	0.246827	0.0232037	M
CSbapl.93420	0.868895	15.1966	0.292914	M
CSbapl.93423	0.76172	6.0489	0.205409	M
CSbapl.93422	0.795834	5.80683	0.201734	M
CSbapl.93426	0.177986	0.374402	0.0334502	M
CSbapl.93429	0.061674	0.314811	0.0287879	M
CSbapl.69533	0.838013	0.932611	0.0693023	M
CSbapl.69530	0.28	0.252726	0.0237001	M
CSbapl.69531	0.712352	4.57319	0.180701	M
CSbapl.65127	0.815407	0.48136	0.0413328	M
CSbapl.69534	0.803595	0.304637	0.0279708	M
CSbapl.6250	0.0925926	0.270217	0.0251586	M
CSbapl.28087	0.0526316	0.17698	0.0171398	M
CSbapl.81165	0.0834897	3.15738	0.149874	M
CSbapl.81162	0.0592885	1.53699	0.0979233	M
CSbapl.81160	0.394483	5.98627	0.204471	M
CSbapl.81169	0.105769	0	0	M
CSbapl.99908	0.479151	1.01782	0.0738405	M
CSbapl.90735	0.0787402	0	0	M
CSbapl.90736	0.0789474	0	0	M
CSbapl.90737	0.788722	21.0701	0.325461	M
CSbapl.90730	0.0933333	0.0393119	0.00405575	M
CSbapl.90731	0.121318	1.50764	0.0966994	M
CSbapl.90738	0.153846	0.0833939	0.00842503	M
CSbapl.90739	0.805556	0.443072	0.0385785	M
CSbapl.21612	0.0537634	0.123882	0.0122842	M
CSbapl.21611	0.176991	1.41234	0.0926241	M
CSbapl.21617	0.181818	0.229095	0.021697	M
CSbapl.21616	0.142553	0	0	M
CSbapl.21615	0.0714286	0.0729038	0.00740162	M
CSbapl.21614	0.0316623	0.117936	0.0117262	M
CSbapl.21618	0.2	0	0	M
CSbapl.92772	0.0759494	0.0497717	0.00510904	M
CSbapl.92776	0.741235	1.79053	0.107942	M
CSbapl.92777	0.0638298	6.13501	0.206686	M
CSbapl.92774	0.722741	0.386556	0.0343763	M
CSbapl.67072	0.126437	0.146367	0.0143678	M
CSbapl.92778	0.791849	4.82801	0.185404	M
CSbapl.67078	0.793324	0.561513	0.0468755	M
CSbapl.90883	0.166667	0	0	M
CSbapl.90886	0.806128	36.2919	0.380635	M
CSbapl.90887	0.90625	0	0	M
CSbapl.63762	0.131579	0.0969866	0.0097365	M
CSbapl.90889	0.125	0.209385	0.0199966	M
CSbapl.63768	0.0909091	0.0242467	0.00251991	M
CSbapl.59046	0.710535	7.79992	0.228746	M
CSbapl.53024	0.0335196	0	0	M
CSbapl.53029	0.0375084	0.310646	0.0284542	M
CSbapl.92488	0.845696	22.5429	0.332255	M
CSbapl.57910	0.812468	27.7038	0.353103	M
CSbapl.57912	0.797619	5.35031	0.194432	M
CSbapl.19177	0.20398	0.150632	0.0147584	M
CSbapl.8553	0.047489	9.88079	0.251072	M
CSbapl.92484	0.734816	752.434	0.696801	M
CSbapl.92485	0.800357	37.9183	0.385125	M
CSbapl.92486	0.786594	26.9701	0.35038	M
CSbapl.92487	0.0578512	5.31309	0.193813	M
CSbapl.25912	0.105263	0.279408	0.0259169	M
CSbapl.25919	0.833713	13.3648	0.280291	M
CSbapl.29020	0.67408	3.26405	0.152539	M
CSbapl.29023	0.4	0	0	M
CSbapl.29024	0.688857	2.1507	0.120711	M
CSbapl.29027	0.819303	9.93404	0.251586	M
CSbapl.86306	0.081448	1.20137	0.0829979	M
CSbapl.29029	0.79852	9.85192	0.250793	M
CSbapl.65735	0.149495	0.324704	0.0295764	M
CSbapl.27518	0.10127	0.0961129	0.00965269	M
CSbapl.27516	0.106061	0.323136	0.0294518	M
CSbapl.27512	0.0555556	0.39099	0.0347122	M
CSbapl.44663	0.0271399	0.0957271	0.00961566	M
CSbapl.44661	0.0833333	0	0	M
CSbapl.44660	0.0677966	1.08845	0.0774592	M
CSbapl.44667	0.0276817	1.6526	0.10261	M
CSbapl.44666	0.0377358	0.385411	0.0342894	M
CSbapl.44669	0.0245262	0.413753	0.0364195	M
CSbapl.44668	0.0238663	0	0	M
CSbapl.99702	0.783568	12.5394	0.274066	M
CSbapl.45399	0.083045	0.394581	0.0349833	M
CSbapl.54247	0.0365854	0	0	M
CSbapl.99707	0.05	0	0	M
CSbapl.99704	0.806824	13.6437	0.282313	M
CSbapl.45390	0.736162	22.3837	0.331542	M
CSbapl.99708	0.0642055	0	0	M
CSbapl.54248	0.0221519	0.0326873	0.00338316	M
CSbapl.54249	0.0381679	0.0614249	0.00627021	M
CSbapl.45396	0.0882353	0	0	M
CSbapl.32551	0.755683	1.24933	0.0852647	M
CSbapl.42629	0.100334	0.134018	0.0132286	M
CSbapl.42621	0.769647	25.5781	0.34501	M
CSbapl.42624	0.05	0	0	M
CSbapl.42626	0.097561	0	0	M
CSbapl.5469	0.716059	4.18431	0.173093	M
CSbapl.52371	0.0833333	0	0	M
CSbapl.88411	0.295082	0.0933036	0.00938276	M
CSbapl.5463	0.094768	3.41017	0.156083	M
CSbapl.5461	0.754638	75.5016	0.456213	M
CSbapl.5460	0.0702341	3.26891	0.152659	M
CSbapl.82531	0.0317003	0.054939	0.00562551	M
CSbapl.82533	0.748617	7.3987	0.223838	M
CSbapl.51542	0.754208	4.58783	0.180977	M
CSbapl.51545	0.78528	1.66195	0.10298	M
CSbapl.66847	0.641711	0.126134	0.0124948	M
CSbapl.66843	0.817802	8.23496	0.233822	M
CSbapl.66841	0.0782998	1.90841	0.112294	M
CSbapl.66840	0.124378	2.80964	0.140686	M
CSbapl.57263	0.407692	4.20606	0.173534	M
CSbapl.57267	0.0191061	0.434294	0.0379367	M
CSbapl.57266	0.0640474	0.469166	0.0404634	M
CSbapl.57265	0.1575	0.139541	0.0137396	M
CSbapl.57264	0.797982	7.34593	0.223175	M
CSbapl.57268	0.0330739	0.268462	0.0250131	M
CSbapl.50421	0.128571	0.421078	0.036963	M
CSbapl.28868	0.2	1.26469	0.0859806	M
CSbapl.28867	0.56	0.0203618	0.00212021	M
CSbapl.28866	0.451429	0.170775	0.0165838	M
CSbapl.28865	0.682382	0.531869	0.0448594	M
CSbapl.56794	0.722399	0.821898	0.0630972	M
CSbapl.28862	0.0789474	7.44323	0.224394	M
CSbapl.28861	0.103896	4.39672	0.177317	M
CSbapl.81945	0.792363	0.787984	0.0611208	M
CSbapl.28553	0.0789474	0.0583967	0.0059697	M
CSbapl.81947	0.742927	0.644275	0.0523076	M
CSbapl.81946	0.148148	0	0	M
CSbapl.45539	0.841676	14.5447	0.288593	M
CSbapl.45534	0.0869565	0	0	M
CSbapl.45535	0.0362538	0.0597722	0.0061063	M
CSbapl.45536	0.0454545	0.0799453	0.00808968	M
CSbapl.45537	0.0523256	0.0132415	0.00138364	M
CSbapl.81949	0.780384	6.30459	0.209157	M
CSbapl.31300	0.72604	9.94277	0.25167	M
CSbapl.31301	0.328571	0	0	M
CSbapl.31307	0.0983213	1.06991	0.0765211	M
CSbapl.2167	0.151042	0	0	M
CSbapl.2165	0.2	0	0	M
CSbapl.2163	0.0909091	14.5172	0.288407	M
CSbapl.81473	0.795433	20.5107	0.32276	M
CSbapl.2161	0.166667	0.386695	0.0343869	M
CSbapl.2160	0.102041	0.478432	0.0411248	M
CSbapl.84279	0.256881	0.628612	0.0513008	M
CSbapl.28558	0.748385	1.19858	0.0828646	M
CSbapl.40507	0.770472	2.93946	0.144211	M
CSbapl.84271	0.029703	0	0	M
CSbapl.55688	0.0747664	0.223352	0.0212044	M
CSbapl.56139	0.0512821	0.0823574	0.00832435	M
CSbapl.56136	0.134615	0.0674085	0.0068615	M
CSbapl.55535	0.124138	0.0979533	0.00982914	M
CSbapl.53560	0.2	0.113305	0.0112897	M
CSbapl.53561	0.2	0	0	M
CSbapl.53569	0.097561	0	0	M
CSbapl.2784	0.216561	0.107061	0.010698	M
CSbapl.84899	0.111111	0.856373	0.0650689	M
CSbapl.89449	0.069948	0.188977	0.0182065	M
CSbapl.89446	0.0769231	0	0	M
CSbapl.78984	0.0784314	333.906	0.61152	M
CSbapl.78981	0.78555	4.28415	0.1751	M
CSbapl.78983	0.767624	4.71289	0.183305	M
CSbapl.78982	0.795284	4.09966	0.171362	M
CSbapl.48708	0.826354	6.21055	0.207794	M
CSbapl.48709	0.780801	13.4519	0.280926	M
CSbapl.3783	0.0735294	6.00447	0.204744	M
CSbapl.3784	0.0740741	123.654	0.507566	M
CSbapl.48700	0.828571	2.89582	0.143039	M
CSbapl.48701	0.829256	19.5431	0.317919	M
CSbapl.48702	0.808442	3.95353	0.168304	M
CSbapl.48706	0.78051	43.4537	0.399112	M
CSbapl.47701	0.2	0	0	M
CSbapl.40571	0.410853	2.72525	0.13833	M
CSbapl.40570	0.362952	17.4351	0.306531	M
CSbapl.47705	0.2	0.0404999	0.00417591	M
CSbapl.47704	0.0882353	0	0	M
CSbapl.40575	0.784164	4.75691	0.184113	M
CSbapl.40574	0.801657	2.49758	0.131697	M
CSbapl.41626	0.16	0	0	M
CSbapl.41620	0.1	0	0	M
CSbapl.41622	0.062201	0.299824	0.0275821	M
CSbapl.72352	0.0689076	0.0474782	0.00487898	M
CSbapl.72353	0.221021	1.11366	0.0787213	M
CSbapl.72351	0.150628	1.13334	0.0796963	M
CSbapl.4789	0.0877193	0.637579	0.0518784	M
CSbapl.77187	0.0727273	0	0	M
CSbapl.4787	0.025	0	0	M
CSbapl.72359	0.130435	0.0548753	0.00561916	M
CSbapl.4781	0.0833333	0.0809998	0.00819234	M
CSbapl.4783	0.0909091	1.45531	0.094481	M
CSbapl.68913	0.0673195	0.524595	0.0443588	M
CSbapl.68912	0.722423	58.2368	0.42931	M
CSbapl.68910	0.816676	17.9199	0.309261	M
CSbapl.37070	0.107143	0.527873	0.0445847	M
CSbapl.37074	0.2	0	0	M
CSbapl.40399	0.0449735	0.533202	0.044951	M
CSbapl.37077	0.14094	0.20244	0.0193908	M
CSbapl.37078	0.806691	31.0348	0.364652	M
CSbapl.77457	0.0160099	0	0	M
CSbapl.4257	0.661412	1.64141	0.102166	M
CSbapl.4256	0.432191	0.937932	0.0695915	M
CSbapl.4255	0.811973	3.52073	0.158687	M
CSbapl.4254	0.1	0.47347	0.0407711	M
CSbapl.4253	0.0851064	0	0	M
CSbapl.4252	0.1	0.216241	0.0205912	M
CSbapl.4250	0.0972222	0	0	M
CSbapl.74197	0.66203	96.3366	0.481547	M
CSbapl.74193	0.104167	1.3227	0.0886412	M
CSbapl.33791	0.816223	23.1912	0.335113	M
CSbapl.33792	0.819289	3.24116	0.151973	M
CSbapl.81280	0.716834	4.06694	0.170685	M
CSbapl.33797	0.0769231	0.174046	0.0168773	M
CSbapl.70864	0.0331633	0.117351	0.0116712	M
CSbapl.70863	0.146939	0.0805572	0.00814927	M
CSbapl.70860	0.163265	0	0	M
CSbapl.36671	0.744529	6.34791	0.209779	M
CSbapl.36670	0.717203	2.91764	0.143627	M
CSbapl.36672	0.142857	4.47077	0.17875	M
CSbapl.17269	0.806192	4.90083	0.18671	M
CSbapl.6303	0.0882353	3.67732	0.162269	M
CSbapl.90306	0.0826972	0.337959	0.0306236	M
CSbapl.71119	0.105263	0	0	M
CSbapl.71118	0.160344	0.428663	0.037523	M
CSbapl.71111	0.0794393	0.352783	0.0317826	M
CSbapl.71110	0.0457516	0.428163	0.0374861	M
CSbapl.76325	0.219101	0	0	M
CSbapl.71112	0.125	0	0	M
CSbapl.76323	0.0833333	0	0	M
CSbapl.70249	0.88	3.61921	0.160954	M
CSbapl.24578	0.0909091	1.91467	0.11252	M
CSbapl.70243	0.819908	13.4633	0.281009	M
CSbapl.70240	0.684478	3.79072	0.164789	M
CSbapl.24576	0.0800451	1.44993	0.0942503	M
CSbapl.70244	0.854711	37.4346	0.383809	M
CSbapl.24572	0.756073	2.53742	0.132888	M
CSbapl.64118	0.09375	0	0	M
CSbapl.78470	0.113744	0.0948037	0.00952698	M
CSbapl.64113	0.0813772	0.0809998	0.00819234	M
CSbapl.64112	0.0963855	0	0	M
CSbapl.64111	0.835479	287.736	0.595917	M
CSbapl.64110	0.171875	0.0583967	0.0059697	M
CSbapl.9200	0.792592	5.01726	0.188765	M
CSbapl.78247	0.82649	66.7421	0.443422	M
CSbapl.88188	0.751869	4.0525	0.170385	M
CSbapl.73579	0.0987005	53.7914	0.421105	M
CSbapl.35323	0.0543478	0	0	M
CSbapl.35326	0.153846	0	0	M
CSbapl.35327	0.113924	0	0	M
CSbapl.35324	0.0543478	0	0	M
CSbapl.75741	0.04	0.223317	0.0212013	M
CSbapl.35329	0.133333	0	0	M
CSbapl.75747	0.263061	0	0	M
CSbapl.38877	0.111111	0	0	M
CSbapl.87203	0.843178	13.2675	0.279575	M
CSbapl.87204	0.813299	37.533	0.384078	M
CSbapl.87205	0.783784	0.26139	0.024425	M
CSbapl.87206	0.162791	0.279604	0.025933	M
CSbapl.87207	0.0769231	0.0524625	0.0053783	M
CSbapl.87208	0.84906	84.823	0.468306	M
CSbapl.87209	0.0943396	2.04916	0.117265	M
CSbapl.88452	0.519042	1.161	0.0810513	M
CSbapl.88454	0.142857	1.88758	0.111538	M
CSbapl.69735	0.172117	0.369234	0.033054	M
CSbapl.69736	0.111111	0.0383164	0.00395495	M
CSbapl.69737	0.1	0.0607572	0.00620402	M
CSbapl.69730	0.510182	4.7189	0.183416	M
CSbapl.69731	0.0722892	0.328279	0.0298599	M
CSbapl.69733	0.116608	0.220183	0.0209316	M
CSbapl.69739	0.133333	0.248855	0.0233745	M
CSbapl.75305	0.0357143	0.65633	0.0530759	M
CSbapl.62616	0.832669	0.360432	0.0323756	M
CSbapl.62617	0.815115	0.0377999	0.00390262	M
CSbapl.62610	0.641321	0.288751	0.0266822	M
CSbapl.67821	0.127135	0	0	M
CSbapl.65648	0.102467	2.25396	0.124103	M
CSbapl.62619	0.116927	0.122073	0.0121148	M
CSbapl.69881	0.799082	24.002	0.33858	M
CSbapl.69884	0.0769231	0.658208	0.0531951	M
CSbapl.67325	0.0833333	0	0	M
CSbapl.65393	0.105263	0.0963527	0.0096757	M
CSbapl.65391	0.0952381	0	0	M
CSbapl.65394	0.60241	0.853812	0.0649237	M
CSbapl.65395	0.878788	0.0965679	0.00969634	M
CSbapl.76741	0.366071	0.385474	0.0342942	M
CSbapl.11049	0.632449	12.643	0.274868	M
CSbapl.30918	0.804711	1.30243	0.087719	M
CSbapl.30919	0.718153	0.842984	0.0643076	M
CSbapl.30917	0.781797	6.30542	0.209169	M
CSbapl.82396	0.0278069	0.143625	0.014116	M
CSbapl.13958	0.0666667	0.520622	0.0440843	M
CSbapl.13956	0.101266	0.0695482	0.00707213	M
CSbapl.98349	0.0781711	0	0	M
CSbapl.30158	0.778388	84.5056	0.467916	M
CSbapl.19782	0.0194346	0.283756	0.0262738	M
CSbapl.20984	0.215754	0.633911	0.0516425	M
CSbapl.20985	0.829	2.96091	0.144782	M
CSbapl.20987	0.823681	0.208635	0.0199314	M
CSbapl.19629	0.382716	0.119191	0.0118443	M
CSbapl.21055	0.0542986	0.430496	0.0376578	M
CSbapl.19620	0.105263	0.413196	0.036378	M
CSbapl.21057	0.0551724	0.209944	0.0200452	M
CSbapl.19622	0.0868201	0.409639	0.0361129	M
CSbapl.19625	0.230769	0.0409976	0.00422621	M
CSbapl.19624	0.2	0.144529	0.014199	M
CSbapl.19627	0.61745	7.87503	0.22964	M
CSbapl.21052	0.777446	0.866606	0.0656472	M
CSbapl.64939	0.142857	0	0	M
CSbapl.64938	0.128713	2.5407	0.132986	M
CSbapl.13488	0.829402	0.624599	0.0510414	M
CSbapl.9555	0.761884	0.854049	0.0649372	M
CSbapl.13483	0.910256	0.181439	0.0175375	M
CSbapl.14450	0.460391	2.20623	0.122549	M
CSbapl.9559	0.119497	4.825	0.18535	M
CSbapl.13480	0.16129	0	0	M
CSbapl.13487	0.971014	2.06962	0.117969	M
CSbapl.14454	0.0930233	0.603616	0.0496739	M
CSbapl.14456	0.894891	8.25721	0.234075	M
CSbapl.38857	0.0972171	16.8718	0.303267	M
CSbapl.38854	0.125	0	0	M
CSbapl.38850	0.125	0.0661829	0.00674066	M
CSbapl.38858	0.125926	0.20481	0.0195979	M
CSbapl.27066	0.119565	1.08864	0.077469	M
CSbapl.42428	0.0980392	1.31949	0.0884956	M
CSbapl.97498	0.807269	6.27672	0.208755	M
CSbapl.27063	0.837967	20.0815	0.32064	M
CSbapl.27060	0.0555556	0.286252	0.026478	M
CSbapl.27061	0.813438	4.85968	0.185974	M
CSbapl.97497	0.2	0.643599	0.0522643	M
CSbapl.97490	0.148148	2.39615	0.128601	M
CSbapl.97492	0.134615	0.747229	0.0586955	M
CSbapl.97493	0.15625	0.308933	0.0283166	M
CSbapl.23981	0.0540825	0.344044	0.0311009	M
CSbapl.15508	0.66036	5.59173	0.198356	M
CSbapl.23987	0.034965	0	0	M
CSbapl.15504	0.789041	12.9281	0.277043	M
CSbapl.15502	0.833509	0.0205013	0.00213458	M
CSbapl.15503	0.855029	27.0504	0.350681	M
CSbapl.59539	0.0566802	0.31154	0.0285259	M
CSbapl.59538	0.309013	0.168306	0.0163617	M
CSbapl.1789	0.075	0	0	M
CSbapl.59535	0.172414	0	0	M
CSbapl.1787	0.043956	0	0	M
CSbapl.1784	0.0416667	0	0	M
CSbapl.1785	0.0526316	0	0	M
CSbapl.1782	0.0750971	3.50401	0.158298	M
CSbapl.42390	0.102919	1.33536	0.0892131	M
CSbapl.97729	0.1	0.578116	0.047988	M
CSbapl.42395	0.11726	0.691892	0.0553104	M
CSbapl.42396	0.0892857	0.0298861	0.00309746	M
CSbapl.97726	0.551398	2.22136	0.123044	M
CSbapl.97727	0.366187	0.991827	0.0724768	M
CSbapl.97724	0.225627	65.4441	0.441387	M
CSbapl.10367	0.09375	0	0	M
CSbapl.10366	0.0901126	0.222416	0.0211239	M
CSbapl.10362	0.0414938	3.58618	0.160199	M
CSbapl.6067	0.814707	1.4643	0.0948657	M
CSbapl.6065	0.736031	24.819	0.341962	M
CSbapl.18176	0.741977	6.95802	0.218169	M
CSbapl.18177	0.694797	13.2529	0.279468	M
CSbapl.18174	0.14185	0.412014	0.03629	M
CSbapl.18178	0.418182	0.161974	0.0157901	M
CSbapl.6069	0.806289	8.89912	0.241127	M
CSbapl.7337	0.0980392	0.776525	0.0604445	M
CSbapl.7332	0.771446	8.55648	0.237422	M
CSbapl.7338	0.101604	0.296777	0.0273352	M
CSbapl.23364	0.077246	0.100061	0.0100308	M
CSbapl.23361	0.102041	0	0	M
CSbapl.60134	0.7	0.0565093	0.00578196	M
CSbapl.60136	0.0864	0.721373	0.0571274	M
CSbapl.60131	0.405941	1.14892	0.0804618	M
CSbapl.60130	0.233866	9.35965	0.24591	M
CSbapl.60132	0.81511	2.02697	0.116497	M
CSbapl.628	0.0697674	0.0536072	0.00549263	M
CSbapl.620	0.816451	12.2072	0.271453	M
CSbapl.95380	0.830588	4.12852	0.171955	M
CSbapl.622	0.125	0.585496	0.0484787	M
CSbapl.18284	0.789599	10.3441	0.255458	M
CSbapl.95387	0.230298	0.050216	0.00515354	M
CSbapl.95384	0.95311	4.99955	0.188455	M
CSbapl.626	0.616011	0.0496372	0.00509556	M
CSbapl.91898	0.567873	5.05886	0.18949	M
CSbapl.91899	0.0769231	0.136805	0.0134867	M
CSbapl.34808	0.111111	0.181506	0.0175435	M
CSbapl.91892	0.854321	4.0281	0.169875	M
CSbapl.91893	0.135338	0.359001	0.0322649	M
CSbapl.91891	0.587635	0.877845	0.0662786	M
CSbapl.53	0.125	0.0667057	0.00679222	M
CSbapl.52	0.144231	0.0566999	0.00580093	M
CSbapl.50	0.1	0.223847	0.021247	M
CSbapl.30840	0.653258	0.606897	0.0498889	M
CSbapl.26858	0.142857	0	0	M
CSbapl.99985	0.109259	113.295	0.498441	M
CSbapl.99981	0.0378072	106.327	0.491824	M
CSbapl.26850	0.0769231	0.552872	0.0462918	M
CSbapl.26852	0.813422	0.637589	0.051879	M
CSbapl.99988	0.0891089	3.08941	0.14814	M
CSbapl.26855	0.166667	0.270634	0.0251931	M
CSbapl.83976	0.0925926	0.0391034	0.00403464	M
CSbapl.33125	0.0841446	0.243453	0.0229186	M
CSbapl.95654	0.052	0	0	M
CSbapl.33123	0.0922509	0.042362	0.00436398	M
CSbapl.91760	0.0759494	26.2204	0.347522	M
CSbapl.91761	0.545337	5.77847	0.201295	M
CSbapl.96617	0.852966	0.302135	0.027769	M
CSbapl.91766	0.82292	2.19111	0.122051	M
CSbapl.91767	0.736718	2388.09	0.818186	M
CSbapl.15773	0.76853	0.404913	0.0357597	M
CSbapl.18828	0.0722829	0	0	M
CSbapl.18829	0.118439	5.19977	0.191908	M
CSbapl.17839	0.0892857	0.327603	0.0298063	M
CSbapl.17836	0.226933	0.0219701	0.00228587	M
CSbapl.17837	0.387281	3.66027	0.161885	M
CSbapl.17834	0.139535	1.94479	0.113602	M
CSbapl.18821	0.0644273	1.24924	0.0852609	M
CSbapl.18822	0.0882319	2.09292	0.118764	M
CSbapl.78401	0.0319635	0	0	M
CSbapl.13108	0.649351	0.111193	0.0110899	M
CSbapl.13109	0.760642	0.202073	0.0193587	M
CSbapl.13107	0.407251	0.762283	0.0595979	M
CSbapl.98585	0.176471	0.0306486	0.0031753	M
CSbapl.13103	0.269691	0.142409	0.014004	M
CSbapl.98581	0.0680428	0.0360317	0.00372325	M
CSbapl.35604	0.0572519	0	0	M
CSbapl.38275	0.520202	1.28577	0.0869555	M
CSbapl.46898	0.0714286	0.0866681	0.00874244	M
CSbapl.46899	0.796059	7.38549	0.223672	M
CSbapl.100043	0.106796	2.24999	0.123975	M
CSbapl.100041	0.157895	0.0925439	0.00930965	M
CSbapl.46892	0.77753	90.4064	0.474936	M
CSbapl.59722	0.697869	5.3744	0.19483	M
CSbapl.46890	0.741002	6.10226	0.206203	M
CSbapl.3546	0.77782	1.92642	0.112944	M
CSbapl.38074	0.775588	71.4133	0.450436	M
CSbapl.38077	0.697674	0.0691151	0.00702953	M
CSbapl.3545	0.824341	5.77305	0.201211	M
CSbapl.80148	0.153846	2.26358	0.124413	M
CSbapl.98632	0.121212	0	0	M
CSbapl.98639	0.130435	0.091366	0.00919619	M
CSbapl.98638	0.308252	24.7364	0.341625	M
CSbapl.3548	0.827807	3.15579	0.149834	M
CSbapl.3549	0.779827	9.00414	0.242237	M
CSbapl.80406	0.747352	5.68124	0.199775	M
CSbapl.80402	0.0882353	2.19566	0.122201	M
CSbapl.80401	0.0819912	0.0358039	0.00370012	M
CSbapl.80147	0.15625	0.231167	0.0218742	M
CSbapl.20045	0.0545455	0	0	M
CSbapl.25036	0.0846561	0.0498638	0.00511827	M
CSbapl.25035	0.81882	4.89141	0.186542	M
CSbapl.20046	0.0526316	0	0	M
CSbapl.25033	0.814402	63.3542	0.438025	M
CSbapl.25032	0.834053	7.41492	0.224041	M
CSbapl.20042	0.07	0.152631	0.014941	M
CSbapl.82312	0.181818	0	0	M
CSbapl.38169	0.129032	0.0756878	0.0076742	M
CSbapl.86802	0.133333	0.350192	0.031581	M
CSbapl.27897	0.4	0	0	M
CSbapl.51362	0.217974	3.53504	0.15902	M
CSbapl.52949	0.0994764	0	0	M
CSbapl.51365	0.84175	9.59204	0.248243	M
CSbapl.66269	0.08	0.0774883	0.00785011	M
CSbapl.51367	0.749117	6.02901	0.205112	M
CSbapl.51369	0.15625	0.0380692	0.0039299	M
CSbapl.66265	0.109804	2.51865	0.132329	M
CSbapl.66262	0.31543	0.620778	0.0507936	M
CSbapl.66260	0.504673	0.797925	0.061704	M
CSbapl.47270	0.597278	1.5803	0.0997037	M
CSbapl.73227	0.113653	0.117315	0.0116678	M
CSbapl.12271	0.085044	0	0	M
CSbapl.5860	0.0312033	0.460764	0.0398602	M
CSbapl.90964	0.06621	0.0702815	0.00714423	M
CSbapl.90966	0.084878	0	0	M
CSbapl.90961	0.0833333	0	0	M
CSbapl.90963	0.1875	0	0	M
CSbapl.90962	0.106326	0.0785297	0.00795172	M
CSbapl.90969	0.083739	10.3325	0.25535	M
CSbapl.4014	0.336011	6.54271	0.212531	M
CSbapl.4011	0.111111	0	0	M
CSbapl.4010	0.0773839	2.02233	0.116336	M
CSbapl.4013	0.125	0	0	M
CSbapl.54826	0.746445	0.666554	0.0537232	M
CSbapl.68201	0.0416667	0.0882753	0.00889788	M
CSbapl.79100	0.853356	25.5193	0.344777	M
CSbapl.47855	0.0888889	0.914695	0.0683226	M
CSbapl.47857	0.0956708	1.3683	0.0906861	M
CSbapl.47850	0.11841	26.3359	0.347967	M
CSbapl.47853	0.120219	0.0401689	0.00414244	M
CSbapl.47852	0.121124	2.27064	0.124641	M
CSbapl.28545	0.080292	80.567	0.462956	M
CSbapl.39846	0.0892857	0.0349336	0.0036117	M
CSbapl.39843	0.0350877	0	0	M
CSbapl.33801	0.11588	0.298831	0.0275017	M
CSbapl.33800	0.131725	0.180639	0.0174663	M
CSbapl.33803	0.0773196	0	0	M
CSbapl.26078	0.756287	7.42024	0.224107	M
CSbapl.26079	0.476541	2.19463	0.122167	M
CSbapl.33808	0.754042	3.44079	0.156811	M
CSbapl.26072	0.800655	2.16418	0.12116	M
CSbapl.26073	0.834708	0.128751	0.0127389	M
CSbapl.26070	0.824683	5.08348	0.189916	M
CSbapl.83197	0.125	0.113197	0.0112794	M
CSbapl.83190	0.0788991	0.233994	0.0221154	M
CSbapl.83191	0.142857	0.167919	0.0163269	M
CSbapl.83193	0.818828	1.65159	0.10257	M
CSbapl.92523	0.125	0	0	M
CSbapl.92521	0.102258	0.0332932	0.00344486	M
CSbapl.60676	0.676839	2.18747	0.121931	M
CSbapl.99512	0.101695	0.161091	0.0157102	M
CSbapl.99518	0.119658	0	0	M
CSbapl.78277	0.719281	15.6242	0.295655	M
CSbapl.78276	0.105096	1.78769	0.107835	M
CSbapl.78275	0.14	0.36059	0.0323879	M
CSbapl.78270	0.0451613	0	0	M
CSbapl.4902	0.0833333	0	0	M
CSbapl.4900	0.105263	0	0	M
CSbapl.78279	0.0769231	0	0	M
CSbapl.16508	0.0666667	0	0	M
CSbapl.94236	0.801793	4.12013	0.171783	M
CSbapl.16505	0.0780168	0.0615359	0.00628121	M
CSbapl.5055	0.0836431	0.103091	0.0103202	M
CSbapl.6502	0.242424	0.06117	0.00624495	M
CSbapl.42988	0.791713	1.96674	0.114383	M
CSbapl.27308	0.12766	0.144703	0.014215	M
CSbapl.42984	0.0487973	0.117	0.0116381	M
CSbapl.27306	0.419141	0.112912	0.0112525	M
CSbapl.27305	0.318841	6.36219	0.209983	M
CSbapl.27304	0.635591	16.8022	0.302856	M
CSbapl.27302	0.585212	1.9947	0.11537	M
CSbapl.42983	0.129032	0.648738	0.0525927	M
CSbapl.72157	0.0917969	0.201751	0.0193305	M
CSbapl.87445	0.740933	3.58153	0.160092	M
CSbapl.87449	0.166667	0.06523	0.0066466	M
CSbapl.62958	0.166667	0.218649	0.0207992	M
CSbapl.88613	0.0564972	0.0483194	0.00496342	M
CSbapl.88611	0.075188	0.873016	0.0660077	M
CSbapl.88615	0.0546448	0	0	M
CSbapl.88619	0.0969697	0	0	M
CSbapl.31296	0.517766	0.0202778	0.00211155	M
CSbapl.8021	0.883469	13.857	0.283834	M
CSbapl.87998	0.0860465	0.153863	0.0150533	M
CSbapl.12476	0.233333	0	0	M
CSbapl.52125	0.0598911	0.830837	0.063612	M
CSbapl.31292	0.833333	0	0	M
CSbapl.52128	0.158442	38.1984	0.385879	M
CSbapl.87994	0.105263	0	0	M
CSbapl.77224	0.804841	7.46992	0.224726	M
CSbapl.62953	0.78561	54.9526	0.42331	M
CSbapl.62952	0.461396	1.82779	0.109338	M
CSbapl.85597	0.166667	0	0	M
CSbapl.8023	0.800511	37.0712	0.38281	M
CSbapl.77238	0.0810811	0	0	M
CSbapl.77234	0.149254	0	0	M
CSbapl.77235	0.166667	0	0	M
CSbapl.41981	0.347214	1.32264	0.0886382	M
CSbapl.85599	0.101124	0	0	M
CSbapl.60329	0.795434	3.34166	0.154436	M
CSbapl.2084	0.84858	0.772644	0.0602145	M
CSbapl.2085	0.598248	14.0116	0.284923	M
CSbapl.2086	0.109756	0	0	M
CSbapl.2087	0.142857	0	0	M
CSbapl.2080	0.166667	0	0	M
CSbapl.2081	0.496025	0.904754	0.0677751	M
CSbapl.2083	0.85567	5.31792	0.193894	M
CSbapl.2088	0.306306	6.43082	0.210959	M
CSbapl.23439	0.1	0.338201	0.0306427	M
CSbapl.31518	0.125	0.0963245	0.00967299	M
CSbapl.31512	0.0731707	0.108691	0.0108528	M
CSbapl.65948	0.0642202	0	0	M
CSbapl.2338	0.0662651	0.68219	0.0547054	M
CSbapl.2336	0.2	0.362615	0.0325443	M
CSbapl.2334	0.704978	0.623267	0.050955	M
CSbapl.55477	0.1	0	0	M
CSbapl.2332	0.817996	9.87199	0.250987	M
CSbapl.2333	0.714325	11.1336	0.262535	M
CSbapl.55472	0.875648	9.89748	0.251233	M
CSbapl.43169	0.269841	5.94766	0.203888	M
CSbapl.43168	0.102868	1.13332	0.0796954	M
CSbapl.43164	0.849546	5.68547	0.199842	M
CSbapl.100904	0.127753	0	0	M
CSbapl.43166	0.278139	0.791234	0.0613118	M
CSbapl.43161	0.0634921	0.252932	0.0237174	M
CSbapl.43160	0.0882353	0	0	M
CSbapl.43163	0.782718	9.10133	0.243254	M
CSbapl.37916	0.0888889	0.221684	0.0210608	M
CSbapl.37915	0.0320513	0.824726	0.0632603	M
CSbapl.37914	0.117647	0	0	M
CSbapl.37913	0.097561	0.203997	0.0195269	M
CSbapl.37912	0.0625	0.114279	0.0113816	M
CSbapl.37919	0.166667	0.195271	0.0187618	M
CSbapl.37918	0.108108	0.387846	0.0344741	M
CSbapl.75268	0.740962	7.46016	0.224605	M
CSbapl.88601	0.831931	7.01572	0.218929	M
CSbapl.76543	0.12592	0.260113	0.0243185	M
CSbapl.43298	0.0329412	0.237849	0.0224435	M
CSbapl.43293	0.802248	0.199892	0.0191677	M
CSbapl.46660	0.798096	1.84313	0.109907	M
CSbapl.46663	0.825224	9.66182	0.248934	M
CSbapl.46665	0.0992063	0.0699452	0.00711117	M
CSbapl.46666	0.213402	5.73151	0.200563	M
CSbapl.14617	0.1	0	0	M
CSbapl.47137	0.160194	0.3602	0.0323577	M
CSbapl.66532	0.0961538	0	0	M
CSbapl.30649	0.0714286	0.146769	0.0144047	M
CSbapl.3069	0.788043	3.4784	0.157698	M
CSbapl.16815	0.104167	0	0	M
CSbapl.66392	0.238832	1.2633	0.0859164	M
CSbapl.3064	0.104651	0.653182	0.0528758	M
CSbapl.3067	0.769709	47.6125	0.408519	M
CSbapl.3066	0.778553	9.95131	0.251752	M
CSbapl.3061	0.0319149	0.507589	0.043179	M
CSbapl.66391	0.766299	11.0346	0.261673	M
CSbapl.3063	0.0324544	0.632669	0.0515625	M
CSbapl.22216	0.796336	2.18493	0.121847	M
CSbapl.75169	0.125	0.0121335	0.00126856	M
CSbapl.75164	0.716724	4.66689	0.182455	M
CSbapl.22218	0.694675	2.27612	0.124817	M
CSbapl.72567	0.847345	1.70021	0.104482	M
CSbapl.43839	0.0729927	0	0	M
CSbapl.62489	0.816949	5.21744	0.192207	M
CSbapl.48118	0.787557	15.5132	0.294951	M
CSbapl.48115	0.100537	4.67239	0.182557	M
CSbapl.7033	0.663462	0.00250635	0.000263297	M
CSbapl.49240	0.153846	0.121834	0.0120924	M
CSbapl.49241	0.677854	1.11558	0.0788171	M
CSbapl.49246	0.310811	0.0657842	0.00670132	M
CSbapl.49247	0.214286	0	0	M
CSbapl.49245	0.800889	404.276	0.63158	M
CSbapl.65864	0.09	0.0728012	0.00739156	M
CSbapl.28030	0.110317	0.302463	0.0277955	M
CSbapl.68898	0.104762	3.752	0.163935	M
CSbapl.41471	0.166667	0.125404	0.0124266	M
CSbapl.65862	0.105263	0.0316527	0.00327773	M
CSbapl.65863	0.0956072	0.327877	0.029828	M
CSbapl.68890	0.764966	7.04005	0.219248	M
CSbapl.65869	0.12	0.355228	0.0319725	M
CSbapl.68894	0.836755	10.9486	0.260919	M
CSbapl.68895	0.201983	2.87945	0.142596	M
CSbapl.96030	0.0736842	0.1978	0.0189842	M
CSbapl.96033	0.2	0	0	M
CSbapl.96032	0.2	0	0	M
CSbapl.62487	0.0555556	0	0	M
CSbapl.58976	0.934783	0.445946	0.0387878	M
CSbapl.58970	0.129796	0.35338	0.031829	M
CSbapl.60553	0.2	0.25849	0.024183	M
CSbapl.71094	0.234878	0.854823	0.0649811	M
CSbapl.71095	0.379688	0.235826	0.0222715	M
CSbapl.71097	0.40587	0.28268	0.0261855	M
CSbapl.71090	0.789986	11.2215	0.263294	M
CSbapl.71092	0.488873	1.06571	0.0763078	M
CSbapl.68762	0.765332	13.9054	0.284176	M
CSbapl.68766	0.839227	137.19	0.518409	M
CSbapl.23160	0.092437	1.8933	0.111747	M
CSbapl.68768	0.387773	13.3703	0.280331	M
CSbapl.79660	0.181818	0.0217482	0.00226303	M
CSbapl.39136	0.866597	1.07265	0.0766603	M
CSbapl.72678	0.240412	0.7671	0.059885	M
CSbapl.72671	0.0675676	0	0	M
CSbapl.72673	0.105882	4.94971	0.187578	M
CSbapl.72674	0.166667	0	0	M
CSbapl.71322	0.0951157	0.0793234	0.00802909	M
CSbapl.71320	0.104235	0.333351	0.0302607	M
CSbapl.71327	0.111902	0.875579	0.0661516	M
CSbapl.71325	0.111963	0.0903597	0.00909915	M
CSbapl.36734	0.101002	0.562729	0.0469573	M
CSbapl.8810	0.0930233	1.36912	0.0907225	M
CSbapl.8813	0.54114	108.519	0.493951	M
CSbapl.8815	0.780073	51.5309	0.416673	M
CSbapl.8814	0.765107	154.469	0.530801	M
CSbapl.8816	0.153605	125.557	0.50916	M
CSbapl.74789	0.790351	32.8512	0.370453	M
CSbapl.74788	0.803809	9.57022	0.248026	M
CSbapl.35421	0.103507	4.06825	0.170712	M
CSbapl.35423	0.0267007	0.818565	0.0629046	M
CSbapl.32432	0.270833	0.105796	0.0105778	M
CSbapl.35427	0.0571429	0.63671	0.0518226	M
CSbapl.32430	0.181818	0	0	M
CSbapl.35429	0.2	0.0601713	0.00614591	M
CSbapl.91569	0.0838323	5.97364	0.20428	M
CSbapl.32439	0.106667	0	0	M
CSbapl.97815	0.134615	0.111632	0.0111314	M
CSbapl.36880	0.748532	23.054	0.334514	M
CSbapl.53259	0.137041	0.728595	0.0575677	M
CSbapl.36886	1	0.915794	0.068383	M
CSbapl.73788	0.101266	0.0745993	0.00756771	M
CSbapl.73789	0.0963855	0	0	M
CSbapl.9121	0.644863	18.167	0.310626	M
CSbapl.64099	0.142857	0.090718	0.00913372	M
CSbapl.64096	0.606159	10.7037	0.258741	M
CSbapl.64097	0.0870245	1.246	0.085109	M
CSbapl.64094	0.668074	1.90041	0.112005	M
CSbapl.64095	0.682261	6.55194	0.21266	M
CSbapl.64092	0.784562	115.496	0.500447	M
CSbapl.64093	0.0888889	0	0	M
CSbapl.64090	0.117647	0.174461	0.0169145	M
CSbapl.73785	0.111111	0.0606665	0.00619503	M
CSbapl.95711	0.0305164	0	0	M
CSbapl.95716	0.0852713	0.213245	0.0203317	M
CSbapl.24306	0.804403	1052.46	0.732058	M
CSbapl.24307	0.174455	0.00715282	0.000749679	M
CSbapl.24304	0.856939	17.769	0.308419	M
CSbapl.24302	0.10917	1.6961	0.104321	M
CSbapl.24300	0.813898	49.6812	0.412903	M
CSbapl.73251	0.142857	0.726717	0.0574534	M
CSbapl.61572	0.566007	11.9762	0.269597	M
CSbapl.35283	0.0697674	0.0676237	0.0068827	M
CSbapl.73257	0.811815	42.0478	0.395732	M
CSbapl.73258	0.0618956	0	0	M
CSbapl.73259	0.0533333	0	0	M
CSbapl.61578	0.815642	18.8248	0.314175	M
CSbapl.69383	0.781283	0	0	M
CSbapl.69382	0.140684	17.7951	0.308565	M
CSbapl.69385	0.316662	0.922737	0.0687635	M
CSbapl.34489	0.100358	0.091565	0.00921536	M
CSbapl.34480	0.0634921	1.03019	0.0744834	M
CSbapl.34485	0.0666667	0.317515	0.029004	M
CSbapl.69965	0.0943396	0.461263	0.0398961	M
CSbapl.69964	0.0320088	0.130486	0.0129004	M
CSbapl.94041	0.177885	0	0	M
CSbapl.94047	0.0238095	0.0718609	0.00729933	M
CSbapl.69963	0.533819	1.871	0.110932	M
CSbapl.69962	0.0492424	343.222	0.614405	M
CSbapl.50654	0.119048	0	0	M
CSbapl.69969	0.175563	0.0378971	0.00391246	M
CSbapl.69968	0.166667	0.46967	0.0404996	M
CSbapl.65055	0.0802469	0.0458467	0.00471503	M
CSbapl.62006	0.612266	0.864162	0.0655094	M
CSbapl.65057	0.0803419	0	0	M
CSbapl.62003	0.798103	6.19886	0.207624	M
CSbapl.62002	0.634299	9.17045	0.243971	M
CSbapl.65053	0.2	0	0	M
CSbapl.95408	0.123457	0	0	M
CSbapl.19986	0.111111	0	0	M
CSbapl.19987	0.338235	0	0	M
CSbapl.60711	0.11623	0.182466	0.0176289	M
CSbapl.19982	0.176471	0	0	M
CSbapl.51001	0.0792683	0	0	M
CSbapl.15202	0.847544	29.4734	0.359396	M
CSbapl.15201	0.919638	2.92447	0.14381	M
CSbapl.51002	0.0813953	0.046676	0.0047984	M
CSbapl.15206	0.81263	5.29439	0.193501	M
CSbapl.20534	0.0444444	0	0	M
CSbapl.20536	0.0909091	0	0	M
CSbapl.26279	0.103448	139.9	0.520452	M
CSbapl.26272	0.117647	0.17614	0.0170647	M
CSbapl.66652	0.0976471	0.0723958	0.0073518	M
CSbapl.22978	0.0952381	0	0	M
CSbapl.38107	0.3125	0.0248181	0.00257858	M
CSbapl.45749	0.1	0	0	M
CSbapl.45748	0.2	0	0	M
CSbapl.93906	0.0869565	1.45242	0.0943575	M
CSbapl.93907	0.114286	14.5858	0.288871	M
CSbapl.9980	0.400481	5.32419	0.193998	M
CSbapl.64878	0.125	0	0	M
CSbapl.64879	0.634146	0.128866	0.0127497	M
CSbapl.9981	0.116118	26.7727	0.349635	M
CSbapl.14556	0.0909091	0.76136	0.0595428	M
CSbapl.64877	0.0816327	0	0	M
CSbapl.64872	0.166667	0.088066	0.00887765	M
CSbapl.50752	0.754494	4.88413	0.186412	M
CSbapl.50753	0.853184	1.60642	0.100763	M
CSbapl.50750	0.112	0	0	M
CSbapl.92058	0.67515	1.21949	0.0838603	M
CSbapl.50756	0.776276	13.6855	0.282613	M
CSbapl.50757	0.706406	13.5492	0.281632	M
CSbapl.50754	0.5	0	0	M
CSbapl.50755	0.830882	0	0	M
CSbapl.58565	0.205128	0.214556	0.0204454	M
CSbapl.97020	0.0833333	0.917775	0.0684917	M
CSbapl.50758	0.730506	5.09806	0.190168	M
CSbapl.50759	0.798352	34.1369	0.374374	M
CSbapl.97025	0.0985222	6.0651	0.205651	M
CSbapl.97024	0.122807	0.639873	0.0520256	M
CSbapl.97027	0.0714286	0.0749274	0.00759982	M
CSbapl.97026	0.822773	8.23782	0.233854	M
CSbapl.10905	0.780024	8.65986	0.238553	M
CSbapl.63068	0.811904	50.7526	0.415103	M
CSbapl.63066	0.0769231	0	0	M
CSbapl.5215	0.861366	47.5623	0.408411	M
CSbapl.5216	0.698862	26.1952	0.347424	M
CSbapl.10904	0.126316	0.117351	0.0116712	M
CSbapl.5212	0.239793	2.1686	0.121307	M
CSbapl.47124	0.2	0.0535303	0.00548496	M
CSbapl.6749	0.0434783	0	0	M
CSbapl.6748	0.025641	0.308428	0.0282761	M
CSbapl.47127	0.0851064	0	0	M
CSbapl.9742	0.159821	0	0	M
CSbapl.9743	0.181818	0.0375264	0.00387489	M
CSbapl.9740	0.0852641	0	0	M
CSbapl.14625	0.347826	0.0868556	0.00876058	M
CSbapl.9746	0.107143	0	0	M
CSbapl.9747	0.113475	0.802282	0.0619586	M
CSbapl.13553	0.6	0	0	M
CSbapl.58699	0.439774	1.28002	0.0866902	M
CSbapl.9486	0.12	0	0	M
CSbapl.67520	0.139535	0.0245043	0.00254637	M
CSbapl.27282	0.111111	0.0551445	0.005646	M
CSbapl.58690	0.0833333	0.914624	0.0683188	M
CSbapl.58695	0.40678	0.127721	0.0126429	M
CSbapl.58694	0.321168	1.02583	0.0742571	M
CSbapl.99356	0.0614525	0.446689	0.0388418	M
CSbapl.99352	0.166667	0.0755722	0.00766289	M
CSbapl.18323	0.0727273	0.0380494	0.0039279	M
CSbapl.1246	0.696118	29.9179	0.360919	M
CSbapl.18321	0.0837696	0.877811	0.0662767	M
CSbapl.1244	0.500772	22.6175	0.332588	M
CSbapl.18325	0.129032	1.25146	0.0853644	M
CSbapl.18324	0.749608	8.237	0.233845	M
CSbapl.6299	0.239506	1.87198	0.110968	M
CSbapl.1248	0.747189	22.7581	0.333212	M
CSbapl.42214	0.101852	2.52519	0.132524	M
CSbapl.42216	0.112	0.497379	0.0424642	M
CSbapl.92720	0.836545	5.29112	0.193447	M
CSbapl.82900	0.0384615	1.99839	0.115499	M
CSbapl.12893	0.0689655	0.0125144	0.00130814	M
CSbapl.96370	0.150442	0.221813	0.021072	M
CSbapl.96376	0.133333	3.27265	0.152751	M
CSbapl.62820	0.277778	2.48555	0.131335	M
CSbapl.62822	0.519481	6.46466	0.211437	M
CSbapl.56343	0.6781	95.3752	0.480503	M
CSbapl.56341	0.0663265	0.389993	0.0346367	M
CSbapl.71030	0.0833333	1.09474	0.0777757	M
CSbapl.54858	0.0734055	1.11384	0.0787304	M
CSbapl.9584	0.761117	3.39221	0.155654	M
CSbapl.7164	0.0896337	9.78199	0.250113	M
CSbapl.7165	0.832871	60.9346	0.433994	M
CSbapl.7167	0.790389	3.40899	0.156055	M
CSbapl.7161	0.774291	6.18438	0.207412	M
CSbapl.7162	0.87545	2.9819	0.145338	M
CSbapl.7163	0.2	0.62431	0.0510226	M
CSbapl.7168	0.802914	36.2766	0.380591	M
CSbapl.7169	0.189045	0.339526	0.0307467	M
CSbapl.28360	0.207207	0.0301662	0.00312607	M
CSbapl.28361	0.0633609	0	0	M
CSbapl.28362	0.724249	0.140978	0.0138721	M
CSbapl.28363	0.821267	0.760624	0.0594988	M
CSbapl.28364	0.122449	0.0684024	0.00695939	M
CSbapl.28365	0.604355	0.150429	0.0147398	M
CSbapl.10668	0.0965753	0.798311	0.0617266	M
CSbapl.10669	0.0832699	0.125002	0.012389	M
CSbapl.99827	0.153846	0	0	M
CSbapl.2536	0.0840336	0.890659	0.0669939	M
CSbapl.2530	0.151394	0.272999	0.0253887	M
CSbapl.99822	0.857895	1.72545	0.10546	M
CSbapl.39261	0.030888	0	0	M
CSbapl.89818	0.0714286	0	0	M
CSbapl.16791	0.0808824	0	0	M
CSbapl.1303	0.037594	0.222861	0.0211621	M
CSbapl.89813	0.047619	0	0	M
CSbapl.89810	0.441026	0	0	M
CSbapl.89816	0.0769231	0	0	M
CSbapl.89814	0.125	3.20963	0.151188	M
CSbapl.17076	0.756705	1.58715	0.0999827	M
CSbapl.84992	0.075188	1.01695	0.0737952	M
CSbapl.46460	0.612099	0.455205	0.0394592	M
CSbapl.46466	0.674227	0.565116	0.0471179	M
CSbapl.46465	0.528571	0.14596	0.0143305	M
CSbapl.46464	0.674961	0	0	M
CSbapl.47335	0.107692	0	0	M
CSbapl.47337	0.0833333	0.0442702	0.00455635	M
CSbapl.40103	0.837802	2.26761	0.124543	M
CSbapl.40100	0.836737	11.3645	0.264518	M
CSbapl.60441	0.122807	3.53173	0.158943	M
CSbapl.86460	0.703142	0.109202	0.0109013	M
CSbapl.47339	0.1	0.321978	0.0293597	M
CSbapl.40109	0.0480769	0	0	M
CSbapl.61393	0.851852	0	0	M
CSbapl.90025	0.819289	2.20211	0.122413	M
CSbapl.90026	0.696429	0.372661	0.0333169	M
CSbapl.44825	0.0549797	1.5381	0.0979695	M
CSbapl.44827	0.117647	0.589669	0.0487551	M
CSbapl.44826	0.0232068	4.39897	0.177361	M
CSbapl.44828	0.395349	0	0	M
CSbapl.90028	0.685799	18.671	0.313356	M
CSbapl.94774	0.1	0	0	M
CSbapl.3660	0.166667	0	0	M
CSbapl.3667	0.0897353	3.41226	0.156133	M
CSbapl.61039	0.699558	6.64721	0.213979	M
CSbapl.31295	0.0659341	0	0	M
CSbapl.13315	0.0994898	0.122224	0.0121289	M
CSbapl.61034	0.129032	0	0	M
CSbapl.13313	0.12	0	0	M
CSbapl.61032	0.0857143	4.17997	0.173005	M
CSbapl.61030	0.787603	193.202	0.5542	M
CSbapl.11224	0.193916	0	0	M
CSbapl.11221	0.0740741	0	0	M
CSbapl.11220	0.2	0	0	M
CSbapl.11229	0.2	0.0368624	0.00380755	M
CSbapl.11228	0.0923567	0.0639189	0.00651707	M
CSbapl.82297	0.0512821	0.0609172	0.00621989	M
CSbapl.27918	0.0827423	0.12126	0.0120385	M
CSbapl.27913	0.113636	0.0520009	0.00533215	M
CSbapl.27910	0.0705882	2.54722	0.133179	M
CSbapl.27916	0.12963	1.51533	0.0970213	M
CSbapl.25200	0.800661	3.15984	0.149936	M
CSbapl.41274	0.805118	11.1319	0.26252	M
CSbapl.41273	0.16	0.102058	0.0102216	M
CSbapl.25205	0.132616	0.240167	0.0226403	M
CSbapl.76171	0.117647	0	0	M
CSbapl.25208	0.880952	8.5005	0.236804	M
CSbapl.25209	0.125	0	0	M
CSbapl.82120	0.0767544	7.19477	0.221252	M
CSbapl.86639	0.0797101	0	0	M
CSbapl.86636	0.0932432	0	0	M
CSbapl.86637	0.0932432	0	0	M
CSbapl.86633	0.213793	0	0	M
CSbapl.93594	0.196262	0	0	M
CSbapl.93590	0.854128	0.534806	0.0450609	M
CSbapl.93592	0.772842	2.89771	0.14309	M
CSbapl.93599	0.76252	3.24412	0.152046	M
CSbapl.93598	0.0714286	1.8209	0.109081	M
CSbapl.82846	0.106667	0.299716	0.0275733	M
CSbapl.68562	0.109244	0.224025	0.0212622	M
CSbapl.68561	0.10989	18.8699	0.314414	M
CSbapl.68567	0.0972222	0.0215341	0.00224098	M
CSbapl.44174	0.0666667	0	0	M
CSbapl.68568	0.0711921	0.110345	0.0110097	M
CSbapl.44178	0.525496	15.274	0.293416	M
CSbapl.45888	0.115696	20.8415	0.324365	M
CSbapl.45889	0.0146341	0.503592	0.0428997	M
CSbapl.40461	0.76912	2.50957	0.132057	M
CSbapl.45880	0.0571429	10.494	0.256839	M
CSbapl.45883	0.870432	2.82961	0.141236	M
CSbapl.45884	0.672087	10.2595	0.254671	M
CSbapl.45886	0.714176	4.06702	0.170686	M
CSbapl.45887	0.74316	14.8448	0.290604	M
CSbapl.93043	0.649772	3.38318	0.155437	M
CSbapl.93042	0.0817308	0.168418	0.0163719	M
CSbapl.93040	0.150407	0.252738	0.0237011	M
CSbapl.93047	0.1	0.154111	0.015076	M
CSbapl.93046	0.790978	0.826677	0.0633727	M
CSbapl.55937	0.0820896	0	0	M
CSbapl.55936	0.0955665	0.853051	0.0648805	M
CSbapl.55933	0.0687023	0	0	M
CSbapl.5153	0.83532	0.0977647	0.00981107	M
CSbapl.19279	0.0952381	0	0	M
CSbapl.64091	0.136364	0	0	M
CSbapl.36168	0.714099	9.20826	0.244361	M
CSbapl.70435	0.107143	0	0	M
CSbapl.70439	0.111684	0.111207	0.0110913	M
CSbapl.54088	0.0747618	0.329858	0.0299848	M
CSbapl.83653	0.0808989	3.60831	0.160705	M
CSbapl.83652	0.130435	0.122373	0.0121429	M
CSbapl.47565	0.136364	0.157125	0.0153503	M
CSbapl.73051	0.0406654	0.0163414	0.00170495	M
CSbapl.45228	0.801378	13.8978	0.284122	M
CSbapl.45225	0.841939	4.99922	0.188449	M
CSbapl.45220	0.73093	13.6852	0.28261	M
CSbapl.45222	0.419753	0.0737301	0.0074826	M
CSbapl.45223	0.752445	181.381	0.547594	M
CSbapl.53196	0.0839895	0.0917662	0.00923475	M
CSbapl.53191	0.142857	0	0	M
CSbapl.53193	0.116279	0.066795	0.00680103	M
CSbapl.53198	0.0874317	0.119346	0.0118589	M
CSbapl.93237	0.781609	0.821117	0.0630521	M
CSbapl.92315	0.0828402	2.39988	0.128717	M
CSbapl.84568	0.620808	5.61436	0.198717	M
CSbapl.84561	0.629062	2.75047	0.13904	M
CSbapl.84566	0.0761905	0.0726205	0.00737385	M
CSbapl.84567	0.166667	0	0	M
CSbapl.53441	0.854965	2.92015	0.143694	M
CSbapl.53440	0.2	2.36474	0.127624	M
CSbapl.53447	0.166667	0	0	M
CSbapl.53444	0.166667	0	0	M
CSbapl.53448	0.133333	0.916599	0.0684272	M
CSbapl.57577	0.113924	0.0658124	0.0067041	M
CSbapl.57574	0.521739	0	0	M
CSbapl.57578	0.142857	0.0358039	0.00370012	M
CSbapl.84388	0.0645953	0.116586	0.0115991	M
CSbapl.84384	0.0701754	0.111053	0.0110766	M
CSbapl.76999	0.166667	1.70527	0.104679	M
CSbapl.73310	0.112903	2.69993	0.137613	M
CSbapl.68129	0.80258	13.7411	0.28301	M
CSbapl.88807	0.228571	0.0923483	0.00929081	M
CSbapl.73317	0.540886	2.32548	0.12639	M
CSbapl.52718	0.0645161	0.141273	0.0138994	M
CSbapl.65876	0.0706806	0.110305	0.0110058	M
CSbapl.52714	0.191199	0.473413	0.0407671	M
CSbapl.52716	0.839547	34.5557	0.37562	M
CSbapl.52717	0.0859729	1.47053	0.0951311	M
CSbapl.52710	0.2	0.0121533	0.00127062	M
CSbapl.52711	0.23527	4.75418	0.184063	M
CSbapl.65874	0.217835	2.7855	0.140018	M
CSbapl.12603	0.8	0.536023	0.0451443	M
CSbapl.56624	0.271242	0.46491	0.0401583	M
CSbapl.65873	0.214573	0.578445	0.0480099	M
CSbapl.15049	0.658996	0.104002	0.010407	M
CSbapl.15048	0.766422	5.29979	0.193592	M
CSbapl.43317	0.0998926	0.355455	0.0319901	M
CSbapl.43315	0.15	0.0214618	0.00223354	M
CSbapl.43312	0.810713	6.87764	0.217101	M
CSbapl.15040	0.812905	23.1186	0.334796	M
CSbapl.46142	0.703971	51.4391	0.416489	M
CSbapl.15042	1	0.379184	0.0338156	M
CSbapl.10277	0.0869565	0.444727	0.038699	M
CSbapl.85386	0.757812	10.1153	0.253315	M
CSbapl.85383	0.806714	13.6867	0.282622	M
CSbapl.85382	0.101844	0.0653903	0.00666244	M
CSbapl.31495	0.559278	0.512397	0.0435138	M
CSbapl.2278	0.0834725	0.679261	0.0545221	M
CSbapl.74840	0.10822	0.0805963	0.00815307	M
CSbapl.2273	0.705128	33.5876	0.372716	M
CSbapl.2272	0.776942	0	0	M
CSbapl.2270	0.751581	34.398	0.375152	M
CSbapl.2275	0.117647	0.0930272	0.00935617	M
CSbapl.10015	0.157895	0.0689843	0.00701666	M
CSbapl.19217	0.132619	0.265817	0.0247936	M
CSbapl.19212	0.1	0	0	M
CSbapl.99750	0.0676923	0	0	M
CSbapl.19218	0.0930902	2.0609	0.117669	M
CSbapl.19219	0.620519	7.7358	0.227977	M
CSbapl.37898	0.293471	9.24641	0.244754	M
CSbapl.37899	0.206366	6.834	0.216517	M
CSbapl.37892	0.0588235	0	0	M
CSbapl.37893	0.798999	12.8139	0.276177	M
CSbapl.37890	0.591743	5.33319	0.194148	M
CSbapl.37891	0.840113	84.5786	0.468006	M
CSbapl.37895	0.802987	2.23095	0.123356	M
CSbapl.15162	0.766473	2.86077	0.142088	M
CSbapl.10991	0.2	0	0	M
CSbapl.43210	0.107884	1.88926	0.111599	M
CSbapl.93469	0.0959596	0.696005	0.0555657	M
CSbapl.15167	0.076087	0.0840093	0.00848476	M
CSbapl.73863	0.171362	0.208908	0.0199551	M
CSbapl.73862	0.0972222	0	0	M
CSbapl.73861	0.0938628	0	0	M
CSbapl.21975	0.385847	0.126464	0.0125256	M
CSbapl.48099	0.0454545	0.0456408	0.00469432	M
CSbapl.73868	0.108906	0.0825883	0.00834679	M
CSbapl.48090	0.105556	186.337	0.550414	M
CSbapl.21978	0.612932	5.46998	0.196395	M
CSbapl.37766	0.0824742	0.0608691	0.00621512	M
CSbapl.37768	0.108808	0	0	M
CSbapl.14794	0.75186	7.74248	0.228058	M
CSbapl.72193	0.142857	0.179052	0.0173248	M
CSbapl.40663	0.216393	0.307443	0.0281969	M
CSbapl.72196	0.813685	12.0691	0.270347	M
CSbapl.72197	0.123457	0	0	M
CSbapl.97229	0.11236	0.034687	0.00358664	M
CSbapl.97222	0.241379	4.86563	0.186081	M
CSbapl.97227	0.132075	0.113911	0.0113469	M
CSbapl.97224	0.0620915	0.0603815	0.00616677	M
CSbapl.471	0.863464	0.135991	0.0134115	M
CSbapl.472	0.748421	1.06655	0.0763505	M
CSbapl.52827	0.219512	3.75064	0.163905	M
CSbapl.478	0.0700326	2.3347	0.126681	M
CSbapl.48323	0.758901	2.11884	0.119642	M
CSbapl.59902	0.0666667	1.82358	0.109181	M
CSbapl.59903	0.657303	0	0	M
CSbapl.48326	0.0819799	0.0868442	0.00875948	M
CSbapl.59905	0.816302	2.35311	0.12726	M
CSbapl.59906	0.173269	0.929556	0.0691359	M
CSbapl.52823	0.867203	272.377	0.590168	M
CSbapl.75082	0.787201	6.76911	0.215642	M
CSbapl.97593	0.827455	19.9459	0.319961	M
CSbapl.97592	0.652544	3.7423	0.16372	M
CSbapl.75087	0.125	0.0192257	0.00200302	M
CSbapl.52820	0.808983	73.3306	0.453184	M
CSbapl.97597	0.185374	0.0695376	0.00707109	M
CSbapl.97596	0.600426	0.13046	0.012898	M
CSbapl.3745	0.724087	11.2674	0.263688	M
CSbapl.72739	0.107143	0	0	M
CSbapl.72734	0.819153	2.41835	0.129287	M
CSbapl.72735	0.68495	17.5537	0.307205	M
CSbapl.9230	0.0335196	3.23456	0.151809	M
CSbapl.9231	0.107736	420.321	0.635664	M
CSbapl.72731	0.767827	5.56326	0.197901	M
CSbapl.9235	0.789282	1.4131	0.092657	M
CSbapl.22407	0.0833333	1.09151	0.0776134	M
CSbapl.65745	0.181818	0.686247	0.0549588	M
CSbapl.22402	0.112847	0.107086	0.0107004	M
CSbapl.77866	0.555814	0.154472	0.0151088	M
CSbapl.75331	0.0843373	0	0	M
CSbapl.22408	0.0925926	0	0	M
CSbapl.71429	0.787234	0.378566	0.0337685	M
CSbapl.71428	0.944828	0.353753	0.031858	M
CSbapl.65741	0.579158	9.85273	0.250801	M
CSbapl.71422	0.162715	0.0596136	0.00609056	M
CSbapl.71425	0.0769231	0	0	M
CSbapl.71426	0.338669	0	0	M
CSbapl.77860	0.153846	0	0	M
CSbapl.96178	0.798935	104.218	0.489736	M
CSbapl.98315	0.0780762	0	0	M
CSbapl.98310	0.139181	1.94416	0.113579	M
CSbapl.98318	0.0662651	0.0256338	0.00266226	M
CSbapl.98319	0.0821402	0.0208269	0.00216814	M
CSbapl.12179	0.628931	20.7107	0.323733	M
CSbapl.8618	0.800975	8.18419	0.233242	M
CSbapl.36385	0.0610711	0.130799	0.0129296	M
CSbapl.32600	0.151515	1.57903	0.0996519	M
CSbapl.91337	0.0512821	0.331842	0.0301417	M
[truncated: 29,859 more rows]

## Sheet: F_TSSK2k_5mC_vs_gene_express
Gene	F_5mC_level	expr_count	exop_ration	sample
CSbapl.11333	0.939394	0.0961708	0.00868627	F	expr_count：fpkm
CSbapl.11337	0.365297	0.579592	0.043247	F	expr_ratio：log10(fpkm+1)/max（log10(fpkm+1)）
CSbapl.11334	0.547945	1.52563	0.0876442	F
CSbapl.95455	0.863563	0.429434	0.0337978	F
CSbapl.95453	0.0918367	8.35175	0.21148	F
CSbapl.95450	0.0823529	0	0	F
CSbapl.64814	0.0677966	0.426911	0.0336307	F
CSbapl.64448	0.804878	0.311202	0.0256307	F
CSbapl.24060	0.130268	5.77579	0.180999	F
CSbapl.24066	0.214286	0	0	F
CSbapl.24065	0.225	0.225771	0.0192573	F
CSbapl.64442	0.142857	0.131093	0.011653	F
CSbapl.67181	0.0821256	0.216726	0.0185567	F
CSbapl.67180	0.116279	0.228661	0.01948	F
CSbapl.20766	0.166667	0	0	F
CSbapl.67182	0.366876	0.484918	0.0374002	F
CSbapl.67185	0.058296	0.20026	0.0172678	F
CSbapl.67184	0.391753	1.51099	0.087094	F
CSbapl.20762	0.101695	1.41715	0.0834911	F
CSbapl.63870	0.135135	0.0302986	0.00282362	F
CSbapl.63874	0.0994475	0.113464	0.010167	F
CSbapl.63878	0.0833333	0.980321	0.0646349	F
CSbapl.62694	0.181818	0	0	F
CSbapl.62695	0.2	0.220681	0.0188637	F
CSbapl.90563	0.106061	0.0720545	0.00658183	F
CSbapl.62690	0.0331492	0	0	F
CSbapl.44200	0.105263	64.9783	0.396301	F
CSbapl.44203	0.2	0	0	F
CSbapl.90562	0.10962	0.484092	0.0373476	F
CSbapl.68882	0.166667	0	0	F
CSbapl.17406	0.72678	26.0347	0.311901	F
CSbapl.17502	0.683109	1.27716	0.0778476	F
CSbapl.38630	0.93578	0.227486	0.0193896	F
CSbapl.38637	0.182927	0.446377	0.0349125	F
CSbapl.69808	0.0676329	0	0	F
CSbapl.93114	0.142857	0.147917	0.0130497	F
CSbapl.93117	0.0931677	0.17097	0.0149307	F
CSbapl.93116	0.0819672	8.9212	0.217071	F
CSbapl.69800	0.142857	0	0	F
CSbapl.69801	0.139535	26.7015	0.314206	F
CSbapl.69807	0.166667	3.85928	0.149549	F
CSbapl.69805	0.108696	0	0	F
CSbapl.65319	0.69483	0.817429	0.056515	F
CSbapl.65313	0.105263	3.41589	0.140498	F
CSbapl.65315	0.0847458	0	0	F
CSbapl.63251	0.0754717	0	0	F
CSbapl.63259	0.665939	1.10754	0.0705249	F
CSbapl.15360	0.680328	1.53482	0.0879875	F
CSbapl.15361	0.125	4.99216	0.169373	F
CSbapl.16949	0.0934579	0	0	F
CSbapl.51123	0.0875	0.724033	0.0515243	F
CSbapl.15366	0.2	0.89855	0.0606458	F
CSbapl.16945	0.320513	0	0	F
CSbapl.16947	0.0864198	0	0	F
CSbapl.53903	0.0909091	0.0767423	0.00699458	F
CSbapl.27449	0.0652174	0	0	F
CSbapl.8139	0.615741	0.963853	0.063845	F
CSbapl.26335	0.162162	0.191318	0.0165603	F
CSbapl.26337	0.2	15.0922	0.262824	F
CSbapl.26330	0.166667	0	0	F
CSbapl.8131	0.166667	0.107405	0.00965079	F
CSbapl.45153	0.79	7.59915	0.203543	F
CSbapl.45150	0.2	0.709754	0.0507376	F
CSbapl.45151	0.12766	3.8999	0.150336	F
CSbapl.66753	0.1875	0	0	F
CSbapl.45158	0.568182	0.373899	0.0300493	F
CSbapl.57591	0.627072	5.12902	0.171509	F
CSbapl.92242	0.105263	0.362665	0.0292726	F
CSbapl.92241	0.0882353	0	0	F
CSbapl.99011	0.0869565	2.32275	0.113592	F
CSbapl.99015	0.0654628	0.202216	0.0174218	F
CSbapl.99018	0.0751174	1.37828	0.0819573	F
CSbapl.99019	0.079646	1.32633	0.0798684	F
CSbapl.13403	0.111111	8.65277	0.214477	F
CSbapl.57600	0.1875	0.119526	0.0106806	F
CSbapl.13401	0.635903	13.31	0.251721	F
CSbapl.50654	0.0706522	0	0	F
CSbapl.13407	0.172414	0	0	F
CSbapl.57604	0.114286	0.384004	0.0307425	F
CSbapl.13409	0.108911	0.0462848	0.00428014	F
CSbapl.13408	0.2	0	0	F
CSbapl.97143	0.75	1.43328	0.0841204	F
CSbapl.50659	0.166667	0	0	F
CSbapl.50658	0.133333	0	0	F
CSbapl.58407	0.0740741	0	0	F
CSbapl.5559	0.757862	3.55413	0.143414	F
CSbapl.58405	0.123711	0.161265	0.0141433	F
CSbapl.5556	0.532787	7.74091	0.20509	F
CSbapl.58408	0.107143	0	0	F
CSbapl.5550	0.129412	0	0	F
CSbapl.9669	0.0555556	0	0	F
CSbapl.22055	0.832573	9.24107	0.220073	F
CSbapl.22056	0.879863	47.1077	0.36642	F
CSbapl.50386	0.113636	0.0854852	0.00775959	F
CSbapl.22050	0.88	4.1568	0.155171	F
CSbapl.22052	0.142857	0.0600541	0.00551695	F
CSbapl.67404	0.0892857	0.0708391	0.00647452	F
CSbapl.67405	0.0839695	1.57871	0.0896115	F
CSbapl.7953	0.492908	1.83039	0.0984209	F
CSbapl.7952	0.132979	9.50701	0.222498	F
CSbapl.7955	0.116162	54.8732	0.380575	F
CSbapl.67187	0.166667	4.3118	0.157972	F
CSbapl.7956	0.133333	0	0	F
CSbapl.7958	0.748691	5.50514	0.177143	F
CSbapl.67408	0.0659341	0.44686	0.0349441	F
CSbapl.23901	0.34375	67.9845	0.400516	F
CSbapl.41281	0.11	0	0	F
CSbapl.23907	0.1	2.19724	0.10995	F
CSbapl.18203	0.2	0.15585	0.0137012	F
CSbapl.6394	0.824573	14.6196	0.260005	F
CSbapl.6396	0.473183	0	0	F
CSbapl.6397	0.111111	0.0250742	0.00234272	F
CSbapl.18208	0.125	0	0	F
CSbapl.6399	0.111111	0	0	F
CSbapl.92938	0.655963	2.83039	0.127042	F
CSbapl.92939	0.762125	0.388483	0.0310482	F
CSbapl.42311	0.108108	47.6898	0.367557	F
CSbapl.42310	0.0526316	0.342196	0.0278408	F
CSbapl.42313	0.102041	3.04594	0.132221	F
CSbapl.92937	0.688235	6.9721	0.19638	F
CSbapl.92930	0.0833333	0.0453582	0.00419632	F
CSbapl.42317	0.745318	0.284016	0.0236488	F
CSbapl.92933	0.120438	0.136892	0.0121367	F
CSbapl.84955	0.125	0	0	F
CSbapl.12758	0.0927835	10.4785	0.230864	F
CSbapl.12754	0.0461538	0	0	F
CSbapl.12752	0.097561	0	0	F
CSbapl.12753	0.0761905	0	0	F
CSbapl.56552	0.685829	1.62458	0.0912796	F
CSbapl.56553	0.151163	0	0	F
CSbapl.56550	0.0833333	0	0	F
CSbapl.56556	0.119469	0.0377367	0.00350411	F
CSbapl.56554	0.609023	0.525354	0.0399417	F
CSbapl.96230	0.0670732	0	0	F
CSbapl.98050	0.0820896	0	0	F
CSbapl.98055	0.16	0.632289	0.0463514	F
CSbapl.91299	0.138211	1.4791	0.0858849	F
CSbapl.43494	0.0806452	0.639517	0.0467694	F
CSbapl.98525	0.0808081	0	0	F
CSbapl.86666	0.224924	0.538801	0.040772	F
CSbapl.10453	0.12	0	0	F
CSbapl.10452	0.0522388	0	0	F
CSbapl.91297	0.1	0.568823	0.0425999	F
CSbapl.7044	0.153846	28.0432	0.31868	F
CSbapl.91293	0.103774	0	0	F
CSbapl.39348	0.607212	0.618096	0.0455253	F
CSbapl.99909	0.138241	1.09626	0.070017	F
CSbapl.2678	0.123967	0	0	F
CSbapl.99904	0.125	0.0899087	0.0081443	F
CSbapl.99905	0.150442	0.151324	0.0133301	F
CSbapl.2675	0.0859375	2.00217	0.103995	F
CSbapl.99900	0.803685	0.123899	0.0110494	F
CSbapl.37417	0.0967742	0.129885	0.0115519	F
CSbapl.37415	0.0555556	0	0	F
CSbapl.37411	0.0961538	0	0	F
CSbapl.80485	0.106918	8.08802	0.208774	F
CSbapl.37418	0.298119	20.9739	0.292294	F
CSbapl.4631	0.809524	1.72927	0.0949795	F
CSbapl.4635	0.2	12.56	0.246629	F
CSbapl.47557	0.0851064	1.50293	0.08679	F
CSbapl.80736	0.556237	0	0	F
CSbapl.40262	0.114286	2.75159	0.125075	F
CSbapl.40261	0.755372	292.292	0.537427	F
CSbapl.40260	0.111111	0.408833	0.0324245	F
CSbapl.81283	0.107143	2.8099	0.126534	F
CSbapl.44944	0.05	8.49336	0.212901	F
CSbapl.44945	0.104478	0	0	F
CSbapl.81287	0.645707	19.4921	0.28569	F
CSbapl.44941	0.176471	0	0	F
CSbapl.90300	0.116279	0	0	F
CSbapl.90302	0.150943	0.219347	0.0187602	F
CSbapl.44948	0.818887	2.40425	0.115885	F
CSbapl.90306	0.0831409	0.885054	0.059971	F
CSbapl.4099	0.047619	0	0	F
CSbapl.4098	0.121429	0	0	F
CSbapl.4097	0.0925926	0	0	F
CSbapl.4096	0.0814815	0.143349	0.0126725	F
CSbapl.4093	0.111888	0.11848	0.0105922	F
CSbapl.76741	0.759509	0.110109	0.00988149	F
CSbapl.55145	0.542857	0.542102	0.0409748	F
CSbapl.82394	0.0982143	0.252358	0.0212872	F
CSbapl.5943	0.123348	1.93687	0.101915	F
CSbapl.5945	0.2	0.540919	0.0409021	F
CSbapl.72863	0.1	0	0	F
CSbapl.86881	0.0791367	0	0	F
CSbapl.27819	0.111111	0	0	F
CSbapl.27817	0.798729	0.26944	0.0225688	F
CSbapl.27816	0.723877	8.08633	0.208756	F
CSbapl.27815	0.50266	0.0481468	0.00444834	F
CSbapl.86889	0.0689655	0	0	F
CSbapl.27810	0.835821	0.325607	0.0266643	F
CSbapl.41135	0.189189	4.30681	0.157883	F
CSbapl.41136	0.753066	6.60247	0.191889	F
CSbapl.41139	0.436647	0.503006	0.0385456	F
CSbapl.86776	0.368601	0.0136248	0.00128017	F
CSbapl.86774	0.849343	0.21166	0.018162	F
CSbapl.19243	0.125	1.37424	0.0817968	F
CSbapl.79188	0.108108	34.9347	0.338822	F
CSbapl.79184	0.763231	2.60916	0.121414	F
CSbapl.79181	0.706284	0.163866	0.014355	F
CSbapl.35060	0.113208	1.13661	0.0718208	F
CSbapl.35062	0.0802676	0	0	F
CSbapl.93113	0.0909091	0.29697	0.0245984	F
CSbapl.33888	0.843243	53.954	0.379006	F
CSbapl.33883	0.104167	0	0	F
CSbapl.33882	0.125	0	0	F
CSbapl.33885	0.110236	0.320468	0.0262969	F
CSbapl.1779	0.116564	0	0	F
CSbapl.33886	0.457332	1.5992	0.0903601	F
CSbapl.70377	0.107143	1.43204	0.0840722	F
CSbapl.94321	0.0673077	0.175401	0.0152879	F
CSbapl.70371	0.113636	3.69108	0.146217	F
CSbapl.94320	0.0805369	0.0471894	0.00436189	F
CSbapl.70378	0.230892	0.0461854	0.00427115	F
CSbapl.78580	0.265873	0.270925	0.0226794	F
CSbapl.78585	0.813472	41.8603	0.355494	F
CSbapl.78584	0.08	0.125293	0.0111667	F
CSbapl.78589	0.127273	2.84291	0.127351	F
CSbapl.53258	0.0475059	0.217879	0.0186463	F
CSbapl.88035	0.0700637	2.21008	0.110329	F
CSbapl.88032	0.0645161	2.24373	0.111316	F
CSbapl.88030	0.0718954	0.554029	0.0417036	F
CSbapl.88031	0.0511628	0.359377	0.0290441	F
CSbapl.53253	0.0740741	0	0	F
CSbapl.53250	0.0779221	4.52346	0.161668	F
CSbapl.53251	0.407502	0.15514	0.013643	F
CSbapl.53256	0.0769231	0	0	F
CSbapl.52770	0.166667	0	0	F
CSbapl.52771	0.966216	0.548168	0.0413461	F
CSbapl.87910	0.0821918	1.30556	0.07902	F
CSbapl.87916	0.1	0.987069	0.0649567	F
CSbapl.87917	0.166667	0	0	F
CSbapl.87918	0.1	0.563285	0.0422653	F
CSbapl.88699	0.104651	9.07857	0.21856	F
CSbapl.32820	0.0952381	0.260442	0.0218959	F
CSbapl.32821	0.9	0.0662257	0.0060661	F
CSbapl.32822	0.95	0	0	F
CSbapl.32824	0.322981	0.71704	0.0511398	F
CSbapl.32825	0.185185	0	0	F
CSbapl.32829	0.108696	0.461848	0.0359189	F
CSbapl.89344	0.0909091	4.89082	0.167759	F
CSbapl.89342	0.0986842	0.0956136	0.00863817	F
CSbapl.89340	0.119403	0	0	F
CSbapl.45112	0.131148	348.159	0.553921	F
CSbapl.88963	0.109589	0	0	F
CSbapl.73053	0.12	0	0	F
CSbapl.88966	0.0582524	0.0268775	0.00250898	F
CSbapl.88967	0.2	0	0	F
CSbapl.88968	0.142857	0.820992	0.0567003	F
CSbapl.85518	0.82	3.38873	0.139914	F
CSbapl.85513	0.114286	0.110912	0.00994996	F
CSbapl.41904	0.196429	2.71532	0.124156	F
CSbapl.41901	0.116883	3.00528	0.131265	F
CSbapl.41900	0.0818182	2.09549	0.10689	F
CSbapl.41903	0.615142	1.08104	0.0693277	F
CSbapl.14527	0.107692	0	0	F
CSbapl.70402	0.130435	0.107766	0.00968165	F
CSbapl.16948	0.153846	0.0828064	0.00752585	F
CSbapl.10359	0.0842105	0.520065	0.0396132	F
CSbapl.15162	0.676845	1.67646	0.0931312	F
CSbapl.43210	0.125	0	0	F
CSbapl.15167	0.109756	0	0	F
CSbapl.43215	0.0763359	0.0333956	0.00310755	F
CSbapl.43214	0.118644	0.102669	0.00924538	F
CSbapl.43219	0.132353	0.0639508	0.00586404	F
CSbapl.79977	0.733796	1.34139	0.0804787	F
CSbapl.79976	0.2	0.351014	0.0284603	F
CSbapl.79975	0.79708	0.116625	0.0104352	F
CSbapl.79974	0.461538	2.70594	0.123917	F
CSbapl.19310	0.166667	0.083639	0.00759856	F
CSbapl.19315	0.117647	1.9768	0.103192	F
CSbapl.19317	0.12	0.568093	0.0425559	F
CSbapl.37997	0.828035	5.28209	0.173843	F
CSbapl.37996	0.126316	0	0	F
CSbapl.37995	0.0869565	0	0	F
CSbapl.37994	0.1	3.48988	0.14207	F
CSbapl.37991	0.106061	0	0	F
CSbapl.95583	0.15625	0	0	F
CSbapl.73944	0.0825688	0	0	F
CSbapl.73946	0.166667	0	0	F
CSbapl.243	0.641777	0.384979	0.0308091	F
CSbapl.242	0.114286	7.64183	0.204011	F
CSbapl.240	0.656033	23.7391	0.303506	F
CSbapl.247	0.160321	0	0	F
CSbapl.246	0.137931	0	0	F
CSbapl.40749	0.12	0.125396	0.0111753	F
CSbapl.40745	0.333333	0.125038	0.0111452	F
CSbapl.40742	0.117647	0	0	F
CSbapl.97308	0.0787402	0.303071	0.0250423	F
CSbapl.97309	0.117647	0	0	F
CSbapl.14690	0.142857	0	0	F
CSbapl.14696	0.0843373	0	0	F
CSbapl.97300	0.166667	0	0	F
CSbapl.97301	0.0869565	0	0	F
CSbapl.14699	0.0641711	0	0	F
CSbapl.97305	0.0769231	0.266579	0.0223553	F
CSbapl.97307	0.0818182	0	0	F
CSbapl.52267	0.123188	0	0	F
CSbapl.50056	0.0952381	0	0	F
CSbapl.95234	0.142857	0.126625	0.0112786	F
CSbapl.95232	0.391304	0	0	F
CSbapl.95233	0.142857	0	0	F
CSbapl.95239	0.793689	4.14821	0.155013	F
CSbapl.64229	0.115607	0	0	F
CSbapl.64228	0.440559	0.208606	0.0179233	F
CSbapl.9061	0.129032	1.60718	0.0906502	F
CSbapl.9064	0.0813008	0	0	F
CSbapl.14340	0.0952381	0	0	F
CSbapl.14343	0.0989011	3.8027	0.148441	F
CSbapl.64222	0.111111	1.75279	0.0957914	F
CSbapl.64224	0.136364	0	0	F
CSbapl.14347	0.108491	0	0	F
CSbapl.14346	0.115288	0	0	F
CSbapl.23310	0.0789474	0	0	F
CSbapl.79537	0.0891089	0	0	F
CSbapl.18447	0.2	0.433322	0.0340547	F
CSbapl.18449	0.0681818	0.657591	0.0478065	F
CSbapl.37398	0.0780142	0.824663	0.0568908	F
CSbapl.75472	0.117647	1.73814	0.0952866	F
CSbapl.71549	0.0882353	5.66787	0.179481	F
CSbapl.71545	0.0852713	0.0376943	0.00350024	F
CSbapl.71543	0.075	0	0	F
CSbapl.71540	0.0769231	0	0	F
CSbapl.36118	0.166667	0	0	F
CSbapl.74328	0.782258	0.78845	0.0549945	F
CSbapl.36110	0.132075	0.233595	0.0198592	F
CSbapl.36112	0.0597015	10.9539	0.234703	F
CSbapl.36113	0.4	0	0	F
CSbapl.36114	0.103896	0	0	F
CSbapl.36116	0.166667	0	0	F
CSbapl.98218	0.82684	0.737604	0.052266	F
CSbapl.24924	0.0673077	0.17073	0.0149112	F
CSbapl.98212	0.235409	2.37363	0.11503	F
CSbapl.98211	0.121212	0.024119	0.00225453	F
CSbapl.98217	0.115385	0	0	F
CSbapl.98216	0.179941	0	0	F
CSbapl.98215	0.151203	0.086814	0.00787532	F
CSbapl.98214	0.101124	2.07432	0.106241	F
CSbapl.65577	0.10101	0	0	F
CSbapl.33694	0.166667	0.0523965	0.00483111	F
CSbapl.33695	0.0888889	0.337666	0.027521	F
CSbapl.33691	0.0606061	0.410675	0.0325482	F
CSbapl.33693	0.136364	0.0622745	0.00571489	F
CSbapl.38180	0.461735	5.22675	0.173006	F
CSbapl.38183	0.0689655	0.670066	0.0485158	F
CSbapl.91073	0.105263	0	0	F
CSbapl.91075	0.0740741	0	0	F
CSbapl.91077	0.0909091	0.0806324	0.00733573	F
CSbapl.91079	0.12	0.139726	0.0123722	F
CSbapl.32129	0.0619048	3.27371	0.137402	F
CSbapl.32128	0.128205	0.0691135	0.00632196	F
CSbapl.611	0.434399	3.4884	0.142039	F
CSbapl.23654	0.610942	31.4956	0.329305	F
CSbapl.23657	0.133333	0	0	F
CSbapl.23651	0.166667	0.579488	0.0432408	F
CSbapl.8891	0.0390071	0	0	F
CSbapl.74704	0.0736842	1.09979	0.0701762	F
CSbapl.23659	0.136364	0.13622	0.0120808	F
CSbapl.42	0.111111	0.0595876	0.0054753	F
CSbapl.74700	0.108696	0.730628	0.0518855	F
CSbapl.18998	0.106195	0	0	F
CSbapl.70639	0.190476	2.44648	0.117051	F
CSbapl.18990	0.116667	0	0	F
CSbapl.18991	0.104478	0	0	F
CSbapl.18993	0.142857	0	0	F
CSbapl.18994	0.0962567	0.0467059	0.0043182	F
CSbapl.18995	0.0544218	0	0	F
CSbapl.70631	0.142857	0.592742	0.0440313	F
CSbapl.70630	0.333333	0.117791	0.0105339	F
CSbapl.69309	0.0967742	0.0242731	0.00226876	F
CSbapl.16453	0.625	0.065195	0.0059746	F
CSbapl.69303	0.0878378	2.57195	0.120434	F
CSbapl.66177	0.111111	0	0	F
CSbapl.66176	0.25	0	0	F
CSbapl.69307	0.0895522	0.243249	0.0205966	F
CSbapl.37839	0.123457	4.48201	0.160956	F
CSbapl.12341	0.144737	0.207515	0.0178379	F
CSbapl.12347	0.122449	5.07487	0.17067	F
CSbapl.97891	0.2	43.3488	0.358723	F
CSbapl.97892	0.166667	1.57558	0.0894968	F
CSbapl.97893	0.0909091	1.34029	0.0804342	F
CSbapl.97894	0.423913	0.116355	0.0104123	F
CSbapl.96161	0.537037	60.4047	0.389506	F
CSbapl.97897	0.117647	1.10234	0.0702912	F
CSbapl.36802	0.0970874	0.11394	0.0102075	F
CSbapl.36806	0.0833333	0	0	F
CSbapl.36807	0.0677966	0	0	F
CSbapl.36805	0.104167	0	0	F
CSbapl.100179	0.2	0.0952664	0.00860818	F
CSbapl.34402	0.675	0.388815	0.0310708	F
CSbapl.34403	0.680672	1.07077	0.0688599	F
CSbapl.50873	0.0869565	0	0	F
CSbapl.28123	0.157895	0	0	F
CSbapl.34406	0.0769231	4.21831	0.156292	F
CSbapl.34408	0.133333	0.335183	0.0273453	F
CSbapl.50879	0.606061	3.97612	0.151797	F
CSbapl.20350	0.166667	0.123148	0.0109861	F
CSbapl.20352	0.1	0.0663536	0.00607745	F
CSbapl.95791	0.47541	3.93719	0.151054	F
CSbapl.95793	0.80248	3.89148	0.150174	F
CSbapl.95795	0.850103	1.47734	0.085818	F
CSbapl.95794	0.0731707	0.829713	0.0571522	F
CSbapl.64764	0.0851064	0.237706	0.0201739	F
CSbapl.64766	0.2	1.54409	0.0883331	F
CSbapl.28657	0.526196	0.109244	0.00980778	F
CSbapl.47961	0.0679245	0.185619	0.0161067	F
CSbapl.47963	0.808673	11.7346	0.240688	F
CSbapl.47965	0.78453	391.531	0.564997	F
CSbapl.47966	0.230088	12.4523	0.245875	F
CSbapl.47969	0.0851064	0.044823	0.00414788	F
CSbapl.62086	0.0576923	0	0	F
CSbapl.62082	0.11194	0.102699	0.009248	F
CSbapl.62080	0.0846561	1.55832	0.0888605	F
CSbapl.67225	0.877814	2.08934	0.106702	F
CSbapl.67226	0.125	0	0	F
CSbapl.67227	0.133333	0.342461	0.0278595	F
CSbapl.11102	0.0898876	0	0	F
CSbapl.67223	0.209622	0	0	F
CSbapl.90459	0.0983607	1.56563	0.0891305	F
CSbapl.67228	0.262295	0.0518524	0.00478219	F
CSbapl.67229	0.2	0	0	F
CSbapl.39755	0.0457143	0	0	F
CSbapl.90671	0.07109	0.0259743	0.00242575	F
CSbapl.63931	0.12069	0.488988	0.0376591	F
CSbapl.36527	0.0748663	0	0	F
CSbapl.9853	0.188552	3.9473	0.151247	F
CSbapl.61687	0.688424	37.8641	0.346235	F
CSbapl.9856	0.119565	0	0	F
CSbapl.3833	0.166667	0.0379875	0.00352696	F
CSbapl.61682	0.217105	2.59756	0.12111	F
CSbapl.3831	0.142857	0	0	F
CSbapl.10859	0.462898	0.111402	0.00999168	F
CSbapl.10858	0.107143	0	0	F
CSbapl.9859	0.151079	0	0	F
CSbapl.61688	0.676851	2.26698	0.111991	F
CSbapl.61689	0.784121	10.6513	0.232277	F
CSbapl.62337	0.0447761	0.18491	0.0160501	F
CSbapl.62336	0.241888	0.259757	0.0218444	F
CSbapl.62332	0.869919	0.476695	0.0368749	F
CSbapl.62338	0.0178571	0.260762	0.0219199	F
CSbapl.25725	0.117647	1.73995	0.0953489	F
CSbapl.25721	0.505495	0.732965	0.0520131	F
CSbapl.25720	0.804688	1.23908	0.0762519	F
CSbapl.81779	0.072	0	0	F
CSbapl.25729	0.56	15.4602	0.264963	F
CSbapl.63683	0.103448	0	0	F
CSbapl.29655	0.037037	0	0	F
CSbapl.96859	0.09375	0	0	F
CSbapl.96857	0.363636	0.14897	0.0131365	F
CSbapl.86571	0.138889	0	0	F
CSbapl.96852	0.644466	0.414681	0.0328164	F
CSbapl.29659	0.142857	0	0	F
CSbapl.29658	0.0892019	8.08955	0.208789	F
CSbapl.21403	0.2	3.01152	0.131413	F
CSbapl.21400	0.879375	2.07712	0.106328	F
CSbapl.21401	0.0655738	6.93585	0.195949	F
CSbapl.21407	0.0300429	0	0	F
CSbapl.21405	0.171527	34.8183	0.338515	F
CSbapl.21409	0.114583	0	0	F
CSbapl.95643	0.122581	16.844	0.2726	F
CSbapl.25899	0.851988	3.4351	0.140908	F
CSbapl.25898	0.117647	0.152867	0.0134567	F
CSbapl.25895	0.123077	0	0	F
CSbapl.25894	0.2	0.042332	0.00392208	F
CSbapl.80807	0.2	0.233346	0.0198401	F
CSbapl.25893	0.0989011	7.96386	0.207472	F
CSbapl.25892	0.0687023	1.06398	0.0685492	F
CSbapl.44430	0.128788	0	0	F
CSbapl.44431	0.0957447	0.910349	0.0612319	F
CSbapl.83965	0.0625	0.485677	0.0374486	F
CSbapl.29387	0.15	0.0577762	0.00531345	F
CSbapl.53690	0.776139	0.248822	0.0210198	F
CSbapl.60795	0.965154	0	0	F
CSbapl.46125	0.614846	8.3933	0.211899	F
CSbapl.60793	0.183716	0.339185	0.0276284	F
CSbapl.60792	0.683458	2.09114	0.106757	F
CSbapl.60798	0.720102	4.79809	0.166258	F
CSbapl.904	0.124031	0.322989	0.0264774	F
CSbapl.59255	0.0833333	0.875903	0.0595106	F
CSbapl.59256	0.0531915	0.419529	0.03314	F
CSbapl.59257	0.0943396	1.0775	0.0691666	F
CSbapl.93327	0.202462	0.167551	0.014654	F
CSbapl.59252	0.535088	3.26047	0.137108	F
CSbapl.59253	0.0697674	4.66152	0.164004	F
CSbapl.93328	0.1	13.9311	0.25574	F
CSbapl.46121	0.0485175	0.0600541	0.00551695	F
CSbapl.59258	0.109091	1.07537	0.0690698	F
CSbapl.59259	0.108911	0.836717	0.0575136	F
CSbapl.5295	0.181818	0	0	F
CSbapl.5296	0.114943	21.0976	0.292825	F
CSbapl.78091	0.0830325	1.05278	0.0680346	F
CSbapl.8073	0.802995	45.3839	0.362968	F
CSbapl.8071	0.503836	9.55929	0.222968	F
CSbapl.8077	0.137931	0	0	F
CSbapl.5299	0.0786517	0	0	F
CSbapl.8074	0.271277	0.296596	0.0245711	F
CSbapl.6929	0.181818	0.0322611	0.00300364	F
CSbapl.6928	0.0945946	1.75082	0.0957234	F
CSbapl.54568	0.0933333	4.24517	0.156778	F
CSbapl.47658	0.0948905	3.36111	0.139317	F
CSbapl.6922	0.142857	21.4386	0.294274	F
CSbapl.6920	0.675033	9.04689	0.218262	F
CSbapl.27768	0.0833333	0	0	F
CSbapl.27765	0.2	0	0	F
CSbapl.27767	0.166667	0.2446	0.0206994	F
CSbapl.27762	0.0909091	0.280267	0.0233722	F
CSbapl.58612	0.0853659	18.3532	0.28028	F
CSbapl.58611	0.0752688	0	0	F
CSbapl.58617	0.103704	3.21625	0.136121	F
CSbapl.58616	0.08	0.0980321	0.00884676	F
CSbapl.5748	0.181818	0	0	F
CSbapl.50656	0.2	0	0	F
CSbapl.5746	0.103448	0	0	F
CSbapl.5744	0.0947368	0	0	F
CSbapl.5745	0.0852713	0	0	F
CSbapl.5741	0.0972222	0	0	F
CSbapl.13400	0.0843373	0.291433	0.0241936	F
CSbapl.13406	0.106195	0	0	F
CSbapl.27499	0.0637255	0	0	F
CSbapl.27492	0.0846154	0.761726	0.0535702	F
CSbapl.27491	0.0927835	0	0	F
CSbapl.27490	0.111111	0.415096	0.0328442	F
CSbapl.27497	0.111111	0	0	F
CSbapl.97144	0.106667	0	0	F
CSbapl.42876	0.109589	0	0	F
CSbapl.82983	0.2	0.485188	0.0374174	F
CSbapl.82987	0.0990099	0.0275125	0.00256747	F
CSbapl.82989	0.54461	7.71187	0.204775	F
CSbapl.45478	0.104072	0.171695	0.0149892	F
CSbapl.24805	0.153846	0	0	F
CSbapl.83058	0.2	1.87971	0.100055	F
CSbapl.45471	0.0804598	21.7763	0.295687	F
CSbapl.45470	0.0961538	90.93	0.42768	F
CSbapl.83057	0.853293	1.28696	0.0782535	F
CSbapl.83056	0.247619	6.37484	0.189014	F
CSbapl.45475	0.165354	0	0	F
CSbapl.83053	0.125	0	0	F
CSbapl.83052	0.198347	0	0	F
CSbapl.50020	0.111111	0	0	F
CSbapl.50022	0.166667	0	0	F
CSbapl.50023	0.2	0.589461	0.0438362	F
CSbapl.57036	0.0865385	0	0	F
CSbapl.57034	0.127273	0	0	F
CSbapl.50029	0.770053	0.727843	0.0517331	F
CSbapl.55760	0.047619	0	0	F
CSbapl.55762	0.862069	0	0	F
CSbapl.5558	0.756614	0.0332443	0.00309369	F
CSbapl.6219	0.078125	0.0289428	0.00269906	F
CSbapl.6218	0.0983607	0	0	F
CSbapl.17193	0.125	0.487052	0.037536	F
CSbapl.6217	0.122807	0	0	F
CSbapl.6216	0.779947	6.05395	0.184805	F
CSbapl.6211	0.117647	0	0	F
CSbapl.42299	0.0760135	0	0	F
CSbapl.42294	0.685647	5.92717	0.18309	F
CSbapl.42295	0.259843	0.0200726	0.00188002	F
CSbapl.42296	0.671875	1.87279	0.0998277	F
CSbapl.42290	0.1	0.232483	0.0197739	F
CSbapl.42292	0.153846	0	0	F
CSbapl.42293	0.68347	2.21802	0.110563	F
CSbapl.11935	0.08	1.98678	0.103509	F
CSbapl.11934	0.0828025	150.961	0.475224	F
CSbapl.11937	0.186047	0.135086	0.0119864	F
CSbapl.11936	0.15625	76.324	0.411312	F
CSbapl.11930	0.792417	1.55422	0.0887088	F
CSbapl.11932	0.166667	4.04384	0.153075	F
CSbapl.11938	0.722826	2.98158	0.130704	F
CSbapl.17440	0.0990099	0	0	F
CSbapl.17446	0.917647	0	0	F
CSbapl.53647	0.728962	1.17932	0.0736932	F
CSbapl.53646	0.891235	1.57674	0.0895392	F
CSbapl.98155	0.0894309	5.02187	0.169841	F
CSbapl.98151	0.0405405	0	0	F
CSbapl.98152	0.111111	0	0	F
CSbapl.98153	0.0645161	0	0	F
CSbapl.42129	0.909091	0.210738	0.0180899	F
CSbapl.42123	0.0392523	0	0	F
CSbapl.42124	0.051756	1.64288	0.0919369	F
CSbapl.42125	0.0526316	0	0	F
CSbapl.101347	0.22449	0.562252	0.0422028	F
CSbapl.101345	0.2	0	0	F
CSbapl.101343	0.0512821	0	0	F
CSbapl.101341	0.0382883	0	0	F
CSbapl.30776	0.933333	0	0	F
CSbapl.43458	0.166667	0	0	F
CSbapl.30770	0.706107	1.57612	0.0895167	F
CSbapl.30771	0.733418	0.0720141	0.00657827	F
CSbapl.84911	0.2	0.181196	0.0157531	F
CSbapl.43454	0.0588235	0.230276	0.0196043	F
CSbapl.43457	0.166667	0	0	F
CSbapl.100435	0.2	0	0	F
CSbapl.43451	0.0612245	0	0	F
CSbapl.43453	0.0387812	0	0	F
CSbapl.84916	0.111111	0	0	F
CSbapl.3193	0.111111	2.72254	0.12434	F
CSbapl.3194	0.4	0.237999	0.0201963	F
CSbapl.51869	0.611667	0.383384	0.0307001	F
CSbapl.51868	0.399061	2.08134	0.106457	F
CSbapl.51867	0.166667	0	0	F
CSbapl.3198	0.441048	12.5991	0.246901	F
CSbapl.51865	0.6	0.511293	0.0390657	F
CSbapl.51864	0.692308	0.616944	0.0454579	F
CSbapl.47519	0.125	0	0	F
CSbapl.85060	0.148148	0	0	F
CSbapl.47510	0.845088	2.18814	0.10968	F
CSbapl.47511	0.166667	0.193883	0.0167638	F
CSbapl.47512	0.102151	0.559124	0.0420132	F
CSbapl.85069	0.0873016	0	0	F
CSbapl.56079	0.841622	1.44009	0.0843846	F
CSbapl.56078	0.567901	0.250825	0.0211713	F
CSbapl.56071	0.719561	1.86696	0.0996355	F
CSbapl.56070	0.571633	16.8536	0.272651	F
CSbapl.56073	0.791225	1.51195	0.0871301	F
CSbapl.19279	0.0952381	0	0	F
CSbapl.56075	0.784229	10.1517	0.228131	F
CSbapl.56077	0.431674	0.999749	0.0655584	F
CSbapl.43989	0.114943	0.0643855	0.00590269	F
CSbapl.43981	0.2	3.75368	0.147471	F
CSbapl.43980	0.0818182	0	0	F
CSbapl.43987	0.0666667	0	0	F
CSbapl.43986	0.153846	0	0	F
CSbapl.43985	0.0825688	0	0	F
CSbapl.43984	0.166667	0	0	F
CSbapl.16719	0.114943	0	0	F
CSbapl.16715	0.106762	0	0	F
CSbapl.16716	0.131148	17.9637	0.278357	F
CSbapl.50387	0.142857	0.0649358	0.00595159	F
CSbapl.16713	0.409091	20.9109	0.292022	F
CSbapl.89891	0.131148	0	0	F
CSbapl.89897	0.757143	0.397641	0.03167	F
CSbapl.89896	0.17094	4.52086	0.161624	F
CSbapl.89894	0.882773	13.1638	0.25075	F
CSbapl.52518	0.8125	0.712687	0.0508997	F
CSbapl.2822	0.614894	7.55269	0.20303	F
CSbapl.37206	0.109756	55.9644	0.382405	F
CSbapl.77629	0.12	0.0556593	0.00512394	F
CSbapl.40188	0.0816327	0	0	F
CSbapl.37200	0.0766129	0	0	F
CSbapl.77625	0.111111	0.276675	0.0231064	F
CSbapl.40187	0.157895	0	0	F
CSbapl.40184	0.102041	0	0	F
CSbapl.77621	0.0769231	0	0	F
CSbapl.40183	0.164671	0.146975	0.012972	F
CSbapl.40180	0.137931	0	0	F
CSbapl.77622	0.153846	0	0	F
CSbapl.81367	0.111111	0.562256	0.0422031	F
CSbapl.81361	0.101266	3.43775	0.140965	F
CSbapl.81363	0.735234	0.156303	0.0137382	F
CSbapl.81362	0.628889	12.5938	0.246864	F
CSbapl.44297	0.0820312	0	0	F
CSbapl.57850	0.117647	0.309018	0.0254731	F
CSbapl.57852	0.15625	0	0	F
CSbapl.49375	0.107692	5.97036	0.183678	F
CSbapl.49372	0.2	0.162555	0.0142483	F
CSbapl.49373	0.0909091	0	0	F
CSbapl.49370	0.166667	2.67105	0.123022	F
CSbapl.76242	0.202899	1.89677	0.100614	F
CSbapl.41581	0.776846	14.4164	0.258766	F
CSbapl.41583	0.0618557	0	0	F
CSbapl.41582	0.0464286	0.288218	0.0239578	F
CSbapl.90535	0.142857	0	0	F
CSbapl.45804	0.770026	1.60119	0.0904326	F
CSbapl.45807	0.0825688	0	0	F
CSbapl.45808	0.0714286	0	0	F
CSbapl.43959	0.4	1.18712	0.0740308	F
CSbapl.71708	0.0531915	0	0	F
CSbapl.23902	0.822454	7.33824	0.200628	F
CSbapl.71700	0.2	101.288	0.437779	F
CSbapl.71703	0.0597484	3.72029	0.146804	F
CSbapl.71704	0.0472637	0.247073	0.0208871	F
CSbapl.71705	0.0403397	0.0693835	0.00634585	F
CSbapl.71706	0.0803213	4.24276	0.156734	F
CSbapl.79579	0.0833333	7.69811	0.204625	F
CSbapl.79578	0.614693	99.3065	0.435929	F
CSbapl.79573	0.750337	36.0943	0.341826	F
CSbapl.79572	0.332707	6.19717	0.186707	F
CSbapl.79571	0.0987654	3.83896	0.149153	F
CSbapl.79570	0.703911	0	0	F
CSbapl.79577	0.736544	44.7823	0.361733	F
CSbapl.79575	0.753227	3.07591	0.132919	F
CSbapl.79574	0.845722	38.0396	0.346661	F
CSbapl.73636	0.115385	47.8099	0.36779	F
CSbapl.73637	0.177778	0	0	F
CSbapl.73635	0.117021	33.143	0.333983	F
CSbapl.78620	0.0952381	22.2119	0.297479	F
CSbapl.73633	0.0869565	0	0	F
CSbapl.73630	0.171717	0.0996047	0.00898214	F
CSbapl.73631	0.0683761	0	0	F
CSbapl.43950	0.166667	0.304193	0.0251238	F
CSbapl.6393	0.0740741	0.192876	0.016684	F
CSbapl.35159	0.2	0.193217	0.016711	F
CSbapl.43953	0.1	0.236762	0.0201018	F
CSbapl.76284	0.2	0.145509	0.0128511	F
CSbapl.76285	0.2	0	0	F
CSbapl.76287	0.1	3.2539	0.136962	F
CSbapl.76280	0.102273	7.52057	0.202674	F
CSbapl.76282	0.191489	0.101108	0.00911137	F
CSbapl.86205	0.111111	0	0	F
CSbapl.33456	0.813953	44.2301	0.360585	F
CSbapl.33455	0.897196	3.90649	0.150464	F
CSbapl.35154	0.0952381	1.16257	0.0729633	F
CSbapl.60128	0.0909091	10.674	0.232461	F
CSbapl.33458	0.0689655	1.50574	0.086896	F
CSbapl.33459	0.785714	0	0	F
CSbapl.35110	0.0833333	0	0	F
CSbapl.35113	0.5	0.130252	0.0115827	F
CSbapl.32324	0.285266	0.974104	0.0643374	F
CSbapl.32323	1	0.273653	0.0228822	F
CSbapl.32322	0.444444	4.05996	0.153377	F
CSbapl.35117	0.105263	0	0	F
CSbapl.38001	0.0888889	0.571565	0.0427651	F
CSbapl.35151	0.139535	2.17125	0.109178	F
CSbapl.35150	0.151515	1.14352	0.072126	F
CSbapl.73586	0.0722892	0	0	F
CSbapl.38004	0.141026	0	0	F
CSbapl.78371	0.166667	0	0	F
CSbapl.87035	0.102941	0	0	F
CSbapl.79399	0.117647	2802.38	0.750973	F
CSbapl.79398	0.113636	23.4906	0.302552	F
CSbapl.79397	0.593095	1.599	0.090353	F
CSbapl.68079	0.857143	4.54007	0.161952	F
CSbapl.79395	0.511364	1.95993	0.102655	F
CSbapl.79394	0.865546	1.63023	0.091483	F
CSbapl.79391	0.1	3.26977	0.137315	F
CSbapl.79390	0.176471	0.798828	0.0555418	F
CSbapl.26548	0.0818182	0.155846	0.0137009	F
CSbapl.54001	0.129956	9.70801	0.224291	F
CSbapl.54005	0.25431	0.398568	0.0317328	F
CSbapl.72947	0.761747	4.86101	0.16728	F
CSbapl.92935	0.0833333	21.5862	0.294894	F
CSbapl.27633	0.297619	0	0	F
CSbapl.92936	0.695266	34.1497	0.336732	F
CSbapl.72949	0.846847	2.80682	0.126458	F
CSbapl.27632	0.2	24.335	0.305758	F
CSbapl.66203	0.111111	0	0	F
CSbapl.22469	0.766917	6.83956	0.194794	F
CSbapl.69671	0.673913	0.64512	0.0470921	F
CSbapl.69673	0.302013	0.0667534	0.0061129	F
CSbapl.69674	0.79322	0.915445	0.0614839	F
CSbapl.69677	0.636364	0.46115	0.0358738	F
CSbapl.69678	0.803571	0.0748521	0.00682837	F
CSbapl.75396	0.142857	2.32394	0.113626	F
CSbapl.34242	0.142857	0	0	F
CSbapl.74629	0.113636	0.711698	0.0508451	F
CSbapl.65163	0.305369	0	0	F
CSbapl.65162	0.107143	1.19474	0.0743599	F
CSbapl.34247	0.366812	0.178953	0.0155734	F
CSbapl.74620	0.181818	3.29786	0.137935	F
CSbapl.65168	0.2	1.44125	0.0844297	F
CSbapl.34248	0.577444	0.435909	0.0342253	F
CSbapl.74623	0.0666667	0.0817814	0.00743626	F
CSbapl.74624	0.166667	0	0	F
CSbapl.74625	0.0714286	0	0	F
CSbapl.74626	0.115108	0.881513	0.0597931	F
CSbapl.74627	0.0789474	13.2911	0.251596	F
CSbapl.41558	0.0795455	196.322	0.499935	F
CSbapl.40979	0.751295	0.194107	0.0167816	F
CSbapl.15674	0.0555556	0.128771	0.0114586	F
CSbapl.40971	0.391304	0	0	F
CSbapl.89130	0.825397	0.220857	0.0188773	F
CSbapl.89135	0.157895	0.193316	0.0167189	F
CSbapl.31148	0.111111	0	0	F
CSbapl.31149	0.2	0	0	F
CSbapl.89139	0.766096	3.07658	0.132935	F
CSbapl.25000	0.0513393	0.139404	0.0123455	F
CSbapl.31140	0.121212	0	0	F
CSbapl.31141	0.136364	0	0	F
CSbapl.71482	0.739336	0.848738	0.0581307	F
CSbapl.71481	0.163265	0.545051	0.0411555	F
CSbapl.95803	0.126126	0	0	F
CSbapl.95805	0.111111	7.18166	0.198835	F
CSbapl.95804	0.157258	0	0	F
CSbapl.95807	0.303867	0.0425256	0.00393965	F
CSbapl.95806	0.0980392	0	0	F
CSbapl.95809	0.0909091	0	0	F
CSbapl.95808	0.0943396	0.615069	0.0453481	F
CSbapl.30890	0.169492	2.80133	0.126321	F
CSbapl.30897	0.0625	0.171362	0.0149623	F
CSbapl.30896	0.125	0.728355	0.0517611	F
CSbapl.82361	0.16302	338.225	0.55119	F
CSbapl.76918	0.0559441	0	0	F
CSbapl.29293	0.0733333	1.45544	0.0849778	F
CSbapl.76917	0.0441176	2.58594	0.120803	F
CSbapl.76912	0.625899	0	0	F
CSbapl.19878	0.0869565	0	0	F
CSbapl.15074	0.5	1.78435	0.0968697	F
CSbapl.10149	0.0925926	0.706743	0.0505708	F
CSbapl.19870	0.097561	0.196013	0.0169324	F
CSbapl.19871	0.0748299	0	0	F
CSbapl.19872	0.2	0	0	F
CSbapl.19873	0.12	0.0409568	0.00379719	F
CSbapl.19874	0.2	0	0	F
CSbapl.19876	0.1	0.563189	0.0422596	F
CSbapl.19877	0.142857	0.546843	0.0412651	F
CSbapl.43340	0.127273	0.363952	0.0293619	F
CSbapl.10144	0.170213	0	0	F
CSbapl.30234	0.0990099	7.16221	0.19861	F
CSbapl.30233	0.85101	36.7894	0.343582	F
CSbapl.85309	0.2	0.0303274	0.00282627	F
CSbapl.85307	0.0909091	0.119176	0.0106511	F
CSbapl.85304	0.146667	9.33545	0.220941	F
CSbapl.85301	0.184211	1.23067	0.075896	F
CSbapl.51373	0.0819672	0	0	F
CSbapl.19294	0.712397	17.9839	0.278457	F
CSbapl.19290	0.0858586	0	0	F
CSbapl.19291	0.10219	92.6021	0.429385	F
CSbapl.19292	0.142857	3.3607	0.139308	F
CSbapl.15732	0.166667	0.695596	0.0499509	F
CSbapl.15730	0.136364	0	0	F
CSbapl.15736	0.836323	0.659406	0.04791	F
CSbapl.15735	0.12	6.41481	0.189525	F
CSbapl.15734	0.153846	0	0	F
CSbapl.48544	0.0932203	0	0	F
CSbapl.48545	0.113924	5.31189	0.174291	F
CSbapl.48543	0.114943	0	0	F
CSbapl.48540	0.0412574	0	0	F
CSbapl.48541	0.135385	0.134041	0.0118992	F
CSbapl.66251	0.0888889	0.465544	0.0361578	F
CSbapl.19129	0.1	0	0	F
CSbapl.19122	0.181818	0.149133	0.0131498	F
CSbapl.19121	0.857143	6.34793	0.188668	F
CSbapl.1620	0.119403	0.426045	0.0335733	F
CSbapl.1623	0.0657895	0.517249	0.0394378	F
CSbapl.1624	0.0666667	3.1184	0.1339	F
CSbapl.1626	0.0533333	1.15123	0.0724657	F
CSbapl.34086	0.609665	1.3455	0.0806447	F
CSbapl.72111	0.767932	2.2604	0.111801	F
CSbapl.72113	0.166667	69.6169	0.402729	F
CSbapl.9452	0.0819672	0	0	F
CSbapl.72116	0.173913	0	0	F
CSbapl.72118	0.849076	7.62113	0.203784	F
CSbapl.72119	0.872532	1.37636	0.0818811	F
CSbapl.9458	0.838932	0.621592	0.0457294	F
CSbapl.65985	0.084507	0.441	0.0345602	F
CSbapl.72982	0.656526	0.666746	0.0483275	F
CSbapl.65989	0.0895522	0	0	F
CSbapl.14068	0.178571	0	0	F
CSbapl.14062	0.0909091	0	0	F
CSbapl.97519	0.125	4.74608	0.165406	F
CSbapl.58059	0.772197	2.40535	0.115915	F
CSbapl.58058	0.792916	20.206	0.288929	F
CSbapl.58055	0.193548	0.145697	0.0128665	F
CSbapl.97513	0.0787402	0	0	F
CSbapl.58056	0.155556	8.64893	0.214439	F
CSbapl.97515	0.616477	4.22661	0.156443	F
CSbapl.97514	0.117647	0	0	F
CSbapl.58053	0.0956522	0	0	F
CSbapl.23282	0.0961538	1.28466	0.0781586	F
CSbapl.36308	0.123077	0	0	F
CSbapl.96649	0.119403	0	0	F
CSbapl.36301	0.125	0	0	F
CSbapl.39172	0.142857	0.680405	0.0490996	F
CSbapl.96640	0.0520833	0	0	F
CSbapl.36302	0.111111	0	0	F
CSbapl.39177	0.108911	0.119646	0.0106907	F
CSbapl.36304	0.135593	0	0	F
CSbapl.96644	0.142857	0.733725	0.0520546	F
CSbapl.33150	0.0769231	0	0	F
CSbapl.782	0.884533	0.522957	0.039793	F
CSbapl.783	0.815735	7.03389	0.197111	F
CSbapl.781	0.72611	18.4835	0.280915	F
CSbapl.787	0.792647	5.69997	0.179935	F
CSbapl.785	0.789404	14.1554	0.257151	F
CSbapl.789	0.743396	15.0173	0.262384	F
CSbapl.91917	0.846918	21.5421	0.294709	F
CSbapl.91916	0.117647	0.266296	0.0223342	F
CSbapl.91912	0.112903	0.0444432	0.00411349	F
CSbapl.22483	0.142857	0.15257	0.0134323	F
CSbapl.91919	0.114583	15.7244	0.26647	F
CSbapl.67857	0.05	0	0	F
CSbapl.67855	0.0961538	0	0	F
CSbapl.7503	0.132075	0.809442	0.0560983	F
CSbapl.17609	0.0943396	0	0	F
CSbapl.24885	0.0909091	0	0	F
CSbapl.24887	0.1	0.301398	0.0249208	F
CSbapl.29874	0.1	0.142009	0.0125616	F
CSbapl.13779	0.10101	0.102623	0.00924145	F
CSbapl.24880	0.184211	0.344919	0.0280326	F
CSbapl.29871	0.295238	0.252207	0.0212758	F
CSbapl.29870	0.116667	0.681877	0.0491824	F
CSbapl.13775	0.1	0	0	F
CSbapl.98397	0.230769	0.568325	0.0425698	F
CSbapl.12709	0.4	0.198924	0.0171624	F
CSbapl.13771	0.0677966	0.042244	0.00391409	F
CSbapl.13770	0.0425532	0.0844166	0.00766642	F
CSbapl.29879	0.107143	0.247675	0.0209328	F
CSbapl.29878	0.185185	0.477502	0.0369266	F
CSbapl.22734	0.244444	0.192392	0.0166456	F
CSbapl.22736	0.571429	1.49071	0.086327	F
CSbapl.22733	0.233333	0	0	F
CSbapl.22739	0.796154	0.62115	0.0457037	F
CSbapl.101109	0.497136	1.00543	0.0658268	F
CSbapl.101107	0.25	0	0	F
CSbapl.38220	0.146341	1.99855	0.103881	F
CSbapl.24776	0.0645161	5.20141	0.17262	F
CSbapl.24775	0.0769231	2.08594	0.106598	F
CSbapl.24774	0.0666667	5.64321	0.17913	F
CSbapl.35653	0.0961538	1.30116	0.078839	F
CSbapl.35650	0.0687831	0	0	F
CSbapl.61180	0.0967742	23.9253	0.304216	F
CSbapl.35656	0.0204778	0	0	F
CSbapl.35657	0.09375	0	0	F
CSbapl.94730	0.103448	0	0	F
CSbapl.94731	0.181818	0.452218	0.0352937	F
CSbapl.80215	0.0791367	0.268938	0.0225313	F
CSbapl.80212	0.0694444	0	0	F
CSbapl.94735	0.194444	18.0375	0.278725	F
CSbapl.80211	0.0604396	0	0	F
CSbapl.94739	0.856595	19.7906	0.287057	F
CSbapl.80219	0.0456274	0.794509	0.0553144	F
CSbapl.46912	0.787261	0.136079	0.012069	F
CSbapl.46914	0.832168	4.05699	0.153322	F
CSbapl.77506	0.108696	0	0	F
CSbapl.11609	0.770048	23.5597	0.302818	F
CSbapl.60858	0.0588235	6.26615	0.187609	F
CSbapl.60859	0.0588235	0	0	F
CSbapl.11603	0.114286	0.276558	0.0230977	F
CSbapl.60857	0.701087	5.78547	0.181135	F
CSbapl.11601	0.0862069	0	0	F
CSbapl.11607	0.0923077	1.78471	0.0968818	F
CSbapl.60853	0.0754717	0	0	F
CSbapl.11604	0.111111	0	0	F
CSbapl.10954	0.744444	5.96738	0.183637	F
CSbapl.10955	0.878816	24.7852	0.307424	F
CSbapl.3971	0.0674487	0	0	F
CSbapl.3977	0.88	0	0	F
CSbapl.10951	0.830998	4.59302	0.162852	F
CSbapl.10953	0.744444	15.7125	0.266403	F
CSbapl.61727	0.111111	1.98953	0.103596	F
CSbapl.61726	0.0788229	0	0	F
CSbapl.61725	0.125	0.0641139	0.00587854	F
CSbapl.3978	0.776699	0.186918	0.0162103	F
CSbapl.61722	0.0913043	0	0	F
CSbapl.61721	0.0625	0	0	F
CSbapl.61720	0.15859	0.0879626	0.00797524	F
CSbapl.93420	0.8	29.139	0.322184	F
CSbapl.93423	0.140625	3.51587	0.142616	F
CSbapl.93422	0.0952381	8.81483	0.216052	F
CSbapl.93426	0.0626703	0.683882	0.0492951	F
CSbapl.93429	0.0722222	0	0	F
CSbapl.93428	0.0718954	0	0	F
CSbapl.69530	0.142857	0.0180678	0.00169392	F
CSbapl.69531	0.08	3.15191	0.134667	F
CSbapl.69536	0.741176	0.0683882	0.00625776	F
CSbapl.69537	0.821782	0	0	F
CSbapl.28087	0.0337423	0.500612	0.0383948	F
CSbapl.81165	0.12766	23.5093	0.302624	F
CSbapl.20250	0.166667	0	0	F
CSbapl.65123	0.387755	13.0789	0.250181	F
CSbapl.81160	0.0714286	27.5532	0.317071	F
CSbapl.81169	0.142857	0	0	F
CSbapl.99908	0.639353	0.522764	0.039781	F
CSbapl.90735	0.113208	0	0	F
CSbapl.90736	0.0814815	0	0	F
CSbapl.90737	0.731497	18.7647	0.282271	F
CSbapl.90730	0.16129	0	0	F
CSbapl.90731	0.0752688	5.81147	0.181496	F
CSbapl.2676	0.29078	0	0	F
CSbapl.90738	0.13986	0.0281042	0.00262193	F
CSbapl.90739	0.721793	0.0783247	0.0071335	F
CSbapl.21612	0.0650407	0	0	F
CSbapl.93287	0.694118	2.29844	0.112898	F
CSbapl.21610	0.0592784	0	0	F
CSbapl.21616	0.117073	0	0	F
CSbapl.21615	0.0430108	0	0	F
CSbapl.21614	0.0482574	0	0	F
CSbapl.21618	0.156522	0	0	F
CSbapl.92772	0.0680272	0.0168902	0.00158444	F
CSbapl.92776	0.233333	0.921096	0.0617626	F
CSbapl.92777	0.0927152	14.0041	0.256202	F
CSbapl.92774	0.672439	0.273695	0.0228853	F
CSbapl.67072	0.111111	0	0	F
CSbapl.92778	0.666667	1.3355	0.0802405	F
CSbapl.67078	0.0909091	0.174877	0.0152457	F
CSbapl.90883	0.133333	0	0	F
CSbapl.63767	0.122951	0	0	F
CSbapl.63760	0.117647	0	0	F
CSbapl.19170	0.117647	0	0	F
CSbapl.90889	0.0769231	0.0616725	0.00566126	F
CSbapl.63768	0.119048	0.03342	0.00310978	F
CSbapl.59046	0.387597	4.83484	0.166856	F
CSbapl.53024	0.0734694	0	0	F
CSbapl.53029	0.0754567	9.77217	0.224856	F
CSbapl.92488	0.508	7.57945	0.203326	F
CSbapl.57910	0.125	22.909	0.300278	F
CSbapl.57912	0.369565	9.0043	0.21786	F
CSbapl.21922	0.117647	0	0	F
CSbapl.92484	0.1	104.879	0.441044	F
CSbapl.92485	0.829114	54.5892	0.380093	F
CSbapl.92486	0.655093	20.0907	0.288413	F
CSbapl.92487	0.194357	0.993504	0.0652626	F
CSbapl.25912	0.0714286	0.0484949	0.00447975	F
CSbapl.25919	0.0888889	7.5021	0.202469	F
CSbapl.29023	0.15625	0	0	F
CSbapl.29024	0.405063	1.59453	0.0901903	F
CSbapl.86309	0.142857	0.18968	0.0164302	F
CSbapl.86306	0.0743802	6.89688	0.195484	F
CSbapl.29029	0.2	5.58643	0.178318	F
CSbapl.86303	0.105263	0.502072	0.0384868	F
CSbapl.27518	0.129032	0.176573	0.0153822	F
CSbapl.27516	0.2	0.434286	0.0341183	F
CSbapl.27512	0.0666667	0.963242	0.0638155	F
CSbapl.71869	0.12766	0	0	F
CSbapl.44661	0.0351288	0	0	F
CSbapl.44660	0.0379147	0	0	F
CSbapl.44667	0.0273973	0	0	F
CSbapl.44665	0.05	0	0	F
CSbapl.44668	0.0327273	0	0	F
CSbapl.99702	0.128205	10.7059	0.232719	F
CSbapl.99703	0.717049	0	0	F
CSbapl.99707	0.0616114	0	0	F
CSbapl.54242	0.12	0	0	F
CSbapl.54243	0.117647	0	0	F
CSbapl.45390	0.701126	24.9184	0.307912	F
CSbapl.99708	0.0963855	0.779562	0.0545231	F
CSbapl.45394	0.108108	20.3123	0.289402	F
CSbapl.54249	0.0746269	0	0	F
CSbapl.45396	0.079646	0	0	F
CSbapl.91462	0.0898876	0.0799736	0.00727804	F
CSbapl.42621	0.0898204	9.92749	0.22621	F
CSbapl.42624	0.132075	0	0	F
CSbapl.42626	0.106383	0	0	F
CSbapl.5469	0.587031	20.4315	0.28993	F
CSbapl.5468	0.735228	0.49645	0.038132	F
CSbapl.5463	0.0700935	6.16447	0.186276	F
CSbapl.5461	0.124088	40.9482	0.353459	F
CSbapl.5460	0.0704846	5.29728	0.174071	F
CSbapl.82531	0.20059	0.0838067	0.0076132	F
CSbapl.82533	0.0817308	12.6966	0.247577	F
CSbapl.4585	0.809384	0.882012	0.0598182	F
CSbapl.51542	0.702422	17.6599	0.276829	F
CSbapl.51545	0.546318	1.0759	0.0690939	F
CSbapl.66849	0.813559	3.62274	0.144828	F
CSbapl.66847	0.119048	0.772579	0.0541512	F
CSbapl.66843	0.185185	6.50621	0.190684	F
CSbapl.66841	0.111111	6.09175	0.185311	F
CSbapl.66840	0.0581395	14.8999	0.261687	F
CSbapl.57263	0.491667	3.10288	0.133543	F
CSbapl.52089	0.694146	0	0	F
CSbapl.57267	0.0277033	0.0229837	0.0021496	F
CSbapl.57266	0.0987654	1.06507	0.0685988	F
CSbapl.57265	0.0869565	0.0552545	0.00508766	F
CSbapl.57264	0.599455	7.34375	0.200691	F
CSbapl.57268	0.0508475	0.0513115	0.00473353	F
CSbapl.52085	0.109244	0	0	F
CSbapl.50421	0.197861	0.543449	0.0410573	F
CSbapl.56799	0.565465	0.0825814	0.00750619	F
CSbapl.28868	0.214286	0.836622	0.0575087	F
CSbapl.28867	0.24	0.0231424	0.00216428	F
CSbapl.28866	0.389313	0.0813902	0.00740205	F
CSbapl.28865	0.823529	0.416363	0.0329288	F
CSbapl.56794	0.783518	0.460862	0.0358551	F
CSbapl.28862	0.07	6.01333	0.184259	F
CSbapl.56796	0.15	2.1401	0.108244	F
CSbapl.28553	0.12	0	0	F
CSbapl.81947	0.197368	1.24817	0.0766352	F
CSbapl.81946	0.125	0	0	F
CSbapl.45539	0.10989	6.51127	0.190748	F
CSbapl.81478	0.097561	42.5133	0.356924	F
CSbapl.45534	0.0601093	0	0	F
CSbapl.45535	0.0421286	0	0	F
CSbapl.45536	0.034565	0	0	F
CSbapl.45537	0.056338	0.0210345	0.00196918	F
CSbapl.81949	0.514908	5.37434	0.175222	F
CSbapl.55998	0.0539846	0	0	F
CSbapl.31300	0.166667	21.1582	0.293084	F
CSbapl.31301	0.153846	0	0	F
CSbapl.31302	0.133333	0	0	F
CSbapl.31304	0.055814	0.671796	0.0486137	F
CSbapl.31307	0.318182	2.34759	0.114297	F
CSbapl.13822	0.133333	0	0	F
CSbapl.2167	0.132075	0	0	F
CSbapl.2163	0.0714286	30.467	0.326263	F
CSbapl.39870	0.173913	0.688412	0.0495493	F
CSbapl.2161	0.136364	0.546306	0.0412323	F
CSbapl.2160	0.0877193	0.550579	0.0414933	F
CSbapl.84279	0.228022	0.736578	0.0522102	F
CSbapl.55688	0.09375	0.990137	0.0651026	F
CSbapl.56139	0.111111	0	0	F
CSbapl.56136	0.0918367	0	0	F
CSbapl.53561	0.157895	0.29655	0.0245678	F
CSbapl.2781	0.125	0	0	F
CSbapl.2784	0.0621762	0.0498023	0.00459764	F
CSbapl.84899	0.0923077	0.934845	0.0624372	F
CSbapl.26066	0.0306122	0	0	F
CSbapl.89449	0.1	6.27883	0.187774	F
CSbapl.89446	0.15	0	0	F
CSbapl.78984	0.0779817	0.868609	0.0591421	F
CSbapl.78981	0.380208	11.2077	0.23669	F
CSbapl.78983	0.52111	11.6648	0.240168	F
CSbapl.78982	0.431307	2.01005	0.104243	F
CSbapl.3780	0.0888889	0.451349	0.0352371	F
CSbapl.48709	0.747984	25.9425	0.311578	F
CSbapl.3783	0.0882353	0.047783	0.0044155	F
CSbapl.3784	0.0759494	0.230227	0.0196006	F
CSbapl.3788	0.137405	90.6336	0.427374	F
CSbapl.48701	0.08	37.0999	0.344356	F
CSbapl.48702	0.5625	8.30815	0.211038	F
CSbapl.48703	0.0787208	0.0247879	0.00231629	F
CSbapl.48706	0.78	4.18548	0.155695	F
CSbapl.47701	0.0869565	0.0923607	0.00835689	F
CSbapl.40571	0.372004	0.0925696	0.00837498	F
CSbapl.47702	0.140845	0	0	F
CSbapl.47705	0.103448	0	0	F
CSbapl.47704	0.097561	0	0	F
CSbapl.40575	0.0878661	1.89982	0.100714	F
CSbapl.40574	0.0974026	2.1529	0.108629	F
CSbapl.41625	0.2	0.0508193	0.00468924	F
CSbapl.41620	0.108844	0	0	F
CSbapl.41622	0.0677966	0	0	F
CSbapl.72352	0.171079	0.114378	0.0102446	F
CSbapl.72353	0.111111	1.33268	0.0801262	F
CSbapl.72351	0.0441176	1.83628	0.0986178	F
CSbapl.72356	0.177546	3.6018	0.144399	F
CSbapl.77187	0.105882	0	0	F
CSbapl.4787	0.0641026	0	0	F
CSbapl.72359	0.236364	1.28086	0.0780009	F
CSbapl.4781	0.153846	0.203706	0.0175389	F
CSbapl.4783	0.111111	1.48549	0.0861287	F
CSbapl.68915	0.2	0	0	F
CSbapl.68913	0.166667	0.185989	0.0161363	F
CSbapl.68912	0.775446	25.6322	0.310482	F
CSbapl.68910	0.884808	12.1535	0.243749	F
CSbapl.40399	0.0390625	0.483539	0.0373123	F
CSbapl.37077	0.166667	0.0801072	0.00728975	F
CSbapl.37078	0.328125	4.38175	0.15921	F
CSbapl.37079	0.142857	0.895952	0.0605163	F
CSbapl.4257	0.0909091	1.85842	0.0993534	F
CSbapl.4255	0.329384	8.05915	0.208473	F
CSbapl.4254	0.207729	0.203873	0.0175521	F
CSbapl.4253	0.1875	0	0	F
CSbapl.4252	0.0962099	0	0	F
CSbapl.4250	0.0785714	0.0440434	0.00407727	F
CSbapl.33798	0.807584	1.29368	0.0785313	F
CSbapl.74193	0.1	3.35934	0.139279	F
CSbapl.33791	0.834499	11.3005	0.237407	F
CSbapl.33792	0.771772	3.74879	0.147373	F
CSbapl.33794	0.0900901	1.72198	0.0947266	F
CSbapl.74198	0.105263	0	0	F
CSbapl.70860	0.2	0	0	F
CSbapl.36671	0.0923077	10.5125	0.231144	F
CSbapl.36670	0.782082	6.73811	0.193562	F
CSbapl.36672	0.133333	69.4095	0.402451	F
CSbapl.17267	0.402273	2.43535	0.116745	F
CSbapl.44949	0.0952381	0.515717	0.0393422	F
CSbapl.71119	0.15	0	0	F
CSbapl.71118	0.107143	1.16616	0.07312	F
CSbapl.76328	0.2	0	0	F
CSbapl.76326	0.044665	0.052689	0.0048574	F
CSbapl.76325	0.0612245	0.0494388	0.00456488	F
CSbapl.76323	0.110236	0	0	F
CSbapl.71117	0.138889	0	0	F
CSbapl.70249	0.880679	0.97315	0.0642917	F
CSbapl.24578	0.0398323	0	0	F
CSbapl.24574	0.825758	4.402	0.159565	F
CSbapl.70240	0.75	6.31515	0.188245	F
CSbapl.24576	0.133333	0.226974	0.0193501	F
CSbapl.70244	0.824705	26.3676	0.313059	F
CSbapl.64118	0.0967742	0	0	F
CSbapl.78470	0.133333	0	0	F
CSbapl.64113	0.133333	0.184122	0.0159872	F
CSbapl.64112	0.126984	2.05132	0.105531	F
CSbapl.64111	0.136364	142.697	0.469934	F
CSbapl.64110	0.140768	0	0	F
CSbapl.91965	0.730929	2.21764	0.110552	F
CSbapl.9206	0.253012	0.162344	0.0142312	F
CSbapl.88188	0.178236	1.95104	0.10237	F
CSbapl.73579	0.106061	127.928	0.459676	F
CSbapl.75749	0.166667	0	0	F
CSbapl.35326	0.272727	0	0	F
CSbapl.35327	0.127273	0	0	F
CSbapl.35324	0.178571	0	0	F
CSbapl.35325	0.166667	0.0377047	0.00350119	F
CSbapl.75741	0.0723684	0.0621472	0.00570354	F
CSbapl.75742	0.166667	0	0	F
CSbapl.35329	0.0729167	0	0	F
CSbapl.75747	0.2	0	0	F
CSbapl.87203	0.1125	2.48543	0.118114	F
CSbapl.87204	0.886729	32.9369	0.333411	F
CSbapl.87205	0.48	0.6708	0.0485574	F
CSbapl.87206	0.0779221	0.464675	0.0361017	F
CSbapl.87207	0.133333	0	0	F
CSbapl.87208	0.148649	83.3518	0.419541	F
CSbapl.87209	0.162488	2.0853	0.106579	F
CSbapl.91969	0.16129	4.23335	0.156564	F
CSbapl.69734	0.142857	0.58888	0.0438016	F
CSbapl.69735	0.0821918	0	0	F
CSbapl.69736	0.0877193	0.304964	0.0251796	F
CSbapl.69737	0.0714286	0.0799736	0.00727804	F
CSbapl.69731	0.105263	0.781135	0.0546067	F
CSbapl.69739	0.0849057	0.740715	0.0524352	F
CSbapl.67823	0.1	1.92695	0.101594	F
CSbapl.62616	0.4	0.527159	0.0400536	F
CSbapl.65642	0.116667	0	0	F
CSbapl.67821	0.125	0	0	F
CSbapl.65648	0.075	2.15348	0.108646	F
CSbapl.62618	0.166667	0	0	F
CSbapl.62619	0.111111	0.015452	0.00145055	F
CSbapl.69882	0.107143	4.88669	0.167693	F
CSbapl.69881	0.142857	13.4788	0.252831	F
CSbapl.69884	0.125	7.46835	0.202093	F
CSbapl.11045	0.131474	0.915488	0.0614861	F
CSbapl.65393	0.142857	0	0	F
CSbapl.65391	0.270408	0	0	F
CSbapl.65394	0.563758	0.338062	0.027549	F
CSbapl.65395	0.74216	0	0	F
CSbapl.55144	0.809524	0.0718554	0.00656426	F
CSbapl.67329	0.0958904	0	0	F
CSbapl.30918	0.898221	0.619701	0.045619	F
CSbapl.30919	0.37069	0.28154	0.0234662	F
CSbapl.30917	0.1	12.8056	0.248326	F
CSbapl.10021	0.0641026	1.51956	0.0874164	F
CSbapl.14158	0.688261	13.2911	0.251596	F
CSbapl.13958	0.136792	0	0	F
CSbapl.24835	0.0642202	0	0	F
CSbapl.13956	0.108108	0	0	F
CSbapl.98349	0.0688259	0.830243	0.0571796	F
CSbapl.53751	0.114754	0.0376113	0.00349268	F
CSbapl.19782	0.2	0	0	F
CSbapl.20984	0.111111	0.751232	0.0530051	F
CSbapl.20985	0.732673	3.58033	0.143956	F
CSbapl.19629	0.192118	0.592783	0.0440337	F
CSbapl.21055	0.117909	0.573813	0.0429003	F
CSbapl.8205	0.2	1.02404	0.0667006	F
CSbapl.21057	0.0594059	0.556932	0.0418801	F
CSbapl.19622	0.133333	1.211	0.0750583	F
CSbapl.19625	0.2	0	0	F
CSbapl.19624	0.113636	0	0	F
CSbapl.19627	0.0952381	13.5859	0.253527	F
CSbapl.8203	0.08	2.79124	0.12607	F
CSbapl.64939	0.18663	0	0	F
CSbapl.14458	0.122807	0.137293	0.0121701	F
CSbapl.9555	0.111111	4.21243	0.156186	F
CSbapl.64931	0.0697674	0.115527	0.0103421	F
CSbapl.14450	0.795244	1.06454	0.0685746	F
CSbapl.64933	0.147059	3.92068	0.150737	F
CSbapl.9558	0.10989	0	0	F
CSbapl.14454	0.0833333	4.30361	0.157826	F
CSbapl.14456	0.604982	7.32691	0.2005	F
CSbapl.38857	0.166667	32.8476	0.333162	F
CSbapl.38855	0.137931	0.440951	0.0345569	F
CSbapl.38851	0.142857	0.193863	0.0167622	F
CSbapl.38850	0.125	0.101546	0.00914901	F
CSbapl.38858	0.173913	0	0	F
CSbapl.42428	0.106667	0.0887502	0.00804371	F
CSbapl.27063	0.129032	8.22427	0.210181	F
CSbapl.27060	0.0923077	0	0	F
CSbapl.27061	0.737463	4.36552	0.158924	F
CSbapl.97497	0.407407	0.304115	0.0251181	F
CSbapl.97490	0.223881	1.63258	0.0915674	F
CSbapl.27068	0.111111	1.48958	0.0862841	F
CSbapl.97493	0.246269	0	0	F
CSbapl.23981	0.130435	0.179694	0.0156328	F
CSbapl.15508	0.555556	0.664693	0.0482109	F
CSbapl.23987	0.0958904	0	0	F
CSbapl.15502	0.56	0.201106	0.0173344	F
CSbapl.59538	0.111111	0.26736	0.0224137	F
CSbapl.1789	0.111111	0.0573805	0.00527805	F
CSbapl.59535	0.1	0	0	F
CSbapl.1787	0.0847458	0	0	F
CSbapl.1784	0.05	0	0	F
CSbapl.59536	0.133333	0	0	F
CSbapl.1782	0.0909091	12.3934	0.245459	F
CSbapl.59533	0.125	3.5018	0.14232	F
CSbapl.42390	0.133333	0	0	F
CSbapl.42393	0.0697674	0	0	F
CSbapl.42396	0.07	0	0	F
CSbapl.42398	0.142857	0	0	F
CSbapl.97726	0.43299	4.18233	0.155638	F
CSbapl.97724	0.1	29.2442	0.322513	F
CSbapl.10367	0.0764706	0	0	F
CSbapl.10366	0.125	0.229824	0.0195696	F
CSbapl.10362	0.478261	0.166065	0.0145336	F
CSbapl.13193	0.668161	0.458546	0.0357051	F
CSbapl.6067	0.0865385	0.634807	0.0464972	F
CSbapl.6065	0.105263	11.2039	0.236661	F
CSbapl.18176	0.730159	22.9914	0.300603	F
CSbapl.18174	0.0519481	0.420045	0.0331744	F
CSbapl.18178	0.768116	2.91758	0.129171	F
CSbapl.18179	0.0561497	0.12254	0.010935	F
CSbapl.6069	0.133333	12.2852	0.244692	F
CSbapl.7337	0.166667	0.148275	0.0130792	F
CSbapl.7332	0.196721	6.04899	0.184739	F
CSbapl.7338	0.109589	0.0503156	0.00464388	F
CSbapl.23364	0.084507	2.30531	0.113095	F
CSbapl.23367	0.116883	0	0	F
CSbapl.23361	0.117647	0	0	F
CSbapl.60134	0.1	0.365643	0.0294791	F
CSbapl.60136	0.0838323	3.96558	0.151596	F
CSbapl.60131	0.314465	2.54207	0.119639	F
CSbapl.60130	0.0930233	1.57239	0.0893794	F
CSbapl.60132	0.835378	2.58284	0.120722	F
CSbapl.620	0.605578	13.1279	0.25051	F
CSbapl.95380	0.593567	1.01969	0.0664971	F
CSbapl.622	0.109091	0.0428519	0.00396925	F
CSbapl.625	0.745763	1.68681	0.0934963	F
CSbapl.95387	0.32997	0	0	F
CSbapl.95384	0.741848	5.12025	0.171374	F
CSbapl.91898	0.833055	2.09333	0.106825	F
CSbapl.91899	0.166667	0.179199	0.0155931	F
CSbapl.91892	0.120879	4.9357	0.168477	F
CSbapl.56	0.903339	0.540979	0.0409058	F
CSbapl.91891	0.125	2.24349	0.111309	F
CSbapl.91896	0.111111	0.871934	0.0593103	F
CSbapl.91897	0.107143	0.0748521	0.00682837	F
CSbapl.50	0.156863	0.535807	0.0405878	F
CSbapl.26858	0.2	0	0	F
CSbapl.99985	0.111111	0.155585	0.0136795	F
CSbapl.99980	0.0952381	2.09886	0.106993	F
CSbapl.99981	0.125	0.0389615	0.00361569	F
CSbapl.26850	0.121212	1.05123	0.0679627	F
CSbapl.26852	0.568401	0.316929	0.026043	F
CSbapl.99988	0.166667	0.539625	0.0408227	F
CSbapl.99989	0.1	0	0	F
CSbapl.83976	0.0839695	0.120915	0.0107979	F
CSbapl.95654	0.113754	0	0	F
CSbapl.96614	0.0606061	0.112672	0.0100997	F
CSbapl.91760	0.763685	43.5787	0.359213	F
CSbapl.91761	0.2	5.28977	0.173958	F
CSbapl.91766	0.795113	0.338821	0.0276027	F
CSbapl.91767	0.62845	1749.98	0.706451	F
CSbapl.35905	0.153846	60.9873	0.390399	F
CSbapl.15773	0.595	0.978711	0.064558	F
CSbapl.18828	0.0867347	0.304952	0.0251788	F
CSbapl.18829	0.08	0	0	F
CSbapl.17839	0.136364	0.0799736	0.00727804	F
CSbapl.17836	0.253012	0	0	F
CSbapl.17834	0.1	30.8418	0.327383	F
CSbapl.18821	0.0426829	2.44877	0.117114	F
CSbapl.18822	0.0551724	3.37874	0.139698	F
CSbapl.13108	0.636787	0.14804	0.0130598	F
CSbapl.98586	0.188406	0.285184	0.0237348	F
CSbapl.98585	0.2607	0.117053	0.0104715	F
CSbapl.13103	0.324653	0.0945256	0.00854418	F
CSbapl.98581	0.0945946	0	0	F
CSbapl.38275	0.724891	0.305856	0.0252443	F
CSbapl.46898	0.0952381	0.593968	0.044104	F
CSbapl.48503	0.0890585	0.0530531	0.00489012	F
CSbapl.90389	0.097561	0.812901	0.056279	F
CSbapl.100041	0.0576923	0.443525	0.0347257	F
CSbapl.46892	0.297872	36.533	0.342938	F
CSbapl.100046	0.153846	0	0	F
CSbapl.98635	0.166667	0.0983947	0.00887799	F
CSbapl.38074	0.861514	0.801523	0.0556834	F
CSbapl.38077	0.787276	0	0	F
CSbapl.38076	0.576923	1.68873	0.0935639	F
CSbapl.3542	0.155172	0	0	F
CSbapl.3541	0.134831	0.0806324	0.00733573	F
CSbapl.98639	0.166667	0.0725691	0.00662723	F
CSbapl.98638	0.15	58.3898	0.38635	F
CSbapl.3548	0.643617	0.197911	0.0170824	F
CSbapl.80406	0.833609	1.72438	0.09481	F
CSbapl.93878	0.11236	0	0	F
CSbapl.80401	0.112069	0.0666208	0.00610115	F
CSbapl.80147	0.0803571	0.106971	0.00961374	F
CSbapl.80408	0.0923077	0	0	F
CSbapl.20045	0.0567376	0	0	F
CSbapl.25036	0.16	0	0	F
CSbapl.20047	0.036225	0	0	F
CSbapl.25034	0.876607	1.69668	0.0938431	F
CSbapl.25033	0.62766	66.8466	0.398943	F
CSbapl.25032	0.88035	8.93536	0.217206	F
CSbapl.20042	0.0666667	0.0436637	0.00404287	F
CSbapl.82312	0.108108	0	0	F
CSbapl.86802	0.108108	2.62009	0.1217	F
CSbapl.51362	0.102041	2.00495	0.104082	F
CSbapl.51363	0.111111	0.0549172	0.00505742	F
CSbapl.52949	0.0833333	0	0	F
CSbapl.66269	0.0821918	0	0	F
CSbapl.51367	0.324675	5.30051	0.17412	F
CSbapl.51369	0.0892857	0.135669	0.012035	F
CSbapl.66265	0.11822	1.02672	0.066826	F
CSbapl.66262	0.385435	0.646433	0.0471676	F
CSbapl.66260	0.347826	0.427219	0.0336511	F
CSbapl.47271	0.168317	0	0	F
CSbapl.47270	0.672269	1.13953	0.0719498	F
CSbapl.73227	0.103774	0.033642	0.00313011	F
CSbapl.12271	0.092	0.145138	0.0128204	F
CSbapl.90964	0.0857143	0.500934	0.038415	F
CSbapl.90966	0.133333	0.491024	0.0377884	F
CSbapl.90961	0.142857	0.125578	0.0111907	F
CSbapl.90963	0.101266	0.104793	0.00942744	F
CSbapl.90962	0.0833333	1.59658	0.090265	F
CSbapl.90969	0.108642	2.73672	0.1247	F
CSbapl.4014	0.392027	0.615794	0.0453906	F
CSbapl.4010	0.0991736	7.30045	0.200199	F
CSbapl.68201	0.0417582	0.181976	0.0158156	F
CSbapl.47855	0.145833	0.570025	0.0426723	F
CSbapl.47857	0.169697	2.53113	0.119347	F
CSbapl.47850	0.133333	31.9816	0.33071	F
CSbapl.47853	0.0909091	4.85793	0.16723	F
CSbapl.47852	0.0983607	4.14706	0.154992	F
CSbapl.47858	0.166667	2.01281	0.104329	F
CSbapl.28545	0.0671642	228.478	0.514216	F
CSbapl.28547	0.0697674	0	0	F
CSbapl.81466	0.0930233	0	0	F
CSbapl.39846	0.115385	0.339904	0.0276791	F
CSbapl.39843	0.0731707	0	0	F
CSbapl.33801	0.16	0.151669	0.0133584	F
CSbapl.33800	0.129032	0.203168	0.0174967	F
CSbapl.33803	0.0764755	0.0855132	0.00776203	F
CSbapl.33807	0.540816	1.87625	0.0999416	F
CSbapl.26079	0.2	3.89247	0.150193	F
CSbapl.26077	0.81003	3.30415	0.138073	F
CSbapl.26072	0.538786	0.602807	0.0446272	F
CSbapl.26073	0.254144	0.439313	0.0344493	F
CSbapl.83197	0.165385	0	0	F
CSbapl.83190	0.0921986	0.4397	0.0344748	F
CSbapl.83191	0.122951	0.677162	0.0489169	F
CSbapl.83193	0.802721	0.570433	0.0426969	F
CSbapl.92523	0.132075	0	0	F
CSbapl.60676	0.131291	2.68945	0.123496	F
CSbapl.99512	0.0797101	0.391287	0.031239	F
CSbapl.99510	0.115385	0.10672	0.00959233	F
CSbapl.99518	0.148148	0	0	F
CSbapl.78277	0.178571	22.1227	0.297114	F
CSbapl.78276	0.11828	1.12001	0.0710827	F
CSbapl.78275	0.125	0.432805	0.0340206	F
CSbapl.78270	0.0742574	0	0	F
CSbapl.4902	0.0747664	0	0	F
CSbapl.4900	0.0487805	0	0	F
CSbapl.78279	0.114286	0.764959	0.0537437	F
CSbapl.78278	0.0703125	24.6787	0.307033	F
CSbapl.60679	0.105882	2.67958	0.123242	F
CSbapl.66065	0.0855615	0.504588	0.038645	F
CSbapl.5057	0.141566	0	0	F
CSbapl.5055	0.0894309	0	0	F
CSbapl.6502	0.116883	0	0	F
CSbapl.42988	0.72751	0.264	0.0221625	F
CSbapl.27308	0.2	0.489128	0.037668	F
CSbapl.42984	0.142857	0	0	F
CSbapl.27306	0.753846	0.144714	0.0127854	F
CSbapl.27305	0.24	2.59927	0.121154	F
CSbapl.27304	0.650138	0.998298	0.0654897	F
CSbapl.27303	0.111111	0	0	F
CSbapl.27302	0.133333	4.01252	0.152486	F
CSbapl.42983	0.133333	0.341539	0.0277945	F
CSbapl.72157	0.142857	2.47906	0.117941	F
CSbapl.87445	0.259325	4.12595	0.154603	F
CSbapl.62958	0.0853081	1.38779	0.0823351	F
CSbapl.88613	0.0651163	0	0	F
CSbapl.88611	0.1	1.05799	0.0682741	F
CSbapl.88615	0.0661479	0.0830327	0.00754562	F
CSbapl.88619	0.0662983	0	0	F
CSbapl.31296	0.116667	0.0439478	0.00406861	F
CSbapl.51578	0.123711	0	0	F
CSbapl.8021	0.820831	1.79706	0.0973005	F
CSbapl.87998	0.0985915	0.24961	0.0210794	F
CSbapl.12476	0.492188	0	0	F
CSbapl.52125	0.0897436	1.06087	0.0684066	F
CSbapl.77225	0.345238	9.50352	0.222467	F
CSbapl.52128	0.125	10.192	0.228473	F
CSbapl.87994	0.0846154	0	0	F
CSbapl.77227	0.153846	0	0	F
CSbapl.62952	0.125	7.77525	0.205461	F
CSbapl.12696	0.114286	0	0	F
CSbapl.85597	0.131034	0	0	F
CSbapl.77238	0.115385	0	0	F
CSbapl.77234	0.0869565	0.1223	0.0109147	F
CSbapl.77235	0.121951	0.100629	0.00907023	F
CSbapl.41981	0.379487	3.08174	0.133054	F
CSbapl.41980	0.190476	0	0	F
CSbapl.41983	0.265795	0	0	F
CSbapl.85599	0.106383	0	0	F
CSbapl.65942	0.2	0.0936376	0.0084674	F
CSbapl.2084	0.8	1.69872	0.0939145	F
CSbapl.2086	0.153846	0	0	F
CSbapl.2080	0.142857	0	0	F
CSbapl.36955	0.761905	0.171262	0.0149542	F
CSbapl.31518	0.2	0.558104	0.0419513	F
CSbapl.31512	0.108108	0.785873	0.0548581	F
CSbapl.60323	0.0769231	19.7881	0.287046	F
CSbapl.2338	0.101266	0	0	F
CSbapl.2336	0.172414	0.127902	0.0113857	F
CSbapl.2334	0.142857	1.39736	0.0827132	F
CSbapl.2335	0.126582	0.0723571	0.00660853	F
CSbapl.2332	0.738426	16.7286	0.271986	F
CSbapl.2333	0.669627	14.0802	0.256681	F
CSbapl.55472	0.640741	23.5098	0.302626	F
CSbapl.43169	0.0950413	0	0	F
CSbapl.43164	0.854545	5.93507	0.183197	F
CSbapl.43167	0.125	1.32852	0.0799572	F
CSbapl.43166	0.186472	0	0	F
CSbapl.43160	0.0704225	0	0	F
CSbapl.100900	0.573018	0	0	F
CSbapl.43162	0.0769231	0.317887	0.0261118	F
CSbapl.37916	0.0595238	0.278755	0.0232604	F
CSbapl.37915	0.0659722	1.2854	0.0781891	F
CSbapl.37914	0.434211	0.161907	0.0141956	F
CSbapl.37913	0.137931	0.23099	0.0196592	F
CSbapl.37912	0.130435	0.208642	0.017926	F
CSbapl.37911	0.110266	0	0	F
CSbapl.37919	0.107595	0.407048	0.0323046	F
CSbapl.19732	0.166667	0.0436331	0.00404009	F
CSbapl.75268	0.130435	7.17901	0.198804	F
CSbapl.88601	0.894584	5.45802	0.176456	F
CSbapl.76544	0.119718	0	0	F
CSbapl.76543	0.28619	0.94822	0.0630889	F
CSbapl.66539	0.111111	0	0	F
CSbapl.43298	0.0901288	0	0	F
CSbapl.46660	0.808578	1.10119	0.0702393	F
CSbapl.46663	0.791983	7.63402	0.203926	F
CSbapl.46665	0.0802469	0.104762	0.00942479	F
CSbapl.19424	0.121622	0.747697	0.0528139	F
CSbapl.47131	0.207824	0.396167	0.0315702	F
CSbapl.14617	0.0849057	0.0878323	0.00796391	F
CSbapl.47137	0.165179	0.0853651	0.00774912	F
CSbapl.49860	0.0588235	0	0	F
CSbapl.66532	0.0775194	0.0449556	0.00415988	F
CSbapl.30649	0.352299	1.89451	0.10054	F
CSbapl.66536	0.535714	0.807673	0.0560058	F
CSbapl.3069	0.565217	0	0	F
CSbapl.66535	0.107143	0	0	F
CSbapl.66392	0.333333	0.345341	0.0280622	F
CSbapl.3064	0.0748899	0.216133	0.0185106	F
CSbapl.3067	0.115385	41.922	0.35563	F
CSbapl.3066	0.869919	4.13391	0.15475	F
CSbapl.3061	0.101852	0	0	F
CSbapl.69563	0.0925926	0	0	F
CSbapl.3063	0.0843373	0	0	F
CSbapl.22216	0.651741	4.27855	0.157378	F
CSbapl.75169	0.785013	0.114421	0.0102483	F
CSbapl.22211	0.111111	0	0	F
CSbapl.75164	0.768179	4.81514	0.166536	F
CSbapl.22218	0.841108	0.59358	0.044081	F
CSbapl.77733	0.166667	32.5481	0.332321	F
CSbapl.4538	0.121951	7.85641	0.206331	F
CSbapl.43839	0.0748299	0.0469331	0.00433873	F
CSbapl.48118	0.12844	11.5825	0.239551	F
CSbapl.48115	0.0990991	1.24293	0.0764148	F
CSbapl.28299	0.2	0	0	F
CSbapl.49243	0.0915033	0	0	F
CSbapl.49240	0.0909091	0	0	F
CSbapl.49241	0.641315	2.163	0.108931	F
CSbapl.49246	0.346189	0.122406	0.0109236	F
CSbapl.49247	0.105263	0.328531	0.0268728	F
CSbapl.49245	0.113043	137.3	0.466314	F
CSbapl.41475	0.136364	0	0	F
CSbapl.34552	0.172414	0.75867	0.053406	F
CSbapl.68898	0.114754	5.977	0.183768	F
CSbapl.41471	0.0793651	0.14897	0.0131365	F
CSbapl.65862	0.155172	0	0	F
CSbapl.65863	0.0992908	2.95537	0.130079	F
CSbapl.68890	0.1	8.77174	0.215635	F
CSbapl.65869	0.157895	0.0957434	0.00864938	F
CSbapl.68894	0.811372	18.7702	0.282297	F
CSbapl.68895	0.0980392	1.1381	0.0718867	F
CSbapl.96031	0.129771	0	0	F
CSbapl.96030	0.125	0.0938626	0.00848686	F
CSbapl.96033	0.125	0.112555	0.0100898	F
CSbapl.96032	0.0714286	0.623401	0.0458349	F
CSbapl.23248	0.285714	0	0	F
CSbapl.96036	0.111111	0.257542	0.021678	F
CSbapl.62487	0.826087	0	0	F
CSbapl.28290	0.0882353	0.878386	0.0596358	F
CSbapl.58975	0.117647	0	0	F
CSbapl.58970	0.2	0.296518	0.0245654	F
CSbapl.71094	0.265413	0	0	F
CSbapl.71095	0.2	0.249098	0.0210406	F
CSbapl.71097	0.333333	0.517976	0.0394831	F
CSbapl.71090	0.808612	7.65401	0.204145	F
CSbapl.71093	0.529412	0.0764474	0.00696867	F
CSbapl.68762	0.0912698	16.3027	0.269685	F
CSbapl.23163	0.2	0	0	F
CSbapl.68766	0.79182	205.009	0.50401	F
CSbapl.68767	0.859799	44.6116	0.361379	F
CSbapl.68768	0.115385	41.0472	0.353682	F
CSbapl.79662	0.129032	0.104069	0.00936542	F
CSbapl.23168	0.136364	0	0	F
CSbapl.39137	0.11	0.0414681	0.00384364	F
CSbapl.68130	0.273016	0	0	F
CSbapl.72678	0.0980392	0.357032	0.0288807	F
CSbapl.72671	0.0705882	0	0	F
CSbapl.72673	0.0900901	7.49407	0.20238	F
CSbapl.7037	0.106061	0.820927	0.0566969	F
CSbapl.72674	0.075	0	0	F
CSbapl.39132	0.221154	0	0	F
CSbapl.71322	0.11236	0	0	F
CSbapl.71320	0.166667	0.710152	0.0507596	F
CSbapl.71327	0.119048	0.127394	0.0113431	F
CSbapl.71325	0.0694444	0.285561	0.0237625	F
CSbapl.74787	0.129032	15.3582	0.264375	F
CSbapl.8810	0.274038	10.239	0.22887	F
CSbapl.8813	0.846061	4.8403	0.166945	F
CSbapl.74783	0.191033	0	0	F
CSbapl.8814	0.685474	50.8214	0.373454	F
CSbapl.8816	0.0722222	7.0789	0.197639	F
CSbapl.74789	0.494253	4.62895	0.163458	F
CSbapl.74788	0.784512	10.9817	0.234922	F
CSbapl.35421	0.166667	6.90154	0.195539	F
CSbapl.32433	0.0816327	0.316134	0.0259859	F
CSbapl.32432	0.153846	0.239775	0.0203319	F
CSbapl.32431	0.52	0.807957	0.0560207	F
CSbapl.35426	0.0625	0.389881	0.0311434	F
CSbapl.35428	0.0625	0	0	F
CSbapl.91569	0.0810811	11.8519	0.241555	F
CSbapl.32439	0.142857	0	0	F
CSbapl.97815	0.130435	0.0307591	0.00286589	F
CSbapl.36880	0.0952381	27.9548	0.318392	F
CSbapl.53259	0.107463	0.639156	0.0467485	F
CSbapl.73788	0.0705882	0	0	F
CSbapl.73789	0.148148	0.146182	0.0129066	F
CSbapl.35523	0.0632911	0	0	F
CSbapl.64099	0.108696	0	0	F
CSbapl.73782	0.0889831	0	0	F
CSbapl.64097	0.075	2.00208	0.103992	F
CSbapl.64094	0.166667	1.35095	0.0808641	F
CSbapl.64095	0.785714	3.94511	0.151205	F
CSbapl.64092	0.111111	60.9184	0.390294	F
CSbapl.73787	0.108108	0	0	F
CSbapl.64090	0.111111	0	0	F
CSbapl.64091	0.108108	0	0	F
CSbapl.95711	0.15625	0	0	F
CSbapl.95716	0.0697674	0.372071	0.0299234	F
CSbapl.24306	0.0747664	538.823	0.595138	F
CSbapl.24307	0.216981	0	0	F
CSbapl.24304	0.111111	8.2707	0.210656	F
CSbapl.24302	0.0925926	0.167308	0.0146343	F
CSbapl.24300	0.138889	30.4123	0.326098	F
CSbapl.73251	0.125	0.700102	0.050202	F
CSbapl.61572	0.103093	4.6719	0.164177	F
CSbapl.35283	0.117647	0	0	F
CSbapl.73257	0.104167	16.7492	0.272096	F
CSbapl.73258	0.0315186	0	0	F
CSbapl.73259	0.029877	0	0	F
CSbapl.35289	0.125	0	0	F
CSbapl.61578	0.819444	22.9318	0.300368	F
CSbapl.69383	0.166667	0	0	F
CSbapl.69385	0.0888889	0.627316	0.0460628	F
CSbapl.34489	0.0833333	0.378622	0.0303739	F
CSbapl.34480	0.0872483	2.36976	0.114922	F
CSbapl.28782	0.447205	0.447717	0.0350001	F
CSbapl.92172	0.121622	0	0	F
CSbapl.69965	0.176471	0.190975	0.0165331	F
CSbapl.69964	0.0254777	0	0	F
CSbapl.94041	0.166667	0	0	F
CSbapl.94047	0.0689655	0	0	F
CSbapl.69963	0.139194	0	0	F
CSbapl.69962	0.0598592	2.97884	0.130639	F
CSbapl.94049	0.0952381	0	0	F
CSbapl.69969	0.176471	0	0	F
CSbapl.65055	0.0772727	0.236216	0.02006	F
CSbapl.62006	0.685541	0.950992	0.0632234	F
CSbapl.65057	0.0843373	0	0	F
CSbapl.62003	0.832794	3.12434	0.134036	F
CSbapl.62002	0.814341	14.6346	0.260096	F
CSbapl.65053	0.2	0	0	F
CSbapl.60711	0.0909091	0.0855627	0.00776635	F
CSbapl.51001	0.105882	0	0	F
CSbapl.15202	0.104478	23.7375	0.3035	F
CSbapl.15201	0.771577	1.95556	0.102515	F
CSbapl.51002	0.07173	0	0	F
CSbapl.38102	0.0652174	0	0	F
CSbapl.15206	0.820606	2.04001	0.10518	F
CSbapl.12439	0.125	0	0	F
CSbapl.20534	0.129032	0	0	F
CSbapl.20536	0.0588235	0	0	F
CSbapl.26279	0.0900901	2.71415	0.124127	F
CSbapl.26272	0.134615	0.874367	0.0594331	F
CSbapl.66656	0.1	0	0	F
CSbapl.66652	0.0588235	0	0	F
CSbapl.22978	0.125	0.432917	0.034028	F
CSbapl.38107	0.105263	0	0	F
CSbapl.45749	0.117647	0.202183	0.0174191	F
CSbapl.45748	0.106383	0	0	F
CSbapl.93906	0.122449	1.95896	0.102624	F
CSbapl.93907	0.1	1.96644	0.102862	F
CSbapl.9980	0.692199	6.10117	0.185436	F
CSbapl.64878	0.0952381	0	0	F
CSbapl.14559	0.0671642	0.0909879	0.00823793	F
CSbapl.3925	0.117117	0.852061	0.0583006	F
CSbapl.64876	0.15	0	0	F
CSbapl.64877	0.2	0.31028	0.0255642	F
CSbapl.64872	0.0930233	0	0	F
CSbapl.50752	0.102041	6.8557	0.194989	F
CSbapl.97028	0.0833333	0	0	F
CSbapl.50750	0.100719	0.0731664	0.00667989	F
CSbapl.92058	0.0967742	3.67003	0.145791	F
CSbapl.50756	0.75641	6.41405	0.189515	F
CSbapl.50757	0.827711	19.5966	0.286171	F
CSbapl.50754	0.697329	0	0	F
CSbapl.50755	0.357143	0	0	F
CSbapl.58565	0.120907	0.047124	0.00435599	F
CSbapl.97020	0.166667	2.33637	0.113979	F
CSbapl.50758	0.75502	1.48537	0.086124	F
CSbapl.50759	0.869027	43.443	0.358924	F
CSbapl.97025	0.201258	5.80706	0.181435	F
CSbapl.97024	0.111111	1.23838	0.0762226	F
CSbapl.97027	0.0821429	0.0258187	0.0024114	F
CSbapl.58562	0.119048	0	0	F
CSbapl.5219	0.0769231	0	0	F
CSbapl.63068	0.142857	26.6584	0.314058	F
CSbapl.5214	0.627422	6.31857	0.188289	F
CSbapl.63067	0.08	27.8475	0.31804	F
CSbapl.5216	0.877828	13.2162	0.251099	F
CSbapl.64503	0.197764	0.285188	0.0237351	F
CSbapl.63062	0.0540541	0	0	F
CSbapl.5212	0.0963855	140.093	0.468205	F
CSbapl.47125	0.102564	0	0	F
CSbapl.6749	0.0338505	0	0	F
CSbapl.6748	0.0508475	0.15511	0.0136406	F
CSbapl.47127	0.105263	0	0	F
CSbapl.9742	0.1264	0	0	F
CSbapl.9743	0.0952381	0.0575777	0.00529569	F
CSbapl.9740	0.110236	0.169031	0.0147739	F
CSbapl.14625	0.166667	0.0528552	0.00487233	F
CSbapl.34944	0.0841121	0.0822646	0.0074785	F
CSbapl.9747	0.0714286	0.958126	0.0635686	F
CSbapl.9487	0.783582	0	0	F
CSbapl.58699	0.336735	1.02231	0.0666195	F
CSbapl.67521	0.166667	0.196487	0.0169699	F
CSbapl.50121	0.117021	24.0871	0.304828	F
CSbapl.58695	0.206009	0.21681	0.0185632	F
CSbapl.58694	0.331461	1.89246	0.100473	F
CSbapl.99358	0.107692	0.139957	0.0123915	F
CSbapl.13556	0.0738636	0.475878	0.0368226	F
CSbapl.18323	0.114504	0.0583801	0.00536745	F
CSbapl.1246	0.0888889	26.0638	0.312003	F
CSbapl.18321	0.0820896	5.13675	0.171629	F
CSbapl.1244	0.621035	13.9839	0.256075	F
CSbapl.18325	0.125	2.65524	0.122614	F
CSbapl.18324	0.137931	7.2035	0.199087	F
CSbapl.6299	0.0925926	5.38781	0.175422	F
CSbapl.1248	0.83815	16.289	0.269611	F
CSbapl.42216	0.0970874	2.37037	0.114939	F
CSbapl.42210	0.212121	0.178633	0.0155477	F
CSbapl.42211	0.37037	0	0	F
CSbapl.25498	0.0909091	0	0	F
CSbapl.82900	0.0565871	0	0	F
CSbapl.12893	0.0361446	0.00574968	0.00054235	F
CSbapl.12891	0.153846	0	0	F
CSbapl.96370	0.157895	0.469812	0.0364329	F
CSbapl.96376	0.125	0.946092	0.0629855	F
CSbapl.62820	0.348485	0.691724	0.0497347	F
CSbapl.56343	0.122449	63.2427	0.39378	F
CSbapl.56341	0.0909091	1.00336	0.0657291	F
CSbapl.76022	0.660927	0	0	F
CSbapl.17119	0.047619	0	0	F
CSbapl.54851	0.175439	0	0	F
CSbapl.76026	0.0941176	1.14506	0.0721943	F
CSbapl.54858	0.176471	0.0437917	0.00405446	F
CSbapl.9584	0.137931	2.16753	0.109067	F
CSbapl.60445	0.856787	1.46911	0.0855031	F
CSbapl.7164	0.236364	14.9987	0.262274	F
CSbapl.7165	0.115894	56.1797	0.382762	F
CSbapl.7167	0.830287	4.54146	0.161976	F
CSbapl.7161	0.687031	5.52775	0.177472	F
CSbapl.7162	0.0419162	3.31471	0.138305	F
CSbapl.7163	0.132653	1.4156	0.0834302	F
CSbapl.7168	0.781163	21.581	0.294872	F
CSbapl.7169	0.636166	0.760147	0.0534854	F
CSbapl.28360	0.0873016	0	0	F
CSbapl.28361	0.0892857	0	0	F
CSbapl.28364	0.142857	0.162513	0.014245	F
CSbapl.28365	0.679612	0.0339174	0.0031553	F
CSbapl.10668	0.10241	8.86449	0.216529	F
CSbapl.10669	0.0909091	2.07798	0.106354	F
CSbapl.99827	0.179104	0	0	F
CSbapl.99826	0.166667	0	0	F
CSbapl.2536	0.109756	0.958906	0.0636064	F
CSbapl.2530	0.112245	0.765365	0.0537654	F
CSbapl.39261	0.0469799	0	0	F
CSbapl.89818	0.125	0	0	F
CSbapl.16791	0.0833333	0	0	F
CSbapl.17073	0.167102	0.659898	0.0479381	F
CSbapl.89813	0.14121	0	0	F
CSbapl.89810	0.652332	0	0	F
CSbapl.89816	0.321429	0	0	F
CSbapl.89814	0.0769231	1.24362	0.0764436	F
CSbapl.17076	0.947368	1.46096	0.0851902	F
CSbapl.9587	0.126761	1.78628	0.0969351	F
CSbapl.84992	0.139535	1.191	0.0741988	F
CSbapl.46460	0.2	0.0917144	0.0083009	F
CSbapl.46466	0.190476	0.439437	0.0344575	F
CSbapl.46465	0.378378	0.718701	0.0512313	F
CSbapl.46464	0.0465116	0.325342	0.0266454	F
CSbapl.47335	0.0723684	0.189916	0.016449	F
CSbapl.47336	0.117647	0	0	F
CSbapl.47337	0.0650407	0	0	F
CSbapl.47331	0.114286	0	0	F
CSbapl.40100	0.861702	18.7789	0.282338	F
CSbapl.40101	0.812799	1.44754	0.0846732	F
CSbapl.86460	0.560062	0.203194	0.0174987	F
CSbapl.47339	0.070922	0	0	F
CSbapl.40109	0.0891089	0	0	F
CSbapl.90025	0.34093	4.45436	0.160477	F
CSbapl.90026	0.534521	0.0993136	0.0089571	F
CSbapl.44825	0.07	7.8953	0.206746	F
CSbapl.44827	0.135135	1.5041	0.0868341	F
CSbapl.44826	0.0259235	0	0	F
CSbapl.44828	0.170213	0	0	F
CSbapl.90028	0.0809249	5.93788	0.183236	F
CSbapl.98428	0.097561	0.208412	0.017908	F
CSbapl.3660	0.0934579	0	0	F
CSbapl.3667	0.0844156	1.72738	0.0949141	F
CSbapl.61039	0.835982	5.90053	0.182725	F
CSbapl.61037	0.134328	5.79843	0.181315	F
CSbapl.13315	0.12	0.502115	0.0384895	F
CSbapl.61034	0.116279	0.305836	0.0252428	F
CSbapl.13313	0.102564	0	0	F
CSbapl.61032	0.0725806	5.80699	0.181434	F
CSbapl.61030	0.103448	40.9336	0.353426	F
CSbapl.11224	0.2	0	0	F
CSbapl.11220	0.1	0	0	F
CSbapl.11229	0.166667	0.0878358	0.00796422	F
CSbapl.11228	0.075	0.159101	0.0139669	F
CSbapl.82297	0.0988372	0	0	F
CSbapl.27918	0.148148	0	0	F
CSbapl.22104	0.0943396	0	0	F
CSbapl.27913	0.0810811	0	0	F
CSbapl.27910	0.125541	1.41228	0.0833004	F
CSbapl.22105	0.0625	0	0	F
CSbapl.27916	0.142857	0	0	F
CSbapl.25200	0.552381	6.38452	0.189138	F
CSbapl.41274	0.0965909	6.33091	0.188449	F
CSbapl.41273	0.247892	0	0	F
CSbapl.76173	0.0482315	0	0	F
CSbapl.82128	0.2	0	0	F
CSbapl.76171	0.103774	0.104069	0.00936542	F
CSbapl.25208	0.230978	3.33079	0.138657	F
CSbapl.25209	0.124138	0	0	F
CSbapl.82122	0.148649	0.0803967	0.0073151	F
CSbapl.82123	0.133333	0	0	F
CSbapl.82120	0.0615385	29.3917	0.322973	F
CSbapl.86639	0.106383	0	0	F
CSbapl.86636	0.0693431	0	0	F
CSbapl.86637	0.0693431	0	0	F
CSbapl.93594	0.2	0	0	F
CSbapl.93592	0.823529	3.45944	0.141426	F
CSbapl.93599	0.0625	1.06657	0.0686676	F
CSbapl.82847	0.648402	0	0	F
CSbapl.11899	0.808057	5.63178	0.178967	F
CSbapl.68562	0.0714286	1.28067	0.0779932	F
CSbapl.68567	0.105263	0	0	F
CSbapl.68568	0.0821918	0	0	F
CSbapl.44178	0.0983607	11.3204	0.237559	F
CSbapl.45888	0.0989011	53.9012	0.378915	F
CSbapl.45889	0.10989	0.13193	0.011723	F
CSbapl.45883	0.820513	0.425217	0.0335183	F
CSbapl.45884	0.745257	9.58269	0.223177	F
CSbapl.45887	0.591011	18.9147	0.282986	F
CSbapl.93043	0.235294	3.2643	0.137193	F
CSbapl.93042	0.0825688	0.089246	0.00808678	F
CSbapl.93040	0.1	0.0624024	0.00572627	F
CSbapl.93047	0.0759494	0.274608	0.0229531	F
CSbapl.93046	0.135802	102.169	0.438591	F
CSbapl.55937	0.091954	0	0	F
CSbapl.55936	0.10219	2.54627	0.119751	F
CSbapl.55933	0.166667	0	0	F
CSbapl.5153	1	0.123138	0.0109853	F
CSbapl.36168	0.815545	8.58122	0.213773	F
CSbapl.37055	0.0945946	0	0	F
CSbapl.70435	0.0877193	0	0	F
CSbapl.54085	0.0833333	0	0	F
CSbapl.70439	0.0947368	0	0	F
CSbapl.54088	0.136364	0.913561	0.0613908	F
CSbapl.83653	0.129412	101.654	0.438118	F
CSbapl.83652	0.0666667	0.590618	0.043905	F
CSbapl.47565	0.0735294	0	0	F
CSbapl.100361	0.741222	1.35949	0.0812073	F
CSbapl.100366	0.0381679	0.153717	0.0135264	F
CSbapl.73051	0.0471014	0.00587359	0.000554004	F
CSbapl.45228	0.755556	15.2797	0.263921	F
CSbapl.45225	0.470006	2.90576	0.128885	F
CSbapl.45220	0.105263	1.38441	0.0822009	F
CSbapl.45222	0.160377	0	0	F
CSbapl.45223	0.719008	157.33	0.479108	F
CSbapl.53196	0.0872093	0	0	F
CSbapl.53191	0.0863636	0	0	F
CSbapl.53193	0.0952381	0	0	F
CSbapl.53198	0.09	0	0	F
CSbapl.93237	0.764402	0.470561	0.0364811	F
CSbapl.92314	0.0960452	0	0	F
CSbapl.92315	0.10101	5.25216	0.173391	F
CSbapl.84568	0.133333	5.22729	0.173014	F
CSbapl.84561	0.139535	2.14308	0.108334	F
CSbapl.84564	0.0789474	0	0	F
CSbapl.84566	0.118644	0	0	F
CSbapl.84567	0.208861	0	0	F
CSbapl.53441	0.697368	1.7135	0.0944314	F
CSbapl.53447	0.62069	0	0	F
CSbapl.53448	0.0882353	0.5128	0.03916	F
CSbapl.57572	0.133333	0	0	F
CSbapl.57571	0.125	0	0	F
CSbapl.57577	0.16129	0	0	F
CSbapl.57574	0.117647	0	0	F
CSbapl.57578	0.142857	1.455	0.0849609	F
CSbapl.92	0.124031	0.908	0.0611155	F
CSbapl.91	0.180108	45.696	0.363602	F
CSbapl.84388	0.109589	0.477871	0.0369502	F
CSbapl.84384	0.116883	0.28549	0.0237573	F
CSbapl.76999	0.142857	0.138767	0.0122926	F
CSbapl.73310	0.108696	2.83772	0.127223	F
CSbapl.31945	0.117647	0.0681239	0.00623435	F
CSbapl.73315	0.0656934	1.52287	0.0875408	F
CSbapl.73317	0.619048	1.71727	0.0945627	F
CSbapl.52718	0.172414	0	0	F
CSbapl.52714	0.69697	1.86544	0.0995854	F
CSbapl.52715	0.2	0	0	F
CSbapl.52716	0.0681818	3.47403	0.141735	F
CSbapl.52717	0.0833333	6.4214	0.189609	F
CSbapl.52710	0.195795	0	0	F
CSbapl.52711	0.363388	11.3685	0.237929	F
CSbapl.68886	0.0451613	0	0	F
CSbapl.56624	0.285714	0.189556	0.0164203	F
CSbapl.41404	0.703276	8.65342	0.214483	F
CSbapl.15049	0.692722	0.35309	0.0286056	F
CSbapl.46149	0.119658	0.350555	0.0284281	F
CSbapl.43317	0.0879121	0.0434142	0.00402025	F
CSbapl.46147	0.134715	28.0558	0.318721	F
CSbapl.43312	0.78854	5.52607	0.177447	F
CSbapl.46141	0.158192	3.93488	0.151009	F
CSbapl.15043	0.862043	19.3319	0.284947	F
CSbapl.43311	0.611111	7.34041	0.200653	F
CSbapl.10277	0.112676	0	0	F
CSbapl.85383	0.488889	21.4494	0.294319	F
CSbapl.85382	0.0802469	0.181976	0.0158156	F
CSbapl.31494	1	0.870729	0.0592493	F
CSbapl.31493	0.125	0.149704	0.0131969	F
CSbapl.2278	0.155689	0.0428519	0.00396925	F
CSbapl.74840	0.4125	0.142351	0.0125899	F
CSbapl.2273	0.852855	63.3752	0.393975	F
CSbapl.2272	0.103448	0	0	F
CSbapl.2270	0.0857143	31.3499	0.32888	F
CSbapl.2275	0.128205	0	0	F
CSbapl.10015	0.111111	0	0	F
CSbapl.19217	0.0754717	0.219771	0.0187931	F
CSbapl.19212	0.148148	0	0	F
CSbapl.99750	0.06	0	0	F
CSbapl.19218	0.102041	11.9086	0.241971	F
CSbapl.19219	0.133333	4.61033	0.163145	F
CSbapl.37898	0.138554	5.55514	0.177868	F
CSbapl.37899	0.0813953	2.64354	0.122311	F
CSbapl.37892	0.0877193	0.183793	0.0159609	F
CSbapl.37893	0.133333	19.8336	0.287253	F
CSbapl.37890	0.659436	2.0275	0.10479	F
CSbapl.37891	0.0821918	194.981	0.499289	F
CSbapl.37895	0.720766	4.31259	0.157986	F
CSbapl.43213	0.0511364	0.116111	0.0103916	F
CSbapl.15161	0.875803	42.9395	0.357846	F
CSbapl.10994	0.79768	0.988758	0.0650371	F
CSbapl.73863	0.1	0	0	F
CSbapl.73862	0.125	0.035423	0.00329296	F
CSbapl.21975	0.166667	0.637079	0.0466286	F
CSbapl.48099	0.0519481	0	0	F
CSbapl.85395	0.280702	4.75804	0.165603	F
CSbapl.48097	0.1	1.02779	0.0668756	F
CSbapl.48090	0.0508475	0.0841965	0.00764722	F
CSbapl.21978	0.148148	4.62499	0.163391	F
CSbapl.37762	0.08	0	0	F
CSbapl.37766	0.119565	0.927235	0.0620644	F
CSbapl.10999	0.0674157	0.0231278	0.00216293	F
CSbapl.37768	0.16	0	0	F
CSbapl.14797	0.253112	0	0	F
CSbapl.14794	0.679274	3.92452	0.150811	F
CSbapl.40663	0.102703	0.162183	0.0142181	F
CSbapl.15168	0.0833333	0.335397	0.0273605	F
CSbapl.97224	0.0978261	0.0394238	0.00365777	F
CSbapl.471	0.812227	0.158633	0.0139286	F
CSbapl.472	0.55303	0.987275	0.0649665	F
CSbapl.478	0.0827068	4.77218	0.165835	F
CSbapl.59901	0.164286	8.20657	0.21	F
CSbapl.59902	0.0921053	0.411946	0.0326334	F
CSbapl.59903	0.868421	0.184554	0.0160217	F
CSbapl.48326	0.0764331	0.0239291	0.00223698	F
CSbapl.59905	0.844329	2.129	0.107909	F
CSbapl.59906	0.0886076	0.375609	0.0301669	F
CSbapl.97591	0.2	0	0	F
CSbapl.75082	0.0903955	2.95226	0.130005	F
CSbapl.97593	0.0909091	12.8612	0.248707	F
CSbapl.97592	0.119048	2.94639	0.129864	F
CSbapl.75087	0.181818	0.38779	0.0310009	F
CSbapl.66306	0.883333	1.71967	0.0946462	F
CSbapl.75085	0.136364	0.938209	0.0626016	F
CSbapl.97596	0.413815	0.359635	0.029062	F
CSbapl.75088	0.2	0	0	F
CSbapl.3745	0.0816327	9.86658	0.225682	F
CSbapl.72739	0.112069	0	0	F
CSbapl.72734	0.825967	1.71388	0.0944447	F
CSbapl.72735	0.765991	6.83237	0.194708	F
CSbapl.9230	0.177778	0.0390115	0.00362024	F
CSbapl.9231	0.105691	1.15879	0.0727977	F
CSbapl.72731	0.0902778	9.38283	0.221374	F
CSbapl.9235	0.461538	0.979706	0.0646055	F
CSbapl.22407	0.166667	1.19349	0.0743062	F
CSbapl.22406	0.0846154	0	0	F
CSbapl.22402	0.104	0.442461	0.034656	F
CSbapl.65744	0.104167	27.785	0.317835	F
CSbapl.75331	0.12	0	0	F
CSbapl.75334	0.1	0	0	F
CSbapl.22408	0.128205	0.0663536	0.00607745	F
CSbapl.71421	0.131579	0.17073	0.0149112	F
CSbapl.71420	0.0897436	0.401741	0.0319471	F
CSbapl.71422	0.0927835	0.806885	0.0559646	F
CSbapl.71424	0.142857	0	0	F
CSbapl.65740	0.142857	0.21803	0.018658	F
CSbapl.96175	0.142857	0	0	F
CSbapl.65742	0.108696	0.0925239	0.00837102	F
CSbapl.96178	0.0816327	29.9351	0.32465	F
[truncated: 29,949 more rows]

## Sheet: M_TSSK2k_5mC_vs_gene_express
Gene	M_5mC_level	expr_count	exop_ration	sample
CSbapl.11333	0.977528	0.103673	0.0103756	M	expr_count：fpkm
CSbapl.11337	0.586207	0.381567	0.0339972	M	expr_ratio：log10(fpkm+1)/max（log10(fpkm+1)）
CSbapl.11336	1	5.19387	0.191808	M
CSbapl.11334	0.590909	1.1278	0.0794225	M
CSbapl.95455	0.863454	1.41542	0.0927585	M
CSbapl.95453	0.129412	33.4601	0.372328	M
CSbapl.95450	0.0733333	0.143722	0.0141248	M
CSbapl.64448	0.980769	0.364774	0.0327108	M
CSbapl.24060	0.0788382	0.366107	0.0328135	M
CSbapl.24066	0.0833333	0	0	M
CSbapl.24065	0.282953	3.33145	0.154188	M
CSbapl.64442	0.182561	0	0	M
CSbapl.11211	0.136364	0.13035	0.0128879	M
CSbapl.67181	0.0882353	0.0431628	0.00444475	M
CSbapl.67180	0.2	0.305925	0.0280747	M
CSbapl.20766	0.129032	0	0	M
CSbapl.67182	0.261029	0.130316	0.0128847	M
CSbapl.67185	0.0479705	0.160973	0.0156995	M
CSbapl.67184	0.357143	1.19805	0.0828392	M
CSbapl.20762	0.0769231	0	0	M
CSbapl.63870	0.114286	0.103105	0.0103215	M
CSbapl.63874	0.175355	0.376792	0.033633	M
CSbapl.63878	0.166667	0	0	M
CSbapl.62694	0.4	0.0459251	0.00472292	M
CSbapl.62695	0.333333	0	0	M
CSbapl.62692	0.2	0	0	M
CSbapl.55018	0.144444	0.536804	0.0451978	M
CSbapl.62690	0.0909091	0	0	M
CSbapl.62691	0.142857	0.112541	0.0112174	M
CSbapl.44200	0.142857	0.0926902	0.00932373	M
CSbapl.44203	0.142857	0	0	M
CSbapl.55019	0.0746269	0	0	M
CSbapl.18434	0.143345	0	0	M
CSbapl.38639	0.1	0.272999	0.0253887	M
CSbapl.53604	0.446097	0.412039	0.0362919	M
CSbapl.18730	0.0904523	0.032327	0.00334645	M
CSbapl.38631	0.166667	0	0	M
CSbapl.38637	0.105263	0.0759665	0.00770144	M
CSbapl.8231	0.0819672	2.18613	0.121887	M
CSbapl.69808	0.0849057	0.25174	0.0236173	M
CSbapl.93114	0.129032	0	0	M
CSbapl.93117	0.0896552	0.0652614	0.00664971	M
CSbapl.93116	0.0791367	1.93663	0.11331	M
CSbapl.69800	0.0888889	0	0	M
CSbapl.69801	0.102564	20.8917	0.324607	M
CSbapl.69807	0.121212	0	0	M
CSbapl.69805	0.142857	0	0	M
CSbapl.65319	0.827184	3.59217	0.160336	M
CSbapl.65313	0.0808824	1.26952	0.0862046	M
CSbapl.65315	0.10101	0	0	M
CSbapl.63251	0.142857	0	0	M
CSbapl.63259	0.723404	4.62068	0.181594	M
CSbapl.15360	0.708039	7.62358	0.226617	M
CSbapl.15361	0.12963	0.705161	0.056132	M
CSbapl.15363	0.2	4.33838	0.176174	M
CSbapl.16949	0.0634146	0	0	M
CSbapl.16948	0.0909091	0.0297553	0.0030841	M
CSbapl.16945	0.406977	0.0833602	0.00842176	M
CSbapl.16947	0.303571	0	0	M
CSbapl.27449	0.0716332	0	0	M
CSbapl.8139	0.77	1.17983	0.0819635	M
CSbapl.26335	0.0901288	0.0653903	0.00666244	M
CSbapl.45153	0.917293	11.5861	0.266387	M
CSbapl.66759	0.515152	1.04749	0.0753758	M
CSbapl.45151	0.0930233	0.0700012	0.00711667	M
CSbapl.45157	0.111111	17.0583	0.304359	M
CSbapl.66753	0.223881	0	0	M
CSbapl.45158	0.483871	1.04223	0.0751054	M
CSbapl.27440	0.116505	0.103155	0.0103263	M
CSbapl.92242	0.0803213	0	0	M
CSbapl.92241	0.0948276	0	0	M
CSbapl.22651	0.107143	1.62964	0.101696	M
CSbapl.99011	0.0945946	0.0381825	0.00394138	M
CSbapl.99015	0.0834646	0.255218	0.0239091	M
CSbapl.99018	0.0925926	1.18598	0.0822603	M
CSbapl.99019	0.115385	0.461028	0.0398792	M
CSbapl.13403	0.0849673	23.3503	0.335802	M
CSbapl.13402	0.583333	12.1724	0.271176	M
CSbapl.13401	0.739384	14.1244	0.28571	M
CSbapl.50654	0.0867347	0	0	M
CSbapl.13407	0.0961538	0	0	M
CSbapl.57604	0.105263	0.0976007	0.00979536	M
CSbapl.97148	0.117647	0	0	M
CSbapl.97147	0.0625	0	0	M
CSbapl.13409	0.117117	0.0301662	0.00312607	M
CSbapl.13408	0.109589	0.0566999	0.00580093	M
CSbapl.97143	0.753728	2.88183	0.142661	M
CSbapl.50659	0.2	0	0	M
CSbapl.50658	0.153846	0	0	M
CSbapl.58407	0.0731707	0	0	M
CSbapl.5559	0.492126	1.25814	0.085676	M
CSbapl.58405	0.0862069	0.117	0.0116381	M
CSbapl.5556	0.279352	4.40872	0.177551	M
CSbapl.58408	0.0880503	0	0	M
CSbapl.5552	0.2	0.067858	0.00690579	M
CSbapl.5550	0.0849057	0.0996079	0.00998753	M
CSbapl.9669	0.048	0	0	M
CSbapl.22055	0.795869	19.4678	0.317533	M
CSbapl.50387	0.0599369	0	0	M
CSbapl.50386	0.1	0.0652614	0.00664971	M
CSbapl.22050	0.848144	6.58496	0.213119	M
CSbapl.22052	0.133333	0.505171	0.0430101	M
CSbapl.67404	0.108333	0.131636	0.0130074	M
CSbapl.67405	0.0757098	0.903118	0.0676848	M
CSbapl.7953	0.674603	0.230196	0.0217912	M
CSbapl.7952	0.121495	1.16615	0.0813014	M
CSbapl.7955	0.162338	62.4388	0.436518	M
CSbapl.67187	0.155556	6.35103	0.209824	M
CSbapl.7956	0.132653	2.30395	0.125707	M
CSbapl.7958	0.821721	5.52985	0.197364	M
CSbapl.67408	0.101266	0.160388	0.0156465	M
CSbapl.23901	0.373737	132.641	0.514888	M
CSbapl.23902	0.82706	10.0667	0.252854	M
CSbapl.23907	0.101852	16.5961	0.301632	M
CSbapl.6393	0.0577778	0.359194	0.0322799	M
CSbapl.6394	0.868375	8.40179	0.235705	M
CSbapl.6396	0.558357	0.180158	0.0174235	M
CSbapl.6397	0.142857	0.0243267	0.00252813	M
CSbapl.18208	0.130435	0	0	M
CSbapl.6399	0.142857	0.667783	0.0538007	M
CSbapl.92938	0.753333	15.1716	0.292752	M
CSbapl.92939	0.748936	0.570842	0.047502	M
CSbapl.42311	0.117647	5.32513	0.194014	M
CSbapl.92935	0.0982659	34.0241	0.374036	M
CSbapl.42313	0.0915493	2.3047	0.12573	M
CSbapl.92937	0.773256	20.9861	0.325059	M
CSbapl.92930	0.117647	0.153088	0.0149827	M
CSbapl.92932	0.157895	0.0814473	0.00823588	M
CSbapl.92933	0.106625	0.265621	0.0247773	M
CSbapl.30732	0.208738	7.62383	0.22662	M
CSbapl.12758	0.0841121	2.35582	0.127345	M
CSbapl.12754	0.0533708	0.0710625	0.00722095	M
CSbapl.12752	0.0726644	0	0	M
CSbapl.12753	0.04811	0	0	M
CSbapl.56552	0.782566	4.58979	0.181014	M
CSbapl.56553	0.0994152	0.0432137	0.00444988	M
CSbapl.56550	0.0974026	0.20475	0.0195927	M
CSbapl.56556	0.0763889	0.131403	0.0129858	M
CSbapl.56554	0.712121	4.41601	0.177692	M
CSbapl.96230	0.0827586	0.0379173	0.00391451	M
CSbapl.98050	0.142857	0	0	M
CSbapl.98055	0.0721649	0.0325197	0.00336609	M
CSbapl.35787	0.428571	0.0939456	0.00944451	M
CSbapl.100756	0.269231	0.251638	0.0236087	M
CSbapl.88014	0.2	0	0	M
CSbapl.84958	0.102273	1009.73	0.727702	M
CSbapl.98525	0.0923077	0	0	M
CSbapl.86666	0.365317	0.293282	0.0270513	M
CSbapl.10453	0.0785714	0	0	M
CSbapl.10452	0.0757576	0	0	M
CSbapl.91297	0.0983607	0.263249	0.02458	M
CSbapl.7044	0.132075	19.8611	0.319535	M
CSbapl.98522	0.15	0.137775	0.0135765	M
CSbapl.99908	0.742804	1.01782	0.0738405	M
CSbapl.99909	0.0790191	0.0524625	0.0053783	M
CSbapl.2678	0.106383	0.060622	0.00619062	M
CSbapl.2677	0.571429	0.19441	0.0186861	M
CSbapl.99905	0.07	0	0	M
CSbapl.2675	0.0818182	2.13326	0.120127	M
CSbapl.99900	0.835813	0.199759	0.0191561	M
CSbapl.37417	0.0833333	0.0991569	0.00994439	M
CSbapl.37415	0.0397614	0.0357297	0.00369259	M
CSbapl.37411	0.120879	0.0436807	0.00449697	M
CSbapl.80485	0.0792079	0.782466	0.0607957	M
CSbapl.37418	0.163575	12.6032	0.274561	M
CSbapl.4635	0.142857	6.73865	0.215229	M
CSbapl.47557	0.0684411	0.0638181	0.0065071	M
CSbapl.80736	0.354785	0.306468	0.0281183	M
CSbapl.40262	0.0992366	4.08489	0.171057	M
CSbapl.40261	0.832749	120.334	0.504727	M
CSbapl.40260	0.1	0.762574	0.0596152	M
CSbapl.81283	0.0923077	6.02454	0.205045	M
CSbapl.81280	0.843628	4.06694	0.170685	M
CSbapl.44945	0.193798	0	0	M
CSbapl.81287	0.868759	12.387	0.272875	M
CSbapl.44940	0.227273	0	0	M
CSbapl.44941	0.153846	0	0	M
CSbapl.90300	0.0789474	0	0	M
CSbapl.90302	0.116592	0.231872	0.0219343	M
CSbapl.44948	0.85019	1.19516	0.0827008	M
CSbapl.44949	0.209677	0.618825	0.0506668	M
CSbapl.4099	0.0798319	0	0	M
CSbapl.4098	0.111111	0	0	M
CSbapl.4097	0.117021	0	0	M
CSbapl.4096	0.117647	0.120672	0.0119834	M
CSbapl.4093	0.113043	0.0802718	0.00812148	M
CSbapl.76741	0.776301	0.385474	0.0342942	M
CSbapl.55145	0.733333	1.14803	0.0804182	M
CSbapl.82394	0.0987654	0.169744	0.0164911	M
CSbapl.5943	0.0973154	1.57741	0.0995858	M
CSbapl.5945	0.153846	0.798241	0.0617225	M
CSbapl.86881	0.0816327	0	0	M
CSbapl.27819	0.097561	0	0	M
CSbapl.27817	0.832415	0.427754	0.037456	M
CSbapl.27816	0.772277	18.3713	0.311741	M
CSbapl.27815	0.722377	0.115875	0.0115322	M
CSbapl.86889	0.0894309	0	0	M
CSbapl.27810	0.843234	0.274667	0.0255264	M
CSbapl.41135	0.2	2.42184	0.129394	M
CSbapl.41136	0.814208	15.2712	0.293398	M
CSbapl.41139	0.702206	0.132811	0.0131165	M
CSbapl.86776	0.337209	0	0	M
CSbapl.86774	0.821622	0	0	M
CSbapl.19243	0.416667	1.59394	0.100258	M
CSbapl.68201	0.0674157	0.0882753	0.00889788	M
CSbapl.79184	0.829694	2.25384	0.124099	M
CSbapl.79181	0.825519	0	0	M
CSbapl.35060	0.046875	0.205472	0.0196557	M
CSbapl.38090	0.874459	1.37467	0.0909686	M
CSbapl.93113	0.12069	0.0416653	0.00429365	M
CSbapl.33888	0.835938	36.5691	0.381414	M
CSbapl.33883	0.12844	0.304998	0.0279999	M
CSbapl.33882	0.166667	0	0	M
CSbapl.33885	0.107226	0.133004	0.0131345	M
CSbapl.59542	0.343109	4.02278	0.169764	M
CSbapl.33886	0.504805	2.10273	0.119097	M
CSbapl.70377	0.102941	0.442903	0.0385662	M
CSbapl.94321	0.0584795	0	0	M
CSbapl.70371	0.1	11.5329	0.265941	M
CSbapl.94320	0.0798611	0.119173	0.0118426	M
CSbapl.70378	0.247134	0.539105	0.0453552	M
CSbapl.78580	0.219792	0	0	M
CSbapl.78583	0.152174	0.129081	0.0127697	M
CSbapl.78585	0.654971	37.1297	0.382972	M
CSbapl.78584	0.0722022	0.104689	0.0104725	M
CSbapl.78589	0.134146	3.4006	0.155854	M
CSbapl.19593	0.0769231	66.5231	0.443081	M
CSbapl.53258	0.0487805	0	0	M
CSbapl.88035	0.0722892	0	0	M
CSbapl.88032	0.0571429	0	0	M
CSbapl.88030	0.116279	0.336776	0.0305306	M
CSbapl.88031	0.0666667	0.0197115	0.00205315	M
CSbapl.53253	0.0707071	0.0200017	0.00208308	M
CSbapl.53250	0.0860215	3.98318	0.168932	M
CSbapl.53251	0.43956	0	0	M
CSbapl.53256	0.137931	0.215648	0.0205399	M
CSbapl.60763	0.0862069	0	0	M
CSbapl.85675	0.0897436	0.612734	0.0502703	M
CSbapl.85674	0.0882353	0.0404451	0.00417037	M
CSbapl.87910	0.109756	0.425501	0.0372899	M
CSbapl.87913	0.142857	0.0747958	0.00758694	M
CSbapl.87917	0.102564	0	0	M
CSbapl.87918	0.1	0	0	M
CSbapl.97739	0.181818	0.121048	0.0120186	M
CSbapl.3973	0.07	12.3738	0.272771	M
CSbapl.88699	0.115702	7.51422	0.225275	M
CSbapl.32820	0.176471	0	0	M
CSbapl.32824	0.112245	0	0	M
CSbapl.32825	0.125	0	0	M
CSbapl.32829	0.0862069	0.0687993	0.00699846	M
CSbapl.89344	0.0869565	0.790264	0.0612549	M
CSbapl.89342	0.0810811	2.85914	0.142044	M
CSbapl.89340	0.101124	0	0	M
CSbapl.88963	0.114286	0	0	M
CSbapl.73053	0.138889	0	0	M
CSbapl.88966	0.0740741	0.0787187	0.00797015	M
CSbapl.73051	0.04375	0.0163414	0.00170495	M
CSbapl.5951	0.376344	3.71595	0.163134	M
CSbapl.85518	0.841584	2.99263	0.145621	M
CSbapl.85513	0.118644	0.212931	0.0203045	M
CSbapl.41904	0.146341	0.695962	0.0555631	M
CSbapl.41907	0.857143	8.8522	0.240627	M
CSbapl.41901	0.0816327	6.1362	0.206704	M
CSbapl.41900	0.0752688	0.818335	0.0628913	M
CSbapl.41903	0.844575	3.55156	0.159402	M
CSbapl.15364	0.142857	0.243669	0.0229369	M
CSbapl.70402	0.142857	0.109088	0.0108904	M
CSbapl.51123	0.0634921	1.0282	0.07438	M
CSbapl.10359	0.109375	0.0759881	0.00770356	M
CSbapl.15162	0.693587	2.86077	0.142088	M
CSbapl.43210	0.105263	1.88926	0.111599	M
CSbapl.15167	0.0902256	0.0840093	0.00848476	M
CSbapl.43215	0.0576497	0.0323999	0.00335389	M
CSbapl.43214	0.133803	0.199216	0.0191084	M
CSbapl.15168	0.0877193	0.536537	0.0451795	M
CSbapl.79977	0.763889	2.56983	0.133848	M
CSbapl.79976	0.75	1.19755	0.0828151	M
CSbapl.79975	0.814318	0.323937	0.0295154	M
CSbapl.79974	0.831325	3.50224	0.158256	M
CSbapl.79970	0.166667	2.61826	0.135265	M
CSbapl.19310	0.0920245	0.177638	0.0171986	M
CSbapl.19315	0.125	0.860739	0.065316	M
CSbapl.19317	0.133333	0.638654	0.0519474	M
CSbapl.37997	0.802791	6.71585	0.214918	M
CSbapl.37996	0.109756	0.030262	0.00313584	M
CSbapl.37995	0.1	0	0	M
CSbapl.37994	0.0983607	3.69941	0.162764	M
CSbapl.37991	0.0877193	0	0	M
CSbapl.78677	0.0757576	49.5536	0.412637	M
CSbapl.73944	0.104167	0	0	M
CSbapl.73946	0.142857	0.357061	0.0321147	M
CSbapl.73948	0.0304976	3.04193	0.146912	M
CSbapl.242	0.0757576	11.1851	0.26298	M
CSbapl.98709	0.0945946	0.949795	0.0702334	M
CSbapl.247	0.154135	0	0	M
CSbapl.246	0.148936	0	0	M
CSbapl.244	0.142857	0.250492	0.0235124	M
CSbapl.72098	0.103448	0.0857732	0.00865578	M
CSbapl.40742	0.2	0	0	M
CSbapl.97308	0.075	0	0	M
CSbapl.14690	0.148148	0	0	M
CSbapl.14696	0.0818182	0.0566999	0.00580093	M
CSbapl.97301	0.175	0.027449	0.00284826	M
CSbapl.14699	0.1	0	0	M
CSbapl.6197	0.153846	0.276982	0.0257172	M
CSbapl.97307	0.0921986	0	0	M
CSbapl.95236	0.166667	0	0	M
CSbapl.95234	0.0909091	0	0	M
CSbapl.95232	0.272727	0	0	M
CSbapl.95233	0.0909091	0	0	M
CSbapl.95239	0.740325	21.4711	0.327354	M
CSbapl.64229	0.120482	0.315192	0.0288184	M
CSbapl.9062	0.248307	0.110269	0.0110024	M
CSbapl.9061	0.190909	6.03381	0.205184	M
CSbapl.101091	0.735	0.203457	0.0194798	M
CSbapl.9064	0.0892857	0	0	M
CSbapl.14340	0.0742574	0	0	M
CSbapl.14343	0.0918367	1.4566	0.0945363	M
CSbapl.64222	0.108696	30.8636	0.364088	M
CSbapl.64225	0.142857	3.59067	0.160302	M
CSbapl.64224	0.122581	0	0	M
CSbapl.14347	0.111111	0	0	M
CSbapl.22291	0.1875	1.37046	0.090782	M
CSbapl.60148	0.643443	2.39838	0.128671	M
CSbapl.79537	0.135135	1.0684	0.0764447	M
CSbapl.18447	0.181818	0.127086	0.0125836	M
CSbapl.18449	0.0568182	0.479156	0.0411763	M
CSbapl.75476	0.111111	0	0	M
CSbapl.75472	0.0862069	3.35031	0.154645	M
CSbapl.71549	0.092437	0.283641	0.0262643	M
CSbapl.71545	0.0734463	0.125465	0.0124323	M
CSbapl.71543	0.125	0	0	M
CSbapl.71540	0.147059	0.0853139	0.00861128	M
CSbapl.36118	0.110092	0.456167	0.0395287	M
CSbapl.36112	0.2	5.8142	0.201848	M
CSbapl.36113	0.15	0.132366	0.0130752	M
CSbapl.36114	0.0652174	0	0	M
CSbapl.98218	0.731207	3.58184	0.160099	M
CSbapl.24924	0.0523918	0	0	M
CSbapl.98212	0.198225	0.748856	0.0587934	M
CSbapl.24928	0.0823529	0	0	M
CSbapl.98217	0.15	0.0910015	0.00916105	M
CSbapl.98216	0.0928962	0	0	M
CSbapl.98215	0.696035	0.132552	0.0130925	M
CSbapl.98214	0.0689655	9.85073	0.250781	M
CSbapl.65577	0.0895522	0	0	M
CSbapl.33694	0.166667	0.0376558	0.00388801	M
CSbapl.33697	0.1	0	0	M
CSbapl.33691	0.2	0	0	M
CSbapl.33693	0.121951	0.202024	0.0193545	M
CSbapl.38180	0.621019	1.1509	0.0805585	M
CSbapl.38183	0.0882353	0.143642	0.0141175	M
CSbapl.32126	0.0882353	0.302673	0.0278124	M
CSbapl.32121	0.131148	4.05497	0.170436	M
CSbapl.91075	0.2	0	0	M
CSbapl.32122	0.0888889	0.20481	0.0195979	M
CSbapl.91079	0.142857	0.0816284	0.00825349	M
CSbapl.32129	0.0666667	0.879296	0.0663598	M
CSbapl.32128	0.107143	0.0435076	0.00447952	M
CSbapl.611	0.72956	4.33388	0.176085	M
CSbapl.23654	0.727027	82.3177	0.46519	M
CSbapl.23657	0.1	0.0463451	0.00476514	M
CSbapl.23651	0.125	0.874997	0.0661189	M
CSbapl.74707	0.0662983	0.931549	0.0692445	M
CSbapl.8892	0.088	1.59988	0.100499	M
CSbapl.23659	0.211268	0	0	M
CSbapl.42	0.0916031	0	0	M
CSbapl.74700	0.115385	0.247559	0.0232653	M
CSbapl.18998	0.111111	0.0331552	0.00343081	M
CSbapl.18990	0.0638298	0.421199	0.036972	M
CSbapl.18991	0.0681818	0.128191	0.0126867	M
CSbapl.18993	0.104167	0.201945	0.0193475	M
CSbapl.18994	0.100529	0.434914	0.0379822	M
CSbapl.18995	0.0608696	0.0700331	0.00711981	M
CSbapl.70631	0.137255	1.70631	0.104719	M
CSbapl.69309	0.113208	0.0644161	0.00656621	M
CSbapl.66173	0.0307692	0	0	M
CSbapl.69303	0.0769231	1.62256	0.101412	M
CSbapl.66177	0.111111	0	0	M
CSbapl.66176	0.078125	0.0682511	0.0069445	M
CSbapl.69307	0.092437	5.32583	0.194025	M
CSbapl.85092	0.758368	6.96751	0.218294	M
CSbapl.12341	0.159011	0.0187319	0.00195205	M
CSbapl.12347	0.0961538	13.4004	0.280551	M
CSbapl.97892	0.166667	6.78347	0.215836	M
CSbapl.36809	0.0909091	0	0	M
CSbapl.97894	0.693989	0	0	M
CSbapl.97897	0.2	0.203229	0.0194598	M
CSbapl.36802	0.0945946	0.0514639	0.00527846	M
CSbapl.36803	0.108108	0	0	M
CSbapl.36806	0.0617647	0	0	M
CSbapl.36807	0.0697674	0	0	M
CSbapl.36804	0.142857	0.736089	0.0580227	M
CSbapl.36805	0.0645161	0.0852137	0.00860156	M
CSbapl.100173	0.0350195	0	0	M
CSbapl.100179	0.116279	0	0	M
CSbapl.34401	0.153846	1.3781	0.0911204	M
CSbapl.34402	0.72327	0.472525	0.0407037	M
CSbapl.50874	0.433333	0	0	M
CSbapl.50873	0.0697674	0	0	M
CSbapl.28123	0.111111	0.197879	0.0189911	M
CSbapl.28120	0.153846	0.276412	0.0256703	M
CSbapl.34408	0.153846	0	0	M
CSbapl.50879	0.84	3.06435	0.147494	M
CSbapl.20350	0.2	0.217452	0.0206959	M
CSbapl.20352	0.103448	0	0	M
CSbapl.95791	0.489362	4.23898	0.174197	M
CSbapl.95793	0.797987	209.848	0.56285	M
CSbapl.95795	0.839187	12.9039	0.27686	M
CSbapl.95794	0.0806452	8.77347	0.239783	M
CSbapl.64764	0.0795455	0.0798362	0.00807905	M
CSbapl.34335	0.850402	94.2508	0.479269	M
CSbapl.47961	0.0531401	1.17887	0.0819175	M
CSbapl.47963	0.82408	18.3626	0.311694	M
CSbapl.47965	0.808824	225.724	0.570486	M
CSbapl.47966	0.111842	38.7334	0.387305	M
CSbapl.47969	0.0786517	0.0756996	0.00767535	M
CSbapl.62086	0.0309735	0	0	M
CSbapl.62082	0.110092	0	0	M
CSbapl.62080	0.0977444	0.0248857	0.00258552	M
[truncated: 32,276 more rows]

## Sheet: 5mC_DEGs
DEGs	log2FoldChange	padj	F_expr_ratio	M_expr_ratio	F_genebody_C_Methyl_level	M_genebody_C_Methyl_level	F_TSS2K_C_Methyl_level	M_TSS2K_C_Methyl_level	F_TTS2K_C_Methyl_level	M_TTS2K_C_Methyl_level
[truncated: 5,923 more rows]

[truncated: 8 more sheets: 5mC_sex-related_genes, BP_shared_genes_ DMRs_vs_DEGs, KEEG_shared_genes_DMRs_vs_DEGs, DMRs, DMRs_vs_DEGs, DMR_vs_sex-related genes, DMP, DMP_vs_sex-related genes]
